# Supplementary material
Source: publisher figshare collection journal article supplement (https://gsajournals.figshare.com/articles/dataset/_/13236983)
Supplement: Supplementary file 1 [file 1]

**Table 1. Genes differentially expressed in *nr5a1a*-expressing cells**

|                  | p_val     | p_val_adj  | avg_logFC  | fold Up    | fold Down  | pct.1 | pct.2 | Chromosome | Gene Start position |
|------------------|-----------|------------|------------|------------|------------|-------|-------|------------|---------------------|
| hsd3b1           | 0         | 0          | 1.63395545 | 5.12323477 | 0.19518918 | 0.3   | 0     | 9          | 21194445            |
| cyp11a2          | 0         | 0          | 1.47424944 | 4.36708869 | 0.2289855  | 0.3   | 0     | 25         | 22296666            |
| nr5a1a           | 0         | 0          | 0.90338514 | 2.46771218 | 0.40523364 | 1     | 0     | 8          | 52833443            |
| cyp21a2          | 1.39E-201 | 4.51E-197  | 2.10827825 | 8.23225233 | 0.12147344 | 0.3   | 0.001 | 16         | 16605517            |
| nr5a1b           | 2.34E-90  | 7.61E-86   | 0.61484807 | 1.84925771 | 0.54075751 | 0.2   | 0.001 | 21         | 8276989             |
| star             | 1.59E-82  | 5.19E-78   | 4.16586064 | 64.4202939 | 0.01552306 | 0.3   | 0.002 | 8          | 44703854            |
| fdx1b            | 5.42E-28  | 1.76E-23   | 2.56917765 | 13.051607  | 0.07661892 | 0.2   | 0.003 | 5          | 22177033            |
| cracr2b          | 7.70E-26  | 2.50E-21   | 0.52832515 | 1.69599632 | 0.58962392 | 0.3   | 0.008 | 25         | 3844582             |
| sowahca          | 5.19E-21  | 1.69E-16   | 0.16270576 | 1.17667055 | 0.84985555 | 0.2   | 0.004 | 9          | 55783686            |
| zgc:172182       | 3.54E-19  | 1.15E-14   | 0.16200886 | 1.1758509  | 0.85044796 | 0.2   | 0.005 | 9          | 48386928            |
| BX901962.3       | 1.88E-15  | 6.13E-11   | 0.41436938 | 1.51335102 | 0.66078523 | 0.2   | 0.006 | 4          | 9630958             |
| tmtc2b           | 1.56E-14  | 5.07E-10   | 0.23993718 | 1.27113767 | 0.78669685 | 0.2   | 0.006 | 18         | 11858397            |
| epha3            | 3.09E-13  | 1.01E-08   | 0.22140265 | 1.24779712 | 0.80141233 | 0.2   | 0.007 | 9          | 16449398            |
| vegfab           | 1.85E-12  | 6.01E-08   | 0.3617851  | 1.43583648 | 0.69645814 | 0.5   | 0.043 | 4          | 5568688             |
| ahdc1            | 2.15E-11  | 7.00E-07   | 0.24799364 | 1.28141883 | 0.78038497 | 0.2   | 0.008 | 19         | 43439401            |
| gatad2b          | 2.54E-09  | 8.27E-05   | 0.17691664 | 1.1935097  | 0.83786499 | 0.2   | 0.01  | 19         | 41701660            |
| LO017739.1       | 4.87E-09  | 0.00015827 | 0.29374895 | 1.34140624 | 0.74548632 | 0.4   | 0.039 | 25         | 5702094             |
| DST              | 7.33E-09  | 0.00023828 | 0.22868563 | 1.25691702 | 0.79559747 | 0.2   | 0.011 | 13         | 1575276             |
| si:dkeyp-69b9.6  | 1.09E-08  | 0.00035425 | 0.38497088 | 1.46951287 | 0.68049762 | 0.5   | 0.063 | 16         | 13616239            |
| prox1b           | 1.31E-08  | 0.00042658 | 0.32736345 | 1.38725852 | 0.72084618 | 0.2   | 0.011 | 7          | 19930564            |
| si:dkey-34e4.1   | 1.40E-08  | 0.00045517 | 0.16046626 | 1.17403862 | 0.85176074 | 0.2   | 0.011 | 5          | 33537789            |
| prkag2a          | 3.60E-08  | 0.0011697  | 1.1162849  | 3.05313569 | 0.32753212 | 0.4   | 0.047 | 24         | 28252520            |
| cplx2            | 8.44E-08  | 0.00274454 | 0.66929549 | 1.95272552 | 0.51210474 | 0.5   | 0.071 | 14         | 25334604            |
| mhc1zea          | 9.23E-08  | 0.00300316 | 0.2405227  | 1.27188208 | 0.78623641 | 0.2   | 0.013 | 1          | 47116121            |
| tpd52            | 9.86E-08  | 0.00320499 | 0.17045619 | 1.18582474 | 0.84329494 | 0.2   | 0.013 | 19         | 31904836            |
| syne1b           | 1.31E-07  | 0.00426991 | 0.34000039 | 1.40489861 | 0.71179514 | 0.3   | 0.027 | 17         | 7844927             |
| vsnl1a           | 1.32E-07  | 0.00427941 | 0.22240002 | 1.24904213 | 0.80061351 | 0.3   | 0.027 | 20         | 35382482            |
| basp1            | 2.23E-07  | 0.00725348 | 0.82991625 | 2.29292936 | 0.43612333 | 0.5   | 0.076 | 2          | 42724404            |
| cbln1            | 2.40E-07  | 0.00779477 | 0.24453887 | 1.27699993 | 0.7830854  | 0.2   | 0.013 | 18         | 18104235            |
| osr2             | 3.73E-07  | 0.01212478 | 0.74384435 | 2.10384627 | 0.4753199  | 0.2   | 0.014 | 16         | 54402310            |
| CABZ01015815.1   | 3.73E-07  | 0.01213921 | 0.37799181 | 1.45929379 | 0.68526297 | 0.4   | 0.051 | 4          | 76838989            |
| agbl5            | 4.51E-07  | 0.01467941 | 0.37558697 | 1.45578901 | 0.68691273 | 0.3   | 0.031 | 4          | 737539              |
| mapk8ip1a        | 4.70E-07  | 0.01528136 | 0.14616014 | 1.15736398 | 0.86403242 | 0.2   | 0.014 | 25         | 13801716            |
| ninl             | 5.41E-07  | 0.01759761 | 0.31802197 | 1.37436114 | 0.72761079 | 0.3   | 0.031 | 13         | 7171066             |
| si:ch211-255i3.4 | 6.35E-07  | 0.02066397 | 0.31538501 | 1.37074214 | 0.72953181 | 0.2   | 0.014 | 16         | 34479064            |
| pbrm1            | 6.93E-07  | 0.02254535 | 0.15737631 | 1.17041688 | 0.85439643 | 0.2   | 0.014 | 11         | 3909756             |
| crygm2d20        | 8.76E-07  | 0.02848949 | 0.18706364 | 1.20568063 | 0.82940704 | 0.2   | 0.014 | 9          | 22212241            |
| efna3b           | 9.00E-07  | 0.02927285 | 0.13460789 | 1.14407212 | 0.87407077 | 0.2   | 0.014 | 16         | 23087326            |
| si:ch211-246i5.5 | 1.42E-06  | 0.04633268 | 0.1447916  | 1.15578132 | 0.86521557 | 0.2   | 0.015 | 3          | 24134418            |
| atp6ap11b        | 2.19E-06  | 0.07106964 | 0.22006987 | 1.24613536 | 0.80248104 | 0.2   | 0.015 | 23         | 19558574            |
| bbs5             | 2.62E-06  | 0.08518385 | 0.1807361  | 1.1980765  | 0.83467124 | 0.3   | 0.033 | 9          | 48284606            |
| rffl             | 2.79E-06  | 0.09078162 | 0.16853996 | 1.18355484 | 0.84491227 | 0.2   | 0.016 | 15         | 4549240             |
| slx1b            | 2.82E-06  | 0.0917925  | 0.36728998 | 1.44376155 | 0.69263515 | 0.3   | 0.035 | 7          | 59505081            |
