# Supplementary material
Source: publisher figshare collection journal article supplement (https://gsajournals.figshare.com/articles/dataset/_/13236983)
Supplement: Supplementary file 2 [file 1]

| Supplemental Table S8: 35dpf trunk RNA-seq data, genes differentially expressed comparing <i>nr5a1a</i> to <i>nr5a1b</i> mutants. |             |                |             |              |             |             |                  |                      |                  |
|-----------------------------------------------------------------------------------------------------------------------------------|-------------|----------------|-------------|--------------|-------------|-------------|------------------|----------------------|------------------|
| EnsemblID                                                                                                                         | baseMean    | log2FoldChange | lfcSE       | stat         | pvalue      | padj        | EnsemblGeneName  | ZFIN_ID              | ZFIN_Name        |
| ENSDARG00000001975                                                                                                                | 289.4978447 | -1.848806996   | 0.155307112 | -11.9042005  | 1.12537E-32 | 2.07045E-28 | hsd11b2          | ZDB-GENE-030131-6030 | hsd11b2          |
| ENSDARG000000020239                                                                                                               | 299.4418007 | -2.889114644   | 0.259297038 | -11.14210433 | 7.82483E-29 | 7.19806E-25 | lpin1            | ZDB-GENE-080722-2    | lpin1            |
| ENSDARG000000011665                                                                                                               | 2404.031379 | -1.804808044   | 0.171731624 | -10.50946822 | 7.81329E-26 | 4.79163E-22 | aldoaa           | ZDB-GENE-030131-8369 | aldoaa           |
| ENSDARG000000103024                                                                                                               | 8.506805503 | 43.27593798    | 4.155426738 | 10.4143186   | 2.1332E-25  | 9.81164E-22 | zgc:175136       | ZDB-GENE-080204-122  | zgc:175136       |
| ENSDARG000000068194                                                                                                               | 97.25695768 | -3.66935617    | 0.355490496 | -10.32195294 | 5.60709E-25 | 2.06318E-21 | klf9             | ZDB-GENE-060526-244  | klf9             |
| ENSDARG00000018621                                                                                                                | 310.8632036 | -3.259948951   | 0.316853069 | -10.2885194  | 7.93877E-25 | 2.43429E-21 | slc6a19a.1       | ZDB-GENE-070620-2    | slc6a19a.1       |
| ENSDARG000000100826                                                                                                               | 254.3471364 | -1.73344646    | 0.170017277 | -10.19570768 | 2.0723E-24  | 5.44659E-21 | hif1al           | ZDB-GENE-040426-1315 | hif1al           |
| ENSDARG00000070426                                                                                                                | 961.9570551 | -2.005998851   | 0.198095201 | -10.12643838 | 4.21732E-24 | 9.69878E-21 | chac1            | ZDB-GENE-030131-1957 | chac1            |
| ENSDARG00000013721                                                                                                                | 2181.888068 | -2.273341454   | 0.226939019 | -10.01741112 | 1.27807E-23 | 2.61266E-20 | g6pca.2          | ZDB-GENE-050309-17   | g6pca.2          |
| ENSDARG00000069377                                                                                                                | 27.32945936 | -4.091072709   | 0.437049536 | -9.360661379 | 7.92391E-21 | 1.45784E-17 | si:dkey-242g16.2 | ZDB-GENE-030131-8324 | si:dkey-242g16.2 |
| ENSDARG00000007671                                                                                                                | 217.6649865 | -1.337619432   | 0.143944448 | -9.292608721 | 1.50552E-20 | 2.51805E-17 | ghrb             | ZDB-GENE-071119-4    | ghrb             |
| ENSDARG00000045424                                                                                                                | 21.77831196 | 20.90083881    | 2.289676482 | 9.128293437  | 6.95875E-20 | 1.06689E-16 | zgc:173856       | ZDB-GENE-030131-5358 | zgc:173856       |
| ENSDARG00000027744                                                                                                                | 167.5747259 | -2.630405856   | 0.292904772 | -8.980413103 | 2.69752E-19 | 3.81761E-16 | gadd45ba         | ZDB-GENE-040426-1971 | gadd45ba         |
| ENSDARG000000041607                                                                                                               | 158.3568523 | -1.209089519   | 0.136270899 | -8.872690566 | 7.13995E-19 | 9.38292E-16 | eif4ebp3l        | ZDB-GENE-030826-26   | eif4ebp3l        |
| ENSDARG000000087303                                                                                                               | 376.4473634 | -1.707610279   | 0.19424494  | -8.791015514 | 1.48214E-18 | 1.8179E-15  | cebpd            | ZDB-GENE-020111-4    | cebpd            |
| ENSDARG00000075666                                                                                                                | 286.2778819 | -2.180618854   | 0.24944909  | -8.741739051 | 2.29549E-18 | 2.63953E-15 | tsc22d3          | ZDB-GENE-040426-1433 | tsc22d3          |
| ENSDARG00000035719                                                                                                                | 47.81105902 | -3.006321482   | 0.347560106 | -8.649788715 | 5.15949E-18 | 5.58378E-15 | arl5c            | ZDB-GENE-040426-1866 | arl5c            |
| ENSDARG00000019613                                                                                                                | 383.418124  | -0.968958942   | 0.112517122 | -8.611657721 | 7.20116E-18 | 7.36038E-15 | ip6k2b           | ZDB-GENE-040718-85   | ip6k2b           |
| ENSDARG00000077236                                                                                                                | 83.05563514 | -2.268778779   | 0.272880387 | -8.314187771 | 9.23828E-17 | 8.94557E-14 | hspb6            | ZDB-GENE-080214-7    | hspb6            |
| ENSDARG00000070914                                                                                                                | 314.0507767 | -1.111293791   | 0.134062386 | -8.289378004 | 1.13842E-16 | 1.04723E-13 | dupsp6           | ZDB-GENE-030613-1    | dupsp6           |
| ENSDARG000000097205                                                                                                               | 244.3177908 | -1.567518556   | 0.189843057 | -8.25691802  | 1.49482E-16 | 1.3096E-13  | ulk2             | ZDB-GENE-090218-30   | ulk2             |
| ENSDARG00000007682                                                                                                                | 758.4870963 | -1.824989791   | 0.221680734 | -8.232514217 | 1.83324E-16 | 1.53309E-13 | ppdpfa           | ZDB-GENE-030219-204  | ppdpfa           |
| ENSDARG00000000796                                                                                                                | 190.208268  | -1.708897765   | 0.20857231  | -8.193310832 | 2.54137E-16 | 2.03287E-13 | nr4a1            | ZDB-GENE-040704-11   | nr4a1            |
| ENSDARG00000040815                                                                                                                | 442.5965278 | -1.133694443   | 0.138997171 | -8.156241142 | 3.45612E-16 | 2.6494E-13  | tsku             | ZDB-GENE-030131-4683 | tsku             |
| ENSDARG00000029075                                                                                                                | 97.61254822 | -1.361962439   | 0.170880367 | -7.97026871  | 1.5833E-15  | 1.14095E-12 | pfkfb4b          | ZDB-GENE-031031-4    | pfkfb4b          |
| ENSDARG00000092924                                                                                                                | 26.87528586 | 20.4501808     | 2.566532691 | 7.968018828  | 1.61238E-15 | 1.14095E-12 | zgc:171474       | ZDB-GENE-080215-16   | zgc:171474       |
| ENSDARG00000011122                                                                                                                | 141.8906159 | -1.815680742   | 0.228132199 | -7.958897286 | 1.73579E-15 | 1.18278E-12 | pptc7a           | ZDB-GENE-041114-74   | pptc7a           |
| ENSDARG00000042667                                                                                                                | 576.2979129 | -2.126300177   | 0.268399324 | -7.922151764 | 2.33435E-15 | 1.53384E-12 | klf2a            | ZDB-GENE-011109-1    | klf2a            |
| ENSDARG00000092126                                                                                                                | 11.67012718 | -5.852571528   | 0.740050377 | -7.908342064 | 2.60839E-15 | 1.6548E-12  | vtg5             | ZDB-GENE-001201-4    | vtg5             |
| ENSDARG00000092052                                                                                                                | 26.05752373 | -4.325523049   | 0.55109146  | -7.849011215 | 4.1933E-15  | 2.57161E-12 | gstk4            | ZDB-GENE-060421-6530 | gstk4            |
| ENSDARG00000061368                                                                                                                | 130.392681  | -1.374753305   | 0.177120507 | -7.761683444 | 8.38094E-15 | 4.97395E-12 | klf13            | ZDB-GENE-060929-1274 | klf13            |
| ENSDARG00000069381                                                                                                                | 26.06185693 | 4.447209441    | 0.584532894 | 7.608142302  | 2.78064E-14 | 1.59869E-11 | si:ch211-125e6.5 | ZDB-GENE-070912-39   | si:ch211-125e6.5 |
| ENSDARG00000099517                                                                                                                | 448.5743415 | -1.313049479   | 0.172927372 | -7.593069049 | 3.12416E-14 | 1.74177E-11 | adssl1           | ZDB-GENE-040516-18   | adssl1           |
| ENSDARG00000075564                                                                                                                | 132.6191954 | -1.333402781   | 0.176805132 | -7.54165202  | 4.64055E-14 | 2.51108E-11 | fam13a           | ZDB-GENE-050208-102  | fam13a           |
| ENSDARG00000031616                                                                                                                | 56.80693832 | -1.608607479   | 0.214911291 | -7.484983544 | 7.15561E-14 | 3.7614E-11  | g6pca.1          | ZDB-GENE-031001-4    | g6pca.1          |
| ENSDARG00000074526                                                                                                                | 38.01897527 | -3.064833943   | 0.41008717  | -7.473615769 | 7.80207E-14 | 3.98729E-11 | zbtb16b          | ZDB-GENE-100923-1    | zbtb16b          |
| ENSDARG00000076520                                                                                                                | 26.53038433 | -2.181981872   | 0.29366795  | -7.430098769 | 1.08517E-13 | 5.39592E-11 | mafb             | ZDB-GENE-141211-38   | mafb             |
| ENSDARG00000003109                                                                                                                | 276.1385781 | 1.251921706    | 0.168677381 | 7.421989258  | 1.15374E-13 | 5.58593E-11 | rcan1a           | ZDB-GENE-040801-135  | rcan1a           |
| ENSDARG00000007086                                                                                                                | 193.6672324 | -1.5998461     | 0.215886432 | -7.410591226 | 1.25738E-13 | 5.93159E-11 | aqp10a           | ZDB-GENE-040718-40   | aqp10a           |
| ENSDARG00000006580                                                                                                                | 8.787611977 | 30.29219302    | 4.11734736  | 7.357210935  | 1.87792E-13 | 8.63752E-11 | clndnd           | ZDB-GENE-010328-4    | clndnd           |
| ENSDARG000000086856                                                                                                               | 56.76127004 | -1.488419814   | 0.202801555 | -7.339291903 | 2.14727E-13 | 9.63547E-11 | stk35            | ZDB-GENE-061103-553  | stk35            |

|                     |             |              |             |              |             |             |                   |                      |                   |
|---------------------|-------------|--------------|-------------|--------------|-------------|-------------|-------------------|----------------------|-------------------|
| ENSDARG00000028396  | 530.1083819 | -4.787359373 | 0.655172229 | -7.307024258 | 2.73123E-13 | 1.19641E-10 | fkbp5             | ZDB-GENE-030616-630  | fkbp5             |
| ENSDARG00000098408  | 99.00899531 | -1.420607841 | 0.194709823 | -7.296025547 | 2.96393E-13 | 1.26815E-10 | stbd1             | ZDB-GENE-120817-2    | stbd1             |
| ENSDARG00000038429  | 130.2648377 | -1.129907217 | 0.1559996   | -7.243013557 | 4.38823E-13 | 1.83488E-10 | csrnp1b           | ZDB-GENE-030131-1515 | csrnp1b           |
| ENSDARG00000078394  | 4.975737802 | 34.35297754  | 4.748369106 | 7.234689801  | 4.66594E-13 | 1.90765E-10 | CABZ01059627.1    |                      |                   |
| ENSDARG00000040253  | 62.46944014 | -2.175717602 | 0.305346675 | -7.125401324 | 1.03778E-12 | 4.15066E-10 | onecutl           | ZDB-GENE-020531-1    | onecutl           |
| ENSDARG00000042904  | 331.8452996 | -0.933084887 | 0.131040572 | -7.120580057 | 1.07474E-12 | 4.20703E-10 | foxo3b            | ZDB-GENE-990708-6    | foxo3b            |
| ENSDARG00000012968  | 185.9436121 | -0.747753106 | 0.105086272 | -7.115611665 | 1.11418E-12 | 4.27054E-10 | rhoub             | ZDB-GENE-050417-308  | rhoub             |
| ENSDARG00000091260  | 132.01416   | -1.318347523 | 0.185718236 | -7.098643344 | 1.25987E-12 | 4.73044E-10 | mylk4a            | ZDB-GENE-120824-2    | mylk4a            |
| ENSDARG00000058556  | 271.5131585 | -2.59818488  | 0.366753879 | -7.08427376  | 1.39775E-12 | 5.14317E-10 | muc5.2            | ZDB-GENE-121108-1    | muc5.2            |
| ENSDARG00000091209  | 71.94187003 | -2.427821909 | 0.343579908 | -7.066251127 | 1.59175E-12 | 5.74217E-10 | ucp3              | ZDB-GENE-040426-1317 | ucp3              |
| ENSDARG00000026771  | 89.17723123 | -1.249752021 | 0.177334745 | -7.0474177   | 1.82269E-12 | 6.4488E-10  | tmem41ab          | ZDB-GENE-040426-2050 | tmem41ab          |
| ENSDARG00000036107  | 853.4621967 | -1.136235271 | 0.161547226 | -7.033455786 | 2.0148E-12  | 6.99401E-10 | txnipa            | ZDB-GENE-030804-10   | txnipa            |
| ENSDARG00000042055  | 44.11375974 | -2.318967572 | 0.33011731  | -7.024677303 | 2.14562E-12 | 7.31019E-10 | fam129aa          | ZDB-GENE-041014-181  | fam129aa          |
| ENSDARG00000020298  | 119.7201683 | -1.776610221 | 0.254213174 | -6.988663064 | 2.77518E-12 | 9.28323E-10 | btg2              | ZDB-GENE-000210-15   | btg2              |
| ENSDARG00000015611  | 34.07155095 | -1.51614463  | 0.217229673 | -6.979454553 | 2.96328E-12 | 9.73544E-10 | rasl11b           | ZDB-GENE-040426-793  | rasl11b           |
| ENSDARG000000103038 | 97.76709608 | -1.014893441 | 0.145763505 | -6.962603188 | 3.34042E-12 | 1.06982E-09 | pik3r3a           | ZDB-GENE-040426-1978 | pik3r3a           |
| ENSDARG00000007344  | 220.6744697 | -1.605441824 | 0.230625445 | -6.96125194  | 3.37262E-12 | 1.06982E-09 | tcap              | ZDB-GENE-070501-5    | tcap              |
| ENSDARG00000089885  | 53.83462165 | -1.933293632 | 0.278209989 | -6.949044624 | 3.67768E-12 | 1.14681E-09 | slc16a12b         | ZDB-GENE-050522-80   | slc16a12b         |
| ENSDARG00000017665  | 121.8976364 | -1.345608479 | 0.193806247 | -6.943060413 | 3.83695E-12 | 1.17654E-09 | snrkb             | ZDB-GENE-040426-1724 | snrkb             |
| ENSDARG00000037618  | 102.7295178 | -3.059282664 | 0.442203739 | -6.918265036 | 4.57208E-12 | 1.37897E-09 | ddit4             | ZDB-GENE-031002-35   | ddit4             |
| ENSDARG00000095615  | 31.66633725 | -2.035218537 | 0.295943    | -6.877062596 | 6.10993E-12 | 1.81307E-09 | si:dkeyp-86h10.3  | ZDB-GENE-100922-65   | si:dkeyp-86h10.3  |
| ENSDARG00000020455  | 61.03755574 | -1.094451756 | 0.159595296 | -6.857669252 | 6.99931E-12 | 2.04402E-09 | si:ch211-171h4.3  | ZDB-GENE-081031-85   | si:ch211-171h4.3  |
| ENSDARG00000059646  | 107.7855135 | -0.979945011 | 0.143586364 | -6.824777658 | 8.80616E-12 | 2.5315E-09  | nt5dc2            | ZDB-GENE-060810-17   | nt5dc2            |
| ENSDARG00000077982  | 114.4860993 | 1.202519026  | 0.177392743 | 6.778851304  | 1.21135E-11 | 3.42868E-09 | elf3              | ZDB-GENE-030131-8760 | elf3              |
| ENSDARG00000007693  | 252.6128494 | -1.10321848  | 0.163658395 | -6.74098313  | 1.57318E-11 | 4.38537E-09 | nfkbiab           | ZDB-GENE-030131-1819 | nfkbiab           |
| ENSDARG00000019360  | 610.6562594 | -0.792531711 | 0.117825533 | -6.726315514 | 1.74013E-11 | 4.77835E-09 | sec23b            | ZDB-GENE-030131-5479 | sec23b            |
| ENSDARG00000096712  | 145.2698687 | -1.549621623 | 0.230530091 | -6.721992858 | 1.79256E-11 | 4.84258E-09 | si:dkey-193p11.2  | ZDB-GENE-030131-8407 | si:dkey-193p11.2  |
| ENSDARG00000031336  | 88.17168821 | -1.204546663 | 0.179245707 | -6.720086536 | 1.81617E-11 | 4.84258E-09 | hsd20b2           | ZDB-GENE-030804-21   | hsd20b2           |
| ENSDARG00000099860  | 1211.850691 | -1.120311162 | 0.166944646 | -6.710674386 | 1.93727E-11 | 5.0917E-09  | pkmb              | ZDB-GENE-040801-230  | pkmb              |
| ENSDARG00000093494  | 34.30948456 | -1.716075846 | 0.256591477 | -6.687969013 | 2.26289E-11 | 5.86375E-09 | si:ch211-217k17.9 | ZDB-GENE-061207-21   | si:ch211-217k17.9 |
| ENSDARG000000102572 | 70.05706488 | -1.491332378 | 0.225757982 | -6.60588993  | 3.95136E-11 | 1.00968E-08 | si:ch211-260e23.9 | ZDB-GENE-141222-48   | si:ch211-260e23.9 |
| ENSDARG00000054835  | 23.71175891 | -1.649376082 | 0.249832675 | -6.601922995 | 4.05858E-11 | 1.02287E-08 | ugt5f1            | ZDB-GENE-100406-6    | ugt5f1            |
| ENSDARG00000003820  | 236.1325412 | -2.566950349 | 0.389648363 | -6.587863811 | 4.462E-11   | 1.10935E-08 | nr1d2a            | ZDB-GENE-040504-1    | nr1d2a            |
| ENSDARG00000099719  | 14.67071504 | -3.088312793 | 0.47550752  | -6.494771724 | 8.31594E-11 | 2.03996E-08 | cdkn1d            | ZDB-GENE-110215-1    | cdkn1d            |
| ENSDARG00000068708  | 207.9882285 | -0.827660146 | 0.128665633 | -6.432643466 | 1.25404E-10 | 3.03576E-08 | ifrd1             | ZDB-GENE-030131-6132 | ifrd1             |
| ENSDARG00000094265  | 21.24000331 | 1.572644584  | 0.246296411 | 6.385170524  | 1.71207E-10 | 4.09073E-08 | si:dkey-183n20.15 | ZDB-GENE-041001-160  | si:dkey-183n20.15 |
| ENSDARG000000104039 | 173.1613809 | -1.266595919 | 0.198697983 | -6.374477989 | 1.83587E-10 | 4.3303E-08  | errfi1a           | ZDB-GENE-030131-6256 | errfi1a           |
| ENSDARG00000035869  | 920.6705713 | -0.567454162 | 0.089193939 | -6.362026003 | 1.9911E-10  | 4.63699E-08 | azin1b            | ZDB-GENE-030121-1    | azin1b            |
| ENSDARG000000104576 | 178.9488895 | -2.271893263 | 0.357351079 | -6.357594532 | 2.04938E-10 | 4.71305E-08 | si:ch211-152c8.5  | ZDB-GENE-030131-5764 | si:ch211-152c8.5  |
| ENSDARG00000053853  | 2455.738839 | -1.523838614 | 0.24065402  | -6.33207214  | 2.4189E-10  | 5.4942E-08  | slc13a2           | ZDB-GENE-040426-2389 | slc13a2           |
| ENSDARG00000036830  | 5601.453125 | -0.981540856 | 0.155179127 | -6.32521186  | 2.52885E-10 | 5.63354E-08 | krt91             | ZDB-GENE-040801-181  | krt91             |
| ENSDARG00000009505  | 362.0432403 | -1.102774598 | 0.174367096 | -6.324442075 | 2.54149E-10 | 5.63354E-08 | prelid3b          | ZDB-GENE-031002-13   | prelid3b          |
| ENSDARG00000058371  | 7784.575101 | -0.926010935 | 0.14669522  | -6.312481989 | 2.74595E-10 | 6.01429E-08 | krt5              | ZDB-GENE-991110-23   | krt5              |

|                    |             |              |             |              |             |             |                  |                      |                   |
|--------------------|-------------|--------------|-------------|--------------|-------------|-------------|------------------|----------------------|-------------------|
| ENSDARG0000007184  | 36.17916022 | -2.14558017  | 0.341702326 | -6.279091497 | 3.40557E-10 | 7.37126E-08 | zbtb16a          | ZDB-GENE-030131-1989 | zbtb16a           |
| ENSDARG0000002548  | 76.81668131 | -2.125623381 | 0.33919032  | -6.266757207 | 3.68644E-10 | 7.88642E-08 | socs3a           | ZDB-GENE-030131-7349 | socs3a            |
| ENSDARG00000102146 | 120.8441344 | -2.876039496 | 0.459425091 | -6.260083633 | 3.84771E-10 | 8.1368E-08  | si:ch211-69b7.6  | ZDB-GENE-141212-266  | si:ch211-69b7.6   |
| ENSDARG00000068372 | 9.569120113 | -6.26643594  | 1.003677807 | -6.243473649 | 4.27958E-10 | 8.94725E-08 | zgc:158427       | ZDB-GENE-061215-110  | zgc:158427        |
| ENSDARG00000057571 | 846.9048483 | -1.01695798  | 0.163609099 | -6.215778861 | 5.10707E-10 | 1.05573E-07 | pgam2            | ZDB-GENE-040116-6    | pgam2             |
| ENSDARG0000005565  | 125.3793092 | -1.238669172 | 0.199794164 | -6.199726492 | 5.65614E-10 | 1.15624E-07 | entpd8           | ZDB-GENE-040724-142  | entpd8            |
| ENSDARG00000034600 | 116.7635806 | -0.672717041 | 0.108947433 | -6.174693818 | 6.62918E-10 | 1.34026E-07 | tmem165          | ZDB-GENE-030131-3222 | tmem165           |
| ENSDARG00000017180 | 298.0362864 | -0.650135376 | 0.105637123 | -6.15442144  | 7.53521E-10 | 1.50688E-07 | npc1             | ZDB-GENE-030131-3161 | npc1              |
| ENSDARG00000041051 | 65.62418397 | -1.434194167 | 0.233162852 | -6.151040588 | 7.69762E-10 | 1.5228E-07  | mid1ip1a         | ZDB-GENE-990415-81   | mid1ip1a          |
| ENSDARG00000069735 | 21.67953976 | -3.615413563 | 0.591149913 | -6.115899677 | 9.60137E-10 | 1.87921E-07 | hbaa2            | ZDB-GENE-081104-38   | hbaa2             |
| ENSDARG00000067741 | 231.8302681 | -0.854175712 | 0.139912314 | -6.105078893 | 1.0275E-09  | 1.98989E-07 | itpkcb           | ZDB-GENE-080225-27   | itpkcb            |
| ENSDARG00000028725 | 34.31022666 | -1.273634334 | 0.210387884 | -6.05374374  | 1.41518E-09 | 2.71213E-07 | adra1aa          | ZDB-GENE-030131-2831 | adra1aa           |
| ENSDARG00000077473 | 172.0126919 | -1.215688642 | 0.200962957 | -6.049317055 | 1.45461E-09 | 2.75896E-07 | mych             | ZDB-GENE-030219-51   | mych              |
| ENSDARG00000011245 | 72.2479883  | -1.105621724 | 0.182964196 | -6.042831044 | 1.51433E-09 | 2.84293E-07 | esrp1            | ZDB-GENE-070112-1732 | esrp1             |
| ENSDARG00000061896 | 168.2407073 | -1.311967679 | 0.217370986 | -6.035615447 | 1.58358E-09 | 2.9429E-07  | slco2a1          | ZDB-GENE-060606-3    | slco2a1           |
| ENSDARG00000002259 | 11.71944231 | 3.70096455   | 0.618626651 | 5.98254948   | 2.19672E-09 | 4.04152E-07 | ca15c            | ZDB-GENE-061013-737  | ca15c             |
| ENSDARG00000093704 | 4.751079804 | 18.77356326  | 3.172918243 | 5.916812795  | 3.2824E-09  | 5.97917E-07 | si:dkeyp-46h3.8  | ZDB-GENE-060503-183  | si:dkeyp-46h3.8   |
| ENSDARG00000055518 | 760.7427117 | -1.180099628 | 0.201070405 | -5.86908663  | 4.38202E-09 | 7.90397E-07 | pygma            | ZDB-GENE-050522-482  | pygma             |
| ENSDARG00000038106 | 119.5873487 | -0.700455039 | 0.119503338 | -5.861384725 | 4.59023E-09 | 8.19913E-07 | slc37a4a         | ZDB-GENE-040426-2230 | slc37a4a          |
| ENSDARG00000061242 | 186.1663469 | -0.982147215 | 0.168449713 | -5.830506909 | 5.52593E-09 | 9.77557E-07 | tuft1a           | ZDB-GENE-061103-184  | tuft1a            |
| ENSDARG00000060797 | 110.737801  | -1.059078367 | 0.181917144 | -5.821762294 | 5.82303E-09 | 1.02031E-06 | pfkmb            | ZDB-GENE-081114-1    | pfkmb             |
| ENSDARG00000103826 | 327.7713301 | -1.103254556 | 0.189732279 | -5.814796308 | 6.07078E-09 | 1.04906E-06 | gpib             | ZDB-GENE-020513-3    | gpib              |
| ENSDARG00000041433 | 553.2621876 | -1.666045056 | 0.286559368 | -5.813961239 | 6.10115E-09 | 1.04906E-06 | si:dkey-7c18.24  | ZDB-GENE-041014-63   | si:dkey-7c18.24   |
| ENSDARG00000046053 | 62.50326774 | -1.995842213 | 0.345454258 | -5.777442801 | 7.58445E-09 | 1.29202E-06 | slc27a6          | ZDB-GENE-060825-27   | slc27a6           |
| ENSDARG00000011371 | 140.4107802 | 0.96494704   | 0.167075879 | 5.775501814  | 7.67241E-09 | 1.29502E-06 | zgc:64106        | ZDB-GENE-040426-1370 | zgc:64106         |
| ENSDARG00000029497 | 46.63571565 | -1.778894205 | 0.30826085  | -5.770743197 | 7.89227E-09 | 1.32002E-06 | tfcp2l1          | ZDB-GENE-040704-58   | tfcp2l1           |
| ENSDARG00000101778 | 187.6060301 | -0.873588725 | 0.151576081 | -5.763367933 | 8.24518E-09 | 1.36662E-06 | ca5a             | ZDB-GENE-080220-57   | ca5a              |
| ENSDARG00000043009 | 158.7153387 | -0.712565829 | 0.123734414 | -5.75883304  | 8.46974E-09 | 1.39131E-06 | fam43a           | ZDB-GENE-030131-6098 | fam43a            |
| ENSDARG00000100691 | 203.3253983 | 1.194713198  | 0.20854968  | 5.72867432   | 1.01219E-08 | 1.64109E-06 | prss35           | ZDB-GENE-040704-55   | prss35            |
| ENSDARG00000101749 | 211.071462  | 0.976040272  | 0.170401348 | 5.72789056   | 1.01687E-08 | 1.64109E-06 | zgc:92161        | ZDB-GENE-040912-22   | zgc:92161         |
| ENSDARG00000069615 | 423.9524308 | -1.32426972  | 0.231926156 | -5.709876558 | 1.13058E-08 | 1.80873E-06 | ckmt2a           | ZDB-GENE-030131-5717 | ckmt2a            |
| ENSDARG00000091234 | 36.40978774 | -1.620419549 | 0.28423511  | -5.700983063 | 1.19118E-08 | 1.88926E-06 | si:ch73-335121.4 | ZDB-GENE-160728-105  | si:ch73-335121.4  |
| ENSDARG00000063572 | 867.7332935 | -0.637948745 | 0.111971916 | -5.697399584 | 1.21649E-08 | 1.9129E-06  | perp             | ZDB-GENE-050104-1    | perp              |
| ENSDARG00000016011 | 526.7834959 | -0.790237037 | 0.138900285 | -5.689239845 | 1.27606E-08 | 1.98957E-06 | gpcpd1           | ZDB-GENE-060503-472  | gpcpd1            |
| ENSDARG00000095147 | 12.42051998 | 2.104552731  | 0.370679434 | 5.677554616  | 1.36634E-08 | 2.11243E-06 | krt96            | ZDB-GENE-030131-221  | krt96             |
| ENSDARG00000037012 | 111.9606082 | -0.934581735 | 0.165500562 | -5.647000359 | 1.63271E-08 | 2.50322E-06 | slc3a2b          | ZDB-GENE-040122-2    | slc3a2b           |
| ENSDARG00000057687 | 16.22314425 | -1.723012068 | 0.306279323 | -5.625623218 | 1.84839E-08 | 2.81048E-06 | sbk3             | ZDB-GENE-080204-39   | sbk3              |
| ENSDARG00000097082 | 25.23437228 | -1.307012007 | 0.233826764 | -5.589659554 | 2.27515E-08 | 3.431E-06   | im:7152348       | ZDB-GENE-041111-308  | im:7152348        |
| ENSDARG00000006137 | 12.64481614 | -3.62065199  | 0.649523646 | -5.574318981 | 2.485E-08   | 3.71699E-06 | star             | ZDB-GENE-001120-3    | star              |
| ENSDARG00000043475 | 51.79636867 | -1.101555589 | 0.197676836 | -5.572507187 | 2.51099E-08 | 3.72558E-06 | TAGAP            | ZDB-GENE-121214-340  | si:ch211-122h15.4 |
| ENSDARG00000043475 | 51.79636867 | -1.101555589 | 0.197676836 | -5.572507187 | 2.51099E-08 | 3.72558E-06 | TAGAP            | ZDB-GENE-040724-50   | tagapb            |
| ENSDARG00000071076 | 404.0198113 | -2.051538532 | 0.36998463  | -5.544929077 | 2.94073E-08 | 4.32829E-06 | ldhbb            | ZDB-GENE-040718-176  | ldhbb             |
| ENSDARG00000036848 | 112.7729195 | -1.134507436 | 0.205055943 | -5.532672789 | 3.15387E-08 | 4.60516E-06 | slc43a2a         | ZDB-GENE-040426-964  | slc43a2a          |

|                     |             |              |             |              |             |             |                   |                      |                   |
|---------------------|-------------|--------------|-------------|--------------|-------------|-------------|-------------------|----------------------|-------------------|
| ENSDARG00000087093  | 60.60172512 | -1.70234526  | 0.309069062 | -5.507976919 | 3.62981E-08 | 5.24402E-06 | si:ch211-157c3.4  | ZDB-GENE-030131-8454 | si:ch211-157c3.4  |
| ENSDARG00000070826  | 24.76807287 | -1.092221719 | 0.198330578 | -5.50707676  | 3.64841E-08 | 5.24402E-06 | bpgm              | ZDB-GENE-040718-375  | bpgm              |
| ENSDARG00000060109  | 30.04494609 | -1.006583038 | 0.184344285 | -5.460343073 | 4.75215E-08 | 6.76255E-06 | aggf1             | ZDB-GENE-060929-836  | aggf1             |
| ENSDARG00000044010  | 76.68547307 | -1.079701966 | 0.19777062  | -5.459364814 | 4.77841E-08 | 6.76255E-06 | lox12a            | ZDB-GENE-070818-1    | lox12a            |
| ENSDARG00000039007  | 3661.598659 | -0.688405893 | 0.126236946 | -5.453283783 | 6.94481E-08 | 6.94462E-06 | eno3              | ZDB-GENE-031006-5    | eno3              |
| ENSDARG00000012366  | 48.00462376 | -1.11870166  | 0.205542881 | -5.442668    | 5.24884E-08 | 7.31577E-06 | fbp2              | ZDB-GENE-040822-23   | fbp2              |
| ENSDARG00000015890  | 153.5467796 | -1.050460461 | 0.193146758 | -5.438664728 | 5.36814E-08 | 7.42579E-06 | mafa              | ZDB-GENE-010605-2    | mafa              |
| ENSDARG00000079589  | 131.5848738 | 6.071749455  | 1.117700833 | 5.432356564  | 5.56147E-08 | 7.62513E-06 | si:dkeyp-73d8.6   | ZDB-GENE-070912-683  | si:dkeyp-73d8.6   |
| ENSDARG00000056836  | 305.2568583 | -1.246528846 | 0.229509232 | -5.431279748 | 5.59513E-08 | 7.62513E-06 | si:ch211-125o16.4 | ZDB-GENE-131120-100  | si:ch211-125o16.4 |
| ENSDARG00000032801  | 20.65003017 | 1.556834519  | 0.28678305  | 5.42861413   | 5.67933E-08 | 7.68297E-06 | grk5              | ZDB-GENE-091204-274  | grk5              |
| ENSDARG00000020114  | 151.9891844 | -1.038088324 | 0.191480561 | -5.421377085 | 5.91417E-08 | 7.94225E-06 | slc20a1a          | ZDB-GENE-040426-2217 | slc20a1a          |
| ENSDARG000000103720 | 422.6751942 | -0.864340763 | 0.159544487 | -5.417553299 | 6.04201E-08 | 8.05514E-06 | zgc:162730        | ZDB-GENE-030131-6366 | zgc:162730        |
| ENSDARG000000100352 | 115.3934128 | -1.448377963 | 0.267668467 | -5.411089243 | 6.26425E-08 | 8.29135E-06 | aglb              | ZDB-GENE-050309-54   | aglb              |
| ENSDARG00000057032  | 32.90305035 | 1.104090083  | 0.204847805 | 5.389806763  | 7.05335E-08 | 9.26911E-06 | ppm1nb            | ZDB-GENE-071004-34   | ppm1nb            |
| ENSDARG00000074663  | 79.14999591 | -0.945385953 | 0.175462361 | -5.387970078 | 7.12579E-08 | 9.29789E-06 | SAMD8             | ZDB-GENE-070410-30   | zgc:162183        |
| ENSDARG00000021439  | 691.9110344 | -0.540607162 | 0.100390394 | -5.38504871  | 7.2425E-08  | 9.38363E-06 | ncoa4             | ZDB-GENE-040426-689  | ncoa4             |
| ENSDARG00000056795  | 72.3316185  | -0.956402166 | 0.177793674 | -5.379281175 | 7.47838E-08 | 9.62149E-06 | serpine1          | ZDB-GENE-070912-60   | serpine1          |
| ENSDARG000000103380 | 43.34865669 | 1.659935107  | 0.309818073 | 5.357773641  | 8.42537E-08 | 1.07444E-05 | si:ch73-21k16.1   | ZDB-GENE-081031-51   | si:ch73-21k16.1   |
| ENSDARG00000014179  | 203.5803529 | -1.145911724 | 0.213914718 | -5.35686246  | 8.46795E-08 | 1.07444E-05 | pfkma             | ZDB-GENE-040912-135  | pfkma             |
| ENSDARG00000020761  | 198.9465446 | -0.976318018 | 0.182619269 | -5.346193887 | 8.9823E-08  | 1.13189E-05 | arrdc2            | ZDB-GENE-030131-7146 | arrdc2            |
| ENSDARG00000043587  | 150.590179  | -0.691934623 | 0.129553294 | -5.340926512 | 9.24727E-08 | 1.15736E-05 | srd5a2a           | ZDB-GENE-050417-199  | srd5a2a           |
| ENSDARG00000087188  | 458.710279  | -1.272722307 | 0.238623114 | -5.333608664 | 9.62799E-08 | 1.19686E-05 | nfil3-6           | ZDB-GENE-040704-63   | nfil3-6           |
| ENSDARG00000042737  | 68.3116666  | -1.237979744 | 0.23258087  | -5.322792638 | 1.02186E-07 | 1.26176E-05 | slc52a3           | ZDB-GENE-060421-4490 | slc52a3           |
| ENSDARG00000018524  | 273.247774  | -0.847656698 | 0.160257237 | -5.289350509 | 1.22751E-07 | 1.50559E-05 | midn              | ZDB-GENE-030131-2433 | midn              |
| ENSDARG000000102020 | 111.5294555 | -0.904307908 | 0.172072598 | -5.255385918 | 1.47714E-07 | 1.79977E-05 | pnpla3            | ZDB-GENE-040718-27   | pnpla3            |
| ENSDARG00000037836  | 118.581727  | -1.392200306 | 0.2662392   | -5.229133445 | 1.70306E-07 | 2.06138E-05 | igfals            | ZDB-GENE-061009-25   | igfals            |
| ENSDARG00000012609  | 2780.628526 | -1.77758722  | 0.340917623 | -5.214125354 | 1.84687E-07 | 2.22083E-05 | hpx a             |                      |                   |
| ENSDARG00000069734  | 26.05122144 | -3.333234145 | 0.640195077 | -5.206591343 | 1.92341E-07 | 2.29785E-05 | hbba2             | ZDB-GENE-040801-164  | hbba2             |
| ENSDARG00000076773  | 126.57819   | 1.183925886  | 0.227709705 | 5.199277227  | 2.00065E-07 | 2.37471E-05 | lrrc58a           | ZDB-GENE-090312-76   | lrrc58a           |
| ENSDARG00000008363  | 185.2923196 | -0.681978157 | 0.131773852 | -5.175367835 | 2.27462E-07 | 2.6826E-05  | mcl1b             | ZDB-GENE-030825-1    | mcl1b             |
| ENSDARG00000043457  | 8660.890259 | -0.641966003 | 0.124263587 | -5.166163477 | 2.38948E-07 | 2.8001E-05  | gapdh             | ZDB-GENE-030115-1    | gapdh             |
| ENSDARG00000027355  | 2505.201806 | -0.639174211 | 0.123774252 | -5.16403209  | 2.41686E-07 | 2.81427E-05 | slc25a4           | ZDB-GENE-030131-5275 | slc25a4           |
| ENSDARG00000020876  | 263.3240618 | -1.5189391   | 0.294802667 | -5.152392673 | 2.57184E-07 | 2.9586E-05  | pdk2a             | ZDB-GENE-120910-1    | pdk2a             |
| ENSDARG00000013522  | 2580.434149 | -2.023105955 | 0.392659981 | -5.152310027 | 2.57297E-07 | 2.9586E-05  | pck1              | ZDB-GENE-030909-11   | pck1              |
| ENSDARG00000042807  | 134.0536702 | -0.869720041 | 0.169177687 | -5.140867312 | 2.73473E-07 | 3.12507E-05 | slc16a4           | ZDB-GENE-070112-602  | slc16a4           |
| ENSDARG00000004745  | 93.97652074 | -0.76124036  | 0.14818969  | -5.136931996 | 2.7926E-07  | 3.1715E-05  | lmb1              | ZDB-GENE-030131-9906 | lmb1              |
| ENSDARG00000071288  | 18.08099953 | -1.370088604 | 0.26815863  | -5.109246733 | 3.23446E-07 | 3.65077E-05 | samhd1            | ZDB-GENE-090313-386  | samhd1            |
| ENSDARG00000033566  | 5.085319212 | -4.040496124 | 0.791091823 | -5.107493225 | 3.26461E-07 | 3.66233E-05 | cyp17a1           | ZDB-GENE-040213-2    | cyp17a1           |
| ENSDARG00000093584  | 40.98829869 | -1.894274526 | 0.37127009  | -5.102146872 | 3.35822E-07 | 3.74452E-05 | zgc:193505        | ZDB-GENE-030131-7103 | zgc:193505        |
| ENSDARG00000069946  | 300.5415561 | -0.84776061  | 0.166483839 | -5.092149571 | 3.54027E-07 | 3.92372E-05 | itga6b            | ZDB-GENE-050320-5    | itga6b            |
| ENSDARG00000074635  | 514.4011324 | -0.967979479 | 0.190308826 | -5.086361452 | 3.64998E-07 | 4.0211E-05  | abca1a            | ZDB-GENE-031006-12   | abca1a            |
| ENSDARG00000062182  | 60.40142809 | -0.954817306 | 0.188148347 | -5.07481103  | 3.87881E-07 | 4.24776E-05 | slc22a7b.3        | ZDB-GENE-131120-103  | slc22a7b.3        |
| ENSDARG00000051861  | 469.5602254 | -0.794001512 | 0.156503182 | -5.073388946 | 3.90793E-07 | 4.25432E-05 | pkp3a             | ZDB-GENE-060512-114  | pkp3a             |

|                     |             |              |             |               |             |             |                  |                      |                  |
|---------------------|-------------|--------------|-------------|---------------|-------------|-------------|------------------|----------------------|------------------|
| ENSDARG00000033684  | 11.9423092  | 2.483759719  | 0.490257179 | 5.066238341   | 4.05754E-07 | 4.37585E-05 | oxgr1a.1         | ZDB-GENE-060421-6734 | oxgr1a.1         |
| ENSDARG00000098761  | 25.45616945 | -1.669244669 | 0.329513279 | -5.065788765  | 4.06713E-07 | 4.37585E-05 | rgs2             | ZDB-GENE-040718-410  | rgs2             |
| ENSDARG00000006120  | 107.7753953 | 0.674233388  | 0.13319032  | 5.062180082   | 4.14489E-07 | 4.40976E-05 | tbx2b            | ZDB-GENE-990726-27   | tbx2b            |
| ENSDARG00000052279  | 103.4152063 | 1.035688217  | 0.204596456 | 5.062102436   | 4.14658E-07 | 4.40976E-05 | osgn1            | ZDB-GENE-040426-864  | osgn1            |
| ENSDARG000000102911 | 20.5409113  | -0.945732797 | 0.187444231 | -5.045408928  | 4.52552E-07 | 4.77189E-05 | iffo2b           | ZDB-GENE-121030-9    | iffo2b           |
| ENSDARG00000089724  | 21.815473   | -1.652631969 | 0.327588476 | -5.044841587  | 4.53897E-07 | 4.77189E-05 | cyl1db           | ZDB-GENE-100208-1    | cyl1db           |
| ENSDARG000000100020 | 197.1381125 | -0.918268873 | 0.182622436 | -5.028236921  | 4.9501E-07  | 5.17454E-05 | pim1             | ZDB-GENE-061013-139  | pim1             |
| ENSDARG000000106630 | 11.83782273 | -1.89035442  | 0.376375702 | -5.022519811  | 5.09979E-07 | 5.3009E-05  | LO018627.1       |                      |                  |
| ENSDARG00000036833  | 38.0507555  | -2.56505229  | 0.510980256 | -5.019865756  | 5.17076E-07 | 5.34447E-05 | upp2             | ZDB-GENE-040426-830  | upp2             |
| ENSDARG00000021372  | 607.5949444 | -0.722476874 | 0.144080495 | -5.01439749   | 5.31999E-07 | 5.468E-05   | tob1b            | ZDB-GENE-040426-2151 | tob1b            |
| ENSDARG00000031702  | 65.91818218 | -1.100326154 | 0.219757396 | -5.007003976  | 5.52838E-07 | 5.65062E-05 | prkg1b           | ZDB-GENE-080225-40   | prkg1b           |
| ENSDARG00000038561  | 7.006851844 | -1.843570571 | 0.369231823 | -4.992989378  | 5.94518E-07 | 6.04306E-05 | klf6b            | ZDB-GENE-070912-633  | klf6b            |
| ENSDARG000000104129 | 10.54542637 | -1.853109651 | 0.371282459 | -4.991104761  | 6.00349E-07 | 6.06881E-05 | si:dkey-23n7.10  | ZDB-GENE-141222-64   | si:dkey-23n7.10  |
| ENSDARG00000069335  | 58.73605119 | 0.760295069  | 0.152674623 | 4.979839189   | 6.36371E-07 | 6.39779E-05 | bcl6b            | ZDB-GENE-120907-1    | bcl6b            |
| ENSDARG00000052923  | 30.12429813 | 1.064148616  | 0.214174451 | 4.968606704   | 6.74357E-07 | 6.74284E-05 | zgc:113162       | ZDB-GENE-050522-530  | zgc:113162       |
| ENSDARG000000100792 | 1075.127895 | -1.18500843  | 0.238932296 | -4.959599223  | 7.06388E-07 | 7.02493E-05 | zgc:154142       | ZDB-GENE-070615-2    | zgc:154142       |
| ENSDARG00000040059  | 111.0650733 | -1.285918518 | 0.259682625 | -4.951885081  | 7.3498E-07  | 7.26998E-05 | gbp              | ZDB-GENE-990714-7    | gbp              |
| ENSDARG00000056885  | 289.2717808 | -0.778198546 | 0.157334129 | -4.946152176  | 7.56948E-07 | 7.44723E-05 | per1a            | ZDB-GENE-011220-1    | per1a            |
| ENSDARG00000097959  | 167.2246746 | -1.408575193 | 0.285131714 | -4.940086013  | 7.80881E-07 | 7.64184E-05 | si:dkey-248g15.3 | ZDB-GENE-131127-95   | si:dkey-248g15.3 |
| ENSDARG00000043394  | 29.15709852 | -0.99667796  | 0.201879314 | -4.936998947  | 7.93339E-07 | 7.72267E-05 | si:dkey-71h2.2   | ZDB-GENE-041014-145  | si:dkey-71h2.2   |
| ENSDARG00000077688  | 408.070716  | -1.055979482 | 0.215100896 | -4.90922866   | 9.14353E-07 | 8.85383E-05 | cpo              | ZDB-GENE-070619-6    | cpo              |
| ENSDARG00000078309  | 93.4031951  | -1.042852937 | 0.21253983  | -4.906623552  | 9.26576E-07 | 8.92521E-05 | fam83b           | ZDB-GENE-030131-7066 | fam83b           |
| ENSDARG00000043154  | 277.2062963 | -0.761679722 | 0.155783932 | -4.889334285  | 1.01178E-06 | 9.69513E-05 | ucp2             | ZDB-GENE-990708-8    | ucp2             |
| ENSDARG00000063229  | 158.5396273 | 0.641335894  | 0.131362362 | 4.882189125   | 1.04915E-06 | 0.000100011 | xpo1b            | ZDB-GENE-070530-6    | xpo1b            |
| ENSDARG00000099555  | 189.2022852 | -0.965723216 | 0.19906858  | -4.851208638  | 1.22711E-06 | 0.000116373 | foxo1a           | ZDB-GENE-061013-59   | foxo1a           |
| ENSDARG00000087641  | 52.46204428 | -0.800554608 | 0.165228142 | -4.845146818  | 1.26518E-06 | 0.000119368 | cdh26.2          | ZDB-GENE-100922-183  | cdh26.2          |
| ENSDARG00000033182  | 83.66549514 | -0.808179789 | 0.166854717 | -4.84361366   | 1.27499E-06 | 0.00011968  | arl4ab           | ZDB-GENE-030219-167  | arl4ab           |
| ENSDARG00000028507  | 704.107608  | -0.759593376 | 0.157179891 | -4.83263713   | 1.34736E-06 | 0.000125831 | itgb4            | ZDB-GENE-030131-7209 | itgb4            |
| ENSDARG00000086685  | 94.94352214 | -0.726419415 | 0.150719959 | -4.819663052  | 1.43801E-06 | 0.000133619 | trim63b          | ZDB-GENE-040426-1003 | trim63b          |
| ENSDARG000000105039 | 26.6577159  | -1.745551508 | 0.362668957 | -4.813071182  | 1.48628E-06 | 0.000137404 | phka1b           | ZDB-GENE-091204-81   | phka1b           |
| ENSDARG00000055342  | 77.25562655 | -0.992697824 | 0.206292938 | -4.81207857   | 1.49369E-06 | 0.000137404 | slc16a13         | ZDB-GENE-120907-2    | slc16a13         |
| ENSDARG00000079308  | 67.30386855 | -1.279714113 | 0.266104637 | -4.809063557  | 1.51639E-06 | 0.000138799 | tor3a            | ZDB-GENE-081104-165  | tor3a            |
| ENSDARG00000005799  | 113.8297985 | -0.548362076 | 0.114264066 | -4.799077233  | 1.59398E-06 | 0.000145179 | smim14           | ZDB-GENE-040426-22   | smim14           |
| ENSDARG00000034181  | 79.02328018 | -1.061516861 | 0.221357605 | -4.795484027  | 1.62283E-06 | 0.000147078 | esr2b            | ZDB-GENE-030116-1    | esr2b            |
| ENSDARG00000099819  | 616.3743753 | -0.809754034 | 0.168903123 | -4.794192202  | 1.63332E-06 | 0.000147303 | sb:cb1058        | ZDB-GENE-040108-9    | sb:cb1058        |
| ENSDARG00000054848  | 129.9964219 | -0.958868412 | 0.200090563 | -4.79217208   | 1.64985E-06 | 0.000148068 | pdk4             | ZDB-GENE-060503-754  | pdk4             |
| ENSDARG00000033614  | 118.464169  | -0.763437451 | 0.159512201 | -4.786075598  | 1.70074E-06 | 0.000151275 | rasgef1ba        | ZDB-GENE-030131-5783 | rasgef1ba        |
| ENSDARG000000103991 | 142.7446227 | -0.638207232 | 0.133350922 | -4.785922901  | 1.70203E-06 | 0.000151275 | sec14l1          | ZDB-GENE-040426-801  | sec14l1          |
| ENSDARG00000063905  | 60057.67386 | -0.395639395 | 0.082684043 | -4.784954658  | 1.71026E-06 | 0.000151276 | mt-co1           | ZDB-GENE-011205-14   | mt-co1           |
| ENSDARG00000088813  | 81.85010095 | -1.088196931 | 0.228080582 | -4.7711107305 | 1.83216E-06 | 0.000161283 | ppp1r3ab         | ZDB-GENE-050309-246  | ppp1r3ab         |
| ENSDARG00000036840  | 1102.30356  | -0.972677018 | 0.203946588 | -4.769273298  | 1.84892E-06 | 0.000161983 | krt15            | ZDB-GENE-040426-2931 | krt15            |
| ENSDARG00000070214  | 328.4396724 | -0.872145911 | 0.183181817 | -4.761094323  | 1.92546E-06 | 0.000167889 | slc41a1          | ZDB-GENE-030131-4700 | slc41a1          |
| ENSDARG00000069888  | 106.9338544 | -0.862183301 | 0.181880194 | -4.740391362  | 2.13306E-06 | 0.000185113 | cldna            | ZDB-GENE-010328-1    | cldna            |

|                     |             |              |             |              |             |             |                   |                      |                   |
|---------------------|-------------|--------------|-------------|--------------|-------------|-------------|-------------------|----------------------|-------------------|
| ENSDARG00000038321  | 112.5910405 | 1.100446887  | 0.232658369 | 4.729883096  | 2.24649E-06 | 0.000194042 | zgc:172053        | ZDB-GENE-080219-25   | zgc:172053        |
| ENSDARG00000014053  | 67.45986768 | -1.558159539 | 0.330632936 | -4.71265676  | 2.44508E-06 | 0.000210208 | olfm1b            | ZDB-GENE-040801-228  | olfm1b            |
| ENSDARG00000096739  | 414.1552786 | 0.769984223  | 0.163524562 | 4.708676258  | 2.49331E-06 | 0.000213358 | si:dkey-219e21.2  | ZDB-GENE-141215-26   | si:dkey-219e21.2  |
| ENSDARG00000056719  | 801.3403064 | -0.84987093  | 0.180740497 | -4.702161067 | 2.57422E-06 | 0.000219262 | slc6a19b          | ZDB-GENE-030131-4755 | slc6a19b          |
| ENSDARG00000026348  | 184.5826932 | 0.808614922  | 0.172608583 | 4.684673902  | 2.80406E-06 | 0.000237738 | csad              | ZDB-GENE-041114-36   | csad              |
| ENSDARG00000093237  | 7.954390689 | -3.504249904 | 0.748454735 | -4.681979735 | 2.84118E-06 | 0.00023978  | si:ch211-89o9.4   | ZDB-GENE-090313-134  | si:ch211-89o9.4   |
| ENSDARG00000033832  | 964.6956993 | -1.198344766 | 0.256951426 | -4.663701549 | 3.10572E-06 | 0.000260909 | ampd1             | ZDB-GENE-040426-1906 | ampd1             |
| ENSDARG00000012903  | 584.2446861 | -1.62042186  | 0.347719094 | -4.66014633  | 3.15985E-06 | 0.000264249 | slc34a2a          | ZDB-GENE-000524-1    | slc34a2a          |
| ENSDARG00000092885  | 21.33582157 | 19.61383095  | 4.221389703 | 4.64629715   | 3.37946E-06 | 0.000281336 | zgc:171977        | ZDB-GENE-070822-24   | zgc:171977        |
| ENSDARG00000058285  | 59.41922036 | -1.033258272 | 0.223070007 | -4.631991032 | 3.62166E-06 | 0.000300141 | cpt1b             | ZDB-GENE-041010-9    | cpt1b             |
| ENSDARG00000103211  | 32.76911106 | -0.992233684 | 0.215635795 | -4.601433105 | 4.19594E-06 | 0.000346174 | si:dkey-19b23.8   | ZDB-GENE-030131-4634 | si:dkey-19b23.8   |
| ENSDARG00000007241  | 130.3973389 | -0.92264963  | 0.200770485 | -4.595544165 | 4.31621E-06 | 0.000354508 | mycb              | ZDB-GENE-040426-780  | mycb              |
| ENSDARG00000068951  | 4.905756175 | 3.8151034    | 0.832624347 | 4.582022389  | 4.60501E-06 | 0.000376546 | si:ch211-219a15.4 | ZDB-GENE-060503-308  | si:ch211-219a15.4 |
| ENSDARG00000014554  | 311.5419292 | 0.790570415  | 0.173255174 | 4.563040718  | 5.0418E-06  | 0.000410438 | ppp1r3cb          | ZDB-GENE-040426-1733 | ppp1r3cb          |
| ENSDARG00000039093  | 1349.623767 | -0.496603208 | 0.108883526 | -4.560866346 | 5.0943E-06  | 0.000412885 | got1              | ZDB-GENE-040426-2003 | got1              |
| ENSDARG00000090903  | 94.82860882 | -0.998042498 | 0.219492085 | -4.547054614 | 5.44019E-06 | 0.000438985 | creb3l3b          | ZDB-GENE-131023-1    | creb3l3b          |
| ENSDARG00000002271  | 163.1787692 | -0.701481052 | 0.15445372  | -4.54169089  | 5.58048E-06 | 0.000448339 | zfand5b           | ZDB-GENE-040426-875  | zfand5b           |
| ENSDARG00000016143  | 127.8139121 | -0.657256274 | 0.144912167 | -4.535549271 | 5.74538E-06 | 0.00045958  | xiap              | ZDB-GENE-030825-7    | xiap              |
| ENSDARG00000090526  | 15.45662955 | 1.455000021  | 0.321589791 | 4.524397425  | 6.05678E-06 | 0.000482393 | zgc:158404        | ZDB-GENE-070112-592  | zgc:158404        |
| ENSDARG00000038639  | 20.44349338 | -1.966077106 | 0.435126531 | -4.518403192 | 6.23077E-06 | 0.000494111 | elovl6l           | ZDB-GENE-031110-3    | elovl6l           |
| ENSDARG00000044811  | 93.10199102 | -0.50283619  | 0.111400106 | -4.513785551 | 6.36806E-06 | 0.000502831 | cdk9              | ZDB-GENE-030131-321  | cdk9              |
| ENSDARG00000063435  | 84.29200412 | -0.712754666 | 0.158029052 | -4.510276166 | 6.47433E-06 | 0.000509037 | trpm4b.2          | ZDB-GENE-061214-2    | trpm4b.2          |
| ENSDARG00000030872  | 116.6550391 | -1.364683318 | 0.303437791 | -4.497407233 | 6.87872E-06 | 0.00053853  | cetp              | ZDB-GENE-041114-54   | cetp              |
| ENSDARG00000023082  | 78.51369721 | -1.595138209 | 0.354900662 | -4.49460477  | 6.96993E-06 | 0.000543359 | krt1-19d          | ZDB-GENE-060316-1    | krt1-19d          |
| ENSDARG00000006546  | 224.2435263 | 0.871052591  | 0.194056231 | 4.488660772  | 7.16723E-06 | 0.000556383 | ak4               | ZDB-GENE-040426-2505 | ak4               |
| ENSDARG00000093844  | 4462.054517 | -1.442256402 | 0.321659483 | -4.483798793 | 7.33258E-06 | 0.000566827 | zgc:136461        | ZDB-GENE-060519-7    | zgc:136461        |
| ENSDARG00000039832  | 41.00522451 | 1.49004171   | 0.332408351 | 4.482564011  | 7.37515E-06 | 0.000567732 | gsta.2            | ZDB-GENE-070822-30   | gsta.2            |
| ENSDARG00000061994  | 748.3631622 | -0.615699617 | 0.13825299  | -4.453427122 | 8.45104E-06 | 0.000647843 | acacb             | ZDB-GENE-060526-132  | acacb             |
| ENSDARG00000102756  | 5.518823894 | 3.013640379  | 0.677587985 | 4.447600085  | 8.6835E-06  | 0.000662901 | nr0b2b            | ZDB-GENE-080403-9    | nr0b2b            |
| ENSDARG00000086261  | 21.21834624 | -0.964607547 | 0.217457379 | -4.43584647  | 9.17112E-06 | 0.000693872 | fhdc4             | ZDB-GENE-131127-25   | fhdc4             |
| ENSDARG00000021787  | 173.4913099 | -1.146913447 | 0.25859104  | -4.435240472 | 9.19696E-06 | 0.000693872 | abcb5             | ZDB-GENE-030131-6414 | abcb5             |
| ENSDARG00000030604  | 41.90260072 | -0.886139472 | 0.199800814 | -4.435114412 | 9.20234E-06 | 0.000693872 | phkg1a            | ZDB-GENE-061103-385  | phkg1a            |
| ENSDARG00000116430  | 5.118997162 | -2.252303259 | 0.508792262 | -4.426763978 | 9.56573E-06 | 0.000717461 | si:ch73-329n5.2   | ZDB-GENE-131121-66   | si:ch73-329n5.2   |
| ENSDARG00000041959  | 51.59083009 | -0.970482632 | 0.219261356 | -4.426145355 | 9.59319E-06 | 0.000717461 | cxcr4b            | ZDB-GENE-010614-1    | cxcr4b            |
| ENSDARG00000043323  | 71.9522898  | -0.621987323 | 0.140932811 | -4.413360664 | 1.01778E-05 | 0.000758104 | lnx1              | ZDB-GENE-030131-9439 | lnx1              |
| ENSDARG00000063268  | 21.24186053 | -0.982203518 | 0.222785633 | -4.408738153 | 1.03975E-05 | 0.000771341 | SLC35G1           | ZDB-GENE-121214-166  | si:ch211-197g18.2 |
| ENSDARG00000000212  | 1252.390495 | -0.715515892 | 0.16234925  | -4.407263311 | 1.04685E-05 | 0.000773491 | krt97             | ZDB-GENE-040718-78   | krt97             |
| ENSDARG00000088524  | 4.051002146 | -3.671982859 | 0.833358962 | -4.406243918 | 1.05179E-05 | 0.00077402  | acot17            | ZDB-GENE-040426-2381 | acot17            |
| ENSDARG00000078041  | 162.1256787 | 0.630712561  | 0.14316866  | 4.405381473  | 1.05598E-05 | 0.00077402  | xpo1a             | ZDB-GENE-050309-201  | xpo1a             |
| ENSDARG00000017049  | 156.2836699 | -0.553536247 | 0.126025735 | -4.392247733 | 1.12185E-05 | 0.000817504 | adsl              | ZDB-GENE-030131-6363 | adsl              |
| ENSDARG00000098024  | 967.5811268 | -0.60626056  | 0.138043933 | -4.391794315 | 1.12419E-05 | 0.000817504 | si:dkey-262k9.2   | ZDB-GENE-131121-282  | si:dkey-262k9.2   |
| ENSDARG00000102435  | 18.71855072 | 1.234269687  | 0.282011328 | 4.376667049  | 1.20508E-05 | 0.000869647 | plekhf1           | ZDB-GENE-040426-1289 | plekhf1           |
| ENSDARG000000021494 | 404.0111755 | -0.562599452 | 0.128546613 | -4.376618234 | 1.20535E-05 | 0.000869647 | hnf4a             | ZDB-GENE-030131-1077 | hnf4a             |

|                    |             |              |             |              |             |             |                  |                      |                  |
|--------------------|-------------|--------------|-------------|--------------|-------------|-------------|------------------|----------------------|------------------|
| ENSDARG0000013236  | 129.5605399 | 1.0786954    | 0.246663125 | 4.373152256  | 1.22465E-05 | 0.000880123 | dhcr24           | ZDB-GENE-041212-73   | dhcr24           |
| ENSDARG0000029995  | 8993.102577 | -0.651948949 | 0.14914212  | -4.371326811 | 1.23494E-05 | 0.000884062 | tnni2b.2         | ZDB-GENE-040801-9    | tnni2b.2         |
| ENSDARG00000104172 | 587.6261748 | -1.873905006 | 0.429959214 | -4.358332008 | 1.31057E-05 | 0.000931626 | diabloa          | ZDB-GENE-040426-1303 | diabloa          |
| ENSDARG0000020645  | 132.314852  | -0.82211986  | 0.188638503 | -4.358176332 | 1.31151E-05 | 0.000931626 | slc7a3a          | ZDB-GENE-041114-206  | slc7a3a          |
| ENSDARG0000028322  | 154.4341073 | -0.488740761 | 0.112197746 | -4.356065782 | 1.32421E-05 | 0.000937031 | pex14            | ZDB-GENE-060130-169  | pex14            |
| ENSDARG00000092162 | 30.65475356 | 0.982656665  | 0.225889226 | 4.350170575  | 1.36032E-05 | 0.000958893 | mhc1zaa          | ZDB-GENE-030916-1    | mhc1zaa          |
| ENSDARG00000053761 | 17.19955178 | 1.209702973  | 0.278291163 | 4.34689683   | 1.38077E-05 | 0.000969597 | si:dkey-187j14.4 | ZDB-GENE-131119-26   | si:dkey-187j14.4 |
| ENSDARG00000032708 | 23.94890379 | -0.936821597 | 0.215691114 | -4.343348126 | 1.40327E-05 | 0.000981652 | arl4cb           | ZDB-GENE-040426-2382 | arl4cb           |
| ENSDARG00000055186 | 45.61122057 | -1.040087657 | 0.239568036 | -4.341512633 | 1.41505E-05 | 0.000986141 | ccr9a            | ZDB-GENE-060130-125  | ccr9a            |
| ENSDARG00000025671 | 37.36193141 | 0.912988579  | 0.210366532 | 4.339989693  | 1.42489E-05 | 0.000989253 | grm6b            | ZDB-GENE-021120-2    | grm6b            |
| ENSDARG00000043442 | 9.672388671 | -2.218966323 | 0.512179866 | -4.332396623 | 1.47495E-05 | 0.001020155 | zgc:153665       | ZDB-GENE-061027-365  | zgc:153665       |
| ENSDARG00000060051 | 123.0987004 | -0.736956209 | 0.170416256 | -4.324447831 | 1.52914E-05 | 0.001053371 | slc47a2.1        | ZDB-GENE-070112-1472 | slc47a2.1        |
| ENSDARG00000103642 | 2103.626207 | 1.706805955  | 0.394756982 | 4.323687819  | 1.53442E-05 | 0.001053371 | pglyrp6          | ZDB-GENE-071227-2    | pglyrp6          |
| ENSDARG00000028173 | 100.8387394 | -0.777648386 | 0.180021535 | -4.319751996 | 1.56205E-05 | 0.001068347 | slc4a2a          | ZDB-GENE-051101-2    | slc4a2a          |
| ENSDARG00000070484 | 185.8256424 | -0.816831888 | 0.189298861 | -4.315038578 | 1.59575E-05 | 0.001087356 | zgc:195001       | ZDB-GENE-081022-173  | zgc:195001       |
| ENSDARG00000103980 | 115.5619795 | -0.781680014 | 0.181845708 | -4.2985893   | 1.71889E-05 | 0.00116694  | ets2             | ZDB-GENE-050522-552  | ets2             |
| ENSDARG00000008835 | 5.383861129 | 17.08683111  | 3.976765671 | 4.296665312  | 1.73387E-05 | 0.001172782 | si:dkey-46g23.5  | ZDB-GENE-030131-9306 | si:dkey-46g23.5  |
| ENSDARG00000069498 | 13.38539347 | -1.226733551 | 0.285564167 | -4.295824516 | 1.74045E-05 | 0.001172925 | phkg1b           | ZDB-GENE-050522-52   | phkg1b           |
| ENSDARG00000011583 | 75.94517877 | -0.81834279  | 0.190650661 | -4.292367964 | 1.76778E-05 | 0.001186991 | cry1b            | ZDB-GENE-010426-3    | cry1b            |
| ENSDARG00000023058 | 71.12211815 | 0.541510411  | 0.126300549 | 4.287474723  | 1.80716E-05 | 0.001209022 | foxo3a           | ZDB-GENE-050116-1    | foxo3a           |
| ENSDARG00000028106 | 255.6589843 | 0.705571827  | 0.164775081 | 4.282029914  | 1.85196E-05 | 0.001234506 | glrx             | ZDB-GENE-041010-11   | glrx             |
| ENSDARG00000055412 | 43.67825506 | -1.025641665 | 0.240563453 | -4.263497437 | 2.01252E-05 | 0.00133669  | mylk4b           | ZDB-GENE-041001-128  | mylk4b           |
| ENSDARG00000005104 | 140.5162141 | -0.469559759 | 0.110755754 | -4.239596954 | 2.23921E-05 | 0.001481909 | limk2            | ZDB-GENE-040718-398  | limk2            |
| ENSDARG00000102048 | 50.30115692 | -0.780107781 | 0.184673306 | -4.224258493 | 2.39729E-05 | 0.001580835 | slc25a43         | ZDB-GENE-030616-69   | slc25a43         |
| ENSDARG00000076689 | 74.39031252 | 0.646856553  | 0.153338675 | 4.218482726  | 2.45952E-05 | 0.001616079 | gramd1a          | ZDB-GENE-060503-688  | gramd1a          |
| ENSDARG00000095486 | 5.762329285 | 24.39516378  | 5.798079387 | 4.207455978  | 2.58262E-05 | 0.001690925 | CU467646.2       |                      |                  |
| ENSDARG00000006837 | 35.2380218  | 0.851217429  | 0.20248913  | 4.203768518  | 2.62507E-05 | 0.001712628 | mycn             | ZDB-GENE-020711-1    | mycn             |
| ENSDARG00000045444 | 73.01851394 | 0.777034314  | 0.184950173 | 4.201317048  | 2.65367E-05 | 0.001720354 | fzd8a            | ZDB-GENE-000328-3    | fzd8a            |
| ENSDARG00000001950 | 1128.068685 | -0.561370828 | 0.133623114 | -4.201150623 | 2.65562E-05 | 0.001720354 | ak1              | ZDB-GENE-040822-37   | ak1              |
| ENSDARG00000089302 | 185.4494855 | 0.390279952  | 0.092975152 | 4.197680187  | 2.69663E-05 | 0.001736071 | hnrnpa0a         | ZDB-GENE-030131-2249 | hnrnpa0a         |
| ENSDARG00000016570 | 144.2095526 | -0.620636208 | 0.147858462 | -4.197502112 | 2.69875E-05 | 0.001736071 | prlra            | ZDB-GENE-080103-2    | prlra            |
| ENSDARG00000012789 | 30.43651427 | -0.870930896 | 0.208014319 | -4.186879539 | 2.82816E-05 | 0.001812978 | plek2            | ZDB-GENE-080219-2    | plek2            |
| ENSDARG00000028804 | 135.6242268 | -0.82348124  | 0.196853748 | -4.183213426 | 2.87417E-05 | 0.001836078 | ankrd9           | ZDB-GENE-041114-3    | ankrd9           |
| ENSDARG00000037551 | 122.8325767 | 1.093164939  | 0.261403709 | 4.181902938  | 2.89079E-05 | 0.001840305 | pm20d1.1         | ZDB-GENE-051120-102  | pm20d1.1         |
| ENSDARG00000001879 | 200.0146341 | -0.58425411  | 0.140192753 | -4.167505791 | 3.07951E-05 | 0.001953682 | nav2b            | ZDB-GENE-061207-13   | nav2b            |
| ENSDARG00000033140 | 19.26124149 | -1.159320001 | 0.279331333 | -4.150339984 | 3.31982E-05 | 0.002098901 | desi1a           | ZDB-GENE-040426-1657 | desi1a           |
| ENSDARG00000053961 | 42.8396183  | -0.91873304  | 0.221466153 | -4.148412864 | 3.34788E-05 | 0.002107919 | slc2a11a         | ZDB-GENE-080723-20   | slc2a11a         |
| ENSDARG00000016200 | 62.77172492 | -0.673855148 | 0.162461239 | -4.147790278 | 3.357E-05   | 0.002107919 | trib3            | ZDB-GENE-040426-2609 | trib3            |
| ENSDARG00000077726 | 86.0476517  | -1.171567119 | 0.283195123 | -4.136960789 | 3.51936E-05 | 0.002202355 | nocta            | ZDB-GENE-050208-306  | nocta            |
| ENSDARG00000090228 | 425.3730049 | 0.877518836  | 0.212270658 | 4.133962012  | 3.56562E-05 | 0.00223741  | gsta.1           | ZDB-GENE-040426-2720 | gsta.1           |
| ENSDARG00000035327 | 15014.56052 | -0.710772933 | 0.171988358 | -4.132680511 | 3.58557E-05 | 0.002228625 | ckma             | ZDB-GENE-980526-109  | ckma             |
| ENSDARG00000108535 | 253.628981  | -0.629840822 | 0.152473119 | -4.130831888 | 3.61453E-05 | 0.00223906  | CABZ01072077.1   |                      |                  |
| ENSDARG00000104470 | 89.02997551 | -0.717490987 | 0.173868702 | -4.126625317 | 3.68125E-05 | 0.002265759 | syng2b           | ZDB-GENE-070424-19   | syng2b           |

|                    |             |              |             |              |             |             |                   |                      |                   |
|--------------------|-------------|--------------|-------------|--------------|-------------|-------------|-------------------|----------------------|-------------------|
| ENSDARG00000045708 | 39.20718367 | 1.491308279  | 0.361392382 | 4.126562571  | 3.68226E-05 | 0.002265759 | adm2a             | ZDB-GENE-041210-100  | adm2a             |
| ENSDARG00000044642 | 501.2472026 | 1.121416233  | 0.271852975 | 4.125083542  | 3.706E-05   | 0.002272768 | sc5d              | ZDB-GENE-040912-56   | sc5d              |
| ENSDARG00000032618 | 63.10175182 | 0.710470954  | 0.172387441 | 4.121361462  | 3.7664E-05  | 0.002298298 | mgst1.1           | ZDB-GENE-041010-30   | mgst1.1           |
| ENSDARG00000022712 | 186.9385694 | 0.413501717  | 0.100340589 | 4.120981571  | 3.77262E-05 | 0.002298298 | stat3             | ZDB-GENE-980526-68   | stat3             |
| ENSDARG00000054978 | 175.347479  | 0.732237929  | 0.177794838 | 4.118443135  | 3.81441E-05 | 0.002316088 | kifc3             | ZDB-GENE-030131-3724 | kifc3             |
| ENSDARG00000057064 | 859.0098111 | -0.774305155 | 0.188645305 | -4.104555663 | 4.05093E-05 | 0.002449635 | enpep             | ZDB-GENE-050309-218  | enpep             |
| ENSDARG00000055514 | 80.7496699  | -0.880971064 | 0.214662467 | -4.103982757 | 4.06098E-05 | 0.002449635 | icn2              | ZDB-GENE-070822-9    | icn2              |
| ENSDARG00000098103 | 134.5789462 | -0.616529931 | 0.150603094 | -4.093740127 | 4.2447E-05  | 0.002552091 | tefb              | ZDB-GENE-050522-224  | tefb              |
| ENSDARG00000013623 | 3238.876094 | -0.383293023 | 0.093759259 | -4.088055162 | 4.35005E-05 | 0.002606911 | vdac2             | ZDB-GENE-030131-845  | vdac2             |
| ENSDARG00000006588 | 1011.927339 | 0.731109296  | 0.178908781 | 4.086491957  | 4.37945E-05 | 0.002613067 | zgc:111983        | ZDB-GENE-050417-335  | zgc:111983        |
| ENSDARG00000112575 | 43.94659766 | -1.050649702 | 0.257134    | -4.08600069  | 4.38872E-05 | 0.002613067 | CU467905.1        |                      |                   |
| ENSDARG00000019541 | 697.8367496 | -0.481591091 | 0.118014939 | -4.080763811 | 4.4888E-05  | 0.002664027 | gpt2l             | ZDB-GENE-050302-11   | gpt2l             |
| ENSDARG00000025855 | 27.64847373 | -0.95562822  | 0.234931283 | -4.067692505 | 4.7481E-05  | 0.002806762 | camk2n1a          | ZDB-GENE-050522-319  | camk2n1a          |
| ENSDARG00000102335 | 45.75827611 | -0.870710105 | 0.214085267 | -4.067118284 | 4.75981E-05 | 0.002806762 | ano1              | ZDB-GENE-121127-3    | ano1              |
| ENSDARG00000036135 | 301.9568294 | -0.804083098 | 0.197780225 | -4.065538397 | 4.79217E-05 | 0.002816816 | bbox1             | ZDB-GENE-050417-218  | bbox1             |
| ENSDARG00000063917 | 17046.20636 | -0.40462594  | 0.099592952 | -4.062796921 | 4.84882E-05 | 0.002841039 | mt-nd4            | ZDB-GENE-011205-10   | mt-nd4            |
| ENSDARG00000039974 | 67.51163537 | 0.501566272  | 0.123488393 | 4.061647083  | 4.87277E-05 | 0.002846007 | rai14             | ZDB-GENE-040718-235  | rai14             |
| ENSDARG00000041294 | 44.08006646 | 0.913296461  | 0.2249776   | 4.059499534  | 4.9178E-05  | 0.002863218 | noxo1a            | ZDB-GENE-030131-9700 | noxo1a            |
| ENSDARG00000007753 | 14.15672699 | 1.05758721   | 0.26092905  | 4.053160092  | 5.05304E-05 | 0.002932676 | cpne2             | ZDB-GENE-030131-7896 | cpne2             |
| ENSDARG00000019808 | 212.9613834 | -1.048598505 | 0.258905732 | -4.050116993 | 5.1192E-05  | 0.002961733 | evpla             | ZDB-GENE-030829-19   | evpla             |
| ENSDARG00000076043 | 195.1909305 | 3.058773437  | 0.755455976 | 4.04891024   | 5.14567E-05 | 0.002967711 | si:dkeyp-73d8.9   | ZDB-GENE-070912-685  | si:dkeyp-73d8.9   |
| ENSDARG00000039211 | 1714.649052 | -0.640159913 | 0.158151694 | -4.04775882  | 5.17104E-05 | 0.002973024 | zgc:77439         | ZDB-GENE-031010-24   | zgc:77439         |
| ENSDARG00000101043 | 649.4205147 | -0.717275004 | 0.17740927  | -4.043052558 | 5.27598E-05 | 0.003023908 | ppl               | ZDB-GENE-041008-196  | ppl               |
| ENSDARG00000115817 | 13.85680544 | 23.40712735  | 5.793002698 | 4.040586302  | 5.33177E-05 | 0.003046397 | si:dkey-46g23.2   | ZDB-GENE-070705-476  | si:dkey-46g23.2   |
| ENSDARG00000088087 | 692.080737  | -0.477892202 | 0.11831166  | -4.039265464 | 5.36189E-05 | 0.003054117 | kdm6ba            | ZDB-GENE-091005-1    | kdm6ba            |
| ENSDARG00000099776 | 551.4279428 | -0.859534123 | 0.213138662 | -4.032746167 | 5.51288E-05 | 0.003130432 | glula             | ZDB-GENE-030131-688  | glula             |
| ENSDARG00000095400 | 18.25202848 | -1.028585004 | 0.255229003 | -4.030047496 | 5.57656E-05 | 0.003153112 | si:ch73-52f15.5   | ZDB-GENE-091204-341  | si:ch73-52f15.5   |
| ENSDARG00000058218 | 190.7421744 | 0.726989254  | 0.180412104 | 4.029603552  | 5.5871E-05  | 0.003153112 | fam151a           | ZDB-GENE-070705-105  | fam151a           |
| ENSDARG00000062788 | 33.96279158 | 2.693809695  | 0.668770218 | 4.028004872  | 5.62522E-05 | 0.003164916 | irg1l             | ZDB-GENE-061103-301  | irg1l             |
| ENSDARG00000052244 | 402.8425494 | 0.281230327  | 0.07028294  | 4.001402399  | 6.29682E-05 | 0.003530207 | zgc:158564        | ZDB-GENE-070112-1662 | zgc:158564        |
| ENSDARG00000035835 | 216.6337969 | -0.452854142 | 0.113190877 | -4.000800727 | 6.31285E-05 | 0.003530207 | eef2k             | ZDB-GENE-020916-2    | eef2k             |
| ENSDARG00000041359 | 61.13014717 | 0.495619573  | 0.123906328 | 3.999953699  | 6.33549E-05 | 0.00353213  | zgc:161969        | ZDB-GENE-030131-2597 | zgc:161969        |
| ENSDARG00000075017 | 61.13548985 | -0.778445542 | 0.194847007 | -3.995162936 | 6.46498E-05 | 0.003588457 | myzap             | ZDB-GENE-041111-91   | myzap             |
| ENSDARG00000017773 | 148.2050493 | -0.758601174 | 0.189898274 | -3.994776566 | 6.47553E-05 | 0.003588457 | slc16a12a         | ZDB-GENE-080721-24   | slc16a12a         |
| ENSDARG00000002293 | 3.556198957 | -1.985458329 | 0.49798472  | -3.986986448 | 6.69178E-05 | 0.003697161 | si:ch211-197g15.6 | ZDB-GENE-050208-457  | si:ch211-197g15.6 |
| ENSDARG00000099111 | 336.2677583 | -0.791862198 | 0.198822906 | -3.982751346 | 6.8122E-05  | 0.003752422 | zgc:175280        | ZDB-GENE-080219-39   | zgc:175280        |
| ENSDARG00000079946 | 210.1461034 | 1.585622404  | 0.399065244 | 3.973341275  | 7.08714E-05 | 0.003892215 | sqlea             | ZDB-GENE-071004-98   | sqlea             |
| ENSDARG00000069459 | 4.986634463 | -1.527530408 | 0.385088731 | -3.966697245 | 7.28755E-05 | 0.003990366 | si:dkey-6n21.13   | ZDB-GENE-160728-54   | si:dkey-6n21.13   |
| ENSDARG00000033160 | 498.1319466 | -0.615769272 | 0.155651822 | -3.956068508 | 7.61933E-05 | 0.004148659 | nr1d1             | ZDB-GENE-050105-1    | nr1d1             |
| ENSDARG00000012833 | 42.49523451 | -0.863804466 | 0.218353377 | -3.955993167 | 7.62173E-05 | 0.004148659 | foxn3             | ZDB-GENE-060512-39   | foxn3             |
| ENSDARG00000063912 | 29288.28351 | -0.37058043  | 0.093768098 | -3.952094973 | 7.747E-05   | 0.004204403 | mt-co3            | ZDB-GENE-011205-16   | mt-co3            |
| ENSDARG00000060668 | 32.31206977 | 0.642995616  | 0.163156069 | 3.940984977  | 8.11477E-05 | 0.004391046 | tm4sf18           | ZDB-GENE-050208-690  | tm4sf18           |
| ENSDARG00000099757 | 23.86613728 | -0.929064357 | 0.236130929 | -3.934530558 | 8.33595E-05 | 0.0044975   | wdr47b            | ZDB-GENE-121114-10   | wdr47b            |



|                    |             |              |             |              |             |             |                   |                      |                   |
|--------------------|-------------|--------------|-------------|--------------|-------------|-------------|-------------------|----------------------|-------------------|
| ENSDARG00000034105 | 131.4916812 | -0.589936605 | 0.150054664 | -3.931477966 | 8.44252E-05 | 0.004541683 | mtus1b            | ZDB-GENE-070619-5    | mtus1b            |
| ENSDARG00000058322 | 77.48477465 | -0.531440522 | 0.135271024 | -3.928709231 | 8.5403E-05  | 0.004580889 | enc3              | ZDB-GENE-030131-5742 | enc3              |
| ENSDARG00000054609 | 243.3966397 | -0.576456259 | 0.146800043 | -3.926812597 | 8.6079E-05  | 0.004603725 | slco2b1           | ZDB-GENE-051023-6    | slco2b1           |
| ENSDARG00000040565 | 18352.84411 | -0.688885485 | 0.175554216 | -3.924061177 | 8.70686E-05 | 0.004643154 | ckmb              | ZDB-GENE-040426-2128 | ckmb              |
| ENSDARG00000086272 | 10.44936076 | -1.307740178 | 0.333574059 | -3.92038932  | 8.8406E-05  | 0.00470085  | si:dkey-4p15.5    | ZDB-GENE-121214-193  | si:dkey-4p15.5    |
| ENSDARG00000030087 | 470.5393524 | -0.611199239 | 0.155949132 | -3.919221813 | 8.88353E-05 | 0.004710065 | nfkbb             | ZDB-GENE-070705-529  | nfkbb             |
| ENSDARG00000076127 | 5.959040061 | -1.698707584 | 0.434036889 | -3.913740119 | 9.08774E-05 | 0.004804492 | gabbr1            | ZDB-GENE-090313-230  | gabbr1            |
| ENSDARG00000078473 | 226.5966663 | 0.556959101  | 0.1424263   | 3.910507404  | 9.21024E-05 | 0.004855303 | nucks1a           | ZDB-GENE-040912-175  | nucks1a           |
| ENSDARG00000046098 | 121.6148152 | 1.510459334  | 0.387965481 | 3.893282798  | 9.88968E-05 | 0.005198578 | ebp               | ZDB-GENE-040718-12   | ebp               |
| ENSDARG00000031776 | 472.6294159 | 0.724091226  | 0.186141184 | 3.890010851  | 0.00010024  | 0.005252912 | fthl27            | ZDB-GENE-040718-72   | fthl27            |
| ENSDARG00000090900 | 109.6971046 | -1.279157826 | 0.328884922 | -3.889378137 | 0.000100501 | 0.005252912 | apnl              | ZDB-GENE-030131-8907 | apnl              |
| ENSDARG00000092551 | 5.668152371 | -2.518899088 | 0.648700946 | -3.882989691 | 0.00010318  | 0.005377633 | si:dkey-56e3.2    | ZDB-GENE-090313-316  | si:dkey-56e3.2    |
| ENSDARG00000055876 | 923.3286756 | 1.15214224   | 0.297159934 | 3.877178949  | 0.000105675 | 0.005492096 | msmo1             | ZDB-GENE-040426-2670 | msmo1             |
| ENSDARG00000052783 | 113.2932589 | 0.588916777  | 0.152160593 | 3.870363318  | 0.000108673 | 0.005632031 | cdc42ep3          | ZDB-GENE-040912-89   | cdc42ep3          |
| ENSDARG00000101362 | 68.95832242 | -0.804493244 | 0.208060255 | -3.866635862 | 0.000110347 | 0.005702708 | mibp              | ZDB-GENE-030404-1    | mibp              |
| ENSDARG00000077040 | 45.65391189 | -0.567706085 | 0.147119494 | -3.85880939  | 0.000113941 | 0.005871939 | si:ch211-85n16.4  | ZDB-GENE-030131-7043 | si:ch211-85n16.4  |
| ENSDARG00000075282 | 139.543891  | -0.756080907 | 0.196012158 | -3.85731638  | 0.000114639 | 0.005891406 | irs2b             | ZDB-GENE-081104-462  | irs2b             |
| ENSDARG00000038524 | 917.2853691 | -0.467343266 | 0.121327353 | -3.851920072 | 0.000117195 | 0.005998821 | pik3r1            | ZDB-GENE-030131-1280 | pik3r1            |
| ENSDARG00000075854 | 9.748358391 | -1.172797989 | 0.304501655 | -3.851532402 | 0.000117381 | 0.005998821 | cx34.4            | ZDB-GENE-040406-3    | cx34.4            |
| ENSDARG00000088762 | 7.59543125  | -1.481827713 | 0.384847126 | -3.850432062 | 0.00011791  | 0.006009145 | si:ch211-224l10.4 | ZDB-GENE-090312-125  | si:ch211-224l10.4 |
| ENSDARG00000002988 | 66.98560687 | -0.996848528 | 0.259087519 | -3.847535892 | 0.000119312 | 0.006063808 | tnnt2d            | ZDB-GENE-050626-97   | tnnt2d            |
| ENSDARG00000020086 | 28.33893851 | -0.87454322  | 0.227399098 | -3.845851757 | 0.000120134 | 0.006088794 | nuak1a            | ZDB-GENE-041210-122  | nuak1a            |
| ENSDARG00000077301 | 197.3617269 | -0.690949927 | 0.179751443 | -3.843918674 | 0.000121085 | 0.006110505 | mlf1              | ZDB-GENE-080917-7    | mlf1              |
| ENSDARG00000090814 | 48.20103479 | -0.946378168 | 0.246219799 | -3.843631472 | 0.000121227 | 0.006110505 | si:dkey-18a10.3   | ZDB-GENE-091204-174  | si:dkey-18a10.3   |
| ENSDARG00000115257 | 18.9305605  | 1.571095644  | 0.409818894 | 3.833633992  | 0.000126264 | 0.006347007 | si:ch73-338o16.4  | ZDB-GENE-131119-14   | si:ch73-338o16.4  |
| ENSDARG00000070434 | 21.36927845 | 0.819287851  | 0.213848478 | 3.831160542  | 0.00012754  | 0.006393693 | rhov              | ZDB-GENE-031002-10   | rhov              |
| ENSDARG00000013856 | 7064.840046 | 0.906598473  | 0.236811023 | 3.828362643  | 0.000128999 | 0.006449228 | amy2a             | ZDB-GENE-040426-2393 | amy2a             |
| ENSDARG00000071429 | 1199.382853 | -0.490648936 | 0.128390976 | -3.821521963 | 0.000132631 | 0.006612839 | tdo2a             | ZDB-GENE-030131-1187 | tdo2a             |
| ENSDARG00000051956 | 61.9025332  | -0.54638509  | 0.143048731 | -3.819573125 | 0.000133683 | 0.006647288 | isca1             | ZDB-GENE-050626-94   | isca1             |
| ENSDARG00000091061 | 387.079194  | -0.578110106 | 0.15143531  | -3.817538358 | 0.00013479  | 0.006684268 | slc38a3b          | ZDB-GENE-121120-3    | slc38a3b          |
| ENSDARG00000077540 | 20.1207012  | 1.088548892  | 0.285316069 | 3.815238639  | 0.000136051 | 0.006711816 | f2rl1.2           | ZDB-GENE-070615-24   | f2rl1.2           |
| ENSDARG00000076830 | 215.6169605 | -1.625870275 | 0.426156438 | -3.815195849 | 0.000136075 | 0.006711816 | si:dkey-65b12.6   | ZDB-GENE-060526-329  | si:dkey-65b12.6   |
| ENSDARG00000020258 | 194.3883028 | 0.433324782  | 0.113618651 | 3.81385255   | 0.000136817 | 0.006730378 | ewsr1a            | ZDB-GENE-030131-2317 | ewsr1a            |
| ENSDARG00000045414 | 2233.201505 | 0.759741775  | 0.199392683 | 3.810279113  | 0.00013881  | 0.006810203 | elovl2            | ZDB-GENE-060421-5612 | elovl2            |
| ENSDARG00000037398 | 13.82232233 | -1.282601662 | 0.336698394 | -3.809348914 | 0.000139333 | 0.006817693 | zgc:113229        | ZDB-GENE-050417-475  | zgc:113229        |
| ENSDARG00000054510 | 66.80564781 | -0.734176985 | 0.192824183 | -3.807494341 | 0.000140382 | 0.006848749 | adrb2b            | ZDB-GENE-070410-32   | adrb2b            |
| ENSDARG00000062460 | 64.43505207 | -0.518195198 | 0.136146956 | -3.806146038 | 0.000141149 | 0.006848749 | sgk3              | ZDB-GENE-070424-62   | sgk3              |
| ENSDARG00000034470 | 1706.75835  | -0.56048952  | 0.147265328 | -3.805984249 | 0.000141241 | 0.006848749 | aldoab            | ZDB-GENE-040426-2299 | aldoab            |
| ENSDARG00000069630 | 882.3899949 | 0.650256584  | 0.170891936 | 3.805074714  | 0.000141761 | 0.006848749 | tat               | ZDB-GENE-030131-1144 | tat               |
| ENSDARG00000098375 | 267.3144557 | -0.445990907 | 0.117213146 | -3.804956362 | 0.000141829 | 0.006848749 | polr1a            | ZDB-GENE-030131-5286 | polr1a            |
| ENSDARG00000046012 | 157.4170944 | -0.679044297 | 0.17904155  | -3.792663204 | 0.00014904  | 0.007178121 | slc47a1           | ZDB-GENE-050327-20   | slc47a1           |
| ENSDARG00000078638 | 15.44667221 | 18.54358324  | 4.903093665 | 3.782016928  | 0.000155563 | 0.0074727   | zgc:171750        | ZDB-GENE-071004-30   | zgc:171750        |
| ENSDARG00000075369 | 68.10259394 | 0.446603586  | 0.118178711 | 3.779052784  | 0.000157426 | 0.007542512 | nck1b             | ZDB-GENE-090317-1    | nck1b             |

|                     |             |              |             |              |             |             |                   |                      |                   |
|---------------------|-------------|--------------|-------------|--------------|-------------|-------------|-------------------|----------------------|-------------------|
| ENSDARG00000041797  | 1278.06918  | -0.485078934 | 0.128409747 | -3.777586565 | 0.000158355 | 0.007567335 | cx28.9            | ZDB-GENE-041114-200  | cx28.9            |
| ENSDARG00000067851  | 57.08642536 | -0.749979086 | 0.199148179 | -3.765934951 | 0.000165927 | 0.007908613 | lcn15             | ZDB-GENE-060825-349  | lcn15             |
| ENSDARG00000027611  | 169.1033194 | -0.447086089 | 0.118889756 | -3.760509771 | 0.000169567 | 0.00804099  | cavin2a           | ZDB-GENE-090313-215  | cavin2a           |
| ENSDARG000000094112 | 79.60357397 | -0.525487492 | 0.139738968 | -3.76049357  | 0.000169578 | 0.00804099  | slc22a21          | ZDB-GENE-091118-62   | slc22a21          |
| ENSDARG00000054160  | 28.76743761 | 1.016843766  | 0.270666043 | 3.756820608  | 0.000172086 | 0.008138905 | zgc:113625        | ZDB-GENE-050320-47   | zgc:113625        |
| ENSDARG00000063921  | 15872.43767 | -0.439025365 | 0.116932609 | -3.754516116 | 0.000173677 | 0.008193086 | mt-nd5            | ZDB-GENE-011205-12   | mt-nd5            |
| ENSDARG00000054937  | 43.74539169 | -0.569090522 | 0.15160653  | -3.75373357  | 0.00017422  | 0.008197699 | badb              | ZDB-GENE-000616-1    | badb              |
| ENSDARG00000079416  | 49.8269868  | -1.132855253 | 0.302090701 | -3.750050068 | 0.000176799 | 0.008297839 | zgc:174895        | ZDB-GENE-070928-41   | zgc:174895        |
| ENSDARG00000092872  | 43.1242304  | -0.759753076 | 0.202893093 | -3.744598028 | 0.000180683 | 0.008458531 | upk3b             | ZDB-GENE-060526-348  | upk3b             |
| ENSDARG00000074248  | 15.0397035  | -0.900724942 | 0.240670817 | -3.74255987  | 0.000182155 | 0.008505812 | tmem237b          | ZDB-GENE-040912-63   | tmem237b          |
| ENSDARG00000074120  | 83.14815919 | -0.688141488 | 0.183922333 | -3.741478692 | 0.000182941 | 0.0085107   | usp2b             | ZDB-GENE-100208-2    | usp2b             |
| ENSDARG00000070964  | 239.3365322 | 1.03165706   | 0.27575983  | 3.741143372  | 0.000183185 | 0.0085107   | si:rp71-15k1.1    | ZDB-GENE-030131-1113 | si:rp71-15k1.1    |
| ENSDARG00000012199  | 111.2853656 | -0.713233376 | 0.190704818 | -3.739986135 | 0.00018403  | 0.008528442 | gpt2              | ZDB-GENE-030729-8    | gpt2              |
| ENSDARG00000032272  | 16.59558397 | -0.897979887 | 0.240455896 | -3.734488955 | 0.000188097 | 0.008694228 | sat1b             | ZDB-GENE-041001-39   | sat1b             |
| ENSDARG00000079745  | 375.7145657 | -0.419923924 | 0.112463178 | -3.73387922  | 0.000188553 | 0.008694228 | si:ch211-166a6.5  | ZDB-GENE-030131-9913 | si:ch211-166a6.5  |
| ENSDARG00000070542  | 73.1423772  | -0.724778563 | 0.194273931 | -3.73070416  | 0.000190945 | 0.008782531 | mafbb             | ZDB-GENE-010605-4    | mafbb             |
| ENSDARG00000059923  | 76.58200978 | -0.602969456 | 0.161674532 | -3.729526536 | 0.00019184  | 0.008801672 | slc25a47a         | ZDB-GENE-060616-266  | slc25a47a         |
| ENSDARG00000044601  | 1236.869207 | -0.317756623 | 0.085254116 | -3.727170468 | 0.000193641 | 0.008862229 | rtn4a             | ZDB-GENE-030710-1    | rtn4a             |
| ENSDARG00000003411  | 30.15854096 | -0.814441659 | 0.218698485 | -3.724038879 | 0.000196061 | 0.008950682 | foxa2             | ZDB-GENE-980526-404  | foxa2             |
| ENSDARG00000009242  | 14.38497049 | -1.000819245 | 0.269941063 | -3.707547242 | 0.000209276 | 0.009521881 | fev               | ZDB-GENE-070112-1852 | fev               |
| ENSDARG00000095434  | 14.43394992 | -1.467885013 | 0.395984998 | -3.706920773 | 0.000209795 | 0.009521881 | si:ch211-217k17.8 | ZDB-GENE-031010-46   | si:ch211-217k17.8 |
| ENSDARG00000056141  | 226.4510902 | -0.39336476  | 0.106128162 | -3.706506843 | 0.000210138 | 0.009521881 | coq10b            | ZDB-GENE-050417-263  | coq10b            |
| ENSDARG00000020893  | 392.0596123 | 0.340695526  | 0.091943761 | 3.70547739   | 0.000210993 | 0.009521881 | slc25a55a         | ZDB-GENE-040426-2745 | slc25a55a         |
| ENSDARG00000098663  | 16.1497657  | -4.366856471 | 1.178550794 | -3.705276424 | 0.00021116  | 0.009521881 | fgf19             | ZDB-GENE-030729-32   | fgf19             |
| ENSDARG00000023176  | 338.43088   | -1.068223653 | 0.288374592 | -3.704291856 | 0.000211982 | 0.009535566 | tdo2b             | ZDB-GENE-030131-6014 | tdo2b             |
| ENSDARG00000078619  | 539.8285291 | -0.970697928 | 0.262727933 | -3.694688704 | 0.000220156 | 0.009879113 | pnp5a             | ZDB-GENE-040426-2553 | pnp5a             |
| ENSDARG00000078430  | 81.92267717 | -0.587279872 | 0.159070409 | -3.69194921  | 0.000222542 | 0.009961864 | tiam1a            | ZDB-GENE-080325-1    | tiam1a            |
| ENSDARG00000019417  | 59.63933557 | -0.976327243 | 0.26464591  | -3.689183197 | 0.000224975 | 0.010046343 | gadd45ga          | ZDB-GENE-040426-1882 | gadd45ga          |
| ENSDARG00000022615  | 167.3912952 | -0.935772254 | 0.254352899 | -3.679031209 | 0.000234122 | 0.010429466 | si:ch211-241e1.3  | ZDB-GENE-030131-230  | si:ch211-241e1.3  |
| ENSDARG00000007264  | 50.85467298 | -0.654558084 | 0.178060077 | -3.676051901 | 0.000236871 | 0.010526471 | nipsnap2          | ZDB-GENE-991008-18   | nipsnap2          |
| ENSDARG00000076381  | 306.7560263 | -0.479838173 | 0.130693522 | -3.671476335 | 0.000241153 | 0.010690941 | slc25a1b          | ZDB-GENE-130114-1    | slc25a1b          |
| ENSDARG00000036636  | 27.29801382 | 0.979562544  | 0.267879034 | 3.656734645  | 0.000255449 | 0.011297459 | ebpl              | ZDB-GENE-030616-542  | ebpl              |
| ENSDARG00000086283  | 58.83684127 | -0.665720921 | 0.182092323 | -3.655952711 | 0.000256229 | 0.011304781 | cnsta             | ZDB-GENE-120917-3    | cnsta             |
| ENSDARG00000003869  | 122.8734465 | -0.380743097 | 0.104232308 | -3.652831875 | 0.000259364 | 0.011415741 | decr1             | ZDB-GENE-040718-142  | decr1             |
| ENSDARG00000041787  | 662.8261113 | -0.532391991 | 0.145835999 | -3.650621208 | 0.000261607 | 0.011486974 | cx32.3            | ZDB-GENE-030131-1337 | cx32.3            |
| ENSDARG00000061143  | 51.58305062 | -0.536563192 | 0.14701821  | -3.64963764  | 0.00026261  | 0.01150359  | tapt1b            | ZDB-GENE-030131-4025 | tapt1b            |
| ENSDARG00000014966  | 50.86910958 | 0.501801296  | 0.137655274 | 3.645347402  | 0.000267031 | 0.011669438 | ccdc82            | ZDB-GENE-030131-5749 | ccdc82            |
| ENSDARG00000028517  | 54.84244944 | -0.802918651 | 0.221191852 | -3.629964867 | 0.00028346  | 0.012358041 | hbp1              | ZDB-GENE-050522-414  | hbp1              |
| ENSDARG00000023958  | 22.04264591 | 0.673524356  | 0.185654344 | 3.627840541  | 0.000285802 | 0.012430684 | rnf181            | ZDB-GENE-040426-1024 | rnf181            |
| ENSDARG00000028017  | 83.36313864 | -1.296449322 | 0.357638885 | -3.625023387 | 0.000288935 | 0.012537339 | tp53inp1          | ZDB-GENE-031018-3    | tp53inp1          |
| ENSDARG00000059166  | 37.14749392 | -0.676562024 | 0.186710596 | -3.623586653 | 0.000290546 | 0.012577557 | slc22a13b         | ZDB-GENE-061013-532  | slc22a13b         |
| ENSDARG00000011240  | 19.64636802 | -1.537196553 | 0.424302461 | -3.622879179 | 0.000291342 | 0.012582415 | dhrs13a.2         | ZDB-GENE-040912-69   | dhrs13a.2         |
| ENSDARG000000091574 | 130.1900112 | -0.415019076 | 0.114708368 | -3.618036636 | 0.000296846 | 0.012790117 | suox              | ZDB-GENE-070718-3    | suox              |

|                     |             |              |             |              |             |             |                   |                      |                   |
|---------------------|-------------|--------------|-------------|--------------|-------------|-------------|-------------------|----------------------|-------------------|
| ENSDARG00000036414  | 495.7396749 | -0.519641499 | 0.143707856 | -3.615957504 | 0.000299239 | 0.012863102 | si:ch73-335i21.1  | ZDB-GENE-130530-591  | si:ch73-335i21.1  |
| ENSDARG00000055118  | 175.969061  | -0.641575404 | 0.177509235 | -3.614321272 | 0.000301135 | 0.01291443  | mylipb            | ZDB-GENE-061027-67   | mylipb            |
| ENSDARG00000013775  | 66.52026203 | -0.687280574 | 0.19030023  | -3.611559348 | 0.000304361 | 0.013022421 | si:dkey-246g23.4  | ZDB-GENE-050419-234  | si:dkey-246g23.4  |
| ENSDARG00000018921  | 32.75222668 | -0.684894099 | 0.189848538 | -3.607581636 | 0.000309064 | 0.013192959 | fam84a            | ZDB-GENE-040426-1247 | fam84a            |
| ENSDARG000000061120 | 2356.158144 | -0.630931297 | 0.174962205 | -3.606100518 | 0.000310833 | 0.013237735 | slc43a2b          | ZDB-GENE-041212-6    | slc43a2b          |
| ENSDARG00000044365  | 329.8302318 | 0.670807002  | 0.186316594 | 3.600361012  | 0.000317776 | 0.013502163 | angptl3           | ZDB-GENE-010817-3    | angptl3           |
| ENSDARG00000010572  | 306.5762937 | -1.070895493 | 0.297868639 | -3.595193835 | 0.00032415  | 0.013733466 | slc25a25a         | ZDB-GENE-040426-2396 | slc25a25a         |
| ENSDARG00000038583  | 150.7398641 | -0.659748914 | 0.183531611 | -3.594742677 | 0.000324712 | 0.013733466 | abraa             | ZDB-GENE-120730-1    | abraa             |
| ENSDARG00000056587  | 22.98020697 | -1.333080102 | 0.371311314 | -3.590195217 | 0.00033043  | 0.013920663 | cyp2r1            | ZDB-GENE-110114-1    | cyp2r1            |
| ENSDARG00000094041  | 498.6125317 | -0.625183548 | 0.17414483  | -3.59002072  | 0.000330652 | 0.013920663 | krt17             | ZDB-GENE-060503-86   | krt17             |
| ENSDARG00000078280  | 3.186396629 | -2.936865955 | 0.819010736 | -3.585869911 | 0.000335956 | 0.01410235  | nkx3-1            | ZDB-GENE-081104-238  | nkx3-1            |
| ENSDARG00000012972  | 366.6342714 | -0.458627298 | 0.127913532 | -3.585447843 | 0.0003365   | 0.01410235  | cfll1             | ZDB-GENE-040426-2770 | cfll1             |
| ENSDARG00000006601  | 38.04636147 | 0.583597883  | 0.162997831 | 3.580402762  | 0.000343065 | 0.014344795 | kaznb             | ZDB-GENE-061215-31   | kaznb             |
| ENSDARG00000042641  | 1220.751735 | 1.206981865  | 0.338071392 | 3.570198167  | 0.000356711 | 0.014881573 | cyp51             | ZDB-GENE-040625-2    | cyp51             |
| ENSDARG00000041602  | 42.29408662 | -0.533587355 | 0.14954634  | -3.568040223 | 0.000359661 | 0.014970698 | zgc:92335         | ZDB-GENE-040718-152  | zgc:92335         |
| ENSDARG00000095005  | 11.38085897 | 1.465124528  | 0.410837928 | 3.566186146  | 0.000362214 | 0.015042925 | si:dkey-21e2.10   | ZDB-GENE-050208-778  | si:dkey-21e2.10   |
| ENSDARG00000060435  | 17.50891289 | -0.874834899 | 0.245544634 | -3.562834523 | 0.000366872 | 0.01520205  | bnip1             | ZDB-GENE-060503-81   | bnip1             |
| ENSDARG00000092660  | 51.32585935 | 0.64069729   | 0.17987148  | 3.561972632  | 0.000368079 | 0.015217782 | cyp27c1           | ZDB-GENE-080204-68   | cyp27c1           |
| ENSDARG00000008019  | 10.89456247 | -2.509352187 | 0.708834392 | -3.540110661 | 0.000399959 | 0.016484572 | mxg               | ZDB-GENE-030721-10   | mxg               |
| ENSDARG00000033307  | 277.0415221 | -0.56221206  | 0.158828327 | -3.539746784 | 0.000400511 | 0.016484572 | igf2b             | ZDB-GENE-030131-2935 | igf2b             |
| ENSDARG00000079104  | 53.51861546 | 0.430556867  | 0.121843572 | 3.533685524  | 0.000409808 | 0.016829585 | mfhas1            | ZDB-GENE-080917-20   | mfhas1            |
| ENSDARG00000060498  | 13.56965007 | 1.040935966  | 0.294690549 | 3.532301835  | 0.000411959 | 0.01688022  | tnfrsf9a          | ZDB-GENE-060421-8213 | tnfrsf9a          |
| ENSDARG00000078093  | 12.54306355 | 1.206936049  | 0.341765858 | 3.531470506  | 0.000413256 | 0.01689574  | zgc:172065        | ZDB-GENE-080214-2    | zgc:172065        |
| ENSDARG00000094857  | 79.91667923 | -0.972799925 | 0.275666665 | -3.528899389 | 0.000417292 | 0.01699526  | dio2              | ZDB-GENE-030327-4    | dio2              |
| ENSDARG00000019236  | 137.1185374 | 0.536023997  | 0.151902228 | 3.528743482  | 0.000417538 | 0.01699526  | gsr               | ZDB-GENE-050522-116  | gsr               |
| ENSDARG00000079340  | 39.03727353 | -0.630275482 | 0.1787234   | -3.52654147  | 0.000421025 | 0.017099386 | slc47a4           | ZDB-GENE-130530-865  | slc47a4           |
| ENSDARG00000104919  | 20.88426764 | 2.569509268  | 0.729303465 | 3.523237432  | 0.000426309 | 0.017275854 | si:ch211-153b23.3 | ZDB-GENE-141216-408  | si:ch211-153b23.3 |
| ENSDARG00000106212  | 45.93512782 | -1.099285312 | 0.312219607 | -3.520872126 | 0.00043013  | 0.017392377 | LO017965.1        |                      |                   |
| ENSDARG00000116617  | 140.6580518 | -0.562349247 | 0.159869694 | -3.517547519 | 0.000435554 | 0.01757309  | spaca4l           | ZDB-GENE-101011-2    | spaca4l           |
| ENSDARG00000079618  | 22.00599595 | 0.814157786  | 0.231612257 | 3.51517573   | 0.000439463 | 0.017691995 | sik2a             | ZDB-GENE-070705-451  | sik2a             |
| ENSDARG00000044356  | 113.8995464 | -0.589625188 | 0.16838077  | -3.501737086 | 0.000462236 | 0.018568142 | tp63              | ZDB-GENE-030819-1    | tp63              |
| ENSDARG00000032919  | 211.5032937 | -0.343742774 | 0.098180033 | -3.501147473 | 0.000463259 | 0.018568729 | chchd3a           | ZDB-GENE-030131-5005 | chchd3a           |
| ENSDARG00000114503  | 28.36675513 | -0.817968098 | 0.233714883 | -3.49985456  | 0.000465512 | 0.018618459 | phtf2             | ZDB-GENE-040711-4    | phtf2             |
| ENSDARG00000091592  | 33.32938653 | -0.93074579  | 0.265986204 | -3.499225811 | 0.000466611 | 0.018621938 | pel1a             | ZDB-GENE-110310-6    | pel1a             |
| ENSDARG00000099336  | 107.5583716 | 1.555439218  | 0.444752821 | 3.497311645  | 0.000469972 | 0.018715483 | mvda              | ZDB-GENE-041114-127  | mvda              |
| ENSDARG00000059824  | 39.90990609 | -1.597557416 | 0.457257863 | -3.493777897 | 0.000476237 | 0.018875205 | soat2             | ZDB-GENE-061013-742  | soat2             |
| ENSDARG00000040764  | 306.6687074 | 0.439939714  | 0.125932118 | 3.49346714   | 0.000476792 | 0.018875205 | id1               | ZDB-GENE-990415-96   | id1               |
| ENSDARG00000054906  | 57.63375135 | 0.520520037  | 0.149004555 | 3.493316287  | 0.000477061 | 0.018875205 | ier5l             | ZDB-GENE-030131-5134 | ier5l             |
| ENSDARG00000012078  | 217.6691294 | 0.270137623  | 0.077350782 | 3.492370945  | 0.000478753 | 0.018901492 | meis1b            | ZDB-GENE-020122-1    | meis1b            |
| ENSDARG00000071005  | 100.020493  | -0.886447018 | 0.253935651 | -3.490833266 | 0.000481517 | 0.0189699   | ppp1r3ca          | ZDB-GENE-040718-70   | ppp1r3ca          |
| ENSDARG00000052470  | 316.8740193 | -0.482875146 | 0.13835962  | -3.490000529 | 0.00048302  | 0.01898845  | igfbp2a           | ZDB-GENE-000125-12   | igfbp2a           |
| ENSDARG00000011797  | 59.74324137 | -0.531502302 | 0.152461761 | -3.486135131 | 0.000490053 | 0.019223885 | tent5bb           | ZDB-GENE-060503-431  | tent5bb           |
| ENSDARG00000010610  | 21.54003487 | -0.785619077 | 0.225694693 | -3.480892997 | 0.000499745 | 0.019533227 | sarm1             | ZDB-GENE-040219-1    | sarm1             |

|                     |             |              |             |              |             |             |                   |                      |                   |
|---------------------|-------------|--------------|-------------|--------------|-------------|-------------|-------------------|----------------------|-------------------|
| ENSDARG00000075521  | 137.4276146 | 0.337597544  | 0.09699124  | 3.480701389  | 0.000500103 | 0.019533227 | cpz               | ZDB-GENE-090313-267  | cpz               |
| ENSDARG00000005840  | 343.5433007 | -0.385335201 | 0.110723582 | -3.480154764 | 0.000501124 | 0.019533227 | got2b             | ZDB-GENE-030131-7917 | got2b             |
| ENSDARG00000003795  | 1325.434694 | -0.384045977 | 0.110505141 | -3.475367498 | 0.000510154 | 0.019843155 | idh2              | ZDB-GENE-031118-95   | idh2              |
| ENSDARG000000087186 | 120.2696626 | -0.530852801 | 0.152898498 | -3.471929473 | 0.000516732 | 0.020027117 | si:ch211-232b12.5 | ZDB-GENE-031002-40   | si:ch211-232b12.5 |
| ENSDARG000000030107 | 291.8482929 | -0.535480997 | 0.154239111 | -3.471758846 | 0.000517061 | 0.020027117 | si:ch211-207i1.2  | ZDB-GENE-041014-149  | si:ch211-207i1.2  |
| ENSDARG00000015164  | 628.6450649 | -0.528595569 | 0.152299334 | -3.470767435 | 0.000518973 | 0.020058971 | mknk2b            | ZDB-GENE-030829-2    | mknk2b            |
| ENSDARG00000041078  | 286.4876912 | 0.469534988  | 0.135318316 | 3.469855403  | 0.000520739 | 0.020085009 | chka              | ZDB-GENE-050208-149  | chka              |
| ENSDARG00000104924  | 7.891083289 | -1.591650194 | 0.459305452 | -3.465341389 | 0.000529559 | 0.020382474 | BX072577.1        |                      |                   |
| ENSDARG00000098821  | 58.83515802 | -0.562717958 | 0.162448642 | -3.463974533 | 0.000532257 | 0.020443554 | sec14l1           | ZDB-GENE-040426-801  | sec14l1           |
| ENSDARG00000099510  | 271.4437161 | 0.332002928  | 0.095918866 | 3.461289116  | 0.000537595 | 0.020605573 | cnn3a             | ZDB-GENE-030131-5130 | cnn3a             |
| ENSDARG00000045051  | 26.51522229 | -1.234394735 | 0.3567685   | -3.459931961 | 0.000540312 | 0.020666649 | slc16a3           | ZDB-GENE-030131-5487 | slc16a3           |
| ENSDARG00000061660  | 43.69829957 | -0.724340918 | 0.209417719 | -3.458832999 | 0.000542521 | 0.020708101 | CABZ01055347.1    |                      |                   |
| ENSDARG00000055973  | 4.059680521 | 20.10090956  | 5.813730379 | 3.457489125  | 0.000545234 | 0.020768571 | zar1l             | ZDB-GENE-060810-119  | zar1l             |
| ENSDARG00000028431  | 95.50666689 | 0.40551764   | 0.117364271 | 3.45520521   | 0.000549874 | 0.020882194 | adnp2b            | ZDB-GENE-030131-5930 | adnp2b            |
| ENSDARG00000007080  | 56.1957861  | -0.697476002 | 0.20187995  | -3.454904768 | 0.000550487 | 0.020882194 | rhcg1l            | ZDB-GENE-060209-2    | rhcg1l            |
| ENSDARG00000026925  | 101.605054  | 1.302556843  | 0.377266493 | 3.452617358  | 0.000555176 | 0.021016721 | nos2a             | ZDB-GENE-040305-1    | nos2a             |
| ENSDARG00000040002  | 81.32745143 | -0.698898027 | 0.202956315 | -3.443588475 | 0.000574049 | 0.021686548 | pnpla7b           | ZDB-GENE-050309-66   | pnpla7b           |
| ENSDARG00000016439  | 61.25759538 | -0.593255833 | 0.172460477 | -3.43995241  | 0.000581816 | 0.021934958 | slc7a1            | ZDB-GENE-091116-69   | slc7a1            |
| ENSDARG00000006257  | 95.68347979 | 0.565951651  | 0.164783001 | 3.434526906  | 0.000593589 | 0.022325352 | vldlr             | ZDB-GENE-040426-803  | vldlr             |
| ENSDARG00000023151  | 8015.287487 | -0.622940618 | 0.181400282 | -3.434066425 | 0.000594598 | 0.022325352 | ucp1              | ZDB-GENE-010503-1    | ucp1              |
| ENSDARG00000062271  | 16.58873165 | -0.87191634  | 0.253991152 | -3.432861082 | 0.000597248 | 0.022379163 | slc25a15b         | ZDB-GENE-060526-35   | slc25a15b         |
| ENSDARG00000101062  | 95.57808635 | 0.880683034  | 0.256755575 | 3.430044446  | 0.000603482 | 0.022566807 | fdft1             | ZDB-GENE-081104-242  | fdft1             |
| ENSDARG00000032197  | 30.44438066 | -0.673865942 | 0.196725712 | -3.425408579 | 0.000613875 | 0.022908887 | klf12b            | ZDB-GENE-071004-22   | klf12b            |
| ENSDARG00000012021  | 114.2964594 | -0.375711296 | 0.109790325 | -3.422080202 | 0.00062144  | 0.02314423  | kdsr              | ZDB-GENE-040426-853  | kdsr              |
| ENSDARG00000076895  | 75.79404621 | 0.448489534  | 0.131103889 | 3.420871329  | 0.000624209 | 0.023200382 | flrt3             | ZDB-GENE-030131-1988 | flrt3             |
| ENSDARG00000061416  | 6.653952148 | 1.302310209  | 0.380993012 | 3.418199728  | 0.000630368 | 0.023373732 | c2cd4a            | ZDB-GENE-030131-5712 | c2cd4a            |
| ENSDARG00000110991  | 56.7862377  | -0.683369051 | 0.199947124 | -3.417748839 | 0.000631413 | 0.023373732 | ZNF276            | ZDB-GENE-070209-176  | zgc:158366        |
| ENSDARG00000104387  | 80.84747029 | -0.827371185 | 0.24225156  | -3.415338939 | 0.000637027 | 0.023534179 | si:ch211-48m9.1   | ZDB-GENE-060531-64   | si:ch211-48m9.1   |
| ENSDARG00000035859  | 214.2492411 | -0.595120692 | 0.174548533 | -3.409485488 | 0.000650855 | 0.0239865   | angptl4           | ZDB-GENE-041111-222  | angptl4           |
| ENSDARG00000037099  | 84.99516129 | -1.411462149 | 0.414044163 | -3.408965217 | 0.000652098 | 0.0239865   | irs2a             | ZDB-GENE-040426-975  | irs2a             |
| ENSDARG00000076533  | 103.9223739 | 0.422698667  | 0.124025433 | 3.408161189  | 0.000654022 | 0.0239865   | nfe2l1b           | ZDB-GENE-120319-2    | nfe2l1b           |
| ENSDARG00000040890  | 333.4751576 | 1.203554189  | 0.353158877 | 3.407968108  | 0.000654485 | 0.0239865   | fdps              | ZDB-GENE-050506-78   | fdps              |
| ENSDARG00000026376  | 741.2771352 | 0.770807091  | 0.226424345 | 3.404258895  | 0.000663438 | 0.024266282 | aco1              | ZDB-GENE-031118-76   | aco1              |
| ENSDARG00000052734  | 3512.696898 | 0.717964615  | 0.21105257  | 3.401828338  | 0.000669367 | 0.02443454  | hmgcra            | ZDB-GENE-040401-2    | hmgcra            |
| ENSDARG00000030289  | 16.99897014 | 0.766888259  | 0.225498    | 3.400865019  | 0.00067173  | 0.02447225  | jag1a             | ZDB-GENE-011128-2    | jag1a             |
| ENSDARG00000079011  | 269.0853137 | -0.683501897 | 0.201076638 | -3.399210883 | 0.000675806 | 0.024572088 | col17a1b          | ZDB-GENE-030131-7145 | col17a1b          |
| ENSDARG00000077101  | 73.18274016 | 0.370677354  | 0.109116808 | 3.39706925   | 0.000681117 | 0.024716362 | zbtb10            | ZDB-GENE-030429-10   | zbtb10            |
| ENSDARG00000024167  | 3.749712147 | 1.688096606  | 0.498123397 | 3.388912499  | 0.000701704 | 0.025413287 | kcnh1a            | ZDB-GENE-061226-1    | kcnh1a            |
| ENSDARG00000018478  | 1006.943139 | -0.618671036 | 0.183184587 | -3.377309445 | 0.000731987 | 0.026412525 | agxtb             | ZDB-GENE-010302-3    | agxtb             |
| ENSDARG00000006508  | 48.35903072 | -0.699357952 | 0.207079606 | -3.377242055 | 0.000732166 | 0.026412525 | pip5k1bb          | ZDB-GENE-040912-141  | pip5k1bb          |
| ENSDARG00000055158  | 162.5197521 | -0.513214755 | 0.152054065 | -3.375212324 | 0.000737588 | 0.026556041 | prox1a            | ZDB-GENE-980526-397  | prox1a            |
| ENSDARG00000042620  | 1601.330862 | 0.396562159  | 0.117634252 | 3.371145317  | 0.000748564 | 0.02689858  | gstr              | ZDB-GENE-090507-1    | gstr              |
| ENSDARG000000069640 | 12.59147376 | 0.750975448  | 0.222912856 | 3.368919414  | 0.000754635 | 0.027063884 | vegfc             | ZDB-GENE-040303-4    | vegfc             |

|                     |             |              |             |              |             |             |                    |                      |                    |
|---------------------|-------------|--------------|-------------|--------------|-------------|-------------|--------------------|----------------------|--------------------|
| ENSDARG00000087289  | 7.720179158 | -1.090970166 | 0.324028173 | -3.366899109 | 0.000760185 | 0.027209888 | zgc:66473          | ZDB-GENE-030131-5708 | zgc:66473          |
| ENSDARG00000077169  | 33.60946535 | 1.85457007   | 0.552281865 | 3.3580137    | 0.000785047 | 0.02804524  | si:ch211-153b23.4  | ZDB-GENE-030131-7332 | si:ch211-153b23.4  |
| ENSDARG00000091119  | 14.81946284 | -0.976216971 | 0.290947218 | -3.355306082 | 0.000792772 | 0.028266322 | fbxo40.2           | ZDB-GENE-120215-105  | fbxo40.2           |
| ENSDARG00000109946  | 5.689131776 | 1.254986163  | 0.374481437 | 3.351264008  | 0.000804436 | 0.028626708 | BX005027.2         |                      |                    |
| ENSDARG00000012269  | 21.45097645 | 0.734704801  | 0.21952366  | 3.346813735  | 0.000817461 | 0.029034075 | clcn1b             | ZDB-GENE-100921-11   | clcn1b             |
| ENSDARG00000057652  | 482.4642488 | -0.44305941  | 0.132420726 | -3.345846413 | 0.000820318 | 0.029079411 | dbpb               | ZDB-GENE-100922-6    | dbpb               |
| ENSDARG00000013946  | 92.34589176 | -0.534199139 | 0.15978498  | -3.343237523 | 0.00082807  | 0.02929775  | ivns1abpb          | ZDB-GENE-030131-6266 | ivns1abpb          |
| ENSDARG00000074624  | 343.0883167 | 0.223284216  | 0.066829465 | 3.34110434   | 0.000834459 | 0.029454516 | si:ch211-198a12.6  | ZDB-GENE-030131-1683 | si:ch211-198a12.6  |
| ENSDARG00000061682  | 36.81543255 | -0.535788821 | 0.160382648 | -3.340690705 | 0.000835703 | 0.029454516 | bicc1a             | ZDB-GENE-101223-3    | bicc1a             |
| ENSDARG00000094132  | 38.95886112 | -0.809955835 | 0.242519852 | -3.339750664 | 0.000838536 | 0.029468474 | igf1               | ZDB-GENE-010607-2    | igf1               |
| ENSDARG00000061294  | 304.3669451 | 0.297601904  | 0.089115783 | 3.339497147  | 0.000839302 | 0.029468474 | arhgap5            | ZDB-GENE-081014-1    | arhgap5            |
| ENSDARG00000043843  | 79.30380305 | 0.560982323  | 0.168019661 | 3.338789753  | 0.000841442 | 0.029473595 | akap7              | ZDB-GENE-040724-128  | akap7              |
| ENSDARG00000094210  | 30.23080152 | 0.88863131   | 0.266185539 | 3.338390629  | 0.000842652 | 0.029473595 | fthl31             | ZDB-GENE-050522-428  | fthl31             |
| ENSDARG00000008886  | 10.26923995 | 1.092130333  | 0.327314274 | 3.336641328  | 0.000847973 | 0.029569732 | msx1b              | ZDB-GENE-980526-26   | msx1b              |
| ENSDARG000000105117 | 163.919884  | -0.51165455  | 0.153353854 | -3.336430979 | 0.000848615 | 0.029569732 | sdad1              | ZDB-GENE-021213-1    | sdad1              |
| ENSDARG00000001621  | 16.99557163 | 0.705863914  | 0.211662584 | 3.334854471  | 0.000853441 | 0.029681661 | nfyal              | ZDB-GENE-040718-491  | nfyal              |
| ENSDARG00000052705  | 30.60759956 | -1.669815104 | 0.501333754 | -3.33074542  | 0.000866138 | 0.03006642  | pkp1b              | ZDB-GENE-030131-417  | pkp1b              |
| ENSDARG00000076848  | 107.3876057 | 0.939534596  | 0.282168359 | 3.329695078  | 0.000869411 | 0.030123221 | zgc:112492         | ZDB-GENE-050417-143  | zgc:112492         |
| ENSDARG00000035415  | 10.20306981 | -1.004853429 | 0.30186365  | -3.328832164 | 0.000872109 | 0.030159904 | ptger4b            | ZDB-GENE-060531-102  | ptger4b            |
| ENSDARG00000060196  | 45.09951733 | -0.53768317  | 0.161651777 | -3.326181617 | 0.000880445 | 0.030391059 | lhpp               | ZDB-GENE-070615-43   | lhpp               |
| ENSDARG00000088689  | 9.457821373 | -3.530266579 | 1.061608617 | -3.325393674 | 0.000882938 | 0.030420015 | si:ch211-201o1.1   | ZDB-GENE-120709-60   | si:ch211-201o1.1   |
| ENSDARG00000097057  | 104.2327154 | -0.508718731 | 0.153303511 | -3.31837626  | 0.000905424 | 0.031136441 | fxyd6l             | ZDB-GENE-071205-8    | fxyd6l             |
| ENSDARG00000100095  | 132.2290987 | -0.609390516 | 0.183915097 | -3.313433894 | 0.000921579 | 0.031632852 | anxa1b             | ZDB-GENE-030131-6554 | anxa1b             |
| ENSDARG000000102554 | 8.461935489 | -1.08218615  | 0.32675884  | -3.311880251 | 0.000926712 | 0.03174981  | zgc:112433         | ZDB-GENE-050417-294  | zgc:112433         |
| ENSDARG00000070047  | 135.6472233 | 0.458297774  | 0.138523802 | 3.308440613  | 0.000938171 | 0.032082651 | rgs4               | ZDB-GENE-030131-9839 | rgs4               |
| ENSDARG00000001234  | 36.03042143 | -0.729710893 | 0.220675672 | -3.306712006 | 0.000943979 | 0.032221379 | map4k2             | ZDB-GENE-030616-163  | map4k2             |
| ENSDARG00000074168  | 280.8661395 | -0.293523452 | 0.088796257 | -3.305583622 | 0.000947788 | 0.032291494 | tasor2             | ZDB-GENE-041111-225  | tasor2             |
| ENSDARG00000011618  | 101.6020293 | -0.731132662 | 0.221333792 | -3.303303381 | 0.00095553  | 0.032492101 | slc26a2            | ZDB-GENE-030717-3    | slc26a2            |
| ENSDARG00000035459  | 41.75689638 | -0.526581827 | 0.159434435 | -3.302811135 | 0.000957208 | 0.032492101 | spns3              | ZDB-GENE-060531-7    | spns3              |
| ENSDARG00000032816  | 131.045699  | 0.703341381  | 0.213026375 | 3.301663375  | 0.000961133 | 0.032565254 | tm7sf2             | ZDB-GENE-041212-19   | tm7sf2             |
| ENSDARG00000025375  | 1213.393134 | 0.541029416  | 0.163946792 | 3.300030512  | 0.000966743 | 0.032695112 | idh1               | ZDB-GENE-031006-1    | idh1               |
| ENSDARG00000016687  | 546.0483033 | -0.364025366 | 0.110391293 | -3.297591286 | 0.00097518  | 0.032919919 | acadvl             | ZDB-GENE-030131-899  | acadvl             |
| ENSDARG00000037359  | 42.41891078 | -0.692861404 | 0.21051886  | -3.291208229 | 0.00099758  | 0.03361444  | si:ch1073-272o11.3 | ZDB-GENE-121214-325  | si:ch1073-272o11.3 |
| ENSDARG00000099554  | 93.01385298 | -0.376427332 | 0.114433539 | -3.289484304 | 0.001003712 | 0.033759205 | sec16b             | ZDB-GENE-050208-274  | sec16b             |
| ENSDARG00000036171  | 222.8250503 | -0.772671652 | 0.235015083 | -3.287753464 | 0.001009902 | 0.033905444 | rnasel3            | ZDB-GENE-050809-5    | rnasel3            |
| ENSDARG00000074652  | 21.26460409 | -0.751270968 | 0.228597775 | -3.286431676 | 0.001014654 | 0.034002917 | smtna              | ZDB-GENE-091204-245  | smtna              |
| ENSDARG00000056331  | 219.5579654 | -0.345286197 | 0.105089094 | -3.285652055 | 0.001017466 | 0.034035166 | ahcyl1             | ZDB-GENE-021206-7    | ahcyl1             |
| ENSDARG00000117001  | 155.3562639 | -0.816526144 | 0.249348031 | -3.274644441 | 0.00105795  | 0.035325175 | CABZ01086812.1     |                      |                    |
| ENSDARG00000007836  | 644.5799523 | -0.382668334 | 0.116986413 | -3.271049379 | 0.001071492 | 0.035682613 | ctsla              | ZDB-GENE-030131-106  | ctsla              |
| ENSDARG00000009544  | 107.0205051 | -0.612483539 | 0.187260566 | -3.270755568 | 0.001072606 | 0.035682613 | cldnb              | ZDB-GENE-010328-2    | cldnb              |
| ENSDARG00000078328  | 40.98367707 | -0.460395339 | 0.14078234  | -3.270263429 | 0.001074474 | 0.035682613 | sec22a             | ZDB-GENE-030131-3553 | sec22a             |
| ENSDARG00000035506  | 53.51146273 | -0.555428142 | 0.169878679 | -3.269557705 | 0.001077158 | 0.035707291 | entpd2a.1          | ZDB-GENE-040724-187  | entpd2a.1          |
| ENSDARG00000078992  | 361.6250766 | 0.313531769  | 0.095943751 | 3.267870663  | 0.001083599 | 0.035856204 | wnk1a              | ZDB-GENE-080917-49   | wnk1a              |

|                    |             |              |             |              |             |              |                   |                      |                   |
|--------------------|-------------|--------------|-------------|--------------|-------------|--------------|-------------------|----------------------|-------------------|
| ENSDARG00000055226 | 141.1960412 | -0.628307919 | 0.192320635 | -3.266981308 | 0.001087009 | 0.035904459  | slc7a7            | ZDB-GENE-051127-5    | slc7a7            |
| ENSDARG00000070892 | 577.1062886 | -0.45220773  | 0.138468787 | -3.265773755 | 0.001091654 | 0.03599329   | si:ch211-262h13.5 | ZDB-GENE-050208-372  | si:ch211-262h13.5 |
| ENSDARG00000031664 | 13.58565664 | 1.21782996   | 0.37318863  | 3.263309391  | 0.001101192 | 0.03624282   | sox21a            | ZDB-GENE-990715-6    | sox21a            |
| ENSDARG00000017038 | 24.02028202 | -1.774318743 | 0.543861196 | -3.262447764 | 0.001104545 | 0.036288257  | zgc:152670        | ZDB-GENE-060929-954  | zgc:152670        |
| ENSDARG00000043257 | 1250.704529 | 0.374125084  | 0.114786926 | 3.25930049   | 0.001116873 | 0.03658957   | ckbb              | ZDB-GENE-020103-2    | ckbb              |
| ENSDARG00000056619 | 38.63237082 | 0.480124771  | 0.14731857  | 3.259091985  | 0.001117694 | 0.03658957   | arhgap42a         | ZDB-GENE-030131-8077 | arhgap42a         |
| ENSDARG00000088048 | 20.39263175 | 0.722977666  | 0.221983787 | 3.256894006  | 0.001126385 | 0.036808576  | fgf18a            | ZDB-GENE-030714-1    | fgf18a            |
| ENSDARG00000001910 | 266.1563054 | 0.348595319  | 0.107137301 | 3.253725035  | 0.001139025 | 0.037155632  | rorab             | ZDB-GENE-040426-855  | rorab             |
| ENSDARG00000053835 | 58.03080863 | 0.598748862  | 0.184173121 | 3.251011101  | 0.001149954 | 0.037445748  | plekhh1           | ZDB-GENE-061219-1    | plekhh1           |
| ENSDARG00000058561 | 20.79956352 | 0.659250439  | 0.202934861 | 3.24858151   | 0.00115982  | 0.037700289  | fbxo30a           | ZDB-GENE-040426-1215 | fbxo30a           |
| ENSDARG00000101251 | 1274.265908 | -0.427010035 | 0.131693294 | -3.242458472 | 0.001185032 | 0.038451891  | ldha              | ZDB-GENE-991026-5    | ldha              |
| ENSDARG00000006125 | 342.4903822 | -0.24913129  | 0.0769758   | -3.236488476 | 0.001210101 | 0.039196198  | csnk1db           | ZDB-GENE-040426-2385 | csnk1db           |
| ENSDARG00000076592 | 112.6757034 | -0.412812138 | 0.127587433 | -3.235523498 | 0.001214199 | 0.039259809  | man1b1b           | ZDB-GENE-070705-482  | man1b1b           |
| ENSDARG00000026500 | 18.10558618 | -0.899328953 | 0.278061168 | -3.234284598 | 0.001219479 | 0.039361349  | xkr9              | ZDB-GENE-060421-6224 | xkr9              |
| ENSDARG00000019976 | 518.5523393 | 0.745289477  | 0.230603772 | 3.231904976  | 0.001229679 | 0.039577123  | idi1              | ZDB-GENE-050913-44   | idi1              |
| ENSDARG00000060322 | 12.48056663 | 1.026072476  | 0.317500207 | 3.231722229  | 0.001230466 | 0.039577123  | zgc:153654        | ZDB-GENE-060929-1102 | zgc:153654        |
| ENSDARG00000040190 | 399.2388644 | 0.561706554  | 0.173837636 | 3.231213726  | 0.001232657 | 0.039578411  | qdpra             | ZDB-GENE-070705-197  | qdpra             |
| ENSDARG00000058003 | 43.72208053 | 0.617200695  | 0.191080139 | 3.23006199   | 0.001237634 | 0.039668966  | wfdc1             | ZDB-GENE-070112-352  | wfdc1             |
| ENSDARG00000104734 | 31.8986867  | 0.529745213  | 0.164116213 | 3.227866411  | 0.001247172 | 0.039785849  | kat2a             | ZDB-GENE-080403-11   | kat2a             |
| ENSDARG00000075833 | 9.04494649  | -1.125886573 | 0.348825984 | -3.227645376 | 0.001248136 | 0.039785849  | lyve1a            | ZDB-GENE-031118-138  | lyve1a            |
| ENSDARG00000105052 | 121.7360708 | 0.741833766  | 0.229838175 | 3.227635117  | 0.001248181 | 0.039785849  | cfhl5             | ZDB-GENE-050208-782  | cfhl5             |
| ENSDARG00000042857 | 22.21397239 | 0.64240851   | 0.199058525 | 3.227234343  | 0.00124993  | 0.039785849  | si:ch211-246m6.4  | ZDB-GENE-050208-498  | si:ch211-246m6.4  |
| ENSDARG00000054363 | 85.46834733 | -0.405266107 | 0.125632694 | -3.225801302 | 0.001256205 | 0.039916521  | si:zfos-464b6.2   | ZDB-GENE-030131-5337 | si:zfos-464b6.2   |
| ENSDARG00000055989 | 38.02708237 | -0.49420668  | 0.153598304 | -3.217526933 | 0.001293009 | 0.041015133  | tmem161b          | ZDB-GENE-040426-2693 | tmem161b          |
| ENSDARG00000005191 | 3305.152019 | -0.369560105 | 0.11500828  | -3.213334761 | 0.001312033 | 0.041546949  | ahcy              | ZDB-GENE-031219-6    | ahcy              |
| ENSDARG00000101892 | 30.955085   | -0.633912639 | 0.197395269 | -3.211387193 | 0.001320958 | 0.041711938  | ino80e            | ZDB-GENE-040426-1818 | ino80e            |
| ENSDARG00000059369 | 15.02781265 | -1.182556602 | 0.368258988 | -3.211209066 | 0.001321777 | 0.041711938  | si:ch1073-15f12.3 | ZDB-GENE-081104-69   | si:ch1073-15f12.3 |
| ENSDARG00000035458 | 26302.09742 | -0.708681847 | 0.220881116 | -3.208431129 | 0.001334613 | 0.04204487   | atp2a1l           | ZDB-GENE-041229-2    | atp2a1l           |
| ENSDARG00000105324 | 12.98920916 | -1.107594298 | 0.346200033 | -3.19928998  | 0.001377665 | 0.043326983  | si:dkey-11o1.7    | ZDB-GENE-160113-19   | si:dkey-11o1.7    |
| ENSDARG00000055395 | 30.12858386 | 0.742989288  | 0.232392674 | 3.197128698  | 0.00138803  | 0.043578452  | foxq1b            | ZDB-GENE-040426-2090 | foxq1b            |
| ENSDARG00000043492 | 7.673014846 | 1.111252393  | 0.347643884 | 3.196525074  | 0.001390937 | 0.043594435  | irf1a             | ZDB-GENE-060421-4031 | irf1a             |
| ENSDARG00000100476 | 7.516575836 | -1.146366431 | 0.358683381 | -3.196039997 | 0.001393278 | 0.043594435  | si:dkeyp-110c7.4  | ZDB-GENE-070705-532  | si:dkeyp-110c7.4  |
| ENSDARG00000007869 | 65.70277949 | -0.45242174  | 0.141690778 | -3.193021781 | 0.001407923 | 0.043977882  | ehd3              | ZDB-GENE-041014-352  | ehd3              |
| ENSDARG00000060113 | 103.9515395 | 0.532825682  | 0.166926154 | 3.191984416  | 0.00141299  | 0.044061325  | znf395a           | ZDB-GENE-061215-52   | znf395a           |
| ENSDARG00000100149 | 85.26669563 | 0.441919904  | 0.138584619 | 3.188809165  | 0.001428602 | 0.0444446912 | axin2             | ZDB-GENE-000403-2    | axin2             |
| ENSDARG00000090468 | 48.83622291 | -0.783164005 | 0.245652162 | -3.188101408 | 0.001432103 | 0.0444446912 | ppp1r3aa          | ZDB-GENE-110914-122  | ppp1r3aa          |
| ENSDARG00000086445 | 3.600966208 | -1.746484513 | 0.547830672 | -3.188000603 | 0.001432602 | 0.0444446912 | adgrf7            | ZDB-GENE-041001-214  | adgrf7            |
| ENSDARG00000054288 | 69.45280502 | -0.577618918 | 0.181394107 | -3.184331218 | 0.001450889 | 0.044938476  | zgc:63972         | ZDB-GENE-040426-1320 | zgc:63972         |
| ENSDARG00000018266 | 65.1790441  | 0.822436714  | 0.258473863 | 3.181895084  | 0.001463148 | 0.045171943  | mthfd1a           | ZDB-GENE-041001-127  | mthfd1a           |
| ENSDARG00000075343 | 14.02255615 | -0.70229241  | 0.220717734 | -3.181857652 | 0.001463337 | 0.045171943  | csf1a             | ZDB-GENE-080204-107  | csf1a             |
| ENSDARG00000028048 | 27.28951367 | 0.528910303  | 0.166373933 | 3.179045505  | 0.001477609 | 0.045536095  | rdh8a             | ZDB-GENE-021115-3    | rdh8a             |
| ENSDARG00000109820 | 27.14577268 | -0.855686206 | 0.26924955  | -3.178041358 | 0.001482736 | 0.045567849  | NPAS3             |                      |                   |
| ENSDARG00000062058 | 152.6113647 | -0.424222597 | 0.133492585 | -3.177873852 | 0.001483593 | 0.045567849  | slc12a7b          | ZDB-GENE-030829-61   | slc12a7b          |

|                     |             |              |             |              |             |             |                  |                      |                  |
|---------------------|-------------|--------------|-------------|--------------|-------------|-------------|------------------|----------------------|------------------|
| ENSDARG00000056379  | 45.52426318 | -0.490000788 | 0.15428361  | -3.175974361 | 0.001493341 | 0.0457861   | si:ch73-86n18.1  | ZDB-GENE-141216-19   | si:ch73-86n18.1  |
| ENSDARG00000103459  | 449.662915  | -0.517826094 | 0.16306849  | -3.175512904 | 0.001495719 | 0.0457861   | evplb            | ZDB-GENE-030131-212  | evplb            |
| ENSDARG00000029905  | 228.2117067 | 0.501473508  | 0.157942481 | 3.175038814  | 0.001498165 | 0.0457861   | phyhd1           | ZDB-GENE-041114-159  | phyhd1           |
| ENSDARG00000104636  | 50.76286604 | -0.453780518 | 0.143054257 | -3.172086797 | 0.001513478 | 0.046122476 | si:dkey-112a7.4  | ZDB-GENE-030131-9661 | si:dkey-112a7.4  |
| ENSDARG00000007823  | 69.5699399  | 0.75007932   | 0.236475801 | 3.171907305  | 0.001514413 | 0.046122476 | atf3             | ZDB-GENE-040426-728  | atf3             |
| ENSDARG00000040988  | 1388.061511 | -0.324191099 | 0.102227534 | -3.171269864 | 0.001517741 | 0.046122476 | tpi1b            | ZDB-GENE-020416-4    | tpi1b            |
| ENSDARG00000063535  | 337.8515855 | 0.327548824  | 0.103295415 | 3.170990934  | 0.001519199 | 0.046122476 | chd4a            | ZDB-GENE-041111-187  | chd4a            |
| ENSDARG00000071065  | 255.6925996 | 0.613630578  | 0.193597322 | 3.169623273  | 0.001526367 | 0.046263755 | g6pd             | ZDB-GENE-070508-4    | g6pd             |
| ENSDARG00000045898  | 61.12533875 | -0.626793394 | 0.197862165 | -3.167828449 | 0.001535821 | 0.046462331 | si:ch211-152c2.3 | ZDB-GENE-030131-9914 | si:ch211-152c2.3 |
| ENSDARG00000077709  | 65.39466259 | -0.481271349 | 0.15194418  | -3.167422057 | 0.001537969 | 0.046462331 | iqsec2b          | ZDB-GENE-081105-73   | iqsec2b          |
| ENSDARG00000036237  | 1069.121908 | -0.483861229 | 0.152872579 | -3.165127671 | 0.001550149 | 0.046753515 | slc27a2a         | ZDB-GENE-050706-104  | slc27a2a         |
| ENSDARG00000041483  | 60.69060739 | -0.560072146 | 0.177051446 | -3.163329978 | 0.001559754 | 0.046966218 | paqr6            | ZDB-GENE-090714-1    | paqr6            |
| ENSDARG00000062467  | 38.76188981 | -0.619113955 | 0.196003093 | -3.158694818 | 0.001584773 | 0.047641605 | stra6l           | ZDB-GENE-070410-116  | stra6l           |
| ENSDARG00000079637  | 100.3848599 | -0.707030782 | 0.224049923 | -3.155684114 | 0.001601222 | 0.048057548 | alpk2            | ZDB-GENE-030131-1868 | alpk2            |
| ENSDARG00000027609  | 225.6530309 | -0.425195703 | 0.13476906  | -3.154994935 | 0.001605009 | 0.048092759 | hpn              | ZDB-GENE-141212-373  | hpn              |
| ENSDARG00000008310  | 118.5000613 | -0.360280288 | 0.114249447 | -3.153453232 | 0.001613511 | 0.048268897 | ip6k2a           | ZDB-GENE-030131-760  | ip6k2a           |
| ENSDARG00000001857  | 184.601249  | -0.380516338 | 0.120804561 | -3.149850754 | 0.001633539 | 0.048788715 | aff4             | ZDB-GENE-100910-5    | aff4             |
| ENSDARG00000088975  | 20.2399517  | 0.684457543  | 0.217404295 | 3.14831656   | 0.001642138 | 0.04896604  | si:ch211-14k19.8 | ZDB-GENE-051214-4    | si:ch211-14k19.8 |
| ENSDARG00000045074  | 48.46247181 | -0.495143562 | 0.157444395 | -3.144878938 | 0.001661556 | 0.04946489  | arl4d            | ZDB-GENE-030131-2293 | arl4d            |
| ENSDARG00000003680  | 59.47619523 | 0.536745276  | 0.171053079 | 3.137887246  | 0.001701703 | 0.050578249 | runx1t1          | ZDB-GENE-060929-164  | runx1t1          |
| ENSDARG00000017244  | 131.0597814 | 0.339800756  | 0.108323853 | 3.136896884  | 0.001707462 | 0.050667548 | chd6             | ZDB-GENE-130530-559  | chd6             |
| ENSDARG00000112234  | 210.1378009 | -0.512236305 | 0.163442266 | -3.134050438 | 0.001724112 | 0.051079253 | endouc           | ZDB-GENE-060503-141  | endouc           |
| ENSDARG00000017004  | 105.4705175 | 0.340961908  | 0.108837216 | 3.132769486  | 0.001731654 | 0.051206203 | myo10            | ZDB-GENE-070912-277  | myo10            |
| ENSDARG00000012823  | 11.88734353 | 0.918980222  | 0.293404187 | 3.132130565  | 0.001735427 | 0.051206203 | dlgap4b          | ZDB-GENE-101215-2    | dlgap4b          |
| ENSDARG00000059054  | 263.9016056 | -0.79522012  | 0.253909213 | -3.131907308 | 0.001736747 | 0.051206203 | pdk2b            | ZDB-GENE-040426-939  | pdk2b            |
| ENSDARG00000053479  | 22.40783839 | 0.784802218  | 0.250637491 | 3.131224364  | 0.001740791 | 0.05124332  | gdf6a            | ZDB-GENE-980526-373  | gdf6a            |
| ENSDARG00000059719  | 35.96555413 | -0.808035303 | 0.258416367 | -3.126873555 | 0.001766759 | 0.051897196 | fam169aa         | ZDB-GENE-060825-117  | fam169aa         |
| ENSDARG00000016545  | 82.18082003 | -0.466451224 | 0.149189928 | -3.12655975  | 0.001768646 | 0.051897196 | zgc:154046       | ZDB-GENE-061103-289  | zgc:154046       |
| ENSDARG00000104713  | 16.47575452 | -0.998892091 | 0.319586181 | -3.12557973  | 0.00177455  | 0.051987521 | zgc:165653       | ZDB-GENE-070620-24   | zgc:165653       |
| ENSDARG00000098312  | 494.8305341 | 0.429952811  | 0.13770418  | 3.122293087  | 0.001794482 | 0.052487884 | scarb2a          | ZDB-GENE-020419-29   | scarb2a          |
| ENSDARG00000100003  | 177.9191593 | -0.556181565 | 0.178201962 | -3.121074306 | 0.001801926 | 0.052621948 | glulb            | ZDB-GENE-030131-8417 | glulb            |
| ENSDARG00000016830  | 176.9492973 | 0.391929993  | 0.125680453 | 3.118464191  | 0.001817962 | 0.053006134 | rimkla           | ZDB-GENE-040912-20   | rimkla           |
| ENSDARG00000093448  | 247.2944668 | -0.360555116 | 0.115669452 | -3.117116139 | 0.001826296 | 0.053164866 | mpc1             | ZDB-GENE-040718-94   | mpc1             |
| ENSDARG00000012944  | 16601.63441 | -0.882803185 | 0.283337415 | -3.11573106  | 0.001834895 | 0.053330813 | myhz2            | ZDB-GENE-020604-1    | myhz2            |
| ENSDARG00000007127  | 115.5519992 | 1.333074513  | 0.428367308 | 3.111989378  | 0.001858312 | 0.053926217 | acat2            | ZDB-GENE-990714-22   | acat2            |
| ENSDARG000000086790 | 16.12578287 | -0.844224724 | 0.271719478 | -3.106971689 | 0.001890145 | 0.054758052 | gucy1b1          |                      |                  |
| ENSDARG00000008858  | 63.33204569 | 0.519445806  | 0.167210595 | 3.106536445  | 0.00189293  | 0.054758052 | cyp7b1           | ZDB-GENE-070912-293  | cyp7b1           |
| ENSDARG00000059083  | 23.48779996 | 0.591786554  | 0.190729593 | 3.102751628  | 0.001917305 | 0.055370991 | ppp2r5ca         | ZDB-GENE-120406-9    | ppp2r5ca         |
| ENSDARG00000004082  | 43.63122837 | -0.691010487 | 0.222740299 | -3.102314624 | 0.001920138 | 0.055370991 | cx39.9           | ZDB-GENE-040406-2    | cx39.9           |
| ENSDARG00000061274  | 115.6465088 | 1.244897383  | 0.401583098 | 3.099974551  | 0.001935373 | 0.055722984 | lss              | ZDB-GENE-050119-7    | lss              |
| ENSDARG000000060729 | 164.3427003 | 0.331007571  | 0.106928074 | 3.095609573  | 0.001964088 | 0.056461389 | trim8b           | ZDB-GENE-030131-4325 | trim8b           |
| ENSDARG00000074457  | 89.59010485 | 0.822880105  | 0.266086429 | 3.092529408  | 0.001984586 | 0.056961634 | si:dkey-96f10.1  | ZDB-GENE-090312-154  | si:dkey-96f10.1  |
| ENSDARG000000056840 | 70.96616754 | -0.362612032 | 0.117372087 | -3.089423063 | 0.002005456 | 0.057471008 | otud5b           | ZDB-GENE-040801-50   | otud5b           |

|                     |             |              |             |              |             |             |                  |                      |                  |
|---------------------|-------------|--------------|-------------|--------------|-------------|-------------|------------------|----------------------|------------------|
| ENSDARG00000058292  | 43.15458123 | 0.587735362  | 0.190370947 | 3.087316473  | 0.002019724 | 0.057789876 | sephs1           | ZDB-GENE-030131-3670 | sephs1           |
| ENSDARG00000008275  | 138.597484  | -0.596211772 | 0.193190706 | -3.086130719 | 0.002027797 | 0.057930746 | klhl24b          | ZDB-GENE-040426-1185 | klhl24b          |
| ENSDARG000000099124 | 13.66770688 | -0.907777985 | 0.294254871 | -3.085005799 | 0.002035482 | 0.058025636 | f3a              | ZDB-GENE-0701119-5   | f3a              |
| ENSDARG00000078770  | 70.89850562 | 0.594726486  | 0.192797442 | 3.084721869  | 0.002037426 | 0.058025636 | si:ch73-21k16.5  | ZDB-GENE-030131-8374 | si:ch73-21k16.5  |
| ENSDARG00000059035  | 2149.101813 | -0.388313779 | 0.125936204 | -3.083416579 | 0.002046385 | 0.058190706 | porb             | ZDB-GENE-030131-5767 | porb             |
| ENSDARG00000077852  | 85.39036683 | 0.338236185  | 0.109735576 | 3.08228376   | 0.002054189 | 0.058322488 | samd11           | ZDB-GENE-060428-2    | samd11           |
| ENSDARG00000016396  | 15.73163299 | 0.785259334  | 0.254806781 | 3.081783507  | 0.002057644 | 0.05833057  | fam219aa         | ZDB-GENE-040801-110  | fam219aa         |
| ENSDARG00000103220  | 116.2506503 | -0.493258333 | 0.160125611 | -3.080446223 | 0.002066907 | 0.058503001 | slc10a3          | ZDB-GENE-040426-2347 | slc10a3          |
| ENSDARG00000070798  | 34.41334925 | 0.910505164  | 0.2960962   | 3.075031576  | 0.002104803 | 0.059484117 | pmvk             | ZDB-GENE-070410-91   | pmvk             |
| ENSDARG00000029832  | 111.6743657 | -0.447972854 | 0.145847549 | -3.071514449 | 0.002129759 | 0.060068088 | slc26a1          | ZDB-GENE-070112-2182 | slc26a1          |
| ENSDARG00000059388  | 113.0050972 | 0.390459734  | 0.127135846 | 3.071200976  | 0.002131996 | 0.060068088 | bdh1             | ZDB-GENE-070410-130  | bdh1             |
| ENSDARG00000028583  | 9.752758664 | 0.924668304  | 0.301281427 | 3.069118174  | 0.002146916 | 0.060395978 | si:ch211-234h8.7 | ZDB-GENE-061009-16   | si:ch211-234h8.7 |
| ENSDARG00000056125  | 17.68340788 | 0.652542941  | 0.212949566 | 3.064307446  | 0.002181746 | 0.061282073 | myct1a           | ZDB-GENE-041001-143  | myct1a           |
| ENSDARG00000039381  | 4.57995     | -1.599326521 | 0.522023509 | -3.06370593  | 0.002186137 | 0.061311808 | ch25hl1.1        | ZDB-GENE-030131-8617 | ch25hl1.1        |
| ENSDARG00000023542  | 19.92928318 | 0.776370042  | 0.253654935 | 3.060733045  | 0.002207959 | 0.061829562 | cdh7a            | ZDB-GENE-061019-3    | cdh7a            |
| ENSDARG00000099959  | 1303.260766 | -1.072796674 | 0.35070627  | -3.058960632 | 0.002221063 | 0.062040965 | smyhc1           | ZDB-GENE-030131-271  | smyhc1           |
| ENSDARG00000024433  | 3281.434013 | -0.584254107 | 0.191023384 | -3.058547571 | 0.002224128 | 0.062040965 | pvalb4           | ZDB-GENE-040625-48   | pvalb4           |
| ENSDARG00000017982  | 92.65465618 | 0.835030726  | 0.27310137  | 3.057585275  | 0.002231281 | 0.062040965 | cyp39a1          | ZDB-GENE-041014-339  | cyp39a1          |
| ENSDARG00000003695  | 1141.019733 | -0.254752182 | 0.083321043 | -3.057477128 | 0.002232087 | 0.062040965 | vdac3            | ZDB-GENE-040426-2380 | vdac3            |
| ENSDARG00000063626  | 747.8408921 | -0.379108534 | 0.123998207 | -3.057371096 | 0.002232877 | 0.062040965 | ddx21            | ZDB-GENE-031113-10   | ddx21            |
| ENSDARG00000016875  | 430.5495735 | -0.364082383 | 0.119098446 | -3.056986853 | 0.002235741 | 0.062040965 | gys1             | ZDB-GENE-040426-1243 | gys1             |
| ENSDARG00000017230  | 110.2023711 | 0.422881603  | 0.138414228 | 3.055188836  | 0.002249189 | 0.062320138 | fbxw11b          | ZDB-GENE-040426-2903 | fbxw11b          |
| ENSDARG00000058734  | 75.18727444 | 1.044160961  | 0.341875599 | 3.054213178  | 0.002256517 | 0.062414803 | prdx1            | ZDB-GENE-050320-35   | prdx1            |
| ENSDARG00000060397  | 96.3304517  | -0.363006314 | 0.11886914  | -3.053831413 | 0.00225939  | 0.062414803 | hhip             | ZDB-GENE-030131-4827 | hhip             |
| ENSDARG00000088124  | 57.20846269 | -0.443350744 | 0.145291171 | -3.051463763 | 0.002277285 | 0.062814836 | adrb2a           | ZDB-GENE-100414-3    | adrb2a           |
| ENSDARG00000032221  | 35.96512838 | 0.454105552  | 0.148838145 | 3.051002492  | 0.002280787 | 0.062817239 | phactr4b         | ZDB-GENE-040426-1131 | phactr4b         |
| ENSDARG00000062646  | 304.5455934 | 0.330285186  | 0.10829388  | 3.049897067  | 0.002289198 | 0.062879702 | tet3             | ZDB-GENE-060526-109  | tet3             |
| ENSDARG00000061081  | 116.0475529 | -0.598957587 | 0.196399027 | -3.049697322 | 0.002290721 | 0.062879702 | arpp21           | ZDB-GENE-081104-296  | arpp21           |
| ENSDARG00000069463  | 85.22846777 | 0.434682099  | 0.142548713 | 3.049358292  | 0.002293308 | 0.062879702 | alox12           | ZDB-GENE-030131-1452 | alox12           |
| ENSDARG00000092999  | 6.772974892 | -1.49794886  | 0.491489995 | -3.047770808 | 0.002305457 | 0.063118744 | tnni4b.1         | ZDB-GENE-090312-198  | tnni4b.1         |
| ENSDARG00000039929  | 899.6387279 | -0.497056579 | 0.16312115  | -3.047162049 | 0.002310131 | 0.063152743 | ckmt2b           | ZDB-GENE-040426-1654 | ckmt2b           |
| ENSDARG00000112959  | 360.547733  | -0.552023778 | 0.181410691 | -3.042950631 | 0.002342708 | 0.063948272 | CABZ01072309.1   |                      |                  |
| ENSDARG00000060796  | 507.003809  | -0.311550736 | 0.102412321 | -3.042121624 | 0.00234917  | 0.064029661 | slc20a2          | ZDB-GENE-060929-828  | slc20a2          |
| ENSDARG00000076611  | 16.82280025 | -0.651774132 | 0.214534561 | -3.038084541 | 0.002380872 | 0.064797742 | fbxo21           | ZDB-GENE-100922-229  | fbxo21           |
| ENSDARG00000029072  | 274.4042542 | -0.267729978 | 0.08821817  | -3.034862079 | 0.002406457 | 0.065397337 | klf6a            | ZDB-GENE-021115-9    | klf6a            |
| ENSDARG00000068995  | 204.5086963 | 0.562075218  | 0.185279848 | 3.033655436  | 0.002416102 | 0.065557346 | h2afx1           | ZDB-GENE-041010-42   | h2afx1           |
| ENSDARG00000032603  | 16.10225126 | -0.7025776   | 0.231626503 | -3.033234935 | 0.002419472 | 0.065557346 | st7l             | ZDB-GENE-080219-43   | st7l             |
| ENSDARG00000018069  | 35.59143277 | 0.814236053  | 0.268634122 | 3.031022447  | 0.002437271 | 0.065942525 | rdh12            | ZDB-GENE-040718-9    | rdh12            |
| ENSDARG00000027249  | 1532.794341 | -0.542390067 | 0.179089556 | -3.028596857 | 0.002456923 | 0.066304594 | btg1             | ZDB-GENE-010726-1    | btg1             |
| ENSDARG00000055138  | 56.79185686 | -0.571863045 | 0.188828311 | -3.028481486 | 0.002457861 | 0.066304594 | zgc:110410       | ZDB-GENE-050522-465  | zgc:110410       |
| ENSDARG00000003281  | 49.75440558 | -0.74560793  | 0.246438846 | -3.025529218 | 0.002481984 | 0.066857314 | pik3ip1          | ZDB-GENE-031030-14   | pik3ip1          |
| ENSDARG00000029689  | 6.879815536 | 1.25396362   | 0.414866742 | 3.022569645  | 0.002506384 | 0.067384655 | tkta             | ZDB-GENE-130530-578  | tkta             |
| ENSDARG00000043171  | 405.1333387 | 0.762432134  | 0.252297611 | 3.021955429  | 0.002511475 | 0.067384655 | zgc:112302       | ZDB-GENE-050626-127  | zgc:112302       |



|                    |             |               |             |              |             |             |                    |                      |                    |
|--------------------|-------------|---------------|-------------|--------------|-------------|-------------|--------------------|----------------------|--------------------|
| ENSDARG00000088411 | 42.64807464 | -0.932785702  | 0.308682791 | -3.021826054 | 0.002512549 | 0.067384655 | notum2             | ZDB-GENE-120215-77   | notum2             |
| ENSDARG00000057672 | 34.74389326 | 0.615406442   | 0.203722329 | 3.020809964  | 0.002520995 | 0.067512767 | plpp5              | ZDB-GENE-040704-54   | plpp5              |
| ENSDARG00000000001 | 9.197301379 | -0.853103786  | 0.282685033 | -3.017859757 | 0.002545667 | 0.068074387 | slc35a5            | ZDB-GENE-030616-55   | slc35a5            |
| ENSDARG00000052536 | 142.654189  | 0.339240538   | 0.112507655 | 3.015266292  | 0.002567537 | 0.068559579 | tia1               | ZDB-GENE-030131-1506 | tia1               |
| ENSDARG00000078479 | 91.26888372 | -0.351091784  | 0.116515889 | -3.013252409 | 0.002584638 | 0.068916201 | mocs1              | ZDB-GENE-130215-1    | mocs1              |
| ENSDARG00000019969 | 82.63512675 | 0.427541953   | 0.141998662 | 3.010887207  | 0.002604856 | 0.069354761 | smarcd3b           | ZDB-GENE-080509-2    | smarcd3b           |
| ENSDARG00000020956 | 1841.84982  | -0.364785306  | 0.12122654  | -3.009120817 | 0.002620049 | 0.069658471 | pck2               | ZDB-GENE-040426-2266 | pck2               |
| ENSDARG00000041586 | 20.0460186  | -0.575794415  | 0.191383986 | -3.008582002 | 0.0026247   | 0.069674259 | dhx40              | ZDB-GENE-080507-1    | dhx40              |
| ENSDARG00000070950 | 4.696313255 | -1.628082502  | 0.541294712 | -3.007756153 | 0.002631842 | 0.069674259 | styk1a             | ZDB-GENE-060503-428  | styk1a             |
| ENSDARG00000090346 | 219.1943805 | -0.618067894  | 0.205492634 | -3.007737468 | 0.002632004 | 0.069674259 | zmp:0000000991     | ZDB-GENE-130530-994  | zmp:0000000991     |
| ENSDARG00000002167 | 74.97990103 | 0.386414764   | 0.128530887 | 3.006396162  | 0.002643643 | 0.069881823 | cacnb1             | ZDB-GENE-040718-399  | cacnb1             |
| ENSDARG00000054916 | 255.852981  | -0.704418512  | 0.234729014 | -3.000986117 | 0.002691068 | 0.071033393 | eif4ebp3           | ZDB-GENE-041114-44   | eif4ebp3           |
| ENSDARG00000087401 | 12.1520907  | -0.858313449  | 0.286203363 | -2.998963528 | 0.002708997 | 0.071404202 | slc25a34           | ZDB-GENE-040426-1442 | slc25a34           |
| ENSDARG00000061424 | 146.5185276 | 0.27188325    | 0.090690199 | 2.997934209  | 0.002718163 | 0.071411501 | zmf646             | ZDB-GENE-160627-3    | zmf646             |
| ENSDARG00000033861 | 25.92738463 | -0.522856444  | 0.174418988 | -2.997703693 | 0.00272022  | 0.071411501 | sepsecs            | ZDB-GENE-040426-859  | sepsecs            |
| ENSDARG00000086481 | 144.6650626 | -0.589803666  | 0.19675696  | -2.997625424 | 0.002720919 | 0.071411501 | mogat3a            | ZDB-GENE-080305-11   | mogat3a            |
| ENSDARG00000051756 | 148.5685407 | -0.456402378  | 0.152339573 | -2.995954156 | 0.002735876 | 0.071701766 | pdhx               | ZDB-GENE-040426-1539 | pdhx               |
| ENSDARG00000116806 | 229.9759762 | -0.544073328  | 0.181644938 | -2.995257308 | 0.002742134 | 0.071729264 | CU693479.1         |                      |                    |
| ENSDARG00000034568 | 40.82190776 | -0.508487555  | 0.169780542 | -2.994969558 | 0.002744722 | 0.071729264 | fitm2              | ZDB-GENE-050508-5    | fitm2              |
| ENSDARG00000059090 | 27.34009975 | 0.693618416   | 0.231696251 | 2.993654034  | 0.002756583 | 0.071937047 | sstr2a             | ZDB-GENE-140130-1    | sstr2a             |
| ENSDARG00000036791 | 74.88442862 | 0.470190096   | 0.157271877 | 2.989664179  | 0.002792843 | 0.072780068 | dnmt3bb.1          | ZDB-GENE-050314-1    | dnmt3bb.1          |
| ENSDARG00000101578 | 85.44892078 | 0.328510494   | 0.110000637 | 2.986441729  | 0.002822446 | 0.073336908 | e2f4               | ZDB-GENE-040426-2773 | e2f4               |
| ENSDARG00000026865 | 101.8268415 | -0.369488819  | 0.123735351 | -2.986121726 | 0.002825402 | 0.073336908 | fam107b            | ZDB-GENE-031030-12   | fam107b            |
| ENSDARG00000040131 | 117.7491115 | -0.381109278  | 0.127630392 | -2.986038611 | 0.00282617  | 0.073336908 | zfyve26            | ZDB-GENE-030131-3286 | zfyve26            |
| ENSDARG00000074425 | 81.58294108 | -0.46576029   | 0.156078302 | -2.984145035 | 0.002843719 | 0.07368838  | si:busm1-57f23.1   | ZDB-GENE-030616-512  | si:busm1-57f23.1   |
| ENSDARG00000032079 | 14.08755243 | 0.837469081   | 0.280831329 | 2.982107032  | 0.002862719 | 0.07390729  | acsl3a             | ZDB-GENE-050420-181  | acsl3a             |
| ENSDARG00000103271 | 165.6894414 | -0.358217308  | 0.120122675 | -2.98209567  | 0.002862825 | 0.07390729  | pla2g15            | ZDB-GENE-030131-6948 | pla2g15            |
| ENSDARG00000100339 | 13.04042466 | 1.232132675   | 0.413210784 | 2.981850238  | 0.002865121 | 0.07390729  | arf4b              | ZDB-GENE-050417-205  | arf4b              |
| ENSDARG00000077298 | 98.89225758 | 0.35953426    | 0.12058799  | 2.981509684  | 0.00286831  | 0.07390729  | gas1a              | ZDB-GENE-050302-155  | gas1a              |
| ENSDARG00000058728 | 35.49148675 | -0.472298238  | 0.158431445 | -2.981088995 | 0.002872253 | 0.07390729  | nudt2              | ZDB-GENE-040718-7    | nudt2              |
| ENSDARG00000038305 | 4.352778643 | 1.454804168   | 0.488626966 | 2.977330908  | 0.0029077   | 0.074714892 | vgll3              | ZDB-GENE-130530-600  | vgll3              |
| ENSDARG00000075211 | 358.674554  | 0.33005827    | 0.111021163 | 2.972931106  | 0.002949707 | 0.075688564 | chd7               | ZDB-GENE-070912-179  | chd7               |
| ENSDARG00000099889 | 185.4128989 | -0.901056669  | 0.303238534 | -2.971445143 | 0.002964018 | 0.07594987  | dusp27             | ZDB-GENE-140513-1    | dusp27             |
| ENSDARG00000020328 | 419.381769  | -0.417350693  | 0.140492725 | -2.970621393 | 0.002971979 | 0.076047947 | plekha6            | ZDB-GENE-140106-14   | plekha6            |
| ENSDARG00000053091 | 119.6127953 | -0.468897526  | 0.158067697 | -2.966434858 | 0.003012742 | 0.076983921 | si:ch211-204c21.1  | ZDB-GENE-030429-35   | si:ch211-204c21.1  |
| ENSDARG00000105412 | 30.68312801 | 0.535722526   | 0.180705237 | 2.964620924  | 0.003030561 | 0.077095027 | si:ch211-276i12.11 | ZDB-GENE-160628-5    | si:ch211-276i12.11 |
| ENSDARG00000003142 | 49.08778013 | -0.60862342   | 0.205302457 | -2.964520879 | 0.003031547 | 0.077095027 | dachc              | ZDB-GENE-020402-5    | dachc              |
| ENSDARG00000070041 | 14.42470486 | 0.836356761   | 0.282135063 | 2.964384332  | 0.003032892 | 0.077095027 | zgc:153920         | ZDB-GENE-061013-702  | zgc:153920         |
| ENSDARG00000054060 | 272.8589841 | -0.319686189  | 0.107845895 | -2.964287042 | 0.003033851 | 0.077095027 | pof1b              | ZDB-GENE-030131-4287 | pof1b              |
| ENSDARG00000003797 | 15.06507826 | 0.787520458   | 0.265914366 | 2.961556648  | 0.003060882 | 0.077674626 | asb2a.1            | ZDB-GENE-030131-5355 | asb2a.1            |
| ENSDARG00000078133 | 133.9879718 | 0.293482558   | 0.099147043 | 2.960073742  | 0.003075654 | 0.07794199  | kdm2ab             | ZDB-GENE-101007-5    | kdm2ab             |
| ENSDARG00000071724 | 22.23020574 | -0.76656242   | 0.259567501 | -2.953229575 | 0.00314468  | 0.079581599 | ankha              | ZDB-GENE-050913-33   | ankha              |
| ENSDARG00000016868 | 45.6142404  | -0.6291110744 | 0.213083873 | -2.952408995 | 0.00315305  | 0.079638915 | rhobtb4            | ZDB-GENE-060315-11   | rhobtb4            |

|                     |             |              |             |              |             |             |                     |                      |                   |
|---------------------|-------------|--------------|-------------|--------------|-------------|-------------|---------------------|----------------------|-------------------|
| ENSDARG00000103025  | 1293.468916 | 1.053445253  | 0.356838907 | 2.952159171  | 0.003155602 | 0.079638915 | hmgcs1              | ZDB-GENE-040426-1042 | hmgcs1            |
| ENSDARG00000109390  | 76.56490175 | -1.726729864 | 0.585195771 | -2.950687528 | 0.003170675 | 0.079720939 | si:ch211-66i15.5    | ZDB-GENE-090313-122  | si:ch211-66i15.5  |
| ENSDARG00000098837  | 13.72558487 | -1.708205842 | 0.57897308  | -2.950406332 | 0.003173563 | 0.079720939 | tgm5l               | ZDB-GENE-110411-176  | tgm5l             |
| ENSDARG00000011493  | 22.96261292 | 0.537525507  | 0.182194601 | 2.950282305  | 0.003174837 | 0.079720939 | dcun1d3             | ZDB-GENE-070928-2    | dcun1d3           |
| ENSDARG00000043085  | 3.873172257 | 1.31529464   | 0.445839743 | 2.950151171  | 0.003176185 | 0.079720939 | alox5b.1            | ZDB-GENE-131219-3    | alox5b.1          |
| ENSDARG00000030125  | 19.57491713 | 0.770211353  | 0.261534879 | 2.9449661    | 0.0032299   | 0.080958732 | sox7                | ZDB-GENE-040109-4    | sox7              |
| ENSDARG00000017762  | 109.4184368 | 0.384538216  | 0.130663112 | 2.942974561  | 0.003250751 | 0.081086456 | srrt                | ZDB-GENE-020419-13   | srrt              |
| ENSDARG00000067713  | 90.57403036 | 0.330416321  | 0.112275093 | 2.942917357  | 0.003251352 | 0.081086456 | snx18a              |                      |                   |
| ENSDARG00000035256  | 3202.656276 | -0.477136123 | 0.162136764 | -2.942800338 | 0.003252581 | 0.081086456 | eef2l2              | ZDB-GENE-030131-8112 | eef2l2            |
| ENSDARG00000017489  | 43.25759711 | 1.659247923  | 0.563852153 | 2.942700341  | 0.003253632 | 0.081086456 | ifi45               | ZDB-GENE-051030-98   | ifi45             |
| ENSDARG00000061858  | 792.9546191 | -0.621485143 | 0.211218743 | -2.942376864 | 0.003257033 | 0.081086456 | zgc:153968          | ZDB-GENE-061027-211  | zgc:153968        |
| ENSDARG00000056929  | 372.8878709 | 0.275666549  | 0.093724278 | 2.941250169  | 0.003268904 | 0.081272025 | kdm6bb              | ZDB-GENE-040724-166  | kdm6bb            |
| ENSDARG00000087709  | 7.602806981 | -1.222960945 | 0.415928656 | -2.940314225 | 0.003278796 | 0.081407935 | fat3b               | ZDB-GENE-130530-969  | fat3b             |
| ENSDARG00000021866  | 92.79452445 | -0.555116455 | 0.188861485 | -2.939278254 | 0.003289776 | 0.081570479 | upk1a               | ZDB-GENE-060421-2603 | upk1a             |
| ENSDARG00000021208  | 528.80523   | -0.378400406 | 0.128834573 | -2.937102967 | 0.003312941 | 0.082034301 | serpind1            | ZDB-GENE-030711-2    | serpind1          |
| ENSDARG00000026369  | 3450.643843 | 0.561929785  | 0.191459302 | 2.934982937  | 0.00333566  | 0.082394452 | dbi                 | ZDB-GENE-040426-1861 | dbi               |
| ENSDARG00000061566  | 49.93191153 | 0.608855081  | 0.207452713 | 2.934910195  | 0.003336442 | 0.082394452 | slc7a3b             | ZDB-GENE-120813-6    | slc7a3b           |
| ENSDARG00000030957  | 110.7658168 | -0.27375858  | 0.093369287 | -2.931998184 | 0.003367887 | 0.083042475 | yipf4               | ZDB-GENE-040426-2253 | yipf4             |
| ENSDARG00000058094  | 294.2737347 | -0.387564098 | 0.132208491 | -2.931461472 | 0.003373712 | 0.083042475 | ciarta              | ZDB-GENE-030131-7016 | ciarta            |
| ENSDARG00000041546  | 51.73184036 | 0.390803832  | 0.133324166 | 2.931230277  | 0.003376224 | 0.083042475 | gypc                | ZDB-GENE-030131-7930 | gypc              |
| ENSDARG00000105498  | 9.376054523 | -0.958415614 | 0.327078921 | -2.930227395 | 0.00338714  | 0.083199745 | TSC22D3 (1 of many) | ZDB-GENE-160114-28   | si:ch211-220e11.3 |
| ENSDARG00000079281  | 89.52749545 | -0.479744756 | 0.163750847 | -2.929723817 | 0.003392634 | 0.083223572 | si:dkeyp-75h12.2    | ZDB-GENE-030131-7512 | si:dkeyp-75h12.2  |
| ENSDARG00000000631  | 89.5307744  | 0.276048865  | 0.094268775 | 2.928317083  | 0.003408023 | 0.083489755 | ptpn4a              | ZDB-GENE-030616-449  | ptpn4a            |
| ENSDARG000000031737 | 7.831463528 | 1.139329354  | 0.389249167 | 2.9269924    | 0.003422572 | 0.083734691 | pthlha              | ZDB-GENE-050119-9    | pthlha            |
| ENSDARG00000073786  | 141.7885006 | 0.434159541  | 0.148352666 | 2.926536827  | 0.003427589 | 0.083746065 | cmb1                | ZDB-GENE-071004-21   | cmb1              |
| ENSDARG00000004378  | 91.12454969 | 0.293428783  | 0.100321863 | 2.924873741  | 0.00344596  | 0.084083253 | yrk                 | ZDB-GENE-030131-9517 | yrk               |
| ENSDARG00000078547  | 10.28062307 | -1.803932632 | 0.617821418 | -2.919828577 | 0.00350224  | 0.08534332  | si:ch211-264f5.2    | ZDB-GENE-080303-2    | si:ch211-264f5.2  |
| ENSDARG00000055502  | 205.8998881 | 0.298123616  | 0.10215457  | 2.918358109  | 0.0035188   | 0.085609866 | cicb                | ZDB-GENE-030131-1966 | cicb              |
| ENSDARG00000068710  | 853.2601085 | -0.345719928 | 0.118486536 | -2.917799257 | 0.003525112 | 0.085609866 | nid1a               | ZDB-GENE-050302-58   | nid1a             |
| ENSDARG00000034677  | 101.6277108 | -0.723286589 | 0.24792604  | -2.917348212 | 0.003530214 | 0.085609866 | scel                | ZDB-GENE-030616-15   | scel              |
| ENSDARG00000075850  | 76.06051781 | -0.4474649   | 0.153388018 | -2.917208953 | 0.003531791 | 0.085609866 | gnal2               | ZDB-GENE-040718-441  | gnal2             |
| ENSDARG00000093546  | 12.98395938 | 0.67810074   | 0.232837705 | 2.912332177  | 0.003587409 | 0.086843623 | si:ch73-56d11.5     |                      |                   |
| ENSDARG00000075436  | 115.9453294 | -0.38145326  | 0.13099826  | -2.911895629 | 0.003592427 | 0.086850805 | sytl2b              | ZDB-GENE-121214-363  | sytl2b            |
| ENSDARG00000017386  | 33.42613026 | -0.701542919 | 0.241012888 | -2.910810811 | 0.003604922 | 0.087038529 | sobpb               | ZDB-GENE-041210-8    | sobpb             |
| ENSDARG00000090870  | 40.26331531 | 5.821972647  | 2.000795382 | 2.909829111  | 0.003616264 | 0.087197942 | si:ch1073-263o8.2   | ZDB-GENE-030131-5362 | si:ch1073-263o8.2 |
| ENSDARG00000099974  | 2270.543087 | -0.391523531 | 0.134642292 | -2.907879278 | 0.003638888 | 0.08762861  | ldb3b               | ZDB-GENE-030131-6032 | ldb3b             |
| ENSDARG00000076005  | 95.72657106 | 0.301227855  | 0.103706767 | 2.904611365  | 0.003677094 | 0.088432901 | piezo2a.2           | ZDB-GENE-131119-76   | piezo2a.2         |
| ENSDARG00000078674  | 49.55660542 | -0.764562176 | 0.2633588   | -2.903119913 | 0.003694651 | 0.08873916  | hspb9               | ZDB-GENE-080214-6    | hspb9             |
| ENSDARG00000079473  | 83.32364093 | 0.401345188  | 0.138268768 | 2.902645292  | 0.003700255 | 0.088757871 | map3k21             | ZDB-GENE-090312-24   | map3k21           |
| ENSDARG00000019406  | 23.28194938 | -0.650687764 | 0.224284449 | -2.90117201  | 0.003717697 | 0.089060153 | zgc:63470           | ZDB-GENE-040426-1126 | zgc:63470         |
| ENSDARG00000020596  | 56.79634056 | -0.379557088 | 0.131003731 | -2.897299828 | 0.003763898 | 0.09004968  | miga1               | ZDB-GENE-041010-193  | miga1             |
| ENSDARG000000053820 | 6.972760468 | -1.146382268 | 0.395786767 | -2.896464369 | 0.003773935 | 0.090172539 | pcmt2a              | ZDB-GENE-060312-14   | pcmt2a            |
| ENSDARG000000021924 | 18.4373735  | 1.36410861   | 0.471024984 | 2.896043004  | 0.003779006 | 0.090176594 | hsp70.3             | ZDB-GENE-110713-1    | hsp70.3           |

|                     |             |              |             |              |             |             |                  |                      |                  |
|---------------------|-------------|--------------|-------------|--------------|-------------|-------------|------------------|----------------------|------------------|
| ENSDARG00000053829  | 9.609557307 | 0.904768155  | 0.312479203 | 2.895450792  | 0.003786144 | 0.090229889 | pax9             | ZDB-GENE-980526-399  | pax9             |
| ENSDARG00000058597  | 172.4200347 | -0.330591056 | 0.114213315 | -2.894505397 | 0.003797564 | 0.090384966 | nt5c3a           | ZDB-GENE-030131-439  | nt5c3a           |
| ENSDARG00000006220  | 1377.352279 | 0.438726825  | 0.151754312 | 2.891033666  | 0.00383977  | 0.091271428 | ugt1a7           | ZDB-GENE-071004-5    | ugt1a2           |
| ENSDARG00000006220  | 1377.352279 | 0.438726825  | 0.151754312 | 2.891033666  | 0.00383977  | 0.091271428 | ugt1a7           | ZDB-GENE-071004-4    | ugt1a1           |
| ENSDARG00000006220  | 1377.352279 | 0.438726825  | 0.151754312 | 2.891033666  | 0.00383977  | 0.091271428 | ugt1a7           | ZDB-GENE-080227-5    | ugt1a6           |
| ENSDARG00000006220  | 1377.352279 | 0.438726825  | 0.151754312 | 2.891033666  | 0.00383977  | 0.091271428 | ugt1a7           | ZDB-GENE-080227-6    | ugt1a7           |
| ENSDARG00000039677  | 365.3452885 | -0.411057594 | 0.142204403 | -2.890610873 | 0.003844939 | 0.091276366 | dsc2l            | ZDB-GENE-031116-55   | dsc2l            |
| ENSDARG00000040747  | 2452.460051 | -0.578444104 | 0.200150958 | -2.890039143 | 0.003851939 | 0.091324699 | tm4sf4           | ZDB-GENE-040801-231  | tm4sf4           |
| ENSDARG00000111934  | 3.779319427 | 1.361605643  | 0.471466017 | 2.888025001  | 0.003876691 | 0.091793248 | ano9a            | ZDB-GENE-071004-46   | ano9a            |
| ENSDARG00000111934  | 3.779319427 | 1.361605643  | 0.471466017 | 2.888025001  | 0.003876691 | 0.091793248 | ano9a            | ZDB-GENE-050522-106  | zgc:112234       |
| ENSDARG00000102029  | 4.087135747 | -1.310883573 | 0.454246174 | -2.885843953 | 0.003903657 | 0.092312948 | si:dkey-183c6.7  | ZDB-GENE-160728-81   | si:dkey-183c6.7  |
| ENSDARG00000091513  | 45.70998562 | 0.399511384  | 0.138541391 | 2.883696921  | 0.003930368 | 0.092787812 | C3orf70          |                      |                  |
| ENSDARG00000042866  | 48.88663001 | -0.536570382 | 0.186151457 | -2.882439874 | 0.003946084 | 0.092787812 | cx35.4           | ZDB-GENE-050417-174  | cx35.4           |
| ENSDARG00000052115  | 18.69260428 | 0.867391624  | 0.300958235 | 2.88209965   | 0.003950348 | 0.092787812 | ehf              | ZDB-GENE-060312-7    | ehf              |
| ENSDARG00000036966  | 281.6276804 | 0.506943841  | 0.175909554 | 2.881843707  | 0.003953558 | 0.092787812 | hsd3b7           | ZDB-GENE-030131-5673 | hsd3b7           |
| ENSDARG00000015176  | 20.1366299  | 0.672617666  | 0.233413361 | 2.881658799  | 0.003955878 | 0.092787812 | ror1             | ZDB-GENE-030131-6104 | ror1             |
| ENSDARG00000098742  | 8.39629881  | -0.976335737 | 0.338823679 | -2.88154517  | 0.003957305 | 0.092787812 | lrm1             | ZDB-GENE-161221-2    | lrm1             |
| ENSDARG00000020123  | 220.7877987 | -0.406303046 | 0.141023147 | -2.881108911 | 0.003962787 | 0.092787812 | coq8a            | ZDB-GENE-040718-487  | coq8a            |
| ENSDARG00000033845  | 66.27410513 | -0.606825257 | 0.21063582  | -2.880921475 | 0.003965144 | 0.092787812 | igsf9ba          | ZDB-GENE-060503-729  | igsf9ba          |
| ENSDARG00000012981  | 35.31998732 | -0.749605654 | 0.260225078 | -2.880604975 | 0.003969128 | 0.092787812 | osbp17           | ZDB-GENE-041010-212  | osbp17           |
| ENSDARG00000068088  | 342.8982021 | -0.70310577  | 0.244135833 | -2.87997776  | 0.003977032 | 0.092854618 | tcnba            | ZDB-GENE-060531-123  | tcnba            |
| ENSDARG00000045522  | 47.70394502 | -0.550520375 | 0.191215993 | -2.879049841 | 0.003988753 | 0.093010236 | acot15           | ZDB-GENE-041210-203  | acot15           |
| ENSDARG00000077537  | 89.84819976 | -0.315297293 | 0.109651438 | -2.875450601 | 0.004034513 | 0.093865031 | nudt19           | ZDB-GENE-081022-80   | nudt19           |
| ENSDARG000000103952 | 4.256763655 | 1.34715139   | 0.468556021 | 2.875112748  | 0.004038832 | 0.093865031 | CABZ01054391.1   |                      |                  |
| ENSDARG00000004105  | 91.02328325 | 0.334160494  | 0.116237838 | 2.874799636  | 0.00404284  | 0.093865031 | tie1             | ZDB-GENE-990415-55   | tie1             |
| ENSDARG00000063899  | 12765.10769 | -0.352933913 | 0.122788274 | -2.874329129 | 0.004048868 | 0.093865031 | mt-nd2           | ZDB-GENE-011205-8    | mt-nd2           |
| ENSDARG00000077226  | 406.3152603 | 0.214893191  | 0.074767067 | 2.874169071  | 0.00405092  | 0.093865031 | smarca4a         | ZDB-GENE-030605-1    | smarca4a         |
| ENSDARG00000013414  | 27.85692304 | 0.524572907  | 0.182704119 | 2.871160813  | 0.004089674 | 0.094527899 | lin7a            | ZDB-GENE-040426-1665 | lin7a            |
| ENSDARG00000025478  | 3.506180375 | 1.274887579  | 0.444033653 | 2.871150804  | 0.004089804 | 0.094527899 | gipr             | ZDB-GENE-050516-4    | gipr             |
| ENSDARG00000103917  | 212.0675175 | -0.731822573 | 0.254943672 | -2.870526523 | 0.004097888 | 0.094595918 | znf185           | ZDB-GENE-061103-355  | znf185           |
| ENSDARG00000104500  | 86.89912946 | -0.484188518 | 0.168803198 | -2.86836105  | 0.004126044 | 0.09512651  | fyco1a           | ZDB-GENE-110411-276  | fyco1a           |
| ENSDARG00000036239  | 3057.463027 | -0.39891241  | 0.139139298 | -2.867000307 | 0.004143826 | 0.095410039 | gatm             | ZDB-GENE-021015-1    | gatm             |
| ENSDARG000000102696 | 13.17611243 | 1.000939328  | 0.349169685 | 2.866627237  | 0.004148714 | 0.095410039 | dnajc11b         | ZDB-GENE-160114-27   | dnajc11b         |
| ENSDARG00000052348  | 155.9752328 | 0.466357193  | 0.162932251 | 2.862276754  | 0.004206095 | 0.096512619 | smarca5          | ZDB-GENE-021125-1    | smarca5          |
| ENSDARG00000022260  | 63.92876155 | -0.360323842 | 0.125890635 | -2.862197341 | 0.004207149 | 0.096512619 | si:ch211-57i17.1 | ZDB-GENE-041014-259  | si:ch211-57i17.1 |
| ENSDARG00000071500  | 55.89168998 | -0.469827095 | 0.164444083 | -2.85706294  | 0.00427581  | 0.097880322 | fam207a          | ZDB-GENE-060825-113  | fam207a          |
| ENSDARG00000071347  | 59.6412166  | 0.408390124  | 0.142946479 | 2.856944263  | 0.004277409 | 0.097880322 | aftphb           | ZDB-GENE-060503-388  | aftphb           |
| ENSDARG00000046019  | 24.67600496 | 0.571127217  | 0.199953398 | 2.856301628  | 0.004286077 | 0.097956835 | snai1b           | ZDB-GENE-980526-514  | snai1b           |
| ENSDARG00000014916  | 410.1817727 | -0.579687674 | 0.203037285 | -2.85507991  | 0.0043026   | 0.098212454 | slc10a2          | ZDB-GENE-040426-1328 | slc10a2          |
| ENSDARG00000059337  | 75.34587244 | 0.423426852  | 0.148454375 | 2.85223559   | 0.004341291 | 0.098972833 | tgif1            | ZDB-GENE-030131-475  | tgif1            |
| ENSDARG00000088967  | 68.72253742 | -0.515647387 | 0.180846951 | -2.851291578 | 0.004354202 | 0.09914432  | wnk4b            | ZDB-GENE-131120-119  | wnk4b            |
| ENSDARG00000014674  | 95.84308269 | 0.37152207   | 0.130376407 | 2.849611195  | 0.00437727  | 0.099546375 | acsl3b           | ZDB-GENE-030131-492  | acsl3b           |
| ENSDARG00000105012  | 35.29549832 | -0.542934075 | 0.190558814 | -2.849167999 | 0.004383373 | 0.099562089 | utp23            | ZDB-GENE-050417-353  | utp23            |

|                    |             |              |             |              |             |             |          |                    |          |
|--------------------|-------------|--------------|-------------|--------------|-------------|-------------|----------|--------------------|----------|
| ENSDARG00000113928 | 5.981808757 | -1.097037962 | 0.385198323 | -2.847982185 | 0.004399739 | 0.099810596 | B3GAT1   |                    |          |
| ENSDARG00000075132 | 582.9377265 | -0.292289368 | 0.102652256 | -2.847374037 | 0.004408154 | 0.099855885 | fh       | ZDB-GENE-010724-6  | fh       |
| ENSDARG00000102362 | 174.7170902 | -0.320063403 | 0.112419162 | -2.847053816 | 0.00441259  | 0.099855885 | slc25a12 | ZDB-GENE-031006-11 | slc25a12 |
