# Supplementary material
Source: publisher figshare collection journal article supplement (https://gsajournals.figshare.com/articles/dataset/_/13236983)
Supplement: Supplementary file 4 [file 1]

| Supplemental Table S7: 35dpf trunk RNA-seq data, genes differentially expressed between <i>nr5a1b</i> mutants and wildtypes. |             |                |             |              |             |             |                   |                      |                   |
|------------------------------------------------------------------------------------------------------------------------------|-------------|----------------|-------------|--------------|-------------|-------------|-------------------|----------------------|-------------------|
| EnsemblID                                                                                                                    | baseMean    | log2FoldChange | lfcSE       | stat         | pvalue      | padj        | EnsemblGeneName   | ZFIN_ID              | ZFIN_Name         |
| ENSDARG00000103024                                                                                                           | 8.506805503 | -49.32999122   | 4.263613685 | -11.56999552 | 5.84857E-31 | 1.29347E-26 | zgc:175136        | ZDB-GENE-080204-122  | zgc:175136        |
| ENSDARG00000045424                                                                                                           | 21.77831196 | -25.98322449   | 2.350123005 | -11.05611257 | 2.04782E-28 | 2.26448E-24 | zgc:173856        | ZDB-GENE-030131-5358 | zgc:173856        |
| ENSDARG00000092924                                                                                                           | 26.87528586 | -26.4261695    | 2.633508164 | -10.03458803 | 1.07407E-23 | 7.91803E-20 | zgc:171474        | ZDB-GENE-080215-16   | zgc:171474        |
| ENSDARG00000028367                                                                                                           | 24.46912077 | -3.375835036   | 0.359690536 | -9.385387443 | 6.26855E-21 | 3.46588E-17 | sult2st3          | ZDB-GENE-061117-4    | sult2st3          |
| ENSDARG00000006580                                                                                                           | 8.787611977 | -37.02369314   | 4.209126735 | -8.796050932 | 1.41715E-18 | 6.26835E-15 | clndnd            | ZDB-GENE-010328-4    | clndnd            |
| ENSDARG00000078394                                                                                                           | 4.975737802 | -40.27222138   | 4.869228061 | -8.270760964 | 1.33107E-16 | 4.90631E-13 | CABZ01059627.1    |                      |                   |
| ENSDARG00000093704                                                                                                           | 4.751079804 | -23.88867713   | 3.237535043 | -7.378662103 | 1.59888E-13 | 5.05155E-10 | si:dkeyp-46h3.8   | ZDB-GENE-060503-183  | si:dkeyp-46h3.8   |
| ENSDARG00000079034                                                                                                           | 21.34392507 | -5.487421663   | 0.752102075 | -7.296112919 | 2.962E-13   | 8.18846E-10 | si:dkey-19b23.11  | ZDB-GENE-030131-6199 | si:dkey-19b23.11  |
| ENSDARG00000007465                                                                                                           | 7.343648742 | -4.78059209    | 0.67478282  | -7.08463812  | 1.39408E-12 | 3.42572E-09 | tldr1             | ZDB-GENE-070803-1    | tldr1             |
| ENSDARG00000041699                                                                                                           | 9.842091584 | -4.496921113   | 0.642838477 | -6.995413737 | 2.64477E-12 | 5.84918E-09 | piwil1            | ZDB-GENE-030813-2    | piwil1            |
| ENSDARG00000070052                                                                                                           | 9.515912892 | -3.813489118   | 0.554283239 | -6.880036861 | 5.98371E-12 | 1.20305E-08 | tldr6             | ZDB-GENE-041001-210  | tldr6             |
| ENSDARG00000036180                                                                                                           | 11.6321778  | -4.105554778   | 0.620927241 | -6.611974003 | 3.79229E-11 | 6.98918E-08 | ccnb2             | ZDB-GENE-030429-12   | ccnb2             |
| ENSDARG00000075301                                                                                                           | 15.78589951 | -2.391359814   | 0.368600692 | -6.487670443 | 8.71737E-11 | 1.48303E-07 | gsdf              | ZDB-GENE-101029-3    | gsdf              |
| ENSDARG00000096095                                                                                                           | 9.562828454 | -6.108891391   | 0.946176597 | -6.456396626 | 1.07225E-10 | 1.69385E-07 | buc               | ZDB-GENE-070117-694  | buc               |
| ENSDARG00000074289                                                                                                           | 16.57294797 | -4.750133618   | 0.747730221 | -6.352737239 | 2.11517E-10 | 3.1186E-07  | tuba4l            | ZDB-GENE-030131-5588 | tuba4l            |
| ENSDARG00000069758                                                                                                           | 3.849424386 | -6.458331796   | 1.033608715 | -6.248333339 | 4.14856E-10 | 5.70142E-07 | si:dkey-189g17.2  | ZDB-GENE-030131-5562 | si:dkey-189g17.2  |
| ENSDARG00000008454                                                                                                           | 9.086910879 | -5.971852599   | 0.957065051 | -6.239756213 | 4.38253E-10 | 5.70142E-07 | cpeb1b            | ZDB-GENE-990927-1    | cpeb1b            |
| ENSDARG00000014373                                                                                                           | 7.630342945 | -5.225069094   | 0.842348196 | -6.202980094 | 5.54038E-10 | 6.80729E-07 | ddx4              | ZDB-GENE-990415-272  | ddx4              |
| ENSDARG00000020749                                                                                                           | 8.084687246 | -5.954155087   | 0.967504307 | -6.154138071 | 7.54869E-10 | 8.78668E-07 | caprin2           | ZDB-GENE-040812-2    | caprin2           |
| ENSDARG00000069251                                                                                                           | 24.82923085 | -8.831184505   | 1.446191219 | -6.106512328 | 1.01832E-09 | 1.12606E-06 | si:dkeyp-50f7.2   | ZDB-GENE-030131-5968 | si:dkeyp-50f7.2   |
| ENSDARG00000036214                                                                                                           | 1.847073678 | -5.956730395   | 0.992770763 | -6.000106588 | 1.97188E-09 | 2.07667E-06 | dazl              | ZDB-GENE-000405-6    | dazl              |
| ENSDARG00000033566                                                                                                           | 5.085319212 | -2.371273197   | 0.397346706 | -5.967768602 | 2.4052E-09  | 2.33449E-06 | cyp17a1           | ZDB-GENE-040213-2    | cyp17a1           |
| ENSDARG00000092885                                                                                                           | 21.33582157 | -25.9501906    | 4.349503598 | -5.966241897 | 2.4278E-09  | 2.33449E-06 | zgc:171977        | ZDB-GENE-070822-24   | zgc:171977        |
| ENSDARG00000070709                                                                                                           | 30.584484   | -8.597416243   | 1.444800478 | -5.950590669 | 2.67177E-09 | 2.46203E-06 | wu:fi42e03        | ZDB-GENE-030131-6284 | wu:fi42e03        |
| ENSDARG00000014039                                                                                                           | 4.000310908 | -5.235135678   | 0.883015024 | -5.9287051   | 3.05333E-09 | 2.7011E-06  | si:dkeyp-93d12.1  | ZDB-GENE-041014-303  | si:dkeyp-93d12.1  |
| ENSDARG00000056387                                                                                                           | 4.087708094 | -4.910549177   | 0.830805571 | -5.910587683 | 3.40889E-09 | 2.80054E-06 | rnf17             | ZDB-GENE-030131-6451 | rnf17             |
| ENSDARG00000043963                                                                                                           | 27.98078069 | -2.161885235   | 0.366057233 | -5.90586674  | 3.50797E-09 | 2.80054E-06 | si:ch211-241j12.3 | ZDB-GENE-040724-72   | si:ch211-241j12.3 |
| ENSDARG00000008835                                                                                                           | 5.383861129 | -23.90514949   | 4.048902238 | -5.904106367 | 3.54563E-09 | 2.80054E-06 | si:dkey-46g23.5   | ZDB-GENE-030131-9306 | si:dkey-46g23.5   |
| ENSDARG00000039828                                                                                                           | 9.65399588  | -5.966974188   | 1.025046693 | -5.821173051 | 5.8436E-09  | 4.45645E-06 | zp3b              | ZDB-GENE-031124-2    | zp3b              |
| ENSDARG00000100528                                                                                                           | 4.811134859 | -5.592361486   | 0.964282775 | -5.799503663 | 6.65115E-09 | 4.90323E-06 | map1lc3c          | ZDB-GENE-040426-1080 | map1lc3c          |
| ENSDARG00000099060                                                                                                           | 24.91848828 | -9.286371317   | 1.618070605 | -5.739163228 | 9.51455E-09 | 6.78786E-06 | zgc:111868        | ZDB-GENE-050809-138  | zgc:111868        |
| ENSDARG00000037995                                                                                                           | 6.38186848  | -5.107496778   | 0.890860236 | -5.733218943 | 9.85423E-09 | 6.8105E-06  | gdf3              | ZDB-GENE-980526-389  | gdf3              |
| ENSDARG00000094055                                                                                                           | 8.339087859 | -3.41534121    | 0.596337596 | -5.727194181 | 1.02105E-08 | 6.84291E-06 | si:dkey-88l16.3   | ZDB-GENE-030131-6015 | si:dkey-88l16.3   |
| ENSDARG00000026787                                                                                                           | 15.49249049 | -1.436656262   | 0.251965468 | -5.701798242 | 1.1855E-08  | 7.71134E-06 | aqp7              | ZDB-GENE-030131-6461 | aqp7              |
| ENSDARG00000090870                                                                                                           | 40.26331531 | -11.59477928   | 2.050021706 | -5.655930007 | 1.55005E-08 | 9.79452E-06 | si:ch1073-263o8.2 | ZDB-GENE-030131-5362 | si:ch1073-263o8.2 |
| ENSDARG00000062601                                                                                                           | 5.403200956 | -3.917126352   | 0.695950546 | -5.628455032 | 1.81831E-08 | 1.11705E-05 | piwil2            | ZDB-GENE-060526-345  | piwil2            |
| ENSDARG00000097559                                                                                                           | 8.300124602 | -2.279577544   | 0.407541539 | -5.593485142 | 2.22556E-08 | 1.33029E-05 | cyp8b3            | ZDB-GENE-040912-153  | cyp8b3            |
| ENSDARG00000075191                                                                                                           | 16.82518752 | 2.025943633    | 0.364124846 | 5.563870898  | 2.63855E-08 | 1.53564E-05 | oacyl             | ZDB-GENE-090710-2    | oacyl             |
| ENSDARG00000051854                                                                                                           | 15.15447836 | -2.449745133   | 0.442686141 | -5.533819352 | 3.13332E-08 | 1.77683E-05 | cdt1              | ZDB-GENE-070111-1    | cdt1              |
| ENSDARG00000013453                                                                                                           | 4.703768791 | -3.730422015   | 0.676713224 | -5.512559657 | 3.53652E-08 | 1.95534E-05 | tldr9             |                      |                   |
| ENSDARG00000092052                                                                                                           | 26.05752373 | -2.170402987   | 0.394107238 | -5.507138106 | 3.64714E-08 | 1.96732E-05 | gstk4             | ZDB-GENE-060421-6530 | gstk4             |
| ENSDARG00000039208                                                                                                           | 103.3672746 | -1.730918556   | 0.315841159 | -5.480345129 | 4.24497E-08 | 2.23528E-05 | nasp              | ZDB-GENE-030131-5511 | nasp              |
| ENSDARG00000015657                                                                                                           | 14.01905667 | -2.5381197     | 0.46429625  | -5.466595298 | 4.58762E-08 | 2.35953E-05 | zgc:77112         | ZDB-GENE-040426-2219 | zgc:77112         |
| ENSDARG00000115978                                                                                                           | 13.24877026 | -4.304730181   | 0.78846996  | -5.459599481 | 4.7721E-08  | 2.39863E-05 | AL935186.9        |                      |                   |
| ENSDARG00000003701                                                                                                           | 5.354620319 | -7.153576715   | 1.312189671 | -5.451633155 | 4.99093E-08 | 2.45288E-05 | clndng            | ZDB-GENE-010328-7    | clndng            |
| ENSDARG00000019706                                                                                                           | 9.293315543 | -5.441976112   | 1.001776046 | -5.43232805  | 5.56235E-08 | 2.67428E-05 | zar1              | ZDB-GENE-030818-1    | zar1              |
| ENSDARG00000037532                                                                                                           | 4.291787297 | -4.822290583   | 0.892909793 | -5.400646988 | 6.6401E-08  | 3.12452E-05 | mcm3l             | ZDB-GENE-040121-2    | mcm3l             |

|                    |             |              |             |              |             |             |                   |                      |                   |
|--------------------|-------------|--------------|-------------|--------------|-------------|-------------|-------------------|----------------------|-------------------|
| ENSDARG0000002745  | 1090.714489 | 0.481884404  | 0.089833816 | 5.36417604   | 8.13196E-08 | 3.69173E-05 | tdh               | ZDB-GENE-040426-2379 | tdh               |
| ENSDARG00000023479 | 9.768034571 | -6.276005807 | 1.170683872 | -5.360974007 | 8.27744E-08 | 3.69173E-05 | lrp13             | ZDB-GENE-130729-1    | lrp13             |
| ENSDARG0000000887  | 4.401186429 | -3.54186814  | 0.660860663 | -5.359477931 | 8.34628E-08 | 3.69173E-05 | zgc:56699         | ZDB-GENE-040426-2099 | zgc:56699         |
| ENSDARG00000055523 | 163.2827773 | 1.058710971  | 0.198398996 | 5.336271808  | 9.48771E-08 | 4.11432E-05 | slc22a6l          | ZDB-GENE-040426-2249 | slc22a6l          |
| ENSDARG00000055250 | 7.502568723 | -7.109736488 | 1.35491929  | -5.247350554 | 1.54302E-07 | 6.56259E-05 | si:ch211-132b12.8 | ZDB-GENE-030131-5453 | si:ch211-132b12.8 |
| ENSDARG00000095281 | 45.24238569 | -9.999437693 | 1.907365192 | -5.242539675 | 1.58381E-07 | 6.60898E-05 | zgc:152652        | ZDB-GENE-060818-27   | zgc:152652        |
| ENSDARG00000008541 | 14.6036298  | -2.559287557 | 0.490891075 | -5.213554878 | 1.85256E-07 | 7.58725E-05 | chia.4            | ZDB-GENE-030131-9279 | chia.4            |
| ENSDARG00000071450 | 3.622310297 | -3.97154615  | 0.767231365 | -5.176464791 | 2.2613E-07  | 9.00299E-05 | tdrd5             | ZDB-GENE-050208-502  | tdrd5             |
| ENSDARG00000032808 | 2.815566552 | -5.54556971  | 1.071714308 | -5.174485091 | 2.2854E-07  | 9.00299E-05 | tdrd7a            | ZDB-GENE-040426-2103 | tdrd7a            |
| ENSDARG00000056462 | 7.944938204 | -4.889388909 | 0.945421447 | -5.171650089 | 2.32036E-07 | 9.00299E-05 | crp2              | ZDB-GENE-030131-5826 | crp2              |
| ENSDARG00000056339 | 2.094263541 | -4.601197878 | 0.900764356 | -5.108103853 | 3.25408E-07 | 0.000124081 | stk31             | ZDB-GENE-140106-59   | stk31             |
| ENSDARG00000078638 | 15.44667221 | -25.51123501 | 5.042430299 | -5.059313366 | 4.20769E-07 | 0.000156586 | zgc:171750        | ZDB-GENE-071004-30   | zgc:171750        |
| ENSDARG00000017602 | 144.1515917 | 0.88589216   | 0.175164431 | 5.057488859  | 4.24813E-07 | 0.000156586 | ccng2             | ZDB-GENE-021016-1    | ccng2             |
| ENSDARG00000095486 | 5.762329285 | -30.14994636 | 5.970611435 | -5.049725089 | 4.42446E-07 | 0.000160412 | CU467646.2        |                      |                   |
| ENSDARG00000115817 | 13.85680544 | -30.11580358 | 5.970314145 | -5.04425778  | 4.55285E-07 | 0.000162405 | si:dkey-46g23.2   | ZDB-GENE-070705-476  | si:dkey-46g23.2   |
| ENSDARG00000090768 | 16.57710413 | -9.19015996  | 1.834149504 | -5.010583893 | 5.42651E-07 | 0.000190496 | zp3.2             | ZDB-GENE-071004-54   | zgc:173556        |
| ENSDARG00000090768 | 16.57710413 | -9.19015996  | 1.834149504 | -5.010583893 | 5.42651E-07 | 0.000190496 | zp3.2             | ZDB-GENE-050626-121  | zp3.2             |
| ENSDARG00000060112 | 5.556578412 | -3.262302576 | 0.655612408 | -4.975962221 | 6.49243E-07 | 0.000224354 | sybu              | ZDB-GENE-060929-1202 | sybu              |
| ENSDARG00000019208 | 9.701048629 | -2.01964356  | 0.407146814 | -4.960479836 | 7.03193E-07 | 0.000239259 | camsap1a          | ZDB-GENE-060518-4    | camsap1a          |
| ENSDARG00000035957 | 19.98072838 | -2.031317332 | 0.415437078 | -4.889590837 | 1.01046E-06 | 0.000338595 | gmnn              | ZDB-GENE-030429-30   | gmnn              |
| ENSDARG00000044774 | 5.807763861 | -3.462846985 | 0.712483094 | -4.860251442 | 1.17237E-06 | 0.000383447 | pou5f3            | ZDB-GENE-980526-485  | pou5f3            |
| ENSDARG00000044323 | 3.286386638 | -3.634476259 | 0.747967428 | -4.859137074 | 1.17898E-06 | 0.000383447 | zgc:193690        | ZDB-GENE-080721-12   | zgc:193690        |
| ENSDARG00000102892 | 14.64996812 | -9.08978942  | 1.885979513 | -4.819664985 | 1.43799E-06 | 0.000460909 | h1m               | ZDB-GENE-030131-5614 | h1m               |
| ENSDARG00000099247 | 5.252380094 | -3.558250638 | 0.739520802 | -4.811562604 | 1.49755E-06 | 0.00047314  | si:dkey-68o6.5    | ZDB-GENE-030131-5416 | si:dkey-68o6.5    |
| ENSDARG00000004529 | 2.766389635 | -4.494466145 | 0.936905357 | -4.797139982 | 1.60947E-06 | 0.000501339 | zgc:173742        | ZDB-GENE-030131-6489 | zgc:173742        |
| ENSDARG00000004823 | 2.032907526 | -5.104340824 | 1.070897298 | -4.766414887 | 1.87533E-06 | 0.000576039 | asz1              | ZDB-GENE-040426-988  | asz1              |
| ENSDARG00000101652 | 16.96255046 | -1.69776914  | 0.356437549 | -4.763160176 | 1.90584E-06 | 0.000577393 | haus6             | ZDB-GENE-030131-5517 | haus6             |
| ENSDARG00000042129 | 10.64015137 | -7.296542044 | 1.536668562 | -4.748286146 | 2.05148E-06 | 0.000613114 | zp3a.1            | ZDB-GENE-040727-1    | zp3a.1            |
| ENSDARG00000014402 | 1.715586943 | -4.796345641 | 1.017450136 | -4.714084231 | 2.428E-06   | 0.000715969 | smc1b             | ZDB-GENE-091217-1    | smc1b             |
| ENSDARG00000051923 | 43.84884501 | -1.76957481  | 0.375969777 | -4.706694313 | 2.51766E-06 | 0.000732639 | ccnb1             | ZDB-GENE-000406-10   | ccnb1             |
| ENSDARG00000014357 | 3.385509596 | -3.217187592 | 0.693782809 | -4.637168215 | 3.53215E-06 | 0.001014507 | amh               | ZDB-GENE-050706-192  | amh               |
| ENSDARG00000028295 | 23.11905057 | -1.597425683 | 0.345128067 | -4.628501226 | 3.68322E-06 | 0.001044334 | mkrn4             | ZDB-GENE-030131-5954 | mkrn4             |
| ENSDARG00000087330 | 33.02536412 | -0.807357016 | 0.175105845 | -4.610679984 | 4.01354E-06 | 0.001123588 | maza              | ZDB-GENE-110603-4    | maza              |
| ENSDARG00000088524 | 4.051002146 | -2.294884641 | 0.500300149 | -4.587015708 | 4.49627E-06 | 0.001242993 | acot17            | ZDB-GENE-040426-2381 | acot17            |
| ENSDARG00000087392 | 15.91016015 | -10.29311115 | 2.247142723 | -4.580532887 | 4.63793E-06 | 0.001252879 | si:ch73-160p18.3  | ZDB-GENE-141212-268  | si:ch73-160p18.3  |
| ENSDARG00000034989 | 10.57493606 | -8.682777673 | 1.895720465 | -4.580199367 | 4.64533E-06 | 0.001252879 | retsatl           | ZDB-GENE-051113-252  | retsatl           |
| ENSDARG00000040266 | 4.658260534 | -3.087782691 | 0.678322169 | -4.552088713 | 5.31159E-06 | 0.001415316 | sox19b            | ZDB-GENE-010111-1    | sox19b            |
| ENSDARG00000055973 | 4.059680521 | -27.0177086  | 5.970813528 | -4.524962716 | 6.04062E-06 | 0.001580106 | zar1l             | ZDB-GENE-060810-119  | zar1l             |
| ENSDARG00000059507 | 23.6779285  | 0.904722088  | 0.199990112 | 4.523834094  | 6.07293E-06 | 0.001580106 | si:dkey-163m14.2  | ZDB-GENE-120215-47   | si:dkey-163m14.2  |
| ENSDARG00000079957 | 1.828023984 | -4.744674421 | 1.062609749 | -4.465114709 | 8.00259E-06 | 0.002035144 | eloal             | ZDB-GENE-131029-2    | eloal             |
| ENSDARG00000003904 | 3.728765986 | -3.247016792 | 0.727210978 | -4.465027196 | 8.00586E-06 | 0.002035144 | sycp1             | ZDB-GENE-040910-6    | sycp1             |
| ENSDARG00000012718 | 2.594447728 | -3.916276756 | 0.879397149 | -4.453365308 | 8.45347E-06 | 0.002094335 | wee2              | ZDB-GENE-030131-5682 | wee2              |
| ENSDARG00000052433 | 0.872496317 | -3.975046154 | 0.892745086 | -4.452610512 | 8.48326E-06 | 0.002094335 | inha              | ZDB-GENE-060503-554  | inha              |
| ENSDARG00000016177 | 71.85271595 | -0.826019631 | 0.185555161 | -4.451612269 | 8.5228E-06  | 0.002094335 | eif4enif1         | ZDB-GENE-050320-113  | eif4enif1         |
| ENSDARG00000071727 | 11.8033103  | -8.382145268 | 1.88587846  | -4.444690071 | 8.80187E-06 | 0.002139144 | si:dkey-37o8.1    | ZDB-GENE-030131-5667 | si:dkey-37o8.1    |
| ENSDARG00000096229 | 3.302355466 | -3.475950738 | 0.782851708 | -4.440113884 | 8.99113E-06 | 0.002161389 | si:dkey-260c8.8   | ZDB-GENE-030131-5375 | si:dkey-260c8.8   |
| ENSDARG00000069744 | 2.35429704  | -5.196684605 | 1.171159581 | -4.437213075 | 9.11311E-06 | 0.002167156 | mos               | ZDB-GENE-040428-3    | mos               |
| ENSDARG00000058574 | 44.42284094 | -0.61334591  | 0.138745163 | -4.420665168 | 9.83975E-06 | 0.002315064 | abcg2c            | ZDB-GENE-050517-37   | abcg2c            |
| ENSDARG00000075737 | 12.90956288 | -8.533824676 | 1.931598825 | -4.418010906 | 9.96134E-06 | 0.002319    | zgc:165518        | ZDB-GENE-070720-15   | zgc:165518        |

|                    |             |              |             |              |             |             |                   |                      |                   |
|--------------------|-------------|--------------|-------------|--------------|-------------|-------------|-------------------|----------------------|-------------------|
| ENSDARG0000069031  | 8.368760124 | 1.592981606  | 0.362450762 | 4.395028991  | 1.10758E-05 | 0.002534469 | plac8l1           | ZDB-GENE-091204-165  | plac8l1           |
| ENSDARG00000011371 | 140.4107802 | -0.759375525 | 0.172832174 | -4.39371622  | 1.11429E-05 | 0.002534469 | zgc:64106         | ZDB-GENE-040426-1370 | zgc:64106         |
| ENSDARG00000012485 | 16.12274783 | -1.756803845 | 0.399999852 | -4.392011233 | 1.12307E-05 | 0.002534469 | aurka             | ZDB-GENE-040801-161  | aurka             |
| ENSDARG00000004405 | 5.894809932 | -2.559231573 | 0.583130141 | -4.388782872 | 1.13987E-05 | 0.002546396 | snx10a            | ZDB-GENE-050809-44   | snx10a            |
| ENSDARG00000041723 | 29.63809375 | -1.455224856 | 0.332149128 | -4.381239435 | 1.18006E-05 | 0.002609823 | zgc:55461         | ZDB-GENE-040426-2879 | zgc:55461         |
| ENSDARG00000094992 | 2.189712385 | -4.797338153 | 1.097239323 | -4.372189413 | 1.23007E-05 | 0.002693482 | otx1              | ZDB-GENE-980526-400  | otx1              |
| ENSDARG00000040732 | 3.7050744   | -7.016178964 | 1.606891692 | -4.366304836 | 1.26366E-05 | 0.002739914 | elavl2            | ZDB-GENE-040704-9    | elavl2            |
| ENSDARG00000097556 | 12.12683591 | -1.290377828 | 0.296346136 | -4.354292732 | 1.33497E-05 | 0.002865041 | cyp8b2            | ZDB-GENE-080212-9    | cyp8b2            |
| ENSDARG00000115205 | 11.98062755 | -8.013307667 | 1.841173893 | -4.352281823 | 1.34728E-05 | 0.002865041 | zgc:171445        | ZDB-GENE-080205-2    | zgc:171445        |
| ENSDARG00000034503 | 232.8437607 | 1.287250142  | 0.296653525 | 4.339237641  | 1.42978E-05 | 0.003011522 | per2              | ZDB-GENE-011220-2    | per2              |
| ENSDARG00000079782 | 95.72279038 | -5.739487144 | 1.329866567 | -4.315836855 | 1.58999E-05 | 0.003317387 | myh7l             | ZDB-GENE-061027-393  | myh7l             |
| ENSDARG00000093044 | 89.53704323 | 1.93415892   | 0.448649222 | 4.311071601  | 1.62465E-05 | 0.003358021 | si:ch211-161h7.5  | ZDB-GENE-091204-265  | si:ch211-161h7.5  |
| ENSDARG00000102366 | 13.1090728  | -1.90618933  | 0.442515971 | -4.307617028 | 1.65023E-05 | 0.003379914 | mical12a          | ZDB-GENE-030131-5409 | mical12a          |
| ENSDARG00000010332 | 5.223919382 | -7.575761503 | 1.76027469  | -4.303738244 | 1.6794E-05  | 0.003407489 | zgc:56231         | ZDB-GENE-040426-1914 | zgc:56231         |
| ENSDARG00000087187 | 5.23822879  | -2.32631321  | 0.543520387 | -4.28008455  | 1.86822E-05 | 0.003756148 | grip2a            | ZDB-GENE-081104-132  | grip2a            |
| ENSDARG00000096603 | 5.599978172 | -2.683041376 | 0.62780428  | -4.273690801 | 1.92264E-05 | 0.003830723 | bmb               | ZDB-GENE-030131-5577 | bmb               |
| ENSDARG00000094392 | 32.88691462 | -9.343919426 | 2.200095996 | -4.247050784 | 2.16603E-05 | 0.004277133 | si:dkey-229d11.5  | ZDB-GENE-030131-5342 | si:dkey-229d11.5  |
| ENSDARG0000016538  | 2.197746638 | -4.238218938 | 1.002248326 | -4.228711418 | 2.35034E-05 | 0.004600003 | zgc:55888         | ZDB-GENE-040426-834  | zgc:55888         |
| ENSDARG00000070542 | 73.1423772  | 0.848525918  | 0.201247415 | 4.216332021  | 2.48308E-05 | 0.004817177 | mafbb             | ZDB-GENE-010605-4    | mafbb             |
| ENSDARG00000074163 | 3.299192559 | -3.173605621 | 0.754108502 | -4.208420422 | 2.57162E-05 | 0.004945562 | zgc:162879        | ZDB-GENE-070424-92   | zgc:162879        |
| ENSDARG00000016908 | 11.99639237 | -9.166095863 | 2.182694208 | -4.199441145 | 2.67575E-05 | 0.005101448 | zgc:171779        | ZDB-GENE-071004-38   | zgc:171779        |
| ENSDARG00000045051 | 26.51522229 | -1.435247637 | 0.34196481  | -4.197062374 | 2.70399E-05 | 0.005111244 | slc16a3           | ZDB-GENE-030131-5487 | slc16a3           |
| ENSDARG00000061778 | 12.28927138 | -1.716901463 | 0.409347145 | -4.194243159 | 2.73784E-05 | 0.005131365 | fmn2b             | ZDB-GENE-080225-35   | fmn2b             |
| ENSDARG00000029822 | 6468.840016 | 1.03935111   | 0.248115781 | 4.18897624   | 2.80216E-05 | 0.005207774 | cel.2             | ZDB-GENE-061110-10   | cel.2             |
| ENSDARG00000091558 | 3.905836102 | -4.33606142  | 1.037778346 | -4.178215357 | 2.93805E-05 | 0.005414833 | si:ch211-251f6.7  | ZDB-GENE-091113-57   | si:ch211-251f6.7  |
| ENSDARG00000009942 | 18.60678543 | -1.444464887 | 0.34813098  | -4.149199497 | 3.3364E-05  | 0.006098166 | cdc6              | ZDB-GENE-050506-131  | cdc6              |
| ENSDARG00000059917 | 4.588057711 | -2.306728181 | 0.558066452 | -4.133429226 | 3.5739E-05  | 0.006478726 | ccnj              | ZDB-GENE-100721-4    | ccnj              |
| ENSDARG00000054374 | 3.75746687  | -6.930146227 | 1.685231545 | -4.112281336 | 3.91768E-05 | 0.007044188 | alg13             | ZDB-GENE-060307-1    | alg13             |
| ENSDARG00000037491 | 1.159150839 | -5.251453599 | 1.280134866 | -4.102265891 | 4.09124E-05 | 0.00729692  | bmp15             | ZDB-GENE-030131-6115 | bmp15             |
| ENSDARG00000042213 | 6.538810301 | -2.152096756 | 0.526101316 | -4.090650772 | 4.30164E-05 | 0.007610814 | si:ch211-233h19.2 | ZDB-GENE-061009-14   | si:ch211-233h19.2 |
| ENSDARG00000002330 | 1.292463966 | -5.455073806 | 1.334533546 | -4.087625839 | 4.3581E-05  | 0.007649508 | lhx8a             | ZDB-GENE-031008-2    | lhx8a             |
| ENSDARG00000104643 | 2.037701381 | -3.349456093 | 0.820410712 | -4.082657679 | 4.45236E-05 | 0.007709545 | tuba7l            | ZDB-GENE-040704-78   | tuba7l            |
| ENSDARG00000061221 | 2.250625296 | -3.804595663 | 0.932006954 | -4.082153728 | 4.46203E-05 | 0.007709545 | si:ch211-157j23.2 | ZDB-GENE-030131-5686 | si:ch211-157j23.2 |
| ENSDARG00000079589 | 131.5848738 | -4.700986621 | 1.15553917  | -4.068167268 | 4.73844E-05 | 0.008123663 | si:dkeyp-73d8.6   | ZDB-GENE-070912-683  | si:dkeyp-73d8.6   |
| ENSDARG00000044811 | 93.10199102 | 0.460560004  | 0.114038411 | 4.038639268  | 5.37622E-05 | 0.009146186 | cdk9              | ZDB-GENE-030131-321  | cdk9              |
| ENSDARG00000071009 | 21.36726493 | -1.109527801 | 0.276216519 | -4.016877067 | 5.89745E-05 | 0.009956331 | kif20ba           | ZDB-GENE-041111-213  | kif20ba           |
| ENSDARG00000086112 | 47.94473976 | -1.025475607 | 0.255435073 | -4.014623344 | 5.95408E-05 | 0.009971707 | si:ch211-266i6.3  | ZDB-GENE-030131-5420 | si:ch211-266i6.3  |
| ENSDARG00000020289 | 4.914608185 | -2.729524799 | 0.680180914 | -4.012939413 | 5.99673E-05 | 0.009971707 | pif1              | ZDB-GENE-030131-4928 | pif1              |
| ENSDARG00000113246 | 1.573710341 | -5.030388325 | 1.259939158 | -3.992564477 | 6.53626E-05 | 0.010787748 | CABZ01051901.1    |                      |                   |
| ENSDARG00000102636 | 2.630149099 | -2.729697818 | 0.686124732 | -3.978427959 | 6.93724E-05 | 0.011315883 | trmt9b            | ZDB-GENE-030131-4851 | trmt9b            |
| ENSDARG00000006604 | 21.95873732 | -1.27930847  | 0.321620353 | -3.97769749  | 6.95858E-05 | 0.011315883 | nectin3b          | ZDB-GENE-050327-14   | nectin3b          |
| ENSDARG00000045423 | 22.06476979 | -10.86741883 | 2.733959049 | -3.974974985 | 7.03867E-05 | 0.011362564 | si:ch211-146i10.8 | ZDB-GENE-160113-6    | si:ch211-146i10.8 |
| ENSDARG00000018542 | 4.385820049 | -1.983928422 | 0.499895751 | -3.968684303 | 7.22706E-05 | 0.011582141 | hapln4            | ZDB-GENE-060503-243  | hapln4            |
| ENSDARG00000040081 | 2.146549227 | -4.060099363 | 1.024780617 | -3.961920526 | 7.43493E-05 | 0.01182956  | zp3d.1            | ZDB-GENE-030131-5827 | zp3d.1            |
| ENSDARG00000025386 | 5.158199785 | -6.495190642 | 1.643737169 | -3.951477625 | 7.76701E-05 | 0.012193154 | lsm14b            | ZDB-GENE-040426-779  | lsm14b            |
| ENSDARG00000069192 | 7.380566364 | -2.094821332 | 0.530173826 | -3.951197193 | 7.77612E-05 | 0.012193154 | zgc:163030        | ZDB-GENE-060810-77   | zgc:163030        |
| ENSDARG00000097414 | 40.24083625 | -1.232484551 | 0.31206158  | -3.949491481 | 7.83174E-05 | 0.012193154 | si:ch211-106e7.2  | ZDB-GENE-031116-72   | si:ch211-106e7.2  |
| ENSDARG00000070178 | 1.427928611 | -4.502960608 | 1.140596489 | -3.947899762 | 7.88398E-05 | 0.012193154 | zp3d.2            | ZDB-GENE-030131-5363 | zp3d.2            |
| ENSDARG00000100185 | 5.440194487 | -2.916473894 | 0.740824529 | -3.936794451 | 8.25773E-05 | 0.012682494 | elovl7b           | ZDB-GENE-030131-5485 | elovl7b           |

|                    |             |              |             |              |             |             |                  |                      |                  |
|--------------------|-------------|--------------|-------------|--------------|-------------|-------------|------------------|----------------------|------------------|
| ENSDARG00000105479 | 23.4411577  | -1.0785006   | 0.274113736 | -3.934500387 | 8.33699E-05 | 0.012715927 | si:ch211-126c2.4 | ZDB-GENE-030131-3087 | si:ch211-126c2.4 |
| ENSDARG00000069790 | 13.36774316 | -1.448850057 | 0.369082414 | -3.925546174 | 8.65332E-05 | 0.013107997 | dynll2a          | ZDB-GENE-030828-11   | dynll2a          |
| ENSDARG00000069065 | 26.48999436 | -0.918442733 | 0.23424939  | -3.920790278 | 8.82591E-05 | 0.013278484 | btg3             | ZDB-GENE-031113-19   | btg3             |
| ENSDARG00000025174 | 2.63365499  | -5.335503004 | 1.374776866 | -3.880995625 | 0.00010403  | 0.015545413 | zgc:103482       | ZDB-GENE-041010-115  | zgc:103482       |
| ENSDARG00000053575 | 1.268407183 | -4.363026846 | 1.126658841 | -3.872535935 | 0.000107709 | 0.015987165 | gpat2            | ZDB-GENE-050309-118  | gpat2            |
| ENSDARG00000019763 | 48.95424928 | -1.694993297 | 0.441454102 | -3.839568577 | 0.000123251 | 0.018084261 | acp5a            | ZDB-GENE-040426-2864 | acp5a            |
| ENSDARG00000044485 | 3.821111697 | -2.967392245 | 0.772934198 | -3.839126609 | 0.000123473 | 0.018084261 | sall4            | ZDB-GENE-060328-2    | sall4            |
| ENSDARG00000058471 | 46.34395225 | -1.114206818 | 0.292219994 | -3.812904118 | 0.000137343 | 0.01992823  | plk1             | ZDB-GENE-021115-7    | plk1             |
| ENSDARG00000044514 | 7.0564573   | -1.982500627 | 0.520072768 | -3.811967765 | 0.000137865 | 0.01992823  | st6gal1          | ZDB-GENE-060322-3    | st6gal1          |
| ENSDARG00000075008 | 7.290309911 | -1.57848657  | 0.414821155 | -3.805221961 | 0.000141677 | 0.020346301 | pask             | ZDB-GENE-030131-1394 | pask             |
| ENSDARG00000052375 | 1.851318015 | -2.961328171 | 0.779228212 | -3.800334902 | 0.000144501 | 0.020617914 | zgc:66455        | ZDB-GENE-040426-1642 | zgc:66455        |
| ENSDARG00000104034 | 21.56236765 | -1.278950421 | 0.337407859 | -3.790517577 | 0.000150334 | 0.021312692 | arid3b           | ZDB-GENE-070209-182  | arid3b           |
| ENSDARG00000038812 | 2.819066884 | -2.639049397 | 0.696975692 | -3.786429608 | 0.000152827 | 0.021528216 | e2f5             | ZDB-GENE-030828-3    | e2f5             |
| ENSDARG00000086529 | 3.637523651 | -5.81323574  | 1.535955085 | -3.784769358 | 0.000153851 | 0.021535272 | si:dkey-90l23.2  | ZDB-GENE-041008-200  | si:dkey-90l23.2  |
| ENSDARG00000089567 | 6.27235762  | -7.154130854 | 1.893980245 | -3.777299617 | 0.000158538 | 0.022051734 | patl2            | ZDB-GENE-121214-350  | patl2            |
| ENSDARG00000079241 | 9.123095778 | -1.198354596 | 0.317471236 | -3.774687148 | 0.000160209 | 0.022144833 | wdr90            | ZDB-GENE-070424-67   | wdr90            |
| ENSDARG00000079467 | 9.566629182 | -1.494786269 | 0.396851199 | -3.766616484 | 0.000165475 | 0.022730701 | si:ch73-15b2.5   | ZDB-GENE-030131-5406 | si:ch73-15b2.5   |
| ENSDARG00000077620 | 60.7239628  | -0.93851526  | 0.249824253 | -3.756701881 | 0.000172167 | 0.023504037 | cdca7a           | ZDB-GENE-050417-29   | cdca7a           |
| ENSDARG00000011094 | 34.9555632  | -1.173229756 | 0.313802472 | -3.738752433 | 0.000184936 | 0.025092262 | ccna2            | ZDB-GENE-020418-1    | ccna2            |
| ENSDARG00000095463 | 5.497370877 | -6.872445749 | 1.841607905 | -3.73176382  | 0.000190144 | 0.025641578 | si:ch73-90k17.1  | ZDB-GENE-090312-218  | si:ch73-90k17.1  |
| ENSDARG00000006003 | 22.95466035 | -1.085637595 | 0.291559057 | -3.723559844 | 0.000196433 | 0.026329201 | mycla            | ZDB-GENE-040426-2439 | mycla            |
| ENSDARG00000098414 | 19.10683734 | -1.061017669 | 0.285420078 | -3.71738974  | 0.000201292 | 0.026817887 | ninl             | ZDB-GENE-130530-768  | ninl             |
| ENSDARG00000005454 | 60.60589329 | -0.896307565 | 0.241273162 | -3.714907855 | 0.000203278 | 0.026920304 | tacc3            | ZDB-GENE-050522-327  | tacc3            |
| ENSDARG00000077089 | 15.4036217  | -1.054478078 | 0.284044847 | -3.712364749 | 0.000205332 | 0.027030464 | blm              | ZDB-GENE-070702-5    | blm              |
| ENSDARG00000100741 | 31.8817518  | -1.271544018 | 0.343109136 | -3.705946261 | 0.000210603 | 0.027560325 | cdc20            | ZDB-GENE-040426-2044 | cdc20            |
| ENSDARG00000011262 | 5.579288125 | -1.482548649 | 0.402164116 | -3.686426983 | 0.000227425 | 0.02953744  | traip            | ZDB-GENE-040801-30   | traip            |
| ENSDARG00000024904 | 11.46726433 | -1.618434773 | 0.439152779 | -3.685357015 | 0.000228382 | 0.02953744  | stil             | ZDB-GENE-020419-39   | stil             |
| ENSDARG00000068465 | 3.085370513 | -4.90794222  | 1.334663166 | -3.677289031 | 0.000235726 | 0.030309964 | zgc:136254       | ZDB-GENE-060421-3062 | zgc:136254       |
| ENSDARG00000014565 | 1.722905832 | -3.750492788 | 1.021902303 | -3.67010895  | 0.000242447 | 0.03099399  | eif4e1b          | ZDB-GENE-980526-127  | eif4e1b          |
| ENSDARG00000098739 | 6.27345322  | -5.758714929 | 1.571419873 | -3.664657059 | 0.00024767  | 0.031479739 | h2af1al          |                      |                  |
| ENSDARG00000004460 | 15.61122614 | -1.004588569 | 0.274607502 | -3.658270668 | 0.000253923 | 0.032061154 | desi2            | ZDB-GENE-040801-39   | desi2            |
| ENSDARG00000016570 | 144.2095526 | 0.556129328  | 0.152070863 | 3.657040653  | 0.000255144 | 0.032061154 | prlra            | ZDB-GENE-080103-2    | prlra            |
| ENSDARG00000077638 | 2.359358942 | -2.527722573 | 0.692708176 | -3.649043941 | 0.000263218 | 0.032888876 | zgc:171965       | ZDB-GENE-070820-20   | zgc:171965       |
| ENSDARG00000105034 | 6.62278708  | -1.631207894 | 0.447705927 | -3.643480681 | 0.000268976 | 0.033419494 | zdhhc18b         | ZDB-GENE-030131-6315 | zdhhc18b         |
| ENSDARG00000074656 | 38.1249723  | -1.46763207  | 0.403165035 | -3.640276175 | 0.000272346 | 0.033649156 | ctss2.1          | ZDB-GENE-050522-559  | ctss2.1          |
| ENSDARG00000053558 | 6.451465959 | -2.091244924 | 0.575002513 | -3.636931797 | 0.000275905 | 0.033899521 | rtkn2a           | ZDB-GENE-041010-225  | rtkn2a           |
| ENSDARG00000035990 | 397.5780914 | 0.539604975  | 0.148514373 | 3.633351879  | 0.000279763 | 0.034183648 | cited4a          | ZDB-GENE-030131-7661 | cited4a          |
| ENSDARG00000030756 | 130.7230981 | -0.903378523 | 0.24882882  | -3.630522073 | 0.000282849 | 0.034338826 | dnmt1            | ZDB-GENE-990714-15   | dnmt1            |
| ENSDARG00000039117 | 467.0147218 | 0.370535747  | 0.102094312 | 3.629347605  | 0.000284138 | 0.034338826 | tefa             | ZDB-GENE-990415-264  | tefa             |
| ENSDARG00000087393 | 5.346282055 | -1.913902597 | 0.528195139 | -3.623476355 | 0.00029067  | 0.034937245 | prr11            | ZDB-GENE-091118-97   | prr11            |
| ENSDARG00000029432 | 1.679065962 | -3.440053995 | 0.950072564 | -3.620832897 | 0.000293656 | 0.035105401 | tph1a            | ZDB-GENE-030317-1    | tph1a            |
| ENSDARG00000019195 | 41.50796361 | -0.833258234 | 0.230529344 | -3.614543034 | 0.000300878 | 0.035775346 | vps9d1           | ZDB-GENE-050306-57   | vps9d1           |
| ENSDARG00000004713 | 15.27287285 | -1.169241517 | 0.32513204  | -3.596205148 | 0.000322893 | 0.038187732 | mad2l1           | ZDB-GENE-030515-3    | mad2l1           |
| ENSDARG00000115428 | 2.628613401 | -4.073030212 | 1.13491246  | -3.588849673 | 0.00033214  | 0.039032854 | CABZ01101813.1   |                      |                  |
| ENSDARG00000058725 | 9.354173695 | 2.990903943  | 0.833647898 | 3.587730444  | 0.000333569 | 0.039032854 | rfesd            | ZDB-GENE-050417-254  | rfesd            |
| ENSDARG00000023900 | 34.17251741 | -0.803397275 | 0.224123007 | -3.58462653  | 0.000337561 | 0.039292087 | casd1            | ZDB-GENE-060503-329  | casd1            |
| ENSDARG00000042688 | 4.429223209 | -2.236065849 | 0.624363167 | -3.581354519 | 0.000341817 | 0.03957924  | bora             | ZDB-GENE-041114-165  | bora             |
| ENSDARG00000005355 | 37.76374141 | -0.987397779 | 0.27645003  | -3.571704361 | 0.000354666 | 0.040853049 | larp6a           | ZDB-GENE-030131-6403 | larp6a           |
| ENSDARG00000116005 | 12.85333341 | -10.00837462 | 2.808782414 | -3.563243124 | 0.000366301 | 0.041974693 | zgc:171446       | ZDB-GENE-080205-1    | zgc:171446       |

|                    |             |              |             |              |             |             |                   |                      |                   |
|--------------------|-------------|--------------|-------------|--------------|-------------|-------------|-------------------|----------------------|-------------------|
| ENSDARG00000055622 | 2.881173194 | -2.591827679 | 0.732741639 | -3.537164454 | 0.000404448 | 0.046107043 | zgc:153345        | ZDB-GENE-061103-487  | zgc:153345        |
| ENSDARG00000008278 | 9.488545653 | -1.249851565 | 0.353535889 | -3.535289077 | 0.000407329 | 0.046197408 | rcor2             | ZDB-GENE-040426-1812 | rcor2             |
| ENSDARG00000078567 | 194.5547317 | 0.665086374  | 0.188634702 | 3.525790147  | 0.000422221 | 0.047642083 | lonrf1l           | ZDB-GENE-081104-397  | lonrf1l           |
| ENSDARG00000018566 | 182.6244641 | -0.974964281 | 0.276803537 | -3.522224798 | 0.000427941 | 0.047934279 | flnca             | ZDB-GENE-070503-1    | flnca             |
| ENSDARG00000004702 | 71.45637761 | 0.563904088  | 0.160132716 | 3.521479567  | 0.000429146 | 0.047934279 | irf2bp2a          | ZDB-GENE-030131-7809 | irf2bp2a          |
| ENSDARG00000068387 | 240.2880273 | 0.842835776  | 0.239830296 | 3.514300695  | 0.000440913 | 0.04900121  | slc6a18           | ZDB-GENE-080219-9    | slc6a18           |
| ENSDARG00000089802 | 1.63980811  | -6.025273727 | 1.71618063  | -3.510862214 | 0.000446656 | 0.049391203 | akap1a            | ZDB-GENE-030131-5980 | akap1a            |
| ENSDARG00000017917 | 1.515517599 | -4.186946261 | 1.195173284 | -3.503212728 | 0.000459682 | 0.050578763 | her7              | ZDB-GENE-000427-6    | her7              |
| ENSDARG00000070434 | 21.36927845 | -0.766691081 | 0.219459497 | -3.493542499 | 0.000476657 | 0.052050226 | rhov              | ZDB-GENE-031002-10   | rhov              |
| ENSDARG00000043236 | 8.820878287 | -8.04330291  | 2.302742055 | -3.492923966 | 0.000477763 | 0.052050226 | ccna1             | ZDB-GENE-040311-2    | ccna1             |
| ENSDARG00000042232 | 30.4950228  | -0.552153731 | 0.158634556 | -3.480664896 | 0.000500171 | 0.054224403 | specc1lb          | ZDB-GENE-090423-1    | specc1lb          |
| ENSDARG00000114552 | 6.486766574 | -1.852177303 | 0.533831145 | -3.469593935 | 0.000521246 | 0.056233518 | siva1             | ZDB-GENE-050506-57   | siva1             |
| ENSDARG00000037403 | 11.3164799  | -1.064467613 | 0.306919972 | -3.468225303 | 0.000523908 | 0.056246339 | si:dkey-4p15.3    | ZDB-GENE-121214-31   | si:dkey-4p15.3    |
| ENSDARG00000105626 | 1.144275373 | -4.768537611 | 1.376201469 | -3.464999651 | 0.000530232 | 0.056650312 | adad2             | ZDB-GENE-130530-788  | adad2             |
| ENSDARG00000079578 | 30.64046228 | -1.094942341 | 0.317719193 | -3.446258097 | 0.000568407 | 0.060436989 | rbpms2b           | ZDB-GENE-040426-741  | rbpms2b           |
| ENSDARG00000028976 | 12.59791764 | -1.08818135  | 0.316146462 | -3.442016542 | 0.000577395 | 0.061098883 | pus3              | ZDB-GENE-030131-9433 | pus3              |
| ENSDARG00000042063 | 3.018582718 | -3.913041356 | 1.141827451 | -3.426998846 | 0.000610292 | 0.064272431 | si:ch211-145c1.1  | ZDB-GENE-070912-81   | si:ch211-145c1.1  |
| ENSDARG00000093216 | 25.73287077 | -10.27878527 | 3.003519378 | -3.42224703  | 0.000621059 | 0.06509636  | si:ch211-146l10.7 | ZDB-GENE-091112-4    | si:ch211-146l10.7 |
| ENSDARG00000060109 | 30.04494609 | 0.618435848  | 0.180813281 | 3.420301006  | 0.000625519 | 0.065254594 | aggf1             | ZDB-GENE-060929-836  | aggf1             |
| ENSDARG00000068840 | 1.965008413 | -6.248844833 | 1.828157419 | -3.418110918 | 0.000630574 | 0.065473124 | zgc:66024         | ZDB-GENE-040426-1511 | zgc:66024         |
| ENSDARG00000056151 | 136.8035178 | 0.552030665  | 0.161690997 | 3.414108861  | 0.00063991  | 0.066132009 | tyrp1b            | ZDB-GENE-040718-249  | tyrp1b            |
| ENSDARG00000075048 | 205.5960192 | 0.674654619  | 0.197880963 | 3.409396287  | 0.000651068 | 0.066972215 | lonrf1            | ZDB-GENE-101021-4    | lonrf1            |
| ENSDARG00000042527 | 8.315462084 | -1.077459434 | 0.316328296 | -3.406143071 | 0.000658876 | 0.067285905 | unga              | ZDB-GENE-040426-900  | unga              |
| ENSDARG00000044437 | 9.819678842 | -1.203812132 | 0.353480804 | -3.405594073 | 0.000660203 | 0.067285905 | cdca5             | ZDB-GENE-030131-235  | cdca5             |
| ENSDARG00000087094 | 2.75298835  | -2.45222485  | 0.720862579 | -3.401792411 | 0.000669455 | 0.06791587  | foxa              | ZDB-GENE-990415-76   | foxa              |
| ENSDARG00000055575 | 118.6300142 | 0.355987957  | 0.104898832 | 3.393631262  | 0.000689725 | 0.069652772 | pcolce2b          | ZDB-GENE-040426-1177 | pcolce2b          |
| ENSDARG00000077288 | 11.99470152 | -1.490382997 | 0.440254249 | -3.385277937 | 0.000711062 | 0.07148114  | si:ch211-188c16.1 | ZDB-GENE-070912-162  | si:ch211-188c16.1 |
| ENSDARG00000089967 | 15.58612377 | -1.033364593 | 0.305434106 | -3.383265241 | 0.000716294 | 0.071681275 | si:ch211-59o9.10  | ZDB-GENE-101206-1    | si:ch211-59o9.10  |
| ENSDARG00000069926 | 1.996948122 | -1.823474853 | 0.53983489  | -3.377838092 | 0.000730581 | 0.072781646 | hsd3b1            | ZDB-GENE-081105-30   | hsd3b1            |
| ENSDARG00000099801 | 2.66403747  | -2.827844523 | 0.838267225 | -3.373440403 | 0.000742351 | 0.073622592 | topaz1            | ZDB-GENE-130117-1    | topaz1            |
| ENSDARG00000061794 | 206.4710441 | 0.362032258  | 0.107442577 | 3.369541831  | 0.000752933 | 0.074338651 | jam3b             | ZDB-GENE-030131-441  | jam3b             |
| ENSDARG00000006640 | 7.149025592 | -1.566726324 | 0.465380282 | -3.366550722 | 0.000761146 | 0.074815561 | eomesa            | ZDB-GENE-001228-1    | eomesa            |
| ENSDARG00000039020 | 10.120603   | -1.488116491 | 0.442413243 | -3.363634601 | 0.000769233 | 0.075275931 | fbxo5             | ZDB-GENE-030131-4027 | fbxo5             |
| ENSDARG00000002347 | 3.01121969  | -5.054117605 | 1.50505941  | -3.358085117 | 0.000784844 | 0.076465282 | cyp11a1           | ZDB-GENE-010306-1    | cyp11a1           |
| ENSDARG00000037739 | 29.55971053 | -0.888960698 | 0.264853221 | -3.356427739 | 0.000789564 | 0.07658766  | zgc:112980        | ZDB-GENE-050306-1    | zgc:112980        |
| ENSDARG00000023002 | 7.775266181 | -1.357683129 | 0.404958128 | -3.352650644 | 0.000800417 | 0.077075947 | dtl               | ZDB-GENE-020419-34   | dtl               |
| ENSDARG00000089399 | 254.4265041 | 0.799811971  | 0.238589387 | 3.352252921  | 0.000801568 | 0.077075947 | tmem176l.2        | ZDB-GENE-080829-12   | tmem176l.2        |
| ENSDARG00000076473 | 20.07099878 | -0.795726241 | 0.237598304 | -3.349040069 | 0.000810921 | 0.077637756 | trim37            | ZDB-GENE-030131-2957 | trim37            |
| ENSDARG00000104114 | 16.25111754 | -1.187803355 | 0.354822977 | -3.347594239 | 0.000815163 | 0.07770749  | kmt5ab            | ZDB-GENE-071004-17   | kmt5ab            |
| ENSDARG00000092919 | 1.14857605  | -5.10145724  | 1.52540204  | -3.344336185 | 0.000824797 | 0.078115478 | zp3c              | ZDB-GENE-060817-5    | zp3c              |
| ENSDARG00000102145 | 7.204450791 | -1.090993642 | 0.326277321 | -3.343761802 | 0.000826507 | 0.078115478 | ccdc77            | ZDB-GENE-050913-54   | ccdc77            |
| ENSDARG00000089861 | 36.57622327 | -0.542233711 | 0.162294481 | -3.341048364 | 0.000834627 | 0.078422779 | usp44             | ZDB-GENE-040426-774  | usp44             |
| ENSDARG00000016117 | 25.19040757 | -0.879674854 | 0.263351284 | -3.340309718 | 0.00083685  | 0.078422779 | exd2              | ZDB-GENE-030131-6387 | exd2              |
| ENSDARG00000075113 | 8.560896995 | -8.688317678 | 2.605710937 | -3.334336727 | 0.000855031 | 0.079788445 | nanog             | ZDB-GENE-030131-5486 | nanog             |
| ENSDARG00000068181 | 202.3066343 | 0.531124855  | 0.159743078 | 3.324869288  | 0.0008846   | 0.082200895 | dpep1             | ZDB-GENE-061013-388  | dpep1             |
| ENSDARG00000045768 | 218.1186905 | 0.477587298  | 0.143824837 | 3.320617698  | 0.000898185 | 0.082568987 | cry1a             | ZDB-GENE-010426-2    | cry1a             |
| ENSDARG00000040725 | 14.29354158 | -1.116460534 | 0.336251927 | -3.320309699 | 0.000899176 | 0.082568987 | zgc:114130        | ZDB-GENE-050913-48   | zgc:114130        |
| ENSDARG00000091869 | 15.98656156 | -0.805178893 | 0.242514406 | -3.320128096 | 0.000899762 | 0.082568987 | zgc:171727        | ZDB-GENE-030131-6002 | zgc:162958        |
| ENSDARG00000091869 | 15.98656156 | -0.805178893 | 0.242514406 | -3.320128096 | 0.000899762 | 0.082568987 | zgc:171727        | ZDB-GENE-071004-26   | zgc:171727        |

|                    |             |              |             |              |             |             |                    |                      |                    |
|--------------------|-------------|--------------|-------------|--------------|-------------|-------------|--------------------|----------------------|--------------------|
| ENSDARG00000045815 | 12.97649522 | -1.235829448 | 0.374505192 | -3.299899369 | 0.000967195 | 0.088390435 | mcm10              | ZDB-GENE-041210-42   | mcm10              |
| ENSDARG00000039217 | 25.64829766 | -0.816086035 | 0.247616043 | -3.295772061 | 0.000981516 | 0.089330088 | orc1               | ZDB-GENE-030131-6960 | orc1               |
| ENSDARG00000073961 | 3.342613513 | -2.013808131 | 0.612365168 | -3.288573934 | 0.001006963 | 0.091237468 | si:ch211-160j14.2  | ZDB-GENE-091118-113  | si:ch211-160j14.2  |
| ENSDARG00000100199 | 20.7412474  | 1.507240574  | 0.458472819 | 3.287524388  | 0.001010724 | 0.091237468 | si:ch1073-185p12.2 | ZDB-GENE-110411-196  | si:ch1073-185p12.2 |
| ENSDARG00000005462 | 50.31704727 | -0.89386913  | 0.272352829 | -3.282026232 | 0.00103064  | 0.092657065 | kif4               | ZDB-GENE-040426-1545 | kif4               |
| ENSDARG00000100236 | 5.357761148 | -1.229312496 | 0.375495899 | -3.273837338 | 0.001060977 | 0.094998218 | cspp1a             | ZDB-GENE-120709-73   | cspp1a             |
| ENSDARG00000005095 | 2.843912382 | -2.324870244 | 0.710513556 | -3.272098364 | 0.001067524 | 0.095199061 | glcea              | ZDB-GENE-040630-9    | glcea              |
| ENSDARG00000094857 | 79.91667923 | 0.931190422  | 0.284720188 | 3.27054582   | 0.001073402 | 0.095338747 | dio2               | ZDB-GENE-030327-4    | dio2               |
| ENSDARG00000090814 | 48.20103479 | 0.821408157  | 0.251330698 | 3.268236491  | 0.001082199 | 0.095735651 | si:dkey-18a10.3    | ZDB-GENE-091204-174  | si:dkey-18a10.3    |
| ENSDARG00000002589 | 60.12782273 | 2.325219135  | 0.714863796 | 3.252674351  | 0.001143244 | 0.099687401 | mylpfb             | ZDB-GENE-040912-115  | mylpfb             |
| ENSDARG00000057830 | 6.377902412 | -1.591759091 | 0.489638493 | -3.250886348 | 0.001150458 | 0.099687401 | dnmt3bb.2          | ZDB-GENE-990712-11   | dnmt3bb.2          |
| ENSDARG00000075022 | 1.001643624 | -4.838210081 | 1.48828181  | -3.250869592 | 0.001150526 | 0.099687401 | si:ch211-93e11.8   | ZDB-GENE-121214-283  | si:ch211-93e11.8   |
| ENSDARG00000027495 | 1.052962738 | -3.400792279 | 1.046368955 | -3.250089047 | 0.001153689 | 0.099687401 | elovl4b            | ZDB-GENE-030131-7672 | elovl4b            |
| ENSDARG00000001910 | 266.1563054 | 0.367705985  | 0.113147876 | 3.249782467  | 0.001154933 | 0.099687401 | rorab              | ZDB-GENE-040426-855  | rorab              |
| ENSDARG00000099612 | 1.186596521 | -4.106299139 | 1.263711304 | -3.249396539 | 0.001156501 | 0.099687401 | zgc:66483          | ZDB-GENE-030131-5765 | zgc:66483          |
| ENSDARG00000007671 | 217.6649865 | 0.469426326  | 0.144518858 | 3.248201191  | 0.001161371 | 0.099687401 | ghrb               | ZDB-GENE-071119-4    | ghrb               |
| ENSDARG00000089181 | 1.199671608 | -3.677576963 | 1.132321787 | -3.24781966  | 0.00116293  | 0.099687401 | adad1              | ZDB-GENE-030131-6285 | adad1              |
