# Supplementary material
Source: publisher figshare collection journal article supplement (https://gsajournals.figshare.com/articles/dataset/_/13236983)
Supplement: Supplementary file 5 [file 1]

| Supplemental Table S5: 21dpf trunk RNA-seq data, genes differentially expressed between <i>nr5a1a;nr5a1b</i> double mutants and wildtypes. |             |                |             |              |             |             |                   |                      |                   |
|--------------------------------------------------------------------------------------------------------------------------------------------|-------------|----------------|-------------|--------------|-------------|-------------|-------------------|----------------------|-------------------|
| EnsemblID                                                                                                                                  | baseMean    | log2FoldChange | lfcSE       | stat         | pvalue      | padj        | EnsemblGeneName   | ZFIN_ID              | ZFIN_Name         |
| ENSDARG00000100826                                                                                                                         | 254.3471364 | -2.239650841   | 0.168852602 | -13.26394037 | 3.74679E-40 | 6.71913E-36 | hif1a1            | ZDB-GENE-040426-1315 | hif1a1            |
| ENSDARG00000097205                                                                                                                         | 244.3177908 | -2.366493675   | 0.188093185 | -12.58149608 | 2.66926E-36 | 2.39339E-32 | ulk2              | ZDB-GENE-090218-30   | ulk2              |
| ENSDARG00000000796                                                                                                                         | 190.208268  | -2.519238202   | 0.208733808 | -12.06914313 | 1.53727E-33 | 9.18927E-30 | nr4a1             | ZDB-GENE-040704-11   | nr4a1             |
| ENSDARG00000116005                                                                                                                         | 12.8533334  | 33.65513304    | 2.813505741 | 11.96199195  | 5.61974E-33 | 2.51947E-29 | zgc:171446        | ZDB-GENE-080205-1    | zgc:171446        |
| ENSDARG00000086856                                                                                                                         | 56.76127004 | -2.360755013   | 0.199851624 | -11.81253856 | 3.36253E-32 | 1.20601E-28 | stk35             | ZDB-GENE-061103-553  | stk35             |
| ENSDARG00000029075                                                                                                                         | 97.61254822 | -2.023405679   | 0.172889829 | -11.70343966 | 1.2239E-31  | 3.65803E-28 | pfkfb4b           | ZDB-GENE-031031-4    | pfkfb4b           |
| ENSDARG00000001975                                                                                                                         | 289.4978447 | -1.687474058   | 0.153983271 | -10.95881423 | 6.0284E-28  | 1.54439E-24 | hsd11b2           | ZDB-GENE-030131-6030 | hsd11b2           |
| ENSDARG00000068194                                                                                                                         | 97.25695768 | -3.79302068    | 0.352539    | -10.759152   | 5.36617E-27 | 1.20289E-23 | klf9              | ZDB-GENE-060526-244  | klf9              |
| ENSDARG00000058556                                                                                                                         | 271.5131585 | -3.981916438   | 0.375282726 | -10.61044424 | 2.66479E-26 | 5.30974E-23 | muc5.2            | ZDB-GENE-121108-1    | muc5.2            |
| ENSDARG00000091209                                                                                                                         | 71.94187003 | -3.504225375   | 0.331361441 | -10.5752358  | 3.882E-26   | 6.96159E-23 | ucp3              | ZDB-GENE-040426-1317 | ucp3              |
| ENSDARG00000019613                                                                                                                         | 383.418124  | -1.165068579   | 0.111655381 | -10.43450452 | 1.72511E-25 | 2.81241E-22 | ip6k2b            | ZDB-GENE-040718-85   | ip6k2b            |
| ENSDARG00000017665                                                                                                                         | 121.8976364 | -1.967419733   | 0.189961313 | -10.35694951 | 3.89176E-25 | 5.81591E-22 | snrkb             | ZDB-GENE-040426-1724 | snrkb             |
| ENSDARG00000070426                                                                                                                         | 961.9570551 | -1.964983467   | 0.197587217 | -9.944891667 | 2.65463E-23 | 3.66196E-20 | chac1             | ZDB-GENE-030131-1957 | chac1             |
| ENSDARG00000087303                                                                                                                         | 376.4473634 | -1.91084272    | 0.19401956  | -9.848711764 | 6.94281E-23 | 8.89325E-20 | cebpd             | ZDB-GENE-020111-4    | cebpd             |
| ENSDARG00000102048                                                                                                                         | 50.30115692 | -1.667024052   | 0.169816395 | -9.816626053 | 9.5486E-23  | 1.14157E-19 | slc25a43          | ZDB-GENE-030616-69   | slc25a43          |
| ENSDARG00000037012                                                                                                                         | 111.9606082 | -1.533748821   | 0.160241799 | -9.571465312 | 1.05401E-21 | 1.18135E-18 | slc3a2b           | ZDB-GENE-040122-2    | slc3a2b           |
| ENSDARG00000087188                                                                                                                         | 458.710279  | -2.242458422   | 0.240360239 | -9.329573113 | 1.06298E-20 | 1.12132E-17 | nfil3-6           | ZDB-GENE-040704-63   | nfil3-6           |
| ENSDARG00000059646                                                                                                                         | 107.7855135 | -1.347907704   | 0.146051729 | -9.228974619 | 2.73235E-20 | 2.72218E-17 | nt5dc2            | ZDB-GENE-060810-17   | nt5dc2            |
| ENSDARG00000042667                                                                                                                         | 576.2979129 | -2.472594345   | 0.268560918 | -9.206828616 | 3.35902E-20 | 3.17039E-17 | klf2a             | ZDB-GENE-011109-1    | klf2a             |
| ENSDARG00000020239                                                                                                                         | 299.4418007 | -2.343857631   | 0.257920841 | -9.08750771  | 1.01335E-19 | 9.08622E-17 | lpin1             | ZDB-GENE-080722-2    | lpin1             |
| ENSDARG00000100352                                                                                                                         | 115.3934128 | -2.449399168   | 0.270935313 | -9.040531261 | 1.55912E-19 | 1.33142E-16 | aglb              | ZDB-GENE-050309-54   | aglb              |
| ENSDARG00000035859                                                                                                                         | 214.2492411 | -1.565419018   | 0.173253292 | -9.035435893 | 1.6335E-19  | 1.33153E-16 | angptl4           | ZDB-GENE-041111-222  | angptl4           |
| ENSDARG00000068708                                                                                                                         | 207.9882285 | -1.171568227   | 0.129820981 | -9.024490626 | 1.80533E-19 | 1.36575E-16 | ifrd1             | ZDB-GENE-030131-6132 | ifrd1             |
| ENSDARG00000096739                                                                                                                         | 414.1552786 | 1.487121852    | 0.164812088 | 9.023135777  | 1.82781E-19 | 1.36575E-16 | si:dkey-219e21.2  | ZDB-GENE-141215-26   | si:dkey-219e21.2  |
| ENSDARG00000099517                                                                                                                         | 448.5743415 | -1.53340625    | 0.172009343 | -8.91466836  | 4.89278E-19 | 3.50969E-16 | adssl1            | ZDB-GENE-040516-18   | adssl1            |
| ENSDARG00000012609                                                                                                                         | 2780.628526 | -3.02543644    | 0.341358579 | -8.862927801 | 7.79401E-19 | 5.37577E-16 | hpx a             |                      |                   |
| ENSDARG00000043154                                                                                                                         | 277.2062963 | -1.361666246   | 0.154202681 | -8.83036685  | 1.04333E-18 | 6.75066E-16 | ucp2              | ZDB-GENE-990708-8    | ucp2              |
| ENSDARG00000093494                                                                                                                         | 34.30948456 | -2.491047095   | 0.282136522 | -8.82922593  | 1.05403E-18 | 6.75066E-16 | si:ch211-217k17.9 | ZDB-GENE-061207-21   | si:ch211-217k17.9 |
| ENSDARG00000099719                                                                                                                         | 14.67071504 | -4.066006503   | 0.461859174 | -8.803563354 | 1.32539E-18 | 8.19596E-16 | cdkn1d            | ZDB-GENE-110215-1    | cdkn1d            |
| ENSDARG00000011665                                                                                                                         | 2404.031379 | -1.492223822   | 0.171877737 | -8.681891238 | 3.89242E-18 | 2.32676E-15 | aldoaa            | ZDB-GENE-030131-8369 | aldoaa            |
| ENSDARG00000003820                                                                                                                         | 236.1325412 | -3.380070604   | 0.390109135 | -8.664423102 | 4.53805E-18 | 2.62519E-15 | nr1d2a            | ZDB-GENE-040504-1    | nr1d2a            |
| ENSDARG00000011583                                                                                                                         | 75.94517877 | -1.611508517   | 0.186957057 | -8.619672049 | 6.71461E-18 | 3.76291E-15 | cry1b             | ZDB-GENE-010426-3    | cry1b             |
| ENSDARG00000041607                                                                                                                         | 158.3568523 | -1.147519095   | 0.133773682 | -8.578063193 | 9.64839E-18 | 5.24317E-15 | eif4ebp3l         | ZDB-GENE-030826-26   | eif4ebp3l         |
| ENSDARG00000067741                                                                                                                         | 231.8302681 | -1.193025069   | 0.139640145 | -8.543567988 | 1.3014E-17  | 6.86411E-15 | itpkcb            | ZDB-GENE-080225-27   | itpkcb            |
| ENSDARG00000018621                                                                                                                         | 310.8632036 | -2.65258295    | 0.311287983 | -8.521314978 | 1.57752E-17 | 8.08276E-15 | slc6a19a.1        | ZDB-GENE-070620-2    | slc6a19a.1        |
| ENSDARG00000069615                                                                                                                         | 423.9524308 | -1.991482876   | 0.234246035 | -8.501671645 | 1.8688E-17  | 9.30921E-15 | ckmt2a            | ZDB-GENE-030131-5717 | ckmt2a            |
| ENSDARG00000026771                                                                                                                         | 89.17723123 | -1.468477876   | 0.174671269 | -8.407094571 | 4.20292E-17 | 2.03705E-14 | tmem41ab          | ZDB-GENE-040426-2050 | tmem41ab          |
| ENSDARG00000075666                                                                                                                         | 286.2778819 | -2.093818693   | 0.250658102 | -8.353285504 | 6.63899E-17 | 3.13308E-14 | tsc22d3           | ZDB-GENE-040426-1433 | tsc22d3           |
| ENSDARG00000086685                                                                                                                         | 94.94352214 | -1.235898808   | 0.148557925 | -8.319305833 | 8.848E-17   | 4.06849E-14 | trim63b           | ZDB-GENE-040426-1003 | trim63b           |
| ENSDARG00000028396                                                                                                                         | 530.1083819 | -5.439724015   | 0.654577081 | -8.310287925 | 9.54701E-17 | 4.28017E-14 | fkbp5             | ZDB-GENE-030616-630  | fkbp5             |
| ENSDARG00000101778                                                                                                                         | 187.6060301 | -1.254831978   | 0.151580463 | -8.278322614 | 1.24922E-16 | 5.46398E-14 | ca5a              | ZDB-GENE-080220-57   | ca5a              |
| ENSDARG00000077236                                                                                                                         | 83.05563514 | -2.210745834   | 0.267774977 | -8.255983651 | 1.50656E-16 | 6.43266E-14 | hspb6             | ZDB-GENE-080214-7    | hspb6             |
| ENSDARG00000075282                                                                                                                         | 139.543891  | -1.584073681   | 0.19446543  | -8.14578549  | 3.76828E-16 | 1.57155E-13 | irs2b             | ZDB-GENE-081104-462  | irs2b             |
| ENSDARG00000089885                                                                                                                         | 53.83462165 | -2.237051513   | 0.275517304 | -8.11945922  | 4.68265E-16 | 1.9085E-13  | slc16a12b         | ZDB-GENE-050522-80   | slc16a12b         |
| ENSDARG00000069381                                                                                                                         | 26.06185693 | 3.368219072    | 0.417776924 | 8.062242976  | 7.49071E-16 | 2.98513E-13 | si:ch211-125e6.5  | ZDB-GENE-070912-39   | si:ch211-125e6.5  |
| ENSDARG00000007344                                                                                                                         | 220.6744697 | -1.857746893   | 0.234046134 | -7.937524358 | 2.06257E-15 | 8.04087E-13 | tcap              | ZDB-GENE-070501-5    | tcap              |
| ENSDARG00000096712                                                                                                                         | 145.2698687 | -1.898144424   | 0.240328764 | -7.898115854 | 2.83151E-15 | 1.08037E-12 | si:dkey-193p11.2  | ZDB-GENE-030131-8407 | si:dkey-193p11.2  |

|                    |             |              |             |              |             |             |                   |                      |                   |
|--------------------|-------------|--------------|-------------|--------------|-------------|-------------|-------------------|----------------------|-------------------|
| ENSDARG00000040510 | 9.390766129 | 27.9551319   | 3.561065327 | 7.850215972  | 4.15321E-15 | 1.55166E-12 | ca15b             | ZDB-GENE-040426-222  | ca15b             |
| ENSDARG00000090870 | 40.26331531 | -16.59803532 | 2.115806821 | -7.844778244 | 4.33719E-15 | 1.58732E-12 | si:ch1073-263o8.2 | ZDB-GENE-030131-5362 | si:ch1073-263o8.2 |
| ENSDARG00000103038 | 97.76709608 | -1.1334607   | 0.14571084  | -7.778835806 | 7.3195E-15  | 2.62521E-12 | pik3r3a           | ZDB-GENE-040426-1978 | pik3r3a           |
| ENSDARG00000059054 | 263.9016056 | -1.977020567 | 0.254844325 | -7.757757862 | 8.6444E-15  | 3.03961E-12 | pdk2b             | ZDB-GENE-040426-939  | pdk2b             |
| ENSDARG00000076773 | 126.57819   | 1.786486212  | 0.231115189 | 7.729852037  | 1.07672E-14 | 3.71322E-12 | lrrc58a           | ZDB-GENE-090312-76   | lrrc58a           |
| ENSDARG00000061368 | 130.392681  | -1.350177028 | 0.175465328 | -7.694836619 | 1.41675E-14 | 4.7937E-12  | klf13             | ZDB-GENE-060929-1274 | klf13             |
| ENSDARG00000003109 | 276.1385781 | 1.307409261  | 0.170745084 | 7.657082912  | 1.90204E-14 | 6.31653E-12 | rcan1a            | ZDB-GENE-040801-135  | rcan1a            |
| ENSDARG00000105039 | 26.6577159  | -2.731920678 | 0.357295126 | -7.646117953 | 2.07138E-14 | 6.75382E-12 | phka1b            | ZDB-GENE-091204-81   | phka1b            |
| ENSDARG00000056885 | 289.2717808 | -1.187092085 | 0.155484766 | -7.634780681 | 2.26205E-14 | 7.24382E-12 | per1a             | ZDB-GENE-011220-1    | per1a             |
| ENSDARG00000069377 | 27.32945936 | -3.130051839 | 0.410698622 | -7.621286445 | 2.5116E-14  | 7.90184E-12 | si:dkey-242g16.2  | ZDB-GENE-030131-8324 | si:dkey-242g16.2  |
| ENSDARG00000093237 | 7.954390689 | -4.752693581 | 0.624932757 | -7.605127955 | 2.84622E-14 | 8.80022E-12 | si:ch211-89o9.4   | ZDB-GENE-090313-134  | si:ch211-89o9.4   |
| ENSDARG00000060797 | 110.737801  | -1.363183359 | 0.180932275 | -7.534218875 | 4.91267E-14 | 1.4703E-11  | pfkmb             | ZDB-GENE-081114-1    | pfkmb             |
| ENSDARG00000042904 | 331.8452996 | -0.975650579 | 0.129517219 | -7.532979701 | 4.95953E-14 | 1.4703E-11  | foxo3b            | ZDB-GENE-990708-6    | foxo3b            |
| ENSDARG00000076520 | 26.53038433 | -2.307534296 | 0.306368746 | -7.531885441 | 5.00128E-14 | 1.4703E-11  | mafb              | ZDB-GENE-141211-38   | mafb              |
| ENSDARG00000102572 | 70.05706488 | -1.684876208 | 0.223904055 | -7.524991937 | 5.27236E-14 | 1.52499E-11 | si:ch211-260e23.9 | ZDB-GENE-141222-48   | si:ch211-260e23.9 |
| ENSDARG00000033140 | 19.26124149 | -2.02332803  | 0.270774245 | -7.472379917 | 7.87572E-14 | 2.24183E-11 | desi1a            | ZDB-GENE-040426-1657 | desi1a            |
| ENSDARG00000033614 | 118.464169  | -1.169675417 | 0.157257894 | -7.437944066 | 1.02264E-13 | 2.86548E-11 | rasgef1ba         | ZDB-GENE-030131-5783 | rasgef1ba         |
| ENSDARG00000095615 | 31.66633725 | -2.207742557 | 0.298096937 | -7.406122931 | 1.30045E-13 | 3.58785E-11 | si:dkeyp-86h10.3  | ZDB-GENE-100922-65   | si:dkeyp-86h10.3  |
| ENSDARG00000036830 | 5601.453125 | -1.146908086 | 0.155198653 | -7.38993582  | 1.469E-13   | 3.99144E-11 | krt91             | ZDB-GENE-040801-181  | krt91             |
| ENSDARG00000006137 | 12.64481614 | -4.784640059 | 0.648765723 | -7.374988977 | 1.64359E-13 | 4.39917E-11 | star              | ZDB-GENE-001120-3    | star              |
| ENSDARG00000021372 | 607.5949444 | -1.05736783  | 0.143465372 | -7.370195458 | 1.70378E-13 | 4.49322E-11 | tob1b             | ZDB-GENE-040426-2151 | tob1b             |
| ENSDARG00000061062 | 54.51913779 | 1.031090741  | 0.140052799 | 7.362157359  | 1.80961E-13 | 4.70316E-11 | nemp2             | ZDB-GENE-081104-413  | nemp2             |
| ENSDARG00000020876 | 263.3240618 | -2.102094494 | 0.291518288 | -7.210849466 | 5.56039E-13 | 1.42449E-10 | pdk2a             | ZDB-GENE-120910-1    | pdk2a             |
| ENSDARG00000002271 | 163.1787692 | -1.119758856 | 0.155833428 | -7.185613983 | 6.69058E-13 | 1.68989E-10 | zfand5b           | ZDB-GENE-040426-875  | zfand5b           |
| ENSDARG00000013721 | 2181.888068 | -1.627662477 | 0.226686662 | -7.180230476 | 6.9594E-13  | 1.73337E-10 | g6pca.2           | ZDB-GENE-050309-17   | g6pca.2           |
| ENSDARG00000069888 | 106.9338544 | -1.298223111 | 0.181009134 | -7.172141433 | 7.38336E-13 | 1.81378E-10 | cldna             | ZDB-GENE-010328-1    | cldna             |
| ENSDARG00000030604 | 41.90260072 | -1.454326079 | 0.202954212 | -7.16578417  | 7.73425E-13 | 1.8743E-10  | phkg1a            | ZDB-GENE-061103-385  | phkg1a            |
| ENSDARG00000063031 | 103.9649525 | -0.8243047   | 0.115220824 | -7.154129562 | 8.42055E-13 | 2.01341E-10 | rad54l2           | ZDB-GENE-030131-3097 | rad54l2           |
| ENSDARG00000020761 | 198.9465446 | -1.301597323 | 0.182402567 | -7.135849816 | 9.6191E-13  | 2.26973E-10 | arrdc2            | ZDB-GENE-030131-7146 | arrdc2            |
| ENSDARG00000090468 | 48.83622291 | -1.852722071 | 0.260402874 | -7.114829575 | 1.12051E-12 | 2.60963E-10 | ppp1r3aa          | ZDB-GENE-110914-122  | ppp1r3aa          |
| ENSDARG00000087392 | 15.91016015 | 16.21097687  | 2.294777738 | 7.064290627  | 1.61439E-12 | 3.71164E-10 | si:ch73-160p18.3  | ZDB-GENE-141212-268  | si:ch73-160p18.3  |
| ENSDARG00000037618 | 102.7295178 | -3.156854777 | 0.447942209 | -7.047459952 | 1.82213E-12 | 4.13624E-10 | ddit4             | ZDB-GENE-031002-35   | ddit4             |
| ENSDARG00000014053 | 67.45986768 | -2.251827407 | 0.321415837 | -7.005962832 | 2.45293E-12 | 5.49855E-10 | olfm1b            | ZDB-GENE-040801-228  | olfm1b            |
| ENSDARG00000014179 | 203.5803529 | -1.466793064 | 0.210315651 | -6.974245889 | 3.07516E-12 | 6.80825E-10 | pfkma             | ZDB-GENE-040912-135  | pfkma             |
| ENSDARG00000097959 | 167.2246746 | -2.029066125 | 0.291088284 | -6.970621061 | 3.15545E-12 | 6.90081E-10 | si:dkey-248g15.3  | ZDB-GENE-131127-95   | si:dkey-248g15.3  |
| ENSDARG00000042055 | 44.11375974 | -2.356974485 | 0.338646433 | -6.95998616  | 3.40306E-12 | 7.35266E-10 | fam129aa          | ZDB-GENE-041014-181  | fam129aa          |
| ENSDARG00000011122 | 141.8906159 | -1.582041371 | 0.228027182 | -6.93795082  | 3.97828E-12 | 8.49316E-10 | pptc7a            | ZDB-GENE-041114-74   | pptc7a            |
| ENSDARG00000069095 | 57.29527822 | -1.258088041 | 0.181405089 | -6.935241161 | 4.05529E-12 | 8.5557E-10  | gls2a             | ZDB-GENE-081105-57   | gls2a             |
| ENSDARG00000104576 | 178.9488895 | -2.479418039 | 0.357655918 | -6.932411605 | 4.13726E-12 | 8.62715E-10 | si:ch211-152c8.5  | ZDB-GENE-030131-5764 | si:ch211-152c8.5  |
| ENSDARG00000018478 | 1006.943139 | -1.26996485  | 0.183268504 | -6.929531399 | 4.22237E-12 | 8.70342E-10 | agxtb             | ZDB-GENE-010302-3    | agxtb             |
| ENSDARG00000090814 | 48.20103479 | -1.637556623 | 0.236872136 | -6.913251382 | 4.73669E-12 | 9.65263E-10 | si:dkey-18a10.3   | ZDB-GENE-091204-174  | si:dkey-18a10.3   |
| ENSDARG00000034181 | 79.02328018 | -1.542411098 | 0.223314892 | -6.906888665 | 4.95398E-12 | 9.982E-10   | esr2b             | ZDB-GENE-030116-1    | esr2b             |
| ENSDARG00000091234 | 36.40978774 | -2.052795975 | 0.298008722 | -6.888375476 | 5.64331E-12 | 1.12446E-09 | si:ch73-335l21.4  | ZDB-GENE-160728-105  | si:ch73-335l21.4  |
| ENSDARG00000055518 | 760.7427117 | -1.381686904 | 0.200789985 | -6.881254095 | 5.93279E-12 | 1.16915E-09 | pygma             | ZDB-GENE-050522-482  | pygma             |
| ENSDARG00000044010 | 76.68547307 | -1.292447138 | 0.188047124 | -6.872996041 | 6.28673E-12 | 1.22543E-09 | loxl2a            | ZDB-GENE-070818-1    | loxl2a            |
| ENSDARG00000028804 | 135.6242268 | -1.335833868 | 0.194897772 | -6.854023286 | 7.18014E-12 | 1.37541E-09 | ankrd9            | ZDB-GENE-041114-3    | ankrd9            |
| ENSDARG00000075301 | 15.78589951 | -4.44782335  | 0.648991399 | -6.853439598 | 7.20951E-12 | 1.37541E-09 | gsdf              | ZDB-GENE-101029-3    | gsdf              |
| ENSDARG00000015164 | 628.6450649 | -1.04173519  | 0.152385631 | -6.836177268 | 8.13343E-12 | 1.53533E-09 | mknk2b            | ZDB-GENE-030829-2    | mknk2b            |
| ENSDARG00000106630 | 11.83782273 | -2.618900248 | 0.384333411 | -6.814136303 | 9.48318E-12 | 1.77148E-09 | L0018627.1        |                      |                   |

|                    |             |              |             |              |             |             |                   |                      |                   |
|--------------------|-------------|--------------|-------------|--------------|-------------|-------------|-------------------|----------------------|-------------------|
| ENSDARG00000021250 | 53.92396603 | -2.370995266 | 0.348458773 | -6.804234665 | 1.01588E-11 | 1.87812E-09 | slc25a48          | ZDB-GENE-040718-60   | slc25a48          |
| ENSDARG00000055523 | 163.2827773 | -1.319073188 | 0.194234797 | -6.791127063 | 1.11261E-11 | 2.03596E-09 | slc22a6l          | ZDB-GENE-040426-2249 | slc22a6l          |
| ENSDARG00000078619 | 539.8285291 | -1.778260432 | 0.262515201 | -6.773933183 | 1.25328E-11 | 2.2702E-09  | pnp5a             | ZDB-GENE-040426-2553 | pnp5a             |
| ENSDARG00000027744 | 167.5747259 | -1.982004729 | 0.292842693 | -6.768154971 | 1.30435E-11 | 2.33909E-09 | gadd45ba          | ZDB-GENE-040426-1971 | gadd45ba          |
| ENSDARG00000033160 | 498.1319466 | -1.045905283 | 0.154666243 | -6.762337181 | 1.35783E-11 | 2.41089E-09 | nr1d1             | ZDB-GENE-050105-1    | nr1d1             |
| ENSDARG00000070914 | 314.0507767 | -0.897870436 | 0.132912858 | -6.755331643 | 1.42509E-11 | 2.5055E-09  | dup6              | ZDB-GENE-030613-1    | dup6              |
| ENSDARG00000038429 | 130.2648377 | -1.027098417 | 0.152491054 | -6.735466709 | 1.63405E-11 | 2.84498E-09 | csnrp1b           | ZDB-GENE-030131-1515 | csnrp1b           |
| ENSDARG00000042807 | 134.0536702 | -1.139853061 | 0.169583859 | -6.721471402 | 1.79899E-11 | 3.10204E-09 | slc16a4           | ZDB-GENE-070112-602  | slc16a4           |
| ENSDARG00000078297 | 48.75673985 | 1.599475633  | 0.23985858  | 6.668411163  | 2.58587E-11 | 4.41643E-09 | ptprh             | ZDB-GENE-091118-90   | ptprh             |
| ENSDARG0000007682  | 758.4870963 | -1.473458935 | 0.221604931 | -6.649034956 | 2.95021E-11 | 4.99114E-09 | ppdpfa            | ZDB-GENE-030219-204  | ppdpfa            |
| ENSDARG00000061242 | 186.1663469 | -1.116956163 | 0.168099087 | -6.644629553 | 3.03981E-11 | 5.09466E-09 | tuft1a            | ZDB-GENE-061103-184  | tuft1a            |
| ENSDARG00000078394 | 4.975737802 | 31.48659908  | 4.762063474 | 6.611965433  | 3.79251E-11 | 6.29732E-09 | CABZ01059627.1    |                      |                   |
| ENSDARG00000056795 | 72.3316185  | -1.216170837 | 0.184411984 | -6.594857953 | 4.25663E-11 | 7.00314E-09 | serpine1          | ZDB-GENE-070912-60   | serpine1          |
| ENSDARG00000098103 | 134.5789462 | -0.977219773 | 0.149523895 | -6.535542507 | 6.33794E-11 | 1.03326E-08 | tefb              | ZDB-GENE-050522-224  | tefb              |
| ENSDARG00000105499 | 8.933914054 | 16.69354671  | 2.560662096 | 6.519230606  | 7.06689E-11 | 1.14172E-08 | zgc:175135        | ZDB-GENE-080214-1    | zgc:175135        |
| ENSDARG00000069282 | 16.89652459 | -2.072046837 | 0.319208711 | -6.49119765  | 8.51567E-11 | 1.3635E-08  | bbc3              | ZDB-GENE-070119-4    | bbc3              |
| ENSDARG00000031702 | 65.91818218 | -1.317186468 | 0.204644927 | -6.436448185 | 1.22302E-10 | 1.93635E-08 | prkg1b            | ZDB-GENE-080225-40   | prkg1b            |
| ENSDARG00000043009 | 158.7153387 | -0.787840024 | 0.122421565 | -6.435467683 | 1.23094E-10 | 1.93635E-08 | fam43a            | ZDB-GENE-030131-6098 | fam43a            |
| ENSDARG00000040059 | 111.0650733 | -1.65324438  | 0.257689734 | -6.415949955 | 1.39947E-10 | 2.18233E-08 | gbp               | ZDB-GENE-990714-7    | gbp               |
| ENSDARG00000038398 | 15.00577126 | -1.755853267 | 0.273803453 | -6.412823687 | 1.42849E-10 | 2.20837E-08 | pmm1              | ZDB-GENE-180314-1    | pmm1              |
| ENSDARG00000035869 | 920.6705713 | -0.568304293 | 0.089071395 | -6.380323234 | 1.76715E-10 | 2.70857E-08 | azin1b            | ZDB-GENE-030121-1    | azin1b            |
| ENSDARG00000069540 | 26.33426923 | -1.144832509 | 0.183237942 | -6.247791798 | 4.16296E-10 | 6.32664E-08 | si:dkey-30c15.2   | ZDB-GENE-060503-543  | si:dkey-30c15.2   |
| ENSDARG00000020455 | 61.03755574 | -0.969416386 | 0.155280619 | -6.242996646 | 4.29266E-10 | 6.46893E-08 | si:ch211-171h4.3  | ZDB-GENE-081031-85   | si:ch211-171h4.3  |
| ENSDARG00000076895 | 75.79404621 | 0.770717072  | 0.124945537 | 6.168424183  | 6.89739E-10 | 1.03076E-07 | flrt3             | ZDB-GENE-030131-1988 | flrt3             |
| ENSDARG00000096849 | 107.1919847 | -0.862527584 | 0.139894078 | -6.165576096 | 7.0227E-10  | 1.04081E-07 | si:dkey-16p21.8   | ZDB-GENE-131121-428  | si:dkey-16p21.8   |
| ENSDARG00000054835 | 23.71175891 | -1.613893038 | 0.261847123 | -6.163493481 | 7.11573E-10 | 1.04595E-07 | ugt5f1            | ZDB-GENE-100406-6    | ugt5f1            |
| ENSDARG00000060109 | 30.04494609 | 1.173637639  | 0.190607027 | 6.157368156  | 7.39638E-10 | 1.07837E-07 | aggf1             | ZDB-GENE-060929-836  | aggf1             |
| ENSDARG00000092126 | 11.67012718 | -5.152473942 | 0.838036884 | -6.148266313 | 7.83344E-10 | 1.13288E-07 | vtg5              | ZDB-GENE-001201-4    | vtg5              |
| ENSDARG00000020645 | 132.314852  | -1.137775562 | 0.185321034 | -6.139484224 | 8.27898E-10 | 1.18774E-07 | slc7a3a           | ZDB-GENE-041114-206  | slc7a3a           |
| ENSDARG00000035719 | 47.81105902 | -2.056036119 | 0.334971554 | -6.137942453 | 8.35971E-10 | 1.1898E-07  | arl5c             | ZDB-GENE-040426-1866 | arl5c             |
| ENSDARG00000031616 | 56.80693832 | -1.212831537 | 0.197638236 | -6.136623973 | 8.42936E-10 | 1.19027E-07 | g6pca.1           | ZDB-GENE-031001-4    | g6pca.1           |
| ENSDARG00000093584 | 40.98829869 | -2.331251377 | 0.380255221 | -6.130754417 | 8.74633E-10 | 1.22537E-07 | zgc:193505        | ZDB-GENE-030131-7103 | zgc:193505        |
| ENSDARG00000012366 | 48.00462376 | -1.229702705 | 0.201040818 | -6.116681772 | 9.55439E-10 | 1.32821E-07 | fbp2              | ZDB-GENE-040822-23   | fbp2              |
| ENSDARG00000095434 | 14.43394992 | -2.814916037 | 0.461956408 | -6.09346681  | 1.10491E-09 | 1.52418E-07 | si:ch211-217k17.8 | ZDB-GENE-031010-46   | si:ch211-217k17.8 |
| ENSDARG00000091260 | 132.01416   | -1.058388753 | 0.175135913 | -6.04324227  | 1.51048E-09 | 2.06774E-07 | mylk4a            | ZDB-GENE-120824-2    | mylk4a            |
| ENSDARG00000028017 | 83.36313864 | -2.136470262 | 0.355427486 | -6.010987746 | 1.84396E-09 | 2.50514E-07 | tp53inp1          | ZDB-GENE-031018-3    | tp53inp1          |
| ENSDARG00000098761 | 25.45616945 | -1.853134021 | 0.30915917  | -5.994109824 | 2.04603E-09 | 2.75876E-07 | rgs2              | ZDB-GENE-040718-410  | rgs2              |
| ENSDARG00000040815 | 442.5965278 | -0.827524443 | 0.138338615 | -5.981875996 | 2.20582E-09 | 2.95202E-07 | tsku              | ZDB-GENE-030131-4683 | tsku              |
| ENSDARG00000058094 | 294.2737347 | -0.782684571 | 0.131182798 | -5.966365879 | 2.42596E-09 | 3.22257E-07 | ciarta            | ZDB-GENE-030131-7016 | ciarta            |
| ENSDARG00000103826 | 327.7713301 | -1.128185265 | 0.189206895 | -5.962706947 | 2.48093E-09 | 3.27136E-07 | gpib              | ZDB-GENE-020513-3    | gpib              |
| ENSDARG00000015611 | 34.07155095 | -1.248978652 | 0.209533549 | -5.960757405 | 2.51071E-09 | 3.28647E-07 | rasl11b           | ZDB-GENE-040426-793  | rasl11b           |
| ENSDARG00000002745 | 1090.714489 | -0.518178362 | 0.087035954 | -5.953612684 | 2.62287E-09 | 3.4084E-07  | tdh               | ZDB-GENE-040426-2379 | tdh               |
| ENSDARG00000088813 | 81.85010095 | -1.326053829 | 0.223148103 | -5.942483083 | 2.80737E-09 | 3.62191E-07 | ppp1r3ab          | ZDB-GENE-050309-246  | ppp1r3ab          |
| ENSDARG00000005104 | 140.5162141 | -0.672470571 | 0.113258646 | -5.937476719 | 2.89442E-09 | 3.70755E-07 | limk2             | ZDB-GENE-040718-398  | limk2             |
| ENSDARG00000102020 | 111.5294555 | -1.028667444 | 0.173355276 | -5.933868669 | 2.95879E-09 | 3.76311E-07 | pnpla3            | ZDB-GENE-040718-27   | pnpla3            |
| ENSDARG00000020114 | 151.9891844 | -1.15036388  | 0.19391837  | -5.932206851 | 2.9889E-09  | 3.77464E-07 | slc20a1a          | ZDB-GENE-040426-2217 | slc20a1a          |
| ENSDARG00000038583 | 150.7398641 | -1.081483715 | 0.182854625 | -5.914445501 | 3.32995E-09 | 4.17595E-07 | abraa             | ZDB-GENE-120730-1    | abraa             |
| ENSDARG00000055283 | 137.7034132 | 0.743130398  | 0.125779251 | 5.908211357  | 3.45842E-09 | 4.29594E-07 | id2a              | ZDB-GENE-020910-1    | id2a              |
| ENSDARG00000003281 | 49.75440558 | -1.407562431 | 0.238267336 | -5.9074922   | 3.47355E-09 | 4.29594E-07 | pik3ip1           | ZDB-GENE-031030-14   | pik3ip1           |

|                    |             |              |             |              |             |             |                   |                      |                   |
|--------------------|-------------|--------------|-------------|--------------|-------------|-------------|-------------------|----------------------|-------------------|
| ENSDARG00000105403 | 73.05777163 | -1.272777922 | 0.215583418 | -5.903876711 | 3.55058E-09 | 4.36113E-07 | abcc6b.1          | ZDB-GENE-050517-19   | abcc6b.1          |
| ENSDARG00000104292 | 50.42321371 | -0.894089735 | 0.152344465 | -5.86886918  | 4.38777E-09 | 5.35279E-07 | ccn2b             | ZDB-GENE-070705-82   | ccn2b             |
| ENSDARG00000053961 | 42.8396183  | -1.387606375 | 0.237144532 | -5.851310856 | 4.87714E-09 | 5.90957E-07 | slc2a11a          | ZDB-GENE-080723-20   | slc2a11a          |
| ENSDARG00000099614 | 169.3642868 | 0.552265612  | 0.094620507 | 5.836637606  | 5.32648E-09 | 6.41072E-07 | purab             | ZDB-GENE-141216-78   | purab             |
| ENSDARG00000016290 | 1333.734282 | 1.170430546  | 0.200700319 | 5.831732366  | 5.48549E-09 | 6.55808E-07 | clca1             | ZDB-GENE-030131-6221 | clca1             |
| ENSDARG00000020693 | 443.3608104 | -0.713898774 | 0.122646144 | -5.820800786 | 5.85663E-09 | 6.95543E-07 | sesn1             | ZDB-GENE-040718-408  | sesn1             |
| ENSDARG00000104470 | 89.02997551 | -0.992953188 | 0.170631785 | -5.81927445  | 5.91036E-09 | 6.97306E-07 | syngnr2b          | ZDB-GENE-070424-19   | syngnr2b          |
| ENSDARG00000016143 | 127.8139121 | -0.844136078 | 0.145106674 | -5.817348405 | 5.97884E-09 | 7.00775E-07 | xiap              | ZDB-GENE-030825-7    | xiap              |
| ENSDARG00000040253 | 62.46944014 | -1.787219213 | 0.308571174 | -5.791918899 | 6.95867E-09 | 8.10324E-07 | onecutl           | ZDB-GENE-020531-1    | onecutl           |
| ENSDARG00000019498 | 36.29018107 | -1.49463278  | 0.25990193  | -5.750756765 | 8.88449E-09 | 1.02791E-06 | cry5              | ZDB-GENE-010426-8    | cry5              |
| ENSDARG00000077982 | 114.4860993 | 1.030778269  | 0.179314605 | 5.748434541  | 9.00735E-09 | 1.03544E-06 | elf3              | ZDB-GENE-030131-8760 | elf3              |
| ENSDARG00000031426 | 25.39200654 | -1.268224891 | 0.220741273 | -5.745300248 | 9.1758E-09  | 1.04809E-06 | csnrp1a           | ZDB-GENE-070912-475  | csnrp1a           |
| ENSDARG00000041433 | 553.2621876 | -1.641228597 | 0.285925196 | -5.740062856 | 9.46414E-09 | 1.07418E-06 | si:dkey-7c18.24   | ZDB-GENE-041014-63   | si:dkey-7c18.24   |
| ENSDARG00000057571 | 846.9048483 | -0.941285891 | 0.164111037 | -5.735664763 | 9.71306E-09 | 1.0955E-06  | pgam2             | ZDB-GENE-040116-6    | pgam2             |
| ENSDARG00000007693 | 252.6128494 | -0.942173137 | 0.164638382 | -5.722682176 | 1.04855E-08 | 1.16906E-06 | nfkbiab           | ZDB-GENE-030131-1819 | nfkbiab           |
| ENSDARG00000017049 | 156.2836699 | -0.717627142 | 0.125404079 | -5.722518329 | 1.04957E-08 | 1.16906E-06 | adsl              | ZDB-GENE-030131-6363 | adsl              |
| ENSDARG00000058371 | 7784.575101 | -0.835183734 | 0.146652337 | -5.694990949 | 1.23378E-08 | 1.36577E-06 | krt5              | ZDB-GENE-991110-23   | krt5              |
| ENSDARG00000027355 | 2505.201806 | -0.704312934 | 0.123700551 | -5.693692798 | 1.24321E-08 | 1.36776E-06 | slc25a4           | ZDB-GENE-030131-5275 | slc25a4           |
| ENSDARG00000039093 | 1349.623767 | -0.616681555 | 0.108784373 | -5.668843193 | 1.43765E-08 | 1.57203E-06 | got1              | ZDB-GENE-040426-2003 | got1              |
| ENSDARG00000019541 | 697.8367496 | -0.670306432 | 0.118324054 | -5.66500564  | 1.4702E-08  | 1.59788E-06 | gpt2l             | ZDB-GENE-050302-11   | gpt2l             |
| ENSDARG00000058285 | 59.41922036 | -1.149332768 | 0.204902973 | -5.609156139 | 2.03316E-08 | 2.19642E-06 | cpt1b             | ZDB-GENE-041010-9    | cpt1b             |
| ENSDARG00000045423 | 22.06476979 | -15.38848842 | 2.744050142 | -5.607947241 | 2.0474E-08  | 2.19857E-06 | si:ch211-146110.8 | ZDB-GENE-160113-6    | si:ch211-146110.8 |
| ENSDARG00000101362 | 68.95832242 | -1.202858662 | 0.214658854 | -5.603582791 | 2.09966E-08 | 2.24126E-06 | mibp              | ZDB-GENE-030404-1    | mibp              |
| ENSDARG00000025428 | 76.81668131 | -1.886419884 | 0.237585205 | -5.587981507 | 2.29724E-08 | 2.43766E-06 | socs3a            | ZDB-GENE-030131-7349 | socs3a            |
| ENSDARG00000033566 | 5.085319212 | -4.399698052 | 0.788182925 | -5.582077345 | 2.37663E-08 | 2.50706E-06 | cyp17a1           | ZDB-GENE-040213-2    | cyp17a1           |
| ENSDARG00000074624 | 343.0883167 | 0.370103834  | 0.066330736 | 5.579673221  | 2.40971E-08 | 2.52041E-06 | si:ch211-198a12.6 | ZDB-GENE-030131-1683 | si:ch211-198a12.6 |
| ENSDARG00000040278 | 5.278019779 | -2.254593885 | 0.404112864 | -5.579119313 | 2.41739E-08 | 2.52041E-06 | klhl38b           | ZDB-GENE-120727-8    | klhl38b           |
| ENSDARG00000020298 | 119.7201683 | -1.406627758 | 0.252531062 | -5.570117785 | 2.54567E-08 | 2.63882E-06 | btg2              | ZDB-GENE-000210-15   | btg2              |
| ENSDARG00000041602 | 42.29408662 | -0.834948123 | 0.150187939 | -5.559355371 | 2.70773E-08 | 2.79067E-06 | zgc:92335         | ZDB-GENE-040718-152  | zgc:92335         |
| ENSDARG00000059923 | 76.58200978 | -0.88385602  | 0.159432495 | -5.54376334  | 2.96039E-08 | 3.03364E-06 | slc25a47a         | ZDB-GENE-060616-266  | slc25a47a         |
| ENSDARG00000063572 | 867.7332935 | -0.619291929 | 0.111946106 | -5.532054216 | 3.16502E-08 | 3.21598E-06 | perp              | ZDB-GENE-050104-1    | perp              |
| ENSDARG00000041051 | 65.62418397 | -1.256619045 | 0.227173193 | -5.53154634  | 3.1742E-08  | 3.21598E-06 | mid1ip1a          | ZDB-GENE-990415-81   | mid1ip1a          |
| ENSDARG00000058322 | 77.48477465 | -0.740252296 | 0.134032775 | -5.522920025 | 3.33412E-08 | 3.35903E-06 | enc3              | ZDB-GENE-030131-5742 | enc3              |
| ENSDARG00000058218 | 190.7421744 | 0.994777077  | 0.180437159 | 5.513149752  | 3.52468E-08 | 3.53118E-06 | fam151a           | ZDB-GENE-070705-105  | fam151a           |
| ENSDARG00000075698 | 68.11608632 | 1.287278683  | 0.233783592 | 5.506283286  | 3.66489E-08 | 3.65124E-06 | nkpd1             | ZDB-GENE-141215-19   | nkpd1             |
| ENSDARG00000063229 | 158.5396273 | 0.726138162  | 0.131922226 | 5.50428979   | 3.70659E-08 | 3.6724E-06  | xpo1b             | ZDB-GENE-070530-6    | xpo1b             |
| ENSDARG00000100952 | 634.3897454 | -1.25076487  | 0.22739518  | -5.500401864 | 3.78927E-08 | 3.73368E-06 | wu:fj16a03        | ZDB-GENE-030131-7415 | wu:fj16a03        |
| ENSDARG00000037099 | 84.99516129 | -2.281508825 | 0.414929388 | -5.498547208 | 3.82933E-08 | 3.75253E-06 | irs2a             | ZDB-GENE-040426-975  | irs2a             |
| ENSDARG00000036833 | 38.0507555  | -2.796522383 | 0.51206536  | -5.461260616 | 4.72765E-08 | 4.60766E-06 | upp2              | ZDB-GENE-040426-830  | upp2              |
| ENSDARG00000058678 | 39.60193673 | 1.09056891   | 0.201077153 | 5.423634123  | 5.83994E-08 | 5.66095E-06 | aqp10b            | ZDB-GENE-060503-57   | aqp10b            |
| ENSDARG00000076779 | 475.7810483 | -0.641780375 | 0.118391179 | -5.420846229 | 5.93176E-08 | 5.71904E-06 | fam13b            | ZDB-GENE-030131-4913 | fam13b            |
| ENSDARG00000092931 | 103.4164754 | 1.194120316  | 0.222503895 | 5.366738938  | 8.0173E-08  | 7.68846E-06 | si:ch211-114c12.5 | ZDB-GENE-060526-13   | si:ch211-114c12.5 |
| ENSDARG00000036107 | 853.4621967 | -0.863466867 | 0.161966715 | -5.331137734 | 9.75994E-08 | 9.29889E-06 | txnipa            | ZDB-GENE-030804-10   | txnipa            |
| ENSDARG00000099954 | 95.05040735 | -0.690116862 | 0.129468409 | -5.330388066 | 9.80031E-08 | 9.29889E-06 | plekhm1           | ZDB-GENE-030131-2752 | plekhm1           |
| ENSDARG00000009505 | 362.0432403 | -0.924585201 | 0.17457116  | -5.296322735 | 1.18158E-07 | 1.11522E-05 | prelid3b          | ZDB-GENE-031002-13   | prelid3b          |
| ENSDARG00000075564 | 132.6191954 | -0.923783839 | 0.174454241 | -5.295278779 | 1.18835E-07 | 1.11574E-05 | fam13a            | ZDB-GENE-050208-102  | fam13a            |
| ENSDARG00000094265 | 21.24000331 | 1.452535901  | 0.274934617 | 5.283204845  | 1.26943E-07 | 1.18566E-05 | si:dkey-183n20.15 | ZDB-GENE-041001-160  | si:dkey-183n20.15 |
| ENSDARG00000074663 | 79.14999591 | -0.914434446 | 0.174280679 | -5.246906606 | 1.54674E-07 | 1.43719E-05 | SAMD8             | ZDB-GENE-070410-30   | zgc:162183        |
| ENSDARG00000060051 | 123.0987004 | -0.914792526 | 0.175089118 | -5.224725181 | 1.74414E-07 | 1.61225E-05 | slc47a2.1         | ZDB-GENE-070112-1472 | slc47a2.1         |

|                    |             |              |             |               |             |             |                     |                      |                   |
|--------------------|-------------|--------------|-------------|---------------|-------------|-------------|---------------------|----------------------|-------------------|
| ENSDARG00000034600 | 116.7635806 | -0.5511569   | 0.105910464 | -5.203989092  | 1.95055E-07 | 1.79381E-05 | tmem165             | ZDB-GENE-030131-3222 | tmem165           |
| ENSDARG00000052779 | 20.95896098 | -2.816734407 | 0.541703885 | -5.199767783  | 1.99538E-07 | 1.82567E-05 | zgc:153932          | ZDB-GENE-070209-223  | zgc:153932        |
| ENSDARG00000087844 | 36.43257045 | -0.915476752 | 0.17623536  | -5.194625835  | 2.05132E-07 | 1.86733E-05 | plekhn1             | ZDB-GENE-090313-357  | plekhn1           |
| ENSDARG00000105498 | 9.376054523 | -1.483566251 | 0.286299013 | -5.181876937  | 2.19664E-07 | 1.98162E-05 | TSC2D23 (1 of many) | ZDB-GENE-160114-28   | si:ch211-220e11.3 |
| ENSDARG00000097855 | 117.8529278 | 0.914817203  | 0.176548426 | 5.181678605   | 2.19898E-07 | 1.98162E-05 | BX323586.3          |                      |                   |
| ENSDARG00000077396 | 188.80349   | -0.709492608 | 0.137107175 | -5.17472996   | 2.28241E-07 | 2.04652E-05 | tlcd2               | ZDB-GENE-080204-81   | tlcd2             |
| ENSDARG00000099395 | 24.30134421 | -1.032922196 | 0.199810547 | -5.169507859  | 2.34711E-07 | 2.09407E-05 | cables1             | ZDB-GENE-070912-509  | cables1           |
| ENSDARG00000012968 | 185.9436121 | -0.523443373 | 0.10132113  | -5.1666181766 | 2.38924E-07 | 2.12111E-05 | rhoub               | ZDB-GENE-050417-308  | rhoub             |
| ENSDARG00000014577 | 87.40177329 | -0.763263755 | 0.148223475 | -5.149412093  | 2.61304E-07 | 2.30836E-05 | rhpn2               | ZDB-GENE-030131-9927 | rhpn2             |
| ENSDARG00000026500 | 18.10558618 | -1.381807856 | 0.268449276 | -5.147370391  | 2.64163E-07 | 2.32218E-05 | xkr9                | ZDB-GENE-060421-6224 | xkr9              |
| ENSDARG00000114503 | 28.36675513 | -1.141435473 | 0.222078144 | -5.139792021  | 2.75043E-07 | 2.39508E-05 | phtf2               | ZDB-GENE-040711-4    | phtf2             |
| ENSDARG00000002396 | 69.4313274  | -0.75621485  | 0.147131121 | -5.139734187  | 2.75127E-07 | 2.39508E-05 | cry-dash            | ZDB-GENE-040617-2    | cry-dash          |
| ENSDARG00000100792 | 1075.127895 | -1.22075384  | 0.238017794 | -5.128834364  | 2.91542E-07 | 2.52571E-05 | zgc:154142          | ZDB-GENE-070615-2    | zgc:154142        |
| ENSDARG00000034941 | 57.295966   | 1.096568864  | 0.213933828 | 5.125738537   | 2.96374E-07 | 2.55523E-05 | si:dkey-224e22.2    | ZDB-GENE-061207-59   | si:dkey-224e22.2  |
| ENSDARG00000028517 | 54.84244944 | -1.140119243 | 0.222791024 | -5.117437953  | 3.09714E-07 | 2.65746E-05 | hbp1                | ZDB-GENE-050522-414  | hbp1              |
| ENSDARG00000116430 | 5.118997162 | -3.816652921 | 0.746165339 | -5.115023067  | 3.13703E-07 | 2.67887E-05 | si:ch73-329n5.2     | ZDB-GENE-131121-66   | si:ch73-329n5.2   |
| ENSDARG00000091127 | 372.2469986 | -0.75117844  | 0.146911511 | -5.113133538  | 3.16855E-07 | 2.69297E-05 | klf15               | ZDB-GENE-030131-7844 | klf15             |
| ENSDARG00000009459 | 16.94696219 | -1.297068551 | 0.25427032  | -5.10114021   | 3.37613E-07 | 2.85586E-05 | slc35e4             | ZDB-GENE-050417-407  | slc35e4           |
| ENSDARG00000101135 | 52.95969954 | -1.091469175 | 0.21502215  | -5.076077857  | 3.85305E-07 | 3.24398E-05 | si:dkey-85k7.7      | ZDB-GENE-040128-7    | si:dkey-85k7.7    |
| ENSDARG00000099860 | 1211.850691 | -0.845077905 | 0.166932282 | -5.062399515  | 4.14012E-07 | 3.46938E-05 | pkmb                | ZDB-GENE-040801-230  | pkmb              |
| ENSDARG00000033832 | 964.6956993 | -1.295357397 | 0.256400272 | -5.05209057   | 4.37E-07    | 3.64499E-05 | ampd1               | ZDB-GENE-040426-1906 | ampd1             |
| ENSDARG00000101637 | 227.2582874 | 0.605558982  | 0.11995362  | 5.048275999   | 4.45815E-07 | 3.70129E-05 | ccnd1               | ZDB-GENE-980526-176  | ccnd1             |
| ENSDARG00000041554 | 109.9917485 | 0.983975529  | 0.195045876 | 5.044841487   | 4.53898E-07 | 3.75103E-05 | unc93a              | ZDB-GENE-041014-304  | unc93a            |
| ENSDARG00000059824 | 39.90990609 | -2.445438729 | 0.485928356 | -5.0325088    | 4.84102E-07 | 3.9823E-05  | soat2               | ZDB-GENE-061013-742  | soat2             |
| ENSDARG00000103294 | 84.29951124 | 0.785133783  | 0.156216385 | 5.025937483   | 5.00979E-07 | 4.10231E-05 | si:ch211-221j21.3   | ZDB-GENE-030131-1805 | si:ch211-221j21.3 |
| ENSDARG00000018111 | 56.1845452  | -0.717552598 | 0.143154387 | -5.012438765  | 5.37445E-07 | 4.38091E-05 | kdm7aa              | ZDB-GENE-030131-9829 | kdm7aa            |
| ENSDARG00000054222 | 121.5195122 | 0.686582482  | 0.13711716  | 5.007268825   | 5.52078E-07 | 4.47983E-05 | fbxl8               | ZDB-GENE-051120-81   | fbxl8             |
| ENSDARG00000032272 | 16.59558397 | -1.116403838 | 0.223338592 | -4.998705465  | 5.77165E-07 | 4.6623E-05  | sat1b               | ZDB-GENE-041001-39   | sat1b             |
| ENSDARG00000068763 | 143.0070514 | 0.630369608  | 0.12650647  | 4.982904102   | 6.2637E-07  | 5.03708E-05 | plcg2               | ZDB-GENE-030131-9532 | plcg2             |
| ENSDARG00000068763 | 143.0070514 | 0.630369608  | 0.12650647  | 4.982904102   | 6.2637E-07  | 5.03708E-05 | plcg2               | ZDB-GENE-050419-140  | meak7             |
| ENSDARG00000087093 | 60.60172512 | -1.548606477 | 0.31087175  | -4.981496316  | 6.30945E-07 | 5.05122E-05 | si:ch211-157c3.4    | ZDB-GENE-030131-8454 | si:ch211-157c3.4  |
| ENSDARG00000045444 | 73.01851394 | 0.914426573  | 0.183728758 | 4.977046509   | 6.45618E-07 | 5.12373E-05 | fzd8a               | ZDB-GENE-000328-3    | fzd8a             |
| ENSDARG00000032197 | 30.44438066 | -0.966912199 | 0.194275444 | -4.977017049  | 6.45716E-07 | 5.12373E-05 | klf12b              | ZDB-GENE-071004-22   | klf12b            |
| ENSDARG00000056226 | 221.7050368 | 0.722898809  | 0.145552822 | 4.966573638   | 6.81462E-07 | 5.38355E-05 | creb3l3a            | ZDB-GENE-030131-4298 | creb3l3a          |
| ENSDARG00000056141 | 226.4510902 | -0.517074621 | 0.104476781 | -4.949182175  | 7.4526E-07  | 5.86173E-05 | coq10b              | ZDB-GENE-050417-263  | coq10b            |
| ENSDARG00000019810 | 77.01386623 | 0.552413511  | 0.111671457 | 4.946774453   | 7.54533E-07 | 5.90875E-05 | nfe2l3              | ZDB-GENE-040426-2334 | nfe2l3            |
| ENSDARG00000011618 | 101.6020293 | -1.127403568 | 0.228225915 | -4.939857807  | 7.81796E-07 | 6.09563E-05 | slc26a2             | ZDB-GENE-030717-3    | slc26a2           |
| ENSDARG00000116806 | 229.9759762 | -0.887440522 | 0.180079366 | -4.928052237  | 8.30534E-07 | 6.44761E-05 | CU693479.1          |                      |                   |
| ENSDARG00000092551 | 5.668152371 | -3.730848138 | 0.758159405 | -4.920928388  | 8.61346E-07 | 6.65799E-05 | si:dkey-56e3.2      | ZDB-GENE-090313-316  | si:dkey-56e3.2    |
| ENSDARG00000032618 | 63.10175182 | 0.889474061  | 0.180957844 | 4.915366157   | 8.86167E-07 | 6.82044E-05 | mgst1.1             | ZDB-GENE-041010-30   | mgst1.1           |
| ENSDARG00000104687 | 28.92225509 | 1.269449485  | 0.259780258 | 4.886628003   | 1.02578E-06 | 7.86122E-05 | slc16a9b            | ZDB-GENE-040801-69   | slc16a9b          |
| ENSDARG00000077473 | 172.0126919 | -0.971156341 | 0.198819814 | -4.884605417  | 1.03636E-06 | 7.90854E-05 | mych                | ZDB-GENE-030219-51   | mych              |
| ENSDARG00000055412 | 43.67825506 | -1.083306769 | 0.221913161 | -4.881669773  | 1.05191E-06 | 7.9932E-05  | mylk4b              | ZDB-GENE-041001-128  | mylk4b            |
| ENSDARG00000016875 | 430.5495735 | -0.574281656 | 0.117908604 | -4.870566143  | 1.11279E-06 | 8.42011E-05 | gys1                | ZDB-GENE-040426-1243 | gys1              |
| ENSDARG00000045886 | 457.1720475 | -0.635283993 | 0.130518434 | -4.867389038  | 1.13082E-06 | 8.52061E-05 | slc38a2             | ZDB-GENE-030131-9659 | slc38a2           |
| ENSDARG00000090072 | 109.9263968 | 0.64552779   | 0.132764481 | 4.8622025     | 1.16087E-06 | 8.70417E-05 | CU462878.1          |                      |                   |
| ENSDARG00000061081 | 116.0475529 | -0.914828777 | 0.188177612 | -4.861517634  | 1.16489E-06 | 8.70417E-05 | arpp21              | ZDB-GENE-081104-296  | arpp21            |
| ENSDARG00000105214 | 95.15185195 | -0.621045193 | 0.127806061 | -4.859278113  | 1.17815E-06 | 8.76667E-05 | agtpbp1             | ZDB-GENE-081104-267  | agtpbp1           |
| ENSDARG00000056986 | 40.59267571 | 1.029193805  | 0.212076223 | 4.852942925   | 1.21643E-06 | 9.01413E-05 | dact2               | ZDB-GENE-030131-9975 | dact2             |

|                    |             |              |             |              |             |             |                   |                      |                   |
|--------------------|-------------|--------------|-------------|--------------|-------------|-------------|-------------------|----------------------|-------------------|
| ENSDARG0000033501  | 8.08042004  | -1.706488926 | 0.351726259 | -4.851752988 | 1.22375E-06 | 9.03107E-05 | zgc:64189         | ZDB-GENE-040426-1397 | zgc:64189         |
| ENSDARG0000017180  | 298.0362864 | -0.507436304 | 0.104696938 | -4.846715783 | 1.25522E-06 | 9.22536E-05 | npc1              | ZDB-GENE-030131-3161 | npc1              |
| ENSDARG0000097613  | 37.21749671 | -1.66970297  | 0.344890164 | -4.841260049 | 1.29018E-06 | 9.44362E-05 | igfn1.3           | ZDB-GENE-131122-44   | igfn1.3           |
| ENSDARG0000076238  | 92.1028028  | 0.676825092  | 0.139833061 | 4.840236542  | 1.29685E-06 | 9.44761E-05 | gramd1c           | ZDB-GENE-050506-88   | gramd1c           |
| ENSDARG0000008310  | 118.5000613 | -0.538996364 | 0.1113173   | -4.839560419 | 1.30127E-06 | 9.44761E-05 | ip6k2a            | ZDB-GENE-030131-760  | ip6k2a            |
| ENSDARG0000052900  | 8.037847019 | 2.967400452  | 0.614738704 | 4.827092282  | 1.38541E-06 | 0.00010018  | zgc:153642        | ZDB-GENE-061013-527  | zgc:153642        |
| ENSDARG0000075017  | 61.13548985 | -0.949037596 | 0.19677956  | -4.822846418 | 1.41524E-06 | 0.000101926 | myzap             | ZDB-GENE-041111-91   | myzap             |
| ENSDARG0000025788  | 98.63654305 | 0.654826058  | 0.135828195 | 4.82098771   | 1.42849E-06 | 0.000102469 | chp2              | ZDB-GENE-030131-5810 | chp2              |
| ENSDARG0000099902  | 39.12955985 | -0.933598216 | 0.193818747 | -4.816862299 | 1.45833E-06 | 0.000104025 | il17rc            | ZDB-GENE-120111-3    | il17rc            |
| ENSDARG0000098821  | 58.83515802 | -0.759588642 | 0.157709166 | -4.816388668 | 1.4618E-06  | 0.000104025 | sec1411           | ZDB-GENE-040426-801  | sec1411           |
| ENSDARG0000020086  | 28.33893851 | -0.976767993 | 0.202916971 | -4.813633822 | 1.4821E-06  | 0.000104723 | nuak1a            | ZDB-GENE-041210-122  | nuak1a            |
| ENSDARG00000103991 | 142.7446227 | -0.642239017 | 0.133425245 | -4.813474512 | 1.48329E-06 | 0.000104723 | sec1411           | ZDB-GENE-040426-801  | sec1411           |
| ENSDARG0000040926  | 92.94232742 | 0.714091492  | 0.148481089 | 4.809309379  | 1.51453E-06 | 0.000106487 | nr2f2             | ZDB-GENE-990415-252  | nr2f2             |
| ENSDARG0000098995  | 4.287204823 | -4.549121664 | 0.946044536 | -4.808570305 | 1.52014E-06 | 0.000106487 | cyp2k6            | ZDB-GENE-040426-1571 | cyp2k6            |
| ENSDARG0000023062  | 126.1387418 | -0.821243724 | 0.170831557 | -4.807330319 | 1.52959E-06 | 0.000106732 | ccn1              | ZDB-GENE-040426-3    | ccn1              |
| ENSDARG00000115257 | 18.9305605  | 1.778387464  | 0.370458156 | 4.800508335  | 1.58263E-06 | 0.000109669 | si:ch73-338o16.4  | ZDB-GENE-131119-14   | si:ch73-338o16.4  |
| ENSDARG0000038639  | 20.44349338 | -2.107427823 | 0.439015757 | -4.800346657 | 1.58391E-06 | 0.000109669 | elovl6l           | ZDB-GENE-031110-3    | elovl6l           |
| ENSDARG0000029443  | 74.64110634 | -0.798507288 | 0.166549253 | -4.794421314 | 1.63145E-06 | 0.000112526 | zgc:92242         | ZDB-GENE-040718-371  | zgc:92242         |
| ENSDARG0000046053  | 62.50326774 | -1.634527377 | 0.341800278 | -4.782112492 | 1.73463E-06 | 0.000119184 | slc27a6           | ZDB-GENE-060825-27   | slc27a6           |
| ENSDARG0000044601  | 1236.869207 | -0.406241071 | 0.085328195 | -4.760924239 | 1.92708E-06 | 0.000131902 | rtn4a             | ZDB-GENE-030710-1    | rtn4a             |
| ENSDARG0000053853  | 2455.738839 | -1.14370839  | 0.240484728 | -4.755846239 | 1.97617E-06 | 0.000134748 | slc13a2           | ZDB-GENE-040426-2389 | slc13a2           |
| ENSDARG0000016048  | 99.47624483 | -0.654798529 | 0.137934673 | -4.74716412  | 2.06289E-06 | 0.000140128 | gpat3             | ZDB-GENE-040718-436  | gpat3             |
| ENSDARG0000036482  | 130.4677332 | 0.493109064  | 0.104358141 | 4.725161459  | 2.29933E-06 | 0.000155599 | hexim1            | ZDB-GENE-030131-4637 | hexim1            |
| ENSDARG0000030530  | 582.4531247 | -0.650661257 | 0.13780265  | -4.721688988 | 2.33894E-06 | 0.000157685 | slc22a2           | ZDB-GENE-040426-2167 | slc22a2           |
| ENSDARG0000096280  | 12.06373158 | 1.901177061  | 0.403892219 | 4.707139605  | 2.51217E-06 | 0.000168729 | ighz              | ZDB-GENE-040513-8    | ighz              |
| ENSDARG0000022280  | 300.5854786 | 0.380403412  | 0.080880237 | 4.703292483  | 2.55999E-06 | 0.0001713   | brd2a             | ZDB-GENE-990415-248  | brd2a             |
| ENSDARG0000023151  | 8015.287487 | -0.852778259 | 0.18138601  | -4.701455527 | 2.58314E-06 | 0.000172206 | ucp1              | ZDB-GENE-010503-1    | ucp1              |
| ENSDARG0000056379  | 45.52426318 | -0.766235003 | 0.163010034 | -4.700538882 | 2.59476E-06 | 0.00017234  | si:ch73-86n18.1   | ZDB-GENE-141216-19   | si:ch73-86n18.1   |
| ENSDARG00000100972 | 63.12531367 | 1.152053143  | 0.246103991 | 4.68116401   | 2.85251E-06 | 0.00018876  | myh11b            | ZDB-GENE-101124-2    | myh11b            |
| ENSDARG0000038199  | 86.90061263 | -1.369650323 | 0.292981179 | -4.674874771 | 2.94133E-06 | 0.000193255 | cdab              | ZDB-GENE-040426-1911 | cdab              |
| ENSDARG00000112959 | 360.547733  | -0.848351801 | 0.181472248 | -4.674829404 | 2.94198E-06 | 0.000193255 | CABZ01072309.1    |                      |                   |
| ENSDARG0000053459  | 68.1157348  | 0.673884734  | 0.144284628 | 4.670523426  | 3.00433E-06 | 0.00019663  | rybbp             | ZDB-GENE-061103-96   | rybbp             |
| ENSDARG0000013522  | 2580.434149 | -1.831562784 | 0.392517262 | -4.666196775 | 3.06826E-06 | 0.00020002  | pck1              | ZDB-GENE-030909-11   | pck1              |
| ENSDARG0000031664  | 13.58565664 | 1.886118614  | 0.404267927 | 4.665516323  | 3.07843E-06 | 0.00020002  | sox21a            | ZDB-GENE-990715-6    | sox21a            |
| ENSDARG00000106212 | 45.93512782 | -1.464019265 | 0.313894698 | -4.664045851 | 3.10052E-06 | 0.000200728 | LO017965.1        |                      |                   |
| ENSDARG0000055642  | 34.63474836 | -0.992598035 | 0.213136032 | -4.657110418 | 3.20678E-06 | 0.000206861 | si:ch211-217a12.1 | ZDB-GENE-121214-95   | si:ch211-217a12.1 |
| ENSDARG0000093704  | 4.751079804 | 14.93690451  | 3.214169905 | 4.647204395  | 3.36464E-06 | 0.000216265 | si:dkeyp-46h3.8   | ZDB-GENE-060503-183  | si:dkeyp-46h3.8   |
| ENSDARG0000070047  | 135.6472233 | 0.650220695  | 0.140010399 | 4.644088573  | 3.41581E-06 | 0.00021877  | rgs4              | ZDB-GENE-030131-9839 | rgs4              |
| ENSDARG0000012355  | 66.89634455 | 0.982305325  | 0.211658844 | 4.640984073  | 3.46754E-06 | 0.000221293 | galnt8a.1         | ZDB-GENE-091015-4    | galnt8a.1         |
| ENSDARG0000037533  | 1384.189644 | 1.061168193  | 0.229293278 | 4.627995204  | 3.69223E-06 | 0.000234331 | mep1b             | ZDB-GENE-041014-209  | mep1b             |
| ENSDARG0000095040  | 131.7993832 | 1.865315446  | 0.403078458 | 4.627673375  | 3.69797E-06 | 0.000234331 | cbln7             | ZDB-GENE-070912-655  | cbln7             |
| ENSDARG0000054534  | 159.2820626 | 1.05579008   | 0.228547644 | 4.619562291  | 3.8455E-06  | 0.000242822 | ACOT12            |                      |                   |
| ENSDARG0000023176  | 338.43088   | -1.328130171 | 0.287897078 | -4.613211707 | 3.96494E-06 | 0.000248623 | tdo2b             | ZDB-GENE-030131-6014 | tdo2b             |
| ENSDARG0000016011  | 526.7834959 | -0.641767308 | 0.139115339 | -4.613203045 | 3.96511E-06 | 0.000248623 | gpccpd1           | ZDB-GENE-060503-472  | gpccpd1           |
| ENSDARG0000055395  | 30.12858386 | 1.054762895  | 0.228767631 | 4.610629958  | 4.01451E-06 | 0.000250844 | foxq1b            | ZDB-GENE-040426-2090 | foxq1b            |
| ENSDARG0000018921  | 32.75222668 | -0.956586161 | 0.207582693 | -4.608217328 | 4.06136E-06 | 0.00025289  | fam84a            | ZDB-GENE-040426-1247 | fam84a            |
| ENSDARG0000011797  | 59.74324137 | -0.691247616 | 0.15004323  | -4.606989694 | 4.0854E-06  | 0.000253507 | tent5bb           | ZDB-GENE-060503-431  | tent5bb           |
| ENSDARG0000099819  | 616.3743753 | -0.777325426 | 0.169111749 | -4.596519337 | 4.29607E-06 | 0.00026566  | sb:cb1058         | ZDB-GENE-040108-9    | sb:cb1058         |
| ENSDARG0000077709  | 65.39466259 | -0.684790037 | 0.149289861 | -4.586982895 | 4.49698E-06 | 0.000277128 | iqsec2b           | ZDB-GENE-081105-73   | iqsec2b           |

|                    |             |              |             |              |             |             |                  |                      |                  |
|--------------------|-------------|--------------|-------------|--------------|-------------|-------------|------------------|----------------------|------------------|
| ENSDARG0000059423  | 82.08825674 | 0.608744828  | 0.132748622 | 4.585696024  | 4.52477E-06 | 0.000277886 | prune2           | ZDB-GENE-050309-222  | prune2           |
| ENSDARG0000007080  | 56.1957861  | -0.845398038 | 0.184516479 | -4.581693953 | 4.61225E-06 | 0.000282291 | rhcg1            | ZDB-GENE-060209-2    | rhcg1            |
| ENSDARG0000043457  | 8660.890259 | -0.568248351 | 0.124306351 | -4.571354123 | 4.84583E-06 | 0.000295579 | gapdh            | ZDB-GENE-030115-1    | gapdh            |
| ENSDARG0000034503  | 232.8437607 | -1.267409826 | 0.277368444 | -4.569408868 | 4.89102E-06 | 0.000297324 | per2             | ZDB-GENE-011220-2    | per2             |
| ENSDARG00000063370 | 260.8676904 | 0.604232007  | 0.132430748 | 4.562626241  | 5.05177E-06 | 0.000306059 | sgk2a            | ZDB-GENE-030131-9632 | sgk2a            |
| ENSDARG0000007184  | 36.17916022 | -1.545198862 | 0.339965067 | -4.545169522 | 5.48911E-06 | 0.000331435 | zbtb16a          | ZDB-GENE-030131-1989 | zbtb16a          |
| ENSDARG0000093844  | 4462.054517 | -1.460630698 | 0.321589728 | -4.54190719  | 5.57476E-06 | 0.000335477 | zgc:136461       | ZDB-GENE-060519-7    | zgc:136461       |
| ENSDARG00000077301 | 197.3617269 | -0.809688146 | 0.178714491 | -4.530623916 | 5.88097E-06 | 0.000352721 | mlf1             | ZDB-GENE-080917-7    | mlf1             |
| ENSDARG00000061714 | 99.1215509  | 0.771989516  | 0.170432457 | 4.529592135  | 5.90977E-06 | 0.000353266 | si:dkey-45k15.1  | ZDB-GENE-081107-67   | si:dkey-45k15.1  |
| ENSDARG00000103980 | 115.5619795 | -0.825499781 | 0.182414992 | -4.525394383 | 6.0283E-06  | 0.000358949 | ets2             | ZDB-GENE-050522-552  | ets2             |
| ENSDARG00000071259 | 211.8182682 | -0.337353529 | 0.074556331 | -4.524813965 | 6.04487E-06 | 0.000358949 | fbxo34           | ZDB-GENE-030131-2194 | fbxo34           |
| ENSDARG00000038106 | 119.5873487 | -0.529971268 | 0.117198528 | -4.521995929 | 6.12592E-06 | 0.000362562 | slc37a4a         | ZDB-GENE-040426-2230 | slc37a4a         |
| ENSDARG00000020107 | 275.5785965 | -0.563974323 | 0.124800393 | -4.519010773 | 6.21292E-06 | 0.000366159 | usp2a            | ZDB-GENE-041212-59   | usp2a            |
| ENSDARG00000061858 | 792.9546191 | -0.954427636 | 0.211226034 | -4.518513274 | 6.22754E-06 | 0.000366159 | zgc:153968       | ZDB-GENE-061027-211  | zgc:153968       |
| ENSDARG00000111240 | 19.64636802 | -1.914965316 | 0.424479421 | -4.511326633 | 6.44234E-06 | 0.000377551 | dhrs13a.2        | ZDB-GENE-040912-69   | dhrs13a.2        |
| ENSDARG00000113928 | 5.981808757 | -1.510355427 | 0.335044481 | -4.507925109 | 6.54647E-06 | 0.000382403 | B3GAT1           |                      |                  |
| ENSDARG00000029497 | 46.63571565 | -1.384775805 | 0.307470363 | -4.50377003  | 6.67584E-06 | 0.000388695 | tfcp2l1          | ZDB-GENE-040704-58   | tfcp2l1          |
| ENSDARG00000078313 | 160.8458184 | 0.487311851  | 0.108239678 | 4.502155408  | 6.72678E-06 | 0.000390392 | MYO9B            | ZDB-GENE-110411-111  | si:zfos-588f8.1  |
| ENSDARG00000037781 | 162.1277429 | 0.42319191   | 0.094032062 | 4.500506549  | 6.77917E-06 | 0.000391967 | acss2            | ZDB-GENE-040718-388  | acss2            |
| ENSDARG00000060805 | 140.4114568 | 0.535342167  | 0.118966811 | 4.49992871   | 6.79763E-06 | 0.000391967 | map1sa           | ZDB-GENE-030131-3982 | map1sa           |
| ENSDARG00000043323 | 71.9522898  | -0.609744386 | 0.135532984 | -4.498863443 | 6.83177E-06 | 0.000392674 | lnx1             | ZDB-GENE-030131-9439 | lnx1             |
| ENSDARG00000054848 | 129.9964219 | -0.889195852 | 0.197758412 | -4.496374349 | 6.9122E-06  | 0.000396027 | pdk4             | ZDB-GENE-060503-754  | pdk4             |
| ENSDARG00000052923 | 30.12429813 | 0.976356806  | 0.217231962 | 4.494535689  | 6.97219E-06 | 0.000396952 | zgc:113162       | ZDB-GENE-050522-530  | zgc:113162       |
| ENSDARG00000052244 | 402.8425494 | 0.318383095  | 0.070840917 | 4.494338981  | 6.97864E-06 | 0.000396952 | zgc:158564       | ZDB-GENE-070112-1662 | zgc:158564       |
| ENSDARG00000057352 | 30.60478262 | -0.926827782 | 0.206243678 | -4.493848215 | 6.99475E-06 | 0.000396952 | slc25a29         | ZDB-GENE-050913-70   | slc25a29         |
| ENSDARG00000069006 | 123.3066834 | 0.630080549  | 0.140454157 | 4.486022784  | 7.2565E-06  | 0.000410507 | tle3b            | ZDB-GENE-990415-85   | tle3b            |
| ENSDARG00000045695 | 50.49081277 | 0.800486765  | 0.178570206 | 4.482756578  | 7.3685E-06  | 0.000415532 | myca             | ZDB-GENE-990415-162  | myca             |
| ENSDARG00000109626 | 24.11569778 | -1.306001924 | 0.291579848 | -4.479054141 | 7.49745E-06 | 0.000420979 | si:ch211-226h7.3 | ZDB-GENE-130531-9    | si:ch211-226h7.3 |
| ENSDARG00000101749 | 211.071462  | 0.77902844   | 0.173943111 | 4.478639227  | 7.51204E-06 | 0.000420979 | zgc:92161        | ZDB-GENE-040912-22   | zgc:92161        |
| ENSDARG00000004745 | 93.97652074 | -0.667495094 | 0.149067124 | -4.477815594 | 7.54107E-06 | 0.00042129  | lmbr1l           | ZDB-GENE-030131-9906 | lmbr1l           |
| ENSDARG00000102335 | 45.75827611 | -1.004873348 | 0.224866006 | -4.468765046 | 7.86725E-06 | 0.000437989 | ano1             | ZDB-GENE-121127-3    | ano1             |
| ENSDARG00000021991 | 602.3843971 | 0.437225999  | 0.097853285 | 4.468179041  | 7.88883E-06 | 0.000437989 | erlin1           | ZDB-GENE-050327-13   | erlin1           |
| ENSDARG00000069498 | 13.38539347 | -1.141275426 | 0.255538285 | -4.466162192 | 7.96352E-06 | 0.000438885 | phkg1b           | ZDB-GENE-050522-52   | phkg1b           |
| ENSDARG00000044251 | 56.67031596 | -0.594870248 | 0.133205286 | -4.465815617 | 7.97643E-06 | 0.000438885 | rasgef1bb        | ZDB-GENE-040801-220  | rasgef1bb        |
| ENSDARG00000069946 | 300.5415561 | -0.750268329 | 0.168004522 | -4.465762715 | 7.9784E-06  | 0.000438885 | itga6b           | ZDB-GENE-050320-5    | itga6b           |
| ENSDARG00000092680 | 42.33596863 | 0.961346569  | 0.215583217 | 4.459282984  | 8.22343E-06 | 0.000450981 | si:dkey-58f10.12 | ZDB-GENE-060526-314  | si:dkey-58f10.12 |
| ENSDARG00000059507 | 23.6779285  | 0.78246888   | 0.17559784  | 4.456027944  | 8.34922E-06 | 0.000456483 | si:dkey-163m14.2 | ZDB-GENE-120215-47   | si:dkey-163m14.2 |
| ENSDARG00000053858 | 317.7296587 | -0.639164999 | 0.143476008 | -4.454856311 | 8.39494E-06 | 0.000457588 | crip1            | ZDB-GENE-041111-1    | crip1            |
| ENSDARG00000012390 | 10.04868456 | -1.276530575 | 0.286871636 | -4.449831969 | 8.59375E-06 | 0.000467005 | kcnk5b           | ZDB-GENE-040426-1297 | kcnk5b           |
| ENSDARG00000004187 | 4.014290053 | -2.172212383 | 0.488301349 | -4.448507847 | 8.64689E-06 | 0.00046784  | zgc:122979       | ZDB-GENE-051127-45   | zgc:122979       |
| ENSDARG00000062058 | 152.6113647 | -0.596005744 | 0.133995021 | -4.447969328 | 8.66859E-06 | 0.00046784  | slc12a7b         | ZDB-GENE-030829-61   | slc12a7b         |
| ENSDARG00000053479 | 22.40783839 | 1.043984187  | 0.234765317 | 4.446926837  | 8.71075E-06 | 0.00046784  | gdf6a            | ZDB-GENE-980526-373  | gdf6a            |
| ENSDARG00000102082 | 98.59800528 | 0.840460218  | 0.189000831 | 4.446859911  | 8.71346E-06 | 0.00046784  | nr3c2            | ZDB-GENE-060531-23   | nr3c2            |
| ENSDARG00000103154 | 61.65127734 | 1.006419659  | 0.226369213 | 4.445921087  | 8.75161E-06 | 0.000468485 | si:ch73-144l3.1  | ZDB-GENE-131119-96   | si:ch73-144l3.1  |
| ENSDARG00000023082 | 78.51369721 | -1.579441374 | 0.356073625 | -4.435715708 | 9.17669E-06 | 0.000488864 | krt1-19d         | ZDB-GENE-060316-1    | krt1-19d         |
| ENSDARG00000058494 | 160.144847  | -0.473424764 | 0.106735907 | -4.43547796  | 9.18682E-06 | 0.000488864 | dnaja3a          | ZDB-GENE-030131-7837 | dnaja3a          |
| ENSDARG00000070774 | 26.76577945 | 1.194837076  | 0.270401278 | 4.418755289  | 9.9271E-06  | 0.000526694 | irgf1            | ZDB-GENE-051212-5    | irgf1            |
| ENSDARG00000061952 | 167.3007391 | -0.449183679 | 0.101785885 | -4.413025231 | 1.01936E-05 | 0.000539239 | ecpas            | ZDB-GENE-061207-66   | ecpas            |
| ENSDARG00000100738 | 8.615721852 | -1.609528844 | 0.364881161 | -4.411104266 | 1.02845E-05 | 0.000542446 | osmr             | ZDB-GENE-060526-48   | osmr             |

|                    |             |              |             |              |             |             |                   |                      |                   |
|--------------------|-------------|--------------|-------------|--------------|-------------|-------------|-------------------|----------------------|-------------------|
| ENSDARG00000076533 | 103.9223739 | 0.56341583   | 0.127751315 | 4.410254626  | 1.03249E-05 | 0.000542981 | nfe2l1b           | ZDB-GENE-120319-2    | nfe2l1b           |
| ENSDARG00000041715 | 19.89667064 | -1.266191351 | 0.287223392 | -4.408385205 | 1.04144E-05 | 0.000546087 | bco2b             | ZDB-GENE-060421-7448 | bco2b             |
| ENSDARG00000029795 | 111.2818568 | 0.596970408  | 0.135456063 | 4.40711471   | 1.04757E-05 | 0.000547446 | prxl2b            | ZDB-GENE-040426-2556 | prxl2b            |
| ENSDARG00000044094 | 355.4338067 | 0.660131813  | 0.149805814 | 4.406583401  | 1.05014E-05 | 0.000547446 | gfpt2             | ZDB-GENE-071113-1    | gfpt2             |
| ENSDARG00000062390 | 114.7583094 | 0.434573532  | 0.098652133 | 4.405110368  | 1.0573E-05  | 0.000549582 | cdc42ep5          | ZDB-GENE-030131-5813 | cdc42ep5          |
| ENSDARG00000008363 | 185.2923196 | -0.586352207 | 0.133766041 | -4.383416023 | 1.16833E-05 | 0.000605538 | mcl1b             | ZDB-GENE-030825-1    | mcl1b             |
| ENSDARG00000088762 | 7.59543125  | -1.88897702  | 0.432944608 | -4.363091685 | 1.28237E-05 | 0.000662731 | si:ch211-224 10.4 | ZDB-GENE-090312-125  | si:ch211-224 10.4 |
| ENSDARG00000079175 | 272.8376515 | 0.737981106  | 0.169542387 | 4.352782339  | 1.34421E-05 | 0.000692691 | si:ch211-79k12.1  | ZDB-GENE-080303-9    | si:ch211-79k12.1  |
| ENSDARG00000067796 | 157.598912  | -0.459837377 | 0.10570691  | -4.350116541 | 1.36065E-05 | 0.000699157 | clpxb             | ZDB-GENE-130404-1    | clpxb             |
| ENSDARG00000038561 | 7.006851844 | -1.56687399  | 0.360449114 | -4.347004691 | 1.38009E-05 | 0.00070712  | klf6b             | ZDB-GENE-070912-633  | klf6b             |
| ENSDARG00000003383 | 40.12947955 | -0.647419768 | 0.148963351 | -4.346168124 | 1.38536E-05 | 0.000707799 | asb8              | ZDB-GENE-030131-5411 | asb8              |
| ENSDARG00000103277 | 322.7669965 | -2.633894144 | 0.606587448 | -4.342150754 | 1.41095E-05 | 0.000718821 | cyp24a1           | ZDB-GENE-060825-1    | cyp24a1           |
| ENSDARG00000017386 | 33.42613026 | -0.995635233 | 0.229838597 | -4.331888742 | 1.47836E-05 | 0.00075103  | sobpb             | ZDB-GENE-041210-8    | sobpb             |
| ENSDARG00000061896 | 168.2407073 | -0.927968814 | 0.214860055 | -4.318945253 | 1.56777E-05 | 0.000794202 | slco2a1           | ZDB-GENE-060606-3    | slco2a1           |
| ENSDARG00000017388 | 194.9213588 | 0.71337216   | 0.165782775 | 4.303053563  | 1.6846E-05  | 0.000850985 | gstt1b            | ZDB-GENE-040426-1491 | gstt1b            |
| ENSDARG00000006010 | 40.32872422 | 0.647158066  | 0.150630917 | 4.29631632   | 1.7366E-05  | 0.000874787 | bmi1a             | ZDB-GENE-030131-224  | bmi1a             |
| ENSDARG00000055331 | 13.85670354 | 1.639743389  | 0.381986388 | 4.292674927  | 1.76533E-05 | 0.00088441  | aldh9a1a.2        | ZDB-GENE-081104-507  | aldh9a1a.2        |
| ENSDARG00000078178 | 152.2771604 | 0.907193535  | 0.211336684 | 4.292645828  | 1.76557E-05 | 0.00088441  | art4              | ZDB-GENE-070725-5    | art4              |
| ENSDARG00000060196 | 45.09951733 | -0.689194258 | 0.160613908 | -4.290999857 | 1.7787E-05  | 0.00088851  | lhpp              | ZDB-GENE-070615-43   | lhpp              |
| ENSDARG00000040427 | 66.61956517 | 1.518777454  | 0.354105519 | 4.289053325  | 1.79436E-05 | 0.000893842 | acot19            | ZDB-GENE-041114-124  | acot19            |
| ENSDARG00000089043 | 139.0257451 | 0.56555613   | 0.132077637 | 4.281997628  | 1.85223E-05 | 0.000920112 | ptpn6             | ZDB-GENE-030131-7513 | ptpn6             |
| ENSDARG00000013024 | 86.30479748 | 0.480184437  | 0.112211516 | 4.279279479  | 1.87499E-05 | 0.000928847 | erap1a            | ZDB-GENE-091113-7    | erap1a            |
| ENSDARG00000028725 | 34.31022666 | -0.918800264 | 0.215090572 | -4.271690083 | 1.93997E-05 | 0.000958388 | adra1aa           | ZDB-GENE-030131-2831 | adra1aa           |
| ENSDARG00000014554 | 311.5419292 | 0.750557879  | 0.175880814 | 4.267423273  | 1.97744E-05 | 0.000974214 | ppp1r3cb          | ZDB-GENE-040426-1733 | ppp1r3cb          |
| ENSDARG00000054543 | 19.06644251 | 1.325728484  | 0.310962216 | 4.263310512  | 2.0142E-05  | 0.000989608 | samsn1a           | ZDB-GENE-030131-8639 | samsn1a           |
| ENSDARG00000032708 | 23.94890379 | -0.85807669  | 0.201311216 | -4.262438556 | 2.02208E-05 | 0.000990764 | arl4cb            | ZDB-GENE-040426-2382 | arl4cb            |
| ENSDARG00000022952 | 72.67166366 | 0.565530439  | 0.13270741  | 4.261483505  | 2.03074E-05 | 0.000992298 | zgc:66448         | ZDB-GENE-030131-5612 | zgc:66448         |
| ENSDARG00000007869 | 65.70277949 | -0.603791605 | 0.14173831  | -4.259904075 | 2.04515E-05 | 0.000996621 | ehd3              | ZDB-GENE-041014-352  | ehd3              |
| ENSDARG00000102403 | 234.0690199 | -0.495563881 | 0.116384009 | -4.258006637 | 2.06258E-05 | 0.001002391 | cry2              | ZDB-GENE-010426-6    | cry2              |
| ENSDARG00000015449 | 169.6173559 | 0.421468684  | 0.099073896 | 4.254084103  | 2.09906E-05 | 0.001017365 | fut8a             | ZDB-GENE-031118-20   | fut8a             |
| ENSDARG00000019360 | 610.6562594 | -0.499022366 | 0.117538089 | -4.245622584 | 2.17987E-05 | 0.001053684 | sec23b            | ZDB-GENE-030131-5479 | sec23b            |
| ENSDARG00000102362 | 174.7170902 | -0.47518492  | 0.112006264 | -4.242485223 | 2.21058E-05 | 0.001065655 | slc25a12          | ZDB-GENE-031006-11   | slc25a12          |
| ENSDARG00000054271 | 70.44021575 | -0.525695449 | 0.123995473 | -4.23963419  | 2.23884E-05 | 0.001076385 | cdkn1bb           | ZDB-GENE-030521-13   | cdkn1bb           |
| ENSDARG00000068883 | 401.6755982 | 0.718135999  | 0.169431983 | 4.238491378  | 2.25027E-05 | 0.001078986 | tspan13a          | ZDB-GENE-040718-19   | tspan13a          |
| ENSDARG00000068006 | 27.10367114 | 2.452407684  | 0.578731967 | 4.237553516  | 2.25969E-05 | 0.001080612 | gck               | ZDB-GENE-060825-204  | gck               |
| ENSDARG00000077326 | 207.7107366 | 0.580185188  | 0.13745998  | 4.220757102  | 2.43483E-05 | 0.001161272 | slc45a4           | ZDB-GENE-091230-5    | slc45a4           |
| ENSDARG00000069190 | 13.50531559 | 1.172768655  | 0.277913868 | 4.21989973   | 2.44411E-05 | 0.001161799 | zgc:172339        | ZDB-GENE-080204-115  | zgc:172339        |
| ENSDARG00000040907 | 36.12543091 | -1.15566417  | 0.27388918  | -4.219459015 | 2.44889E-05 | 0.001161799 | grgb              | ZDB-GENE-040712-2    | grgb              |
| ENSDARG00000070353 | 9.859538054 | 1.244948874  | 0.295143554 | 4.218113036  | 2.46355E-05 | 0.00116567  | hoxc13a           | ZDB-GENE-000822-4    | hoxc13a           |
| ENSDARG00000077875 | 145.6146329 | 1.056449002  | 0.250805929 | 4.212217016  | 2.52876E-05 | 0.001193377 | slc2a5            | ZDB-GENE-060222-2    | slc2a5            |
| ENSDARG00000009087 | 810.3090398 | 0.62272712   | 0.147906489 | 4.210275869  | 2.55059E-05 | 0.001200518 | cd74a             | ZDB-GENE-000901-1    | cd74a             |
| ENSDARG00000027611 | 169.1033194 | -0.503344281 | 0.119626645 | -4.207626835 | 2.58067E-05 | 0.001211494 | cavin2a           | ZDB-GENE-090313-215  | cavin2a           |
| ENSDARG00000037998 | 348.7839763 | 0.275598391  | 0.065530828 | 4.205629651  | 2.60356E-05 | 0.001217736 | flot1b            | ZDB-GENE-020430-2    | flot1b            |
| ENSDARG00000013775 | 66.52026203 | -0.81973552  | 0.194929869 | -4.20528431  | 2.60754E-05 | 0.001217736 | si:dkey-246g23.4  | ZDB-GENE-050419-234  | si:dkey-246g23.4  |
| ENSDARG00000093024 | 190.8380221 | 0.651325698  | 0.154978713 | 4.202678457  | 2.63775E-05 | 0.001228644 | si:ch211-213a13.2 | ZDB-GENE-050208-551  | si:ch211-213a13.2 |
| ENSDARG00000012684 | 603.3033369 | 0.664426573  | 0.15815068  | 4.20122488   | 2.65475E-05 | 0.001233357 | atp2b1a           | ZDB-GENE-030925-29   | atp2b1a           |
| ENSDARG00000091902 | 116.5735752 | -0.552381168 | 0.131542342 | -4.199265113 | 2.67783E-05 | 0.001240865 | b3gnt2b           | ZDB-GENE-050913-158  | b3gnt2b           |
| ENSDARG00000075833 | 9.04494649  | -1.800470713 | 0.429166943 | -4.19526886  | 2.72548E-05 | 0.001252288 | lyve1a            | ZDB-GENE-031118-138  | lyve1a            |
| ENSDARG00000060435 | 17.50891289 | -1.054309839 | 0.251318213 | -4.19511912  | 2.72728E-05 | 0.001252288 | bnip1             | ZDB-GENE-060503-81   | bnip1             |



|                    |             |              |             |              |             |             |                   |                      |                   |
|--------------------|-------------|--------------|-------------|--------------|-------------|-------------|-------------------|----------------------|-------------------|
| ENSDARG00000074546 | 180.7165784 | 0.553088938  | 0.131845298 | 4.194984182  | 2.72891E-05 | 0.001252288 | si:ch211-213a13.2 | ZDB-GENE-050208-551  | si:ch211-213a13.2 |
| ENSDARG00000062618 | 55.06677614 | -0.721677925 | 0.172038649 | -4.194859296 | 2.73041E-05 | 0.001252288 | kcnj12b           | ZDB-GENE-091118-79   | kcnj12b           |
| ENSDARG00000069459 | 4.986634463 | -1.913513143 | 0.457590986 | -4.18171075  | 2.89324E-05 | 0.001323583 | si:dkey-6n21.13   | ZDB-GENE-160728-54   | si:dkey-6n21.13   |
| ENSDARG00000070844 | 4344.925202 | -0.662767625 | 0.158520722 | -4.180952598 | 2.9029E-05  | 0.001324625 | gamt              | ZDB-GENE-051030-97   | gamt              |
| ENSDARG00000058953 | 384.7915252 | -0.438240805 | 0.104883653 | -4.178351855 | 2.93629E-05 | 0.001333592 | abcc4             | ZDB-GENE-030616-511  | abcc4             |
| ENSDARG00000069478 | 54.23750455 | -0.824570785 | 0.197347703 | -4.178263908 | 2.93743E-05 | 0.001333592 | slc13a3           | ZDB-GENE-040426-2486 | slc13a3           |
| ENSDARG00000074771 | 60.18632202 | 0.622769758  | 0.149071334 | 4.177662729  | 2.9452E-05  | 0.001333744 | ifngr1            | ZDB-GENE-081022-158  | ifngr1            |
| ENSDARG00000095947 | 69.49622584 | -0.570354364 | 0.136591976 | -4.175606659 | 2.97193E-05 | 0.001342459 | adkb              | ZDB-GENE-030131-948  | adkb              |
| ENSDARG00000035601 | 42.50612471 | 1.062012082  | 0.254383521 | 4.174846228  | 2.98187E-05 | 0.001343566 | dao.3             | ZDB-GENE-040426-1894 | dao.3             |
| ENSDARG00000075369 | 68.10259394 | 0.48854291   | 0.117172276 | 4.169441168  | 3.05347E-05 | 0.00137238  | nck1b             | ZDB-GENE-090317-1    | nck1b             |
| ENSDARG00000036848 | 112.7729195 | -0.850819697 | 0.204101523 | -4.168610223 | 3.06463E-05 | 0.001373948 | slc43a2a          | ZDB-GENE-040426-964  | slc43a2a          |
| ENSDARG0000002988  | 66.98560687 | -1.044825329 | 0.250694458 | -4.167724077 | 3.07656E-05 | 0.001375859 | tnnt2d            | ZDB-GENE-050626-97   | tnnt2d            |
| ENSDARG00000020031 | 35.03199591 | -0.67481241  | 0.161971101 | -4.166251919 | 3.09649E-05 | 0.001381325 | cldn11a           | ZDB-GENE-040718-369  | cldn11a           |
| ENSDARG00000044691 | 97.6651015  | 1.038639954  | 0.249573638 | 4.161657298  | 3.15946E-05 | 0.001405922 | ppp1r3b           | ZDB-GENE-030131-5496 | ppp1r3b           |
| ENSDARG00000098742 | 8.39629881  | -1.682598261 | 0.405275679 | -4.15173756  | 3.29961E-05 | 0.001464649 | lrrtm1            | ZDB-GENE-161221-2    | lrrtm1            |
| ENSDARG00000028507 | 704.107608  | -0.65359179  | 0.15768528  | -4.14491315  | 3.39943E-05 | 0.001505232 | itgb4             | ZDB-GENE-030131-7209 | itgb4             |
| ENSDARG00000006514 | 57.95068299 | 0.627438751  | 0.151402645 | 4.144172994  | 3.41042E-05 | 0.001506382 | her6              | ZDB-GENE-980526-144  | her6              |
| ENSDARG00000045051 | 26.51522229 | -1.506411193 | 0.364367053 | -4.134323291 | 3.56002E-05 | 0.001568596 | slc16a3           | ZDB-GENE-030131-5487 | slc16a3           |
| ENSDARG00000012199 | 111.2853656 | -0.780520615 | 0.189015219 | -4.129406183 | 3.63701E-05 | 0.001596889 | gpt2              | ZDB-GENE-030729-8    | gpt2              |
| ENSDARG00000028431 | 95.50666689 | 0.457078467  | 0.110697187 | 4.12908838   | 3.64204E-05 | 0.001596889 | adnp2b            | ZDB-GENE-030131-5930 | adnp2b            |
| ENSDARG00000033355 | 66.17874308 | 1.073576486  | 0.260254689 | 4.125099495  | 3.70575E-05 | 0.001620857 | zgc:101699        | ZDB-GENE-041114-140  | zgc:101699        |
| ENSDARG00000041699 | 9.842091584 | -3.047908694 | 0.740598502 | -4.115466999 | 3.86396E-05 | 0.001685948 | piwil1            | ZDB-GENE-030813-2    | piwil1            |
| ENSDARG00000041959 | 51.59083009 | -0.938234781 | 0.228080091 | -4.11361981  | 3.89503E-05 | 0.001692933 | cxc4b             | ZDB-GENE-010614-1    | cxc4b             |
| ENSDARG00000005894 | 162.188521  | 0.746149442  | 0.11339328  | 4.11339328   | 3.89885E-05 | 0.001692933 | slc7a9            | ZDB-GENE-080116-2    | slc7a9            |
| ENSDARG00000035810 | 221.6558281 | -0.470424492 | 0.114789164 | -4.098161132 | 4.16445E-05 | 0.001803616 | rgcc              | ZDB-GENE-040704-31   | rgcc              |
| ENSDARG00000078567 | 194.5547317 | -0.736227134 | 0.179671099 | -4.097638057 | 4.17387E-05 | 0.001803616 | lonrf1l           | ZDB-GENE-081104-397  | lonrf1l           |
| ENSDARG00000034470 | 1706.75835  | -0.602494409 | 0.147104837 | -4.095680492 | 4.2093E-05  | 0.001813899 | aldoab            | ZDB-GENE-040426-2299 | aldoab            |
| ENSDARG00000052994 | 228.7311366 | -0.427660888 | 0.104429594 | -4.095207803 | 4.2179E-05  | 0.001813899 | slc25a28          | ZDB-GENE-040426-2125 | slc25a28          |
| ENSDARG00000076592 | 112.6757034 | -0.529408345 | 0.129305429 | -4.094246839 | 4.23543E-05 | 0.001814876 | man1b1b           | ZDB-GENE-070705-482  | man1b1b           |
| ENSDARG00000100149 | 85.26669563 | 0.516119157  | 0.126067997 | 4.093974432  | 4.24041E-05 | 0.001814876 | axin2             | ZDB-GENE-000403-2    | axin2             |
| ENSDARG00000093964 | 113.6790824 | 0.647541672  | 0.15833346  | 4.089733593  | 4.31869E-05 | 0.001843978 | si:ch211-250k18.6 | ZDB-GENE-070912-245  | si:ch211-250k18.6 |
| ENSDARG00000071005 | 100.020493  | -1.031622144 | 0.252994014 | -4.077654361 | 4.54923E-05 | 0.0019378   | ppp1r3ca          | ZDB-GENE-040718-70   | ppp1r3ca          |
| ENSDARG00000090873 | 4.313543804 | 2.743502874  | 0.672982602 | 4.076632686  | 4.56926E-05 | 0.001941718 | ccl34a.4          | ZDB-GENE-070912-32   | ccl34a.4          |
| ENSDARG00000032571 | 132.6613285 | 0.575926331  | 0.141303009 | 4.075824958  | 4.58515E-05 | 0.001943865 | il20ra            | ZDB-GENE-040724-249  | il20ra            |
| ENSDARG00000015890 | 153.5467796 | -0.775071671 | 0.190293942 | -4.073023353 | 4.64068E-05 | 0.001962766 | mafa              | ZDB-GENE-010605-2    | mafa              |
| ENSDARG00000103642 | 2103.626207 | 1.610473738  | 0.39590032  | 4.067876831  | 4.74434E-05 | 0.00200189  | pglyrp6           | ZDB-GENE-071227-2    | pglyrp6           |
| ENSDARG00000062085 | 290.5305536 | 0.870200672  | 0.214003455 | 4.066292623  | 4.7767E-05  | 0.002010809 | tkfc              | ZDB-GENE-060929-652  | tkfc              |
| ENSDARG00000033443 | 89.65560614 | -0.410108528 | 0.100944497 | -4.062713068 | 4.85056E-05 | 0.002029711 | mdm2              | ZDB-GENE-990415-153  | mdm2              |
| ENSDARG00000061762 | 25.11292903 | -0.919986144 | 0.226472347 | -4.062244935 | 4.8603E-05  | 0.002029711 | trim108           | ZDB-GENE-060503-670  | trim108           |
| ENSDARG00000024295 | 232.6705955 | -0.68266884  | 0.168054603 | -4.062184711 | 4.86156E-05 | 0.002029711 | slc11a2           | ZDB-GENE-021115-1    | slc11a2           |
| ENSDARG00000116618 | 39.71575871 | 0.696079575  | 0.171366714 | 4.061929874  | 4.86687E-05 | 0.002029711 | si:ch73-27e22.8   | ZDB-GENE-100917-4    | si:ch73-27e22.8   |
| ENSDARG00000042824 | 753.8200954 | 0.418739485  | 0.103175986 | 4.058497526  | 4.93895E-05 | 0.002054991 | nfe2l2a           | ZDB-GENE-030723-2    | nfe2l2a           |
| ENSDARG00000032206 | 161.7396735 | 0.718413941  | 0.177064719 | 4.057352283  | 4.96322E-05 | 0.00206031  | cthl              | ZDB-GENE-040905-3    | cthl              |
| ENSDARG00000033170 | 29.11207634 | -0.837526799 | 0.206593632 | -4.053981673 | 5.03532E-05 | 0.002085412 | sult2st1          | ZDB-GENE-030219-114  | sult2st1          |
| ENSDARG00000078425 | 356.4417681 | -0.805803905 | 0.19896424  | -4.049993624 | 5.1219E-05  | 0.002116384 | oat               | ZDB-GENE-110411-148  | oat               |
| ENSDARG00000097082 | 25.23437228 | -0.882754082 | 0.218022169 | -4.04891891  | 5.14548E-05 | 0.002121238 | im:7152348        | ZDB-GENE-041111-308  | im:7152348        |
| ENSDARG00000075397 | 51.26377758 | -0.6675817   | 0.164924551 | -4.047800619 | 5.17012E-05 | 0.002126507 | cipca             | ZDB-GENE-120928-5    | cipca             |
| ENSDARG00000078185 | 25.64244536 | -0.728495001 | 0.180257142 | -4.041421008 | 5.31283E-05 | 0.002180205 | pacs2             | ZDB-GENE-081218-1    | pacs2             |
| ENSDARG00000033845 | 66.27410513 | -0.848687817 | 0.21103273  | -4.021593324 | 5.78058E-05 | 0.002366738 | igsf9ba           | ZDB-GENE-060503-729  | igsf9ba           |

|                    |             |              |             |              |             |             |                   |                      |                   |
|--------------------|-------------|--------------|-------------|--------------|-------------|-------------|-------------------|----------------------|-------------------|
| ENSDARG0000042946  | 133.4456675 | 0.452269129  | 0.112684502 | 4.013587677  | 5.98028E-05 | 0.002442923 | hook1             | ZDB-GENE-041001-159  | hook1             |
| ENSDARG00000104129 | 10.54542637 | -1.318614458 | 0.328852085 | -4.009749429 | 6.07832E-05 | 0.00247733  | si:dkey-23n7.10   | ZDB-GENE-141222-64   | si:dkey-23n7.10   |
| ENSDARG00000108326 | 25.17792067 | -0.935892231 | 0.233519694 | -4.007765756 | 6.12959E-05 | 0.002490894 | LT631684.1        |                      |                   |
| ENSDARG0000005840  | 343.5433007 | -0.442615617 | 0.110449888 | -4.007388555 | 6.13938E-05 | 0.002490894 | got2b             | ZDB-GENE-030131-7917 | got2b             |
| ENSDARG00000094041 | 498.6125317 | -0.689732346 | 0.172988537 | -3.987156366 | 6.687E-05   | 0.00270695  | krt17             | ZDB-GENE-060503-86   | krt17             |
| ENSDARG0000069559  | 93.96355756 | -1.000128351 | 0.250932211 | -3.985651535 | 6.72952E-05 | 0.002717352 | muc13a            | ZDB-GENE-061207-26   | muc13a            |
| ENSDARG0000054906  | 57.63375135 | 0.530259798  | 0.133058043 | 3.985176578  | 6.743E-05   | 0.002717352 | ier5l             | ZDB-GENE-030131-5134 | ier5l             |
| ENSDARG0000054087  | 95.61600559 | -0.548043764 | 0.137548386 | -3.98437073  | 6.76592E-05 | 0.002720475 | irs1              | ZDB-GENE-030131-872  | irs1              |
| ENSDARG00000018485 | 73.00726489 | 0.529501414  | 0.132912817 | 3.983825091  | 6.78148E-05 | 0.002720632 | cyp2v1            | ZDB-GENE-040912-139  | cyp2v1            |
| ENSDARG0000000394  | 222.1949297 | 0.392246785  | 0.098485343 | 3.982793533  | 6.81099E-05 | 0.002726373 | matr3l1.1         | ZDB-GENE-030616-40   | matr3l1.1         |
| ENSDARG0000043281  | 59.00563034 | 0.810884745  | 0.20363352  | 3.982078916  | 6.83151E-05 | 0.002728495 | stap2b            | ZDB-GENE-040426-2540 | stap2b            |
| ENSDARG0000005690  | 45.60867783 | -0.820282666 | 0.206320894 | -3.975761488 | 7.01544E-05 | 0.002795731 | slc25a23a         | ZDB-GENE-121214-154  | slc25a23a         |
| ENSDARG00000098063 | 144.4911027 | 1.063721019  | 0.26764358  | 3.97439392   | 7.05587E-05 | 0.002805608 | alp3              | ZDB-GENE-120919-1    | alp3              |
| ENSDARG0000006308  | 28.620221   | 0.7464592    | 0.18790058  | 3.972628507  | 7.10839E-05 | 0.002820237 | ptpn18            | ZDB-GENE-050320-12   | ptpn18            |
| ENSDARG00000101164 | 12.35085099 | -1.919940594 | 0.483581769 | -3.970250155 | 7.17972E-05 | 0.00284225  | nansb             | ZDB-GENE-041114-125  | nansb             |
| ENSDARG00000088082 | 16.98874144 | 1.098248376  | 0.277247833 | 3.961251435  | 7.4558E-05  | 0.00294504  | si:ch211-214c20.1 | ZDB-GENE-081103-49   | si:ch211-214c20.1 |
| ENSDARG00000091592 | 33.32938653 | -1.03055014  | 0.260250243 | -3.959843146 | 7.4999E-05  | 0.00295595  | pel1a             | ZDB-GENE-110310-6    | pel1a             |
| ENSDARG00000075612 | 51.04969375 | -0.595830835 | 0.150494179 | -3.959162001 | 7.52132E-05 | 0.002957891 | ercc6             | ZDB-GENE-070228-1    | ercc6             |
| ENSDARG00000031336 | 88.17168821 | -0.681926405 | 0.172311512 | -3.957520869 | 7.57317E-05 | 0.002971764 | hsd20b2           | ZDB-GENE-030804-21   | hsd20b2           |
| ENSDARG00000102146 | 120.8441344 | -1.80766024  | 0.457725301 | -3.949225087 | 7.84046E-05 | 0.003069934 | si:ch211-69b7.6   | ZDB-GENE-141212-266  | si:ch211-69b7.6   |
| ENSDARG00000044356 | 113.8995464 | -0.653345757 | 0.165641647 | -3.944332657 | 8.00225E-05 | 0.003126457 | tp63              | ZDB-GENE-030819-1    | tp63              |
| ENSDARG00000016545 | 82.18082003 | -0.562803659 | 0.14272794  | -3.943191922 | 8.04043E-05 | 0.003134543 | zgc:154046        | ZDB-GENE-061103-289  | zgc:154046        |
| ENSDARG00000042620 | 1601.330862 | 0.465482346  | 0.118123517 | 3.940640774  | 8.12642E-05 | 0.003161197 | gstr              | ZDB-GENE-090507-1    | gstr              |
| ENSDARG00000034677 | 101.6277108 | -0.961963462 | 0.244519513 | -3.934096916 | 8.35101E-05 | 0.003241529 | scel              | ZDB-GENE-030616-15   | scel              |
| ENSDARG00000037941 | 6.545309914 | 1.490859768  | 0.37937681  | 3.929759883  | 8.50307E-05 | 0.003293426 | syt5a             | ZDB-GENE-040718-110  | syt5a             |
| ENSDARG00000045748 | 45.07945382 | -0.630875756 | 0.160613527 | -3.927911717 | 8.56867E-05 | 0.003307311 | stab2             | ZDB-GENE-041210-336  | stab2             |
| ENSDARG00000073988 | 75.10426342 | -0.616204405 | 0.156886381 | -3.92771126  | 8.57581E-05 | 0.003307311 | mntb              | ZDB-GENE-070820-8    | mntb              |
| ENSDARG00000070222 | 5.95676069  | -1.445375826 | 0.36848178  | -3.922516406 | 8.76289E-05 | 0.003368127 | fam43b            | ZDB-GENE-040912-11   | fam43b            |
| ENSDARG00000090793 | 83.21604408 | 0.70715505   | 0.180291289 | 3.922291831  | 8.77107E-05 | 0.003368127 | si:ch211-207j7.2  | ZDB-GENE-120215-232  | si:ch211-207j7.2  |
| ENSDARG00000087483 | 17.65447819 | 0.762012724  | 0.194577452 | 3.916243721  | 8.99393E-05 | 0.003446329 | si:dkey-226l10.6  | ZDB-GENE-030131-1550 | si:dkey-226l10.6  |
| ENSDARG00000035569 | 129.6478331 | 0.555877249  | 0.142111775 | 3.911549555  | 9.17058E-05 | 0.003506526 | cyp1d1            | ZDB-GENE-041114-179  | cyp1d1            |
| ENSDARG00000078167 | 91.76903819 | 0.619280491  | 0.158342416 | 3.911020856  | 9.19068E-05 | 0.003506735 | si:dkeyp-100h4.1  | ZDB-GENE-081103-7    | si:dkeyp-100h4.1  |
| ENSDARG00000092052 | 26.05752373 | -1.789092711 | 0.457768592 | -3.908290654 | 9.29514E-05 | 0.003539062 | gstk4             | ZDB-GENE-060421-6530 | gstk4             |
| ENSDARG00000042866 | 48.88663001 | -0.728771689 | 0.186636657 | -3.904761805 | 9.43182E-05 | 0.003583494 | cx35.4            | ZDB-GENE-050417-174  | cx35.4            |
| ENSDARG00000036473 | 28.32389581 | 0.738187474  | 0.189141097 | 3.90284019   | 9.50705E-05 | 0.003604437 | snapc2            | ZDB-GENE-120328-2    | snapc2            |
| ENSDARG00000098075 | 518.7272547 | 0.378887381  | 0.097162202 | 3.89953471   | 9.63777E-05 | 0.003643968 | sh3bgrl3          | ZDB-GENE-040426-1059 | sh3bgrl3          |
| ENSDARG00000026895 | 45.07762373 | 0.704332638  | 0.180636155 | 3.899178644  | 9.65195E-05 | 0.003643968 | tor1l3            | ZDB-GENE-040426-1859 | tor1l3            |
| ENSDARG00000010658 | 287.5126293 | -0.879752276 | 0.225726368 | -3.897428038 | 9.72197E-05 | 0.003661778 | insig1            | ZDB-GENE-030131-6121 | insig1            |
| ENSDARG00000016357 | 160.0477923 | 0.556781165  | 0.142875038 | 3.896979985  | 9.73997E-05 | 0.003661778 | fmo5              | ZDB-GENE-030131-6606 | fmo5              |
| ENSDARG00000116139 | 343.1670094 | 0.640496607  | 0.164403354 | 3.895885283  | 9.78407E-05 | 0.003670664 | cdx1b             | ZDB-GENE-070615-29   | cdx1b             |
| ENSDARG00000043850 | 11.33274158 | 1.500229868  | 0.385157636 | 3.895106123  | 9.81557E-05 | 0.003674795 | ffr54             | ZDB-GENE-070620-19   | ffr54             |
| ENSDARG00000035835 | 216.6337969 | -0.44013652  | 0.113014546 | -3.894512139 | 9.83966E-05 | 0.003676137 | eef2k             | ZDB-GENE-020916-2    | eef2k             |
| ENSDARG00000099742 | 170.2407464 | -0.569751485 | 0.146542333 | -3.887965149 | 0.000101088 | 0.003768843 | heatr1            | ZDB-GENE-030131-6378 | heatr1            |
| ENSDARG00000006837 | 35.2380218  | 0.743666728  | 0.191318825 | 3.887054648  | 0.000101468 | 0.003775154 | mycn              | ZDB-GENE-020711-1    | mycn              |
| ENSDARG00000076542 | 88.3362829  | 0.408978238  | 0.105246968 | 3.885890933  | 0.000101955 | 0.003785433 | pogzb             | ZDB-GENE-100609-3    | pogzb             |
| ENSDARG00000027807 | 167.8156496 | 0.554996725  | 0.142879193 | 3.88437752   | 0.000102592 | 0.003801218 | frk               | ZDB-GENE-110411-7    | frk               |
| ENSDARG00000055159 | 39.23619738 | 0.727578457  | 0.187359349 | 3.883331473  | 0.000103035 | 0.003807629 | cyp27a1.4         | ZDB-GENE-030131-1060 | cyp27a1.4         |
| ENSDARG00000071662 | 43.3334218  | 0.648267531  | 0.166961981 | 3.882725443  | 0.000103292 | 0.003807629 | si:rp71-36a1.3    | ZDB-GENE-050208-566  | si:rp71-36a1.3    |
| ENSDARG00000105117 | 163.919884  | -0.579581831 | 0.149281876 | -3.882466161 | 0.000103402 | 0.003807629 | sdad1             | ZDB-GENE-021213-1    | sdad1             |

|                    |             |              |             |              |             |             |                  |                      |                   |
|--------------------|-------------|--------------|-------------|--------------|-------------|-------------|------------------|----------------------|-------------------|
| ENSDARG00000100095 | 132.2290987 | -0.703080091 | 0.181200164 | -3.880129432 | 0.000104401 | 0.003836519 | anxa1b           | ZDB-GENE-030131-6554 | anxa1b            |
| ENSDARG00000098791 | 662.5945216 | 0.61216758   | 0.157797254 | 3.879456486  | 0.00010469  | 0.00383928  | cdhr5b           | ZDB-GENE-110518-2    | cdhr5b            |
| ENSDARG00000058366 | 89.90578673 | 0.531636576  | 0.137088595 | 3.878051093  | 0.000105297 | 0.003853641 | si:dkey-222f8.3  | ZDB-GENE-030131-3658 | si:dkey-222f8.3   |
| ENSDARG00000057687 | 16.22314425 | -1.091424248 | 0.281608388 | -3.875680882 | 0.000106327 | 0.003883424 | sbk3             | ZDB-GENE-080204-39   | sbk3              |
| ENSDARG00000040942 | 54.44525106 | -0.802570989 | 0.207310328 | -3.871350735 | 0.000108234 | 0.003945039 | pnp6             | ZDB-GENE-040426-1800 | pnp6              |
| ENSDARG00000062986 | 213.1727055 | 0.287000346  | 0.074273249 | 3.864114618  | 0.000111493 | 0.004055581 | pnpla7a          | ZDB-GENE-010507-2    | cltc3             |
| ENSDARG00000062986 | 213.1727055 | 0.287000346  | 0.074273249 | 3.864114618  | 0.000111493 | 0.004055581 | pnpla7a          | ZDB-GENE-070112-1812 | pnpla7a           |
| ENSDARG00000070542 | 73.1423772  | -0.743042638 | 0.192377036 | -3.862428979 | 0.000112265 | 0.004075409 | mafbb            | ZDB-GENE-010605-4    | mafbb             |
| ENSDARG00000053097 | 157.6077714 | -0.537603269 | 0.13924863  | -3.860743682 | 0.000113042 | 0.004095333 | hsf2             | ZDB-GENE-011128-1    | hsf2              |
| ENSDARG00000045768 | 218.1186905 | -0.520563748 | 0.135155589 | -3.851588777 | 0.000117354 | 0.004242961 | cry1a            | ZDB-GENE-010426-2    | cry1a             |
| ENSDARG00000015918 | 425.3102712 | -0.401327477 | 0.104226121 | -3.850546036 | 0.000117855 | 0.004252494 | dlat             | ZDB-GENE-030131-2921 | dlat              |
| ENSDARG00000006508 | 48.35903072 | -0.791286351 | 0.205529429 | -3.84999051  | 0.000118122 | 0.004253592 | pip5k1bb         | ZDB-GENE-040912-141  | pip5k1bb          |
| ENSDARG00000097231 | 21.56675638 | 1.080831388  | 0.280989263 | 3.846522027  | 0.000119806 | 0.004290079 | ugt1b2           | ZDB-GENE-080227-11   | ugt1b2            |
| ENSDARG00000013794 | 174.2797927 | -0.891917231 | 0.231881812 | -3.846430314 | 0.000119851 | 0.004290079 | klf11b           | ZDB-GENE-061103-82   | klf11b            |
| ENSDARG00000031836 | 151.8811507 | 0.354186477  | 0.092081968 | 3.846426001  | 0.000119853 | 0.004290079 | vps37c           | ZDB-GENE-061110-126  | vps37c            |
| ENSDARG00000003017 | 84.11291049 | -0.488719274 | 0.127115769 | -3.844678568 | 0.000120711 | 0.004312156 | ube2al           | ZDB-GENE-030131-4195 | ube2al            |
| ENSDARG00000031278 | 91.98251633 | 0.779838866  | 0.202870497 | 3.844023046  | 0.000121034 | 0.004315102 | si:ch73-193i2.2  | ZDB-GENE-141215-32   | si:ch73-193i2.2   |
| ENSDARG00000003615 | 359.5433546 | 0.85343905   | 0.221212288 | 3.842203584  | 0.000121935 | 0.004338599 | slc26a3.2        | ZDB-GENE-041210-179  | slc26a3.2         |
| ENSDARG00000021439 | 691.9110344 | -0.387580868 | 0.100916264 | -3.840618466 | 0.000122725 | 0.004358065 | ncoa4            | ZDB-GENE-040426-689  | ncoa4             |
| ENSDARG00000035458 | 26302.09742 | -0.847917676 | 0.220867396 | -3.839035058 | 0.000123519 | 0.004377594 | atp2a1l          | ZDB-GENE-041229-2    | atp2a1l           |
| ENSDARG00000044298 | 51.8787236  | 0.704587254  | 0.183780139 | 3.833859627  | 0.000126148 | 0.004461962 | phax             | ZDB-GENE-040822-42   | phax              |
| ENSDARG00000070408 | 46.72707872 | 0.523933914  | 0.136759292 | 3.831066301  | 0.000127589 | 0.004504046 | CR751235.1       |                      |                   |
| ENSDARG00000104172 | 587.6261748 | -1.641321494 | 0.429491154 | -3.82154901  | 0.000132616 | 0.004672306 | diabloa          | ZDB-GENE-040426-1303 | diabloa           |
| ENSDARG00000095912 | 73.74346694 | 0.504429566  | 0.13205754  | 3.819771021  | 0.000133576 | 0.004696885 | si:dkey-229b18.3 | ZDB-GENE-030131-6870 | si:dkey-229b18.3  |
| ENSDARG00000043475 | 51.79636867 | -0.752085212 | 0.197009433 | -3.817508645 | 0.000134806 | 0.004730875 | TAGAP            | ZDB-GENE-121214-340  | si:ch211-122h15.4 |
| ENSDARG00000043475 | 51.79636867 | -0.752085212 | 0.197009433 | -3.817508645 | 0.000134806 | 0.004730875 | TAGAP            | ZDB-GENE-040724-50   | tagapb            |
| ENSDARG00000029822 | 6468.840016 | 0.91536388   | 0.23981197  | 3.817006636  | 0.000135081 | 0.004731249 | cel.2            | ZDB-GENE-061110-10   | cel.2             |
| ENSDARG00000025549 | 105.0496044 | -0.555340966 | 0.145518917 | -3.816280223 | 0.000135479 | 0.004732074 | ndufaf1          | ZDB-GENE-050306-9    | ndufaf1           |
| ENSDARG00000109859 | 8.970086145 | -1.394684455 | 0.365552732 | -3.815275695 | 0.000136031 | 0.004732074 | CABZ01072242.1   |                      |                   |
| ENSDARG00000025855 | 27.64847373 | -0.79720658  | 0.208981421 | -3.814724658 | 0.000136335 | 0.004732074 | camk2n1a         | ZDB-GENE-050522-319  | camk2n1a          |
| ENSDARG00000012311 | 339.8601076 | -0.632571609 | 0.165835096 | -3.814461614 | 0.00013648  | 0.004732074 | myoz2a           | ZDB-GENE-040426-1880 | myoz2a            |
| ENSDARG00000045277 | 84.75115779 | 0.608708166  | 0.159585765 | 3.81430114   | 0.000136569 | 0.004732074 | rdh12l           | ZDB-GENE-040801-48   | rdh12l            |
| ENSDARG00000076118 | 40.66290858 | -0.573474397 | 0.150356929 | -3.814086929 | 0.000136687 | 0.004732074 | cdip1            | ZDB-GENE-070720-18   | cdip1             |
| ENSDARG00000060862 | 78.1092169  | -0.461032996 | 0.12094165  | -3.812028332 | 0.000137831 | 0.004762475 | atxn1b           | ZDB-GENE-061218-2    | atxn1b            |
| ENSDARG00000034105 | 131.4916812 | -0.565354229 | 0.148366464 | -3.810525727 | 0.000138672 | 0.004782303 | mtus1b           | ZDB-GENE-070619-5    | mtus1b            |
| ENSDARG00000088835 | 71.9143592  | 0.455390387  | 0.119709745 | 3.804121266  | 0.000142308 | 0.004898306 | efs              | ZDB-GENE-030131-1658 | efs               |
| ENSDARG0000002071  | 124.890102  | -0.541884555 | 0.142502757 | -3.802625057 | 0.000143171 | 0.004912131 | adss             | ZDB-GENE-050417-337  | adss              |
| ENSDARG00000078251 | 20.9477736  | 0.915353139  | 0.240725639 | 3.802474648  | 0.000143258 | 0.004912131 | TESK1            | ZDB-GENE-090312-74   | si:ch211-113e8.3  |
| ENSDARG00000017982 | 92.65465618 | 1.082577206  | 0.284927266 | 3.799486165  | 0.000144996 | 0.004962253 | cyp39a1          | ZDB-GENE-041014-339  | cyp39a1           |
| ENSDARG00000102632 | 1522.370911 | -0.45961329  | 0.121036776 | -3.797302823 | 0.000146279 | 0.004994088 | ubc              | ZDB-GENE-061110-88   | ubc               |
| ENSDARG00000090882 | 269.8799728 | 0.560754741  | 0.14768533  | 3.796956286  | 0.000146484 | 0.004994088 | si:rp71-36a1.5   | ZDB-GENE-091204-428  | si:rp71-36a1.5    |
| ENSDARG00000043970 | 335.7961559 | -0.426295364 | 0.112300174 | -3.79603475  | 0.000147029 | 0.005003167 | lrpprc           | ZDB-GENE-030131-7887 | lrpprc            |
| ENSDARG00000063511 | 127.9474893 | 0.537266411  | 0.141557692 | 3.795388315  | 0.000147413 | 0.005006722 | si:ch211-15d5.11 | ZDB-GENE-131121-177  | si:ch211-15d5.11  |
| ENSDARG00000059701 | 304.3539773 | 0.310774633  | 0.081940631 | 3.792680484  | 0.00014903  | 0.005052084 | flii             | ZDB-GENE-071212-3    | flii              |
| ENSDARG00000032651 | 159.6548694 | 0.383128943  | 0.101132225 | 3.788396275  | 0.000151623 | 0.005130289 | ppp1r10          | ZDB-GENE-020419-15   | ppp1r10           |
| ENSDARG00000023040 | 39.89850328 | 0.552646964  | 0.145904711 | 3.787725296  | 0.000152033 | 0.005134471 | zbtb1            | ZDB-GENE-041001-126  | zbtb1             |
| ENSDARG00000059925 | 230.2661123 | -0.394275647 | 0.104250863 | -3.781989281 | 0.00015558  | 0.005244393 | usp24            | ZDB-GENE-030131-4356 | usp24             |
| ENSDARG00000105607 | 115.8294392 | 0.923956541  | 0.244410728 | 3.780343642  | 0.000156612 | 0.005269276 | si:dkey-183c6.9  | ZDB-GENE-160728-24   | si:dkey-183c6.9   |
| ENSDARG00000079474 | 5.411092853 | 1.521576163  | 0.402548335 | 3.779859536  | 0.000156917 | 0.005269644 | MSANTD2          | ZDB-GENE-091204-270  | si:ch211-80m8.2   |

|                     |             |              |             |              |             |             |                  |                      |                  |
|---------------------|-------------|--------------|-------------|--------------|-------------|-------------|------------------|----------------------|------------------|
| ENSDARG0000067996   | 142.1748617 | 0.369422053  | 0.09799199  | 3.76992091   | 0.000163299 | 0.005473731 | csk              | ZDB-GENE-061103-493  | csk              |
| ENSDARG00000104467  | 194.2807181 | -1.071759102 | 0.284494625 | -3.767238486 | 0.000165063 | 0.005507123 | bglapl           |                      |                  |
| ENSDARG00000012071  | 259.0826122 | -0.553617047 | 0.146964373 | -3.767015324 | 0.000165211 | 0.005507123 | angptl1a         | ZDB-GENE-040724-269  | angptl1a         |
| ENSDARG00000013926  | 353.2104909 | 0.862345972  | 0.228920761 | 3.767006394  | 0.000165217 | 0.005507123 | slc16a9a         | ZDB-GENE-040426-1364 | slc16a9a         |
| ENSDARG00000055226  | 141.1960412 | -0.720095022 | 0.191458071 | -3.761110807 | 0.00016916  | 0.005628116 | slc7a7           | ZDB-GENE-051127-5    | slc7a7           |
| ENSDARG00000043514  | 162.5060287 | 0.796984119  | 0.211973721 | 3.759825112  | 0.000170032 | 0.005638894 | si:key-239i20.4  | ZDB-GENE-030131-2644 | si:key-239i20.4  |
| ENSDARG00000057652  | 482.4642488 | -0.49715978  | 0.132233693 | -3.759705779 | 0.000170113 | 0.005638894 | dbpb             | ZDB-GENE-100922-6    | dbpb             |
| ENSDARG00000090900  | 109.6971046 | -1.238973168 | 0.329688167 | -3.758015275 | 0.000171266 | 0.005666644 | apnl             | ZDB-GENE-030131-8907 | apnl             |
| ENSDARG00000089390  | 31.75874008 | -0.966110561 | 0.257553361 | -3.751108341 | 0.000176055 | 0.005814341 | pnpla2           | ZDB-GENE-120913-3    | pnpla2           |
| ENSDARG00000070484  | 185.8256424 | -0.691431101 | 0.184370013 | -3.75023623  | 0.000176668 | 0.005823875 | zgc:195001       | ZDB-GENE-081022-173  | zgc:195001       |
| ENSDARG00000007823  | 69.5699399  | 0.910496971  | 0.243060374 | 3.74597042   | 0.000179698 | 0.005912881 | atf3             | ZDB-GENE-040426-728  | atf3             |
| ENSDARG00000004451  | 56.88307859 | 0.520418904  | 0.139049853 | 3.742678571  | 0.000182069 | 0.005979935 | tnfrsfa          | ZDB-GENE-010802-1    | tnfrsfa          |
| ENSDARG00000008553  | 136.2695422 | 0.637139946  | 0.170322589 | 3.740783603  | 0.000183447 | 0.00600625  | zgc:136872       | ZDB-GENE-060421-5204 | zgc:136872       |
| ENSDARG00000022183  | 78.93101766 | 0.781013926  | 0.208790595 | 3.74065664   | 0.00018354  | 0.00600625  | gst1             | ZDB-GENE-040718-365  | gst1             |
| ENSDARG00000070581  | 93.41813664 | 0.618673577  | 0.165447876 | 3.739386632  | 0.00018447  | 0.006025255 | ggact.1          | ZDB-GENE-061103-94   | ggact.1          |
| ENSDARG00000000001  | 9.197301379 | -1.233841826 | 0.329997163 | -3.738946769 | 0.000184793 | 0.006025255 | slc35a5          | ZDB-GENE-030616-55   | slc35a5          |
| ENSDARG00000071673  | 59.53379406 | -0.683109384 | 0.182779136 | -3.737348791 | 0.000185971 | 0.00605266  | ctdspla          | ZDB-GENE-060825-333  | ctdspla          |
| ENSDARG00000020741  | 3294.027873 | -0.585473132 | 0.157021195 | -3.728624876 | 0.000192527 | 0.006254702 | fga              | ZDB-GENE-031010-21   | fga              |
| ENSDARG00000019304  | 4.787111318 | -1.47088003  | 0.39542881  | -3.719708809 | 0.000199453 | 0.006460037 | phactr3b         | ZDB-GENE-050522-156  | phactr3b         |
| ENSDARG00000060215  | 60.86469117 | -0.576678544 | 0.155039361 | -3.719562185 | 0.000199568 | 0.006460037 | cep85            | ZDB-GENE-030131-1998 | cep85            |
| ENSDARG00000000906  | 42.93318181 | 0.567935953  | 0.152720051 | 3.718804116  | 0.000200168 | 0.006467777 | skap2            | ZDB-GENE-030616-438  | skap2            |
| ENSDARG00000086848  | 33.0127171  | -0.75356731  | 0.203046061 | -3.711312127 | 0.000206188 | 0.006650294 | atad3            | ZDB-GENE-040426-1826 | atad3            |
| ENSDARG00000079560  | 335.0370807 | 0.70127187   | 0.189102873 | 3.708414678  | 0.000208561 | 0.006714763 | ptprh            | ZDB-GENE-091118-90   | ptprh            |
| ENSDARG000000062598 | 30.32439795 | 0.683470612  | 0.184439979 | 3.705653265  | 0.000210847 | 0.006776186 | lhc4s            | ZDB-GENE-110411-32   | lhc4s            |
| ENSDARG00000024829  | 95.73516929 | -0.585911136 | 0.158279291 | -3.701754861 | 0.000214113 | 0.006868866 | tnn              | ZDB-GENE-990415-262  | tnn              |
| ENSDARG00000101990  | 19.44089996 | -1.750248731 | 0.472883604 | -3.70122524  | 0.000214561 | 0.00687093  | CU571315.3       |                      |                  |
| ENSDARG00000005210  | 106.8652939 | 0.571234012  | 0.154642168 | 3.693908447  | 0.000220833 | 0.007048149 | coro2a           | ZDB-GENE-030131-2258 | coro2a           |
| ENSDARG00000069293  | 5280.442497 | -0.651699836 | 0.176428173 | -3.693853565 | 0.000220881 | 0.007048149 | ahsg2            | ZDB-GENE-030131-1133 | ahsg2            |
| ENSDARG00000097446  | 90.08875186 | 1.840189099  | 0.498254716 | 3.693269806  | 0.000221389 | 0.007051807 | si:ch211-66i15.5 | ZDB-GENE-090313-122  | si:ch211-66i15.5 |
| ENSDARG00000007737  | 52.61798126 | -0.52265728  | 0.141534056 | -3.692802252 | 0.000221796 | 0.007052263 | zyg11            | ZDB-GENE-041014-17   | zyg11            |
| ENSDARG00000074282  | 413.5009772 | 0.550306862  | 0.149092489 | 3.691043497  | 0.000223336 | 0.007088643 | si:ch73-12o23.1  | ZDB-GENE-130530-749  | si:ch73-12o23.1  |
| ENSDARG00000008969  | 2866.469989 | -0.644958964 | 0.17488283  | -3.687949027 | 0.000226069 | 0.00716271  | fgb              | ZDB-GENE-030131-9261 | fgb              |
| ENSDARG00000099329  | 176.5901544 | 0.404843262  | 0.109868792 | 3.684788522  | 0.000228893 | 0.007239385 | h2afy            | ZDB-GENE-060421-4796 | h2afy            |
| ENSDARG00000110991  | 56.7862377  | -0.717719999 | 0.194976441 | -3.681060111 | 0.000232266 | 0.007333152 | ZNF276           | ZDB-GENE-070209-176  | zgc:158366       |
| ENSDARG00000068710  | 853.2601085 | -0.43408262  | 0.118170995 | -3.673343191 | 0.000239398 | 0.007545022 | nid1a            | ZDB-GENE-050302-58   | nid1a            |
| ENSDARG00000035327  | 15014.56052 | -0.631078164 | 0.171992559 | -3.669217838 | 0.000243294 | 0.007654361 | ckma             | ZDB-GENE-980526-109  | ckma             |
| ENSDARG00000061717  | 16.69511866 | 0.953817241  | 0.2600874   | 3.667295081  | 0.00024513  | 0.007698623 | cytip            | ZDB-GENE-140106-76   | cytip            |
| ENSDARG00000060494  | 687.7044045 | -0.346293522 | 0.094504011 | -3.664326187 | 0.000247991 | 0.007764878 | eprs             | ZDB-GENE-030131-638  | eprs             |
| ENSDARG00000089245  | 33.38801193 | -0.699031227 | 0.19077282  | -3.66420765  | 0.000248105 | 0.007764878 | dusp23b          | ZDB-GENE-040718-163  | dusp23b          |
| ENSDARG00000008255  | 190.5396774 | -0.396694886 | 0.108298646 | -3.662971805 | 0.000249306 | 0.0077756   | cnot6a           | ZDB-GENE-030131-2768 | cnot6a           |
| ENSDARG00000011613  | 289.8417127 | -0.316549064 | 0.08641887  | -3.662962301 | 0.000249315 | 0.0077756   | rhm39a           | ZDB-GENE-040426-2852 | rhm39a           |
| ENSDARG00000089724  | 21.815473   | -1.113504647 | 0.304227531 | -3.660104797 | 0.000252112 | 0.007823756 | cylb             | ZDB-GENE-100208-1    | cylb             |
| ENSDARG00000074293  | 42.25628219 | 0.509733631  | 0.139281248 | 3.659743411  | 0.000252468 | 0.007823756 | adnpb            | ZDB-GENE-030131-6385 | adnpb            |
| ENSDARG00000044760  | 162.5226265 | 0.364388954  | 0.099568618 | 3.65967671   | 0.000252534 | 0.007823756 | gnaia            | ZDB-GENE-030131-2229 | gnaia            |
| ENSDARG00000021033  | 73.69156074 | -0.447438123 | 0.12226552  | -3.659560945 | 0.000252648 | 0.007823756 | herpud2          | ZDB-GENE-040426-868  | herpud2          |
| ENSDARG00000019236  | 137.1185374 | 0.563981128  | 0.154128465 | 3.659162687  | 0.000253041 | 0.007823756 | gsr              | ZDB-GENE-050522-116  | gsr              |
| ENSDARG00000043923  | 103.9128459 | 0.458690513  | 0.125398252 | 3.657870085  | 0.00025432  | 0.007849774 | sox9b            | ZDB-GENE-001103-2    | sox9b            |
| ENSDARG00000016439  | 61.25759538 | -0.611044388 | 0.167370221 | -3.650854873 | 0.000261369 | 0.008053485 | slc7a1           | ZDB-GENE-091116-69   | slc7a1           |
| ENSDARG00000062182  | 60.40142809 | -0.692424601 | 0.189761453 | -3.648921259 | 0.000263344 | 0.008100419 | slc22a7b.3       | ZDB-GENE-131120-103  | slc22a7b.3       |

|                    |             |              |             |              |             |             |                  |                      |                  |
|--------------------|-------------|--------------|-------------|--------------|-------------|-------------|------------------|----------------------|------------------|
| ENSDARG00000076381 | 306.7560263 | -0.478538527 | 0.131192708 | -3.64760004  | 0.000264701 | 0.008128232 | slc25a1b         | ZDB-GENE-130114-1    | slc25a1b         |
| ENSDARG00000036493 | 17.02698201 | -0.896108893 | 0.24580503  | -3.645608438 | 0.00026676  | 0.008177445 | si:ch73-174h16.4 | ZDB-GENE-160728-69   | si:ch73-174h16.4 |
| ENSDARG00000003446 | 142.9126309 | 0.512206177  | 0.140604229 | 3.642893123  | 0.000269591 | 0.008250122 | ippk             | ZDB-GENE-050327-41   | ippk             |
| ENSDARG00000042141 | 53.26419799 | 0.585631809  | 0.160782571 | 3.642383665  | 0.000270125 | 0.00825239  | myo6b            | ZDB-GENE-030318-3    | myo6b            |
| ENSDARG00000068257 | 20.4516725  | -0.740514814 | 0.203555919 | -3.637893798 | 0.000274877 | 0.008381797 | kcne4            | ZDB-GENE-050419-163  | kcne4            |
| ENSDARG00000006220 | 1377.352279 | 0.553561737  | 0.152181864 | 3.637501367  | 0.000275296 | 0.008381797 | ugt1a7           | ZDB-GENE-071004-5    | ugt1a2           |
| ENSDARG00000006220 | 1377.352279 | 0.553561737  | 0.152181864 | 3.637501367  | 0.000275296 | 0.008381797 | ugt1a7           | ZDB-GENE-071004-4    | ugt1a1           |
| ENSDARG00000006220 | 1377.352279 | 0.553561737  | 0.152181864 | 3.637501367  | 0.000275296 | 0.008381797 | ugt1a7           | ZDB-GENE-080227-5    | ugt1a6           |
| ENSDARG00000006220 | 1377.352279 | 0.553561737  | 0.152181864 | 3.637501367  | 0.000275296 | 0.008381797 | ugt1a7           | ZDB-GENE-080227-6    | ugt1a7           |
| ENSDARG00000053569 | 10.29713344 | -1.517402368 | 0.417421994 | -3.635175891 | 0.000277791 | 0.008443435 | sox3             | ZDB-GENE-980526-333  | sox3             |
| ENSDARG00000113643 | 66.07955482 | 0.514689199  | 0.141651036 | 3.63350114   | 0.000279601 | 0.008484075 | ralbb            | ZDB-GENE-040625-121  | ralbb            |
| ENSDARG0000004218  | 33.86757041 | 0.791153824  | 0.217787081 | 3.632694006  | 0.000280478 | 0.00849629  | rnd1b            | ZDB-GENE-060315-7    | rnd1b            |
| ENSDARG00000034988 | 5.621683385 | -1.491870441 | 0.410794858 | -3.631667758 | 0.000281596 | 0.008515771 | asb4             | ZDB-GENE-050417-100  | asb4             |
| ENSDARG00000034852 | 65.4810669  | -0.879353445 | 0.242316882 | -3.628940079 | 0.000284587 | 0.008591757 | nt5c2l1          | ZDB-GENE-031006-8    | nt5c2l1          |
| ENSDARG00000069893 | 281.1631971 | 0.58209677   | 0.160474605 | 3.62734508   | 0.00028635  | 0.008619686 | sphk2            | ZDB-GENE-100922-225  | sphk2            |
| ENSDARG00000060854 | 40.36944926 | -0.589272076 | 0.162457697 | -3.627233962 | 0.000286474 | 0.008619686 | kctd3            | ZDB-GENE-060503-169  | kctd3            |
| ENSDARG00000071215 | 68.2960927  | 0.455216227  | 0.125535021 | 3.626209044  | 0.000287613 | 0.008639457 | palm3            | ZDB-GENE-061215-74   | palm3            |
| ENSDARG00000056621 | 248.9158599 | 0.261241709  | 0.072075781 | 3.62454217   | 0.000289474 | 0.008654266 | ctcf             | ZDB-GENE-040624-5    | ctcf             |
| ENSDARG00000079340 | 39.03727353 | -0.645186857 | 0.178006264 | -3.624517715 | 0.000289501 | 0.008654266 | slc47a4          | ZDB-GENE-130530-865  | slc47a4          |
| ENSDARG00000016391 | 16.12619533 | -1.164476366 | 0.321318678 | -3.624054385 | 0.000290021 | 0.008654266 | calcoco1b        | ZDB-GENE-031118-126  | calcoco1b        |
| ENSDARG00000100020 | 197.1381125 | -0.653808188 | 0.180422062 | -3.623770737 | 0.000290339 | 0.008654266 | pim1             | ZDB-GENE-061013-139  | pim1             |
| ENSDARG00000054058 | 360.7321962 | 0.628886448  | 0.17355242  | 3.623610948  | 0.000290518 | 0.008654266 | h1fx             | ZDB-GENE-030131-1228 | h1fx             |
| ENSDARG00000031534 | 48.30450291 | 0.706680857  | 0.19518411  | 3.620213018  | 0.000294361 | 0.008754176 | CU571315.1       |                      |                  |
| ENSDARG00000071014 | 258.2465069 | 0.51449805   | 0.142185522 | 3.618498164  | 0.000296318 | 0.008797787 | s100u            | ZDB-GENE-030131-3121 | s100u            |
| ENSDARG00000008238 | 64.88763986 | 0.552111455  | 0.152686805 | 3.615973585  | 0.000299221 | 0.008869303 | manba            | ZDB-GENE-040426-721  | manba            |
| ENSDARG00000063375 | 117.2170949 | 0.446448132  | 0.123542375 | 3.6137247    | 0.00030183  | 0.008931863 | pter             | ZDB-GENE-060825-190  | pter             |
| ENSDARG00000041359 | 61.13014717 | 0.436401394  | 0.120783827 | 3.613078052  | 0.000302584 | 0.008939425 | zgc:161969       | ZDB-GENE-030131-2597 | zgc:161969       |
| ENSDARG00000077300 | 67.86417219 | 0.49943698   | 0.138423253 | 3.608042501  | 0.000308516 | 0.009099699 | usp42            | ZDB-GENE-030131-5739 | usp42            |
| ENSDARG00000036058 | 38.72445513 | 0.777104701  | 0.215464734 | 3.606644518  | 0.000310182 | 0.00913382  | gnao1b           | ZDB-GENE-040426-1693 | gnao1b           |
| ENSDARG00000078041 | 162.1256787 | 0.517633656  | 0.143680536 | 3.602670682  | 0.000314964 | 0.009259439 | xpo1a            | ZDB-GENE-050309-201  | xpo1a            |
| ENSDARG00000088390 | 90.63326046 | -0.78448502  | 0.217802662 | -3.60181558  | 0.000316003 | 0.009266491 | nme4             | ZDB-GENE-040426-1043 | nme4             |
| ENSDARG00000009134 | 48.76383452 | 0.581515255  | 0.161459263 | 3.601622124  | 0.000316238 | 0.009266491 | hlx1             | ZDB-GENE-030131-5304 | hlx1             |
| ENSDARG00000062370 | 114.8330058 | -0.473460871 | 0.131513529 | -3.600092498 | 0.000318104 | 0.009304878 | bcl2l13          | ZDB-GENE-050419-215  | bcl2l13          |
| ENSDARG00000104039 | 173.1613809 | -0.707986619 | 0.196679386 | -3.59969915  | 0.000318586 | 0.009304878 | errfi1a          | ZDB-GENE-030131-6256 | errfi1a          |
| ENSDARG00000058693 | 1360.92534  | -0.325295241 | 0.090380845 | -3.599161308 | 0.000319245 | 0.00930898  | cast             | ZDB-GENE-050810-2    | cast             |
| ENSDARG00000095102 | 13.3069466  | 1.222814803  | 0.339902713 | 3.597543519  | 0.000321237 | 0.009337797 | si:ch211-132g1.4 | ZDB-GENE-090313-26   | si:ch211-132g1.4 |
| ENSDARG00000070140 | 400.575116  | 1.344040456  | 0.373609173 | 3.597450362  | 0.000321352 | 0.009337797 | RETSAT           | ZDB-GENE-061110-141  | zgc:154169       |
| ENSDARG00000075048 | 205.5960192 | -0.670742681 | 0.186470016 | -3.597053801 | 0.000321842 | 0.009337797 | lonrf1           | ZDB-GENE-101021-4    | lonrf1           |
| ENSDARG00000037894 | 72.14167567 | 0.652678961  | 0.181467538 | 3.596670609  | 0.000322316 | 0.009337797 | ezh1             | ZDB-GENE-050114-1    | ezh1             |
| ENSDARG00000069735 | 21.67953976 | -2.660248459 | 0.740396884 | -3.593003317 | 0.000326888 | 0.009454984 | hbaa2            | ZDB-GENE-081104-38   | hbaa2            |
| ENSDARG00000043986 | 15.42517549 | 0.857440325  | 0.238845538 | 3.589936547  | 0.000330758 | 0.009541289 | setd6            | ZDB-GENE-030131-1067 | setd6            |
| ENSDARG00000055514 | 80.7496699  | -0.77733383  | 0.216539811 | -3.589796386 | 0.000330936 | 0.009541289 | icn2             | ZDB-GENE-070822-9    | icn2             |
| ENSDARG00000092778 | 66.00734491 | -1.07158227  | 0.298769789 | -3.586648686 | 0.000334955 | 0.009638411 | si:ch73-338o16.4 | ZDB-GENE-131119-14   | si:ch73-338o16.4 |
| ENSDARG00000019417 | 59.63933557 | -0.974511233 | 0.271748911 | -3.586072271 | 0.000335696 | 0.009638411 | gadd45ga         | ZDB-GENE-040426-1882 | gadd45ga         |
| ENSDARG00000056045 | 128.5413005 | 0.528851101  | 0.147480708 | 3.585900197  | 0.000335917 | 0.009638411 | si:ch73-139e5.4  | ZDB-GENE-130531-31   | si:ch73-139e5.4  |
| ENSDARG00000115817 | 13.85680544 | 20.8169435   | 5.15591288  | 3.57950593   | 0.000344244 | 0.009861558 | si:dkey-46g23.2  | ZDB-GENE-070705-476  | si:dkey-46g23.2  |
| ENSDARG00000061378 | 41.37182393 | -0.594096652 | 0.166220299 | -3.574152224 | 0.000351364 | 0.010049472 | smg8             | ZDB-GENE-091204-279  | smg8             |
| ENSDARG00000037748 | 172.8690385 | -0.44686847  | 0.125056639 | -3.57332865  | 0.000352472 | 0.010065094 | slc43a1b         | ZDB-GENE-070209-173  | slc43a1b         |
| ENSDARG00000053159 | 42.49322934 | 0.482849495  | 0.135145905 | 3.572801535  | 0.000353182 | 0.010069349 | zgc:110626       | ZDB-GENE-050417-447  | zgc:110626       |

|                    |             |              |             |              |             |             |                     |                      |                   |
|--------------------|-------------|--------------|-------------|--------------|-------------|-------------|---------------------|----------------------|-------------------|
| ENSDARG0000069603  | 218.1706268 | 0.296689115  | 0.083078765 | 3.571178673  | 0.000355378 | 0.010115873 | taok1a              | ZDB-GENE-130103-9    | taok1a            |
| ENSDARG0000034771  | 110.9236505 | 0.481898248  | 0.13500415  | 3.569506929  | 0.000357654 | 0.010158533 | rab13               | ZDB-GENE-030826-30   | rab13             |
| ENSDARG0000068586  | 2752.2284   | 0.686539811  | 0.192348689 | 3.569246112  | 0.00035801  | 0.010158533 | CU302253.1          |                      |                   |
| ENSDARG0000088013  | 22.907854   | 0.883652316  | 0.247804055 | 3.565931628  | 0.000362566 | 0.010271555 | CYP27A1 (1 of many) | ZDB-GENE-060616-143  | zgc:136333        |
| ENSDARG00000103720 | 422.6751942 | -0.569329419 | 0.159838937 | -3.561894434 | 0.000368188 | 0.01041439  | zgc:162730          | ZDB-GENE-030131-6366 | zgc:162730        |
| ENSDARG0000097539  | 25.71138722 | -1.841539899 | 0.517245342 | -3.560283196 | 0.000370455 | 0.010462001 | si:ch211-39f2.3     | ZDB-GENE-131126-52   | si:ch211-39f2.3   |
| ENSDARG0000093279  | 35.46215365 | 0.952403106  | 0.267798599 | 3.556415562  | 0.000375949 | 0.010600468 | si:dkey-11o1.3      | ZDB-GENE-100921-37   | si:dkey-11o1.3    |
| ENSDARG00000112049 | 80.25099004 | 0.637400671  | 0.179257553 | 3.55578139   | 0.000376857 | 0.010609392 | cldn15a             | ZDB-GENE-040426-1305 | cldn15a           |
| ENSDARG0000079150  | 57.34242955 | 0.557859341  | 0.157012261 | 3.552966741  | 0.000380913 | 0.010706749 | si:ch211-276i12.9   | ZDB-GENE-141216-132  | si:ch211-276i12.9 |
| ENSDARG0000060954  | 84.23875765 | 0.405195227  | 0.11406096  | 3.55244448   | 0.00038167  | 0.010711236 | tmcc1b              | ZDB-GENE-061013-154  | tmcc1b            |
| ENSDARG0000013542  | 142.7490317 | 0.372623075  | 0.104930379 | 3.551145801  | 0.000383558 | 0.010747411 | lpgat1              | ZDB-GENE-030131-2906 | lpgat1            |
| ENSDARG0000005186  | 82.90208701 | 0.403337557  | 0.113640301 | 3.549247516  | 0.000386334 | 0.010797733 | sp4                 | ZDB-GENE-031202-3    | sp4               |
| ENSDARG0000054363  | 85.46834733 | -0.472113543 | 0.133032401 | -3.548861335 | 0.000386901 | 0.010797733 | si:zfos-464b6.2     | ZDB-GENE-030131-5337 | si:zfos-464b6.2   |
| ENSDARG0000039929  | 899.6387279 | -0.577425162 | 0.162715255 | -3.548684863 | 0.00038716  | 0.010797733 | ckmt2b              | ZDB-GENE-040426-1654 | ckmt2b            |
| ENSDARG0000054898  | 95.27898681 | 0.640833919  | 0.18062385  | 3.547892034  | 0.000388327 | 0.010803947 | ms4a17a.16          | ZDB-GENE-060825-240  | ms4a17a.16        |
| ENSDARG0000042187  | 196.5698815 | 0.265588053  | 0.074861713 | 3.547715411  | 0.000388588 | 0.010803947 | smek1               | ZDB-GENE-030131-3958 | smek1             |
| ENSDARG0000039007  | 3661.598659 | -0.447792754 | 0.126299238 | -3.545490528 | 0.000391883 | 0.010875962 | eno3                | ZDB-GENE-031006-5    | eno3              |
| ENSDARG0000007601  | 38.49572483 | 0.620038883  | 0.174897827 | 3.545149148  | 0.000392391 | 0.010875962 | zmynd8              | ZDB-GENE-041119-1    | zmynd8            |
| ENSDARG0000077637  | 28.63845313 | 0.85276246   | 0.240686516 | 3.543042107  | 0.00039554  | 0.010936553 | mal2                | ZDB-GENE-081022-204  | mal2              |
| ENSDARG0000013430  | 4673.543014 | -0.566722728 | 0.159961449 | -3.542870681 | 0.000395797 | 0.010936553 | bhmt                | ZDB-GENE-030131-947  | bhmt              |
| ENSDARG0000038666  | 71.82154635 | -2.29783645  | 0.649218978 | -3.539385826 | 0.000401059 | 0.011064915 | igfbp1b             | ZDB-GENE-081210-3    | igfbp1b           |
| ENSDARG0000070672  | 32.65221985 | -0.822466785 | 0.232423111 | -3.538661807 | 0.000402161 | 0.011078262 | slc2a9l1            | ZDB-GENE-090915-3    | slc2a9l1          |
| ENSDARG0000034700  | 122.5202729 | 0.468664736  | 0.132461757 | 3.53811354   | 0.000402997 | 0.011084264 | vegfab              | ZDB-GENE-030131-4605 | vegfab            |
| ENSDARG00000103199 | 120.8989847 | -0.76834465  | 0.217344218 | -3.535151096 | 0.000407542 | 0.011192116 | si:dkey-247k7.2     | ZDB-GENE-031118-45   | si:dkey-247k7.2   |
| ENSDARG0000030107  | 291.8482929 | -0.549222718 | 0.155532235 | -3.531246871 | 0.000413606 | 0.011321386 | si:ch211-207i1.2    | ZDB-GENE-041014-149  | si:ch211-207i1.2  |
| ENSDARG0000042469  | 117.2703598 | -0.53178617  | 0.150602847 | -3.531049907 | 0.000413914 | 0.011321386 | ndufa12             | ZDB-GENE-050828-1    | ndufa12           |
| ENSDARG00000078349 | 193.4461066 | 0.732086887  | 0.207336998 | 3.530903281  | 0.000414143 | 0.011321386 | zmp:0000000845      | ZDB-GENE-130530-848  | zmp:0000000845    |
| ENSDARG0000067889  | 47.97253187 | 0.659189821  | 0.18675322  | 3.529737386  | 0.000415972 | 0.011354082 | gltpd2              | ZDB-GENE-060526-346  | gltpd2            |
| ENSDARG0000022410  | 371.5056448 | -0.395985546 | 0.112248848 | -3.527747074 | 0.000419112 | 0.011422406 | rrp12               | ZDB-GENE-050706-182  | rrp12             |
| ENSDARG0000001950  | 1128.068685 | -0.46983908  | 0.133315017 | -3.524277237 | 0.00042464  | 0.011555484 | ak1                 | ZDB-GENE-040822-37   | ak1               |
| ENSDARG0000051861  | 469.5602254 | -0.550803869 | 0.156323476 | -3.523487851 | 0.000425907 | 0.011572399 | pkp3a               | ZDB-GENE-060512-114  | pkp3a             |
| ENSDARG0000037872  | 154.0467273 | -0.527467048 | 0.150010646 | -3.51619744  | 0.000437775 | 0.01187689  | foxk1               | ZDB-GENE-030131-6402 | foxk1             |
| ENSDARG0000013856  | 7064.840046 | 0.833131707  | 0.236994976 | 3.515398178  | 0.000439095 | 0.011894702 | amy2a               | ZDB-GENE-040426-2393 | amy2a             |
| ENSDARG0000005565  | 125.3793092 | -0.685687581 | 0.195112554 | -3.514318112 | 0.000440884 | 0.011925161 | entpd8              | ZDB-GENE-040724-142  | entpd8            |
| ENSDARG00000077040 | 45.65391189 | -0.519709503 | 0.147920723 | -3.513432682 | 0.000442356 | 0.011946956 | si:ch211-85n16.4    | ZDB-GENE-030131-7043 | si:ch211-85n16.4  |
| ENSDARG00000104587 | 610.2278704 | -0.60598393  | 0.172505049 | -3.512847488 | 0.000443332 | 0.011955294 | srl                 | ZDB-GENE-061110-91   | srl               |
| ENSDARG0000079717  | 52.62383179 | 0.510307252  | 0.145337642 | 3.511184337  | 0.000446115 | 0.012012281 | rbm12b              | ZDB-GENE-030131-6428 | rbm12b            |
| ENSDARG00000036135 | 301.9568294 | -0.681774022 | 0.194299307 | -3.508885516 | 0.000449989 | 0.012098418 | bbox1               | ZDB-GENE-050417-218  | bbox1             |
| ENSDARG0000089697  | 36.44813167 | 0.856039549  | 0.244068267 | 3.507377501  | 0.000452547 | 0.012146878 | nfe2l2b             | ZDB-GENE-120320-3    | nfe2l2b           |
| ENSDARG0000069342  | 74.8048606  | 0.637026623  | 0.181642996 | 3.507025521  | 0.000453146 | 0.012146878 | zgc:153115          | ZDB-GENE-061013-418  | zgc:153115        |
| ENSDARG00000100190 | 22.68429477 | -1.098389482 | 0.313261776 | -3.506299091 | 0.000454384 | 0.012161902 | si:ch211-188p14.4   | ZDB-GENE-121214-355  | si:ch211-188p14.4 |
| ENSDARG0000074245  | 214.028542  | 0.404602584  | 0.115433581 | 3.505068275  | 0.00045649  | 0.012200058 | spen                | ZDB-GENE-050309-70   | spen              |
| ENSDARG0000013711  | 697.4915346 | 0.420447036  | 0.120166372 | 3.498874337  | 0.000467227 | 0.012468418 | zgc:77486           | ZDB-GENE-040426-2056 | zgc:77486         |
| ENSDARG0000012574  | 69.56197194 | 0.543604327  | 0.155452824 | 3.496908673  | 0.000470683 | 0.012541987 | slkb                | ZDB-GENE-030131-1684 | slkb              |
| ENSDARG0000011371  | 140.4107802 | -0.600056762 | 0.171648565 | -3.495844902 | 0.000472563 | 0.012569298 | zgc:64106           | ZDB-GENE-040426-1370 | zgc:64106         |
| ENSDARG0000020574  | 2948.433249 | -0.886606506 | 0.253639605 | -3.495536536 | 0.00047311  | 0.012569298 | atp2a1              | ZDB-GENE-020905-1    | atp2a1            |
| ENSDARG0000036967  | 78.78671247 | -0.537425195 | 0.153789134 | -3.494558961 | 0.000474846 | 0.012596758 | smox                | ZDB-GENE-031201-3    | smox              |
| ENSDARG0000078878  | 14.27373158 | 1.49927869   | 0.429088995 | 3.494097281  | 0.000475668 | 0.012599923 | si:ch73-244f7.3     | ZDB-GENE-121214-178  | si:ch73-244f7.3   |
| ENSDARG0000053104  | 43.99722832 | -0.50462915  | 0.144460376 | -3.493201141 | 0.000477267 | 0.012623638 | fam102ba            | ZDB-GENE-060616-312  | fam102ba          |

|                    |             |              |             |              |             |             |                   |                      |                   |
|--------------------|-------------|--------------|-------------|--------------|-------------|-------------|-------------------|----------------------|-------------------|
| ENSDARG0000079011  | 269.0853137 | -0.700217301 | 0.200520421 | -3.491999948 | 0.000479418 | 0.012661869 | col17a1b          | ZDB-GENE-030131-7145 | col17a1b          |
| ENSDARG00000102756 | 5.518823894 | 2.632024055  | 0.754125911 | 3.490165259  | 0.000482722 | 0.012730371 | nr0b2b            | ZDB-GENE-080403-9    | nr0b2b            |
| ENSDARG00000103542 | 47.5600161  | 0.714969131  | 0.204932546 | 3.488802272  | 0.00048519  | 0.012776667 | vegfaa            | ZDB-GENE-990415-273  | vegfaa            |
| ENSDARG0000008029  | 1145.093064 | 0.560866956  | 0.161006714 | 3.483500419  | 0.000494902 | 0.013013319 | mep1a.2           | ZDB-GENE-041001-208  | mep1a.2           |
| ENSDARG00000016231 | 119.999826  | 0.507514041  | 0.145756804 | 3.4819235    | 0.000497826 | 0.013071027 | bcap29            | ZDB-GENE-050522-468  | bcap29            |
| ENSDARG00000017953 | 8.622598385 | -1.018656962 | 0.292662298 | -3.480656607 | 0.000500186 | 0.013113803 | tp73              | ZDB-GENE-030814-2    | tp73              |
| ENSDARG00000032619 | 799.8746877 | -0.376258315 | 0.108135502 | -3.479507724 | 0.000502336 | 0.013140592 | tob1a             | ZDB-GENE-031030-4    | tob1a             |
| ENSDARG00000091136 | 603.1109635 | 1.05528922   | 0.303302629 | 3.479327635  | 0.000502674 | 0.013140592 | zgc:174259        | ZDB-GENE-080213-10   | zgc:174259        |
| ENSDARG00000014717 | 441.6477244 | -0.384820359 | 0.110657841 | -3.477569736 | 0.000505981 | 0.013207809 | dync1h1           | ZDB-GENE-030131-7050 | dync1h1           |
| ENSDARG00000086483 | 4.217360412 | 2.583791451  | 0.743321706 | 3.476006997  | 0.000508939 | 0.013265702 | si:ch211-132p1.4  | ZDB-GENE-141222-68   | si:ch211-132p1.4  |
| ENSDARG00000041644 | 379.33045   | -0.47809507  | 0.137921292 | -3.46643409  | 0.000527411 | 0.013727231 | si:dkey-194e6.1   | ZDB-GENE-100922-43   | si:dkey-194e6.1   |
| ENSDARG00000075164 | 125.0590006 | 0.424804615  | 0.122684093 | 3.462589202  | 0.000535005 | 0.01390469  | mylk5             | ZDB-GENE-050309-74   | mylk5             |
| ENSDARG00000068638 | 9.714433096 | 1.102433613  | 0.318526895 | 3.461037766  | 0.000538097 | 0.013964832 | lpar5b            | ZDB-GENE-081022-116  | lpar5b            |
| ENSDARG00000112575 | 43.94659766 | -0.916194082 | 0.26484735  | -3.459328861 | 0.000541523 | 0.014031453 | CU467905.1        |                      |                   |
| ENSDARG00000100518 | 43.25512916 | 0.550265851  | 0.159099875 | 3.458618997  | 0.000542952 | 0.014031453 | CR387919.1        |                      |                   |
| ENSDARG00000059610 | 67.30614306 | -0.460124844 | 0.13303829  | -3.458589581 | 0.000543012 | 0.014031453 | gpr146            | ZDB-GENE-050823-3    | gpr146            |
| ENSDARG00000034063 | 24.74803101 | 0.902264064  | 0.261001329 | 3.456932834  | 0.000546361 | 0.014097686 | unm_sa911         | ZDB-GENE-120727-3    | unm_sa911         |
| ENSDARG00000013841 | 77.82676265 | -0.3806611   | 0.110201179 | -3.454237997 | 0.00055185  | 0.014218863 | abl2              | ZDB-GENE-020809-2    | abl2              |
| ENSDARG00000002634 | 11.71274907 | 1.024542881  | 0.29666079  | 3.453583742  | 0.000553191 | 0.014232949 | b4galt1           | ZDB-GENE-050417-236  | b4galt1           |
| ENSDARG00000074341 | 104.5949164 | 0.63347006   | 0.183606876 | 3.450143437  | 0.000560289 | 0.014394926 | hykk.2            | ZDB-GENE-080204-31   | hykk.2            |
| ENSDARG00000095048 | 143.3485241 | 1.089447191  | 0.316014311 | 3.447461567  | 0.000565881 | 0.0145178   | si:dkey-250k15.7  | ZDB-GENE-100921-33   | si:dkey-250k15.7  |
| ENSDARG00000074540 | 3.917507087 | -1.536340589 | 0.446112074 | -3.443844445 | 0.000573506 | 0.014692393 | gpr63             | ZDB-GENE-110411-183  | gpr63             |
| ENSDARG00000093173 | 12.16509252 | 2.821186975  | 0.819485292 | 3.442632836  | 0.000576081 | 0.014737315 | si:dkey-93m18.6   | ZDB-GENE-091204-133  | si:dkey-93m18.6   |
| ENSDARG00000074995 | 89.5865443  | -0.355855715 | 0.10343286  | -3.440451263 | 0.000580745 | 0.014835471 | eif2b5            | ZDB-GENE-030131-5364 | eif2b5            |
| ENSDARG00000098597 | 6.26774522  | -1.247215114 | 0.362673204 | -3.438950275 | 0.000583974 | 0.014896749 | CU570791.1        |                      |                   |
| ENSDARG00000058160 | 8.687620126 | 1.691362453  | 0.492705276 | 3.432807677  | 0.000597366 | 0.015216703 | tnfaip2b          | ZDB-GENE-081107-56   | tnfaip2b          |
| ENSDARG00000069934 | 207.599765  | 0.438132525  | 0.127788847 | 3.428566236  | 0.000606778 | 0.01543455  | parp4             | ZDB-GENE-070912-387  | parp4             |
| ENSDARG00000009544 | 107.0205051 | -0.637263213 | 0.186018096 | -3.425813005 | 0.000612962 | 0.015569761 | cldnb             | ZDB-GENE-010328-2    | cldnb             |
| ENSDARG00000077298 | 98.89225758 | 0.381148633  | 0.111296552 | 3.424622118  | 0.000615655 | 0.01559269  | gas1a             | ZDB-GENE-050302-155  | gas1a             |
| ENSDARG00000045898 | 61.12533875 | -0.651135521 | 0.190148345 | -3.424355453 | 0.00061626  | 0.01559269  | si:ch211-152c2.3  | ZDB-GENE-030131-9914 | si:ch211-152c2.3  |
| ENSDARG00000068064 | 105.1351267 | -0.55282357  | 0.161443167 | -3.424261188 | 0.000616473 | 0.01559269  | sirt1             | ZDB-GENE-070801-2    | sirt1             |
| ENSDARG00000103286 | 10.42773856 | -0.92893273  | 0.271653933 | -3.419544569 | 0.000627261 | 0.015825607 | kcnk4a            | ZDB-GENE-141211-80   | kcnk4a            |
| ENSDARG00000038075 | 604.1507015 | -0.318942352 | 0.093272623 | -3.419463722 | 0.000627447 | 0.015825607 | cyc1              | ZDB-GENE-031105-2    | cyc1              |
| ENSDARG00000019949 | 291.0813229 | 0.581816443  | 0.170252424 | 3.417375375  | 0.00063228  | 0.015906959 | serpinh1b         | ZDB-GENE-990415-93   | serpinh1b         |
| ENSDARG00000012341 | 48.25166645 | -0.749543915 | 0.2193378   | -3.417303879 | 0.000632446 | 0.015906959 | capn9             | ZDB-GENE-010724-2    | capn9             |
| ENSDARG00000056773 | 14.06904243 | -2.692399136 | 0.788123902 | -3.416213019 | 0.000634986 | 0.015934884 | zgc:163079        | ZDB-GENE-030131-7428 | zgc:163079        |
| ENSDARG00000087186 | 120.2696626 | -0.532764559 | 0.155958614 | -3.416063689 | 0.000635334 | 0.015934884 | si:ch211-232b12.5 | ZDB-GENE-031002-40   | si:ch211-232b12.5 |
| ENSDARG00000044525 | 46.04915397 | -0.575494291 | 0.168505337 | -3.415288202 | 0.000637146 | 0.015958005 | pparda            | ZDB-GENE-990415-212  | pparda            |
| ENSDARG00000039493 | 55.96889196 | -0.425562574 | 0.12471059  | -3.412401251 | 0.000643933 | 0.016105498 | naa20             | ZDB-GENE-050327-47   | naa20             |
| ENSDARG00000074660 | 69.53282843 | 0.48629483   | 0.142551657 | 3.41135867   | 0.0006464   | 0.016144696 | rilp              | ZDB-GENE-100408-4    | rilp              |
| ENSDARG00000105644 | 352.9377829 | 0.629509775  | 0.184597884 | 3.41016788   | 0.000649229 | 0.016192801 | zgc:172079        | ZDB-GENE-080204-103  | zgc:172079        |
| ENSDARG00000040884 | 152.3028854 | -0.534791803 | 0.156895673 | -3.408582241 | 0.000653014 | 0.016264583 | mxi1              | ZDB-GENE-990415-151  | mxi1              |
| ENSDARG00000042837 | 241.5613736 | -0.37251531  | 0.109321188 | -3.407530735 | 0.000655535 | 0.016304735 | atp1b3b           | ZDB-GENE-001127-1    | atp1b3b           |
| ENSDARG00000017891 | 733.1365847 | -0.329918261 | 0.09683247  | -3.407103637 | 0.000656562 | 0.016307652 | tcp1              | ZDB-GENE-990714-24   | tcp1              |
| ENSDARG00000012981 | 35.31998732 | -0.872391796 | 0.256134577 | -3.405989948 | 0.000659246 | 0.016351673 | osbpl7            | ZDB-GENE-041010-212  | osbpl7            |
| ENSDARG00000100498 | 131.2553359 | 0.734032558  | 0.215538975 | 3.405567645  | 0.000660267 | 0.016354364 | CABZ01079251.1    |                      |                   |
| ENSDARG00000002362 | 74.519701   | -0.483570822 | 0.142106924 | -3.40286601  | 0.00066683  | 0.016494149 | ubald1a           | ZDB-GENE-040718-191  | ubald1a           |
| ENSDARG00000077180 | 50.70277329 | -0.647343542 | 0.190259163 | -3.402430299 | 0.000667894 | 0.016497715 | slc37a4b          | ZDB-GENE-040426-827  | slc37a4b          |
| ENSDARG00000101886 | 146.6613043 | 0.393154695  | 0.115649945 | 3.399523395  | 0.000675034 | 0.016651149 | pdxdc1            | ZDB-GENE-040912-16   | pdxdc1            |

|                    |             |              |             |              |             |             |                   |                      |                   |
|--------------------|-------------|--------------|-------------|--------------|-------------|-------------|-------------------|----------------------|-------------------|
| ENSDARG00000036588 | 2040.022341 | 0.469420136  | 0.138114722 | 3.398769722  | 0.000676897 | 0.016674163 | mhc1zba           | ZDB-GENE-040426-2149 | mhc1zba           |
| ENSDARG00000032856 | 20.17809364 | -0.705875874 | 0.207728359 | -3.398071774 | 0.000678626 | 0.016693831 | ccdc120           | ZDB-GENE-061027-93   | ccdc120           |
| ENSDARG00000098903 | 44.59199832 | 0.537723311  | 0.158316484 | 3.39650866   | 0.000682514 | 0.01676647  | tfe3a             | ZDB-GENE-010919-2    | tfe3a             |
| ENSDARG00000036414 | 495.7396749 | -0.490665841 | 0.144685555 | -3.391256592 | 0.000695729 | 0.017044732 | si:ch73-335 21.1  | ZDB-GENE-130530-591  | si:ch73-335 21.1  |
| ENSDARG00000071566 | 69.91951125 | 0.453908503  | 0.133846899 | 3.391251536  | 0.000695742 | 0.017044732 | ppp1cab           | ZDB-GENE-030131-5512 | ppp1cab           |
| ENSDARG00000088124 | 57.20846269 | -0.484391152 | 0.142938581 | -3.388806213 | 0.000701976 | 0.017136624 | adrb2a            | ZDB-GENE-100414-3    | adrb2a            |
| ENSDARG00000024789 | 35.87963608 | 1.327402274  | 0.391702031 | 3.388806207  | 0.000701976 | 0.017136624 | mxo               | ZDB-GENE-030721-7    | mxo               |
| ENSDARG00000089302 | 185.4494855 | 0.310431867  | 0.091609133 | 3.388656317  | 0.00070236  | 0.017136624 | hnrnpa0a          | ZDB-GENE-030131-2249 | hnrnpa0a          |
| ENSDARG00000043185 | 66.35572495 | 0.444516947  | 0.131203878 | 3.387986339  | 0.000704078 | 0.017155198 | mlt1a             | ZDB-GENE-081105-45   | mlt1a             |
| ENSDARG00000020956 | 1841.84982  | -0.410453917 | 0.121336506 | -3.382773505 | 0.000717578 | 0.017460412 | pck2              | ZDB-GENE-040426-2266 | pck2              |
| ENSDARG00000017165 | 264.2338311 | 0.657507638  | 0.194448995 | 3.381388722  | 0.000721204 | 0.017524875 | slc3a1            | ZDB-GENE-090313-225  | slc3a1            |
| ENSDARG00000063079 | 39.58337459 | 0.843760786  | 0.249666746 | 3.379548128  | 0.000726051 | 0.017618771 | ago3b             | ZDB-GENE-060503-452  | ago3b             |
| ENSDARG00000086457 | 90.41412131 | 0.427106666  | 0.126400136 | 3.379004793  | 0.000727487 | 0.017629772 | tnfaipl81         | ZDB-GENE-040426-695  | tnfaipl81         |
| ENSDARG00000056836 | 305.2568583 | -0.772910032 | 0.228770541 | -3.37853829  | 0.000728723 | 0.017631994 | si:ch211-125o16.4 | ZDB-GENE-131120-100  | si:ch211-125o16.4 |
| ENSDARG00000101272 | 6.287256388 | 1.448414343  | 0.428749724 | 3.37822805   | 0.000729546 | 0.017631994 | si:dkey-29j8.1    | ZDB-GENE-110913-11   | si:dkey-29j8.1    |
| ENSDARG00000105411 | 549.7424286 | -0.707592795 | 0.209602733 | -3.375875801 | 0.000735811 | 0.017759493 | si:ch211-113d11.5 | ZDB-GENE-030131-6391 | si:ch211-113d11.5 |
| ENSDARG00000053366 | 18.48068687 | 1.069692915  | 0.317032853 | 3.374075922  | 0.000740639 | 0.017851997 | ftr12             | ZDB-GENE-070912-196  | ftr12             |
| ENSDARG00000089162 | 49.79408341 | 0.486462659  | 0.144233227 | 3.372750287  | 0.000744214 | 0.017914083 | afap11a           | ZDB-GENE-050913-76   | afap11a           |
| ENSDARG00000016132 | 156.1213738 | -0.414815791 | 0.123010401 | -3.372200936 | 0.0007457   | 0.017925794 | keap1a            | ZDB-GENE-030131-556  | keap1a            |
| ENSDARG00000000229 | 58.0678167  | 0.507758934  | 0.150691376 | 3.369528807  | 0.000752968 | 0.018062092 | usp49             | ZDB-GENE-050208-484  | usp49             |
| ENSDARG00000016483 | 165.8811691 | 0.485583178  | 0.144116629 | 3.369376468  | 0.000753385 | 0.018062092 | baiapl22a         | ZDB-GENE-040108-10   | baiapl22a         |
| ENSDARG00000058593 | 225.6298538 | 0.438097205  | 0.130043791 | 3.368843696  | 0.000754842 | 0.018072878 | sri               | ZDB-GENE-040426-1356 | sri               |
| ENSDARG00000103589 | 163.6625874 | 0.564651216  | 0.167660147 | 3.367832054  | 0.000757617 | 0.018115135 | gata6             | ZDB-GENE-000622-1    | gata6             |
| ENSDARG00000061576 | 16.43763732 | -0.821742096 | 0.244189822 | -3.365177507 | 0.000764944 | 0.018265974 | gldn              | ZDB-GENE-050119-4    | gldn              |
| ENSDARG00000020976 | 55.81122975 | -0.609030243 | 0.181213594 | -3.360841918 | 0.000777053 | 0.018530437 | ubald1b           | ZDB-GENE-050522-446  | ubald1b           |
| ENSDARG00000009196 | 26.75936947 | -1.11808901  | 0.332870814 | -3.358927737 | 0.000782455 | 0.018634489 | anxa3a            | ZDB-GENE-040912-58   | anxa3a            |
| ENSDARG00000035552 | 34.76997112 | -0.544948776 | 0.162385124 | -3.355903322 | 0.000791062 | 0.01881448  | agtr2             | ZDB-GENE-050306-56   | agtr2             |
| ENSDARG00000088143 | 28.23116915 | -0.832100457 | 0.248023856 | -3.354921061 | 0.000793876 | 0.018856403 | sema4gb           | ZDB-GENE-111117-1    | sema4gb           |
| ENSDARG00000015563 | 91.45562991 | 0.453433334  | 0.13536719  | 3.349654634  | 0.000809124 | 0.019189136 | zgc:123305        | ZDB-GENE-051120-171  | zgc:123305        |
| ENSDARG00000059906 | 223.7100644 | 0.355587904  | 0.10616636  | 3.349346291  | 0.000810025 | 0.019189136 | sdc4              | ZDB-GENE-061111-1    | sdc4              |
| ENSDARG00000004658 | 130.6033002 | -0.608271827 | 0.181708343 | -3.347517335 | 0.000815389 | 0.019271041 | zgc:101810        | ZDB-GENE-041121-7    | zgc:101810        |
| ENSDARG00000038012 | 24.55188894 | 0.80923206   | 0.241746917 | 3.347434872  | 0.000815632 | 0.019271041 | fam83fa           | ZDB-GENE-090624-5    | fam83fa           |
| ENSDARG00000097571 | 65.8310033  | 1.521710559  | 0.45473191  | 3.346390536  | 0.00081871  | 0.019318324 | si:dkey-114 24.2  | ZDB-GENE-131121-512  | si:dkey-114 24.2  |
| ENSDARG00000040565 | 18352.84411 | -0.587365847 | 0.175553759 | -3.345789073 | 0.000820488 | 0.019334834 | ckmb              | ZDB-GENE-040426-2128 | ckmb              |
| ENSDARG00000099717 | 9.223042743 | 1.079999501  | 0.323067612 | 3.342951946  | 0.000828923 | 0.019507963 | si:rp71-1h20.9    | ZDB-GENE-131127-386  | si:rp71-1h20.9    |
| ENSDARG00000062467 | 38.76188981 | -0.676024372 | 0.202345751 | -3.340936827 | 0.000834962 | 0.019624347 | stra6l            | ZDB-GENE-070410-116  | stra6l            |
| ENSDARG00000063412 | 528.5841362 | 0.584932719  | 0.17518008  | 3.339036724  | 0.000840694 | 0.019733213 | cers1             | ZDB-GENE-050208-406  | cers1             |
| ENSDARG00000093957 | 13.40271049 | 1.202122708  | 0.360310766 | 3.336349678  | 0.000848863 | 0.019880559 | si:dkey-251i10.2  | ZDB-GENE-050506-102  | si:dkey-251i10.2  |
| ENSDARG00000061424 | 146.5185276 | 0.2966343    | 0.088912679 | 3.336242977  | 0.000849189 | 0.019880559 | znf646            | ZDB-GENE-160627-3    | znf646            |
| ENSDARG00000003961 | 104.7549529 | 0.543841564  | 0.163075423 | 3.334908184  | 0.000853276 | 0.019950186 | parp3             | ZDB-GENE-030131-7435 | parp3             |
| ENSDARG00000045415 | 60.88499741 | 0.651189693  | 0.195311637 | 3.334105958  | 0.000855741 | 0.019981764 | gnal              | ZDB-GENE-041114-26   | gnal              |
| ENSDARG00000000568 | 195.5971822 | -0.399189905 | 0.119858847 | -3.330500116 | 0.000866901 | 0.020216048 | ell               | ZDB-GENE-030131-3946 | ell               |
| ENSDARG00000016016 | 317.3360226 | 0.29268014   | 0.087928762 | 3.328605254  | 0.00087282  | 0.020310503 | dbnlb             | ZDB-GENE-050522-293  | dbnlb             |
| ENSDARG00000099499 | 825.1294757 | -0.389423558 | 0.117004972 | -3.328265038 | 0.000873887 | 0.020310503 | ndufa4l           | ZDB-GENE-040426-2756 | ndufa4l           |
| ENSDARG00000096242 | 119.2788914 | -0.583882994 | 0.175439411 | -3.328117614 | 0.000874349 | 0.020310503 | si:ch211-76 23.4  | ZDB-GENE-030131-8310 | si:ch211-76 23.4  |
| ENSDARG00000003952 | 3065.456785 | 0.270190083  | 0.081290557 | 3.323757302  | 0.000888135 | 0.020576978 | pfn2              | ZDB-GENE-040115-4    | pfn2              |
| ENSDARG00000018149 | 2242.934378 | -0.535496833 | 0.161135201 | -3.323276543 | 0.000889667 | 0.020576978 | slc38a4           | ZDB-GENE-041010-14   | slc38a4           |
| ENSDARG00000039393 | 618.860793  | -0.870624474 | 0.261985769 | -3.323174677 | 0.000889992 | 0.020576978 | si:ch211-240 19.5 | ZDB-GENE-041210-327  | si:ch211-240 19.5 |
| ENSDARG00000076239 | 93.4469963  | 0.548199235  | 0.164969028 | 3.323043371  | 0.000890411 | 0.020576978 | si:ch211-74f19.2  | ZDB-GENE-160114-78   | si:ch211-74f19.2  |



|                    |             |              |             |              |             |             |                   |                      |                   |
|--------------------|-------------|--------------|-------------|--------------|-------------|-------------|-------------------|----------------------|-------------------|
| ENSDARG0000087243  | 487.7680211 | 0.313445996  | 0.094341196 | 3.322472131  | 0.000892236 | 0.020581964 | zgc:100918        | ZDB-GENE-040927-2    | zgc:100918        |
| ENSDARG0000058571  | 15.06086728 | 0.901386393  | 0.271317422 | 3.322257692  | 0.000892922 | 0.020581964 | pdp2              | ZDB-GENE-000921-2    | pdp2              |
| ENSDARG0000099351  | 242.7981587 | -1.278599034 | 0.385070518 | -3.320428275 | 0.000898795 | 0.020690734 | igfbp1a           | ZDB-GENE-021231-1    | igfbp1a           |
| ENSDARG00000101675 | 29.86891742 | 0.753660151  | 0.227022986 | 3.319752607  | 0.000900973 | 0.020714282 | zgc:123107        | ZDB-GENE-051113-192  | zgc:123107        |
| ENSDARG00000026137 | 73.78030629 | 0.469874818  | 0.141628964 | 3.317646376  | 0.000907793 | 0.020844377 | sfxn5b            | ZDB-GENE-050706-107  | sfxn5b            |
| ENSDARG00000020054 | 120.587687  | 0.496112468  | 0.149612317 | 3.315986789  | 0.000913201 | 0.020935941 | aox6              | ZDB-GENE-050208-742  | aox6              |
| ENSDARG00000027600 | 133.7848664 | -0.437170087 | 0.131861457 | -3.31537431  | 0.000915205 | 0.020935941 | pdlim5b           | ZDB-GENE-040426-908  | pdlim5b           |
| ENSDARG00000030110 | 47.98595101 | 0.575001719  | 0.173436187 | 3.315350316  | 0.000915283 | 0.020935941 | myod1             | ZDB-GENE-980526-561  | myod1             |
| ENSDARG00000036628 | 344.1066414 | 0.503491646  | 0.151951927 | 3.31349299   | 0.000921384 | 0.021026793 | cd74b             | ZDB-GENE-990910-10   | cd74b             |
| ENSDARG00000036420 | 17.89978257 | 0.906517758  | 0.273589144 | 3.313427374  | 0.0009216   | 0.021026793 | si:dkey-33c9.6    | ZDB-GENE-130530-592  | si:dkey-33c9.6    |
| ENSDARG00000012426 | 112.1995771 | -0.473347924 | 0.142884769 | -3.312794821 | 0.000923687 | 0.021047626 | neflb             | ZDB-GENE-060312-44   | neflb             |
| ENSDARG00000067566 | 67.951501   | 0.739488729  | 0.223469612 | 3.309124326  | 0.000935883 | 0.021298457 | sftppb            | ZDB-GENE-060526-155  | sftppb            |
| ENSDARG00000090783 | 11.58483664 | 1.043068776  | 0.316200531 | 3.298757193  | 0.000971139 | 0.022072789 | mfap4             | ZDB-GENE-040426-2246 | mfap4             |
| ENSDARG00000055290 | 120.5036418 | 0.641705479  | 0.194589841 | 3.297733717  | 0.000974685 | 0.022125354 | mpeg1.1           | ZDB-GENE-030131-7347 | mpeg1.1           |
| ENSDARG00000101181 | 47.7050235  | -0.629084217 | 0.190842118 | -3.296359443 | 0.000979466 | 0.022205772 | s100w             | ZDB-GENE-080407-2    | s100w             |
| ENSDARG00000005799 | 113.8297985 | -0.367865095 | 0.111695386 | -3.293467236 | 0.000989599 | 0.022407165 | smim14            | ZDB-GENE-040426-22   | smim14            |
| ENSDARG00000056725 | 305.5644085 | 0.508690175  | 0.15460544  | 3.290247581  | 0.001000993 | 0.022636572 | hmgb3a            | ZDB-GENE-050428-1    | hmgb3a            |
| ENSDARG00000006120 | 107.7753953 | 0.42731373   | 0.129915936 | 3.289155611  | 0.001004884 | 0.022695962 | tbx2b             | ZDB-GENE-990726-27   | tbx2b             |
| ENSDARG00000028386 | 90.19842596 | 0.647997841  | 0.197045242 | 3.288573911  | 0.001006963 | 0.022714308 | htatip2           | ZDB-GENE-001219-1    | htatip2           |
| ENSDARG00000079972 | 18.69599841 | 0.999731769  | 0.304147823 | 3.286993012  | 0.001012633 | 0.022813512 | nfatc2b           | ZDB-GENE-120913-5    | nfatc2b           |
| ENSDARG00000031138 | 6.833853044 | -1.27398156  | 0.387842852 | -3.284788041 | 0.001020591 | 0.022963942 | irx3b             | ZDB-GENE-030131-525  | irx3b             |
| ENSDARG00000003375 | 62.13190236 | 0.464455463  | 0.141544928 | 3.281328888  | 0.001033192 | 0.023218334 | gng12a            | ZDB-GENE-040426-2555 | gng12a            |
| ENSDARG00000089602 | 28.44771863 | 0.82116925   | 0.250718005 | 3.275270359  | 0.001055609 | 0.023672891 | si:dkey-217f16.1  | ZDB-GENE-091116-95   | si:dkey-217f16.1  |
| ENSDARG00000094695 | 177.6418553 | 0.363665115  | 0.111037702 | 3.275149859  | 0.001056059 | 0.023672891 | si:dkey-204f11.64 | ZDB-GENE-030131-8332 | si:dkey-204f11.64 |
| ENSDARG00000091211 | 2687.150625 | 0.503618405  | 0.153819777 | 3.274080963  | 0.001060062 | 0.023732956 | adh8a             | ZDB-GENE-030529-3    | adh8a             |
| ENSDARG00000090834 | 18.90650628 | -0.917761065 | 0.280868657 | -3.267580926 | 0.001084709 | 0.024197173 | epor              | ZDB-GENE-071116-1    | epor              |
| ENSDARG00000056929 | 372.8878709 | 0.301835965  | 0.092374237 | 3.267534055  | 0.001084888 | 0.024197173 | kdm6bb            | ZDB-GENE-040724-166  | kdm6bb            |
| ENSDARG00000079647 | 973.791677  | 0.593485656  | 0.18163416  | 3.267478199  | 0.001085102 | 0.024197173 | muc13b            | ZDB-GENE-080220-61   | muc13b            |
| ENSDARG00000035471 | 46.71561867 | -0.493009014 | 0.150896794 | -3.267193425 | 0.001086194 | 0.024197173 | si:dkey-220k22.1  | ZDB-GENE-060526-255  | si:dkey-220k22.1  |
| ENSDARG00000088044 | 69.61253592 | 0.572891885  | 0.1753831   | 3.266517046  | 0.001088793 | 0.024224958 | si:ch73-139j3.4   | ZDB-GENE-140106-202  | si:ch73-139j3.4   |
| ENSDARG00000053232 | 120.1468647 | 0.425948732  | 0.130465245 | 3.264844457  | 0.001095242 | 0.024338259 | itgb1b.1          | ZDB-GENE-060803-3    | itgb1b.1          |
| ENSDARG00000023814 | 101.2731683 | 0.34785529   | 0.106557885 | 3.264472562  | 0.001096681 | 0.024340071 | dyrk1ab           | ZDB-GENE-030131-5677 | dyrk1ab           |
| ENSDARG00000035751 | 791.1918886 | -0.364568741 | 0.111711204 | -3.263493086 | 0.001100479 | 0.024394171 | ipo7              | ZDB-GENE-030131-458  | ipo7              |
| ENSDARG00000086746 | 319.7766715 | -0.742248689 | 0.227533816 | -3.262146709 | 0.001105719 | 0.024480073 | prodha            | ZDB-GENE-041008-73   | prodha            |
| ENSDARG00000016866 | 206.5357009 | 0.464890244  | 0.14263031  | 3.259407096  | 0.001116453 | 0.024687249 | fam102ab          | ZDB-GENE-060929-412  | fam102ab          |
| ENSDARG00000074644 | 5.208173802 | -1.272109927 | 0.390530962 | -3.257385585 | 0.001124436 | 0.024808106 | spock1            | ZDB-GENE-110428-1    | spock1            |
| ENSDARG0000007302  | 113.1051666 | 0.46650239   | 0.14321652  | 3.257322491  | 0.001124686 | 0.024808106 | sh3gl3b           | ZDB-GENE-040121-4    | sh3gl3b           |
| ENSDARG00000096738 | 6.256379796 | -1.541402214 | 0.47331398  | -3.256616704 | 0.001127486 | 0.024839314 | si:zfos-911d5.4   | ZDB-GENE-130603-14   | si:zfos-911d5.4   |
| ENSDARG00000104864 | 16.94593835 | -0.686770055 | 0.210938334 | -3.255785909 | 0.00113079  | 0.024881538 | klhdc2            | ZDB-GENE-070410-69   | klhdc2            |
| ENSDARG00000092976 | 427.3857406 | 0.729860102  | 0.224214184 | 3.255191484  | 0.001133159 | 0.024886264 | si:ch211-127i16.2 | ZDB-GENE-091204-54   | si:ch211-127i16.2 |
| ENSDARG00000013161 | 168.0699739 | 0.379477174  | 0.116581561 | 3.255035975  | 0.00113378  | 0.024886264 | zgc:55558         | ZDB-GENE-040426-740  | zgc:55558         |
| ENSDARG00000012432 | 63.96144938 | 0.450756236  | 0.138516023 | 3.254181181  | 0.001137197 | 0.024930756 | fam76b            | ZDB-GENE-030131-6955 | fam76b            |
| ENSDARG00000099609 | 21.25019865 | 0.742062035  | 0.228295213 | 3.250449392  | 0.001152228 | 0.025225042 | tpbga             | ZDB-GENE-030827-4    | tpbga             |
| ENSDARG00000030872 | 116.6550391 | -0.979297682 | 0.301308288 | -3.25015182  | 0.001153434 | 0.025225042 | cetp              | ZDB-GENE-041114-54   | cetp              |
| ENSDARG00000013771 | 88.07639247 | 0.709614639  | 0.218382262 | 3.24941519   | 0.001156426 | 0.025259658 | ctss2.2           | ZDB-GENE-050626-55   | ctss2.2           |
| ENSDARG00000028173 | 100.8387394 | -0.58656066  | 0.18053596  | -3.248996258 | 0.00115813  | 0.025266114 | slc4a2a           | ZDB-GENE-051101-2    | slc4a2a           |
| ENSDARG00000077967 | 64.64694411 | -0.362798571 | 0.111705149 | -3.24782316  | 0.001162915 | 0.02532784  | si:ch211-140m22.7 | ZDB-GENE-070912-73   | si:ch211-140m22.7 |
| ENSDARG00000071462 | 124.523745  | 0.586655933  | 0.180642324 | 3.247610636  | 0.001163784 | 0.02532784  | lama3             | ZDB-GENE-050208-475  | lama3             |
| ENSDARG00000055723 | 11.43412603 | 1.43464763   | 0.441871244 | 3.246754906  | 0.001167289 | 0.025359965 | hsp70l            | ZDB-GENE-050321-1    | hsp70l            |

|                    |             |              |             |              |             |             |                    |                      |                    |
|--------------------|-------------|--------------|-------------|--------------|-------------|-------------|--------------------|----------------------|--------------------|
| ENSDARG0000058332  | 153.1587992 | 0.628390419  | 0.193555773 | 3.246559933  | 0.001168089 | 0.025359965 | krt18a.2           | ZDB-GENE-090312-205  | krt18a.2           |
| ENSDARG0000045015  | 126.3802921 | 1.566073906  | 0.483147725 | 3.241397663  | 0.001189451 | 0.025756838 | cyp27b1            | ZDB-GENE-111005-2    | cyp27b1            |
| ENSDARG0000063895  | 10317.81768 | -0.374443451 | 0.115523934 | -3.241262993 | 0.001190013 | 0.025756838 | mt-nd1             | ZDB-GENE-011205-7    | mt-nd1             |
| ENSDARG0000093748  | 32.41472466 | 1.537494529  | 0.474373713 | 3.241103981  | 0.001190677 | 0.025756838 | si:ch211-217k17.11 | ZDB-GENE-030131-8636 | si:ch211-217k17.11 |
| ENSDARG00000996110 | 75.26534518 | 0.581769065  | 0.179520696 | 3.240679647  | 0.001192451 | 0.025764127 | zgc:123278         | ZDB-GENE-051127-21   | zgc:123278         |
| ENSDARG00000101030 | 15.8623646  | 1.021033073  | 0.315223291 | 3.239078775  | 0.001199164 | 0.025877998 | si:ch73-158p21.3   | ZDB-GENE-030131-4747 | si:ch73-158p21.3   |
| ENSDARG0000054191  | 1571.583033 | -0.288492455 | 0.089094924 | -3.238034696 | 0.001203562 | 0.025941673 | pgk1               | ZDB-GENE-040426-2711 | pgk1               |
| ENSDARG00000013044 | 187.838707  | -0.366742498 | 0.113330707 | -3.236038218 | 0.001212012 | 0.026085355 | ndufv2             | ZDB-GENE-040426-1713 | ndufv2             |
| ENSDARG0000055118  | 175.969061  | -0.562673085 | 0.173891382 | -3.23577327  | 0.001213137 | 0.026085355 | mylipb             | ZDB-GENE-061027-67   | mylipb             |
| ENSDARG0000042106  | 5.20957931  | -1.213571591 | 0.375229256 | -3.234213672 | 0.001219782 | 0.026196819 | mxn2a              | ZDB-GENE-040415-1    | mxn2a              |
| ENSDARG00000100465 | 415.6300438 | 0.55591894   | 0.171977338 | 3.232512759  | 0.001227067 | 0.026291146 | clrn3              | ZDB-GENE-170623-3    | clrn3              |
| ENSDARG0000002336  | 147.9573465 | 0.443986294  | 0.137350595 | 3.232503616  | 0.001227106 | 0.026291146 | dlc                | ZDB-GENE-000125-4    | dlc                |
| ENSDARG00000099974 | 2270.543087 | -0.434733873 | 0.134549017 | -3.231044593 | 0.001233387 | 0.026394187 | ldb3b              | ZDB-GENE-030131-6032 | ldb3b              |
| ENSDARG00000116617 | 140.6580518 | -0.511547908 | 0.158349527 | -3.230498491 | 0.001235746 | 0.026413141 | spaca4l            | ZDB-GENE-101011-2    | spaca4l            |
| ENSDARG0000087641  | 52.46204428 | -0.515237698 | 0.15959833  | -3.228340165 | 0.001245108 | 0.02653481  | cdh26.2            | ZDB-GENE-100922-183  | cdh26.2            |
| ENSDARG00000101613 | 47.30131021 | -0.573172693 | 0.177544466 | -3.228333187 | 0.001245139 | 0.02653481  | si:dkey-238i5.2    | ZDB-GENE-030131-9718 | si:dkey-238i5.2    |
| ENSDARG0000061432  | 8.614062286 | 1.113159556  | 0.344859563 | 3.22786338   | 0.001247185 | 0.02653481  | zgc:194330         | ZDB-GENE-080722-3    | zgc:194330         |
| ENSDARG00000099739 | 17.63108153 | -0.626223846 | 0.194008047 | -3.227824086 | 0.001247357 | 0.02653481  | CABZ01072952.1     |                      |                    |
| ENSDARG00000030964 | 26.08226519 | 0.727849047  | 0.225682883 | 3.225096376  | 0.001259303 | 0.026757198 | pde12              | ZDB-GENE-060519-25   | pde12              |
| ENSDARG00000030608 | 58.66070875 | 0.457298082  | 0.141849126 | 3.223834328  | 0.001264866 | 0.026833911 | rhogd              | ZDB-GENE-040426-1504 | rhogd              |
| ENSDARG0000053447  | 97.03507812 | 0.463314793  | 0.143725943 | 3.223598897  | 0.001265906 | 0.026833911 | ppp4r2b            | ZDB-GENE-030131-3008 | ppp4r2b            |
| ENSDARG0000044797  | 10.66408443 | 1.569272126  | 0.48699592  | 3.222351691  | 0.00127143  | 0.026919184 | cd8a               | ZDB-GENE-060210-2    | cd8a               |
| ENSDARG0000063059  | 220.5366015 | 0.552776042  | 0.171746873 | 3.218550834  | 0.001288401 | 0.027226968 | abcg8              | ZDB-GENE-050517-41   | abcg8              |
| ENSDARG00000101388 | 7.965793013 | 1.050590275  | 0.326457315 | 3.218155106  | 0.00129018  | 0.027226968 | si:ch211-171l17.14 | ZDB-GENE-070912-153  | si:ch211-171l17.14 |
| ENSDARG0000044074  | 302.5958025 | -0.299766717 | 0.093150819 | -3.218079256 | 0.001290522 | 0.027226968 | loxl2b             | ZDB-GENE-050208-29   | loxl2b             |
| ENSDARG0000033182  | 83.66549514 | -0.552060354 | 0.171612056 | -3.216908922 | 0.001295797 | 0.027306149 | arl4ab             | ZDB-GENE-030219-167  | arl4ab             |
| ENSDARG00000996867 | 86.76972783 | 0.445742941  | 0.138580266 | 3.21649651   | 0.001297661 | 0.02731333  | clmn               | ZDB-GENE-131127-546  | clmn               |
| ENSDARG0000027612  | 26.0508942  | 0.611980419  | 0.190375365 | 3.214598796  | 0.00130627  | 0.027462288 | gatad1             | ZDB-GENE-050629-1    | gatad1             |
| ENSDARG00000039255 | 123.7881845 | -0.374321978 | 0.116563895 | -3.211302948 | 0.001321346 | 0.02774671  | klhl21             | ZDB-GENE-040426-2627 | klhl21             |
| ENSDARG00000030350 | 4.918087316 | 1.42027415   | 0.442370972 | 3.210595268  | 0.001324604 | 0.027782591 | mxn2b              | ZDB-GENE-040415-2    | mxn2b              |
| ENSDARG00000011609 | 136.4140357 | -0.456667093 | 0.142287694 | -3.209463017 | 0.001329832 | 0.02785966  | FOXK2              | ZDB-GENE-030131-5310 | si:ch211-262e15.1  |
| ENSDARG00000996722 | 45.85076249 | 0.549029261  | 0.171176235 | 3.207391844  | 0.001339444 | 0.028028299 | si:dkey-16i5.8     | ZDB-GENE-030131-1207 | si:dkey-16i5.8     |
| ENSDARG0000042033  | 9.775863727 | 0.936655369  | 0.292669364 | 3.200387481  | 0.001372429 | 0.028685055 | mettl11b           | ZDB-GENE-081104-175  | mettl11b           |
| ENSDARG00000076360 | 44.17016575 | -0.520247749 | 0.162651614 | -3.198540347 | 0.001381252 | 0.028835847 | rpl37              | ZDB-GENE-040625-39   | rpl37              |
| ENSDARG00000090638 | 10.34821118 | -1.031181303 | 0.322604302 | -3.196427626 | 0.001391407 | 0.029014078 | gp9                | ZDB-GENE-090313-5    | gp9                |
| ENSDARG00000010571 | 102.2789184 | 0.488615898  | 0.152911334 | 3.195419753  | 0.001396276 | 0.029081787 | ezh2               | ZDB-GENE-041111-259  | ezh2               |
| ENSDARG00000076830 | 215.6169605 | -1.356738854 | 0.424656366 | -3.19490996  | 0.001398745 | 0.029099407 | si:dkey-65b12.6    | ZDB-GENE-060526-329  | si:dkey-65b12.6    |
| ENSDARG00000098375 | 267.3144557 | -0.369204685 | 0.115630462 | -3.192970773 | 0.001408172 | 0.029259532 | polr1a             | ZDB-GENE-030131-5286 | polr1a             |
| ENSDARG00000029747 | 1166.127976 | 0.440526557  | 0.13798119  | 3.192656611  | 0.001409705 | 0.029259532 | mep1a.1            | ZDB-GENE-041001-209  | mep1a.1            |
| ENSDARG00000020364 | 2464.223774 | -0.428340608 | 0.134230687 | -3.191078122 | 0.001417429 | 0.029385853 | fbp1b              | ZDB-GENE-021206-11   | fbp1b              |
| ENSDARG00000004954 | 217.1004297 | 0.608605293  | 0.190796705 | 3.189810301  | 0.001423662 | 0.02944936  | grna               | ZDB-GENE-030131-8434 | grna               |
| ENSDARG0000055342  | 77.25562655 | -0.653916002 | 0.205003033 | -3.189786955 | 0.001423777 | 0.02944936  | slc16a13           | ZDB-GENE-120907-2    | slc16a13           |
| ENSDARG00000021195 | 150.6705259 | -0.397670824 | 0.124697841 | -3.189075451 | 0.001427286 | 0.029476255 | st8sia6            | ZDB-GENE-060322-9    | st8sia6            |
| ENSDARG0000099564  | 7.341359318 | 1.077182233  | 0.337795708 | 3.188857078  | 0.001428365 | 0.029476255 | atoh1b             | ZDB-GENE-041201-1    | atoh1b             |
| ENSDARG00000040277 | 14.51839707 | -1.040906948 | 0.326624891 | -3.186857388 | 0.001438277 | 0.029646686 | fbxo32             | ZDB-GENE-040426-1040 | fbxo32             |
| ENSDARG00000079703 | 92.76673721 | 0.738558546  | 0.231800268 | 3.18618504   | 0.001441624 | 0.029681557 | si:dkey-18p12.4    | ZDB-GENE-070912-408  | si:dkey-18p12.4    |
| ENSDARG0000060340  | 10.51320634 | -0.937022658 | 0.294142881 | -3.185603727 | 0.001444523 | 0.029707148 | si:dkey-157l19.2   | ZDB-GENE-090313-190  | si:dkey-157l19.2   |
| ENSDARG00000074161 | 287.3979261 | 0.222512337  | 0.069872974 | 3.184526497  | 0.00144991  | 0.029751795 | tnrc6b             | ZDB-GENE-030131-13   | tnrc6b             |
| ENSDARG00000005645 | 36.8130691  | -0.618384992 | 0.194185522 | -3.184506173 | 0.001450012 | 0.029751795 | robo3              | ZDB-GENE-000209-4    | robo3              |

|                     |             |              |             |              |             |             |                    |                      |                   |
|---------------------|-------------|--------------|-------------|--------------|-------------|-------------|--------------------|----------------------|-------------------|
| ENSDARG0000007774   | 57.22818059 | 0.509675262  | 0.160101349 | 3.183453885  | 0.001455293 | 0.029826021 | vash2              | ZDB-GENE-041014-355  | vash2             |
| ENSDARG00000090946  | 54.02791692 | 0.574728303  | 0.180695579 | 3.180643962  | 0.001469481 | 0.030082425 | si:zfos-364h11.2   | ZDB-GENE-120703-46   | si:zfos-364h11.2  |
| ENSDARG00000039931  | 279.5847421 | -0.367054858 | 0.11543834  | -3.17966161  | 0.001474471 | 0.030127998 | slc25a33           | ZDB-GENE-040426-2183 | slc25a33          |
| ENSDARG0000008948   | 77.72246385 | 1.985371515  | 0.624473804 | 3.179271094  | 0.001476459 | 0.030127998 | pla2g3             | ZDB-GENE-051113-96   | pla2g3            |
| ENSDARG00000009336  | 56.64834345 | 0.721898904  | 0.227068318 | 3.179214562  | 0.001476747 | 0.030127998 | aif1l              | ZDB-GENE-030131-9646 | aif1l             |
| ENSDARG00000069186  | 7.125194929 | 1.159996364  | 0.364992385 | 3.178138538  | 0.001482239 | 0.030205674 | cyp27a1.2          | ZDB-GENE-081104-511  | cyp27a1.2         |
| ENSDARG00000056089  | 103.3115195 | 0.318182027  | 0.100210111 | 3.175148932  | 0.001497596 | 0.030483986 | nrbp1              | ZDB-GENE-041001-146  | nrbp1             |
| ENSDARG000000102777 | 20.94237141 | -0.929651111 | 0.292877185 | -3.174201198 | 0.001502495 | 0.030537254 | thbs4a             | ZDB-GENE-080215-11   | thbs4a            |
| ENSDARG00000032919  | 211.5032937 | -0.308906956 | 0.097324667 | -3.173984195 | 0.001503619 | 0.030537254 | chchd3a            | ZDB-GENE-030131-5005 | chchd3a           |
| ENSDARG00000028259  | 99.59357576 | 0.381043757  | 0.120086115 | 3.173087551  | 0.00150827  | 0.030597072 | aldh3a2a           | ZDB-GENE-040718-74   | aldh3a2a          |
| ENSDARG00000079571  | 30.68931364 | 0.542236889  | 0.170934229 | 3.172196063  | 0.001512908 | 0.030656648 | mfsd4b             | ZDB-GENE-070410-26   | mfsd4b            |
| ENSDARG00000012458  | 276.323758  | -0.280898554 | 0.088593101 | -3.170659483 | 0.001520933 | 0.030784306 | zgc:77849          | ZDB-GENE-030131-1107 | zgc:77849         |
| ENSDARG00000013946  | 92.34589176 | -0.502235209 | 0.158484107 | -3.16899415  | 0.001529675 | 0.030895157 | ivns1abpb          | ZDB-GENE-030131-6266 | ivns1abpb         |
| ENSDARG00000015576  | 10.39051033 | 0.958640885  | 0.30250964  | 3.168959795  | 0.001529856 | 0.030895157 | itrip              | ZDB-GENE-050417-422  | itrip             |
| ENSDARG00000061472  | 185.8334484 | 0.437332257  | 0.138089205 | 3.167027125  | 0.00154006  | 0.03106624  | gba2               | ZDB-GENE-070522-3    | gba2              |
| ENSDARG00000013623  | 3238.876094 | -0.296390594 | 0.093704615 | -3.163030908 | 0.001561358 | 0.031460477 | vdac2              | ZDB-GENE-030131-845  | vdac2             |
| ENSDARG00000006760  | 35.83187636 | -0.695554363 | 0.219948312 | -3.162353717 | 0.001564993 | 0.031498347 | slc24a3            | ZDB-GENE-090312-67   | slc24a3           |
| ENSDARG00000097863  | 38.85495584 | 0.450601588  | 0.142539282 | 3.161244968  | 0.001570963 | 0.031583053 | si:dkeyp-84f3.9    | ZDB-GENE-131127-66   | si:dkeyp-84f3.9   |
| ENSDARG00000074526  | 38.01897527 | -1.312001642 | 0.415105075 | -3.160649485 | 0.001574178 | 0.031612246 | zbtb16b            | ZDB-GENE-100923-1    | zbtb16b           |
| ENSDARG00000040890  | 333.4751576 | 1.116735606  | 0.353368555 | 3.160257443  | 0.001576298 | 0.031619408 | fdps               | ZDB-GENE-050506-78   | fdps              |
| ENSDARG00000014348  | 128.8468632 | 0.334610428  | 0.105994128 | 3.156877029  | 0.001594686 | 0.031952515 | stk17b             | ZDB-GENE-040426-1499 | stk17b            |
| ENSDARG00000017115  | 96.68956891 | 0.323699211  | 0.102581322 | 3.155537513  | 0.001602027 | 0.032050811 | kctd10             | ZDB-GENE-040426-2843 | kctd10            |
| ENSDARG00000069734  | 26.05122144 | -2.682993805 | 0.850310446 | -3.155310884 | 0.001603272 | 0.032050811 | hbba2              | ZDB-GENE-040801-164  | hbba2             |
| ENSDARG00000092667  | 12.87327098 | 1.108926825  | 0.351481792 | 3.155005037  | 0.001604953 | 0.032050811 | si:ch211-271e10.2  | ZDB-GENE-060526-146  | si:ch211-271e10.2 |
| ENSDARG00000034307  | 175.5530068 | -0.440566216 | 0.139672061 | -3.154290209 | 0.00160889  | 0.032093688 | chrne              | ZDB-GENE-040808-32   | chrne             |
| ENSDARG00000075053  | 71.77404883 | 1.064190969  | 0.337541393 | 3.152771749  | 0.001617282 | 0.032225244 | SCCPDH (1 of many) | ZDB-GENE-080212-12   | zgc:174379        |
| ENSDARG00000105276  | 32.69249809 | 0.642427985  | 0.203801347 | 3.152226398  | 0.001620306 | 0.032249662 | grb2a              | ZDB-GENE-041121-1    | grb2a             |
| ENSDARG00000101334  | 505.7748168 | 0.328698503  | 0.104286503 | 3.151879602  | 0.001622231 | 0.032252192 | ctsc               | ZDB-GENE-030619-9    | ctsc              |
| ENSDARG00000038682  | 43.44583329 | 1.987098436  | 0.630651894 | 3.150864135  | 0.001627882 | 0.032293395 | zgc:171687         | ZDB-GENE-071004-9    | zgc:171687        |
| ENSDARG00000007842  | 6.079039296 | 2.160382621  | 0.685648578 | 3.150859914  | 0.001627905 | 0.032293395 | MCHR2 (1 of many)  | ZDB-GENE-100922-121  | si:dkey-165n16.5  |
| ENSDARG00000098112  | 25.39579247 | 0.576071081  | 0.182888252 | 3.149852847  | 0.001633527 | 0.032369108 | btc                | ZDB-GENE-050311-1    | btc               |
| ENSDARG00000060729  | 164.3427003 | 0.343697389  | 0.109128527 | 3.149473358  | 0.001633565 | 0.032375403 | trim8b             | ZDB-GENE-030131-4325 | trim8b            |
| ENSDARG00000088087  | 692.080737  | -0.369564825 | 0.117453221 | -3.14648523  | 0.001652456 | 0.0326543   | kdm6ba             | ZDB-GENE-091005-1    | kdm6ba            |
| ENSDARG00000077722  | 211.8810049 | -0.4717306   | 0.149930838 | -3.146321364 | 0.001653382 | 0.0326543   | ppp2r3a            | ZDB-GENE-070912-646  | ppp2r3a           |
| ENSDARG00000104314  | 23.11348495 | -0.609641719 | 0.193800753 | -3.145713883 | 0.00165682  | 0.032686197 | nrg1               | ZDB-GENE-050302-113  | nrg1              |
| ENSDARG00000104235  | 67.11315261 | 0.420756185  | 0.133796434 | 3.144748877  | 0.001662295 | 0.032758162 | myo5c              | ZDB-GENE-131127-196  | myo5c             |
| ENSDARG00000116259  | 199.7669157 | 0.949929901  | 0.302334765 | 3.141980383  | 0.001678093 | 0.033023365 | chia.6             | ZDB-GENE-030131-1140 | chia.6            |
| ENSDARG00000061885  | 158.5703192 | 0.453146535  | 0.144233969 | 3.141746269  | 0.001679435 | 0.033023365 | satb2              | ZDB-GENE-070912-212  | satb2             |
| ENSDARG00000056414  | 100.886566  | 0.384106134  | 0.122304373 | 3.140575642  | 0.001686162 | 0.033119316 | usp1               | ZDB-GENE-030131-726  | usp1              |
| ENSDARG00000010610  | 21.54003487 | -0.778727651 | 0.24819178  | -3.137604524 | 0.001703345 | 0.033420231 | sarm1              | ZDB-GENE-040219-1    | sarm1             |
| ENSDARG00000104823  | 134.7464006 | -0.542512812 | 0.172968287 | -3.136487174 | 0.001709849 | 0.033511175 | znf648             | ZDB-GENE-120215-149  | znf648            |
| ENSDARG00000042684  | 1398.716342 | -0.39335032  | 0.125453418 | -3.135429282 | 0.001716028 | 0.033595556 | serpinc1           | ZDB-GENE-030131-264  | serpinc1          |
| ENSDARG00000033544  | 29.77001568 | -0.680378393 | 0.217068631 | -3.134392976 | 0.001722101 | 0.033677677 | adamts15b          | ZDB-GENE-070814-5    | adamts15b         |
| ENSDARG00000007494  | 57.28105875 | 0.486155089  | 0.155161165 | 3.133226606  | 0.001728959 | 0.03377497  | st3gal8            | ZDB-GENE-050417-286  | st3gal8           |
| ENSDARG00000054288  | 69.45280502 | -0.58389491  | 0.186577181 | -3.129508698 | 0.001750989 | 0.034161518 | zgc:63972          | ZDB-GENE-040426-1320 | zgc:63972         |
| ENSDARG00000044811  | 93.10199102 | 0.34455068   | 0.110106622 | 3.129245767  | 0.001752557 | 0.034161518 | cdk9               | ZDB-GENE-030131-321  | cdk9              |
| ENSDARG00000116833  | 41.11459397 | 0.630250047  | 0.201507881 | 3.127669476  | 0.001761982 | 0.034307952 | CABZ01077220.2     |                      |                   |
| ENSDARG00000038235  | 4.833055543 | -1.074340398 | 0.343812306 | -3.124787501 | 0.001779335 | 0.03457107  | pkdccb             | ZDB-GENE-130530-599  | pkdccb            |
| ENSDARG00000042123  | 16.27685657 | -0.752154907 | 0.240722595 | -3.124571277 | 0.001780644 | 0.03457107  | nudt3b             | ZDB-GENE-041010-128  | nudt3b            |

|                    |             |              |             |              |             |             |                   |                      |                   |
|--------------------|-------------|--------------|-------------|--------------|-------------|-------------|-------------------|----------------------|-------------------|
| ENSDARG00000104372 | 433.4671264 | 0.221343814  | 0.070842117 | 3.124466411  | 0.001781279 | 0.03457107  | gnb1b             | ZDB-GENE-040426-2855 | gnb1b             |
| ENSDARG00000088524 | 4.051002146 | -2.631024905 | 0.842427569 | -3.123146729 | 0.001789285 | 0.034688921 | acot17            | ZDB-GENE-040426-2381 | acot17            |
| ENSDARG00000045708 | 39.20718367 | 1.190317453  | 0.38124983  | 3.122145529  | 0.001795382 | 0.034769524 | adm2a             | ZDB-GENE-041210-100  | adm2a             |
| ENSDARG00000036864 | 104.8994154 | 0.811442149  | 0.259959091 | 3.121422469  | 0.001799796 | 0.034800336 | slc34a2b          | ZDB-GENE-030709-1    | slc34a2b          |
| ENSDARG00000020326 | 125.1026435 | 0.375255087  | 0.120230144 | 3.121139781  | 0.001801525 | 0.034800336 | tyk2              | ZDB-GENE-071116-4    | tyk2              |
| ENSDARG00000055635 | 263.4280893 | 0.282798502  | 0.090613467 | 3.120932353  | 0.001802794 | 0.034800336 | crk               | ZDB-GENE-040801-148  | crk               |
| ENSDARG0000007081  | 87.88581912 | 0.347832489  | 0.111490084 | 3.119851338  | 0.001809423 | 0.034890741 | pias4a            | ZDB-GENE-040426-2734 | pias4a            |
| ENSDARG00000058679 | 32.46312194 | 0.560380513  | 0.179695802 | 3.118495287  | 0.00181777  | 0.035014048 | zgc:114104        | ZDB-GENE-050913-63   | zgc:114104        |
| ENSDARG00000093186 | 65.10273779 | 1.099032498  | 0.352542738 | 3.117444718  | 0.001824262 | 0.035101376 | si:dkey-30j10.5   | ZDB-GENE-091118-81   | si:dkey-30j10.5   |
| ENSDARG00000104869 | 8.114388529 | -0.934800129 | 0.300201832 | -3.113905477 | 0.001846286 | 0.035470909 | CABZ01085878.1    |                      |                   |
| ENSDARG00000070428 | 14.63317285 | -0.850622388 | 0.273184908 | -3.113723936 | 0.001847423 | 0.035470909 | si:dkey-222b8.1   | ZDB-GENE-060503-248  | si:dkey-222b8.1   |
| ENSDARG00000073688 | 193.0062561 | 0.334452341  | 0.107442648 | 3.112845303  | 0.001852931 | 0.035520709 | nav2a             | ZDB-GENE-120502-3    | nav2a             |
| ENSDARG00000090851 | 18.44130604 | 0.854538249  | 0.274534685 | 3.112678635  | 0.001853978 | 0.035520709 | ciita             | ZDB-GENE-071116-6    | ciita             |
| ENSDARG00000059805 | 23.99176006 | -1.044642512 | 0.335675881 | -3.112057107 | 0.001857886 | 0.03555759  | slc25a38a         | ZDB-GENE-060929-320  | slc25a38a         |
| ENSDARG00000043587 | 150.590179  | -0.396249435 | 0.127350087 | -3.111497176 | 0.001861413 | 0.035587112 | srd5a2a           | ZDB-GENE-050417-199  | srd5a2a           |
| ENSDARG00000055093 | 26.53489775 | -0.733093379 | 0.235688691 | -3.110430869 | 0.001868146 | 0.035654342 | cdh27             | ZDB-GENE-141215-13   | cdh27             |
| ENSDARG00000074635 | 514.4011324 | -0.58897068  | 0.189360712 | -3.110310859 | 0.001868905 | 0.035654342 | abca1a            | ZDB-GENE-031006-12   | abca1a            |
| ENSDARG00000104094 | 71.37799512 | 0.373359349  | 0.120095496 | 3.108853895  | 0.001878146 | 0.035781352 | grk3              | ZDB-GENE-030616-382  | grk3              |
| ENSDARG00000090903 | 94.82860882 | -0.679431531 | 0.218562836 | -3.108632486 | 0.001879554 | 0.035781352 | creb3l3b          | ZDB-GENE-131023-1    | creb3l3b          |
| ENSDARG00000067848 | 533.7652226 | -0.411420277 | 0.132383558 | -3.107789848 | 0.00188492  | 0.035845471 | nmrk2             | ZDB-GENE-040912-44   | nmrk2             |
| ENSDARG00000089903 | 4.798437223 | -1.823228799 | 0.58674337  | -3.10737009  | 0.001887599 | 0.035858388 | CABZ01039863.1    |                      |                   |
| ENSDARG00000039677 | 365.3452885 | -0.441046197 | 0.141959894 | -3.106836616 | 0.001891009 | 0.035885144 | dsc2l             | ZDB-GENE-031116-55   | dsc2l             |
| ENSDARG00000073704 | 44.01292965 | -0.803863623 | 0.258777824 | -3.106385279 | 0.001893898 | 0.035901976 | si:dkeyp-72g9.4   | ZDB-GENE-031204-23   | si:dkeyp-72g9.4   |
| ENSDARG00000076128 | 281.105146  | 0.209954631  | 0.067709311 | 3.100823626  | 0.001929832 | 0.036517111 | prkar1aa          | ZDB-GENE-050116-2    | prkar1aa          |
| ENSDARG00000038643 | 450.1649694 | -0.68319757  | 0.220350157 | -3.100508661 | 0.001931886 | 0.036517111 | alas2             | ZDB-GENE-001229-1    | alas2             |
| ENSDARG00000015653 | 405.6415768 | 0.387513808  | 0.124992045 | 3.100307756  | 0.001933197 | 0.036517111 | tnip1             | ZDB-GENE-070112-1502 | tnip1             |
| ENSDARG00000055592 | 156.1082086 | -0.441882747 | 0.142537797 | -3.100109278 | 0.001934493 | 0.036517111 | capn2b            | ZDB-GENE-050522-84   | capn2b            |
| ENSDARG00000099776 | 551.4279428 | -0.662601806 | 0.213851833 | -3.098415374 | 0.001945585 | 0.036687887 | glula             | ZDB-GENE-030131-688  | glula             |
| ENSDARG00000091061 | 387.079194  | -0.46686397  | 0.150806571 | -3.095780018 | 0.001962959 | 0.036976628 | slc38a3b          | ZDB-GENE-121120-3    | slc38a3b          |
| ENSDARG00000030237 | 272.7232377 | 0.29182036   | 0.094282104 | 3.09518295   | 0.001966915 | 0.037002602 | pgrrmc2           | ZDB-GENE-040426-2102 | pgrrmc2           |
| ENSDARG00000095640 | 4.504977091 | 1.900460419  | 0.614052184 | 3.094949366  | 0.001968465 | 0.037002602 | si:ch1073-15f19.2 | ZDB-GENE-091204-84   | si:ch1073-15f19.2 |
| ENSDARG00000101251 | 1274.265908 | -0.409010913 | 0.132169218 | -3.094600384 | 0.001970782 | 0.037007371 | ldha              | ZDB-GENE-991026-5    | ldha              |
| ENSDARG00000058964 | 7.979648825 | 1.023517088  | 0.330777507 | 3.094276561  | 0.001972935 | 0.037009038 | themis2           | ZDB-GENE-110411-89   | themis2           |
| ENSDARG00000115610 | 369.8647104 | 0.608096892  | 0.196550307 | 3.093848605  | 0.001975783 | 0.037023734 | ccl25a            | ZDB-GENE-110222-1    | ccl25a            |
| ENSDARG00000042557 | 18.92241915 | -0.738619118 | 0.23887005  | -3.092137835 | 0.001987206 | 0.037198911 | rnf144ab          | ZDB-GENE-040718-486  | rnf144ab          |
| ENSDARG00000075517 | 16.24103125 | -0.988397698 | 0.319862982 | -3.090065918 | 0.002001121 | 0.037390709 | si:ch211-120k19.1 | ZDB-GENE-100922-282  | si:ch211-120k19.1 |
| ENSDARG00000056559 | 158.2622662 | 0.546872031  | 0.176981722 | 3.089991587  | 0.002001622 | 0.037390709 | ccz1              | ZDB-GENE-040426-698  | ccz1              |
| ENSDARG00000038703 | 238.1355849 | 0.583497586  | 0.188904592 | 3.088848076  | 0.002009342 | 0.037495862 | hkdc1             | ZDB-GENE-030131-9801 | hkdc1             |
| ENSDARG00000023532 | 174.5872744 | -0.457858324 | 0.148385715 | -3.085595705 | 0.002031448 | 0.037868985 | pinx1             | ZDB-GENE-030515-2    | pinx1             |
| ENSDARG00000041078 | 286.4876912 | 0.416351326  | 0.134953721 | 3.085141514  | 0.002034553 | 0.03788748  | chka              | ZDB-GENE-050208-149  | chka              |
| ENSDARG00000101055 | 10.18017549 | 1.228388652  | 0.398283505 | 3.084206697  | 0.002040957 | 0.037967313 | trim35-25         | ZDB-GENE-060503-484  | trim35-25         |
| ENSDARG00000078473 | 226.5966663 | 0.436970637  | 0.141705822 | 3.083646336  | 0.002044805 | 0.037999473 | nucks1a           | ZDB-GENE-040912-175  | nucks1a           |
| ENSDARG00000016886 | 37.44984953 | 0.963277388  | 0.312505001 | 3.082438314  | 0.002053123 | 0.038114545 | dnajb9b           | ZDB-GENE-050522-76   | dnajb9b           |
| ENSDARG00000078419 | 74.29537924 | 0.569167875  | 0.184685202 | 3.081827171  | 0.002057343 | 0.038153385 | filip1a           | ZDB-GENE-030131-4110 | filip1a           |
| ENSDARG00000052072 | 9.509880218 | 0.942713133  | 0.305948023 | 3.081285257  | 0.002061091 | 0.038183412 | dnajb9a           | ZDB-GENE-050626-115  | dnajb9a           |
| ENSDARG00000096533 | 580.6609941 | 0.436751974  | 0.141766236 | 3.080789792  | 0.002064523 | 0.038207532 | rltgr             | ZDB-GENE-100727-4    | rltgr             |
| ENSDARG00000059391 | 233.7916108 | -0.43850806  | 0.142421171 | -3.07895277  | 0.002077296 | 0.03840428  | gyg1b             | ZDB-GENE-040625-30   | gyg1b             |
| ENSDARG00000079308 | 67.30386855 | -0.812247128 | 0.263881695 | -3.078073031 | 0.002083438 | 0.038478169 | tor3a             | ZDB-GENE-081104-165  | tor3a             |
| ENSDARG00000055647 | 203.4677466 | 0.391256114  | 0.127130387 | 3.077597127  | 0.002086768 | 0.038500015 | ftr82             | ZDB-GENE-030219-207  | ftr82             |

|                    |             |              |             |              |             |             |                   |                      |                   |
|--------------------|-------------|--------------|-------------|--------------|-------------|-------------|-------------------|----------------------|-------------------|
| ENSDARG00000040705 | 133.8690063 | -0.376109863 | 0.122223374 | -3.077233519 | 0.002089316 | 0.038507395 | glsb              | ZDB-GENE-030616-550  | glsb              |
| ENSDARG00000102610 | 14.59484462 | -0.751229453 | 0.244265048 | -3.075468471 | 0.002101721 | 0.038694553 | r3hdm2            | ZDB-GENE-180313-1    | r3hdm2            |
| ENSDARG00000019856 | 96.94432634 | -0.616525589 | 0.200503765 | -3.074882852 | 0.002105853 | 0.038694553 | atp1a1b           | ZDB-GENE-001212-5    | atp1a1b           |
| ENSDARG00000078725 | 53.61139383 | 0.495665808  | 0.161198949 | 3.074869974  | 0.002105943 | 0.038694553 | nos1apa           | ZDB-GENE-081024-1    | nos1apa           |
| ENSDARG00000098312 | 494.8305341 | 0.421788269  | 0.137242524 | 3.073305967  | 0.002117013 | 0.038858133 | scarb2a           | ZDB-GENE-020419-29   | scarb2a           |
| ENSDARG00000067593 | 37.4631197  | -0.443757896 | 0.144427068 | -3.072539669 | 0.002122456 | 0.038900939 | sco1              | ZDB-GENE-140909-1    | sco1              |
| ENSDARG00000100504 | 113.1515944 | 0.819450971  | 0.266716489 | 3.072367115  | 0.002123684 | 0.038900939 | ppp1r27b          | ZDB-GENE-051023-5    | ppp1r27b          |
| ENSDARG00000095410 | 26.57832988 | 0.925685775  | 0.301369367 | 3.071598759  | 0.002129157 | 0.038961404 | si:ch211-285c6.4  | ZDB-GENE-041001-97   | si:ch211-285c6.4  |
| ENSDARG00000079575 | 23.02625265 | -0.652859645 | 0.21261534  | -3.070614028 | 0.002136191 | 0.039050268 | aff3              | ZDB-GENE-030219-193  | aff3              |
| ENSDARG00000042825 | 67.22816531 | -0.414715263 | 0.135104726 | -3.069583686 | 0.002143573 | 0.039145318 | rnf169            | ZDB-GENE-030131-4336 | rnf169            |
| ENSDARG00000031588 | 291.2902907 | -1.037663304 | 0.338145474 | -3.068689022 | 0.002150003 | 0.039222785 | si:dkey-239b22.1  | ZDB-GENE-131119-12   | si:dkey-239b22.1  |
| ENSDARG00000077874 | 16.39344225 | 0.943850861  | 0.307609855 | 3.068337527  | 0.002152533 | 0.039229047 | vwa10.1           | ZDB-GENE-090313-291  | vwa10.1           |
| ENSDARG00000088560 | 83.49168738 | 0.41424678   | 0.13505535  | 3.067237097  | 0.002160474 | 0.039312585 | tmem104           | ZDB-GENE-070822-4    | tmem104           |
| ENSDARG00000027316 | 209.7116264 | -0.445731139 | 0.145326813 | -3.067094977 | 0.002161502 | 0.039312585 | tcp11i2           | ZDB-GENE-040426-1956 | tcp11i2           |
| ENSDARG00000029018 | 224.3746486 | 0.379348271  | 0.123695612 | 3.066788418  | 0.00216372  | 0.039313052 | cdkn1ba           | ZDB-GENE-040812-3    | cdkn1ba           |
| ENSDARG00000073732 | 101.5255356 | -0.481394719 | 0.157032817 | -3.065567626 | 0.002172572 | 0.039433948 | myh14             | ZDB-GENE-100921-1    | myh14             |
| ENSDARG00000079525 | 66.89082797 | 0.626579455  | 0.204418575 | 3.06517867   | 0.0021754   | 0.039445347 | slc39a5           | ZDB-GENE-060608-1    | slc39a5           |
| ENSDARG00000019208 | 9.701048629 | -1.196066741 | 0.390571921 | -3.062346972 | 0.002196087 | 0.039754373 | camsap1a          | ZDB-GENE-060518-4    | camsap1a          |
| ENSDARG00000039899 | 60.89426513 | 0.478283533  | 0.156187503 | 3.062239451  | 0.002196876 | 0.039754373 | zbtb7a            | ZDB-GENE-050208-583  | zbtb7a            |
| ENSDARG00000101322 | 216.8546425 | -0.624219591 | 0.204011599 | -3.059725981 | 0.002215396 | 0.04000783  | tfr1a             | ZDB-GENE-041220-1    | tfr1a             |
| ENSDARG00000037962 | 160.9570158 | -0.451865459 | 0.147691319 | -3.059526184 | 0.002216874 | 0.04000783  | psmb7             | ZDB-GENE-001208-4    | psmb7             |
| ENSDARG00000056541 | 58.44362496 | -1.061058567 | 0.34682908  | -3.059312576 | 0.002218456 | 0.04000783  | nr0b1             | ZDB-GENE-070130-1    | nr0b1             |
| ENSDARG00000079133 | 14.73355388 | 0.683106569  | 0.223300914 | 3.059130201  | 0.002219807 | 0.04000783  | si:dkey-10c21.1   | ZDB-GENE-081104-302  | si:dkey-10c21.1   |
| ENSDARG00000076547 | 95.90303187 | -0.427737989 | 0.139839797 | -3.058771518 | 0.002222466 | 0.040015541 | si:ch211-221f10.2 | ZDB-GENE-140106-124  | si:ch211-221f10.2 |
| ENSDARG00000078285 | 20.99175063 | 0.701882245  | 0.22952065  | 3.058035283  | 0.002227933 | 0.04004997  | pik3ap1           | ZDB-GENE-090313-250  | pik3ap1           |
| ENSDARG00000018425 | 351.9623067 | 0.285541504  | 0.093378675 | 3.057887715  | 0.002229031 | 0.04004997  | ddx61             | ZDB-GENE-030131-6611 | ddx61             |
| ENSDARG00000042826 | 19.59027272 | -0.789321665 | 0.25816058  | -3.057483311 | 0.002232041 | 0.04004997  | egr2b             | ZDB-GENE-980526-283  | egr2b             |
| ENSDARG00000045561 | 26.41922944 | 0.970408886  | 0.317412608 | 3.057247451  | 0.002233798 | 0.04004997  | dram1             | ZDB-GENE-041010-147  | dram1             |
| ENSDARG00000093931 | 30.02150898 | 0.511087721  | 0.167192922 | 3.056874146  | 0.002236582 | 0.04004997  | rflnb             | ZDB-GENE-090409-1    | rflnb             |
| ENSDARG00000055969 | 33.12473638 | -0.571465399 | 0.186964687 | -3.056541893 | 0.002239062 | 0.04004997  | rfc3              | ZDB-GENE-020809-3    | rfc3              |
| ENSDARG00000075812 | 3.982193832 | -1.28383206  | 0.420045097 | -3.05641482  | 0.002240011 | 0.04004997  | kcnt2             | ZDB-GENE-130530-783  | kcnt2             |
| ENSDARG00000102138 | 33.86003672 | 0.625428429  | 0.204681113 | 3.055623553  | 0.00224593  | 0.04007681  | foxa1             | ZDB-GENE-990415-78   | foxa1             |
| ENSDARG00000014230 | 852.7248778 | -0.267710553 | 0.08761261  | -3.055616684 | 0.002245982 | 0.04007681  | dlst              | ZDB-GENE-030326-1    | dlst              |
| ENSDARG00000114661 | 14.61351339 | 1.024117917  | 0.335198305 | 3.055259829  | 0.002248656 | 0.040084644 | BX321875.4        |                      |                   |
| ENSDARG00000061994 | 748.3631622 | -0.422102785 | 0.138306884 | -3.051928965 | 0.002273759 | 0.040464866 | acacb             | ZDB-GENE-060526-132  | acacb             |
| ENSDARG00000074201 | 1326.994354 | -0.30439973  | 0.099743301 | -3.051831329 | 0.002274499 | 0.040464866 | flna              | ZDB-GENE-030131-2145 | flna              |
| ENSDARG00000055080 | 93.28804481 | 0.405167873  | 0.132803268 | 3.050887826  | 0.002281658 | 0.040496887 | rhm4.2            | ZDB-GENE-030131-3019 | rhm4.2            |
| ENSDARG00000035398 | 126.46846   | -0.385779788 | 0.126452542 | -3.050787132 | 0.002282423 | 0.040496887 | enc1              | ZDB-GENE-060531-140  | enc1              |
| ENSDARG00000076484 | 199.8528291 | -0.34046419  | 0.11160193  | -3.050701632 | 0.002283073 | 0.040496887 | stab1             |                      |                   |
| ENSDARG00000039436 | 32.94552218 | -0.540988023 | 0.17744165  | -3.048822091 | 0.002297405 | 0.040707892 | il13ra2           | ZDB-GENE-030521-10   | il13ra2           |
| ENSDARG00000009214 | 135.6056974 | 0.301389683  | 0.098863386 | 3.048547051  | 0.002299509 | 0.040707892 | mfsd13a           | ZDB-GENE-041212-83   | mfsd13a           |
| ENSDARG00000029766 | 62.52694677 | -0.474250754 | 0.155641435 | -3.047072601 | 0.002310819 | 0.040867766 | nr1i2             | ZDB-GENE-030903-3    | nr1i2             |
| ENSDARG00000012553 | 112.5637559 | 0.313360126  | 0.102862424 | 3.046400354  | 0.002315992 | 0.040918906 | rap1aa            | ZDB-GENE-040625-167  | rap1aa            |
| ENSDARG00000089477 | 101.6540058 | 0.348347735  | 0.114375815 | 3.045641568  | 0.002321844 | 0.040981926 | si:ch211-132g1.3  | ZDB-GENE-090312-148  | si:ch211-132g1.3  |
| ENSDARG00000032263 | 6.01562213  | -1.082038683 | 0.355556523 | -3.043225517 | 0.002340569 | 0.041255142 | zgc:110224        | ZDB-GENE-050417-120  | zgc:110224        |
| ENSDARG00000058647 | 124.0265445 | 0.575933844  | 0.189261962 | 3.043051222  | 0.002341925 | 0.041255142 | hck               | ZDB-GENE-090313-72   | hck               |
| ENSDARG00000023053 | 48.14774702 | 0.464791015  | 0.152831337 | 3.041202315  | 0.002356354 | 0.0414686   | fam129ab          | ZDB-GENE-070912-688  | fam129ab          |
| ENSDARG00000042853 | 277.2539112 | -0.277835013 | 0.09138513  | -3.040264997 | 0.002363701 | 0.041557103 | ivd               | ZDB-GENE-030616-262  | ivd               |
| ENSDARG00000037266 | 60.49443615 | -0.449212894 | 0.147992671 | -3.035372571 | 0.002402387 | 0.042195895 | myoz2b            | ZDB-GENE-040426-1853 | myoz2b            |

|                    |             |              |             |              |             |             |                  |                      |                  |
|--------------------|-------------|--------------|-------------|--------------|-------------|-------------|------------------|----------------------|------------------|
| ENSDARG0000087099  | 13.23478689 | 1.375726692  | 0.453313586 | 3.034823426  | 0.002406765 | 0.042231434 | si:ch73-106k19.5 | ZDB-GENE-030131-1230 | si:ch73-106k19.5 |
| ENSDARG0000098746  | 132.7075347 | 0.706281353  | 0.232881546 | 3.032792271  | 0.002423023 | 0.042475149 | dhrs131l         | ZDB-GENE-040426-1907 | dhrs131l         |
| ENSDARG0000088630  | 30.94153485 | -0.548352354 | 0.180838548 | -3.032275811 | 0.002427173 | 0.042506344 | arhgef10la       | ZDB-GENE-120814-1    | arhgef10la       |
| ENSDARG0000057334  | 117.1661819 | 0.33998192   | 0.112185208 | 3.03054143   | 0.002441157 | 0.042631425 | cmasa            | ZDB-GENE-050420-277  | cmasa            |
| ENSDARG0000097795  | 23.84120328 | 0.553849458  | 0.182757061 | 3.030522892  | 0.002441307 | 0.042631425 | zgc:162952       | ZDB-GENE-070424-98   | zgc:162952       |
| ENSDARG0000056515  | 39.80929773 | -0.798921316 | 0.263626418 | -3.030505519 | 0.002441447 | 0.042631425 | spsb1            | ZDB-GENE-030131-6122 | spsb1            |
| ENSDARG0000070339  | 62.98712756 | 0.422702124  | 0.139529143 | 3.029489869  | 0.002449671 | 0.042733418 | hoxc3a           | ZDB-GENE-980526-532  | hoxc3a           |
| ENSDARG0000037281  | 2314.720267 | -0.414265512 | 0.136916794 | -3.025673466 | 0.002480801 | 0.043234399 | fgg              | ZDB-GENE-040426-1998 | fgg              |
| ENSDARG0000075504  | 79.23456364 | 0.631641593  | 0.208818628 | 3.024833551  | 0.0024877   | 0.043312547 | si:dkey-40c23.2  | ZDB-GENE-030131-5958 | si:dkey-40c23.2  |
| ENSDARG0000029688  | 4.420534574 | 1.733637216  | 0.573585924 | 3.022454252  | 0.00250734  | 0.043612148 | hsp70.1          | ZDB-GENE-990415-91   | hsp70.1          |
| ENSDARG0000028583  | 9.752758664 | 1.214858981  | 0.40204559  | 3.021694582  | 0.00251364  | 0.04364541  | si:ch211-234h8.7 | ZDB-GENE-061009-16   | si:ch211-234h8.7 |
| ENSDARG0000035519  | 319.6866238 | 0.764164253  | 0.25289745  | 3.021636846  | 0.00251412  | 0.04364541  | hsth1l           | ZDB-GENE-050417-145  | hsth1l           |
| ENSDARG0000003046  | 23.42039736 | -0.674849642 | 0.22340714  | -3.020716537 | 0.002521773 | 0.043735937 | sorbs2a          | ZDB-GENE-070308-2    | sorbs2a          |
| ENSDARG0000010364  | 1085.705287 | -0.232186436 | 0.076881628 | -3.020050972 | 0.002527321 | 0.043766207 | cs               | ZDB-GENE-030131-1058 | cs               |
| ENSDARG0000035809  | 28088.42967 | -0.438454346 | 0.145187318 | -3.019921796 | 0.0025284   | 0.043766207 | col1a1b          | ZDB-GENE-030131-4400 | col1a1b          |
| ENSDARG0000015887  | 2870.092485 | 0.356682992  | 0.118145993 | 3.019002026  | 0.002536088 | 0.043856965 | b2ml             | ZDB-GENE-040426-2136 | b2ml             |
| ENSDARG0000094557  | 276.0557852 | -0.934440546 | 0.309558277 | -3.018625624 | 0.002539241 | 0.04386918  | nupr1b           | ZDB-GENE-030131-4653 | nupr1b           |
| ENSDARG0000021346  | 390.9313259 | -0.334382772 | 0.110802027 | -3.017839845 | 0.002545834 | 0.043940753 | pdhb             | ZDB-GENE-040426-2173 | pdhb             |
| ENSDARG00000101170 | 9.604498278 | -0.907565422 | 0.300888805 | -3.016281785 | 0.002558953 | 0.044124721 | rab42b           | ZDB-GENE-050417-172  | rab42b           |
| ENSDARG0000035565  | 80.03393926 | 0.483592277  | 0.160367562 | 3.015524271  | 0.002565354 | 0.044192598 | atp6v0a2b        | ZDB-GENE-060526-4    | atp6v0a2b        |
| ENSDARG0000012593  | 4261.033806 | -0.410845326 | 0.13629571  | -3.014367256 | 0.002575159 | 0.044318927 | col5a1           | ZDB-GENE-041105-6    | col5a1           |
| ENSDARG0000069339  | 95.97808603 | 0.399527698  | 0.132596022 | 3.013119787  | 0.002585768 | 0.044458852 | tbcd24           | ZDB-GENE-050809-65   | tbcd24           |
| ENSDARG0000042623  | 99.2608613  | 0.350998908  | 0.11652497  | 3.012220544  | 0.002593441 | 0.044548063 | acbd3            | ZDB-GENE-040426-1930 | acbd3            |
| ENSDARG0000001656  | 66.7193798  | 0.762546989  | 0.253213575 | 3.011477525  | 0.002599796 | 0.044614498 | psmb13a          | ZDB-GENE-001208-2    | psmb13a          |
| ENSDARG0000019897  | 30.76407585 | -0.459261767 | 0.152534055 | -3.010880211 | 0.002604916 | 0.044659615 | gpat4            | ZDB-GENE-060421-5102 | gpat4            |
| ENSDARG0000078500  | 76.050825   | -0.37738457  | 0.125367633 | -3.010223288 | 0.002610557 | 0.044677431 | dap3             | ZDB-GENE-051129-2    | dap3             |
| ENSDARG0000078186  | 364.1786087 | 0.393867686  | 0.130854492 | 3.009966872  | 0.002612762 | 0.044677431 | tex2             | ZDB-GENE-070615-7    | tex2             |
| ENSDARG0000045842  | 56.36229702 | 0.62950883   | 0.20918523  | 3.009336901  | 0.002618186 | 0.044677431 | zgc:113263       | ZDB-GENE-050306-34   | zgc:113263       |
| ENSDARG0000074322  | 82.84246512 | 1.259953634  | 0.418690076 | 3.009275128  | 0.002618719 | 0.044677431 | si:ch211-194m7.3 | ZDB-GENE-131121-19   | si:ch211-194m7.3 |
| ENSDARG0000055548  | 58.76550644 | -0.461988975 | 0.153522636 | -3.009256405 | 0.00261888  | 0.044677431 | npat             | ZDB-GENE-050506-54   | npat             |
| ENSDARG0000006125  | 342.4903822 | -0.228050139 | 0.075788796 | -3.009021786 | 0.002620903 | 0.044677431 | csnk1db          | ZDB-GENE-040426-2385 | csnk1db          |
| ENSDARG0000005154  | 49.62788865 | 0.527307731  | 0.175271673 | 3.00851656   | 0.002625265 | 0.044677786 | aspa             | ZDB-GENE-080204-11   | aspa             |
| ENSDARG00000104256 | 596.5516143 | 0.689296192  | 0.229136964 | 3.008227833  | 0.002627761 | 0.044677786 | bco1             | ZDB-GENE-010508-1    | bco1             |
| ENSDARG0000042533  | 218.9296238 | 0.390552305  | 0.129834579 | 3.008076188  | 0.002629072 | 0.044677786 | gstm.1           | ZDB-GENE-030911-2    | gstm.1           |
| ENSDARG0000039900  | 32.29668449 | 0.604445052  | 0.200954768 | 3.007866186  | 0.00263089  | 0.044677786 | si:ch73-168d20.1 | ZDB-GENE-121214-44   | si:ch73-168d20.1 |
| ENSDARG0000056268  | 19.25780201 | -0.686828212 | 0.228412385 | -3.006965718 | 0.002638695 | 0.044767948 | atxn7l2b         | ZDB-GENE-040718-403  | atxn7l2b         |
| ENSDARG0000037917  | 88.20557773 | 0.44856875   | 0.14919869  | 3.006519355  | 0.002642572 | 0.044791351 | itga3a           | ZDB-GENE-090805-3    | itga3a           |
| ENSDARG0000037708  | 108.4446172 | -0.335012206 | 0.111447126 | -3.006019246 | 0.002646922 | 0.044801977 | exosc10          | ZDB-GENE-040426-781  | exosc10          |
| ENSDARG0000058219  | 12.47693439 | -1.016420598 | 0.338144892 | -3.005872993 | 0.002648196 | 0.044801977 | tubd1            | ZDB-GENE-040625-73   | tubd1            |
| ENSDARG0000099673  | 15.24107037 | -1.077626184 | 0.358668512 | -3.004518512 | 0.002660016 | 0.04495953  | si:dkey-203a12.5 | ZDB-GENE-141216-151  | si:dkey-203a12.5 |
| ENSDARG0000055344  | 60.02969261 | -0.375190909 | 0.124899466 | -3.003943267 | 0.00266505  | 0.045002208 | mipep            | ZDB-GENE-060503-662  | mipep            |
| ENSDARG0000051711  | 13.36204825 | 0.91442139   | 0.304477777 | 3.003245091  | 0.002671172 | 0.045060152 | CR339041.2       |                      |                  |
| ENSDARG0000016864  | 146.1749741 | -0.305391464 | 0.101705412 | -3.002706126 | 0.002675907 | 0.045060152 | farsb            | ZDB-GENE-021206-2    | farsb            |
| ENSDARG0000012788  | 96.59857394 | 0.442233647  | 0.147278994 | 3.002693292  | 0.00267602  | 0.045060152 | foxa3            | ZDB-GENE-980526-423  | foxa3            |
| ENSDARG0000077559  | 9.626671385 | 1.142121626  | 0.380694774 | 3.00009799   | 0.002698928 | 0.045400916 | LO017815.1       |                      |                  |
| ENSDARG0000011581  | 406.6303085 | 0.682371672  | 0.22747026  | 2.999828076  | 0.00270132  | 0.045400916 | si:dkey-23k10.5  | ZDB-GENE-030131-4787 | si:dkey-23k10.5  |
| ENSDARG00000113547 | 114.9419902 | 0.642741354  | 0.214307937 | 2.999148626  | 0.002707352 | 0.045459685 | LO018202.1       |                      |                  |
| ENSDARG0000031757  | 98.54654422 | 0.485025978  | 0.161970169 | 2.994538933  | 0.0027486   | 0.04610348  | tmc4             | ZDB-GENE-030131-7489 | tmc4             |
| ENSDARG0000053291  | 1170.507551 | 0.301437372  | 0.100670702 | 2.994290939  | 0.002750835 | 0.04610348  | pnrc2            | ZDB-GENE-030131-5475 | pnrc2            |

|                    |             |              |             |              |             |             |                   |                      |                   |
|--------------------|-------------|--------------|-------------|--------------|-------------|-------------|-------------------|----------------------|-------------------|
| ENSDARG0000002487  | 80.22689838 | -0.385695635 | 0.128834539 | -2.993728537 | 0.00275591  | 0.046108966 | noc3l             | ZDB-GENE-030131-9878 | noc3l             |
| ENSDARG00000035257 | 52.13953305 | -0.577519153 | 0.192912473 | -2.993684875 | 0.002756305 | 0.046108966 | akr1a1a           | ZDB-GENE-040808-44   | akr1a1a           |
| ENSDARG00000056615 | 68.87484647 | 0.945297629  | 0.316181929 | 2.989726932  | 0.002792269 | 0.046667072 | cybb              | ZDB-GENE-040426-1380 | cybb              |
| ENSDARG00000070351 | 8.647798854 | 1.033001883  | 0.345567364 | 2.989292369  | 0.002796244 | 0.046689989 | hoxc11a           | ZDB-GENE-990415-111  | hoxc11a           |
| ENSDARG00000010572 | 306.5762937 | -0.890928878 | 0.298204208 | -2.987646901 | 0.002811342 | 0.046889829 | slc25a25a         | ZDB-GENE-040426-2396 | slc25a25a         |
| ENSDARG00000011459 | 272.4225198 | 0.259625178  | 0.086906193 | 2.987418603  | 0.002813442 | 0.046889829 | gsna              | ZDB-GENE-030131-9653 | gsna              |
| ENSDARG00000029995 | 8993.102577 | -0.445332518 | 0.149095821 | -2.986888001 | 0.00281833  | 0.046927672 | tnni2b.2          | ZDB-GENE-040801-9    | tnni2b.2          |
| ENSDARG00000023536 | 1256.899141 | -0.374115901 | 0.125304967 | -2.985643027 | 0.002829828 | 0.047040572 | nnt               | ZDB-GENE-040426-2592 | nnt               |
| ENSDARG00000101799 | 7.780731703 | -1.176249339 | 0.393976048 | -2.985585913 | 0.002830356 | 0.047040572 | si:ch1073-82l19.1 | ZDB-GENE-030131-5941 | si:ch1073-82l19.1 |
| ENSDARG00000074968 | 14.59396341 | 0.676609804  | 0.226888446 | 2.982125435  | 0.002862547 | 0.047531531 | polr2m            | ZDB-GENE-160728-95   | polr2m            |
| ENSDARG00000062096 | 179.9229733 | 0.347529751  | 0.116591574 | 2.980744997  | 0.002875481 | 0.047702133 | pm20d1.2          | ZDB-GENE-061013-637  | pm20d1.2          |
| ENSDARG0000001933  | 27.02515219 | -0.512549655 | 0.172015438 | -2.979672407 | 0.002885568 | 0.047825222 | prkag2b           | ZDB-GENE-070912-442  | prkag2b           |
| ENSDARG00000104412 | 26.10375486 | 0.619756484  | 0.208070614 | 2.978587282  | 0.002895805 | 0.04795058  | si:dkey-72l17.5   | ZDB-GENE-070424-250  | si:dkey-72l17.5   |
| ENSDARG00000042652 | 332.6848555 | 0.323769018  | 0.108715484 | 2.978131594  | 0.002900114 | 0.047977631 | rreb1b            | ZDB-GENE-070912-273  | rreb1b            |
| ENSDARG00000038941 | 12.16606131 | -0.769600963 | 0.258455601 | -2.977691175 | 0.002904285 | 0.048002337 | ppp1r1c           | ZDB-GENE-040718-273  | ppp1r1c           |
| ENSDARG00000070668 | 13.61542058 | 1.03597844   | 0.347989521 | 2.97703919   | 0.002910468 | 0.048060243 | cd4-1             | ZDB-GENE-100922-280  | cd4-1             |
| ENSDARG00000077083 | 6.493376196 | -1.05645595  | 0.354954955 | -2.976309905 | 0.002917399 | 0.048130371 | avpr1aa           | ZDB-GENE-101028-2    | avpr1aa           |
| ENSDARG00000040799 | 28.98407837 | -1.31515166  | 0.442145593 | -2.974476465 | 0.00293489  | 0.048374427 | sst1.1            | ZDB-GENE-030131-4743 | sst1.1            |
| ENSDARG00000043722 | 2499.53724  | 0.708128839  | 0.238129213 | 2.973716798  | 0.002942165 | 0.048449809 | cpa4              | ZDB-GENE-040704-61   | cpa4              |
| ENSDARG00000020007 | 22506.19026 | -0.419506158 | 0.141126005 | -2.972564532 | 0.002953231 | 0.048587427 | col1a2            | ZDB-GENE-030131-8415 | col1a2            |
| ENSDARG00000022698 | 190.8783921 | 0.539173742  | 0.181426244 | 2.971861907  | 0.002959998 | 0.048641522 | lad1              | ZDB-GENE-030616-268  | lad1              |
| ENSDARG00000054903 | 89.91473805 | -0.414589376 | 0.1395144   | -2.971660095 | 0.002961944 | 0.048641522 | mta3              | ZDB-GENE-030131-6485 | mta3              |
| ENSDARG00000114063 | 285.1826125 | 0.608093694  | 0.204686322 | 2.97085651   | 0.002969705 | 0.048724355 | parm1             | ZDB-GENE-140106-262  | parm1             |
| ENSDARG00000003307 | 74.71770941 | 0.316695259  | 0.106614604 | 2.970467903  | 0.002973465 | 0.048741447 | stx16             | ZDB-GENE-060810-113  | stx16             |
| ENSDARG00000100419 | 143.0889689 | -0.511279146 | 0.172204714 | -2.969019462 | 0.002987517 | 0.048927066 | ints1             | ZDB-GENE-030131-6523 | ints1             |
| ENSDARG00000061145 | 25.72799496 | -0.572615636 | 0.192919632 | -2.96815638  | 0.002995919 | 0.049019899 | gfod2             | ZDB-GENE-061103-64   | gfod2             |
| ENSDARG00000006112 | 108.4870623 | -0.389281041 | 0.131193754 | -2.967222372 | 0.003005035 | 0.04907959  | myof              | ZDB-GENE-040426-1138 | myof              |
| ENSDARG00000091119 | 14.81946284 | -0.861461843 | 0.290326065 | -2.967221853 | 0.00300504  | 0.04907959  | fbxo40.2          | ZDB-GENE-120215-105  | fbxo40.2          |
| ENSDARG00000039871 | 75.16729053 | 0.306644195  | 0.103356048 | 2.966872306  | 0.003008459 | 0.049090711 | rpz4              | ZDB-GENE-050417-472  | rpz4              |
| ENSDARG00000089836 | 64.51695224 | -0.428543649 | 0.144491665 | -2.965871073 | 0.00301827  | 0.049206031 | MRPS12            | ZDB-GENE-091204-48   | si:dkey-17e16.10  |
| ENSDARG00000103692 | 16.0970445  | -1.482329001 | 0.499877074 | -2.965387048 | 0.003023023 | 0.049238762 | p4ha3             | ZDB-GENE-041010-4    | p4ha3             |
| ENSDARG00000075718 | 120.5684498 | 0.334005075  | 0.112648036 | 2.965032377  | 0.003026511 | 0.049250833 | rpz5              | ZDB-GENE-030131-4678 | rpz5              |
| ENSDARG00000099973 | 246.9492713 | 0.285797391  | 0.096452744 | 2.963082031  | 0.003045754 | 0.049519043 | mia2              | ZDB-GENE-100618-1    | mia2              |
| ENSDARG00000075337 | 25.20328247 | -0.697576445 | 0.235450463 | -2.962731247 | 0.003049227 | 0.0495306   | lars2             | ZDB-GENE-070928-3    | lars2             |
| ENSDARG00000079900 | 80.62236948 | -0.362229628 | 0.12235906  | -2.960382555 | 0.003072572 | 0.049864653 | shroom4           | ZDB-GENE-041111-246  | shroom4           |
| ENSDARG00000052674 | 537.2608749 | 0.191768427  | 0.064804818 | 2.959169267  | 0.003084696 | 0.049986595 | csnk1a1           | ZDB-GENE-020419-19   | csnk1a1           |
| ENSDARG00000010565 | 8.920302343 | -0.904406146 | 0.305638347 | -2.959072884 | 0.003085661 | 0.049986595 | aqp4              | ZDB-GENE-040724-152  | aqp4              |
| ENSDARG00000022995 | 310.103995  | 0.353599109  | 0.119541266 | 2.957966913  | 0.003096754 | 0.050121013 | clic4             | ZDB-GENE-030326-3    | clic4             |
| ENSDARG00000109769 | 20.16832459 | -0.978088366 | 0.330737634 | -2.957293832 | 0.003103522 | 0.050155257 | LO017835.1        |                      |                   |
| ENSDARG00000056338 | 183.3734815 | 0.268707268  | 0.090876141 | 2.956851658  | 0.003107976 | 0.050155257 | szrd1             | ZDB-GENE-050522-55   | szrd1             |
| ENSDARG00000042293 | 58.11088661 | 0.595354229  | 0.201353874 | 2.956755763  | 0.003108943 | 0.050155257 | ca4b              | ZDB-GENE-080815-5    | ca4b              |
| ENSDARG00000067916 | 101.5989135 | 0.42626804   | 0.144172871 | 2.956645297  | 0.003110057 | 0.050155257 | lyn               | ZDB-GENE-040912-7    | lyn               |
| ENSDARG00000073841 | 437.8010062 | -0.210627715 | 0.071265091 | -2.955552463 | 0.003121096 | 0.050243569 | herc2             | ZDB-GENE-070718-6    | herc2             |
| ENSDARG00000063050 | 71.92464817 | -0.383680626 | 0.129817063 | -2.955548496 | 0.003121136 | 0.050243569 | rc3h2             | ZDB-GENE-060503-694  | rc3h2             |
| ENSDARG00000002994 | 192.4548043 | 0.398949845  | 0.135011817 | 2.95492538   | 0.003127447 | 0.050247683 | itpkca            | ZDB-GENE-030131-6009 | itpkca            |
| ENSDARG00000036305 | 47.23971496 | 0.443439956  | 0.150079347 | 2.954703387  | 0.003129698 | 0.050247683 | phf23b            | ZDB-GENE-030131-5895 | phf23b            |
| ENSDARG00000102835 | 18.29660867 | 0.84524654   | 0.286069105 | 2.954693547  | 0.003129798 | 0.050247683 | CABZ01021435.1    |                      |                   |
| ENSDARG00000015472 | 215.3936684 | 0.233449787  | 0.079018353 | 2.954374227  | 0.003133038 | 0.050254719 | gpc4              | ZDB-GENE-011119-1    | gpc4              |
| ENSDARG00000007671 | 217.6649865 | -0.414069613 | 0.140186904 | -2.953696828 | 0.003139923 | 0.050320143 | ghrb              | ZDB-GENE-071119-4    | ghrb              |

|                    |             |              |             |              |             |             |                    |                      |                    |
|--------------------|-------------|--------------|-------------|--------------|-------------|-------------|--------------------|----------------------|--------------------|
| ENSDARG00000025615 | 132.9662603 | 0.448195141  | 0.151781482 | 2.952897374  | 0.003148066 | 0.050405596 | prr15la            | ZDB-GENE-040801-218  | prr15la            |
| ENSDARG00000032496 | 126.4930216 | 0.523479037  | 0.17729586  | 2.952573384  | 0.003151372 | 0.050413511 | pon1               | ZDB-GENE-040912-6    | pon1               |
| ENSDARG00000068996 | 97.25910722 | 0.590827085  | 0.200324088 | 2.949356162  | 0.003184368 | 0.050895958 | hist2h2l           | ZDB-GENE-031118-36   | hist2h2l           |
| ENSDARG00000052928 | 215.9154805 | 0.337371916  | 0.114491894 | 2.946688236  | 0.003211969 | 0.051291392 | arf6b              | ZDB-GENE-030131-9056 | arf6b              |
| ENSDARG00000071213 | 14.58127186 | -0.738591191 | 0.250694552 | -2.946179662 | 0.003217255 | 0.051320916 | rgl3a              | ZDB-GENE-101130-1    | rgl3a              |
| ENSDARG00000090625 | 13.73455843 | 0.694179157  | 0.235650721 | 2.945796871  | 0.003221239 | 0.051320916 | si:ch73-248e21.1   | ZDB-GENE-120215-198  | si:ch73-248e21.1   |
| ENSDARG00000056467 | 51.68251712 | -0.384810325 | 0.130635256 | -2.945685089 | 0.003222403 | 0.051320916 | tmub2              | ZDB-GENE-030616-254  | tmub2              |
| ENSDARG00000045847 | 312.2081314 | -0.243130823 | 0.08258349  | -2.944060882 | 0.003239363 | 0.051545245 | si:ch211-214j24.10 | ZDB-GENE-030131-6301 | si:ch211-214j24.10 |
| ENSDARG00000057125 | 168.9607557 | 0.456431401  | 0.155083245 | 2.943138063  | 0.003249035 | 0.051653318 | pld1b              | ZDB-GENE-070510-3    | pld1b              |
| ENSDARG00000054723 | 314.5829043 | 0.409795706  | 0.139340624 | 2.940963622  | 0.00327193  | 0.051970137 | si:ch211-242b18.1  | ZDB-GENE-030131-1518 | si:ch211-242b18.1  |
| ENSDARG00000094336 | 43.34144339 | 0.550849957  | 0.187319596 | 2.940695848  | 0.003274759 | 0.051970137 | si:dkeyp-82a1.6    | ZDB-GENE-081105-150  | si:dkeyp-82a1.6    |
| ENSDARG00000094845 | 47.33946248 | -0.92324844  | 0.31400551  | -2.940230066 | 0.003279686 | 0.052002311 | zmp:0000001323     | ZDB-GENE-140106-283  | zmp:0000001323     |
| ENSDARG00000093640 | 90.43082516 | -1.052577511 | 0.358116024 | -2.939208082 | 0.003290521 | 0.052128012 | ugt5a2             | ZDB-GENE-061103-373  | ugt5a2             |
| ENSDARG00000090386 | 30.17608366 | -0.524779865 | 0.17860346  | -2.938240198 | 0.003300812 | 0.052244888 | cd3eap             | ZDB-GENE-101202-2    | cd3eap             |
| ENSDARG00000004539 | 39.82037741 | -0.712150881 | 0.242580097 | -2.935735005 | 0.003327585 | 0.052605639 | ptgs2a             | ZDB-GENE-020530-2    | ptgs2a             |
| ENSDARG00000035563 | 67.97459337 | 0.528376542  | 0.17999614  | 2.935488184  | 0.003330233 | 0.052605639 | znf703             | ZDB-GENE-010717-1    | znf703             |
| ENSDARG00000016200 | 62.77172492 | -0.484124133 | 0.164940728 | -2.935140029 | 0.003333972 | 0.052605639 | trib3              | ZDB-GENE-040426-2609 | trib3              |
| ENSDARG00000087401 | 12.1520907  | -0.759681206 | 0.25885444  | -2.934781434 | 0.003337827 | 0.052605639 | slc25a34           | ZDB-GENE-040426-1442 | slc25a34           |
| ENSDARG00000058212 | 24.83542432 | 0.539073373  | 0.183686918 | 2.934740152  | 0.003338271 | 0.052605639 | ndnl2              | ZDB-GENE-031107-3    | ndnl2              |
| ENSDARG00000058650 | 24.28629937 | 0.633938148  | 0.216079542 | 2.933818452  | 0.00333482  | 0.052715775 | dpm3               | ZDB-GENE-040426-1782 | dpm3               |
| ENSDARG00000012896 | 29.40740168 | -0.539180305 | 0.183822695 | -2.933154169 | 0.003355372 | 0.052782361 | anos1a             | ZDB-GENE-000201-9    | anos1a             |
| ENSDARG00000114141 | 19.20808389 | -1.192801423 | 0.406781679 | -2.932288954 | 0.003364735 | 0.052829592 | CABZ01083546.1     |                      |                    |
| ENSDARG00000022000 | 21.74508125 | 0.678400626  | 0.231358967 | 2.932242625  | 0.003365237 | 0.052829592 | traf3              | ZDB-GENE-040801-257  | traf3              |
| ENSDARG00000042545 | 21.22554523 | -0.694465674 | 0.236852445 | -2.932060392 | 0.003367213 | 0.052829592 | sema3ga            | ZDB-GENE-050513-3    | sema3ga            |
| ENSDARG00000077571 | 53.12818986 | 0.539311438  | 0.183963095 | 2.931628414  | 0.003371899 | 0.05285688  | zgc:174862         | ZDB-GENE-080303-29   | zgc:174862         |
| ENSDARG00000076011 | 217.4575555 | -0.334329137 | 0.114075492 | -2.930770949 | 0.003381122 | 0.052936061 | si:ch211-149b19.3  | ZDB-GENE-110411-37   | si:ch211-149b19.3  |
| ENSDARG00000057610 | 6.098700674 | 1.035677206  | 0.353414993 | 2.930484634  | 0.003384337 | 0.052936061 | cdkn2c             | ZDB-GENE-081104-145  | cdkn2c             |
| ENSDARG00000037965 | 308.6758646 | 0.353761076  | 0.120723156 | 2.93034981   | 0.003385806 | 0.052936061 | srrm2              | ZDB-GENE-050522-399  | srrm2              |
| ENSDARG00000036636 | 27.29801382 | 0.836863677  | 0.285643423 | 2.929749505  | 0.003392353 | 0.052992226 | ebpl               | ZDB-GENE-030616-542  | ebpl               |
| ENSDARG00000016260 | 472.6559653 | -0.534239239 | 0.182440105 | -2.928299338 | 0.003408217 | 0.053193702 | fxr2               | ZDB-GENE-040426-943  | fxr2               |
| ENSDARG00000044254 | 118.5507919 | 0.614439467  | 0.20988897  | 2.927450009  | 0.00341754  | 0.053292821 | anxa3b             | ZDB-GENE-041114-128  | anxa3b             |
| ENSDARG00000074979 | 235.7112937 | 0.328514274  | 0.112250931 | 2.926606221  | 0.003426825 | 0.053391178 | larp4ab            | ZDB-GENE-100729-2    | larp4ab            |
| ENSDARG00000033172 | 45.33629516 | 0.533843803  | 0.182456612 | 2.92586713   | 0.003434976 | 0.053458838 | nr2f5              | ZDB-GENE-990415-253  | nr2f5              |
| ENSDARG00000069295 | 63.05927632 | -0.703196701 | 0.240353895 | -2.925672165 | 0.003437129 | 0.053458838 | bcl6ab             | ZDB-GENE-030131-7523 | bcl6ab             |
| ENSDARG00000070127 | 68.42139854 | -0.428279231 | 0.146423692 | -2.924931247 | 0.003445323 | 0.053539847 | nfxl1              | ZDB-GENE-110411-178  | nfxl1              |
| ENSDARG00000060682 | 37.1764035  | -0.702544661 | 0.240312396 | -2.923464098 | 0.003461601 | 0.053746232 | agr1               | ZDB-GENE-030131-7249 | agr1               |
| ENSDARG00000090340 | 50.52923548 | 0.583120653  | 0.199539041 | 2.922338658  | 0.003474136 | 0.053894182 | si:dkey-27o4.1     | ZDB-GENE-131121-60   | si:dkey-27o4.1     |
| ENSDARG00000040309 | 34.85606374 | 0.506059388  | 0.173252966 | 2.92092771   | 0.003489908 | 0.054092065 | pxdc1b             | ZDB-GENE-091204-294  | pxdc1b             |
| ENSDARG00000062550 | 87.73942076 | -0.371017826 | 0.127068485 | -2.919825677 | 0.003502272 | 0.054236831 | rc3h1a             | ZDB-GENE-050208-702  | rc3h1a             |
| ENSDARG00000014373 | 7.630342945 | -2.65231773  | 0.908746656 | -2.918654734 | 0.003515454 | 0.054379731 | ddx4               | ZDB-GENE-990415-272  | ddx4               |
| ENSDARG00000086261 | 21.21834624 | -0.627988463 | 0.215177469 | -2.91846756  | 0.003517565 | 0.054379731 | fhdc4              | ZDB-GENE-131127-25   | fhdc4              |
| ENSDARG00000079438 | 121.5909868 | 0.338725385  | 0.11610395  | 2.917432046  | 0.003529265 | 0.054513623 | pkp3b              | ZDB-GENE-130530-870  | pkp3b              |
| ENSDARG00000040190 | 399.2388644 | 0.510935846  | 0.175188258 | 2.916495965  | 0.003539873 | 0.054609686 | qdptra             | ZDB-GENE-070705-197  | qdptra             |
| ENSDARG00000077950 | 85.61135654 | 0.423004008  | 0.145047936 | 2.916304901  | 0.003542042 | 0.054609686 | tor1               | ZDB-GENE-080917-50   | tor1               |
| ENSDARG00000095005 | 11.38085897 | 1.225982442  | 0.420421709 | 2.916077869  | 0.00354462  | 0.054609686 | si:dkey-21e2.10    | ZDB-GENE-050208-778  | si:dkey-21e2.10    |
| ENSDARG00000100265 | 3.786231527 | -1.797803535 | 0.61666193  | -2.915359322 | 0.003552792 | 0.054688606 | rhcgbl             | ZDB-GENE-040426-2595 | rhcgbl             |
| ENSDARG00000079107 | 7.769173084 | -0.926822264 | 0.318037821 | -2.914188824 | 0.003566141 | 0.054847009 | clec11a            | ZDB-GENE-130530-861  | clec11a            |
| ENSDARG00000042737 | 68.3116666  | -0.659565181 | 0.226563971 | -2.911165342 | 0.003600834 | 0.055333127 | slc52a3            | ZDB-GENE-060421-4490 | slc52a3            |
| ENSDARG00000040674 | 172.7906148 | -0.231173699 | 0.079496354 | -2.907978615 | 0.003637732 | 0.055852269 | ctdsp1             | ZDB-GENE-050522-523  | ctdsp1             |



|                    |             |              |             |              |             |             |                      |                      |                   |
|--------------------|-------------|--------------|-------------|--------------|-------------|-------------|----------------------|----------------------|-------------------|
| ENSDARG00000089327 | 6.136278944 | 1.263262365  | 0.434500025 | 2.907393078  | 0.003644549 | 0.055909067 | BX120005.1           |                      |                   |
| ENSDARG00000104818 | 121.9428253 | 0.628802007  | 0.216323098 | 2.906772387  | 0.003651788 | 0.055972236 | si:ch211-93f2.1      | ZDB-GENE-041014-96   | si:ch211-93f2.1   |
| ENSDARG00000010717 | 144.0933027 | -0.46640613  | 0.160488917 | -2.906157884 | 0.003658968 | 0.055994258 | chchd10              | ZDB-GENE-040426-1753 | chchd10           |
| ENSDARG00000062864 | 162.1570905 | 0.416827832  | 0.143431295 | 2.90611496   | 0.00365947  | 0.055994258 | gk5                  | ZDB-GENE-061110-49   | gk5               |
| ENSDARG00000005004 | 50.85055663 | -0.638320786 | 0.219691331 | -2.905534702 | 0.003666262 | 0.056050362 | slc5a12              | ZDB-GENE-040426-1343 | slc5a12           |
| ENSDARG00000104139 | 142.4831532 | -0.73522822  | 0.253118861 | -2.904675759 | 0.003676337 | 0.056156522 | atp1a3b              | ZDB-GENE-001212-8    | atp1a3b           |
| ENSDARG00000041140 | 74.10885188 | -0.458326182 | 0.15783569  | -2.903818404 | 0.003686419 | 0.05625718  | ddb2                 | ZDB-GENE-050419-169  | ddb2              |
| ENSDARG00000023724 | 183.7365314 | 0.324664324  | 0.111815182 | 2.903579971  | 0.003689227 | 0.05625718  | cdc42se1             | ZDB-GENE-030131-9260 | cdc42se1          |
| ENSDARG00000027249 | 1532.794341 | -0.519962229 | 0.179106666 | -2.903086981 | 0.00369504  | 0.05625718  | btg1                 | ZDB-GENE-010726-1    | btg1              |
| ENSDARG00000057032 | 32.90305035 | 0.650048198  | 0.223935373 | 2.902838393  | 0.003697974 | 0.05625718  | ppm1nb               | ZDB-GENE-071004-34   | ppm1nb            |
| ENSDARG00000062897 | 118.3785238 | -0.321324921 | 0.110695416 | -2.902784341 | 0.003698612 | 0.05625718  | tnksb                | ZDB-GENE-030131-4865 | tnksb             |
| ENSDARG00000102299 | 26.05768673 | 0.846735062  | 0.292001077 | 2.899766912  | 0.003734402 | 0.056753423 | cxcl8b.1             | ZDB-GENE-101026-3    | cxcl8b.1          |
| ENSDARG00000018600 | 500.2102185 | 0.45418087   | 0.156643358 | 2.899458205  | 0.003738082 | 0.056761237 | retsat               | ZDB-GENE-050320-11   | retsat            |
| ENSDARG00000009480 | 113.3911589 | 0.286591074  | 0.098983206 | 2.895350503  | 0.003787354 | 0.057453081 | pdcl                 | ZDB-GENE-030131-2365 | pdcl              |
| ENSDARG00000110698 | 604.5578561 | -0.65275057  | 0.225483505 | -2.894892782 | 0.003792881 | 0.057453081 | CABZ01061524.1       |                      |                   |
| ENSDARG00000058656 | 954.6253974 | -0.51155328  | 0.17671078  | -2.894861766 | 0.003793255 | 0.057453081 | desma                | ZDB-GENE-980526-221  | desma             |
| ENSDARG00000045979 | 50.24096882 | -0.61878828  | 0.213776838 | -2.894552501 | 0.003796994 | 0.057461177 | zgc:153704           | ZDB-GENE-060929-1114 | zgc:153704        |
| ENSDARG00000056387 | 4.087708094 | -2.606245806 | 0.900763116 | -2.893375362 | 0.003811255 | 0.057628364 | rnf17                | ZDB-GENE-030131-6451 | rnf17             |
| ENSDARG00000099518 | 98.89036975 | 0.66058644   | 0.228408111 | 2.892132144  | 0.00382637  | 0.057808162 | si:ch211-119e14.1    | ZDB-GENE-141216-162  | si:ch211-119e14.1 |
| ENSDARG00000102424 | 3.984259448 | -1.395818978 | 0.48278306  | -2.891192948 | 0.003837824 | 0.057932408 | si:ch211-114m9.1     | ZDB-GENE-120215-49   | si:ch211-114m9.1  |
| ENSDARG00000037551 | 122.8325767 | 0.746754656  | 0.258319433 | 2.890818731  | 0.003842397 | 0.057952651 | pm20d1.1             | ZDB-GENE-051120-102  | pm20d1.1          |
| ENSDARG00000037057 | 320.6871051 | -0.390639914 | 0.135185768 | -2.889652656 | 0.003856677 | 0.05811915  | gcdha                | ZDB-GENE-040426-1855 | gcdha             |
| ENSDARG00000076800 | 5.828663204 | 1.122341541  | 0.388458519 | 2.889218501  | 0.003862006 | 0.058133832 | tnfrsf18             | ZDB-GENE-101104-7    | tnfrsf18          |
| ENSDARG00000024717 | 225.9153539 | 0.304880716  | 0.284080716 | 2.889045244  | 0.003864135 | 0.058133832 | selenbp1             | ZDB-GENE-040426-1436 | selenbp1          |
| ENSDARG00000059369 | 15.02781265 | -1.230007011 | 0.425798699 | -2.888705421 | 0.003868313 | 0.058147906 | si:ch1073-15f12.3    | ZDB-GENE-081104-69   | si:ch1073-15f12.3 |
| ENSDARG00000101726 | 1013.815231 | 0.484920999  | 0.167997497 | 2.886477527  | 0.003895806 | 0.05851213  | si:ch211-93f2.1      | ZDB-GENE-041014-96   | si:ch211-93f2.1   |
| ENSDARG00000092361 | 37.15530139 | 0.581036217  | 0.201347772 | 2.885734528  | 0.003905014 | 0.058601351 | si:dkey-79f11.7      | ZDB-GENE-090313-338  | si:dkey-79f11.7   |
| ENSDARG00000017126 | 261.6661575 | 0.433821398  | 0.150356531 | 2.885284693  | 0.003910598 | 0.058615823 | ilvbl                | ZDB-GENE-040426-1623 | ilvbl             |
| ENSDARG00000095273 | 232.2720518 | -0.462004125 | 0.160144676 | -2.884917161 | 0.003915167 | 0.058615823 | cox8a                | ZDB-GENE-030131-9136 | cox8a             |
| ENSDARG00000023759 | 6.041376347 | 1.028325966  | 0.356455179 | 2.884867515  | 0.003915784 | 0.058615823 | zgc:73226            | ZDB-GENE-050703-8    | zgc:73226         |
| ENSDARG00000008263 | 48.12672328 | -0.665040411 | 0.230562798 | -2.884422016 | 0.003921329 | 0.058649864 | mfsd4ab              | ZDB-GENE-060810-38   | mfsd4ab           |
| ENSDARG00000095184 | 7.159081181 | -0.940991561 | 0.32652811  | -2.881808737 | 0.003953997 | 0.059089185 | si:ch73-52p7.1       | ZDB-GENE-081107-46   | si:ch73-52p7.1    |
| ENSDARG00000062662 | 97.31986595 | -0.468593767 | 0.162648906 | -2.881013959 | 0.003963981 | 0.059140407 | lmod3                | ZDB-GENE-090313-353  | lmod3             |
| ENSDARG00000040553 | 133.5230529 | 0.57936079   | 0.201096358 | 2.881010852  | 0.00396402  | 0.059140407 | tmem97               | ZDB-GENE-110627-1    | tmem97            |
| ENSDARG00000075864 | 185.4109264 | 0.512012802  | 0.177764872 | 2.880281108  | 0.003973207 | 0.059228203 | igsf9a               | ZDB-GENE-060503-288  | igsf9a            |
| ENSDARG00000033144 | 280.9946875 | 0.381370479  | 0.13247053  | 2.878908077  | 0.003990546 | 0.05937922  | psme2                | ZDB-GENE-991110-16   | psme2             |
| ENSDARG00000077726 | 86.0476517  | -0.798464081 | 0.27735644  | -2.878837358 | 0.003991441 | 0.05937922  | nocta                | ZDB-GENE-050208-306  | nocta             |
| ENSDARG00000036846 | 272.5910761 | 0.448101087  | 0.155669185 | 2.878547145  | 0.003995116 | 0.05937922  | anks4b               | ZDB-GENE-040704-29   | anks4b            |
| ENSDARG00000056407 | 26.52474255 | 0.806437208  | 0.280165519 | 2.878431334  | 0.003996583 | 0.05937922  | irf8                 | ZDB-GENE-040718-367  | irf8              |
| ENSDARG0000002968  | 860.8285162 | 0.393168951  | 0.13686736  | 2.872627577  | 0.004070737 | 0.060392459 | a1cf                 | ZDB-GENE-060824-3    | a1cf              |
| ENSDARG00000008414 | 30.30621591 | -0.606504491 | 0.211155703 | -2.872309309 | 0.004074839 | 0.060392459 | exoc3l2a             | ZDB-GENE-060526-343  | exoc3l2a          |
| ENSDARG00000078751 | 132.3336435 | -0.288809772 | 0.100549795 | -2.872305915 | 0.004074883 | 0.060392459 | tpp2                 | ZDB-GENE-121214-290  | tpp2              |
| ENSDARG00000037967 | 70.99309839 | 0.466081182  | 0.162283785 | 2.872013259  | 0.004078659 | 0.0603985   | si:dkey-16l2.16      | ZDB-GENE-141219-36   | si:dkey-16l2.16   |
| ENSDARG00000076807 | 8.84688293  | 0.852038063  | 0.297160843 | 2.867262235  | 0.004140398 | 0.061262173 | zgc:174268           | ZDB-GENE-080219-18   | zgc:174268        |
| ENSDARG00000078362 | 86.77950932 | -0.54475249  | 0.190065827 | -2.866125375 | 0.004155296 | 0.06143193  | zmp:0000000846       | ZDB-GENE-130530-849  | zmp:0000000846    |
| ENSDARG00000095400 | 18.25202848 | -0.703309594 | 0.245507457 | -2.864717841 | 0.00417381  | 0.061654801 | si:ch73-52f15.5      | ZDB-GENE-091204-341  | si:ch73-52f15.5   |
| ENSDARG00000105241 | 11.29042039 | 1.151776567  | 0.402156195 | 2.864003044  | 0.00418324  | 0.061743244 | btr26                | ZDB-GENE-070705-378  | btr26             |
| ENSDARG00000021899 | 24.32571391 | 0.567826199  | 0.198297555 | 2.863505809  | 0.004189811 | 0.06178938  | b4galt7              | ZDB-GENE-040727-3    | b4galt7           |
| ENSDARG00000058270 | 78.46068305 | 0.553751579  | 0.193458707 | 2.862376096  | 0.004204776 | 0.061943734 | COLGALT1 {1 of many} | ZDB-GENE-070424-114  | si:ch211-114l13.7 |

|                    |             |              |             |              |             |             |                  |                      |                  |
|--------------------|-------------|--------------|-------------|--------------|-------------|-------------|------------------|----------------------|------------------|
| ENSDARG0000002682  | 121.6674631 | 0.458369218  | 0.160146075 | 2.862194521  | 0.004207186 | 0.061943734 | tbcela           | ZDB-GENE-040426-1719 | tbcela           |
| ENSDARG00000077955 | 65.1660941  | 0.354416228  | 0.1238629   | 2.86135903   | 0.004218291 | 0.062031066 | rnf6             | ZDB-GENE-100209-1    | rnf6             |
| ENSDARG00000016687 | 546.0483033 | -0.311651244 | 0.108922202 | -2.861227906 | 0.004220036 | 0.062031066 | acadvl           | ZDB-GENE-030131-899  | acadvl           |
| ENSDARG00000078770 | 70.89850562 | 0.562859262  | 0.196790526 | 2.860194917  | 0.004233807 | 0.062138551 | si:ch73-21k16.5  | ZDB-GENE-030131-8374 | si:ch73-21k16.5  |
| ENSDARG00000052818 | 23.01806741 | 0.603105226  | 0.210864184 | 2.860159633  | 0.004234278 | 0.062138551 | smcr8a           | ZDB-GENE-071212-4    | smcr8a           |
| ENSDARG00000021948 | 354.409517  | -0.417635206 | 0.146118304 | -2.858199099 | 0.00426053  | 0.062433091 | tnc              | ZDB-GENE-980526-104  | tnc              |
| ENSDARG00000057772 | 46.16165597 | -0.558604587 | 0.195443337 | -2.858140864 | 0.004261312 | 0.062433091 | march7           | ZDB-GENE-080204-121  | march7           |
| ENSDARG00000088625 | 209.8487272 | 0.606158491  | 0.212109384 | 2.857763666  | 0.004266638 | 0.062456323 | si:ch211-142d6.2 | ZDB-GENE-141216-119  | si:ch211-142d6.2 |
| ENSDARG00000071629 | 43.80482191 | 0.465332927  | 0.162888502 | 2.856757369  | 0.004279929 | 0.062603557 | BX511034.1       |                      |                  |
| ENSDARG00000027916 | 64.33863714 | -0.377033035 | 0.132008053 | -2.856136614 | 0.004288306 | 0.062674969 | fntb             | ZDB-GENE-030131-2220 | fntb             |
| ENSDARG00000079745 | 375.7145657 | -0.320901252 | 0.112366524 | -2.855843902 | 0.004292261 | 0.062681692 | si:ch211-166a6.5 | ZDB-GENE-030131-9913 | si:ch211-166a6.5 |
| ENSDARG00000091555 | 243.0275701 | 0.267188016  | 0.093599819 | 2.854578339  | 0.0043094   | 0.062865692 | ostf1            | ZDB-GENE-040625-157  | ostf1            |
| ENSDARG00000102127 | 11.93587862 | -0.748241874 | 0.262136656 | -2.854396195 | 0.004311872 | 0.062865692 | NHLRC3           |                      |                  |
| ENSDARG00000034080 | 131.6774956 | 0.335320992  | 0.1174978   | 2.853849106  | 0.004319304 | 0.062922578 | plcd1b           | ZDB-GENE-030131-9435 | plcd1b           |
| ENSDARG00000089087 | 4302.394839 | -0.643052586 | 0.225348412 | -2.853592708 | 0.004322791 | 0.062922578 | hbba1            | ZDB-GENE-990415-18   | hbba1            |
| ENSDARG00000029856 | 82.93611862 | 0.383340716  | 0.134391762 | 2.852412311  | 0.004338878 | 0.063105517 | cnn3b            | ZDB-GENE-050522-263  | cnn3b            |
| ENSDARG00000042322 | 188.2040876 | 0.368801862  | 0.129334695 | 2.851530757  | 0.004350928 | 0.063229486 | si:dkey-177p2.6  | ZDB-GENE-030131-5926 | si:dkey-177p2.6  |
| ENSDARG00000069018 | 980.4652397 | 0.712612825  | 0.250036415 | 2.850036164  | 0.004371426 | 0.063436916 | cyp7a1           | ZDB-GENE-040426-1296 | cyp7a1           |
| ENSDARG00000100260 | 31.18416095 | -0.504877093 | 0.17715661  | -2.849891367 | 0.004373416 | 0.063436916 | them6            | ZDB-GENE-070912-340  | them6            |
| ENSDARG00000061131 | 175.819317  | -0.386190266 | 0.13551881  | -2.849717065 | 0.004375814 | 0.063436916 | kif21a           | ZDB-GENE-110411-237  | kif21a           |
| ENSDARG00000051925 | 237.142125  | 0.524971573  | 0.184241459 | 2.849367218  | 0.004380629 | 0.063455423 | cyb5r2           | ZDB-GENE-060825-83   | cyb5r2           |
| ENSDARG00000042934 | 114.8997438 | -0.400112572 | 0.140434705 | -2.849100379 | 0.004384305 | 0.063457412 | ccn2a            | ZDB-GENE-030131-102  | ccn2a            |
| ENSDARG00000104832 | 7.752489772 | 0.936836353  | 0.32889018  | 2.848477726  | 0.004392893 | 0.063503372 | CU914164.1       |                      |                  |
| ENSDARG00000059690 | 9.396641339 | -0.858922123 | 0.301555898 | -2.848301526 | 0.004395326 | 0.063503372 | slc29a4          | ZDB-GENE-070112-1932 | slc29a4          |
| ENSDARG00000086223 | 21.08578198 | 0.550721729  | 0.193364571 | 2.848100496  | 0.004398103 | 0.063503372 | si:ch73-144d13.4 | ZDB-GENE-131120-182  | si:ch73-144d13.4 |
| ENSDARG00000078322 | 2359.620385 | -0.485555287 | 0.170603208 | -2.846108783 | 0.004425707 | 0.06385053  | col12a1a         | ZDB-GENE-090728-1    | col12a1a         |
| ENSDARG00000004227 | 78.82268835 | -0.425751426 | 0.149671871 | -2.844565394 | 0.004447206 | 0.064098439 | pde3a            | ZDB-GENE-041210-23   | pde3a            |
| ENSDARG00000042989 | 54.91404493 | 0.331405516  | 0.11651311  | 2.844362459  | 0.004450039 | 0.064098439 | si:dkeyp-84f3.5  | ZDB-GENE-050208-162  | si:dkeyp-84f3.5  |
| ENSDARG00000034189 | 148.6073241 | 0.321200647  | 0.113003343 | 2.842399519  | 0.004477534 | 0.064442714 | oxsr1a           | ZDB-GENE-070620-25   | oxsr1a           |
| ENSDARG00000063435 | 84.29200412 | -0.444701269 | 0.156554859 | -2.840545935 | 0.004503639 | 0.064766441 | trpm4b.2         | ZDB-GENE-061214-2    | trpm4b.2         |
| ENSDARG00000076991 | 20.89510959 | 0.541897123  | 0.190827555 | 2.839721562  | 0.004515293 | 0.064882006 | dolk             | ZDB-GENE-070410-59   | dolk             |
| ENSDARG00000056210 | 5.159211051 | 1.289215101  | 0.45404113  | 2.839423605  | 0.004519512 | 0.064890633 | si:ch211-199o1.2 | ZDB-GENE-060503-867  | si:ch211-199o1.2 |
| ENSDARG00000078658 | 22.34070462 | -0.548167009 | 0.193136791 | -2.838231935 | 0.004536421 | 0.065036981 | supt20           | ZDB-GENE-091204-264  | supt20           |
| ENSDARG00000005861 | 224.3031786 | 0.297439291  | 0.104798782 | 2.838194145  | 0.004536958 | 0.065036981 | ralgapa2         | ZDB-GENE-131122-56   | ralgapa2         |
| ENSDARG00000025436 | 107.4135014 | -0.400842918 | 0.14125023  | -2.83782134  | 0.00454226  | 0.065060981 | msrb1a           | ZDB-GENE-030411-3    | msrb1a           |
| ENSDARG00000038321 | 112.5910405 | 0.668379318  | 0.235574494 | 2.837231263  | 0.004550664 | 0.065089801 | zgc:172053       | ZDB-GENE-080219-25   | zgc:172053       |
| ENSDARG00000058725 | 9.354173695 | 2.25262862   | 0.793970153 | 2.837170403  | 0.004551531 | 0.065089801 | rfesd            | ZDB-GENE-050417-254  | rfesd            |
| ENSDARG00000044808 | 56.61945404 | 0.438541292  | 0.154680769 | 2.835137783  | 0.004580593 | 0.0654532   | slc4a4b          | ZDB-GENE-091030-1    | slc4a4b          |
| ENSDARG00000040433 | 25.61362374 | -2.140420777 | 0.755077976 | -2.834701642 | 0.00458685  | 0.065472067 | cyp2k22          | ZDB-GENE-040426-822  | cyp2k22          |
| ENSDARG00000099631 | 205.1172742 | 0.277115334  | 0.097763881 | 2.834536969  | 0.004589215 | 0.065472067 | cmtm6            | ZDB-GENE-030729-15   | cmtm6            |
| ENSDARG00000098918 | 11.24274348 | -0.820028413 | 0.289493953 | -2.832627093 | 0.004616721 | 0.065812128 | mcoln2           | ZDB-GENE-040426-692  | mcoln2           |
| ENSDARG00000095360 | 43.10927868 | 0.641698719  | 0.226704951 | 2.830545672  | 0.004646868 | 0.066189259 | si:ch211-213b8.4 | ZDB-GENE-090313-82   | si:ch211-213b8.4 |
| ENSDARG00000076781 | 18.89588907 | 0.543138696  | 0.191995    | 2.82892104   | 0.004670522 | 0.06647339  | trim45           | ZDB-GENE-070912-389  | trim45           |
| ENSDARG00000079637 | 100.3848599 | -0.610288028 | 0.215779151 | -2.82829933  | 0.004679603 | 0.066498399 | alpk2            | ZDB-GENE-030131-1868 | alpk2            |
| ENSDARG00000012632 | 122.3880477 | 0.695960737  | 0.246070948 | 2.828292993  | 0.004679696 | 0.066498399 | zgc:92749        | ZDB-GENE-040718-309  | zgc:92749        |
| ENSDARG00000095288 | 234.1403968 | -0.307644894 | 0.108917851 | -2.824558987 | 0.004734573 | 0.067224942 | rusc2            | ZDB-GENE-060526-131  | rusc2            |
| ENSDARG00000004189 | 147.918719  | 0.401983681  | 0.142332649 | 2.824254904  | 0.004739068 | 0.067235525 | cbx1a            | ZDB-GENE-030131-4945 | cbx1a            |
| ENSDARG00000100536 | 84.07919406 | 0.355231864  | 0.125891189 | 2.821737292  | 0.004776429 | 0.067712012 | nkrf             | ZDB-GENE-030616-73   | nkrf             |
| ENSDARG00000077811 | 94.68073447 | 0.441038293  | 0.156327165 | 2.821251783  | 0.004783664 | 0.067761018 | sox11a           | ZDB-GENE-980526-395  | sox11a           |

|                    |             |              |             |              |             |             |                   |                      |                   |
|--------------------|-------------|--------------|-------------|--------------|-------------|-------------|-------------------|----------------------|-------------------|
| ENSDARG00000095901 | 144.919442  | -0.432269863 | 0.153277546 | -2.82017734  | 0.004799712 | 0.067934671 | col18a1b          | ZDB-GENE-110411-288  | col18a1b          |
| ENSDARG00000102878 | 85.74293852 | 0.402221904  | 0.142670514 | 2.819236371  | 0.004813806 | 0.068080422 | mapre3b           | ZDB-GENE-040704-6    | mapre3b           |
| ENSDARG00000012776 | 75.27108668 | 0.404575839  | 0.143540606 | 2.818546272  | 0.004824166 | 0.068173179 | smarca1           | ZDB-GENE-070705-296  | smarca1           |
| ENSDARG00000077549 | 46.39991986 | 0.474305121  | 0.168364789 | 2.817127757  | 0.004845525 | 0.068421098 | aifm2             | ZDB-GENE-050506-76   | aifm2             |
| ENSDARG00000100823 | 139.5887881 | -0.415580869 | 0.147564785 | -2.816260456 | 0.004858626 | 0.068552117 | selenok           | ZDB-GENE-040912-131  | selenok           |
| ENSDARG00000042409 | 53.24787511 | -0.410315912 | 0.145754628 | -2.81511412  | 0.004875992 | 0.068743047 | RALGDS            | ZDB-GENE-081105-110  | si:ch211-251j10.3 |
| ENSDARG00000104084 | 97.99573109 | 0.551588757  | 0.196102888 | 2.812751833  | 0.004911954 | 0.069195662 | si:dkey-191g9.7   | ZDB-GENE-141216-135  | si:dkey-191g9.7   |
| ENSDARG00000113660 | 26.48365178 | 0.569197661  | 0.202429335 | 2.811833874  | 0.004925994 | 0.069284005 | si:ch211-196f19.1 | ZDB-GENE-081103-47   | si:ch211-196f19.1 |
| ENSDARG00000097824 | 62.43356872 | 0.4183915    | 0.148797103 | 2.811825573  | 0.004926121 | 0.069284005 | smco4             | ZDB-GENE-131121-542  | smco4             |
| ENSDARG00000016088 | 31.86267962 | -0.619421989 | 0.220310653 | -2.811584367 | 0.004929816 | 0.069284005 | rtn2a             | ZDB-GENE-060420-1    | rtn2a             |
| ENSDARG00000100752 | 149.5211633 | 0.27440633   | 0.097705336 | 2.808509151  | 0.004977147 | 0.069894419 | rab21             | ZDB-GENE-060929-1062 | rab21             |
| ENSDARG00000061272 | 132.0193934 | -0.440250933 | 0.156782567 | -2.808034976 | 0.004984481 | 0.069916469 | BX294434.1        |                      |                   |
| ENSDARG00000099175 | 444.9950011 | 0.261171544  | 0.093023728 | 2.807579849  | 0.00499153  | 0.069916469 | hmgbl1a           | ZDB-GENE-030131-341  | hmgbl1a           |
| ENSDARG00000102493 | 44.09247011 | 0.409923382  | 0.14601204  | 2.807462873  | 0.004993344 | 0.069916469 | ticam1            | ZDB-GENE-040219-2    | ticam1            |
| ENSDARG00000043328 | 14.77866339 | -0.986292592 | 0.351318817 | -2.80740041  | 0.004994312 | 0.069916469 | fip1l1a           | ZDB-GENE-041014-8    | fip1l1a           |
| ENSDARG00000003776 | 109.5084174 | 0.25787967   | 0.091914587 | 2.805644656  | 0.005021604 | 0.070243695 | pip4k2aa          | ZDB-GENE-080721-18   | pip4k2aa          |
| ENSDARG00000097102 | 494.7045111 | 0.418485116  | 0.149200076 | 2.804858596  | 0.005033866 | 0.070307174 | si:ch73-281n10.2  | ZDB-GENE-131120-172  | si:ch73-281n10.2  |
| ENSDARG00000039605 | 1217.452887 | -0.358703358 | 0.127886867 | -2.804849061 | 0.005034015 | 0.070307174 | mat1a             | ZDB-GENE-030131-6127 | mat1a             |
| ENSDARG00000053068 | 732.0733712 | 0.519256712  | 0.185144649 | 2.804600161  | 0.005037903 | 0.070307174 | cyp8b1            | ZDB-GENE-040808-53   | cyp8b1            |
| ENSDARG00000077037 | 106.9705962 | 0.319430841  | 0.11391429  | 2.804133187  | 0.005045206 | 0.070311844 | txlna             | ZDB-GENE-030131-2900 | txlna             |
| ENSDARG00000037960 | 137.8303373 | -0.314532974 | 0.112169863 | -2.804077368 | 0.005046079 | 0.070311844 | lrrc17            | ZDB-GENE-030131-9774 | lrrc17            |
| ENSDARG00000077092 | 63.90115307 | 0.366741946  | 0.13081923  | 2.803425352  | 0.005056294 | 0.070359711 | elk4              | ZDB-GENE-030716-1    | elk4              |
| ENSDARG00000074185 | 48.29563838 | 0.558407614  | 0.199192456 | 2.803357238  | 0.005057362 | 0.070359711 | pcsk9             | ZDB-GENE-060927-1    | pcsk9             |
| ENSDARG00000018968 | 67.09118011 | -0.364700732 | 0.130250749 | -2.799989519 | 0.005110427 | 0.071042853 | acvr1ba           | ZDB-GENE-980526-527  | acvr1ba           |
| ENSDARG00000071429 | 1199.382853 | -0.36059897  | 0.128851439 | -2.798563775 | 0.005133043 | 0.071300979 | tdo2a             | ZDB-GENE-030131-1187 | tdo2a             |
| ENSDARG00000038297 | 31.91894154 | 0.573681287  | 0.205009306 | 2.798318272  | 0.005136947 | 0.071300979 | aspdh             | ZDB-GENE-040912-102  | aspdh             |
| ENSDARG00000089489 | 19.53608002 | -0.677073972 | 0.242018226 | -2.797615624 | 0.005148134 | 0.071400992 | fam83e            | ZDB-GENE-141215-21   | fam83e            |
| ENSDARG00000062447 | 13.81240789 | -0.773172588 | 0.276437582 | -2.796915606 | 0.005159301 | 0.071478933 | hecw2a            | ZDB-GENE-090311-22   | hecw2a            |
| ENSDARG00000071790 | 6.156026569 | 1.058355029  | 0.378421312 | 2.796763808  | 0.005161725 | 0.071478933 | znf1153           | ZDB-GENE-071004-83   | znf1153           |
| ENSDARG00000079591 | 117.7783598 | 0.27108157   | 0.09699212  | 2.794882415  | 0.00519186  | 0.071840754 | si:ch211-203d1.3  | ZDB-GENE-160113-15   | si:ch211-203d1.3  |
| ENSDARG00000017321 | 81.63884721 | -0.391785912 | 0.140210295 | -2.794273512 | 0.005201646 | 0.071920681 | kdr               | ZDB-GENE-041001-112  | kdr               |
| ENSDARG00000007709 | 23.32260817 | -0.547327542 | 0.196063008 | -2.791590044 | 0.005244976 | 0.072412266 | adamts8a          | ZDB-GENE-060526-202  | adamts8a          |
| ENSDARG00000008275 | 138.597484  | -0.534742608 | 0.191556118 | -2.791571548 | 0.005245276 | 0.072412266 | klhl24b           | ZDB-GENE-040426-1185 | klhl24b           |
| ENSDARG00000074319 | 41.32107924 | -0.465486346 | 0.166868178 | -2.789545324 | 0.005278211 | 0.072810888 | sall1a            | ZDB-GENE-020228-2    | sall1a            |
| ENSDARG00000038248 | 80.89083312 | 0.415076207  | 0.14902191  | 2.785336787  | 0.005347215 | 0.073617046 | ggact.2           | ZDB-GENE-040912-8    | ggact.2           |
| ENSDARG00000020301 | 199.6410634 | 0.358513825  | 0.128716829 | 2.785291004  | 0.00534797  | 0.073617046 | os9               | ZDB-GENE-060929-32   | os9               |
| ENSDARG00000101908 | 43.14594781 | -0.441480692 | 0.158507768 | -2.785230635 | 0.005348966 | 0.073617046 | rab3ip            | ZDB-GENE-050522-323  | rab3ip            |
| ENSDARG00000077101 | 73.18274016 | 0.3047954    | 0.109513481 | 2.783176987  | 0.005382943 | 0.0739201   | zbtb10            | ZDB-GENE-030429-10   | zbtb10            |
| ENSDARG00000055652 | 28.68375933 | -0.492106732 | 0.176827854 | -2.782970683 | 0.005386367 | 0.0739201   | aclyb             | ZDB-GENE-090909-2    | aclyb             |
| ENSDARG00000062799 | 49.37782159 | -0.418162463 | 0.150259086 | -2.782942933 | 0.005386828 | 0.0739201   | baiap2a           | ZDB-GENE-060421-2756 | baiap2a           |
| ENSDARG00000088836 | 43.56994032 | 1.119958968  | 0.402442541 | 2.782904003  | 0.005387474 | 0.0739201   | si:ch211-76m11.5  | ZDB-GENE-041210-278  | si:ch211-76m11.5  |
| ENSDARG00000092033 | 40.82827238 | -0.740571435 | 0.266189753 | -2.782118494 | 0.005400532 | 0.073988278 | si:dkey-239h2.3   | ZDB-GENE-081104-383  | si:dkey-239h2.3   |
| ENSDARG00000095904 | 46.78712853 | 0.441191636  | 0.158581738 | 2.782108713  | 0.005400695 | 0.073988278 | prpf31            | ZDB-GENE-040426-1561 | prpf31            |
| ENSDARG00000016350 | 126.8245991 | 0.272755556  | 0.098078193 | 2.781001044  | 0.005419156 | 0.074184526 | cap1              | ZDB-GENE-030131-6459 | cap1              |
| ENSDARG00000007836 | 644.5799523 | -0.323429942 | 0.116339134 | -2.780061452 | 0.005434861 | 0.074342767 | ctsla             | ZDB-GENE-030131-106  | ctsla             |
| ENSDARG00000052470 | 316.8740193 | -0.382859804 | 0.137766735 | -2.77904389  | 0.005451916 | 0.0744519   | igfbp2a           | ZDB-GENE-000125-12   | igfbp2a           |
| ENSDARG00000094579 | 23.95893375 | 0.629375227  | 0.226489073 | 2.778832632  | 0.005455463 | 0.0744519   | b4galnt2.1        | ZDB-GENE-030131-9081 | b4galnt2.1        |
| ENSDARG00000079350 | 115.5619092 | 0.297984719  | 0.107237155 | 2.778745101  | 0.005456933 | 0.0744519   | znf654            | ZDB-GENE-030131-1423 | znf654            |
| ENSDARG00000010816 | 14.55165171 | -0.634134456 | 0.22822122  | -2.778595504 | 0.005459446 | 0.0744519   | slc7a14a          | ZDB-GENE-070912-112  | slc7a14a          |

|                     |             |              |             |              |             |             |                   |                      |                   |
|---------------------|-------------|--------------|-------------|--------------|-------------|-------------|-------------------|----------------------|-------------------|
| ENSDARG00000095086  | 29.40460462 | 0.512512413  | 0.184597056 | 2.776384542  | 0.005496715 | 0.074903189 | cfdp1             | ZDB-GENE-030131-5736 | cfdp1             |
| ENSDARG00000038787  | 93.84691961 | -0.325766005 | 0.117378363 | -2.775349714 | 0.005514238 | 0.07508491  | tmub1             | ZDB-GENE-040426-2504 | tmub1             |
| ENSDARG00000060374  | 14.87791747 | -0.772461039 | 0.278377725 | -2.774866562 | 0.005522436 | 0.075104941 | ttll11            | ZDB-GENE-061013-747  | ttll11            |
| ENSDARG00000013752  | 5794.49388  | 0.552657544  | 0.199172418 | 2.774769464  | 0.005524085 | 0.075104941 | tnni2a.3          | ZDB-GENE-040718-80   | tnni2a.3          |
| ENSDARG00000058498  | 25.10305038 | -0.67305399  | 0.242633788 | -2.773949974 | 0.005538019 | 0.075232596 | slc9a3.1          | ZDB-GENE-060503-545  | slc9a3.1          |
| ENSDARG00000073850  | 20.17964016 | -0.575368669 | 0.207435432 | -2.773724154 | 0.005541865 | 0.075232596 | hdac7b            | ZDB-GENE-131127-113  | hdac7b            |
| ENSDARG0000003699   | 145.6960211 | -0.286365719 | 0.103256589 | -2.773340865 | 0.005548397 | 0.075264299 | atp7a             | ZDB-GENE-060825-45   | atp7a             |
| ENSDARG00000078992  | 361.6250766 | 0.264125467  | 0.095260114 | 2.772676377  | 0.005559738 | 0.075361137 | wnk1a             | ZDB-GENE-080917-49   | wnk1a             |
| ENSDARG00000015495  | 162.5172567 | -0.39140633  | 0.14120625  | -2.771876815 | 0.005573412 | 0.075489429 | kif3              | ZDB-GENE-011116-1    | kif3              |
| ENSDARG00000062579  | 46.4175923  | -0.398592689 | 0.14385215  | -2.770849723 | 0.005591022 | 0.075670796 | kremen1           | ZDB-GENE-070705-262  | kremen1           |
| ENSDARG00000067851  | 57.08642536 | -0.548289029 | 0.197904516 | -2.770472547 | 0.005597502 | 0.075701358 | lcn15             | ZDB-GENE-060825-349  | lcn15             |
| ENSDARG00000025467  | 53.60648489 | -0.499229793 | 0.180234303 | -2.769893335 | 0.005607465 | 0.075778956 | aatf              | ZDB-GENE-030131-9654 | aatf              |
| ENSDARG000000102308 | 72.60954828 | 0.327227589  | 0.118258746 | 2.767047685  | 0.005656648 | 0.076341298 | ttc39c            | ZDB-GENE-050522-194  | ttc39c            |
| ENSDARG00000102750  | 664.7308348 | 0.250859885  | 0.090661543 | 2.766993327  | 0.005657591 | 0.076341298 | cdh1              | ZDB-GENE-010606-1    | cdh1              |
| ENSDARG00000091317  | 11.14848669 | -0.730971609 | 0.264245081 | -2.766263828 | 0.005670264 | 0.076407912 | hunk              | ZDB-GENE-050309-240  | hunk              |
| ENSDARG00000078887  | 173.8782336 | 0.413720194  | 0.149561638 | 2.766218659  | 0.00567105  | 0.076407912 | atp10d            | ZDB-GENE-090313-231  | atp10d            |
| ENSDARG00000092071  | 132.982124  | 0.457143989  | 0.165290783 | 2.765695596  | 0.005680153 | 0.076448075 | si:ch211-117n7.6  | ZDB-GENE-060503-474  | si:ch211-117n7.6  |
| ENSDARG00000056643  | 28.35010268 | -0.689918145 | 0.249468005 | -2.765557626 | 0.005682556 | 0.076448075 | slc22a7b.1        | ZDB-GENE-040426-1311 | slc22a7b.1        |
| ENSDARG00000043492  | 7.673014846 | 0.824883197  | 0.298334748 | 2.7649585    | 0.005693004 | 0.076531212 | irf1a             | ZDB-GENE-060421-4031 | irf1a             |
| ENSDARG00000012405  | 31459.11837 | -0.413164424 | 0.149445314 | -2.764652924 | 0.005698339 | 0.076545554 | col1a1a           | ZDB-GENE-030131-9102 | col1a1a           |
| ENSDARG00000031506  | 74.46191373 | 0.458456653  | 0.165862409 | 2.764078106  | 0.005708387 | 0.076576299 | flvcr2b           | ZDB-GENE-041210-312  | flvcr2b           |
| ENSDARG00000020744  | 6.007821531 | 0.921286915  | 0.333312502 | 2.764033478  | 0.005709168 | 0.076576299 | bdkrb1            | ZDB-GENE-030814-1    | bdkrb1            |
| ENSDARG00000091503  | 29.1866535  | -0.529619074 | 0.191628955 | -2.763773749 | 0.005713714 | 0.076579998 | CABZ01073954.1    |                      |                   |
| ENSDARG00000011671  | 5.260553572 | 1.393724179  | 0.504391672 | 2.76317841   | 0.005724147 | 0.076588316 | pde6b             | ZDB-GENE-090421-2    | pde6b             |
| ENSDARG00000077096  | 5.611399919 | -0.998726825 | 0.361501946 | -2.762714934 | 0.005732281 | 0.076588316 | fn/dc7a           | ZDB-GENE-070216-2    | fn/dc7a           |
| ENSDARG00000054304  | 43.67519139 | 0.650313402  | 0.235390196 | 2.762703855  | 0.005732475 | 0.076588316 | homeza            | ZDB-GENE-030616-592  | homeza            |
| ENSDARG00000098764  | 52.2828142  | -0.541344844 | 0.195948039 | -2.762695902 | 0.005732615 | 0.076588316 | musk              | ZDB-GENE-030131-6458 | musk              |
| ENSDARG00000041083  | 922.3874323 | 0.424217783  | 0.153561836 | 2.762520903  | 0.005735689 | 0.076588316 | anpepa            | ZDB-GENE-030131-4781 | anpepa            |
| ENSDARG00000054849  | 122.2353631 | -0.275121384 | 0.099602712 | -2.762187688 | 0.005741546 | 0.076609486 | bcat2             | ZDB-GENE-040718-425  | bcat2             |
| ENSDARG00000030844  | 111.4446031 | -0.493135843 | 0.178585292 | -2.761346341 | 0.00575636  | 0.076750036 | klf11a            | ZDB-GENE-030131-3568 | klf11a            |
| ENSDARG00000098293  | 25.84758635 | 0.642240186  | 0.232680492 | 2.760180627  | 0.005776941 | 0.076967225 | si:dkey-27i16.2   | ZDB-GENE-030131-9667 | si:dkey-27i16.2   |
| ENSDARG000000112691 | 7.851675653 | -0.840313269 | 0.304504907 | -2.759605019 | 0.005787128 | 0.077045711 | st7               | ZDB-GENE-060421-2807 | st7               |
| ENSDARG00000004082  | 43.63122837 | -0.507818078 | 0.184060907 | -2.758967601 | 0.005798428 | 0.077138884 | cx39.9            | ZDB-GENE-040406-2    | cx39.9            |
| ENSDARG00000062873  | 13.04807441 | -0.696055829 | 0.252515483 | -2.756487724 | 0.005842581 | 0.077668642 | slc2a11l          | ZDB-GENE-061215-118  | slc2a11l          |
| ENSDARG00000054438  | 164.3886574 | 0.311824444  | 0.113164142 | 2.755505745  | 0.005860148 | 0.077831957 | fzd2              | ZDB-GENE-990415-224  | fzd2              |
| ENSDARG00000069589  | 29.96896802 | 0.496680082  | 0.180262471 | 2.755316071  | 0.005863546 | 0.077831957 | tmem222a          | ZDB-GENE-050306-17   | tmem222a          |
| ENSDARG00000034309  | 110.4199968 | -0.382918298 | 0.139025843 | -2.754295814 | 0.005881858 | 0.078017276 | cox10             | ZDB-GENE-041111-239  | cox10             |
| ENSDARG00000005359  | 463.7898582 | -0.24597798  | 0.089372132 | -2.752289492 | 0.005918018 | 0.07843889  | sucla2            | ZDB-GENE-040426-1963 | sucla2            |
| ENSDARG00000097055  | 93.37116912 | -0.389778536 | 0.141652251 | -2.751657902 | 0.005929443 | 0.078532271 | si:ch211-284f22.3 | ZDB-GENE-060526-166  | si:ch211-284f22.3 |
| ENSDARG00000079078  | 9236.835464 | -0.761797559 | 0.276906074 | -2.751104553 | 0.005939468 | 0.078607    | si:ch211-5k11.8   | ZDB-GENE-131121-640  | si:ch211-5k11.8   |
| ENSDARG00000095918  | 19.30520773 | 0.758665573  | 0.276041857 | 2.748371499  | 0.005989211 | 0.079173473 | si:ch211-274k16.9 | ZDB-GENE-110408-30   | si:ch211-274k16.9 |
| ENSDARG00000077237  | 87.34234328 | -0.500445222 | 0.182100628 | -2.748179557 | 0.005992718 | 0.079173473 | rxf7a             | ZDB-GENE-100309-3    | rxf7a             |
| ENSDARG00000071570  | 38.15592324 | 0.389633286  | 0.14178658  | 2.748026552  | 0.005995515 | 0.079173473 | si:dkeyp-87e7.4   | ZDB-GENE-030131-6208 | si:dkeyp-87e7.4   |
| ENSDARG00000037968  | 39.31191964 | 0.446562181  | 0.162585034 | 2.746637679  | 0.006020961 | 0.079426227 | fus               | ZDB-GENE-040426-1010 | fus               |
| ENSDARG00000067672  | 8.141842043 | 1.411529146  | 0.513937682 | 2.746498642  | 0.006023514 | 0.079426227 | card9             | ZDB-GENE-060531-94   | card9             |
| ENSDARG00000034270  | 941.4814676 | -0.267741155 | 0.097507586 | -2.745849496 | 0.006035444 | 0.079525073 | ogdha             | ZDB-GENE-030131-2143 | ogdha             |
| ENSDARG00000046012  | 157.4170944 | -0.489307081 | 0.178244083 | -2.745151884 | 0.00604829  | 0.079635816 | slc47a1           | ZDB-GENE-050327-20   | slc47a1           |
| ENSDARG00000011897  | 104.8015772 | 0.309346591  | 0.112714818 | 2.744506856  | 0.006060189 | 0.079733945 | tsg101b           | ZDB-GENE-130530-542  | tsg101b           |
| ENSDARG00000041226  | 55.08684638 | -0.357746692 | 0.130479679 | -2.7417809   | 0.006110709 | 0.08031949  | cdc40             | ZDB-GENE-050116-3    | cdc40             |

|                     |             |              |             |              |             |             |                   |                      |                   |
|---------------------|-------------|--------------|-------------|--------------|-------------|-------------|-------------------|----------------------|-------------------|
| ENSDARG0000002840   | 105.8490199 | 0.353668899  | 0.12899984  | 2.741622764  | 0.006113651 | 0.08031949  | si:dkey-28b4.8    | ZDB-GENE-090501-2    | si:dkey-28b4.8    |
| ENSDARG00000017058  | 119.4280841 | 0.377852101  | 0.137856357 | 2.740911695  | 0.006126897 | 0.080380584 | large2            | ZDB-GENE-050419-253  | large2            |
| ENSDARG00000058945  | 139.8930739 | 0.478436254  | 0.174554951 | 2.740891921  | 0.006127266 | 0.080380584 | acot22            | ZDB-GENE-110407-17   | acot22            |
| ENSDARG00000036942  | 433.0267425 | 0.415170175  | 0.151655413 | 2.737588893  | 0.006189139 | 0.081132918 | gpd1c             | ZDB-GENE-040426-2576 | gpd1c             |
| ENSDARG00000029439  | 502.3878209 | -0.588103167 | 0.214907914 | -2.73653565  | 0.006208987 | 0.081333644 | atp2a2a           | ZDB-GENE-040426-702  | atp2a2a           |
| ENSDARG00000000369  | 12.95088165 | -0.691015318 | 0.252553592 | -2.736113601 | 0.006216956 | 0.081348548 | prkg3b            | ZDB-GENE-060421-6938 | prkg3b            |
| ENSDARG00000053829  | 9.609557307 | 0.718758687  | 0.262723365 | 2.735800403  | 0.006222876 | 0.081348548 | pax9              | ZDB-GENE-980526-399  | pax9              |
| ENSDARG00000055092  | 132.8066616 | -0.263162414 | 0.096193704 | -2.735755066 | 0.006223733 | 0.081348548 | pora              | ZDB-GENE-050809-121  | pora              |
| ENSDARG00000068973  | 81.95440171 | 0.31210624   | 0.114108778 | 2.735164167  | 0.006234917 | 0.081435375 | pdlim4            | ZDB-GENE-070308-5    | pdlim4            |
| ENSDARG00000098239  | 19.46813455 | 0.627613774  | 0.229550301 | 2.734101288  | 0.006255508 | 0.081639264 | zgc:85932         | ZDB-GENE-040426-2460 | zgc:85932         |
| ENSDARG00000004618  | 36.51495357 | 0.548405404  | 0.200642325 | 2.733248842  | 0.006271293 | 0.081791346 | stx2a             | ZDB-GENE-040801-80   | stx2a             |
| ENSDARG00000076981  | 121.1053758 | 0.478751759  | 0.175215774 | 2.732355366  | 0.006288327 | 0.081934074 | zgc:198329        | ZDB-GENE-080226-6    | zgc:198329        |
| ENSDARG00000025032  | 285.6760257 | 0.234168349  | 0.085712382 | 2.732024744  | 0.006294641 | 0.081934074 | nr3c1             | ZDB-GENE-050522-503  | nr3c1             |
| ENSDARG00000090600  | 138.0782812 | 0.295858601  | 0.108295498 | 2.731956596  | 0.006295943 | 0.081934074 | si:ch211-213a13.1 | ZDB-GENE-050208-471  | si:ch211-213a13.1 |
| ENSDARG00000033854  | 65.19031597 | 0.579582097  | 0.212240203 | 2.730783748  | 0.006318392 | 0.082141765 | abrab             | ZDB-GENE-040822-7    | abrab             |
| ENSDARG00000038822  | 165.7907943 | -0.453260823 | 0.165990425 | -2.730644389 | 0.006321064 | 0.082141765 | mrc1b             | ZDB-GENE-070705-13   | mrc1b             |
| ENSDARG00000020164  | 143.9492595 | 0.338289967  | 0.123951712 | 2.72920771   | 0.00634867  | 0.082440769 | efnb2a            | ZDB-GENE-990415-67   | efnb2a            |
| ENSDARG00000012640  | 124.2928023 | 0.357375862  | 0.130969154 | 2.728702523  | 0.006358403 | 0.082507415 | cideb             | ZDB-GENE-080514-2    | cideb             |
| ENSDARG00000043175  | 736.2395396 | 0.650674043  | 0.238495213 | 2.728247814  | 0.006367175 | 0.082561502 | CELA1 (1 of many) | ZDB-GENE-050522-187  | zgc:112368        |
| ENSDARG00000012539  | 164.8066131 | 0.589056085  | 0.215990175 | 2.727235553  | 0.006386743 | 0.082755539 | dnase1            | ZDB-GENE-040718-423  | dnase1            |
| ENSDARG00000068784  | 62.1978199  | 0.482280072  | 0.176870276 | 2.726744613  | 0.006396252 | 0.082796263 | vsir              | ZDB-GENE-060929-716  | vsir              |
| ENSDARG00000076144  | 62.01554888 | 0.468664413  | 0.171886262 | 2.726596115  | 0.006399131 | 0.082796263 | si:ch211-74m13.3  | ZDB-GENE-060503-219  | si:ch211-74m13.3  |
| ENSDARG00000055591  | 76.68943826 | 0.614238557  | 0.225436503 | 2.724663265  | 0.00643671  | 0.083189155 | pipox             | ZDB-GENE-110627-2    | pipox             |
| ENSDARG00000076296  | 124.5092469 | 0.30629707   | 0.112420856 | 2.724557349  | 0.006438775 | 0.083189155 | trirq             |                      |                   |
| ENSDARG00000014059  | 51.35091304 | -0.40291602  | 0.147940835 | -2.723494293 | 0.006459533 | 0.08339727  | cldn5b            | ZDB-GENE-041010-140  | cldn5b            |
| ENSDARG00000076939  | 78.9534155  | -0.417765408 | 0.15340871  | -2.723218306 | 0.006464932 | 0.083406928 | znf451            | ZDB-GENE-081107-14   | znf451            |
| ENSDARG000000116743 | 4.442211201 | -1.605586916 | 0.589660379 | -2.722901137 | 0.006471142 | 0.083427023 | rnps1             | ZDB-GENE-030131-5228 | rnps1             |
| ENSDARG00000012281  | 70.05077484 | -0.525989098 | 0.193321017 | -2.720806597 | 0.006512285 | 0.083897132 | zgc:65851         | ZDB-GENE-030131-9669 | zgc:65851         |
| ENSDARG00000076451  | 145.8901894 | 0.245511175  | 0.09034935  | 2.717354082  | 0.006580617 | 0.08471658  | prdm2b            | ZDB-GENE-080613-3    | prdm2b            |
| ENSDARG00000021866  | 92.79452445 | -0.513592632 | 0.189027009 | -2.717033057 | 0.006587003 | 0.084737964 | upk1a             | ZDB-GENE-060421-2603 | upk1a             |
| ENSDARG00000070391  | 70.18610175 | 0.339328178  | 0.124925963 | 2.716234234  | 0.006602918 | 0.084867416 | tspan4b           | ZDB-GENE-070410-127  | tspan4b           |
| ENSDARG00000068096  | 44.87016877 | -0.422838256 | 0.15568114  | -2.716053178 | 0.006606531 | 0.084867416 | atf5a             | ZDB-GENE-060526-205  | atf5a             |
| ENSDARG00000094606  | 11.92995383 | 0.792113627  | 0.291734315 | 2.715188394  | 0.006623808 | 0.084940039 | si:zfos-364h11.2  | ZDB-GENE-120703-46   | si:zfos-364h11.2  |
| ENSDARG00000074533  | 91.44543731 | 0.431617042  | 0.158976083 | 2.714980989  | 0.006627958 | 0.084940039 | slc25a38b         | ZDB-GENE-110214-1    | slc25a38b         |
| ENSDARG00000077785  | 393.8819495 | 0.37742307   | 0.139022535 | 2.714833738  | 0.006630905 | 0.084940039 | atf5b             | ZDB-GENE-030131-2637 | atf5b             |
| ENSDARG00000024598  | 59.79328702 | 0.322623422  | 0.118837759 | 2.714822503  | 0.00663113  | 0.084940039 | homezb            | ZDB-GENE-030131-9225 | homezb            |
| ENSDARG00000021374  | 205.7055467 | 0.233567502  | 0.086063263 | 2.713904779  | 0.006649528 | 0.085114903 | cab39l1           | ZDB-GENE-040426-2897 | cab39l1           |
| ENSDARG00000056535  | 17.78377796 | -0.765880702 | 0.282238491 | -2.713594092 | 0.006655766 | 0.085120231 | pla2g4f.1         | ZDB-GENE-131121-408  | pla2g4f.1         |
| ENSDARG00000097208  | 14.8637531  | -0.734100714 | 0.270545303 | -2.713411418 | 0.006659437 | 0.085120231 | alkbh3            | ZDB-GENE-040801-254  | alkbh3            |
| ENSDARG00000073710  | 303.4800289 | 0.197196783  | 0.07268202  | 2.713143965  | 0.006664814 | 0.085128289 | usp7              | ZDB-GENE-030131-3656 | usp7              |
| ENSDARG00000003795  | 1325.434694 | -0.299475284 | 0.110403242 | -2.712558793 | 0.006676594 | 0.085218045 | idh2              | ZDB-GENE-031118-95   | idh2              |
| ENSDARG00000086173  | 114.4139546 | 0.324593826  | 0.119799406 | 2.70947775   | 0.006738922 | 0.08589884  | relb              | ZDB-GENE-030131-9531 | relb              |
| ENSDARG00000103025  | 1293.468916 | 0.965857012  | 0.356477316 | 2.709448735  | 0.006739512 | 0.08589884  | hmgcs1            | ZDB-GENE-040426-1042 | hmgcs1            |
| ENSDARG00000077130  | 34.59171923 | 0.458204388  | 0.169153328 | 2.708810956  | 0.00675248  | 0.086003003 | bcl10             | ZDB-GENE-100219-2    | bcl10             |
| ENSDARG00000075831  | 768.4556614 | 0.408359919  | 0.15079045  | 2.708128524  | 0.006766381 | 0.08611889  | slc7a8a           | ZDB-GENE-121120-2    | slc7a8a           |
| ENSDARG00000017569  | 239.5221193 | 0.354371576  | 0.130987376 | 2.70538725   | 0.00682248  | 0.086771306 | reep3a            | ZDB-GENE-051127-47   | reep3a            |
| ENSDARG00000091513  | 45.70998562 | 0.357698142  | 0.132231034 | 2.705099799  | 0.006828387 | 0.086784881 | C3orf70           |                      |                   |
| ENSDARG00000025397  | 24.60245095 | -0.490092216 | 0.181432103 | -2.701243092 | 0.006908083 | 0.087735586 | srsf3a            | ZDB-GENE-030616-631  | srsf3a            |
| ENSDARG00000018997  | 53.60887909 | -0.49615156  | 0.183735129 | -2.700363088 | 0.006926384 | 0.087905762 | cplx2l            | ZDB-GENE-040718-160  | cplx2l            |

|                    |             |              |             |              |             |             |                   |                      |                   |
|--------------------|-------------|--------------|-------------|--------------|-------------|-------------|-------------------|----------------------|-------------------|
| ENSDARG00000092894 | 14.76707702 | 0.899382734  | 0.333294885 | 2.698459459  | 0.006966122 | 0.088347574 | si:ch211-114113.9 | ZDB-GENE-070424-116  | si:ch211-114113.9 |
| ENSDARG00000101034 | 30.38802847 | -0.586605271 | 0.217711451 | -2.694416247 | 0.007051205 | 0.089363428 | si:dkey-206d17.12 | ZDB-GENE-081031-82   | si:dkey-206d17.12 |
| ENSDARG00000079584 | 15.92350082 | 0.621016864  | 0.23056944  | 2.693404918  | 0.007072632 | 0.089571682 | zgc:194930        | ZDB-GENE-081022-166  | zgc:194930        |
| ENSDARG00000009881 | 113.889398  | -0.298239208 | 0.110741313 | -2.693116046 | 0.007078763 | 0.089586062 | ier5              | ZDB-GENE-030616-127  | ier5              |
| ENSDARG00000052783 | 113.2932589 | 0.404950809  | 0.150401965 | 2.692456902  | 0.00709277  | 0.089700034 | cdc42ep3          | ZDB-GENE-040912-89   | cdc42ep3          |
| ENSDARG00000098162 | 302.8257617 | 0.486645753  | 0.180908322 | 2.690013081  | 0.007144922 | 0.090295901 | zgc:77748         | ZDB-GENE-040426-1864 | zgc:77748         |
| ENSDARG00000015676 | 128.4480073 | -0.349967693 | 0.130156883 | -2.688814336 | 0.007170629 | 0.09055037  | nmd3              | ZDB-GENE-050320-149  | nmd3              |
| ENSDARG00000077383 | 480.4186005 | 0.180020687  | 0.066956946 | 2.688603625  | 0.007175156 | 0.09055037  | anxa11a           | ZDB-GENE-030707-4    | anxa11a           |
| ENSDARG00000078214 | 241.9428169 | -0.369080948 | 0.137336088 | -2.687428726 | 0.007200447 | 0.090724148 | mybbp1a           | ZDB-GENE-030131-9864 | mybbp1a           |
| ENSDARG00000018162 | 13.23233847 | 0.628028153  | 0.233695927 | 2.687373121  | 0.007201646 | 0.090724148 | ctnnal1           | ZDB-GENE-060503-507  | ctnnal1           |
| ENSDARG00000057714 | 136.8878088 | 0.356958159  | 0.132833545 | 2.687259157  | 0.007204103 | 0.090724148 | cmah              | ZDB-GENE-040704-33   | cmah              |
| ENSDARG00000020072 | 285.8718915 | -0.376558125 | 0.140189488 | -2.686065331 | 0.007229895 | 0.090896381 | thbs4b            | ZDB-GENE-020708-4    | thbs4b            |
| ENSDARG00000070735 | 16.27919217 | 0.960655874  | 0.357648173 | 2.686036013  | 0.007230529 | 0.090896381 | rnd2              | ZDB-GENE-030616-177  | rnd2              |
| ENSDARG00000040118 | 15.78204787 | -0.843746702 | 0.314165404 | -2.685676685 | 0.007238309 | 0.090896381 | zgc:113232        | ZDB-GENE-050327-86   | zgc:113232        |
| ENSDARG00000024101 | 13.0996225  | -0.597651729 | 0.222552313 | -2.685443804 | 0.007243355 | 0.090896381 | adra1d            | ZDB-GENE-090312-203  | adra1d            |
| ENSDARG00000054916 | 255.852981  | -0.634251222 | 0.236191685 | -2.685324086 | 0.007245951 | 0.090896381 | eif4ebp3          | ZDB-GENE-041114-44   | eif4ebp3          |
| ENSDARG00000022295 | 99.29889715 | 0.506630135  | 0.188673552 | 2.685220738  | 0.007248192 | 0.090896381 | hnf1bb            | ZDB-GENE-030131-3003 | hnf1bb            |
| ENSDARG00000078772 | 141.7883888 | 0.27539123   | 0.102573674 | 2.68481395   | 0.007257019 | 0.090943482 | nbr1b             | ZDB-GENE-170215-1    | nbr1b             |
| ENSDARG00000079946 | 210.1461034 | 1.063694993  | 0.396276225 | 2.684226119  | 0.007269792 | 0.09103993  | sqlea             | ZDB-GENE-071004-98   | sqlea             |
| ENSDARG00000026759 | 97.51467369 | 0.584001004  | 0.217624603 | 2.683524737  | 0.007285059 | 0.091167449 | ldlr              | ZDB-GENE-040426-1254 | ldlr              |
| ENSDARG00000016526 | 46.41774469 | 0.619399062  | 0.230888331 | 2.682678068  | 0.007303526 | 0.091334818 | gata3             | ZDB-GENE-990415-82   | gata3             |
| ENSDARG00000055245 | 12.13088429 | 1.447586734  | 0.539728941 | 2.682062464  | 0.00731698  | 0.0914393   | zmp:0000000650    | ZDB-GENE-130530-653  | zmp:0000000650    |
| ENSDARG00000079766 | 58.23057605 | 0.452789395  | 0.168904133 | 2.680747878  | 0.007345784 | 0.091697636 | tap1              | ZDB-GENE-050517-43   | tap1              |
| ENSDARG00000035648 | 7.156017638 | 1.023760179  | 0.381907089 | 2.680652461  | 0.007347878 | 0.091697636 | irx4a             | ZDB-GENE-040426-1825 | irx4a             |
| ENSDARG00000038028 | 184.749838  | -0.430675594 | 0.160679985 | -2.680331298 | 0.007354933 | 0.091721842 | ndufa6            | ZDB-GENE-040426-1124 | ndufa6            |
| ENSDARG00000086815 | 258.7692476 | 0.223733109  | 0.083488594 | 2.679804499  | 0.007366517 | 0.091802466 | MYADM             | ZDB-GENE-070912-664  | si:dkeyp-67a8.2   |
| ENSDARG00000096355 | 6.641228758 | 1.708000316  | 0.637735251 | 2.678227858  | 0.007401285 | 0.092171697 | ighv1-4           | ZDB-GENE-040514-1    | ighv1-4           |
| ENSDARG00000075565 | 38.67769697 | -0.449010249 | 0.167705336 | -2.67737604  | 0.00742013  | 0.092342261 | lzts1             | ZDB-GENE-081104-431  | lzts1             |
| ENSDARG00000075034 | 24.87878949 | -0.478407629 | 0.178895602 | -2.674228011 | 0.007490151 | 0.09314901  | raver2            | ZDB-GENE-090713-1    | raver2            |
| ENSDARG00000004830 | 155.1315207 | 0.242339244  | 0.090640005 | 2.67364554   | 0.007503171 | 0.09324627  | flot2a            | ZDB-GENE-020430-3    | flot2a            |
| ENSDARG00000075768 | 363.27511   | -0.254436304 | 0.095188769 | -2.6729656   | 0.007518396 | 0.093370772 | sdhb              | ZDB-GENE-030131-8005 | sdhb              |
| ENSDARG00000099889 | 185.4128989 | -0.798238042 | 0.298738344 | -2.672030753 | 0.007539374 | 0.093566499 | dusp27            | ZDB-GENE-140513-1    | dusp27            |
| ENSDARG00000079393 | 60.73461521 | 1.334390135  | 0.499551168 | 2.671178092  | 0.007558553 | 0.093682118 | tmprss15          | ZDB-GENE-091204-83   | tmprss15          |
| ENSDARG00000061603 | 69.42681981 | -0.391233406 | 0.146466165 | -2.671152119 | 0.007559138 | 0.093682118 | sorbs2b           | ZDB-GENE-070308-3    | sorbs2b           |
| ENSDARG00000025033 | 133.8048036 | 0.274717631  | 0.102863402 | 2.670703339  | 0.007569251 | 0.093742665 | stx5a             | ZDB-GENE-040718-18   | stx5a             |
| ENSDARG00000053136 | 1051.998166 | 0.651004711  | 0.243873061 | 2.669440852  | 0.007597765 | 0.094030867 | b2m               | ZDB-GENE-980526-88   | b2m               |
| ENSDARG00000105071 | 60.90241844 | 0.378626509  | 0.141871292 | 2.668802846  | 0.007612212 | 0.094144686 | nos1apa           | ZDB-GENE-081024-1    | nos1apa           |
| ENSDARG00000035889 | 21.95510633 | 0.51213091   | 0.191942968 | 2.66814104   | 0.007627223 | 0.09426533  | zbtb8b            | ZDB-GENE-050417-42   | zbtb8b            |
| ENSDARG00000000656 | 54.26611463 | 0.556543912  | 0.208629558 | 2.667617751  | 0.007639112 | 0.094347236 | psmb9a            | ZDB-GENE-990415-140  | psmb9a            |
| ENSDARG00000069388 | 29.35468611 | 0.615967094  | 0.23103151  | 2.666160529  | 0.007672305 | 0.094691977 | tmem88b           | ZDB-GENE-060929-644  | tmem88b           |
| ENSDARG00000003462 | 33.87610812 | -0.599536229 | 0.225020883 | -2.664358176 | 0.007713538 | 0.095135409 | fech              | ZDB-GENE-000928-1    | fech              |
| ENSDARG00000016059 | 81.42056658 | 0.293868209  | 0.110325139 | 2.663655903  | 0.007729658 | 0.095268705 | rab5b             | ZDB-GENE-040426-2593 | rab5b             |
| ENSDARG00000027734 | 240.2951308 | 0.204584275  | 0.076856906 | 2.661885396  | 0.007770433 | 0.095657181 | srsf5b            | ZDB-GENE-040718-354  | srsf5b            |
| ENSDARG00000004105 | 91.02328325 | 0.311113002  | 0.116879621 | 2.661824193  | 0.007771846 | 0.095657181 | tie1              | ZDB-GENE-990415-55   | tie1              |
| ENSDARG00000101350 | 9.972138892 | -0.669718064 | 0.251709991 | -2.660673343 | 0.007798457 | 0.095918886 | arhgap28          | ZDB-GENE-041114-147  | arhgap28          |
| ENSDARG00000099003 | 77.75283188 | 0.441192499  | 0.165843515 | 2.660293943  | 0.007807248 | 0.095961195 | cyp2aa1           | ZDB-GENE-070424-33   | cyp2aa1           |
| ENSDARG00000100052 | 5.236576408 | 1.098854618  | 0.413146909 | 2.65971884   | 0.007820591 | 0.095974873 | cckb              | ZDB-GENE-060720-30   | cckb              |
| ENSDARG00000024693 | 74.00731562 | 0.415576895  | 0.156253097 | 2.659639409  | 0.007822435 | 0.095974873 | lysmd3            | ZDB-GENE-040625-88   | lysmd3            |
| ENSDARG00000029751 | 100.1243857 | -0.380130668 | 0.142930227 | -2.659554083 | 0.007824417 | 0.095974873 | wbp1lb            | ZDB-GENE-050522-112  | wbp1lb            |

|                    |             |              |             |              |             |             |                   |                      |                   |
|--------------------|-------------|--------------|-------------|--------------|-------------|-------------|-------------------|----------------------|-------------------|
| ENSDARG0000028071  | 523.1161197 | -0.308211491 | 0.115956853 | -2.657984276 | 0.007860956 | 0.09635716  | bmp1a             | ZDB-GENE-060818-1    | bmp1a             |
| ENSDARG0000002791  | 1551.822241 | -0.290435787 | 0.10935965  | -2.655785627 | 0.00791239  | 0.096921367 | atp1a1a.1         | ZDB-GENE-001212-1    | atp1a1a.1         |
| ENSDARG00000016253 | 65.1015091  | 0.333264308  | 0.125525157 | 2.65496029   | 0.007931775 | 0.0970925   | ralab             | ZDB-GENE-041114-195  | ralab             |
| ENSDARG00000104138 | 58.2354128  | -0.491904044 | 0.185309121 | -2.654505301 | 0.007942479 | 0.097157216 | igfbp7            | ZDB-GENE-040426-2423 | igfbp7            |
| ENSDARG00000075016 | 3562.373584 | 0.7743808    | 0.291840537 | 2.653438096  | 0.007967638 | 0.097398541 | apobb.2           | ZDB-GENE-070705-554  | apobb.2           |
| ENSDARG0000008886  | 10.26923995 | 0.746137093  | 0.281224781 | 2.65316979   | 0.007973975 | 0.097409599 | msx1b             | ZDB-GENE-980526-26   | msx1b             |
| ENSDARG00000076416 | 137.7501178 | 0.217941325  | 0.082179816 | 2.652005518  | 0.008001523 | 0.097658322 | shroom2a          | ZDB-GENE-050208-128  | shroom2a          |
| ENSDARG00000069619 | 199.102887  | 0.291852754  | 0.110056313 | 2.651849277  | 0.008005227 | 0.097658322 | atf7ip            | ZDB-GENE-061103-178  | atf7ip            |
| ENSDARG00000103337 | 118.7495211 | -0.441392205 | 0.166467116 | -2.651527923 | 0.008012849 | 0.097668146 | rrp1              | ZDB-GENE-030131-9837 | rrp1              |
| ENSDARG00000057128 | 299.9498687 | -0.293730439 | 0.110784979 | -2.651356182 | 0.008016925 | 0.097668146 | hadhaa            | ZDB-GENE-031222-5    | hadhaa            |
| ENSDARG00000103046 | 191.3899395 | 0.270803813  | 0.102161733 | 2.650736283  | 0.008031653 | 0.097781145 | rest              | ZDB-GENE-080415-1    | rest              |
| ENSDARG00000105415 | 4.043080383 | -3.955587411 | 1.492433048 | -2.650428718 | 0.008038969 | 0.097803819 | si:ch211-163c2.1  | ZDB-GENE-160114-75   | si:ch211-163c2.1  |
| ENSDARG00000116625 | 16.60419997 | 0.57359973   | 0.216600773 | 2.64818875   | 0.008092433 | 0.098262334 | znf1141           | ZDB-GENE-110913-35   | znf1141           |
| ENSDARG00000035595 | 37.85000042 | 0.450420466  | 0.170086929 | 2.648178012  | 0.00809269  | 0.098262334 | ficd              | ZDB-GENE-030131-6588 | ficd              |
| ENSDARG00000095805 | 15.12564375 | 0.66989492   | 0.252966075 | 2.648161105  | 0.008093095 | 0.098262334 | si:dkey-16n15.6   | ZDB-GENE-110411-70   | si:dkey-16n15.6   |
| ENSDARG00000043658 | 141.7722821 | 0.257455043  | 0.097243476 | 2.647530247  | 0.008108211 | 0.098379256 | cxadr             | ZDB-GENE-020814-2    | cxadr             |
| ENSDARG00000057586 | 13.24306495 | -0.766502218 | 0.289543736 | -2.647276124 | 0.008114307 | 0.098385754 | sall3b            | ZDB-GENE-030131-9140 | sall3b            |
| ENSDARG00000013095 | 167.1876694 | 0.27910058   | 0.105445879 | 2.646860956  | 0.008124275 | 0.098385754 | gclc              | ZDB-GENE-030131-5056 | gclc              |
| ENSDARG00000002165 | 228.4791473 | 0.358340089  | 0.135385022 | 2.646822245  | 0.008125205 | 0.098385754 | psme1             | ZDB-GENE-991110-17   | psme1             |
| ENSDARG00000092091 | 92.66926015 | -1.066506172 | 0.403024405 | -2.64625705  | 0.008138794 | 0.098483806 | cyp2x12           | ZDB-GENE-030131-4664 | cyp2x12           |
| ENSDARG00000100003 | 177.9191593 | -0.471092887 | 0.178065698 | -2.645612782 | 0.00815431  | 0.098601089 | glulb             | ZDB-GENE-030131-8417 | glulb             |
| ENSDARG00000052705 | 30.60759956 | -1.327662958 | 0.501876412 | -2.6453982   | 0.008159483 | 0.098601089 | pkp1b             | ZDB-GENE-030131-417  | pkp1b             |
| ENSDARG00000076225 | 22.02700174 | 0.551240141  | 0.208435208 | 2.644659439  | 0.008177317 | 0.098750054 | tha1              | ZDB-GENE-040704-14   | tha1              |
| ENSDARG00000100633 | 204.4929678 | 0.299599441  | 0.113296353 | 2.644387337  | 0.008183895 | 0.098762975 | zgc:114200        | ZDB-GENE-050913-96   | zgc:114200        |
| ENSDARG00000086826 | 621.4925115 | 0.536669375  | 0.202988118 | 2.643846247  | 0.008196988 | 0.098773297 | sult6b1           | ZDB-GENE-050417-228  | sult6b1           |
| ENSDARG00000076532 | 683.1281521 | 0.27926383   | 0.105629631 | 2.643802011  | 0.008198059 | 0.098773297 | si:ch211-222l21.1 | ZDB-GENE-030131-247  | si:ch211-222l21.1 |
| ENSDARG00000040445 | 263.3965191 | 0.604729113  | 0.228746126 | 2.643669316  | 0.008201274 | 0.098773297 | si:ch211-219a4.3  | ZDB-GENE-070424-157  | si:ch211-219a4.3  |
| ENSDARG00000030887 | 66.35768648 | 0.395116787  | 0.149479486 | 2.643284346  | 0.008210605 | 0.098819316 | phf23a            | ZDB-GENE-050320-67   | phf23a            |
| ENSDARG00000043497 | 43.03228532 | -0.479875025 | 0.18158811  | -2.642656649 | 0.00822584  | 0.098936282 | scrn2             | ZDB-GENE-040724-75   | scrn2             |
| ENSDARG00000038059 | 240.4564869 | 0.206855877  | 0.078291763 | 2.642115458  | 0.008238996 | 0.099028099 | grb2b             | ZDB-GENE-040426-1975 | grb2b             |
| ENSDARG00000029170 | 499.3484158 | -0.190687132 | 0.0721966   | -2.641220401 | 0.008260796 | 0.099223614 | si:ch211-200p22.4 | ZDB-GENE-081104-61   | si:ch211-200p22.4 |
| ENSDARG00000086523 | 119.6864374 | 0.365335032  | 0.138338367 | 2.640880039  | 0.008269099 | 0.099256866 | ch25h3            | ZDB-GENE-180119-1    | ch25h3            |
| ENSDARG00000003520 | 66.02913603 | 0.34419439   | 0.130431852 | 2.638882934  | 0.00831797  | 0.099681446 | tbc1d14           | ZDB-GENE-030131-6136 | tbc1d14           |
| ENSDARG00000093822 | 6.23290642  | -1.70137787  | 0.644756663 | -2.638790677 | 0.008320234 | 0.099681446 | si:dkey-259j3.5   | ZDB-GENE-091204-113  | si:dkey-259j3.5   |
| ENSDARG00000002215 | 56.64261934 | 0.38342654   | 0.145317049 | 2.63855165   | 0.008326102 | 0.099681446 | rtca              | ZDB-GENE-030131-9687 | rtca              |
| ENSDARG00000070824 | 242.4563942 | -0.294149066 | 0.111489749 | -2.638350784 | 0.008331036 | 0.099681446 | ndufb5            | ZDB-GENE-011010-1    | ndufb5            |
| ENSDARG00000051890 | 23.45453318 | 1.974199626  | 0.748405929 | 2.637872779  | 0.008342787 | 0.099681446 | hp                | ZDB-GENE-030131-1259 | hp                |
| ENSDARG00000078643 | 4.684788457 | 1.158148689  | 0.439048726 | 2.637859128  | 0.008343123 | 0.099681446 | vtcn1             | ZDB-GENE-070912-388  | vtcn1             |
| ENSDARG00000001910 | 266.1563054 | 0.281531744  | 0.106745505 | 2.637410764  | 0.00835416  | 0.099681446 | rora              | ZDB-GENE-040426-855  | rora              |
| ENSDARG00000061048 | 127.0601462 | -0.22998555  | 0.087207808 | -2.637212814 | 0.008359037 | 0.099681446 | ranbp9            | ZDB-GENE-021030-5    | ranbp9            |
| ENSDARG00000036481 | 713.424374  | 0.347350108  | 0.131711488 | 2.637204349  | 0.008359246 | 0.099681446 | tcn2              | ZDB-GENE-030131-4648 | tcn2              |
| ENSDARG00000045453 | 3.792623557 | 1.727331593  | 0.654994044 | 2.637171451  | 0.008360057 | 0.099681446 | f13a1a.1          | ZDB-GENE-060929-1250 | f13a1a.1          |
| ENSDARG00000018283 | 36.25904936 | 0.560447852  | 0.212538101 | 2.636928853  | 0.008366038 | 0.09968648  | cyba              | ZDB-GENE-040426-1526 | cyba              |
| ENSDARG00000033437 | 165.3121634 | 0.338743983  | 0.128481435 | 2.636520856  | 0.008376105 | 0.099740168 | rps6ka1           | ZDB-GENE-060929-516  | rps6ka1           |
| ENSDARG00000070961 | 107.3871962 | -0.372887478 | 0.141450213 | -2.636174736 | 0.008384654 | 0.099775716 | lepr              | ZDB-GENE-080104-1    | lepr              |
| ENSDARG00000045411 | 301.4648562 | 0.337397699  | 0.12801119  | 2.635689096  | 0.008396663 | 0.099831394 | acad11            | ZDB-GENE-040426-814  | acad11            |
| ENSDARG00000103067 | 6.857203133 | -0.879322475 | 0.333640931 | -2.635535374 | 0.008400467 | 0.099831394 | adgrd2            | ZDB-GENE-081104-190  | adgrd2            |
| ENSDARG00000097011 | 6797.228502 | -0.621376923 | 0.235815833 | -2.635009345 | 0.008413497 | 0.099920024 | hbaa1             | ZDB-GENE-980526-79   | hbaa1             |
| ENSDARG00000109390 | 76.56490175 | 1.566104213  | 0.594425297 | 2.6346527    | 0.008422341 | 0.099920953 | si:ch211-66i15.5  | ZDB-GENE-090313-122  | si:ch211-66i15.5  |

|                    |             |              |             |              |             |             |        |                     |        |
|--------------------|-------------|--------------|-------------|--------------|-------------|-------------|--------|---------------------|--------|
| ENSDARG00000110439 | 76.27848526 | 0.44508919   | 0.168942714 | 2.634556878  | 0.008424719 | 0.099920953 | ap1s3a | ZDB-GENE-050417-222 | ap1s3a |
| ENSDARG00000039887 | 230.7023477 | -0.265526695 | 0.100798726 | -2.634226692 | 0.008432916 | 0.099952076 | c1qbp  | ZDB-GENE-050417-408 | c1qbp  |
