# Supplementary material
Source: publisher figshare collection journal article supplement (https://gsajournals.figshare.com/articles/dataset/_/13236983)
Supplement: Supplementary file 6 [file 1]

| Supplemental Table S6: 35dpf trunk RNA-seq data, genes differentially expressed between <i>nr5a1a</i> mutants and wildtypes. |             |                |             |              |             |             |                   |                      |                   |
|------------------------------------------------------------------------------------------------------------------------------|-------------|----------------|-------------|--------------|-------------|-------------|-------------------|----------------------|-------------------|
| EnsemblID                                                                                                                    | baseMean    | log2FoldChange | lfcSE       | stat         | pvalue      | padj        | EnsemblGeneName   | ZFIN_ID              | ZFIN_Name         |
| ENSDARG00000092052                                                                                                           | 26.05752373 | -6.495926035   | 0.554347407 | -11.71814994 | 1.02895E-31 | 2.18003E-27 | gstk4             | ZDB-GENE-060421-6530 | gstk4             |
| ENSDARG00000001975                                                                                                           | 289.4978447 | -1.662620362   | 0.160618438 | -10.35136676 | 4.12554E-25 | 3.76341E-21 | hsd11b2           | ZDB-GENE-030131-6030 | hsd11b2           |
| ENSDARG00000018621                                                                                                           | 310.8632036 | -3.379870219   | 0.327289957 | -10.32683755 | 5.32885E-25 | 3.76341E-21 | slc6a19a.1        | ZDB-GENE-070620-2    | slc6a19a.1        |
| ENSDARG00000011665                                                                                                           | 2404.031379 | -1.822857494   | 0.177715779 | -10.25715054 | 1.09902E-24 | 5.82123E-21 | aldoaa            | ZDB-GENE-030131-8369 | aldoaa            |
| ENSDARG00000099517                                                                                                           | 448.5743415 | -1.763771238   | 0.178367117 | -9.888432731 | 4.67286E-23 | 1.98008E-19 | adssl1            | ZDB-GENE-040516-18   | adssl1            |
| ENSDARG00000077236                                                                                                           | 83.05563514 | -2.754783338   | 0.280100359 | -9.834986823 | 7.9578E-23  | 2.81003E-19 | hsppb6            | ZDB-GENE-080214-7    | hsppb6            |
| ENSDARG00000028367                                                                                                           | 24.46912077 | -3.454244621   | 0.364198077 | -9.484521844 | 2.43497E-21 | 7.36995E-18 | sult2st3          | ZDB-GENE-061117-4    | sult2st3          |
| ENSDARG00000096712                                                                                                           | 145.2698687 | -2.167761735   | 0.237293952 | -9.135343371 | 6.51995E-20 | 1.72673E-16 | si:dkey-193p11.2  | ZDB-GENE-030131-8407 | si:dkey-193p11.2  |
| ENSDARG00000100826                                                                                                           | 254.3471364 | -1.578245244   | 0.175810221 | -8.976982303 | 2.78295E-19 | 6.55136E-16 | hif1al            | ZDB-GENE-040426-1315 | hif1al            |
| ENSDARG00000020239                                                                                                           | 299.4418007 | -2.355286367   | 0.26836997  | -8.776266476 | 1.68991E-18 | 3.58042E-15 | lpin1             | ZDB-GENE-080722-2    | lpin1             |
| ENSDARG00000007682                                                                                                           | 758.4870963 | -1.975968701   | 0.229300688 | -8.617369261 | 6.85099E-18 | 1.31956E-14 | ppdpfa            | ZDB-GENE-030219-204  | ppdpfa            |
| ENSDARG00000068194                                                                                                           | 97.25695768 | -3.090099573   | 0.367294282 | -8.413143702 | 3.99165E-17 | 7.0476E-14  | klf9              | ZDB-GENE-060526-244  | klf9              |
| ENSDARG00000033566                                                                                                           | 5.085319212 | -6.411769321   | 0.770915093 | -8.317088849 | 9.01502E-17 | 1.46924E-13 | cyp17a1           | ZDB-GENE-040213-2    | cyp17a1           |
| ENSDARG00000092126                                                                                                           | 11.67012718 | -6.174268614   | 0.746713776 | -8.268588065 | 1.35555E-16 | 2.05143E-13 | vtg5              | ZDB-GENE-001201-4    | vtg5              |
| ENSDARG00000074526                                                                                                           | 38.01897527 | -3.468355095   | 0.421534957 | -8.227918072 | 1.90495E-16 | 2.62616E-13 | zbtb16b           | ZDB-GENE-100923-1    | zbtb16b           |
| ENSDARG00000069377                                                                                                           | 27.32945936 | -3.685041006   | 0.448133249 | -8.223092163 | 1.98322E-16 | 2.62616E-13 | si:dkey-242g16.2  | ZDB-GENE-030131-8324 | si:dkey-242g16.2  |
| ENSDARG00000060797                                                                                                           | 110.737801  | -1.471844609   | 0.186295334 | -7.900598358 | 2.77568E-15 | 3.45931E-12 | pfkmb             | ZDB-GENE-081114-1    | pfkmb             |
| ENSDARG00000093494                                                                                                           | 34.30948456 | -2.053198468   | 0.261071388 | -7.864509718 | 3.70546E-15 | 4.36153E-12 | si:ch211-217k17.9 | ZDB-GENE-061207-21   | si:ch211-217k17.9 |
| ENSDARG00000070426                                                                                                           | 961.9570551 | -1.609362437   | 0.205085376 | -7.847280331 | 4.25156E-15 | 4.74094E-12 | chac1             | ZDB-GENE-030131-1957 | chac1             |
| ENSDARG00000055518                                                                                                           | 760.7427117 | -1.6241471     | 0.207829396 | -7.814809336 | 5.50463E-15 | 5.83133E-12 | pygma             | ZDB-GENE-050522-482  | pygma             |
| ENSDARG00000046053                                                                                                           | 62.50326774 | -2.766591515   | 0.354728788 | -7.799173926 | 6.23137E-15 | 6.28686E-12 | slc27a6           | ZDB-GENE-060825-27   | slc27a6           |
| ENSDARG00000068372                                                                                                           | 9.569120113 | -7.902784367   | 1.016538975 | -7.774206956 | 7.59215E-15 | 7.31159E-12 | zgc:158427        | ZDB-GENE-061215-110  | zgc:158427        |
| ENSDARG00000101749                                                                                                           | 211.071462  | 1.382578553    | 0.177989161 | 7.767768246  | 7.9881E-15  | 7.35843E-12 | zgc:92161         | ZDB-GENE-040912-22   | zgc:92161         |
| ENSDARG00000041607                                                                                                           | 158.3568523 | -1.087818914   | 0.140933548 | -7.718665472 | 1.17554E-14 | 1.03776E-11 | eif4ebp3l         | ZDB-GENE-030826-26   | eif4ebp3l         |
| ENSDARG00000058556                                                                                                           | 271.5131585 | -2.915513156   | 0.379180992 | -7.68897497  | 1.48318E-14 | 1.25697E-11 | muc5.2            | ZDB-GENE-121108-1    | muc5.2            |
| ENSDARG00000013721                                                                                                           | 2181.888068 | -1.798155768   | 0.234919078 | -7.654362459 | 1.94274E-14 | 1.58311E-11 | g6pca.2           | ZDB-GENE-050309-17   | g6pca.2           |
| ENSDARG00000027744                                                                                                           | 167.5747259 | -2.287129893   | 0.302993023 | -7.548457288 | 4.40444E-14 | 3.45618E-11 | gadd45ba          | ZDB-GENE-040426-1971 | gadd45ba          |
| ENSDARG00000075301                                                                                                           | 15.78589951 | -2.870184678   | 0.381652936 | -7.52040507  | 5.46068E-14 | 4.13198E-11 | gsdf              | ZDB-GENE-101029-3    | gsdf              |
| ENSDARG00000091260                                                                                                           | 132.01416   | -1.423805806   | 0.191098466 | -7.450639623 | 9.28888E-14 | 6.66045E-11 | mylk4a            | ZDB-GENE-120824-2    | mylk4a            |
| ENSDARG00000006137                                                                                                           | 12.64481614 | -4.851086499   | 0.651271711 | -7.448636902 | 9.43095E-14 | 6.66045E-11 | star              | ZDB-GENE-001120-3    | star              |
| ENSDARG00000045051                                                                                                           | 26.51522229 | -2.669642372   | 0.359866764 | -7.418418805 | 1.18527E-13 | 8.10073E-11 | slc16a3           | ZDB-GENE-030131-5487 | slc16a3           |
| ENSDARG00000014053                                                                                                           | 67.45986768 | -2.49362585    | 0.337847019 | -7.380931927 | 1.57185E-13 | 1.04071E-10 | olfm1b            | ZDB-GENE-040801-228  | olfm1b            |
| ENSDARG00000038639                                                                                                           | 20.44349338 | -3.217229898   | 0.438688178 | -7.33375108  | 2.23799E-13 | 1.41919E-10 | elovl6l           | ZDB-GENE-031110-3    | elovl6l           |
| ENSDARG00000058371                                                                                                           | 7784.575101 | -1.113061776   | 0.151821001 | -7.331408501 | 2.27746E-13 | 1.41919E-10 | krt5              | ZDB-GENE-991110-23   | krt5              |
| ENSDARG00000088524                                                                                                           | 4.051002146 | -5.9668675     | 0.816916238 | -7.304136242 | 2.79054E-13 | 1.68923E-10 | acot17            | ZDB-GENE-040426-2381 | acot17            |
| ENSDARG00000100352                                                                                                           | 115.3934128 | -1.991579175   | 0.275404317 | -7.231474071 | 4.77779E-13 | 2.81186E-10 | aglb              | ZDB-GENE-050309-54   | aglb              |
| ENSDARG00000007184                                                                                                           | 36.17916022 | -2.527704873   | 0.35047515  | -7.212222817 | 5.50458E-13 | 3.15204E-10 | zbtb16a           | ZDB-GENE-030131-1989 | zbtb16a           |
| ENSDARG00000069381                                                                                                           | 26.06185693 | 4.419730949    | 0.61365908  | 7.202257882  | 5.92235E-13 | 3.30202E-10 | si:ch211-125e6.5  | ZDB-GENE-070912-39   | si:ch211-125e6.5  |
| ENSDARG00000011122                                                                                                           | 141.8906159 | -1.685403901   | 0.23583319  | -7.145983395 | 8.93539E-13 | 4.85421E-10 | pptc7a            | ZDB-GENE-041114-74   | pptc7a            |
| ENSDARG00000075666                                                                                                           | 286.2778819 | -1.840526019   | 0.258190029 | -7.128571257 | 1.01416E-12 | 5.37176E-10 | tsc22d3           | ZDB-GENE-040426-1433 | tsc22d3           |
| ENSDARG00000061368                                                                                                           | 130.392681  | -1.296340964   | 0.182999097 | -7.083865342 | 1.40188E-12 | 7.03006E-10 | klf13             | ZDB-GENE-060929-1274 | klf13             |
| ENSDARG00000089885                                                                                                           | 53.83462165 | -2.026952164   | 0.286194225 | -7.082435594 | 1.41643E-12 | 7.03006E-10 | slc16a12b         | ZDB-GENE-050522-80   | slc16a12b         |
| ENSDARG00000042055                                                                                                           | 44.11375974 | -2.405611905   | 0.339707261 | -7.081426223 | 1.42678E-12 | 7.03006E-10 | fam129aa          | ZDB-GENE-041014-181  | fam129aa          |
| ENSDARG00000087303                                                                                                           | 376.4473634 | -1.406722639   | 0.201112306 | -6.994364122 | 2.66465E-12 | 1.28309E-09 | cebpd             | ZDB-GENE-020111-4    | cebpd             |
| ENSDARG00000075191                                                                                                           | 16.82518752 | 2.495788655    | 0.35898441  | 6.952359447  | 3.59227E-12 | 1.69132E-09 | oacyl             | ZDB-GENE-090710-2    | oacyl             |
| ENSDARG00000035719                                                                                                           | 47.81105902 | -2.488892033   | 0.359443807 | -6.924286867 | 4.38177E-12 | 2.01819E-09 | arl5c             | ZDB-GENE-040426-1866 | arl5c             |
| ENSDARG00000096739                                                                                                           | 414.1552786 | 1.174182696    | 0.170101453 | 6.902837551  | 5.09739E-12 | 2.29784E-09 | si:dkey-219e21.2  | ZDB-GENE-141215-26   | si:dkey-219e21.2  |

|                    |             |              |             |              |             |             |                  |                      |                  |  |
|--------------------|-------------|--------------|-------------|--------------|-------------|-------------|------------------|----------------------|------------------|--|
| ENSDARG00000079034 | 21.34392507 | -5.12974876  | 0.745541181 | -6.880570639 | 5.96133E-12 | 2.63131E-09 | si:dkey-19b23.11 | ZDB-GENE-030131-6199 | si:dkey-19b23.11 |  |
| ENSDARG00000102146 | 120.8441344 | -3.250535644 | 0.474587691 | -6.849178158 | 7.42754E-12 | 3.21158E-09 | si:ch211-69b7.6  | ZDB-GENE-141212-266  | si:ch211-69b7.6  |  |
| ENSDARG00000057571 | 846.9048483 | -1.156714005 | 0.169211932 | -6.835889137 | 8.1498E-12  | 3.40236E-09 | pgam2            | ZDB-GENE-040116-6    | pgam2            |  |
| ENSDARG00000086856 | 56.76127004 | -1.428072226 | 0.208929574 | -6.835184682 | 8.18995E-12 | 3.40236E-09 | stk35            | ZDB-GENE-061103-553  | stk35            |  |
| ENSDARG00000097556 | 12.12683591 | -2.14464751  | 0.319060044 | -6.721767739 | 1.79533E-11 | 7.31493E-09 | cyp8b2           | ZDB-GENE-080212-9    | cyp8b2           |  |
| ENSDARG00000035869 | 920.6705713 | -0.618283149 | 0.092180523 | -6.707307871 | 1.98248E-11 | 7.78531E-09 | azin1b           | ZDB-GENE-030121-1    | azin1b           |  |
| ENSDARG00000036830 | 5601.453125 | -1.077204118 | 0.160604715 | -6.707176193 | 1.98427E-11 | 7.78531E-09 | krt91            | ZDB-GENE-040801-181  | krt91            |  |
| ENSDARG00000003109 | 276.1385781 | 1.168969332  | 0.174431106 | 6.701610512  | 2.06135E-11 | 7.94069E-09 | rcan1a           | ZDB-GENE-040801-135  | rcan1a           |  |
| ENSDARG00000044010 | 76.68547307 | -1.353608251 | 0.202329924 | -6.690104082 | 2.23012E-11 | 8.43742E-09 | lox12a           | ZDB-GENE-070818-1    | lox12a           |  |
| ENSDARG00000014179 | 203.5803529 | -1.466298023 | 0.220388901 | -6.653229875 | 2.8673E-11  | 1.06578E-08 | pfkma            | ZDB-GENE-040912-135  | pfkma            |  |
| ENSDARG00000076520 | 26.53038433 | -2.012408339 | 0.302687078 | -6.648477878 | 2.96139E-11 | 1.08178E-08 | mafb             | ZDB-GENE-141211-38   | mafb             |  |
| ENSDARG00000030604 | 41.90260072 | -1.339336016 | 0.202154976 | -6.625293345 | 3.46559E-11 | 1.23987E-08 | phkg1a           | ZDB-GENE-061103-385  | phkg1a           |  |
| ENSDARG00000097959 | 167.2246746 | -1.949268822 | 0.294302057 | -6.623361184 | 3.51122E-11 | 1.23987E-08 | si:dkey-248g15.3 | ZDB-GENE-131127-95   | si:dkey-248g15.3 |  |
| ENSDARG00000099860 | 1211.850691 | -1.137099902 | 0.17274113  | -6.582681871 | 4.62037E-11 | 1.60478E-08 | pkmb             | ZDB-GENE-040801-230  | pkmb             |  |
| ENSDARG00000028725 | 34.31022666 | -1.410994084 | 0.215092633 | -6.559936815 | 5.38306E-11 | 1.83953E-08 | adra1aa          | ZDB-GENE-030131-2831 | adra1aa          |  |
| ENSDARG00000069630 | 882.3899949 | 1.159916184  | 0.177418763 | 6.537731215  | 6.2459E-11  | 2.10051E-08 | tat              | ZDB-GENE-030131-1144 | tat              |  |
| ENSDARG00000052279 | 103.4152063 | 1.400631137  | 0.214411124 | 6.532455549  | 6.47E-11    | 2.11325E-08 | osgn1            | ZDB-GENE-040426-864  | osgn1            |  |
| ENSDARG00000097559 | 8.300124602 | -2.80243835  | 0.42912074  | -6.53065231  | 6.54839E-11 | 2.11325E-08 | cyp8b3           | ZDB-GENE-040912-153  | cyp8b3           |  |
| ENSDARG00000105039 | 26.6577159  | -2.405313605 | 0.368492359 | -6.527445002 | 6.69011E-11 | 2.11325E-08 | phka1b           | ZDB-GENE-091204-81   | phka1b           |  |
| ENSDARG00000069615 | 423.9524308 | -1.565322057 | 0.239807337 | -6.527415197 | 6.69144E-11 | 2.11325E-08 | ckmt2a           | ZDB-GENE-030131-5717 | ckmt2a           |  |
| ENSDARG00000055412 | 43.67825506 | -1.586852736 | 0.243181305 | -6.525389512 | 6.7825E-11  | 2.11325E-08 | mylk4b           | ZDB-GENE-041001-128  | mylk4b           |  |
| ENSDARG00000057032 | 32.90305035 | 1.419739658  | 0.218034287 | 6.511543116  | 7.43827E-11 | 2.2641E-08  | ppm1nb           | ZDB-GENE-071004-34   | ppm1nb           |  |
| ENSDARG00000011245 | 72.2479883  | -1.224129575 | 0.188018265 | -6.510694991 | 7.48039E-11 | 2.2641E-08  | esrp1            | ZDB-GENE-070112-1732 | esrp1            |  |
| ENSDARG00000093044 | 89.53704323 | 2.864042846  | 0.440666693 | 6.499340412  | 8.06729E-11 | 2.40735E-08 | si:ch211-161h7.5 | ZDB-GENE-091204-265  | si:ch211-161h7.5 |  |
| ENSDARG00000012968 | 185.9436121 | -0.702857147 | 0.108566377 | -6.473985444 | 9.54511E-11 | 2.80878E-08 | rhoub            | ZDB-GENE-050417-308  | rhoub            |  |
| ENSDARG00000058285 | 59.41922036 | -1.461761936 | 0.226345766 | -6.458092679 | 1.06031E-10 | 3.07736E-08 | cpt1b            | ZDB-GENE-041010-9    | cpt1b            |  |
| ENSDARG00000031336 | 88.17168821 | -1.188654884 | 0.184817101 | -6.431519997 | 1.26334E-10 | 3.61708E-08 | hsd20b2          | ZDB-GENE-030804-21   | hsd20b2          |  |
| ENSDARG00000015611 | 34.07155095 | -1.436374745 | 0.223780277 | -6.418683378 | 1.37458E-10 | 3.8831E-08  | rasl11b          | ZDB-GENE-040426-793  | rasl11b          |  |
| ENSDARG00000069946 | 300.5415561 | -1.101994209 | 0.171829384 | -6.413304769 | 1.42398E-10 | 3.96973E-08 | itga6b           | ZDB-GENE-050320-5    | itga6b           |  |
| ENSDARG00000028396 | 530.1083819 | -4.326048281 | 0.677801288 | -6.382472797 | 1.74251E-10 | 4.79462E-08 | fkbp5            | ZDB-GENE-030616-630  | fkbp5            |  |
| ENSDARG00000031616 | 56.80693832 | -1.417715628 | 0.222313117 | -6.377111916 | 1.80459E-10 | 4.90176E-08 | g6pca.1          | ZDB-GENE-031001-4    | g6pca.1          |  |
| ENSDARG00000001910 | 266.1563054 | 0.716301304  | 0.112482982 | 6.368086024  | 1.91402E-10 | 5.1332E-08  | rorab            | ZDB-GENE-040426-855  | rorab            |  |
| ENSDARG00000021787 | 173.4913099 | -1.691174279 | 0.266464946 | -6.346704531 | 2.19976E-10 | 5.82579E-08 | abcb5            | ZDB-GENE-030131-6414 | abcb5            |  |
| ENSDARG00000012366 | 48.00462376 | -1.331975359 | 0.210073696 | -6.34051472  | 2.28999E-10 | 5.98987E-08 | fbp2             | ZDB-GENE-040822-23   | fbp2             |  |
| ENSDARG00000100691 | 203.3253983 | 1.36964504   | 0.216426968 | 6.328439815  | 2.47652E-10 | 6.39879E-08 | prss35           | ZDB-GENE-040704-55   | prss35           |  |
| ENSDARG00000099719 | 14.67071504 | -3.045889862 | 0.485072679 | -6.279244312 | 3.40223E-10 | 8.68469E-08 | cdkn1d           | ZDB-GENE-110215-1    | cdkn1d           |  |
| ENSDARG00000029497 | 46.63571565 | -1.986385556 | 0.317011425 | -6.265974659 | 3.70501E-10 | 9.24276E-08 | tfcp2l1          | ZDB-GENE-040704-58   | tfcp2l1          |  |
| ENSDARG00000020298 | 119.7201683 | -1.646312061 | 0.262743831 | -6.26584478  | 3.7081E-10  | 9.24276E-08 | btg2             | ZDB-GENE-000210-15   | btg2             |  |
| ENSDARG00000103826 | 327.7713301 | -1.226552191 | 0.196035298 | -6.256792545 | 3.92976E-10 | 9.68137E-08 | gpib             | ZDB-GENE-020513-3    | gpib             |  |
| ENSDARG00000078309 | 93.4031951  | -1.365039966 | 0.218305592 | -6.252885926 | 4.02936E-10 | 9.81266E-08 | fam83b           | ZDB-GENE-030131-7066 | fam83b           |  |
| ENSDARG00000053853 | 2455.738839 | -1.546784244 | 0.249068307 | -6.210281285 | 5.28898E-10 | 1.27338E-07 | slc13a2          | ZDB-GENE-040426-2389 | slc13a2          |  |
| ENSDARG00000097205 | 244.3177908 | -1.218452905 | 0.196779372 | -6.191974764 | 5.94151E-10 | 1.41441E-07 | ulk2             | ZDB-GENE-090218-30   | ulk2             |  |
| ENSDARG00000000796 | 190.208268  | -1.334461017 | 0.216199738 | -6.172352624 | 6.72812E-10 | 1.58388E-07 | nr4a1            | ZDB-GENE-040704-11   | nr4a1            |  |
| ENSDARG00000017180 | 298.0362864 | -0.67264977  | 0.109037583 | -6.168971741 | 6.87355E-10 | 1.60033E-07 | npc1             | ZDB-GENE-030131-3161 | npc1             |  |
| ENSDARG00000091209 | 71.94187003 | -2.18489526  | 0.354798218 | -6.158134827 | 7.36067E-10 | 1.69511E-07 | ucp3             | ZDB-GENE-040426-1317 | ucp3             |  |
| ENSDARG00000041433 | 553.2621876 | -1.81281811  | 0.296437152 | -6.115353951 | 9.63429E-10 | 2.19486E-07 | si:dkey-7c18.24  | ZDB-GENE-041014-63   | si:dkey-7c18.24  |  |
| ENSDARG00000088813 | 81.85010095 | -1.42874173  | 0.233928909 | -6.107589422 | 1.01147E-09 | 2.27979E-07 | ppp1r3ab         | ZDB-GENE-050309-246  | ppp1r3ab         |  |
| ENSDARG00000071288 | 18.0809953  | -1.663353287 | 0.272743031 | -6.098609665 | 1.06995E-09 | 2.37052E-07 | samhd1           | ZDB-GENE-090313-386  | samhd1           |  |
| ENSDARG00000104039 | 173.1613809 | -1.25196511  | 0.205307811 | -6.097990655 | 1.0741E-09  | 2.37052E-07 | erffi1a          | ZDB-GENE-030131-6256 | erffi1a          |  |

|                    |             |              |             |              |             |             |                   |                      |                   |  |
|--------------------|-------------|--------------|-------------|--------------|-------------|-------------|-------------------|----------------------|-------------------|--|
| ENSDARG00000104576 | 178.9488895 | -2.24443001  | 0.369491877 | -6.074369012 | 1.24476E-09 | 2.71884E-07 | si:ch211-152c8.5  | ZDB-GENE-030131-5764 | si:ch211-152c8.5  |  |
| ENSDARG00000029075 | 97.61254822 | -1.07496489  | 0.17739228  | -6.059817774 | 1.36276E-09 | 2.93758E-07 | pfkfb4b           | ZDB-GENE-031031-4    | pfkfb4b           |  |
| ENSDARG00000036180 | 11.6321778  | -3.709669329 | 0.612412911 | -6.057464279 | 1.38284E-09 | 2.93758E-07 | ccnb2             | ZDB-GENE-030429-12   | ccnb2             |  |
| ENSDARG00000068708 | 207.9882285 | -0.80513097  | 0.132924849 | -6.057038825 | 1.3865E-09  | 2.93758E-07 | ifrd1             | ZDB-GENE-030131-6132 | ifrd1             |  |
| ENSDARG00000071076 | 404.0198113 | -2.313821177 | 0.382597576 | -6.047662928 | 1.46962E-09 | 3.08286E-07 | ldhbb             | ZDB-GENE-040718-176  | ldhbb             |  |
| ENSDARG00000036848 | 112.7729195 | -1.270467616 | 0.211390402 | -6.010053459 | 1.85462E-09 | 3.84168E-07 | slc43a2a          | ZDB-GENE-040426-964  | slc43a2a          |  |
| ENSDARG00000028507 | 704.107608  | -0.97638854  | 0.16248983  | -6.008920921 | 1.86762E-09 | 3.84168E-07 | itgb4             | ZDB-GENE-030131-7209 | itgb4             |  |
| ENSDARG00000102572 | 70.05706488 | -1.397063495 | 0.233186398 | -5.991187765 | 2.08314E-09 | 4.2438E-07  | si:ch211-260e23.9 | ZDB-GENE-141222-48   | si:ch211-260e23.9 |  |
| ENSDARG00000026771 | 89.17723123 | -1.094556744 | 0.183538616 | -5.963631902 | 2.46692E-09 | 4.97778E-07 | tmem41ab          | ZDB-GENE-040426-2050 | tmem41ab          |  |
| ENSDARG00000102911 | 20.5409113  | -1.133208667 | 0.19013062  | -5.960158675 | 2.51993E-09 | 5.03677E-07 | iffo2b            | ZDB-GENE-121030-9    | iffo2b            |  |
| ENSDARG00000005799 | 113.8297985 | -0.693973132 | 0.116900852 | -5.93642492  | 2.91304E-09 | 5.7681E-07  | smim14            | ZDB-GENE-040426-22   | smim14            |  |
| ENSDARG00000037551 | 122.8325767 | 1.627300227  | 0.274206576 | 5.934577675  | 2.94603E-09 | 5.7794E-07  | pm20d1.1          | ZDB-GENE-051120-102  | pm20d1.1          |  |
| ENSDARG00000063572 | 867.7332935 | -0.685067367 | 0.115779206 | -5.917015576 | 3.27836E-09 | 6.37234E-07 | perp              | ZDB-GENE-050104-1    | perp              |  |
| ENSDARG00000100528 | 4.811134859 | -5.730628403 | 0.982063707 | -5.835291908 | 5.36965E-09 | 1.03424E-06 | map1lc3c          | ZDB-GENE-040426-1080 | map1lc3c          |  |
| ENSDARG0000007671  | 217.6649865 | -0.868193106 | 0.149849048 | -5.793784603 | 6.88177E-09 | 1.31355E-06 | ghrb              | ZDB-GENE-071119-4    | ghrb              |  |
| ENSDARG00000103380 | 43.34865669 | 1.870214065  | 0.323072359 | 5.788839598  | 7.08743E-09 | 1.34073E-06 | si:ch73-21k16.1   | ZDB-GENE-081031-51   | si:ch73-21k16.1   |  |
| ENSDARG00000069735 | 21.67953976 | -3.527292582 | 0.609579573 | -5.786435004 | 7.18959E-09 | 1.34802E-06 | hbaa2             | ZDB-GENE-081104-38   | hbaa2             |  |
| ENSDARG00000096095 | 9.562828454 | -5.145793871 | 0.889934033 | -5.782219444 | 7.37215E-09 | 1.37012E-06 | buc               | ZDB-GENE-070117-694  | buc               |  |
| ENSDARG00000069498 | 13.38539347 | -1.643594054 | 0.284750664 | -5.77204644  | 7.83145E-09 | 1.44283E-06 | phkg1b            | ZDB-GENE-050522-52   | phkg1b            |  |
| ENSDARG00000087093 | 60.60172512 | -1.835302492 | 0.318561923 | -5.761211123 | 8.35125E-09 | 1.52533E-06 | si:ch211-157c3.4  | ZDB-GENE-030131-8454 | si:ch211-157c3.4  |  |
| ENSDARG00000000887 | 4.401186429 | -4.112561559 | 0.716341341 | -5.741064105 | 9.40835E-09 | 1.70371E-06 | zgc:56699         | ZDB-GENE-040426-2099 | zgc:56699         |  |
| ENSDARG00000039093 | 1349.623767 | -0.644698765 | 0.112567512 | -5.727218733 | 1.02091E-08 | 1.83304E-06 | got1              | ZDB-GENE-040426-2003 | got1              |  |
| ENSDARG00000093584 | 40.98829869 | -2.18527081  | 0.381668026 | -5.725579982 | 1.03081E-08 | 1.83527E-06 | zgc:193505        | ZDB-GENE-030131-7103 | zgc:193505        |  |
| ENSDARG00000037995 | 6.38186848  | -5.175616941 | 0.904827088 | -5.720006632 | 1.0652E-08  | 1.8807E-06  | gdf3              | ZDB-GENE-980526-389  | gdf3              |  |
| ENSDARG00000007465 | 7.343648742 | -3.454009438 | 0.604900064 | -5.710049715 | 1.12943E-08 | 1.97763E-06 | tldr1             | ZDB-GENE-070803-1    | tldr1             |  |
| ENSDARG00000079467 | 9.566629182 | -2.445884929 | 0.430683688 | -5.679074911 | 1.35425E-08 | 2.35185E-06 | si:ch73-15b2.5    | ZDB-GENE-030131-5406 | si:ch73-15b2.5    |  |
| ENSDARG00000014357 | 3.385509596 | -4.718727798 | 0.831966684 | -5.671774953 | 1.41326E-08 | 2.43436E-06 | amh               | ZDB-GENE-050706-192  | amh               |  |
| ENSDARG00000054978 | 175.347479  | 1.053601058  | 0.185937348 | 5.666430487  | 1.45803E-08 | 2.49123E-06 | kifc3             | ZDB-GENE-030131-3724 | kifc3             |  |
| ENSDARG00000020455 | 61.03755574 | -0.935052092 | 0.165490273 | -5.650193661 | 1.60267E-08 | 2.71646E-06 | si:ch211-171h4.3  | ZDB-GENE-081031-85   | si:ch211-171h4.3  |  |
| ENSDARG00000051861 | 469.5602254 | -0.906517374 | 0.161736185 | -5.604913801 | 2.08359E-08 | 3.48184E-06 | pkp3a             | ZDB-GENE-060512-114  | pkp3a             |  |
| ENSDARG00000103038 | 97.76709608 | -0.846976366 | 0.151121053 | -5.604621911 | 2.0871E-08  | 3.48184E-06 | pik3r3a           | ZDB-GENE-040426-1978 | pik3r3a           |  |
| ENSDARG00000020114 | 151.9891844 | -1.096233733 | 0.197763472 | -5.54315579  | 2.97068E-08 | 4.91718E-06 | slc20a1a          | ZDB-GENE-040426-2217 | slc20a1a          |  |
| ENSDARG00000095615 | 31.66633725 | -1.699239094 | 0.306698429 | -5.540423205 | 3.01742E-08 | 4.95581E-06 | si:dkeyp-86h10.3  | ZDB-GENE-100922-65   | si:dkeyp-86h10.3  |  |
| ENSDARG00000094265 | 21.24000331 | 1.389258008  | 0.251666459 | 5.520235049  | 3.38547E-08 | 5.51753E-06 | si:dkey-183n20.15 | ZDB-GENE-041001-160  | si:dkey-183n20.15 |  |
| ENSDARG00000054848 | 129.9964219 | -1.137102451 | 0.2061534   | -5.51580742  | 3.47182E-08 | 5.61508E-06 | pdk4              | ZDB-GENE-060503-754  | pdk4              |  |
| ENSDARG00000040253 | 62.46944014 | -1.744079694 | 0.316386296 | -5.512500749 | 3.53771E-08 | 5.6563E-06  | onecutl           | ZDB-GENE-020531-1    | onecutl           |  |
| ENSDARG00000069888 | 106.9338544 | -1.03137903  | 0.187120115 | -5.511855471 | 3.5507E-08  | 5.6563E-06  | cldna             | ZDB-GENE-010328-1    | cldna             |  |
| ENSDARG00000106630 | 11.83782273 | -2.104201006 | 0.382043354 | -5.507754504 | 3.6344E-08  | 5.74642E-06 | L0018627.1        |                      |                   |  |
| ENSDARG00000038106 | 119.5873487 | -0.673629135 | 0.123374202 | -5.460048563 | 4.76004E-08 | 7.47045E-06 | slc37a4a          | ZDB-GENE-040426-2230 | slc37a4a          |  |
| ENSDARG00000097877 | 164.6195781 | -0.698252142 | 0.127948858 | -5.457275275 | 4.83496E-08 | 7.53224E-06 | si:ch211-167b20.8 | ZDB-GENE-081104-147  | si:ch211-167b20.8 |  |
| ENSDARG00000089302 | 185.4494855 | 0.529320697  | 0.097220403 | 5.444543346  | 5.19385E-08 | 8.03226E-06 | hnrnpa0a          | ZDB-GENE-030131-2249 | hnrnpa0a          |  |
| ENSDARG00000116430 | 5.118997162 | -2.75906785  | 0.507543221 | -5.436123928 | 5.44521E-08 | 8.35997E-06 | si:ch73-329n5.2   | ZDB-GENE-131121-66   | si:ch73-329n5.2   |  |
| ENSDARG00000019613 | 383.418124  | -0.635240895 | 0.116896948 | -5.434195716 | 5.50441E-08 | 8.39007E-06 | ip6k2b            | ZDB-GENE-040718-85   | ip6k2b            |  |
| ENSDARG00000069926 | 1.996948122 | -4.377548307 | 0.805811814 | -5.432469755 | 5.55794E-08 | 8.41114E-06 | hsd3b1            | ZDB-GENE-081105-30   | hsd3b1            |  |
| ENSDARG00000042620 | 1601.330862 | 0.661952332  | 0.121903491 | 5.430134344  | 5.63116E-08 | 8.46152E-06 | gstr              | ZDB-GENE-090507-1    | gstr              |  |
| ENSDARG00000061994 | 748.3631622 | -0.772719341 | 0.142916786 | -5.406778048 | 6.41686E-08 | 9.57422E-06 | acacb             | ZDB-GENE-060526-132  | acacb             |  |
| ENSDARG00000059646 | 107.7855135 | -0.804434424 | 0.148902825 | -5.402412116 | 6.57507E-08 | 9.74167E-06 | nt5dc2            | ZDB-GENE-060810-17   | nt5dc2            |  |
| ENSDARG00000003701 | 5.354620319 | -7.012464649 | 1.300568411 | -5.39184605  | 6.97375E-08 | 1.02606E-05 | cldng             | ZDB-GENE-010328-7    | cldng             |  |
| ENSDARG00000094055 | 8.339087859 | -3.187988659 | 0.592103253 | -5.384176908 | 7.27769E-08 | 1.0634E-05  | si:dkey-88l16.3   | ZDB-GENE-030131-6015 | si:dkey-88l16.3   |  |

|                     |             |              |             |              |              |             |                   |                      |                     |                   |
|---------------------|-------------|--------------|-------------|--------------|--------------|-------------|-------------------|----------------------|---------------------|-------------------|
| ENSDARG00000104129  | 10.54542637 | -2.020680506 | 0.3767145   | -5.363957333 | 8.14181E-08  | 1.17473E-05 | si:dkey-23n7.10   | ZDB-GENE-141222-64   | si:dkey-23n7.10     |                   |
| ENSDARG00000063435  | 84.29200412 | -0.869594552 | 0.162123951 | -5.363763641 | 8.15055E-08  | 1.17473E-05 | trpm4b.2          | ZDB-GENE-061214-2    | trpm4b.2            |                   |
| ENSDARG00000100792  | 1075.127895 | -1.325527458 | 0.247193338 | -5.362310613 | 8.21641E-08  | 1.17622E-05 | zgc:154142        | ZDB-GENE-070615-2    | zgc:154142          |                   |
| ENSDARG00000012609  | 2780.628526 | -1.891129451 | 0.352858081 | -5.359461926 | 8.34702E-08  | 1.1869E-05  | hpx a             |                      |                     |                   |
| ENSDARG00000116617  | 140.6580518 | -0.875010889 | 0.163979349 | -5.336104178 | 9.49649E-08  | 1.34116E-05 | spaca4l           | ZDB-GENE-101011-2    | spaca4l             |                   |
| ENSDARG00000070826  | 24.76807287 | -1.086879872 | 0.203729206 | -5.334924194 | 9.55845E-08  | 1.34116E-05 | bpgm              | ZDB-GENE-040718-375  | bpgm                |                   |
| ENSDARG00000076773  | 126.57819   | 1.257909176  | 0.236159614 | 5.326521141  | 1.00112E-07  | 1.39544E-05 | lrrc58a           | ZDB-GENE-090312-76   | lrrc58a             |                   |
| ENSDARG00000088762  | 7.59543125  | -2.047466799 | 0.384669163 | -5.322669437 | -5.322669437 | 1.02255E-07 | 1.416E-05         | si:ch211-224l10.4    | ZDB-GENE-090312-125 | si:ch211-224l10.4 |
| ENSDARG00000098408  | 99.00899531 | -1.072797373 | 0.202102257 | -5.308190947 | 1.10719E-07  | 1.51853E-05 | stbd1             | ZDB-GENE-120817-2    | stbd1               |                   |
| ENSDARG00000037618  | 102.7295178 | -2.429429454 | 0.457728588 | -5.307576403 | 1.11092E-07  | 1.51853E-05 | ddit4             | ZDB-GENE-031002-35   | ddit4               |                   |
| ENSDARG00000034600  | 116.7635806 | -0.594876105 | 0.112797535 | -5.273839583 | 1.33599E-07  | 1.81446E-05 | tmem165           | ZDB-GENE-030131-3222 | tmem165             |                   |
| ENSDARG00000091234  | 36.40978774 | -1.545506238 | 0.29318628  | -5.271413928 | 1.35377E-07  | 1.8269E-05  | si:ch73-335l21.4  | ZDB-GENE-160728-105  | si:ch73-335l21.4    |                   |
| ENSDARG00000036840  | 1102.30356  | -1.106969486 | 0.211013236 | -5.245971811 | 1.55461E-07  | 2.08465E-05 | krt15             | ZDB-GENE-040426-2931 | krt15               |                   |
| ENSDARG00000055250  | 7.502568723 | -7.106153735 | 1.355515812 | -5.24239826  | 1.58503E-07  | 2.11207E-05 | si:ch211-132b12.8 | ZDB-GENE-030131-5453 | si:ch211-132b12.8   |                   |
| ENSDARG00000070484  | 185.8256424 | -1.02134919  | 0.194988099 | -5.238007845 | 1.62319E-07  | 2.14922E-05 | zgc:195001        | ZDB-GENE-081022-173  | zgc:195001          |                   |
| ENSDARG00000026348  | 184.5826932 | 0.938303934  | 0.179172535 | 5.236873699  | 1.63319E-07  | 2.14922E-05 | csad              | ZDB-GENE-041114-36   | csad                |                   |
| ENSDARG00000095434  | 14.43394992 | -2.096260574 | 0.400490542 | -5.234232414 | 1.65672E-07  | 2.16672E-05 | si:ch211-217k17.8 | ZDB-GENE-031010-46   | si:ch211-217k17.8   |                   |
| ENSDARG00000039828  | 9.65399588  | -5.162756415 | 0.986973086 | -5.230898885 | 1.68688E-07  | 2.1823E-05  | zp3b              | ZDB-GENE-031124-2    | zp3b                |                   |
| ENSDARG00000035601  | 42.50612471 | 1.263538649  | 0.241564779 | 5.230641039  | 1.68923E-07  | 2.1823E-05  | dao.3             | ZDB-GENE-040426-1894 | dao.3               |                   |
| ENSDARG00000060112  | 5.556578412 | -3.526689742 | 0.676471832 | -5.213357862 | 1.85453E-07  | 2.36819E-05 | sybu              | ZDB-GENE-060929-1202 | sybu                |                   |
| ENSDARG00000042904  | 331.8452996 | -0.708213565 | 0.135848418 | -5.213263263 | 1.85547E-07  | 2.36819E-05 | foxo3b            | ZDB-GENE-990708-6    | foxo3b              |                   |
| ENSDARG00000017049  | 156.2836699 | -0.673218995 | 0.129619717 | -5.193800841 | 2.06044E-07  | 2.61404E-05 | adsl              | ZDB-GENE-030131-6363 | adsl                |                   |
| ENSDARG00000040815  | 442.5965278 | -0.748364894 | 0.144215611 | -5.189208648 | 2.1119E-07   | 2.66338E-05 | tsku              | ZDB-GENE-030131-4683 | tsku                |                   |
| ENSDARG00000019808  | 212.9613834 | -1.38677853  | 0.267321807 | -5.18767454  | 2.12936E-07  | 2.66952E-05 | evpla             | ZDB-GENE-030829-19   | evpla               |                   |
| ENSDARG00000075521  | 137.4276146 | 0.527901405  | 0.101917874 | 5.179674401  | 2.22274E-07  | 2.77018E-05 | cpz               | ZDB-GENE-090313-267  | cpz                 |                   |
| ENSDARG00000056379  | 45.52426318 | -0.806570631 | 0.155826429 | -5.176083643 | 2.26592E-07  | 2.80749E-05 | si:ch73-86n18.1   | ZDB-GENE-141216-19   | si:ch73-86n18.1     |                   |
| ENSDARG00000070914  | 314.0507767 | -0.720712905 | 0.139272537 | -5.174838621 | 2.28108E-07  | 2.80984E-05 | dusp6             | ZDB-GENE-030613-1    | dusp6               |                   |
| ENSDARG00000036107  | 853.4621967 | -0.864507946 | 0.167283918 | -5.167908297 | 2.36728E-07  | 2.89917E-05 | txnipa            | ZDB-GENE-030804-10   | txnipa              |                   |
| ENSDARG00000008454  | 9.086910879 | -4.527646256 | 0.878677827 | -5.152794481 | 2.56633E-07  | 3.12488E-05 | cpeb1b            | ZDB-GENE-990927-1    | cpeb1b              |                   |
| ENSDARG00000038321  | 112.5910405 | 1.243289944  | 0.24151862  | 5.147801635  | 2.63557E-07  | 3.18121E-05 | zgc:172053        | ZDB-GENE-080219-25   | zgc:172053          |                   |
| ENSDARG00000076830  | 215.6169605 | -2.266528039 | 0.440395755 | -5.146571039 | 2.65291E-07  | 3.18121E-05 | si:dkey-65b12.6   | ZDB-GENE-060526-329  | si:dkey-65b12.6     |                   |
| ENSDARG00000041699  | 9.842091584 | -3.04449311  | 0.591596017 | -5.146236657 | 2.65764E-07  | 3.18121E-05 | piwil1            | ZDB-GENE-030813-2    | piwil1              |                   |
| ENSDARG00000099247  | 5.252380094 | -4.023810014 | 0.783304063 | -5.13697069  | 2.79202E-07  | 3.32329E-05 | si:dkey-68o6.5    | ZDB-GENE-030131-5416 | si:dkey-68o6.5      |                   |
| ENSDARG00000013946  | 92.34589176 | -0.838516914 | 0.163317687 | -5.134268843 | 2.83243E-07  | 3.35255E-05 | ivns1abpb         | ZDB-GENE-030131-6266 | ivns1abpb           |                   |
| ENSDARG00000098742  | 8.39629881  | -1.712186086 | 0.333871062 | -5.128285372 | 2.92393E-07  | 3.44163E-05 | lrrtm1            | ZDB-GENE-161221-2    | lrrtm1              |                   |
| ENSDARG00000004451  | 56.88307859 | 0.706255241  | 0.139410089 | 5.066026766  | 4.06205E-07  | 4.75484E-05 | tnfrsfa           | ZDB-GENE-010802-1    | tnfrsfa             |                   |
| ENSDARG00000103642  | 2103.626207 | 2.069387211  | 0.408667961 | 5.063737332  | 4.11116E-07  | 4.78147E-05 | pglyrp6           | ZDB-GENE-071227-2    | pglyrp6             |                   |
| ENSDARG00000102435  | 18.71855072 | 1.521115956  | 0.300445435 | 5.062869249  | 4.12993E-07  | 4.78147E-05 | plekhf1           | ZDB-GENE-040426-1289 | plekhf1             |                   |
| ENSDARG00000095147  | 12.42051998 | 1.904674595  | 0.377315515 | 5.047962565  | 4.46547E-07  | 5.14184E-05 | krt96             | ZDB-GENE-030131-221  | krt96               |                   |
| ENSDARG00000020749  | 8.084687246 | -4.411466235 | 0.874874854 | -5.042396879 | 4.59737E-07  | 5.2651E-05  | caprin2           | ZDB-GENE-040812-2    | caprin2             |                   |
| ENSDARG000000101043 | 649.4205147 | -0.92313099  | 0.183387482 | -5.033773186 | 4.80919E-07  | 5.47808E-05 | ppl               | ZDB-GENE-041008-196  | ppl                 |                   |
| ENSDARG00000074289  | 16.57294797 | -3.656064937 | 0.726897934 | -5.029681292 | 4.91296E-07  | 5.56635E-05 | tuba4l            | ZDB-GENE-030131-5588 | tuba4l              |                   |
| ENSDARG00000077982  | 114.4860993 | 0.915110293  | 0.182115793 | 5.024881577  | 5.03743E-07  | 5.67703E-05 | elf3              | ZDB-GENE-030131-8760 | elf3                |                   |
| ENSDARG00000087641  | 52.46204428 | -0.850437829 | 0.169674979 | -5.012158152 | 5.38229E-07  | 6.03358E-05 | cdh26.2           | ZDB-GENE-100922-183  | cdh26.2             |                   |
| ENSDARG0000004060   | 687.1204511 | 0.616966653  | 0.123148459 | 5.009942142  | 5.44464E-07  | 6.07135E-05 | bhlhe40           | ZDB-GENE-030131-3133 | bhlhe40             |                   |
| ENSDARG00000061896  | 168.2407073 | -1.126727716 | 0.225016135 | -5.00731966  | 5.51932E-07  | 6.1224E-05  | slco2a1           | ZDB-GENE-060606-3    | slco2a1             |                   |
| ENSDARG00000108535  | 253.628981  | -0.786936226 | 0.157343263 | -5.001397652 | 5.69162E-07  | 6.28064E-05 | CABZ01072077.1    |                      |                     |                   |
| ENSDARG00000069335  | 58.73605119 | 0.79251875   | 0.158844962 | 4.989259595  | 6.06112E-07  | 6.65372E-05 | bcl6b             | ZDB-GENE-120907-1    | bcl6b               |                   |
| ENSDARG00000031702  | 65.91818218 | -1.127766921 | 0.226196074 | -4.985793519 | 6.1708E-07   | 6.73922E-05 | prkg1b            | ZDB-GENE-080225-40   | prkg1b              |                   |

|                    |             |              |             |              |             |             |                   |                      |                   |  |
|--------------------|-------------|--------------|-------------|--------------|-------------|-------------|-------------------|----------------------|-------------------|--|
| ENSDARG0000016011  | 526.7834959 | -0.715673149 | 0.143734515 | -4.979132174 | 6.387E-07   | 6.90552E-05 | gpcpd1            | ZDB-GENE-060503-472  | gpcpd1            |  |
| ENSDARG0000069734  | 26.05122144 | -3.292018447 | 0.661168173 | -4.979093948 | 6.38826E-07 | 6.90552E-05 | hbba2             | ZDB-GENE-040801-164  | hbba2             |  |
| ENSDARG0000003820  | 236.1325412 | -2.008138054 | 0.403422561 | -4.977753468 | 6.43265E-07 | 6.9182E-05  | nr1d2a            | ZDB-GENE-040504-1    | nr1d2a            |  |
| ENSDARG00000034181 | 79.02328018 | -1.134752362 | 0.228253791 | -4.971450225 | 6.64539E-07 | 7.11091E-05 | esr2b             | ZDB-GENE-030116-1    | esr2b             |  |
| ENSDARG00000025428 | 76.81668131 | -1.744078767 | 0.351234269 | -4.965571196 | 6.84992E-07 | 7.26894E-05 | socs3a            | ZDB-GENE-030131-7349 | socs3a            |  |
| ENSDARG00000034503 | 232.8437607 | 1.472493335  | 0.296560487 | 4.96523778   | 6.86169E-07 | 7.26894E-05 | per2              | ZDB-GENE-011220-2    | per2              |  |
| ENSDARG00000098761 | 25.45616945 | -1.677729146 | 0.338438773 | -4.95726045  | 7.14941E-07 | 7.53605E-05 | rgs2              | ZDB-GENE-040718-410  | rgs2              |  |
| ENSDARG00000101557 | 144.4577058 | -1.014570391 | 0.204919998 | -4.951056037 | 7.38118E-07 | 7.74184E-05 | scarb1            | ZDB-GENE-031126-1    | scarb1            |  |
| ENSDARG00000104387 | 80.84747029 | -1.230002726 | 0.248598555 | -4.947746885 | 7.50774E-07 | 7.83579E-05 | si:ch211-48m9.1   | ZDB-GENE-060531-64   | si:ch211-48m9.1   |  |
| ENSDARG00000063905 | 60057.67386 | -0.423050531 | 0.085584204 | -4.943091277 | 7.68935E-07 | 7.98599E-05 | mt-co1            | ZDB-GENE-011205-14   | mt-co1            |  |
| ENSDARG00000100020 | 197.1381125 | -0.932346489 | 0.18866001  | -4.941940204 | 7.73489E-07 | 7.99411E-05 | pim1              | ZDB-GENE-061013-139  | pim1              |  |
| ENSDARG00000092162 | 30.65475356 | 1.167696241  | 0.236980292 | 4.927398105  | 8.33319E-07 | 8.57064E-05 | mhc1zaa           | ZDB-GENE-030916-1    | mhc1zaa           |  |
| ENSDARG00000090903 | 94.82860882 | -1.114029568 | 0.226299444 | -4.922811765 | 8.53095E-07 | 8.73165E-05 | creb3l3b          | ZDB-GENE-131023-1    | creb3l3b          |  |
| ENSDARG00000012981 | 35.31998732 | -1.29602832  | 0.263904909 | -4.910967079 | 9.06283E-07 | 9.21689E-05 | osbpl7            | ZDB-GENE-041010-212  | osbpl7            |  |
| ENSDARG00000112959 | 360.547733  | -0.919286364 | 0.187214549 | -4.910336125 | 9.09204E-07 | 9.21689E-05 | CABZ01072309.1    |                      |                   |  |
| ENSDARG00000037836 | 118.581727  | -1.348289474 | 0.275128032 | -4.900589237 | 9.55496E-07 | 9.64005E-05 | igfals            | ZDB-GENE-061009-25   | igfals            |  |
| ENSDARG00000056462 | 7.944938204 | -4.56806969  | 0.936070522 | -4.880048652 | 1.0606E-06  | 0.000106497 | crp2              | ZDB-GENE-030131-5826 | crp2              |  |
| ENSDARG00000055514 | 80.7496699  | -1.07701348  | 0.220865875 | -4.876323598 | 1.08081E-06 | 0.000108015 | icn2              | ZDB-GENE-070822-9    | icn2              |  |
| ENSDARG00000043394 | 29.15709852 | -1.009215713 | 0.207169911 | -4.871439629 | 1.10788E-06 | 0.0001102   | si:dkey-71h2.2    | ZDB-GENE-041014-145  | si:dkey-71h2.2    |  |
| ENSDARG00000032618 | 63.10175182 | 0.878330423  | 0.180416402 | 4.868351281  | 1.12533E-06 | 0.000111413 | mgst1.1           | ZDB-GENE-041010-30   | mgst1.1           |  |
| ENSDARG00000013856 | 7064.840046 | 1.193051486  | 0.245144062 | 4.866736211  | 1.13456E-06 | 0.000111805 | amy2a             | ZDB-GENE-040426-2393 | amy2a             |  |
| ENSDARG00000077288 | 11.99470152 | -2.244709646 | 0.463933186 | -4.838433023 | 1.30867E-06 | 0.000128365 | si:ch211-188c16.1 | ZDB-GENE-070912-162  | si:ch211-188c16.1 |  |
| ENSDARG00000101652 | 16.96255046 | -1.736702731 | 0.359694958 | -4.828265433 | 1.37727E-06 | 0.000134471 | haus6             | ZDB-GENE-030131-5517 | haus6             |  |
| ENSDARG00000044356 | 113.8995464 | -0.833513398 | 0.172842679 | -4.822381856 | 1.41854E-06 | 0.000137865 | tp63              | ZDB-GENE-030819-1    | tp63              |  |
| ENSDARG0000007086  | 193.6672324 | -1.074926464 | 0.22390864  | -4.800736881 | 1.58083E-06 | 0.00015241  | aqp10a            | ZDB-GENE-040718-40   | aqp10a            |  |
| ENSDARG00000070052 | 9.515912892 | -2.451630327 | 0.510701506 | -4.800515174 | 1.58258E-06 | 0.00015241  | tldr6             | ZDB-GENE-041001-210  | tldr6             |  |
| ENSDARG00000057687 | 16.22314425 | -1.515037632 | 0.31687613  | -4.781166797 | 1.74281E-06 | 0.000166435 | sbk3              | ZDB-GENE-080204-39   | sbk3              |  |
| ENSDARG00000056836 | 305.2568583 | -1.135311556 | 0.237488669 | -4.780487266 | 1.74871E-06 | 0.000166435 | si:ch211-125o16.4 | ZDB-GENE-131120-100  | si:ch211-125o16.4 |  |
| ENSDARG00000016545 | 82.18082003 | -0.726676685 | 0.152020126 | -4.780134726 | 1.75178E-06 | 0.000166435 | zgc:154046        | ZDB-GENE-061103-289  | zgc:154046        |  |
| ENSDARG00000033170 | 29.11207634 | -0.977312517 | 0.204626742 | -4.776074266 | 1.7875E-06  | 0.000169071 | sult2st1          | ZDB-GENE-030219-114  | sult2st1          |  |
| ENSDARG00000043442 | 9.672388671 | -2.488758127 | 0.522016416 | -4.767585944 | 1.86446E-06 | 0.000175072 | zgc:153665        | ZDB-GENE-061027-365  | zgc:153665        |  |
| ENSDARG00000032617 | 148.7796698 | 0.771000348  | 0.161728195 | 4.767259942  | 1.86748E-06 | 0.000175072 | fgfrl1a           | ZDB-GENE-040128-2    | fgfrl1a           |  |
| ENSDARG00000014554 | 311.5419292 | 0.854056828  | 0.179454042 | 4.759195284  | 1.94366E-06 | 0.000181411 | ppp1r3cb          | ZDB-GENE-040426-1733 | ppp1r3cb          |  |
| ENSDARG00000069758 | 3.849424386 | -4.050463946 | 0.851645648 | -4.756043733 | 1.97424E-06 | 0.000183457 | si:dkey-189g17.2  | ZDB-GENE-030131-5562 | si:dkey-189g17.2  |  |
| ENSDARG00000019706 | 9.293315543 | -4.618328224 | 0.971647438 | -4.753090515 | 2.00331E-06 | 0.000185345 | zar1              | ZDB-GENE-030818-1    | zar1              |  |
| ENSDARG00000036833 | 38.0507555  | -2.502992954 | 0.527661204 | -4.743560707 | 2.09994E-06 | 0.000193441 | upp2              | ZDB-GENE-040426-830  | upp2              |  |
| ENSDARG00000039007 | 3661.598659 | -0.619548089 | 0.130661618 | -4.741622659 | 2.12013E-06 | 0.000194456 | eno3              | ZDB-GENE-031006-5    | eno3              |  |
| ENSDARG00000001234 | 36.03042143 | -1.06266182  | 0.224300513 | -4.737670046 | 2.16189E-06 | 0.000197431 | map4k2            | ZDB-GENE-030616-163  | map4k2            |  |
| ENSDARG00000053835 | 58.03080863 | 0.916176583  | 0.193762419 | 4.728350245  | 2.26351E-06 | 0.000205475 | plekhh1           | ZDB-GENE-061219-1    | plekhh1           |  |
| ENSDARG00000067741 | 231.8302681 | -0.685370927 | 0.144965353 | -4.727825736 | 2.26937E-06 | 0.000205475 | itpkcb            | ZDB-GENE-080225-27   | itpkcb            |  |
| ENSDARG00000019360 | 610.6562594 | -0.576822601 | 0.122083153 | -4.724833755 | 2.30304E-06 | 0.000207636 | sec23b            | ZDB-GENE-030131-5479 | sec23b            |  |
| ENSDARG00000077688 | 408.070716  | -1.050319192 | 0.222515445 | -4.720208042 | 2.35604E-06 | 0.000211514 | cpo               | ZDB-GENE-070619-6    | cpo               |  |
| ENSDARG00000033845 | 66.27410513 | -1.014888317 | 0.215287103 | -4.714115733 | 2.42763E-06 | 0.000216707 | igsf9ba           | ZDB-GENE-060503-729  | igsf9ba           |  |
| ENSDARG00000044976 | 54.78008989 | -7.781012743 | 1.650797139 | -4.713488145 | 2.43512E-06 | 0.000216707 | krt93             | ZDB-GENE-060421-4592 | krt93             |  |
| ENSDARG00000045708 | 39.20718367 | 1.775680674  | 0.376786271 | 4.712700044  | 2.44456E-06 | 0.000216707 | adm2a             | ZDB-GENE-041210-100  | adm2a             |  |
| ENSDARG00000042667 | 576.2979129 | -1.310311304 | 0.278096484 | -4.711714744 | 2.45641E-06 | 0.00021685  | klf2a             | ZDB-GENE-011109-1    | klf2a             |  |
| ENSDARG00000042807 | 134.0536702 | -0.822784306 | 0.174881242 | -4.704817369 | 2.54093E-06 | 0.00022282  | slc16a4           | ZDB-GENE-070112-602  | slc16a4           |  |
| ENSDARG00000026862 | 132.6967967 | -0.483973581 | 0.102874921 | -4.704485572 | 2.54507E-06 | 0.00022282  | aktip             | ZDB-GENE-030909-5    | aktip             |  |
| ENSDARG00000004529 | 2.766389635 | -4.377434143 | 0.930811495 | -4.702814874 | 2.56599E-06 | 0.000223727 | zgc:173742        | ZDB-GENE-030131-6489 | zgc:173742        |  |

|                    |             |              |             |              |             |             |                  |                      |                  |  |
|--------------------|-------------|--------------|-------------|--------------|-------------|-------------|------------------|----------------------|------------------|--|
| ENSDARG0000040277  | 14.51839707 | -1.845821075 | 0.393100353 | -4.695546726 | 2.65895E-06 | 0.000230881 | fbxo32           | ZDB-GENE-040426-1040 | fbxo32           |  |
| ENSDARG0000067851  | 57.08642536 | -0.955932462 | 0.204103396 | -4.6835696   | 2.81922E-06 | 0.000242983 | lcn15            | ZDB-GENE-060825-349  | lcn15            |  |
| ENSDARG0000006215  | 438.478109  | 0.770623716  | 0.164542877 | 4.683421909  | 2.82125E-06 | 0.000242983 | akr1b1           | ZDB-GENE-040625-7    | akr1b1           |  |
| ENSDARG0000097414  | 40.24083625 | -1.476038043 | 0.315525328 | -4.67803347  | 2.89639E-06 | 0.000248135 | si:ch211-106e7.2 | ZDB-GENE-031116-72   | si:ch211-106e7.2 |  |
| ENSDARG0000093237  | 7.954390689 | -3.543936726 | 0.757699628 | -4.677231707 | 2.90774E-06 | 0.000248135 | si:ch211-89o9.4  | ZDB-GENE-090313-134  | si:ch211-89o9.4  |  |
| ENSDARG0000033140  | 19.26124149 | -1.331017614 | 0.284610084 | -4.676635468 | 2.9162E-06  | 0.000248135 | desi1a           | ZDB-GENE-040426-1657 | desi1a           |  |
| ENSDARG0000007344  | 220.6744697 | -1.117142093 | 0.239093167 | -4.672413289 | 2.97681E-06 | 0.000252279 | tcap             | ZDB-GENE-070501-5    | tcap             |  |
| ENSDARG0000046098  | 121.6148152 | 1.879921027  | 0.402910657 | 4.665850834  | 3.07343E-06 | 0.000259429 | ebp              | ZDB-GENE-040718-12   | ebp              |  |
| ENSDARG0000037532  | 4.291787297 | -3.802735494 | 0.817766754 | -4.650146846 | 3.31699E-06 | 0.000278877 | mcm3l            | ZDB-GENE-040121-2    | mcm3l            |  |
| ENSDARG0000092551  | 5.668152371 | -3.034316073 | 0.654118292 | -4.638787982 | 3.50458E-06 | 0.000293485 | si:dkey-56e3.2   | ZDB-GENE-090313-316  | si:dkey-56e3.2   |  |
| ENSDARG0000078448  | 50.71240147 | 1.0467842    | 0.226055436 | 4.63065263   | 3.64515E-06 | 0.000303669 | gpr137ba         | ZDB-GENE-100721-1    | gpr137ba         |  |
| ENSDARG0000020876  | 263.3240618 | -1.412027832 | 0.304973309 | -4.630004626 | 3.65658E-06 | 0.000303669 | pdk2a            | ZDB-GENE-120910-1    | pdk2a            |  |
| ENSDARG0000021439  | 691.9110344 | -0.48091816  | 0.103885918 | -4.629291155 | 3.6692E-06  | 0.000303669 | ncoa4            | ZDB-GENE-040426-689  | ncoa4            |  |
| ENSDARG00000105117 | 163.919884  | -0.726590625 | 0.157506098 | -4.613095207 | 3.96716E-06 | 0.000326626 | sdad1            | ZDB-GENE-021213-1    | sdad1            |  |
| ENSDARG0000079104  | 53.51861546 | 0.598388657  | 0.129730299 | 4.612558993  | 3.97742E-06 | 0.000326626 | mfhas1           | ZDB-GENE-080917-20   | mfhas1           |  |
| ENSDARG0000007241  | 130.3973389 | -0.953548766 | 0.207333128 | -4.599114349 | 4.24291E-06 | 0.000347083 | mycb             | ZDB-GENE-040426-780  | mycb             |  |
| ENSDARG0000094992  | 2.189712385 | -5.06967703  | 1.106704982 | -4.58087486  | 4.63035E-06 | 0.00037732  | otx1             | ZDB-GENE-980526-400  | otx1             |  |
| ENSDARG0000074663  | 79.1499591  | -0.829356042 | 0.181614313 | -4.566578632 | 4.95749E-06 | 0.000402431 | SAMD8            | ZDB-GENE-070410-30   | zgc:162183       |  |
| ENSDARG0000056885  | 289.2717808 | -0.741188605 | 0.162702616 | -4.555480581 | 5.22659E-06 | 0.000422656 | per1a            | ZDB-GENE-011220-1    | per1a            |  |
| ENSDARG0000055093  | 26.53489775 | -1.425449912 | 0.31299964  | -4.554158316 | 5.25957E-06 | 0.000423706 | cdh27            | ZDB-GENE-141215-13   | cdh27            |  |
| ENSDARG0000002259  | 11.71944231 | 2.528289125  | 0.555287603 | 4.553116457  | 5.2857E-06  | 0.000424197 | ca15c            | ZDB-GENE-061013-737  | ca15c            |  |
| ENSDARG0000079308  | 67.30386855 | -1.250982432 | 0.274889187 | -4.550860829 | 5.34269E-06 | 0.000427153 | tor3a            | ZDB-GENE-081104-165  | tor3a            |  |
| ENSDARG0000023479  | 9.768034571 | -5.037639264 | 1.110243375 | -4.537418891 | 5.69469E-06 | 0.000453584 | lrp13            | ZDB-GENE-130729-1    | lrp13            |  |
| ENSDARG0000013236  | 129.5605399 | 1.158368757  | 0.255744742 | 4.529394222  | 5.9153E-06  | 0.000469392 | dhcr24           | ZDB-GENE-041212-73   | dhcr24           |  |
| ENSDARG0000069251  | 24.82923085 | -5.926573322 | 1.30907538  | -4.527297215 | 5.97429E-06 | 0.000472303 | si:dkeyp-50f7.2  | ZDB-GENE-030131-5968 | si:dkeyp-50f7.2  |  |
| ENSDARG0000055342  | 77.25562655 | -0.964277185 | 0.213065489 | -4.525731446 | 6.0187E-06  | 0.000474045 | slc16a13         | ZDB-GENE-120907-2    | slc16a13         |  |
| ENSDARG0000014039  | 4.000310908 | -3.194235683 | 0.706372726 | -4.52202579  | 6.12506E-06 | 0.000480636 | si:dkeyp-93d12.1 | ZDB-GENE-041014-303  | si:dkeyp-93d12.1 |  |
| ENSDARG0000056387  | 4.087708094 | -3.087451936 | 0.683900336 | -4.51447641  | 6.34734E-06 | 0.00049624  | rnf17            | ZDB-GENE-030131-6451 | rnf17            |  |
| ENSDARG0000040725  | 14.29354158 | -1.566429349 | 0.348916593 | -4.489409155 | 7.1421E-06  | 0.000556322 | zgc:114130       | ZDB-GENE-050913-48   | zgc:114130       |  |
| ENSDARG00000111240 | 19.64636802 | -1.938191722 | 0.432818737 | -4.478067965 | 7.53216E-06 | 0.000584556 | dhcr13a.2        | ZDB-GENE-040912-69   | dhcr13a.2        |  |
| ENSDARG0000043257  | 1250.704529 | 0.531812874  | 0.118961752 | 4.470452618  | 7.80542E-06 | 0.000602277 | ckbb             | ZDB-GENE-020103-2    | ckbb             |  |
| ENSDARG0000061778  | 12.28927138 | -1.869417435 | 0.418202383 | -4.470126218 | 7.81735E-06 | 0.000602277 | fmn2b            | ZDB-GENE-080225-35   | fmn2b            |  |
| ENSDARG0000045768  | 218.1186905 | 0.642086954  | 0.14374268  | 4.466919313  | 7.9354E-06  | 0.000609157 | cry1a            | ZDB-GENE-010426-2    | cry1a            |  |
| ENSDARG0000007823  | 69.5699399  | 1.105309888  | 0.247520571 | 4.46552739   | 7.98718E-06 | 0.000610918 | atf3             | ZDB-GENE-040426-728  | atf3             |  |
| ENSDARG00000102362 | 174.7170902 | -0.514545535 | 0.115284386 | -4.463271683 | 8.07176E-06 | 0.000615167 | slc25a12         | ZDB-GENE-031006-11   | slc25a12         |  |
| ENSDARG0000079957  | 1.828023984 | -4.731467117 | 1.060915447 | -4.459796611 | 8.20375E-06 | 0.000622985 | eloal            | ZDB-GENE-131029-2    | eloal            |  |
| ENSDARG0000055622  | 2.881173194 | -3.625156917 | 0.814145532 | -4.452713641 | 8.47918E-06 | 0.000641601 | zgc:153345       | ZDB-GENE-061103-487  | zgc:153345       |  |
| ENSDARG00000115257 | 18.9305605  | 1.982133947  | 0.445505168 | 4.449182836  | 8.61976E-06 | 0.000649918 | si:ch73-338o16.4 | ZDB-GENE-131119-14   | si:ch73-338o16.4 |  |
| ENSDARG0000092872  | 43.1242304  | -0.921629215 | 0.207615722 | -4.439110909 | 9.03313E-06 | 0.00067867  | upk3b            | ZDB-GENE-060526-348  | upk3b            |  |
| ENSDARG0000062182  | 60.40142809 | -0.862870459 | 0.194586036 | -4.434390445 | 9.23332E-06 | 0.000691259 | slc22a7b.3       | ZDB-GENE-131120-103  | slc22a7b.3       |  |
| ENSDARG00000115978 | 13.24877026 | -3.39530648  | 0.767673441 | -4.422852608 | 9.74062E-06 | 0.000726671 | AL935186.9       |                      |                  |  |
| ENSDARG0000098995  | 4.287204823 | -4.039990443 | 0.913707018 | -4.421538154 | 9.80008E-06 | 0.000728541 | cyp2k6           | ZDB-GENE-040426-1571 | cyp2k6           |  |
| ENSDARG0000015657  | 14.01905667 | -2.023613658 | 0.457950846 | -4.418844674 | 9.92299E-06 | 0.000735099 | zgc:77112        | ZDB-GENE-040426-2219 | zgc:77112        |  |
| ENSDARG0000060796  | 507.003809  | -0.466512653 | 0.105603469 | -4.417588321 | 9.98083E-06 | 0.000736808 | slc20a2          | ZDB-GENE-060929-828  | slc20a2          |  |
| ENSDARG0000010003  | 177.9191593 | -0.810151846 | 0.183595393 | -4.412702486 | 1.02088E-05 | 0.000751022 | glulb            | ZDB-GENE-030131-8417 | glulb            |  |
| ENSDARG0000091503  | 29.1866535  | -0.854251442 | 0.19377113  | -4.408558907 | 1.04061E-05 | 0.000762884 | CABZ01073954.1   |                      |                  |  |
| ENSDARG0000042014  | 1.568967379 | -4.033074209 | 0.915388113 | -4.405862552 | 1.05364E-05 | 0.000769773 | cyp11c1          | ZDB-GENE-070828-1    | cyp11c1          |  |
| ENSDARG0000055678  | 615.4673822 | 0.49255262   | 0.111924161 | 4.400771174  | 1.07867E-05 | 0.000785352 | akap12b          | ZDB-GENE-030131-9753 | akap12b          |  |
| ENSDARG0000034677  | 101.6277108 | -1.120147976 | 0.254837538 | -4.395537577 | 1.10499E-05 | 0.000801761 | sce1             | ZDB-GENE-030616-15   | sce1             |  |

|                    |             |              |             |              |             |             |                   |                      |                   |  |
|--------------------|-------------|--------------|-------------|--------------|-------------|-------------|-------------------|----------------------|-------------------|--|
| ENSDARG0000043323  | 71.9522898  | -0.637576745 | 0.145150817 | -4.392512258 | 1.12048E-05 | 0.000810228 | lnx1              | ZDB-GENE-030131-9439 | lnx1              |  |
| ENSDARG0000014373  | 7.630342945 | -3.308275376 | 0.753827254 | -4.38863859  | 1.14062E-05 | 0.000821987 | ddx4              | ZDB-GENE-990415-272  | ddx4              |  |
| ENSDARG0000041051  | 65.62418397 | -1.063032539 | 0.242447781 | -4.3845835   | 1.16208E-05 | 0.000834476 | mid1ip1a          | ZDB-GENE-990415-81   | mid1ip1a          |  |
| ENSDARG0000032801  | 20.65003017 | 1.273333416  | 0.290457991 | 4.383881514  | 1.16583E-05 | 0.000834476 | grk5              | ZDB-GENE-091204-274  | grk5              |  |
| ENSDARG0000043587  | 150.590179  | -0.586547446 | 0.134174714 | -4.371519988 | 1.23385E-05 | 0.000878899 | srd5a2a           | ZDB-GENE-050417-199  | srd5a2a           |  |
| ENSDARG0000023082  | 78.51369721 | -1.602738392 | 0.366697774 | -4.370733902 | 1.2383E-05  | 0.000878899 | krt1-19d          | ZDB-GENE-060316-1    | krt1-19d          |  |
| ENSDARG0000069744  | 2.35429704  | -5.068868357 | 1.159888247 | -4.370135113 | 1.2417E-05  | 0.000878899 | mos               | ZDB-GENE-040428-3    | mos               |  |
| ENSDARG00000099060 | 24.91848828 | -6.531614649 | 1.494770183 | -4.369644728 | 1.24449E-05 | 0.000878899 | zgc:111868        | ZDB-GENE-050809-138  | zgc:111868        |  |
| ENSDARG0000038222  | 13.72164901 | -1.168880305 | 0.267954984 | -4.36222639  | 1.28746E-05 | 0.000906223 | tyw3              | ZDB-GENE-040718-355  | tyw3              |  |
| ENSDARG0000070709  | 30.584484   | -5.816174637 | 1.333735186 | -4.360816673 | 1.29578E-05 | 0.000909062 | wu:fi42e03        | ZDB-GENE-030131-6284 | wu:fi42e03        |  |
| ENSDARG0000062460  | 64.43505207 | -0.607790952 | 0.139581203 | -4.354389708 | 1.33438E-05 | 0.000933054 | sgk3              | ZDB-GENE-070424-62   | sgk3              |  |
| ENSDARG0000090468  | 48.83622291 | -1.097203786 | 0.252055247 | -4.35302895  | 1.34269E-05 | 0.000935778 | ppp1r3aa          | ZDB-GENE-110914-122  | ppp1r3aa          |  |
| ENSDARG0000070214  | 328.4396724 | -0.824717544 | 0.189507737 | -4.351893785 | 1.34967E-05 | 0.000936752 | slc41a1           | ZDB-GENE-030131-4700 | slc41a1           |  |
| ENSDARG0000043457  | 8660.890259 | -0.559688849 | 0.12862378  | -4.35136371  | 1.35293E-05 | 0.000936752 | gapdh             | ZDB-GENE-030115-1    | gapdh             |  |
| ENSDARG0000043963  | 27.98078069 | -1.559538634 | 0.359155488 | -4.342238077 | 1.41039E-05 | 0.00097335  | si:ch211-241j12.3 | ZDB-GENE-040724-72   | si:ch211-241j12.3 |  |
| ENSDARG0000012199  | 111.2853656 | -0.852029878 | 0.196459742 | -4.336918451 | 1.44494E-05 | 0.000993961 | gpt2              | ZDB-GENE-030729-8    | gpt2              |  |
| ENSDARG0000059388  | 113.0050972 | 0.575710386  | 0.132846853 | 4.333639613  | 1.46664E-05 | 0.001005548 | bdh1              | ZDB-GENE-070410-130  | bdh1              |  |
| ENSDARG0000015890  | 153.5467796 | -0.866843564 | 0.200058755 | -4.332944915 | 1.47128E-05 | 0.001005548 | mafa              | ZDB-GENE-010605-2    | mafa              |  |
| ENSDARG0000038429  | 130.2648377 | -0.70460148  | 0.162753313 | -4.32926045  | 1.49611E-05 | 0.00101923  | csrn1b            | ZDB-GENE-030131-1515 | csrn1b            |  |
| ENSDARG0000089724  | 21.815473   | -1.466070334 | 0.338732332 | -4.328108642 | 1.50395E-05 | 0.00102129  | cylb              | ZDB-GENE-100208-1    | cylb              |  |
| ENSDARG0000005989  | 128.1434946 | 0.483578155  | 0.111938487 | 4.320034749  | 1.56005E-05 | 0.001055997 | rgl1              | ZDB-GENE-040426-1816 | rgl1              |  |
| ENSDARG0000054835  | 23.71175891 | -1.131685501 | 0.262006475 | -4.319303556 | 1.56522E-05 | 0.001056127 | ugt5f1            | ZDB-GENE-100406-6    | ugt5f1            |  |
| ENSDARG00000102335 | 45.75827611 | -0.95050314  | 0.220339635 | -4.313809173 | 1.60465E-05 | 0.001079296 | ano1              | ZDB-GENE-121127-3    | ano1              |  |
| ENSDARG0000005565  | 125.3793092 | -0.893427411 | 0.207475077 | -4.306191495 | 1.66089E-05 | 0.001113587 | entpd8            | ZDB-GENE-040724-142  | entpd8            |  |
| ENSDARG0000056986  | 40.59267571 | 0.905763373  | 0.21102816  | 4.29214458   | 1.76956E-05 | 0.0011827   | dact2             | ZDB-GENE-030131-9975 | dact2             |  |
| ENSDARG00000109628 | 4.437594282 | 2.165545493  | 0.505119971 | 4.287190403  | 1.80947E-05 | 0.001203168 | CR944667.2        |                      |                   |  |
| ENSDARG0000044774  | 5.807763861 | -2.984983697 | 0.696297565 | -4.28693686  | 1.81154E-05 | 0.001203168 | pou5f3            | ZDB-GENE-980526-485  | pou5f3            |  |
| ENSDARG0000041602  | 42.29408662 | -0.653414419 | 0.152639658 | -4.280764418 | 1.86252E-05 | 0.001233166 | zgc:92335         | ZDB-GENE-040718-152  | zgc:92335         |  |
| ENSDARG0000075564  | 132.6191954 | -0.788897201 | 0.184354547 | -4.279239189 | 1.87533E-05 | 0.001237778 | fam13a            | ZDB-GENE-050208-102  | fam13a            |  |
| ENSDARG0000062370  | 114.8330058 | -0.570566115 | 0.133856657 | -4.262515788 | 2.02138E-05 | 0.001330032 | bcl2l13           | ZDB-GENE-050419-215  | bcl2l13           |  |
| ENSDARG0000043492  | 7.673014846 | 1.721048381  | 0.404129748 | 4.258653047  | 2.05662E-05 | 0.001349031 | irf1a             | ZDB-GENE-060421-4031 | irf1a             |  |
| ENSDARG0000029995  | 8993.102577 | -0.657293638 | 0.154369469 | -4.257925112 | 2.06333E-05 | 0.001349253 | tnni2b.2          | ZDB-GENE-040801-9    | tnni2b.2          |  |
| ENSDARG0000027355  | 2505.201806 | -0.543273221 | 0.128117856 | -4.240417684 | 2.23104E-05 | 0.001454434 | slc25a4           | ZDB-GENE-030131-5275 | slc25a4           |  |
| ENSDARG0000024831  | 19.08429918 | 0.994045095  | 0.234753293 | 4.234424503  | 2.29138E-05 | 0.001485636 | crhbp             | ZDB-GENE-040801-196  | crhbp             |  |
| ENSDARG0000038561  | 7.006851844 | -1.618328691 | 0.382271948 | -4.233448721 | 2.30135E-05 | 0.001485636 | klf6b             | ZDB-GENE-070912-633  | klf6b             |  |
| ENSDARG0000086529  | 3.637523651 | -6.579743563 | 1.554387212 | -4.233014472 | 2.3058E-05  | 0.001485636 | si:dkey-90l23.2   | ZDB-GENE-041008-200  | si:dkey-90l23.2   |  |
| ENSDARG0000002347  | 3.01121969  | -6.578380533 | 1.554106606 | -4.232901724 | 2.30695E-05 | 0.001485636 | cyp11a1           | ZDB-GENE-010306-1    | cyp11a1           |  |
| ENSDARG0000028027  | 190.5605171 | 0.870705204  | 0.206462769 | 4.217250441  | 2.47299E-05 | 0.001583928 | trim63a           | ZDB-GENE-040625-139  | trim63a           |  |
| ENSDARG0000079946  | 210.1461034 | 1.744573526  | 0.41368939  | 4.217109673  | 2.47454E-05 | 0.001583928 | sqlea             | ZDB-GENE-071004-98   | sqlea             |  |
| ENSDARG0000092999  | 6.772974892 | -2.072323647 | 0.491808671 | -4.213678551 | 2.51245E-05 | 0.00160335  | tnni4b.1          | ZDB-GENE-090312-198  | tnni4b.1          |  |
| ENSDARG0000015252  | 68.78240735 | -0.773537464 | 0.184137872 | -4.200860238 | 2.65903E-05 | 0.001687837 | st3gal3b          | ZDB-GENE-050411-13   | st3gal3b          |  |
| ENSDARG0000061143  | 51.58305062 | -0.632521563 | 0.150574853 | -4.200711805 | 2.66077E-05 | 0.001687837 | tapt1b            | ZDB-GENE-030131-4025 | tapt1b            |  |
| ENSDARG0000007693  | 252.6128494 | -0.713427733 | 0.169875212 | -4.199716517 | 2.67249E-05 | 0.001690213 | nfkbiab           | ZDB-GENE-030131-1819 | nfkbiab           |  |
| ENSDARG0000039117  | 467.0147218 | 0.429080695  | 0.102269752 | 4.195577749  | 2.72177E-05 | 0.001716254 | tefa              | ZDB-GENE-990415-264  | tefa              |  |
| ENSDARG0000091574  | 130.1900112 | -0.494550196 | 0.117940416 | -4.193220717 | 2.75022E-05 | 0.001729045 | suox              | ZDB-GENE-070718-3    | suox              |  |
| ENSDARG0000062601  | 5.403200956 | -2.66839999  | 0.636707285 | -4.190936794 | 2.77805E-05 | 0.001741377 | piwil2            | ZDB-GENE-060526-345  | piwil2            |  |
| ENSDARG0000037012  | 111.9606082 | -0.719883117 | 0.171849413 | -4.189034484 | 2.80144E-05 | 0.001750858 | slc3a2b           | ZDB-GENE-040122-2    | slc3a2b           |  |
| ENSDARG0000070178  | 1.427928611 | -4.751095374 | 1.135468517 | -4.18425989  | 2.86097E-05 | 0.001779889 | zp3d.2            | ZDB-GENE-030131-5363 | zp3d.2            |  |
| ENSDARG0000002271  | 163.1787692 | -0.668058742 | 0.159671234 | -4.183964298 | 2.86469E-05 | 0.001779889 | zfand5b           | ZDB-GENE-040426-875  | zfand5b           |  |

|                    |             |              |             |              |             |             |                     |                      |                   |  |
|--------------------|-------------|--------------|-------------|--------------|-------------|-------------|---------------------|----------------------|-------------------|--|
| ENSDARG0000009336  | 107.5583716 | 1.928634877  | 0.461629022 | 4.177889142  | 2.94227E-05 | 0.001822745 | mvda                | ZDB-GENE-041114-127  | mvda              |  |
| ENSDARG00000057128 | 299.9498687 | -0.474561517 | 0.11387593  | -4.16735581  | 3.08153E-05 | 0.001903453 | hadhaa              | ZDB-GENE-031222-5    | hadhaa            |  |
| ENSDARG00000044325 | 3.286386638 | -2.909568637 | 0.699052741 | -4.162158974 | 3.15253E-05 | 0.001941645 | zgc:193690          | ZDB-GENE-080721-12   | zgc:193690        |  |
| ENSDARG00000063538 | 246.3183619 | 0.446692958  | 0.107373995 | 4.160159611  | 3.18025E-05 | 0.001947487 | kalrnb              | ZDB-GENE-060421-7244 | kalrnb            |  |
| ENSDARG00000019417 | 59.63933557 | -1.134316939 | 0.272662556 | -4.160149297 | 3.1804E-05  | 0.001947487 | gadd45ga            | ZDB-GENE-040426-1882 | gadd45ga          |  |
| ENSDARG00000032079 | 14.08755243 | 1.263334894  | 0.303941886 | 4.15650147   | 3.23158E-05 | 0.001973127 | acsl3a              | ZDB-GENE-050420-181  | acsl3a            |  |
| ENSDARG00000105498 | 9.376054523 | -1.350694326 | 0.32505262  | -4.15530977  | 3.24847E-05 | 0.00197774  | TSC22D3 (1 of many) | ZDB-GENE-160114-28   | si:ch211-220e11.3 |  |
| ENSDARG00000056795 | 72.3316185  | -0.765375499 | 0.184442453 | -4.14967101  | 3.32953E-05 | 0.002021285 | serpine1            | ZDB-GENE-070912-60   | serpine1          |  |
| ENSDARG00000013453 | 4.703768791 | -2.567816401 | 0.618916064 | -4.148892798 | 3.34087E-05 | 0.002022373 | tdrd9               |                      |                   |  |
| ENSDARG00000078280 | 3.186396629 | -3.417895082 | 0.824261919 | -4.14661287  | 3.3743E-05  | 0.002036788 | nkx3-1              | ZDB-GENE-081104-238  | nkx3-1            |  |
| ENSDARG00000099395 | 24.30134421 | -0.852650512 | 0.205901582 | -4.141058579 | 3.45707E-05 | 0.00208082  | cables1             | ZDB-GENE-070912-509  | cables1           |  |
| ENSDARG00000007869 | 65.70277949 | -0.599950682 | 0.144931117 | -4.139557416 | 3.47977E-05 | 0.002088549 | ehd3                | ZDB-GENE-041014-352  | ehd3              |  |
| ENSDARG00000026376 | 741.2771352 | 0.970434938  | 0.234487425 | 4.138537232  | 3.49527E-05 | 0.00209193  | aco1                | ZDB-GENE-031118-76   | aco1              |  |
| ENSDARG00000044362 | 10.11453431 | -1.223300814 | 0.295845827 | -4.134926712 | 3.55068E-05 | 0.002119105 | unc119b             | ZDB-GENE-050201-2    | unc119b           |  |
| ENSDARG00000078419 | 74.29537924 | 0.788253801  | 0.190846446 | 4.130303795  | 3.62284E-05 | 0.0021561   | filip1a             | ZDB-GENE-030131-4110 | filip1a           |  |
| ENSDARG00000042063 | 3.018582718 | -5.080048426 | 1.232524252 | -4.121662043 | 3.76149E-05 | 0.002228765 | si:ch211-145c1.1    | ZDB-GENE-070912-81   | si:ch211-145c1.1  |  |
| ENSDARG00000094760 | 30.81847426 | 0.858254232  | 0.208244017 | 4.121387235  | 3.76598E-05 | 0.002228765 | si:dkey-125i10.3    | ZDB-GENE-060526-198  | si:dkey-125i10.3  |  |
| ENSDARG00000007836 | 644.5799523 | -0.497961378 | 0.120862983 | -4.120048727 | 3.78792E-05 | 0.002235508 | ctsla               | ZDB-GENE-030131-106  | ctsla             |  |
| ENSDARG00000028295 | 23.11905057 | -1.418439253 | 0.344527112 | -4.117061334 | 3.83734E-05 | 0.002258381 | mkrn4               | ZDB-GENE-030131-5954 | mkrn4             |  |
| ENSDARG00000086261 | 21.21834624 | -0.922531321 | 0.224199256 | -4.114783155 | 3.87544E-05 | 0.002274484 | fhdc4               | ZDB-GENE-131127-25   | fhdc4             |  |
| ENSDARG00000040452 | 115.9450559 | -0.737483024 | 0.179421662 | -4.110334372 | 3.95087E-05 | 0.002312348 | fam214a             | ZDB-GENE-050419-204  | fam214a           |  |
| ENSDARG00000079782 | 95.72279038 | -5.447941388 | 1.326240945 | -4.107806662 | 3.99434E-05 | 0.002331354 | myh7l               | ZDB-GENE-061027-393  | myh7l             |  |
| ENSDARG00000099959 | 1303.260766 | -1.488957362 | 0.362805606 | -4.104008694 | 4.06052E-05 | 0.002363469 | smyhc1              | ZDB-GENE-030131-271  | smyhc1            |  |
| ENSDARG00000035028 | 17.26097256 | -1.59834976  | 0.389527182 | -4.103307375 | 4.07286E-05 | 0.002364153 | lpcat4              | ZDB-GENE-030131-5777 | lpcat4            |  |
| ENSDARG00000101778 | 187.6060301 | -0.644914346 | 0.157260704 | -4.100924967 | 4.11502E-05 | 0.002382102 | ca5a                | ZDB-GENE-080220-57   | ca5a              |  |
| ENSDARG00000006422 | 50.23818782 | -0.738385002 | 0.180190357 | -4.097805314 | 4.17086E-05 | 0.002407847 | esy3                | ZDB-GENE-050809-35   | esy3              |  |
| ENSDARG00000099555 | 189.2022852 | -0.84413307  | 0.206035727 | -4.097022797 | 4.18498E-05 | 0.002409432 | foxo1a              | ZDB-GENE-061013-59   | foxo1a            |  |
| ENSDARG00000099554 | 93.01385298 | -0.48080934  | 0.117400159 | -4.095474362 | 4.21305E-05 | 0.002419021 | sec16b              | ZDB-GENE-050208-274  | sec16b            |  |
| ENSDARG00000077473 | 172.0126919 | -0.853145258 | 0.208534663 | -4.091143633 | 4.29251E-05 | 0.002449957 | mych                | ZDB-GENE-030219-51   | mych              |  |
| ENSDARG00000104172 | 587.6261748 | -1.820234066 | 0.444970252 | -4.090687088 | 4.30097E-05 | 0.002449957 | diabloa             | ZDB-GENE-040426-1303 | diabloa           |  |
| ENSDARG00000052734 | 3512.696898 | 0.893721878  | 0.218493578 | 4.09038053   | 4.30666E-05 | 0.002449957 | hmgcra              | ZDB-GENE-040401-2    | hmgcra            |  |
| ENSDARG00000039208 | 103.3672746 | -1.287246254 | 0.314727862 | -4.090029541 | 4.31318E-05 | 0.002449957 | nasp                | ZDB-GENE-030131-5511 | nasp              |  |
| ENSDARG00000017665 | 121.8976364 | -0.826397122 | 0.202127158 | -4.088501171 | 4.34169E-05 | 0.002459558 | snrkb               | ZDB-GENE-040426-1724 | snrkb             |  |
| ENSDARG00000091119 | 14.81946284 | -1.20633777  | 0.295239466 | -4.085963793 | 4.38942E-05 | 0.002477624 | fbxo40.2            | ZDB-GENE-120215-105  | fbxo40.2          |  |
| ENSDARG00000074635 | 514.4011324 | -0.80491829  | 0.19701518  | -4.085564832 | 4.39697E-05 | 0.002477624 | abca1a              | ZDB-GENE-031006-12   | abca1a            |  |
| ENSDARG00000086272 | 10.44936076 | -1.390432627 | 0.340570684 | -4.082655066 | 4.45241E-05 | 0.002502206 | si:dkey-4p15.5      | ZDB-GENE-121214-193  | si:dkey-4p15.5    |  |
| ENSDARG00000097979 | 11.25591245 | 1.211125904  | 0.297072181 | 4.07687418   | 4.56452E-05 | 0.002558424 | ugt1b3              | ZDB-GENE-080227-12   | ugt1b3            |  |
| ENSDARG00000060435 | 17.50891289 | -1.019769032 | 0.250252155 | -4.074966035 | 4.60211E-05 | 0.002572687 | bnip1               | ZDB-GENE-060503-81   | bnip1             |  |
| ENSDARG00000069100 | 2794.524127 | 0.457095771  | 0.112439527 | 4.065258756  | 4.79792E-05 | 0.002675093 | aldh9a1a.1          | ZDB-GENE-030131-1257 | aldh9a1a.1        |  |
| ENSDARG00000043816 | 2.855629885 | -3.799591321 | 0.935082364 | -4.063376091 | 4.8368E-05  | 0.002688796 | st6galnac1.2        | ZDB-GENE-041014-161  | st6galnac1.2      |  |
| ENSDARG00000037403 | 11.3164799  | -1.293621804 | 0.318403157 | -4.062842264 | 4.84788E-05 | 0.002688796 | si:dkey-4p15.3      | ZDB-GENE-121214-31   | si:dkey-4p15.3    |  |
| ENSDARG00000103811 | 355.2572026 | -0.371666496 | 0.091574228 | -4.058636424 | 4.93601E-05 | 0.002730528 | agla                | ZDB-GENE-071004-6    | agla              |  |
| ENSDARG00000012789 | 30.43651427 | -0.869663152 | 0.214361653 | -4.056990327 | 4.97091E-05 | 0.002742676 | plek2               | ZDB-GENE-080219-2    | plek2             |  |
| ENSDARG00000092966 | 0.941695911 | -3.86194052  | 0.952161682 | -4.055971366 | 4.99264E-05 | 0.002747507 | cyp11a2             | ZDB-GENE-130911-1    | cyp11a2           |  |
| ENSDARG00000060668 | 32.31206977 | 0.694138256  | 0.171167827 | 4.055307989  | 5.00683E-05 | 0.002748178 | tm4sf18             | ZDB-GENE-050208-690  | tm4sf18           |  |
| ENSDARG00000060215 | 60.86469117 | -0.635886298 | 0.157159698 | -4.04611556  | 5.20745E-05 | 0.002850913 | cep85               | ZDB-GENE-030131-1998 | cep85             |  |
| ENSDARG00000097082 | 25.23437228 | -0.988093288 | 0.24453788  | -4.040655322 | 5.3302E-05  | 0.002910594 | im:7152348          | ZDB-GENE-041111-308  | im:7152348        |  |
| ENSDARG00000102159 | 1.016868565 | 3.86592415   | 0.957041418 | 4.039453336  | 5.35759E-05 | 0.002918029 | ly6m6               | ZDB-GENE-131127-630  | ly6m6             |  |
| ENSDARG00000035741 | 423.1230525 | -0.387932213 | 0.09609773  | -4.036850933 | 5.41735E-05 | 0.002943008 | slc25a11            | ZDB-GENE-040625-79   | slc25a11          |  |



|                    |             |              |             |              |             |             |                   |                      |                   |  |
|--------------------|-------------|--------------|-------------|--------------|-------------|-------------|-------------------|----------------------|-------------------|--|
| ENSDARG00000038812 | 2.819066884 | -2.92116863  | 0.724138278 | -4.033992843 | 5.4837E-05  | 0.002971436 | e2f5              | ZDB-GENE-030828-3    | e2f5              |  |
| ENSDARG0000004823  | 2.032907526 | -3.955458139 | 0.980962418 | -4.032221895 | 5.5252E-05  | 0.002986285 | asz1              | ZDB-GENE-040426-988  | asz1              |  |
| ENSDARG00000058218 | 190.7421744 | 0.752665395  | 0.186852791 | 4.028119635  | 5.62247E-05 | 0.003031128 | fam151a           | ZDB-GENE-070705-105  | fam151a           |  |
| ENSDARG00000010332 | 5.223919382 | -7.052530846 | 1.751814921 | -4.025842435 | 5.67717E-05 | 0.003049623 | zgc:56231         | ZDB-GENE-040426-1914 | zgc:56231         |  |
| ENSDARG00000012539 | 164.8066131 | 0.880713652  | 0.218783958 | 4.025494649  | 5.68557E-05 | 0.003049623 | dnase1            | ZDB-GENE-040718-423  | dnase1            |  |
| ENSDARG00000077726 | 86.0476517  | -1.176768285 | 0.292452095 | -4.023798438 | 5.72669E-05 | 0.003063926 | nocta             | ZDB-GENE-050208-306  | nocta             |  |
| ENSDARG00000104470 | 89.02997551 | -0.720865813 | 0.17942059  | -4.017742959 | 5.87582E-05 | 0.003135796 | syngnr2b          | ZDB-GENE-070424-19   | syngnr2b          |  |
| ENSDARG00000063627 | 86.73842249 | -0.633509494 | 0.157855081 | -4.013234729 | 5.98923E-05 | 0.003188287 | bop1              | ZDB-GENE-030219-109  | bop1              |  |
| ENSDARG00000053966 | 1.355236307 | -3.822234822 | 0.953264737 | -4.009625737 | 6.08151E-05 | 0.003229295 | cyp17a2           | ZDB-GENE-100822-1    | cyp17a2           |  |
| ENSDARG00000077741 | 5.313428538 | -23.93450699 | 5.970646501 | -4.008696041 | 6.10549E-05 | 0.003233928 | zgc:175135        | ZDB-GENE-080214-1    | zgc:175135        |  |
| ENSDARG00000017982 | 92.65465618 | 1.138242995  | 0.284010413 | 4.007750928  | 6.12997E-05 | 0.003238796 | cyp39a1           | ZDB-GENE-041014-339  | cyp39a1           |  |
| ENSDARG00000074656 | 38.1249723  | -1.621797176 | 0.405267803 | -4.001791316 | 6.28647E-05 | 0.003313222 | ctss2.1           | ZDB-GENE-050522-559  | ctss2.1           |  |
| ENSDARG00000019763 | 48.95424928 | -1.770272025 | 0.442658217 | -3.99918483  | 6.3561E-05  | 0.003341607 | acp5a             | ZDB-GENE-040426-2864 | acp5a             |  |
| ENSDARG00000032708 | 23.94890379 | -0.889403549 | 0.222519854 | -3.996962662 | 6.41604E-05 | 0.003364769 | arl4cb            | ZDB-GENE-040426-2382 | arl4cb            |  |
| ENSDARG00000076313 | 399.6145748 | 0.934530109  | 0.233935053 | 3.994827185  | 6.47415E-05 | 0.003386858 | si:ch211-240 19.7 | ZDB-GENE-041210-329  | si:ch211-240 19.7 |  |
| ENSDARG00000011618 | 101.6020293 | -0.911422617 | 0.228323014 | -3.991812297 | 6.55703E-05 | 0.003419373 | slc26a2           | ZDB-GENE-030717-3    | slc26a2           |  |
| ENSDARG00000040890 | 333.4751576 | 1.460581797  | 0.365932665 | 3.991394961  | 6.56858E-05 | 0.003419373 | fdps              | ZDB-GENE-050506-78   | fdps              |  |
| ENSDARG00000009505 | 362.0432403 | -0.721401324 | 0.180774319 | -3.990618407 | 6.59012E-05 | 0.00342218  | prelid3b          | ZDB-GENE-031002-13   | prelid3b          |  |
| ENSDARG00000098746 | 132.7075347 | 0.973111181  | 0.243954754 | 3.988900259  | 6.63803E-05 | 0.003438631 | dhrs13l1          | ZDB-GENE-040426-1907 | dhrs13l1          |  |
| ENSDARG00000103991 | 142.7446227 | -0.550404063 | 0.138046536 | -3.987090725 | 6.68885E-05 | 0.003456502 | sec14l1           | ZDB-GENE-040426-801  | sec14l1           |  |
| ENSDARG00000078770 | 70.89850562 | 0.80050241   | 0.201282769 | 3.977004171  | 6.97889E-05 | 0.003587803 | si:ch73-21k16.5   | ZDB-GENE-030131-8374 | si:ch73-21k16.5   |  |
| ENSDARG00000088972 | 83.15259419 | 0.716304082  | 0.180137652 | 3.97642621   | 6.99587E-05 | 0.003587803 | si:dkey-238d18.4  | ZDB-GENE-131121-307  | si:dkey-238d18.4  |  |
| ENSDARG00000061221 | 2.250625296 | -3.674673937 | 0.92414734  | -3.976285791 | 7E-05       | 0.003587803 | si:ch211-157j23.2 | ZDB-GENE-030131-5686 | si:ch211-157j23.2 |  |
| ENSDARG00000012972 | 366.6342714 | -0.525328502 | 0.132127242 | -3.975923404 | 7.01067E-05 | 0.003587803 | cf1l1             | ZDB-GENE-040426-2770 | cf1l1             |  |
| ENSDARG00000042129 | 10.64015137 | -5.788613663 | 1.456767702 | -3.973601046 | 7.07941E-05 | 0.003612024 | zp3a.1            | ZDB-GENE-040727-1    | zp3a.1            |  |
| ENSDARG00000099510 | 271.4437161 | 0.395416305  | 0.099521495 | 3.973174905  | 7.09209E-05 | 0.003612024 | cnn3a             | ZDB-GENE-030131-5130 | cnn3a             |  |
| ENSDARG00000025375 | 1213.393134 | 0.67371645   | 0.169765045 | 3.968522798  | 7.23195E-05 | 0.003661667 | idh1              | ZDB-GENE-031006-1    | idh1              |  |
| ENSDARG00000109946 | 5.689131776 | 1.67151229   | 0.421212081 | 3.968338914  | 7.23754E-05 | 0.003661667 | BX005027.2        |                      |                   |  |
| ENSDARG00000043168 | 774.8796432 | 0.96679175   | 0.243634147 | 3.968211191  | 7.24141E-05 | 0.003661667 | CELA1 (1 of many) | ZDB-GENE-040801-186  | zgc:92511         |  |
| ENSDARG00000077326 | 207.7107366 | 0.566399593  | 0.14277877  | 3.96697348   | 7.27911E-05 | 0.00367074  | slc45a4           | ZDB-GENE-091230-5    | slc45a4           |  |
| ENSDARG00000012390 | 10.04868456 | -1.244786245 | 0.313825959 | -3.966485912 | 7.29401E-05 | 0.00367074  | kcnk5b            | ZDB-GENE-040426-1297 | kcnk5b            |  |
| ENSDARG00000035957 | 19.98072838 | -1.631180754 | 0.411920503 | -3.959940678 | 7.49684E-05 | 0.003763875 | gmnn              | ZDB-GENE-030429-30   | gmnn              |  |
| ENSDARG00000012388 | 317.3267137 | 0.795402442  | 0.20092734  | 3.958657101  | 7.53724E-05 | 0.003775211 | cox4i1l           | ZDB-GENE-130814-2    | cox4i1l           |  |
| ENSDARG00000060113 | 103.9515395 | 0.686974757  | 0.173594891 | 3.957344321  | 7.57876E-05 | 0.003787059 | znf395a           | ZDB-GENE-061215-52   | znf395a           |  |
| ENSDARG00000012718 | 2.594447728 | -3.32564311  | 0.840547941 | -3.95651806  | 7.60501E-05 | 0.003791234 | wee2              | ZDB-GENE-030131-5682 | wee2              |  |
| ENSDARG00000063229 | 158.5396273 | 0.535419852  | 0.135422776 | 3.953691304  | 7.69547E-05 | 0.003827321 | xpo1b             | ZDB-GENE-070530-6    | xpo1b             |  |
| ENSDARG00000039730 | 15806.89379 | 0.90390444   | 0.2286853   | 3.952612783  | 7.73025E-05 | 0.003835615 | zgc:112160        | ZDB-GENE-050417-229  | zgc:112160        |  |
| ENSDARG00000046124 | 36.36008832 | -0.752850742 | 0.19066957  | -3.948457755 | 7.86563E-05 | 0.00389367  | rab11fip1a        | ZDB-GENE-051113-116  | rab11fip1a        |  |
| ENSDARG00000040266 | 4.658260534 | -2.585339212 | 0.655101693 | -3.946470053 | 7.93118E-05 | 0.003916969 | sox19b            | ZDB-GENE-010111-1    | sox19b            |  |
| ENSDARG00000101014 | 12.36585207 | -1.335124434 | 0.338366201 | -3.94579728  | 7.95349E-05 | 0.00391885  | slco1f4           | ZDB-GENE-070112-2172 | slco1f4           |  |
| ENSDARG00000006112 | 108.4870623 | -0.525659328 | 0.133417469 | -3.939958778 | 8.14956E-05 | 0.004006143 | myof              | ZDB-GENE-040426-1138 | myof              |  |
| ENSDARG00000090900 | 109.6971046 | -1.338194695 | 0.33993145  | -3.936660446 | 8.26234E-05 | 0.00405218  | apnl              | ZDB-GENE-030131-8907 | apnl              |  |
| ENSDARG00000013775 | 66.52026203 | -0.770964672 | 0.195924861 | -3.935001762 | 8.31961E-05 | 0.004070844 | si:dkey-246g23.4  | ZDB-GENE-050419-234  | si:dkey-246g23.4  |  |
| ENSDARG00000000212 | 1252.390495 | -0.660397217 | 0.168027709 | -3.930287583 | 8.48443E-05 | 0.004141928 | krt97             | ZDB-GENE-040718-78   | krt97             |  |
| ENSDARG00000021339 | 29760.06605 | 0.771493576  | 0.19667546  | 3.922673293  | 8.75719E-05 | 0.004265253 | cpa5              | ZDB-GENE-020514-1    | cpa5              |  |
| ENSDARG00000069463 | 85.22846777 | 0.583420418  | 0.149020044 | 3.915046617  | 9.03867E-05 | 0.004392257 | alox12            | ZDB-GENE-030131-1452 | alox12            |  |
| ENSDARG00000096229 | 3.302355466 | -2.944084784 | 0.75245857  | -3.912620445 | 9.13E-05    | 0.004426482 | si:dkey-260c8.8   | ZDB-GENE-030131-5375 | si:dkey-260c8.8   |  |
| ENSDARG00000019815 | 668.8773369 | 0.435429421  | 0.111312275 | 3.911782598  | 9.16174E-05 | 0.004431189 | fn1a              | ZDB-GENE-000426-1    | fn1a              |  |
| ENSDARG00000078430 | 81.92267717 | -0.640810552 | 0.163852039 | -3.910909833 | 9.19491E-05 | 0.004431189 | tiam1a            | ZDB-GENE-080325-1    | tiam1a            |  |

|                    |             |              |             |              |             |             |                   |                      |                   |  |
|--------------------|-------------|--------------|-------------|--------------|-------------|-------------|-------------------|----------------------|-------------------|--|
| ENSDARG00000106212 | 45.93512782 | -1.257334359 | 0.32156591  | -3.910036231 | 9.22823E-05 | 0.004431189 | LO017965.1        |                      |                   |  |
| ENSDARG0000044094  | 355.4338067 | 0.605273487  | 0.154813574 | 3.909692613  | 9.24136E-05 | 0.004431189 | gfpt2             | ZDB-GENE-071113-1    | gfpt2             |  |
| ENSDARG00000102020 | 111.5294555 | -0.697867793 | 0.178500323 | -3.909616417 | 9.24428E-05 | 0.004431189 | pnpla3            | ZDB-GENE-040718-27   | pnpla3            |  |
| ENSDARG00000105644 | 352.9377829 | 0.746639277  | 0.191172444 | 3.905580018  | 9.39996E-05 | 0.004495644 | zgc:172079        | ZDB-GENE-080204-103  | zgc:172079        |  |
| ENSDARG00000007362 | 92.3331991  | 0.468881375  | 0.120086757 | 3.904521936  | 9.44118E-05 | 0.004505188 | sft2d1            | ZDB-GENE-040426-1350 | sft2d1            |  |
| ENSDARG00000041723 | 29.63809375 | -1.294770179 | 0.331791302 | -3.902363238 | 9.52581E-05 | 0.004535354 | zgc:55461         | ZDB-GENE-040426-2879 | zgc:55461         |  |
| ENSDARG00000043970 | 335.7961559 | -0.455919334 | 0.116929778 | -3.899086626 | 9.65562E-05 | 0.004586854 | lrpprc            | ZDB-GENE-030131-7887 | lrpprc            |  |
| ENSDARG00000002988 | 66.98560687 | -1.041131209 | 0.267170433 | -3.896880346 | 9.74397E-05 | 0.00461078  | tnnt2d            | ZDB-GENE-050626-97   | tnnt2d            |  |
| ENSDARG00000043003 | 301.5245937 | 0.5397595    | 0.138526587 | 3.896432533  | 9.762E-05   | 0.00461078  | pcyt2             | ZDB-GENE-041010-132  | pcyt2             |  |
| ENSDARG00000052705 | 30.60759956 | -2.012264321 | 0.516468126 | -3.896202337 | 9.77128E-05 | 0.00461078  | pkp1b             | ZDB-GENE-030131-417  | pkp1b             |  |
| ENSDARG00000045789 | 8.327489645 | -1.842123938 | 0.473723501 | -3.888605767 | 0.000100822 | 0.004746911 | srgap1b           | ZDB-GENE-041210-103  | srgap1b           |  |
| ENSDARG00000068951 | 4.905756175 | 3.083685361  | 0.793288927 | 3.887215941  | 0.000101401 | 0.004763577 | si:ch211-219a15.4 | ZDB-GENE-060503-308  | si:ch211-219a15.4 |  |
| ENSDARG00000087363 | 3.157158658 | -5.106963295 | 1.31775525  | -3.875502143 | 0.000106405 | 0.004987619 | si:dkeyp-46h3.6   | ZDB-GENE-060503-90   | si:dkeyp-46h3.6   |  |
| ENSDARG00000014565 | 1.722905832 | -4.10445916  | 1.060203054 | -3.871389677 | 0.000108217 | 0.005061337 | eif4e1b           | ZDB-GENE-980526-127  | eif4e1b           |  |
| ENSDARG00000001953 | 149.3934292 | 0.72047387   | 0.186168795 | 3.8700034    | 0.000108834 | 0.005078992 | pkfkb3            | ZDB-GENE-040426-2724 | pkfkb3            |  |
| ENSDARG00000030107 | 291.8482929 | -0.616518116 | 0.159367363 | -3.868534329 | 0.000109492 | 0.005098455 | si:ch211-207i1.2  | ZDB-GENE-041014-149  | si:ch211-207i1.2  |  |
| ENSDARG00000100265 | 3.786231527 | -2.713023657 | 0.702312989 | -3.862983739 | 0.00011201  | 0.005193473 | rhcgb             | ZDB-GENE-040426-2595 | rhcgb             |  |
| ENSDARG00000013522 | 2580.434149 | -1.570109315 | 0.406452611 | -3.862957875 | 0.000112022 | 0.005193473 | pck1              | ZDB-GENE-030909-11   | pck1              |  |
| ENSDARG00000038583 | 150.7398641 | -0.731503208 | 0.189440714 | -3.861383297 | 0.000112747 | 0.00521565  | abraa             | ZDB-GENE-120730-1    | abraa             |  |
| ENSDARG00000099111 | 336.2677583 | -0.793235748 | 0.205643101 | -3.857341895 | 0.000114627 | 0.005291062 | zgc:175280        | ZDB-GENE-080219-39   | zgc:175280        |  |
| ENSDARG00000102366 | 13.1090728  | -1.697962382 | 0.440842853 | -3.851627329 | 0.000117335 | 0.005394197 | micall2a          | ZDB-GENE-030131-5409 | micall2a          |  |
| ENSDARG00000088689 | 9.457821373 | -4.187072887 | 1.087112407 | -3.851554687 | 0.00011737  | 0.005394197 | si:ch211-201o1.1  | ZDB-GENE-120709-60   | si:ch211-201o1.1  |  |
| ENSDARG00000056084 | 8.615341331 | 1.330829475  | 0.345709771 | 3.849557018  | 0.000118332 | 0.005426607 | igsf21b           | ZDB-GENE-070424-59   | igsf21b           |  |
| ENSDARG00000101062 | 95.57808635 | 1.026684136  | 0.266777578 | 3.848464866  | 0.00011886  | 0.00543908  | fdft1             | ZDB-GENE-081104-242  | fdft1             |  |
| ENSDARG00000012903 | 584.2446861 | -1.383094828 | 0.359923592 | -3.842745678 | 0.000121666 | 0.005555447 | slc34a2a          | ZDB-GENE-000524-1    | slc34a2a          |  |
| ENSDARG00000076381 | 306.7560263 | -0.518640885 | 0.135041422 | -3.840605922 | 0.000122731 | 0.005585999 | slc25a1b          | ZDB-GENE-130114-1    | slc25a1b          |  |
| ENSDARG00000114503 | 28.36675513 | -0.918993383 | 0.239299744 | -3.84034419  | 0.000122862 | 0.005585999 | phtf2             | ZDB-GENE-040711-4    | phtf2             |  |
| ENSDARG00000077967 | 64.64694411 | -0.475439016 | 0.123838199 | -3.839195188 | 0.000123438 | 0.005600186 | si:ch211-140m22.7 | ZDB-GENE-070912-73   | si:ch211-140m22.7 |  |
| ENSDARG00000090428 | 36745.48595 | 0.777024734  | 0.20248527  | 3.837438308  | 0.000124324 | 0.005628338 | ctrb1             | ZDB-GENE-030131-1171 | ctrb1             |  |
| ENSDARG00000076093 | 4.300911949 | -1.968123891 | 0.513198539 | -3.835014601 | 0.000125557 | 0.00567201  | fr76              | ZDB-GENE-090508-15   | fr76              |  |
| ENSDARG00000022615 | 167.3912952 | -1.007760971 | 0.263017981 | -3.8315288   | 0.000127349 | 0.005740751 | si:ch211-241e1.3  | ZDB-GENE-030131-230  | si:ch211-241e1.3  |  |
| ENSDARG00000043722 | 2499.53724  | 0.942666245  | 0.246494303 | 3.824292217  | 0.000131148 | 0.005891913 | cpa4              | ZDB-GENE-040704-61   | cpa4              |  |
| ENSDARG00000076592 | 112.6757034 | -0.501764256 | 0.131211605 | -3.824084441 | 0.000131259 | 0.005891913 | man1b1b           | ZDB-GENE-070705-482  | man1b1b           |  |
| ENSDARG00000055493 | 230.8677816 | 0.379992207  | 0.099390618 | 3.823220076  | 0.00013172  | 0.005900114 | hic1              | ZDB-GENE-040713-2    | hic1              |  |
| ENSDARG00000091418 | 184.6686722 | 0.354272582  | 0.092734918 | 3.820271715  | 0.000133305 | 0.005958497 | snx17             | ZDB-GENE-030131-9475 | snx17             |  |
| ENSDARG00000074163 | 3.299192559 | -2.796948302 | 0.732550187 | -3.818097862 | 0.000134485 | 0.005998579 | zgc:162879        | ZDB-GENE-070424-92   | zgc:162879        |  |
| ENSDARG00000098375 | 267.3144557 | -0.461597187 | 0.121066022 | -3.812772394 | 0.000137417 | 0.006106031 | polr1a            | ZDB-GENE-030131-5286 | polr1a            |  |
| ENSDARG00000039211 | 1714.649052 | -0.624040949 | 0.163675295 | -3.812676488 | 0.00013747  | 0.006106031 | zgc:77439         | ZDB-GENE-031010-24   | zgc:77439         |  |
| ENSDARG00000036967 | 78.78671247 | -0.616736436 | 0.16188078  | -3.809818791 | 0.000139069 | 0.006164118 | smox              | ZDB-GENE-031201-3    | smox              |  |
| ENSDARG00000096603 | 5.599978172 | -2.361357718 | 0.620410426 | -3.806121915 | 0.000141163 | 0.006243876 | bmb               | ZDB-GENE-030131-5577 | bmb               |  |
| ENSDARG00000104409 | 26.8677962  | -0.737468474 | 0.193791286 | -3.805477994 | 0.000141531 | 0.006247102 | tnk2b             | ZDB-GENE-110411-165  | tnk2b             |  |
| ENSDARG00000069790 | 13.36774316 | -1.412406421 | 0.371203993 | -3.804933268 | 0.000141842 | 0.006247849 | dynll2a           | ZDB-GENE-030828-11   | dynll2a           |  |
| ENSDARG00000004745 | 93.97652074 | -0.585227582 | 0.153848697 | -3.80391639  | 0.000142426 | 0.006260551 | lmb1l             | ZDB-GENE-030131-9906 | lmb1l             |  |
| ENSDARG00000074301 | 344.4501771 | 0.630302938  | 0.165748591 | 3.802764987  | 0.00014309  | 0.006276707 | cth               | ZDB-GENE-030131-774  | cth               |  |
| ENSDARG00000052433 | 0.872496317 | -3.292342509 | 0.86606006  | -3.801517542 | 0.000143813 | 0.006284649 | inha              | ZDB-GENE-060503-554  | inha              |  |
| ENSDARG00000042866 | 48.88663001 | -0.723692127 | 0.190373743 | -3.801428257 | 0.000143864 | 0.006284649 | cx35.4            | ZDB-GENE-050417-174  | cx35.4            |  |
| ENSDARG00000102720 | 168.3185994 | 1.024371855  | 0.269695772 | 3.79824959   | 0.000145722 | 0.00635268  | zgc:123284        | ZDB-GENE-051113-92   | zgc:123284        |  |
| ENSDARG00000099801 | 2.66403747  | -3.332806616 | 0.878552893 | -3.793518458 | 0.000148528 | 0.006447319 | topaz1            | ZDB-GENE-130117-1    | topaz1            |  |
| ENSDARG00000004094 | 392.263554  | 0.902749018  | 0.23799027  | 3.793218186  | 0.000148707 | 0.006447319 | acsbg2            | ZDB-GENE-030131-7099 | acsbg2            |  |

|                     |             |              |             |              |             |             |                   |                      |                   |  |
|---------------------|-------------|--------------|-------------|--------------|-------------|-------------|-------------------|----------------------|-------------------|--|
| ENSDARG00000103428  | 398.4902431 | -0.50532474  | 0.133228654 | -3.792913333 | 0.00014889  | 0.006447319 | ogdhb             | ZDB-GENE-090311-8    | ogdhb             |  |
| ENSDARG00000101892  | 30.955085   | -0.764663191 | 0.201622569 | -3.792547597 | 0.00014911  | 0.006447319 | ino80e            | ZDB-GENE-040426-1818 | ino80e            |  |
| ENSDARG00000091558  | 3.905836102 | -3.861475666 | 1.018511229 | -3.791294151 | 0.000149864 | 0.006462648 | si:ch211-251f6.7  | ZDB-GENE-091113-57   | si:ch211-251f6.7  |  |
| ENSDARG00000074624  | 343.0883167 | 0.262801736  | 0.069332645 | 3.790447316  | 0.000150376 | 0.006462648 | si:ch211-198a12.6 | ZDB-GENE-030131-1683 | si:ch211-198a12.6 |  |
| ENSDARG00000087330  | 33.02536412 | -0.660743913 | 0.174322772 | -3.790347665 | 0.000150437 | 0.006462648 | maza              | ZDB-GENE-110603-4    | maza              |  |
| ENSDARG00000007276  | 18668.078   | 0.825850296  | 0.217905962 | 3.789938973  | 0.000150684 | 0.006462648 | ela3l             | ZDB-GENE-060710-2    | ela3l             |  |
| ENSDARG00000092281  | 67.47202939 | 0.603665679  | 0.159328401 | 3.788814005  | 0.000151368 | 0.00647128  | flnb              | ZDB-GENE-041026-1    | flnb              |  |
| ENSDARG00000046012  | 157.4170944 | -0.700781707 | 0.184970977 | -3.78860359  | 0.000151496 | 0.00647128  | slc47a1           | ZDB-GENE-050327-20   | slc47a1           |  |
| ENSDARG00000101156  | 1.153323032 | -3.545584278 | 0.936544037 | -3.785816937 | 0.000153204 | 0.00651848  | slco1f2           | ZDB-GENE-080305-3    | slco1f2           |  |
| ENSDARG00000029689  | 6.879815536 | 1.761233026  | 0.465221208 | 3.785796945  | 0.000153217 | 0.00651848  | tkta              | ZDB-GENE-130530-578  | tkta              |  |
| ENSDARG00000039381  | 4.57995     | -1.980708613 | 0.523613135 | -3.782771057 | 0.000155092 | 0.006574974 | ch25hl1.1         | ZDB-GENE-030131-8617 | ch25hl1.1         |  |
| ENSDARG00000054288  | 69.45280502 | -0.705810911 | 0.186591475 | -3.782653583 | 0.000155165 | 0.006574974 | zgc:63972         | ZDB-GENE-040426-1320 | zgc:63972         |  |
| ENSDARG00000094112  | 79.60357397 | -0.544202357 | 0.144008333 | -3.778964349 | 0.000157482 | 0.006648249 | slc22a21          | ZDB-GENE-091118-62   | slc22a21          |  |
| ENSDARG00000019541  | 697.8367496 | -0.461389653 | 0.122096257 | -3.778900885 | 0.000157522 | 0.006648249 | gpt2l             | ZDB-GENE-050302-11   | gpt2l             |  |
| ENSDARG00000023002  | 7.775266181 | -1.576680878 | 0.417586287 | -3.775700797 | 0.000159558 | 0.006720804 | dtl               | ZDB-GENE-020419-34   | dtl               |  |
| ENSDARG00000030087  | 470.5393524 | -0.608704459 | 0.161330084 | -3.77303752  | 0.000161272 | 0.006779505 | nfbkib            | ZDB-GENE-070705-529  | nfbkib            |  |
| ENSDARG00000042993  | 38351.6822  | 0.74816911   | 0.198465788 | 3.769763627  | 0.000163402 | 0.006853109 | prss1             | ZDB-GENE-010131-7    | prss1             |  |
| ENSDARG00000012485  | 16.12274783 | -1.499232725 | 0.397742493 | -3.769355177 | 0.00016367  | 0.006853109 | aurka             | ZDB-GENE-040801-161  | aurka             |  |
| ENSDARG000000102636 | 2.630149099 | -2.544138798 | 0.676086841 | -3.763035519 | 0.000167863 | 0.007014834 | trmt9b            | ZDB-GENE-030131-4851 | trmt9b            |  |
| ENSDARG00000006546  | 224.2435263 | 0.753650967  | 0.200642975 | 3.756179194  | 0.000172527 | 0.007195538 | ak4               | ZDB-GENE-040426-2505 | ak4               |  |
| ENSDARG00000079274  | 41462.52624 | 0.805011332  | 0.214366487 | 3.755304028  | 0.000173131 | 0.007206543 | prss59.1          | ZDB-GENE-030131-1173 | prss59.1          |  |
| ENSDARG00000054510  | 66.80564781 | -0.746546644 | 0.198879793 | -3.753758154 | 0.000174203 | 0.007236937 | adrb2b            | ZDB-GENE-070410-32   | adrb2b            |  |
| ENSDARG00000008133  | 18.0798021  | -1.022558798 | 0.272500486 | -3.752502654 | 0.000175078 | 0.007259055 | foxl1             | ZDB-GENE-040426-1181 | foxl1             |  |
| ENSDARG00000044204  | 408.5630239 | 0.824632204  | 0.219798302 | 3.751767863  | 0.000175592 | 0.007266148 | endou             | ZDB-GENE-070112-2012 | endou             |  |
| ENSDARG00000043154  | 277.2062963 | -0.604787101 | 0.161370397 | -3.747819385 | 0.000178379 | 0.007367072 | ucp2              | ZDB-GENE-990708-8    | ucp2              |  |
| ENSDARG00000040081  | 2.146549227 | -3.753619622 | 1.002181206 | -3.745450023 | 0.000180071 | 0.007413641 | zp3d.1            | ZDB-GENE-030131-5827 | zp3d.1            |  |
| ENSDARG00000060397  | 96.3304517  | -0.456758455 | 0.121956362 | -3.745261415 | 0.000180206 | 0.007413641 | hhip              | ZDB-GENE-030131-4827 | hhip              |  |
| ENSDARG00000003281  | 49.75440558 | -0.945620595 | 0.25252255  | -3.744697627 | 0.000180611 | 0.007415908 | pik3ip1           | ZDB-GENE-031030-14   | pik3ip1           |  |
| ENSDARG00000073786  | 141.7885006 | 0.577176308  | 0.154183494 | 3.743437722  | 0.00018152  | 0.007438793 | cmb1              | ZDB-GENE-071004-21   | cmb1              |  |
| ENSDARG00000016177  | 71.85271595 | -0.693514981 | 0.18553882  | -3.737843012 | 0.000185606 | 0.007591563 | eif4enif1         | ZDB-GENE-050320-113  | eif4enif1         |  |
| ENSDARG00000025671  | 37.36193141 | 0.809160857  | 0.216620736 | 3.735380428  | 0.000187432 | 0.007651472 | grm6b             | ZDB-GENE-021120-2    | grm6b             |  |
| ENSDARG00000040002  | 81.32745143 | -0.780314224 | 0.209023792 | -3.733135915 | 0.00018911  | 0.007698093 | pnpla7b           | ZDB-GENE-050309-66   | pnpla7b           |  |
| ENSDARG00000007099  | 37.41527642 | -0.930562077 | 0.249303684 | -3.732644717 | 0.00018948  | 0.007698093 | cx43.4            | ZDB-GENE-990415-38   | cx43.4            |  |
| ENSDARG00000056719  | 801.3403064 | -0.698316129 | 0.187104411 | -3.732226968 | 0.000189794 | 0.007698093 | slc6a19b          | ZDB-GENE-030131-4755 | slc6a19b          |  |
| ENSDARG00000043566  | 9.744328656 | -1.12178182  | 0.30062763  | -3.731466139 | 0.000190369 | 0.007698093 | nepro             | ZDB-GENE-030131-5651 | nepro             |  |
| ENSDARG00000073742  | 28764.19471 | 0.731364934  | 0.196000862 | 3.731437332  | 0.00019039  | 0.007698093 | prss59.2          | ZDB-GENE-110408-10   | prss59.2          |  |
| ENSDARG00000104949  | 117.3422778 | -0.827587919 | 0.221838507 | -3.730587316 | 0.000191034 | 0.007709401 | slc27a1b          | ZDB-GENE-061013-672  | slc27a1b          |  |
| ENSDARG00000003421  | 91.48461009 | -0.505466008 | 0.135627787 | -3.726861735 | 0.000193879 | 0.007809333 | igf2bp2a          | ZDB-GENE-070912-44   | igf2bp2a          |  |
| ENSDARG00000020328  | 419.381769  | -0.540562238 | 0.145135652 | -3.724531032 | 0.000195679 | 0.007866875 | plekha6           | ZDB-GENE-140106-14   | plekha6           |  |
| ENSDARG00000036414  | 495.7396749 | -0.553119967 | 0.148626559 | -3.721541904 | 0.00019801  | 0.007931822 | si:ch73-335l21.1  | ZDB-GENE-130530-591  | si:ch73-335l21.1  |  |
| ENSDARG00000079637  | 100.3848599 | -0.858317093 | 0.230637402 | -3.721500009 | 0.000198043 | 0.007931822 | alpk2             | ZDB-GENE-030131-1868 | alpk2             |  |
| ENSDARG00000055292  | 98.17381908 | -0.528800087 | 0.142116694 | -3.720886486 | 0.000198525 | 0.007936117 | atg9b             | ZDB-GENE-091111-3    | atg9b             |  |
| ENSDARG00000032206  | 161.7396735 | 0.689692176  | 0.185700727 | 3.713998244  | 0.00020401  | 0.008140046 | cthl              | ZDB-GENE-040905-3    | cthl              |  |
| ENSDARG00000010658  | 287.5126293 | 0.864015105  | 0.232785945 | 3.711629167  | 0.00020593  | 0.008201182 | insig1            | ZDB-GENE-030131-6121 | insig1            |  |
| ENSDARG00000069031  | 8.368760124 | 1.368629963  | 0.369060655 | 3.708414713  | 0.000208561 | 0.008288987 | plac8l1           | ZDB-GENE-091204-165  | plac8l1           |  |
| ENSDARG00000012369  | 30.7987711  | -0.990165436 | 0.267036136 | -3.707982931 | 0.000208917 | 0.008288987 | rdh10b            | ZDB-GENE-030909-7    | rdh10b            |  |
| ENSDARG00000102899  | 3.39343095  | 2.920502326  | 0.788688794 | 3.702984433  | 0.000213078 | 0.008438286 | cremb             | ZDB-GENE-050417-150  | cremb             |  |
| ENSDARG00000076005  | 95.72657106 | 0.402331416  | 0.10872269  | 3.700528513  | 0.000215151 | 0.008489001 | piezo2a.2         | ZDB-GENE-131119-76   | piezo2a.2         |  |
| ENSDARG00000040190  | 399.2388644 | 0.666417423  | 0.180093384 | 3.700399253  | 0.000215261 | 0.008489001 | qdptra            | ZDB-GENE-070705-197  | qdptra            |  |

|                     |             |              |             |              |             |             |                 |                      |                 |  |
|---------------------|-------------|--------------|-------------|--------------|-------------|-------------|-----------------|----------------------|-----------------|--|
| ENSDARG00000063917  | 17046.20636 | -0.381397117 | 0.1030856   | -3.699809837 | 0.000215761 | 0.008489001 | mt-nd4          | ZDB-GENE-011205-10   | mt-nd4          |  |
| ENSDARG00000010130  | 303.1599092 | 0.575271837  | 0.155496759 | 3.699574443  | 0.000215961 | 0.008489001 | smpdl3b         | ZDB-GENE-041008-132  | smpdl3b         |  |
| ENSDARG00000003210  | 2.070453518 | -3.17684462  | 0.859462958 | -3.696313598 | 0.000218753 | 0.008582804 | si:ch73-86n2.1  | ZDB-GENE-091204-400  | si:ch73-86n2.1  |  |
| ENSDARG00000056913  | 735.2497629 | 0.379891918  | 0.102995238 | 3.688441582  | 0.000225632 | 0.008826578 | pcolcea         | ZDB-GENE-041014-370  | pcolcea         |  |
| ENSDARG00000002745  | 1090.714489 | 0.332296187  | 0.090104237 | 3.687908569  | 0.000226105 | 0.008826578 | tdh             | ZDB-GENE-040426-2379 | tdh             |  |
| ENSDARG00000006220  | 1377.352279 | 0.579516862  | 0.157145019 | 3.68778384   | 0.000226216 | 0.008826578 | ugt1a7          | ZDB-GENE-071004-5    | ugt1a2          |  |
| ENSDARG00000006220  | 1377.352279 | 0.579516862  | 0.157145019 | 3.68778384   | 0.000226216 | 0.008826578 | ugt1a7          | ZDB-GENE-071004-4    | ugt1a1          |  |
| ENSDARG00000006220  | 1377.352279 | 0.579516862  | 0.157145019 | 3.68778384   | 0.000226216 | 0.008826578 | ugt1a7          | ZDB-GENE-080227-5    | ugt1a6          |  |
| ENSDARG00000006220  | 1377.352279 | 0.579516862  | 0.157145019 | 3.68778384   | 0.000226216 | 0.008826578 | ugt1a7          | ZDB-GENE-080227-6    | ugt1a7          |  |
| ENSDARG00000074457  | 89.59010485 | 1.017700676  | 0.276277519 | 3.683617395  | 0.000229947 | 0.008951317 | si:dkey-96f10.1 | ZDB-GENE-090312-154  | si:dkey-96f10.1 |  |
| ENSDARG00000021372  | 607.5949444 | -0.549620411 | 0.149220623 | -3.683273809 | 0.000230258 | 0.008951317 | tob1b           | ZDB-GENE-040426-2151 | tob1b           |  |
| ENSDARG00000077513  | 18.18875968 | 0.832267798  | 0.226094211 | 3.681066374  | 0.000232261 | 0.008997638 | ppp1r3da        | ZDB-GENE-080204-75   | ppp1r3da        |  |
| ENSDARG000000030872 | 116.6550391 | -1.156334809 | 0.314133942 | -3.681024726 | 0.000232298 | 0.008997638 | cetp            | ZDB-GENE-041114-54   | cetp            |  |
| ENSDARG00000089181  | 1.199671608 | -4.219483902 | 1.14652738  | -3.680229514 | 0.000233024 | 0.009009274 | adad1           | ZDB-GENE-030131-6285 | adad1           |  |
| ENSDARG00000024904  | 11.46726433 | -1.626990684 | 0.442302981 | -3.678452898 | 0.000234653 | 0.009055726 | stil            | ZDB-GENE-020419-39   | stil            |  |
| ENSDARG00000057652  | 482.4642488 | -0.503126303 | 0.136882448 | -3.675608614 | 0.000237283 | 0.009140575 | dbpb            | ZDB-GENE-100922-6    | dbpb            |  |
| ENSDARG00000055395  | 30.12858386 | 0.899332354  | 0.244777547 | 3.674080267  | 0.000238708 | 0.009162148 | foxq1b          | ZDB-GENE-040426-2090 | foxq1b          |  |
| ENSDARG00000076473  | 20.07099878 | -0.889278777 | 0.242069721 | -3.673647298 | 0.000239113 | 0.009162148 | trim37          | ZDB-GENE-030131-2957 | trim37          |  |
| ENSDARG00000059824  | 39.90990609 | -1.735340953 | 0.472379293 | -3.673617742 | 0.00023914  | 0.009162148 | soat2           | ZDB-GENE-061013-742  | soat2           |  |
| ENSDARG00000071541  | 1.210509607 | -4.373829434 | 1.191043667 | -3.672266229 | 0.000240409 | 0.009194127 | si:dkey-42i9.8  | ZDB-GENE-050208-412  | si:dkey-42i9.8  |  |
| ENSDARG00000040874  | 408.5400312 | 0.298938178  | 0.081464242 | 3.669563107  | 0.000242965 | 0.009275148 | add3a           | ZDB-GENE-030131-2721 | add3a           |  |
| ENSDARG00000009942  | 18.60678543 | -1.273866829 | 0.347360151 | -3.667279698 | 0.000245145 | 0.009341508 | cdc6            | ZDB-GENE-050506-131  | cdc6            |  |
| ENSDARG00000006601  | 38.04636147 | 0.623016073  | 0.169913663 | 3.666662588  | 0.000245737 | 0.009347259 | kaznb           | ZDB-GENE-061215-31   | kaznb           |  |
| ENSDARG00000027609  | 225.6530309 | -0.509596329 | 0.139089187 | -3.663809814 | 0.000248491 | 0.009409665 | hpn             | ZDB-GENE-141212-373  | hpn             |  |
| ENSDARG00000051854  | 15.15447836 | -1.564721908 | 0.427076753 | -3.663795547 | 0.000248505 | 0.009409665 | cdt1            | ZDB-GENE-070111-1    | cdt1            |  |
| ENSDARG00000003142  | 49.08778013 | -0.770700791 | 0.210367933 | -3.663584937 | 0.00024871  | 0.009409665 | dachc           | ZDB-GENE-020402-5    | dachc           |  |
| ENSDARG00000016494  | 219.9645378 | -0.647889403 | 0.176892705 | -3.662612338 | 0.000249656 | 0.009428638 | ddc             | ZDB-GENE-040426-2656 | ddc             |  |
| ENSDARG00000030915  | 5112.294186 | 0.74967842   | 0.204786582 | 3.660779011  | 0.00025145  | 0.00947947  | cpa1            | ZDB-GENE-050522-438  | cpa1            |  |
| ENSDARG00000087873  | 49.56970246 | 0.766841348  | 0.209567643 | 3.659159106  | 0.000253044 | 0.009521538 | eevs            | ZDB-GENE-131121-365  | eevs            |  |
| ENSDARG00000052244  | 402.8425494 | 0.265858488  | 0.072664066 | 3.658733972  | 0.000253464 | 0.009521538 | zgc:158564      | ZDB-GENE-070112-1662 | zgc:158564      |  |
| ENSDARG00000008140  | 7.687563245 | 1.422626348  | 0.388918354 | 3.657904885  | 0.000254285 | 0.009535476 | kcnab1a         | ZDB-GENE-050327-79   | kcnab1a         |  |
| ENSDARG00000033832  | 964.6956993 | -0.972140051 | 0.265994846 | -3.654732664 | 0.00025745  | 0.009637094 | ampd1           | ZDB-GENE-040426-1906 | ampd1           |  |
| ENSDARG00000031768  | 75.12804862 | 0.593780152  | 0.162649914 | 3.650663795  | 0.000261563 | 0.0097738   | rora            | ZDB-GENE-060306-2    | rora            |  |
| ENSDARG00000062646  | 304.5455934 | 0.409820859  | 0.112318984 | 3.648723006  | 0.000263547 | 0.009798799 | tet3            | ZDB-GENE-060526-109  | tet3            |  |
| ENSDARG00000005840  | 343.5433007 | -0.417332931 | 0.114384406 | -3.648512475 | 0.000263763 | 0.009798799 | got2b           | ZDB-GENE-030131-7917 | got2b           |  |
| ENSDARG00000028976  | 12.59791764 | -1.171823648 | 0.32123569  | -3.647862568 | 0.000264431 | 0.009798799 | pus3            | ZDB-GENE-030131-9433 | pus3            |  |
| ENSDARG00000061120  | 2356.158144 | -0.660484401 | 0.181073502 | -3.64760384  | 0.000264697 | 0.009798799 | slc43a2b        | ZDB-GENE-041212-6    | slc43a2b        |  |
| ENSDARG00000027734  | 240.2951308 | 0.29841761   | 0.081817723 | 3.647346799  | 0.000264962 | 0.009798799 | srsf5b          | ZDB-GENE-040718-354  | srsf5b          |  |
| ENSDARG00000019236  | 137.1185374 | 0.574246323  | 0.157444098 | 3.647302944  | 0.000265007 | 0.009798799 | gsr             | ZDB-GENE-050522-116  | gsr             |  |
| ENSDARG00000074410  | 21.98931576 | -0.711473045 | 0.195388079 | -3.641332929 | 0.00027123  | 0.010011415 | brip1           | ZDB-GENE-081107-11   | brip1           |  |
| ENSDARG00000006508  | 48.35903072 | -0.775136526 | 0.213007252 | -3.639014725 | 0.000273683 | 0.010082236 | pip5k1bb        | ZDB-GENE-040912-141  | pip5k1bb        |  |
| ENSDARG00000044601  | 1236.869207 | -0.320884373 | 0.088188427 | -3.638622236 | 0.000274101 | 0.010082236 | rtn4a           | ZDB-GENE-030710-1    | rtn4a           |  |
| ENSDARG00000075491  | 24.75439536 | -0.921042243 | 0.253195854 | -3.637667167 | 0.000275119 | 0.010102146 | si:ch211-26b3.4 | ZDB-GENE-081104-60   | si:ch211-26b3.4 |  |
| ENSDARG00000032197  | 30.44438066 | -0.734034535 | 0.20182885  | -3.636915808 | 0.000275922 | 0.010114419 | kif12b          | ZDB-GENE-071004-22   | kif12b          |  |
| ENSDARG00000014577  | 87.40177329 | -0.563895888 | 0.155193929 | -3.633491936 | 0.000279611 | 0.010231645 | rhpn2           | ZDB-GENE-030131-9927 | rhpn2           |  |
| ENSDARG00000002986  | 313.0135975 | 0.722545493  | 0.198882693 | 3.633023476  | 0.00028012  | 0.010232573 | gda             | ZDB-GENE-050522-434  | gda             |  |
| ENSDARG00000034270  | 941.4814676 | -0.366876262 | 0.101080853 | -3.629532701 | 0.000283935 | 0.010354089 | ogdha           | ZDB-GENE-030131-2143 | ogdha           |  |
| ENSDARG00000101251  | 1274.265908 | -0.494256437 | 0.136251023 | -3.62754294  | 0.000286131 | 0.010416257 | ldha            | ZDB-GENE-991026-5    | ldha            |  |
| ENSDARG00000054363  | 85.46834733 | -0.468641352 | 0.129255505 | -3.625697435 | 0.000288183 | 0.010472942 | si:zfos-464b6.2 | ZDB-GENE-030131-5337 | si:zfos-464b6.2 |  |

|                    |             |              |             |              |             |             |                  |                      |                   |  |
|--------------------|-------------|--------------|-------------|--------------|-------------|-------------|------------------|----------------------|-------------------|--|
| ENSDARG00000079011 | 269.0853137 | -0.753371103 | 0.207862439 | -3.624373445 | 0.000289663 | 0.010508709 | col17a1b         | ZDB-GENE-030131-7145 | col17a1b          |  |
| ENSDARG00000025012 | 4.586956747 | -1.9614126   | 0.541272947 | -3.623703368 | 0.000290415 | 0.010517975 | tpi1a            | ZDB-GENE-020416-3    | tpi1a             |  |
| ENSDARG00000020136 | 14.93633033 | -0.943823273 | 0.260528525 | -3.622725274 | 0.000291515 | 0.010539823 | ptges            | ZDB-GENE-050407-2    | ptges             |  |
| ENSDARG00000038476 | 19.43973892 | -0.796105442 | 0.219836093 | -3.621359127 | 0.000293059 | 0.010568293 | si:dkeyp-68b7.7  | ZDB-GENE-070912-672  | si:dkeyp-68b7.7   |  |
| ENSDARG00000098024 | 967.5811268 | -0.517411022 | 0.14288597  | -3.621146438 | 0.0002933   | 0.010568293 | si:dkey-262k9.2  | ZDB-GENE-131121-282  | si:dkey-262k9.2   |  |
| ENSDARG00000090386 | 30.17608366 | -0.706219744 | 0.195157376 | -3.618719192 | 0.000296065 | 0.010649783 | cd3eap           | ZDB-GENE-101202-2    | cd3eap            |  |
| ENSDARG00000028517 | 54.84244944 | -0.824306409 | 0.228138987 | -3.613176416 | 0.000302469 | 0.010861704 | hbp1             | ZDB-GENE-050522-414  | hbp1              |  |
| ENSDARG00000003706 | 4.485978009 | -3.448849776 | 0.955284166 | -3.610286758 | 0.000305859 | 0.010957031 | ryr2b            | ZDB-GENE-061226-3    | ryr2b             |  |
| ENSDARG00000045442 | 28341.73881 | 0.743254272  | 0.205885709 | 3.610033332  | 0.000306158 | 0.010957031 | cpb1             | ZDB-GENE-030131-1132 | cpb1              |  |
| ENSDARG00000068465 | 3.085370513 | -4.813097544 | 1.333714251 | -3.608792168 | 0.000307626 | 0.010991013 | zgc:136254       | ZDB-GENE-060421-3062 | zgc:136254        |  |
| ENSDARG00000041797 | 1278.06918  | -0.478651759 | 0.132877108 | -3.602213848 | 0.000315519 | 0.011254029 | cx28.9           | ZDB-GENE-041114-200  | cx28.9            |  |
| ENSDARG00000051711 | 13.36204825 | 1.139008591  | 0.316253642 | 3.60156672   | 0.000316305 | 0.011263124 | CR339041.2       |                      |                   |  |
| ENSDARG00000079166 | 2827.654713 | -0.892981017 | 0.248473924 | -3.593862094 | 0.000325812 | 0.011582191 | ace              | ZDB-GENE-030131-1826 | ace               |  |
| ENSDARG00000036214 | 1.847073678 | -2.889342893 | 0.804582284 | -3.591109264 | 0.000329274 | 0.011685626 | dazl             | ZDB-GENE-000405-6    | dazl              |  |
| ENSDARG00000056339 | 2.094263541 | -2.466499191 | 0.687248418 | -3.588948516 | 0.000332014 | 0.011761068 | stk31            | ZDB-GENE-140106-59   | stk31             |  |
| ENSDARG00000098949 | 17.89628852 | -3.135373864 | 0.873713667 | -3.58855994  | 0.00033251  | 0.011761068 | mshna            | ZDB-GENE-120727-9    | mshna             |  |
| ENSDARG00000017388 | 194.9213588 | 0.60759199   | 0.169560624 | 3.583331892  | 0.000339239 | 0.011979099 | gstt1b           | ZDB-GENE-040426-1491 | gstt1b            |  |
| ENSDARG00000071724 | 22.23020574 | -0.949837839 | 0.265118141 | -3.58269651  | 0.000340066 | 0.011988303 | ankha            | ZDB-GENE-050913-33   | ankha             |  |
| ENSDARG00000069375 | 178.320078  | -1.521961217 | 0.424873863 | -3.582148376 | 0.00034078  | 0.011993536 | zgc:162608       | ZDB-GENE-070410-86   | zgc:162608        |  |
| ENSDARG00000102554 | 8.461935489 | -1.19258969  | 0.333152159 | -3.579714728 | 0.00034397  | 0.012085708 | zgc:112433       | ZDB-GENE-050417-294  | zgc:112433        |  |
| ENSDARG00000098739 | 6.27345322  | -5.621379739 | 1.571266558 | -3.577610502 | 0.00034675  | 0.012155091 | h2af1a           |                      |                   |  |
| ENSDARG00000051923 | 43.84884501 | -1.338279359 | 0.374097676 | -3.57735277  | 0.000347092 | 0.012155091 | ccnb1            | ZDB-GENE-000406-10   | ccnb1             |  |
| ENSDARG00000032808 | 2.815566552 | -3.180811252 | 0.889503481 | -3.575940194 | 0.000348971 | 0.012200755 | tdrd7a           | ZDB-GENE-040426-2103 | tdrd7a            |  |
| ENSDARG00000006837 | 35.2380218  | 0.743428575  | 0.208028869 | 3.573679843  | 0.000351999 | 0.012284976 | mycn             | ZDB-GENE-020711-1    | mycn              |  |
| ENSDARG00000069279 | 32.55635148 | -0.868635858 | 0.243092151 | -3.573278092 | 0.00035254  | 0.012284976 | elovl7a          | ZDB-GENE-030131-6149 | elovl7a           |  |
| ENSDARG00000059123 | 92.45004506 | -0.536504398 | 0.150337906 | -3.56865685  | 0.000358816 | 0.012483144 | plcd1a           | ZDB-GENE-071004-78   | plcd1a            |  |
| ENSDARG00000029356 | 11.46972172 | -1.137391969 | 0.31888989  | -3.566723204 | 0.000361473 | 0.012554962 | mboat1           | ZDB-GENE-041114-98   | mboat1            |  |
| ENSDARG00000053476 | 232.915753  | -0.89747764  | 0.252341631 | -3.5565976   | 0.000375689 | 0.013027368 | lipca            | ZDB-GENE-040426-1361 | lipca             |  |
| ENSDARG00000012833 | 42.49523451 | -0.802398444 | 0.225686345 | -3.555369935 | 0.000377448 | 0.013052114 | foxn3            | ZDB-GENE-060512-39   | foxn3             |  |
| ENSDARG00000056559 | 158.2622662 | 0.647142588  | 0.182025024 | 3.555239678  | 0.000377635 | 0.013052114 | ccz1             | ZDB-GENE-040426-698  | ccz1              |  |
| ENSDARG00000109626 | 24.11569778 | -1.166286097 | 0.32821595  | -3.553410786 | 0.00038027  | 0.013121798 | si:ch211-226h7.3 | ZDB-GENE-130531-9    | si:ch211-226h7.3  |  |
| ENSDARG00000061682 | 36.81543255 | -0.584475187 | 0.164518026 | -3.552651354 | 0.00038137  | 0.013138336 | bicc1a           | ZDB-GENE-101223-3    | bicc1a            |  |
| ENSDARG00000061013 | 191.1449445 | 0.319514561  | 0.090001464 | 3.550104032  | 0.000385079 | 0.01324459  | ankfy1           | ZDB-GENE-041222-1    | ankfy1            |  |
| ENSDARG00000052215 | 31.78390741 | 0.721517468  | 0.203322205 | 3.548640777  | 0.000387225 | 0.013245159 | btr02            | ZDB-GENE-060825-228  | btr02             |  |
| ENSDARG00000043475 | 51.79636867 | -0.732642497 | 0.206462846 | -3.548544021 | 0.000387367 | 0.013245159 | TAGAP            | ZDB-GENE-121214-340  | si:ch211-122h15.4 |  |
| ENSDARG00000043475 | 51.79636867 | -0.732642497 | 0.206462846 | -3.548544021 | 0.000387367 | 0.013245159 | TAGAP            | ZDB-GENE-040724-50   | tagapb            |  |
| ENSDARG00000018266 | 65.1790441  | 0.952762339  | 0.26850274  | 3.548426877  | 0.00038754  | 0.013245159 | mthfd1a          | ZDB-GENE-041001-127  | mthfd1a           |  |
| ENSDARG00000089567 | 6.27235762  | -6.662227065 | 1.877535993 | -3.548388468 | 0.000387596 | 0.013245159 | patl2            | ZDB-GENE-121214-350  | patl2             |  |
| ENSDARG00000054122 | 27.51158495 | -0.732765396 | 0.20658053  | -3.547117411 | 0.000389471 | 0.013287796 | tmem30b          | ZDB-GENE-040704-17   | tmem30b           |  |
| ENSDARG00000095400 | 18.25202848 | -0.936000225 | 0.26393545  | -3.546322501 | 0.000390648 | 0.01330652  | si:ch73-52f15.5  | ZDB-GENE-091204-341  | si:ch73-52f15.5   |  |
| ENSDARG00000018263 | 1475.432246 | 0.829692429  | 0.234029211 | 3.545251574  | 0.000392239 | 0.013339258 | pdia2            | ZDB-GENE-040426-705  | pdia2             |  |
| ENSDARG00000017798 | 146.3739871 | 0.403539073  | 0.113853708 | 3.544364786  | 0.00039356  | 0.01336276  | bcor             | ZDB-GENE-040408-1    | bcor              |  |
| ENSDARG00000030957 | 110.7658168 | -0.339664579 | 0.095845699 | -3.543868786 | 0.000394301 | 0.013366503 | yipf4            | ZDB-GENE-040426-2253 | yipf4             |  |
| ENSDARG00000026787 | 15.49249049 | -0.839455136 | 0.236999103 | -3.542018207 | 0.000397078 | 0.013439126 | aqp7             | ZDB-GENE-030131-6461 | aqp7              |  |
| ENSDARG00000071150 | 358.0385122 | 0.388141495  | 0.109619436 | 3.540809089  | 0.000398902 | 0.013479328 | cica             | ZDB-GENE-060503-700  | cica              |  |
| ENSDARG00000042977 | 35.93772657 | 0.69431393   | 0.196164849 | 3.539441104  | 0.000400975 | 0.013527806 | nfil3            | ZDB-GENE-040822-28   | nfil3             |  |
| ENSDARG00000016233 | 77.60339272 | -0.459518955 | 0.129865606 | -3.538419219 | 0.00040253  | 0.013558684 | sdr16c5a         | ZDB-GENE-040426-2049 | sdr16c5a          |  |
| ENSDARG00000079891 | 52.92465751 | 0.569437255  | 0.161002322 | 3.53682634   | 0.000404966 | 0.01360166  | dnajc6           | ZDB-GENE-080104-2    | dnajc6            |  |
| ENSDARG00000077852 | 85.39036683 | 0.405401146  | 0.114625488 | 3.53674521   | 0.00040509  | 0.01360166  | samd11           | ZDB-GENE-060428-2    | samd11            |  |

|                    |             |              |             |              |             |             |                   |                      |                   |  |
|--------------------|-------------|--------------|-------------|--------------|-------------|-------------|-------------------|----------------------|-------------------|--|
| ENSDARG00000102055 | 507.9168227 | -0.36441389  | 0.103093528 | -3.534789202 | 0.000408101 | 0.013681055 | hadhb             | ZDB-GENE-030131-8550 | hadhb             |  |
| ENSDARG00000105034 | 6.62278708  | -1.590847184 | 0.450322798 | -3.532681872 | 0.000411367 | 0.013742073 | zdhhc18b          | ZDB-GENE-030131-6315 | zdhhc18b          |  |
| ENSDARG00000016538 | 2.197746638 | -3.245303279 | 0.918685227 | -3.532551939 | 0.000411569 | 0.013742073 | zgc:55888         | ZDB-GENE-040426-834  | zgc:55888         |  |
| ENSDARG00000008541 | 14.6036298  | -1.689623218 | 0.478326869 | -3.532361086 | 0.000411867 | 0.013742073 | chia.4            | ZDB-GENE-030131-9279 | chia.4            |  |
| ENSDARG00000014222 | 152.1849198 | -0.288526465 | 0.081817031 | -3.526484178 | 0.000421116 | 0.014028603 | zgc:86598         | ZDB-GENE-040625-181  | zgc:86598         |  |
| ENSDARG00000068749 | 64.13939871 | 0.732217288  | 0.207839284 | 3.522997551  | 0.000426695 | 0.01419214  | si:ch211-250k18.5 | ZDB-GENE-070912-244  | si:ch211-250k18.5 |  |
| ENSDARG00000069113 | 72.59340558 | 0.576505456  | 0.163714921 | 3.52139837   | 0.000429277 | 0.01425205  | dbn1              | ZDB-GENE-091204-284  | dbn1              |  |
| ENSDARG00000086017 | 0.90694839  | -3.91229271  | 1.111216602 | -3.520729175 | 0.000430362 | 0.01425205  | zgc:153681        | ZDB-GENE-060825-299  | zgc:153681        |  |
| ENSDARG00000087186 | 120.2696626 | -0.555652713 | 0.157827407 | -3.520635129 | 0.000430515 | 0.01425205  | si:ch211-232b12.5 | ZDB-GENE-031002-40   | si:ch211-232b12.5 |  |
| ENSDARG00000004378 | 91.12454969 | 0.369040944  | 0.104837968 | 3.52010775   | 0.000431372 | 0.014258141 | yrk               | ZDB-GENE-030131-9517 | yrk               |  |
| ENSDARG00000071589 | 19.39510947 | -0.882037392 | 0.250758683 | -3.517474976 | 0.000435673 | 0.014377902 | si:dkey-253d23.2  | ZDB-GENE-050208-410  | si:dkey-253d23.2  |  |
| ENSDARG00000020258 | 194.3883028 | 0.413029745  | 0.117487476 | 3.515521471  | 0.000438891 | 0.01446157  | ewsr1a            | ZDB-GENE-030131-2317 | ewsr1a            |  |
| ENSDARG00000024478 | 188.1462267 | -0.404378004 | 0.115084884 | -3.513736896 | 0.00044185  | 0.014536461 | mpc2              | ZDB-GENE-030131-330  | mpc2              |  |
| ENSDARG00000103687 | 1248.97542  | 0.896506492  | 0.255212629 | 3.512782638  | 0.00044344  | 0.014566147 | syncn.2           | ZDB-GENE-141212-321  | syncn.2           |  |
| ENSDARG00000016687 | 546.0483033 | -0.400503811 | 0.114086312 | -3.510533416 | 0.000447209 | 0.014667196 | acadvl            | ZDB-GENE-030131-899  | acadvl            |  |
| ENSDARG00000086103 | 38.7570387  | 0.731319851  | 0.208451902 | 3.508338589  | 0.000450915 | 0.014743626 | slc37a1           | ZDB-GENE-041114-151  | slc37a1           |  |
| ENSDARG00000023900 | 34.17251741 | -0.791501967 | 0.225606529 | -3.508329167 | 0.000450931 | 0.014743626 | casd1             | ZDB-GENE-060503-329  | casd1             |  |
| ENSDARG00000089489 | 19.53608002 | -0.800876632 | 0.228419144 | -3.506171232 | 0.000454603 | 0.014840781 | fam83e            | ZDB-GENE-141215-21   | fam83e            |  |
| ENSDARG00000003869 | 122.8734465 | -0.376759054 | 0.107596408 | -3.50159508  | 0.000462482 | 0.015074776 | decr1             | ZDB-GENE-040718-142  | decr1             |  |
| ENSDARG00000087094 | 2.75298835  | -2.579012611 | 0.736873061 | -3.499941504 | 0.00046536  | 0.015145296 | foxa              | ZDB-GENE-990415-76   | foxa              |  |
| ENSDARG00000061764 | 5063.047164 | -0.509774048 | 0.145793163 | -3.496556612 | 0.000471304 | 0.015315227 | ahnak             | ZDB-GENE-030131-8719 | ahnak             |  |
| ENSDARG00000090768 | 16.57710413 | -6.034048196 | 1.725982196 | -3.496008365 | 0.000472274 | 0.015323227 | zp3.2             | ZDB-GENE-071004-54   | zgc:173556        |  |
| ENSDARG00000090768 | 16.57710413 | -6.034048196 | 1.725982196 | -3.496008365 | 0.000472274 | 0.015323227 | zp3.2             | ZDB-GENE-050626-121  | zp3.2             |  |
| ENSDARG00000078882 | 33.61167647 | -0.576179787 | 0.164866819 | -3.494819585 | 0.000474382 | 0.015368101 | slc22a31          | ZDB-GENE-130530-858  | slc22a31          |  |
| ENSDARG00000001857 | 184.601249  | -0.434796537 | 0.124584878 | -3.489962363 | 0.000483089 | 0.015616835 | aff4              | ZDB-GENE-100910-5    | aff4              |  |
| ENSDARG00000028699 | 126.5151182 | 0.369199419  | 0.105796414 | 3.489715829  | 0.000483534 | 0.015616835 | crkl              | ZDB-GENE-040426-2951 | crkl              |  |
| ENSDARG00000056819 | 21.66013258 | 0.794395651  | 0.227797668 | 3.487286142  | 0.000487949 | 0.015735427 | hoxa9b            | ZDB-GENE-000823-2    | hoxa9b            |  |
| ENSDARG00000053820 | 6.972760468 | -1.393009168 | 0.399714504 | -3.485010309 | 0.000492118 | 0.01582389  | pcmt2a            | ZDB-GENE-060312-14   | pcmt2a            |  |
| ENSDARG00000039677 | 365.3452885 | -0.511951565 | 0.146902574 | -3.484973422 | 0.000492186 | 0.01582389  | dsc2l             | ZDB-GENE-031116-55   | dsc2l             |  |
| ENSDARG00000036587 | 153.7834515 | 0.425545397  | 0.122280259 | 3.480082549  | 0.000501259 | 0.016091183 | cb1               | ZDB-GENE-030902-2    | cb1               |  |
| ENSDARG00000089441 | 238.5031173 | -0.597782462 | 0.171875355 | -3.477999858 | 0.00050517  | 0.016192195 | si:ch211-105c13.3 | ZDB-GENE-030131-4483 | si:ch211-105c13.3 |  |
| ENSDARG00000100095 | 132.2290987 | -0.659742196 | 0.189832033 | -3.475399732 | 0.000510093 | 0.016325276 | anxa1b            | ZDB-GENE-030131-6554 | anxa1b            |  |
| ENSDARG00000020761 | 198.9465446 | -0.658448001 | 0.189509906 | -3.474478019 | 0.000511848 | 0.016349811 | arrdc2            | ZDB-GENE-030131-7146 | arrdc2            |  |
| ENSDARG00000058390 | 7.129362747 | -1.30595448  | 0.375916152 | -3.474057906 | 0.00051265  | 0.016349811 | acot9.2           | ZDB-GENE-051113-136  | acot9.2           |  |
| ENSDARG00000102756 | 5.518823894 | 2.329637749  | 0.670634061 | 3.473783816  | 0.000513174 | 0.016349811 | nr0b2b            | ZDB-GENE-080403-9    | nr0b2b            |  |
| ENSDARG00000042824 | 753.8200954 | 0.371212978  | 0.106934844 | 3.47139403   | 0.000517764 | 0.016471259 | nfe2l2a           | ZDB-GENE-030723-2    | nfe2l2a           |  |
| ENSDARG00000032849 | 413.995171  | 0.440150758  | 0.126987551 | 3.46609375   | 0.000528079 | 0.016774231 | ndrg1a            | ZDB-GENE-030826-34   | ndrg1a            |  |
| ENSDARG00000059247 | 20.67436242 | -0.733112267 | 0.211708707 | -3.462834756 | 0.000534517 | 0.016951838 | tmem54a           | ZDB-GENE-040426-1304 | tmem54a           |  |
| ENSDARG00000035415 | 10.20306981 | -1.068753474 | 0.308680436 | -3.462329809 | 0.00053552  | 0.016951838 | ptger4b           | ZDB-GENE-060531-102  | ptger4b           |  |
| ENSDARG00000068965 | 76.90698779 | 0.508523052  | 0.146894792 | 3.461818115  | 0.00053654  | 0.016951838 | nrip1a            | ZDB-GENE-040723-8    | nrip1a            |  |
| ENSDARG00000063075 | 95.94744283 | 0.458513622  | 0.132455147 | 3.461651986  | 0.000536871 | 0.016951838 | soga1             | ZDB-GENE-090313-188  | soga1             |  |
| ENSDARG00000008363 | 185.2923196 | -0.473369703 | 0.136766445 | -3.461153828 | 0.000537865 | 0.016957967 | mcl1b             | ZDB-GENE-030825-1    | mcl1b             |  |
| ENSDARG00000040764 | 306.6687074 | 0.451142921  | 0.130361194 | 3.460714862  | 0.000538743 | 0.016960402 | id1               | ZDB-GENE-990415-96   | id1               |  |
| ENSDARG00000102892 | 14.64996812 | -6.196812045 | 1.790951039 | -3.460067813 | 0.000540039 | 0.016975985 | h1m               | ZDB-GENE-030131-5614 | h1m               |  |
| ENSDARG00000075958 | 143.2589018 | 0.674037302  | 0.19488975  | 3.458556962  | 0.000543077 | 0.017046195 | si:dkey-266f7.9   | ZDB-GENE-070705-440  | si:dkey-266f7.9   |  |
| ENSDARG00000038898 | 2.954814444 | -2.348694318 | 0.67955441  | -3.456227029 | 0.000547794 | 0.017168795 | zgc:113691        | ZDB-GENE-050220-7    | zgc:113691        |  |
| ENSDARG00000062315 | 357.3982193 | 0.388280562  | 0.11245864  | 3.452652109  | 0.000555104 | 0.017372226 | sik2b             | ZDB-GENE-071012-1    | sik2b             |  |
| ENSDARG00000015156 | 181.708158  | 0.477398608  | 0.138309739 | 3.451663005  | 0.000557143 | 0.017386386 | fbln2             | ZDB-GENE-060711-1    | fbln2             |  |
| ENSDARG00000001879 | 200.0146341 | -0.500871111 | 0.145111204 | -3.451636376 | 0.000557198 | 0.017386386 | nav2b             | ZDB-GENE-061207-13   | nav2b             |  |

|                    |             |              |             |              |             |             |                   |                      |                   |  |
|--------------------|-------------|--------------|-------------|--------------|-------------|-------------|-------------------|----------------------|-------------------|--|
| ENSDARG00000025174 | 2.63365499  | -4.594913671 | 1.331400554 | -3.451188043 | 0.000558125 | 0.017389684 | zgc:103482        | ZDB-GENE-041010-115  | zgc:103482        |  |
| ENSDARG00000103370 | 103.665823  | -0.440963891 | 0.127786874 | -3.450776109 | 0.000558977 | 0.017390671 | lrrc8da           | ZDB-GENE-061009-26   | lrrc8da           |  |
| ENSDARG00000033501 | 8.08042004  | -1.190311229 | 0.34501078  | -3.450069676 | 0.000560442 | 0.017410678 | zgc:64189         | ZDB-GENE-040426-1397 | zgc:64189         |  |
| ENSDARG00000105626 | 1.144275373 | -4.7134978   | 1.366474485 | -3.449385885 | 0.000561863 | 0.017429275 | adad2             | ZDB-GENE-130530-788  | adad2             |  |
| ENSDARG00000045139 | 1.113282894 | -3.379219643 | 0.982232709 | -3.440345256 | 0.000580973 | 0.01799571  | ca7               | ZDB-GENE-040426-1786 | ca7               |  |
| ENSDARG00000037550 | 2.519723682 | -2.766677232 | 0.80469373  | -3.438174212 | 0.000585651 | 0.018114136 | cyp21a2           | ZDB-GENE-070103-6    | cyp21a2           |  |
| ENSDARG00000020893 | 392.0596123 | 0.326657809  | 0.095094806 | 3.435075205  | 0.000592389 | 0.018295852 | slc25a55a         | ZDB-GENE-040426-2745 | slc25a55a         |  |
| ENSDARG00000099411 | 23.29858028 | 0.80635229   | 0.234937438 | 3.432200065  | 0.000598706 | 0.018448512 | zgc:158343        | ZDB-GENE-061201-9    | zgc:158343        |  |
| ENSDARG00000034470 | 1706.75835  | -0.523091207 | 0.15241437  | -3.432033396 | 0.000599074 | 0.018448512 | aldoab            | ZDB-GENE-040426-2299 | aldoab            |  |
| ENSDARG00000045601 | 7.278157738 | -1.800181275 | 0.525014298 | -3.428823333 | 0.000606204 | 0.018640993 | cax1              | ZDB-GENE-030131-3044 | cax1              |  |
| ENSDARG00000009242 | 14.38497049 | -0.953497748 | 0.278343211 | -3.425618843 | 0.000613401 | 0.018834952 | fev               | ZDB-GENE-070112-1852 | fev               |  |
| ENSDARG00000077072 | 10.53004056 | -1.063988811 | 0.3106808   | -3.424700883 | 0.000615477 | 0.018871351 | si:ch73-280o22.2  | ZDB-GENE-141216-272  | si:ch73-280o22.2  |  |
| ENSDARG00000061021 | 87.91521237 | -0.519050472 | 0.151602956 | -3.423749031 | 0.000617636 | 0.018910203 | fam160a1a         | ZDB-GENE-090312-132  | fam160a1a         |  |
| ENSDARG00000043236 | 8.820878287 | -7.858906581 | 2.296695247 | -3.421832561 | 0.000622006 | 0.019001375 | ccna1             | ZDB-GENE-040311-2    | ccna1             |  |
| ENSDARG00000012823 | 11.88734353 | 1.067314757  | 0.311929209 | 3.421656985  | 0.000622408 | 0.019001375 | dlgap4b           | ZDB-GENE-101215-2    | dlgap4b           |  |
| ENSDARG00000092660 | 51.32585935 | 0.637827447  | 0.186574385 | 3.418622809  | 0.000629389 | 0.019186858 | cyp27c1           | ZDB-GENE-080204-68   | cyp27c1           |  |
| ENSDARG00000017917 | 1.515517599 | -4.058052083 | 1.187496865 | -3.41731604  | 0.000632418 | 0.0192515   | her7              | ZDB-GENE-000427-6    | her7              |  |
| ENSDARG00000010407 | 6.9211088   | -1.460809038 | 0.427531482 | -3.416845544 | 0.000633512 | 0.019257132 | ppp4r4            | ZDB-GENE-041001-164  | ppp4r4            |  |
| ENSDARG00000009196 | 26.75936947 | -1.155471824 | 0.338414634 | -3.414367191 | 0.000639304 | 0.019405335 | anxa3a            | ZDB-GENE-040912-58   | anxa3a            |  |
| ENSDARG00000028815 | 9.814809641 | -1.272646481 | 0.374002249 | -3.402777615 | 0.000667046 | 0.020218445 | zgc:162945        | ZDB-GENE-030131-3975 | zgc:162945        |  |
| ENSDARG00000035879 | 93.57426974 | 0.545678623  | 0.160540414 | 3.399010934  | 0.00066763  | 0.020469673 | fuca1.2           | ZDB-GENE-040801-78   | fuca1.2           |  |
| ENSDARG00000040300 | 50.90034996 | -0.580607071 | 0.170946096 | -3.396433642 | 0.000682701 | 0.020633934 | gtbbp10           | ZDB-GENE-040718-153  | gtbbp10           |  |
| ENSDARG00000059360 | 113.7238766 | 0.418396315  | 0.123269497 | 3.394159359  | 0.000688396 | 0.020776425 | srsf3b            | ZDB-GENE-071005-2    | srsf3b            |  |
| ENSDARG00000026655 | 158.3100456 | 0.438082413  | 0.129166369 | 3.391613596  | 0.000694824 | 0.020918202 | tspo              | ZDB-GENE-041010-125  | tspo              |  |
| ENSDARG00000079473 | 83.32364093 | 0.487957725  | 0.143875946 | 3.391517049  | 0.000695068 | 0.020918202 | map3k21           | ZDB-GENE-090312-24   | map3k21           |  |
| ENSDARG00000109774 | 182.1800915 | -0.578408071 | 0.170711013 | -3.388229375 | 0.000703454 | 0.021140542 | CABZ01084963.1    |                      |                   |  |
| ENSDARG00000007739 | 12.86704182 | -3.85412168  | 1.13887805  | -3.384139049 | 0.000714018 | 0.021427629 | atp1a1a.2         | ZDB-GENE-001212-2    | atp1a1a.2         |  |
| ENSDARG00000056150 | 56.20613947 | -0.50001088  | 0.147815561 | -3.3826674   | 0.000717855 | 0.021505732 | rbms2b            | ZDB-GENE-040801-51   | rbms2b            |  |
| ENSDARG00000036080 | 1742.558807 | 0.296116552  | 0.08754724  | 3.382363062  | 0.000718651 | 0.021505732 | cd81a             | ZDB-GENE-000831-5    | cd81a             |  |
| ENSDARG00000099117 | 4.211016238 | -3.982310479 | 1.177662032 | -3.381539331 | 0.000720809 | 0.021539892 | si:dkey-33i11.4   | ZDB-GENE-030131-33   | si:dkey-33i11.4   |  |
| ENSDARG00000008275 | 138.597484  | -0.673869432 | 0.199409558 | -3.379323642 | 0.000726644 | 0.021683674 | klhl24b           | ZDB-GENE-040426-1185 | klhl24b           |  |
| ENSDARG00000070892 | 577.1062886 | -0.483844811 | 0.143215719 | -3.3784337   | 0.000729    | 0.021723382 | si:ch211-262h13.5 | ZDB-GENE-050208-372  | si:ch211-262h13.5 |  |
| ENSDARG00000099213 | 170.0535816 | 0.318836838  | 0.094428362 | 3.376494425  | 0.000734159 | 0.021846374 | glyr1             | ZDB-GENE-041121-5    | glyr1             |  |
| ENSDARG00000039365 | 7.754679337 | -1.212893829 | 0.359298674 | -3.375725869 | 0.000736212 | 0.021876761 | cuedc2            | ZDB-GENE-030131-6283 | cuedc2            |  |
| ENSDARG00000034207 | 12.7536379  | -1.188382685 | 0.352275636 | -3.37344557  | 0.000742337 | 0.022027869 | cx44.2            | ZDB-GENE-010619-1    | cx44.2            |  |
| ENSDARG00000009594 | 404.0589549 | 0.446933929  | 0.132643931 | 3.36942615   | 0.000753249 | 0.022320393 | nr1d2b            | ZDB-GENE-990415-244  | nr1d2b            |  |
| ENSDARG00000102125 | 20.75761275 | -0.940726301 | 0.279449388 | -3.366356636 | 0.000761682 | 0.022538755 | iqsec2a           | ZDB-GENE-170302-3    | iqsec2a           |  |
| ENSDARG00000069640 | 12.59147376 | 0.787450959  | 0.233956892 | 3.365795095  | 0.000763234 | 0.022553187 | vegfc             | ZDB-GENE-040303-4    | vegfc             |  |
| ENSDARG00000028784 | 13.42114618 | -1.183121958 | 0.351629916 | -3.364679465 | 0.000766326 | 0.022613029 | si:dkey-24p1.6    | ZDB-GENE-060503-67   | si:dkey-24p1.6    |  |
| ENSDARG00000114552 | 6.486766574 | -1.80371445  | 0.536168703 | -3.364080076 | 0.000767993 | 0.022630679 | siva1             | ZDB-GENE-050506-57   | siva1             |  |
| ENSDARG00000055876 | 923.3286756 | 1.033401519  | 0.307499227 | 3.360663801  | 0.000777554 | 0.022856238 | msmo1             | ZDB-GENE-040426-2670 | msmo1             |  |
| ENSDARG00000113246 | 1.573710341 | -4.098760973 | 1.219660688 | -3.360574799 | 0.000777805 | 0.022856238 | CABZ01051901.1    |                      |                   |  |
| ENSDARG00000099774 | 115.4482209 | 0.772809316  | 0.230016537 | 3.359798938  | 0.000779992 | 0.022888772 | cyb5b             | ZDB-GENE-040426-2614 | cyb5b             |  |
| ENSDARG00000071662 | 43.3334218  | 0.521444496  | 0.155291617 | 3.357840601  | 0.000785539 | 0.02301966  | si:rp71-36a1.3    | ZDB-GENE-050208-566  | si:rp71-36a1.3    |  |
| ENSDARG00000045522 | 47.70394502 | -0.657926218 | 0.196020728 | -3.356411455 | 0.00078961  | 0.023106999 | acot15            | ZDB-GENE-041210-203  | acot15            |  |
| ENSDARG00000045834 | 624.8855788 | 0.751098375  | 0.223810795 | 3.355952397  | 0.000790922 | 0.023113463 | si:dkey-14d8.7    | ZDB-GENE-041210-143  | si:dkey-14d8.7    |  |
| ENSDARG00000062929 | 107.4252572 | -0.426563671 | 0.127130262 | -3.355327548 | 0.000792711 | 0.02313383  | FAM83G            | ZDB-GENE-121214-254  | si:dkeyp-9d4.4    |  |
| ENSDARG00000063921 | 15872.43767 | -0.40586441  | 0.121034395 | -3.353298127 | 0.000798546 | 0.023272081 | mt-nd5            | ZDB-GENE-011205-12   | mt-nd5            |  |
| ENSDARG00000013623 | 3238.876094 | -0.32533838  | 0.097045206 | -3.352441543 | 0.000801022 | 0.023312148 | vdac2             | ZDB-GENE-030131-845  | vdac2             |  |

|                     |             |              |             |              |             |             |                   |                      |                   |  |
|---------------------|-------------|--------------|-------------|--------------|-------------|-------------|-------------------|----------------------|-------------------|--|
| ENSDARG0000002509   | 10.12731894 | 1.443883481  | 0.430897712 | 3.350872935  | 0.000805573 | 0.023408105 | zgc:153911        | ZDB-GENE-061013-174  | zgc:153911        |  |
| ENSDARG00000071065  | 255.6925996 | 0.671688552  | 0.200494441 | 3.35016047   | 0.000807648 | 0.023408105 | g6pd              | ZDB-GENE-070508-4    | g6pd              |  |
| ENSDARG00000020289  | 4.914608185 | -2.222767701 | 0.663531604 | -3.349904793 | 0.000808393 | 0.023408105 | pif1              | ZDB-GENE-030131-4928 | pif1              |  |
| ENSDARG00000110186  | 90.36869913 | -0.572305578 | 0.170860471 | -3.349549336 | 0.000809431 | 0.023408105 | LO018535.1        |                      |                   |  |
| ENSDARG00000015449  | 169.6173559 | 0.339692332  | 0.101418602 | 3.349408536  | 0.000809843 | 0.023408105 | fut8a             | ZDB-GENE-031118-20   | fut8a             |  |
| ENSDARG00000067607  | 276.6996705 | 0.90281467   | 0.269602932 | 3.348682684  | 0.000811967 | 0.023437536 | sreb1             | ZDB-GENE-090812-3    | sreb1             |  |
| ENSDARG00000075754  | 42.66492946 | 0.598688297  | 0.178828744 | 3.347830348  | 0.000814469 | 0.023463224 | mri1              | ZDB-GENE-080204-109  | mri1              |  |
| ENSDARG00000039832  | 41.00522451 | 1.138821338  | 0.340217371 | 3.34733448   | 0.000815927 | 0.023463224 | gsta.2            | ZDB-GENE-070822-30   | gsta.2            |  |
| ENSDARG00000054916  | 255.852981  | -0.812430025 | 0.242715764 | -3.347248692 | 0.00081618  | 0.023463224 | eif4ebp3          | ZDB-GENE-041114-44   | eif4ebp3          |  |
| ENSDARG00000043332  | 23.78016833 | -0.669499856 | 0.200048522 | -3.346687331 | 0.000817834 | 0.023478928 | prkc              | ZDB-GENE-070511-1    | prkc              |  |
| ENSDARG00000043173  | 1996.667125 | 0.863064707  | 0.258110511 | 3.343779777  | 0.000826453 | 0.023694266 | CELA1 (1 of many) | ZDB-GENE-040801-12   | zgc:92745         |  |
| ENSDARG00000090617  | 39.93539097 | -0.559594795 | 0.167380074 | -3.343258148 | 0.000828008 | 0.023706774 | ctif              | ZDB-GENE-130530-1003 | ctif              |  |
| ENSDARG00000079281  | 89.52749545 | -0.563709805 | 0.168665446 | -3.342177177 | 0.00083124  | 0.023767177 | si:dkeypp-75h12.2 | ZDB-GENE-030131-7512 | si:dkeypp-75h12.2 |  |
| ENSDARG00000025855  | 27.64847373 | -0.814668937 | 0.243902049 | -3.340147978 | 0.000837338 | 0.023909261 | camk2n1a          | ZDB-GENE-050522-319  | camk2n1a          |  |
| ENSDARG00000077180  | 50.70277329 | -0.68707913  | 0.205849733 | -3.33777033  | 0.000844535 | 0.024082326 | slc37a4b          | ZDB-GENE-040426-827  | slc37a4b          |  |
| ENSDARG00000011170  | 1299.781712 | -0.344402579 | 0.103271903 | -3.334910757 | 0.000853268 | 0.024298635 | ndrg2             | ZDB-GENE-041212-15   | ndrg2             |  |
| ENSDARG00000025718  | 30.97676297 | -0.584832488 | 0.175398432 | -3.334308525 | 0.000855118 | 0.024318624 | cxc1b             | ZDB-GENE-030728-4    | cxc1b             |  |
| ENSDARG00000070964  | 239.3365322 | 0.950134042  | 0.285327549 | 3.329976533  | 0.000868533 | 0.024667037 | si:rp71-15k1.1    | ZDB-GENE-030131-1113 | si:rp71-15k1.1    |  |
| ENSDARG00000042641  | 1220.751735 | 1.164806527  | 0.349923089 | 3.328750125  | 0.000872366 | 0.024742738 | cyp51             | ZDB-GENE-040625-2    | cyp51             |  |
| ENSDARG00000005104  | 140.5162141 | -0.381859327 | 0.11477753  | -3.326951964 | 0.000878015 | 0.024849029 | limk2             | ZDB-GENE-040718-398  | limk2             |  |
| ENSDARG00000071173  | 7.24884059  | -3.814732403 | 1.146663423 | -3.326810925 | 0.00087846  | 0.024849029 | slc12a10.2        | ZDB-GENE-060503-425  | slc12a10.2        |  |
| ENSDARG00000069018  | 980.4652397 | 0.862170385  | 0.259198952 | 3.326288078  | 0.000880109 | 0.024862497 | cyp7a1            | ZDB-GENE-040426-1296 | cyp7a1            |  |
| ENSDARG00000004199  | 20.0611249  | -0.964426976 | 0.290034764 | -3.325211645 | 0.000883514 | 0.024895744 | spam1             | ZDB-GENE-050506-63   | spam1             |  |
| ENSDARG00000012234  | 210.1378009 | -0.561629287 | 0.168922265 | -3.325173218 | 0.000883636 | 0.024895744 | endouc            | ZDB-GENE-060503-141  | endouc            |  |
| ENSDARG00000074120  | 83.14815919 | -0.631767687 | 0.190173048 | -3.322067426 | 0.000893531 | 0.02514109  | usp2b             | ZDB-GENE-100208-2    | usp2b             |  |
| ENSDARG00000025641  | 84.3049597  | 0.421268957  | 0.126851912 | 3.320950788  | 0.000897114 | 0.025208415 | gli2a             | ZDB-GENE-990706-8    | gli2a             |  |
| ENSDARG00000045074  | 48.46247181 | -0.537587629 | 0.161921232 | -3.320056429 | 0.000899993 | 0.025255817 | arl4d             | ZDB-GENE-030131-2293 | arl4d             |  |
| ENSDARG00000061048  | 127.0601462 | -0.297417503 | 0.089592659 | -3.319663746 | 0.000901259 | 0.025257912 | ranbp9            | ZDB-GENE-021030-5    | ranbp9            |  |
| ENSDARG00000078188  | 77.44358824 | 0.413688748  | 0.124715732 | 3.317053435  | 0.000909722 | 0.025461405 | fam160a2          | ZDB-GENE-070912-291  | fam160a2          |  |
| ENSDARG00000086104  | 105.9597498 | -0.512081365 | 0.154463151 | -3.315233183 | 0.000915667 | 0.025593982 | slco5a1a          | ZDB-GENE-090316-1    | slco5a1a          |  |
| ENSDARG00000023176  | 338.43088   | -0.989143931 | 0.298434921 | -3.314437619 | 0.000918277 | 0.025610827 | tdo2b             | ZDB-GENE-030131-6014 | tdo2b             |  |
| ENSDARG00000035560  | 7.698028225 | 1.084822681  | 0.327314532 | 3.314312614  | 0.000918687 | 0.025610827 | capga             | ZDB-GENE-060531-6    | capga             |  |
| ENSDARG00000005355  | 37.76374141 | -0.917376503 | 0.277128715 | -3.310290317 | 0.000931993 | 0.025947602 | larp6a            | ZDB-GENE-030131-6403 | larp6a            |  |
| ENSDARG00000075557  | 58.93989112 | 0.540535417  | 0.163415587 | 3.307734756  | 0.000940538 | 0.026151166 | apcdd1l           | ZDB-GENE-121022-3    | apcdd1l           |  |
| ENSDARG00000025386  | 5.158199785 | -5.220008929 | 1.579998805 | -3.303805619 | 0.000953819 | 0.026485678 | lsm14b            | ZDB-GENE-040426-779  | lsm14b            |  |
| ENSDARG00000071009  | 21.36726493 | -0.906911638 | 0.274615603 | -3.302476727 | 0.00095835  | 0.026576662 | kif20ba           | ZDB-GENE-041111-213  | kif20ba           |  |
| ENSDARG00000071005  | 100.020493  | -0.866719584 | 0.262500068 | -3.301788036 | 0.000960706 | 0.026607172 | ppp1r3ca          | ZDB-GENE-040718-70   | ppp1r3ca          |  |
| ENSDARG00000057231  | 29.24604077 | 0.710203695  | 0.215130748 | 3.301265399  | 0.000962498 | 0.026621988 | rorca             | ZDB-GENE-990415-250  | rorca             |  |
| ENSDARG00000027154  | 95.99452581 | -0.453166578 | 0.137397924 | -3.29820541  | 0.000973049 | 0.026876316 | tpd52l2a          | ZDB-GENE-030131-7047 | tpd52l2a          |  |
| ENSDARG00000021664  | 18.83908785 | -0.922214137 | 0.279645869 | -3.297792815 | 0.00097448  | 0.026876316 | fzd3a             | ZDB-GENE-990415-225  | fzd3a             |  |
| ENSDARG000000103917 | 212.0675175 | -0.868894192 | 0.263505766 | -3.297439012 | 0.000975709 | 0.026876316 | znf185            | ZDB-GENE-061103-355  | znf185            |  |
| ENSDARG00000079361  | 171.1827592 | 0.671526259  | 0.203669657 | 3.297134531  | 0.000976767 | 0.026876316 | abcg2b            | ZDB-GENE-050517-36   | abcg2b            |  |
| ENSDARG00000024920  | 47.65403646 | 0.54493679   | 0.165301964 | 3.296614125  | 0.000978578 | 0.026891235 | tmem136a          | ZDB-GENE-000607-58   | tmem136a          |  |
| ENSDARG00000037266  | 60.49443615 | -0.5199107   | 0.157912379 | -3.292399895 | 0.000993363 | 0.027258782 | myoz2b            | ZDB-GENE-040426-1853 | myoz2b            |  |
| ENSDARG00000076998  | 6.311780838 | -1.255101417 | 0.381249859 | -3.292070506 | 0.000994527 | 0.027258782 | si:ch73-92i20.1   | ZDB-GENE-070705-270  | si:ch73-92i20.1   |  |
| ENSDARG00000062688  | 405.40399   | 0.353312387  | 0.107338436 | 3.291573837  | 0.000996285 | 0.027271682 | gpnmb             | ZDB-GENE-060503-106  | gpnmb             |  |
| ENSDARG00000070794  | 2.18596926  | -2.197670138 | 0.668426895 | -3.287824225 | 0.001009649 | 0.027562521 | greb1             | ZDB-GENE-070112-332  | greb1             |  |
| ENSDARG00000038683  | 11.00092731 | 1.772155748  | 0.539095959 | 3.28727329   | 0.001011626 | 0.027562521 | si:zfos-2330d3.1  | ZDB-GENE-110408-35   | si:zfos-2330d3.1  |  |
| ENSDARG00000016200  | 62.77172492 | -0.553867784 | 0.168495845 | -3.287130216 | 0.00101214  | 0.027562521 | trib3             | ZDB-GENE-040426-2609 | trib3             |  |



|                    |             |              |             |              |             |             |                   |                      |                   |  |
|--------------------|-------------|--------------|-------------|--------------|-------------|-------------|-------------------|----------------------|-------------------|--|
| ENSDARG00000097285 | 356.2137536 | 0.678790949  | 0.206509401 | 3.286973603  | 0.001012703 | 0.027562521 | ANPEP             | ZDB-GENE-131127-23   | si:ch211-147g22.5 |  |
| ENSDARG00000115205 | 11.98062755 | -5.735567048 | 1.745043478 | -3.286776015 | 0.001013414 | 0.027562521 | zgc:171445        | ZDB-GENE-080205-2    | zgc:171445        |  |
| ENSDARG00000098821 | 58.83515802 | -0.550901741 | 0.167645387 | -3.286113331 | 0.001015801 | 0.027592029 | sec14l1           | ZDB-GENE-040426-801  | sec14l1           |  |
| ENSDARG00000004405 | 5.894809932 | -1.828285493 | 0.557734259 | -3.278058439 | 0.001045238 | 0.028355247 | snx10a            | ZDB-GENE-050809-44   | snx10a            |  |
| ENSDARG00000098289 | 1.849723544 | -2.950827153 | 0.900571965 | -3.276614496 | 0.001050597 | 0.028464194 | vstm2l            | ZDB-GENE-040426-1548 | vstm2l            |  |
| ENSDARG00000017010 | 13.5901869  | -1.005104153 | 0.306899422 | -3.27502784  | 0.001056516 | 0.02858799  | scamp2l           | ZDB-GENE-030131-6432 | scamp2l           |  |
| ENSDARG00000074765 | 21.16967444 | 1.029385887  | 0.314597768 | 3.272069901  | 0.001067632 | 0.028851931 | mhc1zja           | ZDB-GENE-130206-11   | mhc1zja           |  |
| ENSDARG00000007751 | 6.036811923 | -1.595556762 | 0.48806027  | -3.269179771 | 0.001078597 | 0.029111114 | lmnl3             | ZDB-GENE-020424-4    | lmnl3             |  |
| ENSDARG00000053569 | 10.29713344 | -1.444419637 | 0.442072983 | -3.267378225 | 0.001085486 | 0.029259774 | sox3              | ZDB-GENE-980526-333  | sox3              |  |
| ENSDARG00000008447 | 226.6510632 | 0.354016941  | 0.10836139  | 3.267002573  | 0.001086927 | 0.029261399 | fkbp4             | ZDB-GENE-030131-514  | fkbp4             |  |
| ENSDARG00000103211 | 32.76911106 | -0.733864738 | 0.224776139 | -3.264869407 | 0.001095146 | 0.02944524  | si:dkey-19b23.8   | ZDB-GENE-030131-4634 | si:dkey-19b23.8   |  |
| ENSDARG00000105052 | 121.7360708 | 0.776662706  | 0.238039928 | 3.26274131   | 0.001103402 | 0.029629627 | cfhl5             | ZDB-GENE-050208-782  | cfhl5             |  |
| ENSDARG00000042859 | 46.74165926 | 0.723193227  | 0.221730282 | 3.261589808  | 0.001107893 | 0.029679207 | slc5a6a           | ZDB-GENE-041001-177  | slc5a6a           |  |
| ENSDARG00000045423 | 22.06476979 | -8.895594416 | 2.727413375 | -3.261549752 | 0.00110805  | 0.029679207 | si:ch211-146l10.8 | ZDB-GENE-160113-6    | si:ch211-146l10.8 |  |
| ENSDARG00000077040 | 45.65391189 | -0.49718673  | 0.152483946 | -3.260584094 | 0.00111183  | 0.029742854 | si:ch211-85n16.4  | ZDB-GENE-030131-7043 | si:ch211-85n16.4  |  |
| ENSDARG00000091912 | 6.465235154 | 2.258290257  | 0.693835169 | 3.254793583  | 0.001134748 | 0.030317664 | si:ch211-15j1.5   | ZDB-GENE-081031-11   | si:ch211-15j1.5   |  |
| ENSDARG00000070416 | 68.82772541 | 0.606185511  | 0.186355071 | 3.25285225   | 0.001142529 | 0.030487102 | zgc:162816        | ZDB-GENE-070410-94   | zgc:162816        |  |
| ENSDARG00000018726 | 35.49109992 | 0.548779485  | 0.16876571  | 3.251723849  | 0.001147074 | 0.030569886 | slco3a1           | ZDB-GENE-030131-8662 | slco3a1           |  |
| ENSDARG00000016343 | 91.88575339 | -0.456403469 | 0.140397992 | 3.250783443  | 0.001150875 | 0.030632645 | zgc:92518         | ZDB-GENE-040718-53   | zgc:92518         |  |
| ENSDARG00000055185 | 300.3862462 | 0.526371593  | 0.161997542 | 3.24925666   | 0.00115707  | 0.030758906 | tm4sf5            | ZDB-GENE-040718-65   | tm4sf5            |  |
| ENSDARG00000040527 | 37.90773014 | -0.508816326 | 0.156618706 | -3.248758338 | 0.001159099 | 0.030774225 | siae              | ZDB-GENE-040426-1032 | siae              |  |
| ENSDARG00000044514 | 7.0564573   | -1.650514221 | 0.50822908  | -3.247579262 | 0.001163912 | 0.030863344 | st6gal1           | ZDB-GENE-060322-3    | st6gal1           |  |
| ENSDARG00000043171 | 405.1333387 | 0.848306831  | 0.26127821  | 3.246756901  | 0.00116728  | 0.030913964 | zgc:112302        | ZDB-GENE-050626-127  | zgc:112302        |  |
| ENSDARG00000058158 | 36.51321353 | -0.526588472 | 0.162220029 | -3.246137203 | 0.001169824 | 0.030914739 | trim55b           | ZDB-GENE-060312-37   | trim55b           |  |
| ENSDARG00000039020 | 10.120603   | -1.441986983 | 0.444229713 | -3.246039019 | 0.001170228 | 0.030914739 | fbxo5             | ZDB-GENE-030131-4027 | fbxo5             |  |
| ENSDARG00000104643 | 2.037701381 | -2.336730521 | 0.721227153 | -3.239936977 | 0.001195561 | 0.031544652 | tuba7l            | ZDB-GENE-040704-78   | tuba7l            |  |
| ENSDARG00000100844 | 208.8614771 | 0.562129143  | 0.173596923 | 3.23812849   | 0.001203166 | 0.031683317 | cldn15lb          | ZDB-GENE-040718-145  | cldn15lb          |  |
| ENSDARG00000073704 | 44.01292965 | -0.840284976 | 0.259533394 | -3.237675747 | 0.001205077 | 0.031683317 | si:dkeyp-72g9.4   | ZDB-GENE-031204-23   | si:dkeyp-72g9.4   |  |
| ENSDARG00000060319 | 32.20234789 | -0.848611853 | 0.262137858 | -3.237273168 | 0.001206778 | 0.031683317 | scn4bb            | ZDB-GENE-031116-71   | scn4bb            |  |
| ENSDARG00000078284 | 146.5064993 | -0.405545623 | 0.125274017 | -3.237268439 | 0.001206798 | 0.031683317 | phkb              | ZDB-GENE-110411-149  | phkb              |  |
| ENSDARG00000055455 | 106.4650807 | 1.025133136  | 0.317027166 | 3.233581359  | 0.001222485 | 0.032055436 | gpm6aa            | ZDB-GENE-030710-7    | gpm6aa            |  |
| ENSDARG00000031763 | 45.2204771  | 0.504239132  | 0.155979218 | 3.232732795  | 0.001226122 | 0.032064588 | smad6b            | ZDB-GENE-050419-198  | smad6b            |  |
| ENSDARG00000078473 | 226.5966663 | 0.475532914  | 0.147111683 | 3.232461917  | 0.001227285 | 0.032064588 | nucks1a           | ZDB-GENE-040912-175  | nucks1a           |  |
| ENSDARG00000041359 | 61.13014717 | 0.411701674  | 0.127365561 | 3.232441096  | 0.001227374 | 0.032064588 | zgc:161969        | ZDB-GENE-030131-2597 | zgc:161969        |  |
| ENSDARG00000036636 | 27.29801382 | 0.892977035  | 0.276414157 | 3.230576339  | 0.001235409 | 0.032221108 | ebpl              | ZDB-GENE-030616-542  | ebpl              |  |
| ENSDARG00000100815 | 0.911180294 | -3.427859602 | 1.06114335  | -3.230345459 | 0.001236407 | 0.032221108 | srsf3a            | ZDB-GENE-030616-631  | srsf3a            |  |
| ENSDARG00000040700 | 12.56659163 | 0.882535017  | 0.273383862 | 3.228189876  | 0.001245763 | 0.032425026 | nab1b             | ZDB-GENE-081105-85   | nab1b             |  |
| ENSDARG00000039034 | 521.3621646 | 0.342638716  | 0.106180514 | 3.226945359  | 0.001251194 | 0.032492911 | marcks1a          | ZDB-GENE-040426-2146 | marcks1a          |  |
| ENSDARG00000007275 | 141.5248825 | -1.065157437 | 0.330087983 | -3.226889469 | 0.001251438 | 0.032492911 | si:ch211-251b21.1 | ZDB-GENE-060809-5    | si:ch211-251b21.1 |  |
| ENSDARG00000002002 | 14.54156107 | -0.829993903 | 0.25726362  | -3.22623892  | 0.001254286 | 0.032527    | lmcd1             | ZDB-GENE-040426-1067 | lmcd1             |  |
| ENSDARG00000016875 | 430.5495735 | -0.396721184 | 0.123083361 | -3.223191019 | 0.00126771  | 0.032834925 | gys1              | ZDB-GENE-040426-1243 | gys1              |  |
| ENSDARG00000045132 | 298.8461179 | -0.448401112 | 0.13926093  | -3.219862976 | 0.001282519 | 0.033177932 | vdac1             | ZDB-GENE-030131-6514 | vdac1             |  |
| ENSDARG00000055539 | 1936.200171 | 0.631462237  | 0.19622284  | 3.218087335  | 0.001290485 | 0.033343304 | epdl2             | ZDB-GENE-091204-250  | epdl2             |  |
| ENSDARG00000025218 | 78.43560954 | -0.41705115  | 0.129641155 | -3.216965714 | 0.001295541 | 0.033433158 | myo5ab            | ZDB-GENE-050411-72   | myo5ab            |  |
| ENSDARG00000069133 | 98.38514144 | 0.556615802  | 0.173241377 | 3.212949531  | 0.001313794 | 0.033862954 | mstnb             | ZDB-GENE-990415-165  | mstnb             |  |
| ENSDARG00000077938 | 119.8553955 | 0.359133653  | 0.111802474 | 3.212215611  | 0.001317155 | 0.033908335 | cd248b            | ZDB-GENE-050309-46   | cd248b            |  |
| ENSDARG00000011545 | 262.1365021 | 0.272661994  | 0.084896501 | 3.211698821  | 0.001319526 | 0.03392816  | arrb2b            | ZDB-GENE-040426-1332 | arrb2b            |  |
| ENSDARG00000098112 | 25.39579247 | 0.579967888  | 0.180795712 | 3.207863067  | 0.001337252 | 0.03434224  | btc               | ZDB-GENE-050311-1    | btc               |  |
| ENSDARG00000053575 | 1.268407183 | -3.468257378 | 1.081910554 | -3.205678478 | 0.001347445 | 0.034562116 | gpat2             | ZDB-GENE-050309-118  | gpat2             |  |

|                    |             |              |             |              |             |             |                  |                      |                  |  |
|--------------------|-------------|--------------|-------------|--------------|-------------|-------------|------------------|----------------------|------------------|--|
| ENSDARG0000062271  | 16.58873165 | -0.839279505 | 0.26186851  | -3.204965369 | 0.001350787 | 0.034598599 | slc25a15b        | ZDB-GENE-060526-35   | slc25a15b        |  |
| ENSDARG0000027316  | 209.7116264 | -0.483398361 | 0.15084144  | -3.204678776 | 0.001352133 | 0.034598599 | tcp11l2          | ZDB-GENE-040426-1956 | tcp11l2          |  |
| ENSDARG0000041592  | 46.72921429 | -0.443974252 | 0.138567772 | -3.204022453 | 0.001355219 | 0.03460625  | dcun1d2b         | ZDB-GENE-040625-171  | dcun1d2b         |  |
| ENSDARG0000043856  | 658.4788325 | 0.392121578  | 0.122388046 | 3.203920584  | 0.001355699 | 0.03460625  | amd1             | ZDB-GENE-040426-760  | amd1             |  |
| ENSDARG0000034916  | 87.30149836 | -0.356431554 | 0.11133222  | -3.201513056 | 0.001367079 | 0.034839789 | hat1             | ZDB-GENE-040912-99   | hat1             |  |
| ENSDARG0000071450  | 3.622310297 | -1.981565601 | 0.619046907 | -3.200994269 | 0.001369543 | 0.034839789 | tdrd5            | ZDB-GENE-050208-502  | tdrd5            |  |
| ENSDARG0000061242  | 186.1663469 | -0.560980647 | 0.175254743 | -3.200944162 | 0.001369781 | 0.034839789 | tuft1a           | ZDB-GENE-061103-184  | tuft1a           |  |
| ENSDARG00000103977 | 23.51540411 | -0.642715617 | 0.200815503 | -3.200527885 | 0.001371761 | 0.034848321 | terf2ip          | ZDB-GENE-131121-641  | terf2ip          |  |
| ENSDARG0000016357  | 160.0477923 | 0.463377409  | 0.144837749 | 3.199286193  | 0.001377683 | 0.034956858 | fmo5             | ZDB-GENE-030131-6606 | fmo5             |  |
| ENSDARG0000041895  | 256.2782907 | -0.447307568 | 0.139874845 | -3.197912867 | 0.001384261 | 0.035073956 | cad              | ZDB-GENE-021030-4    | cad              |  |
| ENSDARG0000060169  | 6.733603151 | -1.085823007 | 0.339570958 | -3.197632134 | 0.001385609 | 0.035073956 | mns1             | ZDB-GENE-030521-42   | mns1             |  |
| ENSDARG0000005894  | 162.188521  | 0.605073297  | 0.189266668 | 3.196935329  | 0.001388961 | 0.03508806  | slc7a9           | ZDB-GENE-080116-2    | slc7a9           |  |
| ENSDARG00000059701 | 304.3539773 | 0.268321682  | 0.083933731 | 3.196827781  | 0.001389479 | 0.03508806  | flii             | ZDB-GENE-071212-3    | flii             |  |
| ENSDARG00000075143 | 45.71028904 | 0.545726478  | 0.170747485 | 3.196102584  | 0.001392976 | 0.035134497 | nanp             | ZDB-GENE-050522-94   | nanp             |  |
| ENSDARG0000017988  | 61.16333435 | 0.465024711  | 0.145528392 | 3.195422589  | 0.001396262 | 0.035175517 | dse              | ZDB-GENE-041001-202  | dse              |  |
| ENSDARG0000053761  | 17.19955178 | 0.89360716   | 0.279781679 | 3.193944521  | 0.001403431 | 0.03524981  | si:dkey-187j14.4 | ZDB-GENE-131119-26   | si:dkey-187j14.4 |  |
| ENSDARG0000078093  | 12.54306355 | 1.125939336  | 0.352529954 | 3.193882737  | 0.001403731 | 0.03524981  | zgc:172065       | ZDB-GENE-080214-2    | zgc:172065       |  |
| ENSDARG00000037491 | 1.159150839 | -4.031707299 | 1.262359948 | -3.193785818 | 0.001404203 | 0.03524981  | bmp15            | ZDB-GENE-030131-6115 | bmp15            |  |
| ENSDARG0000001154  | 5.993138352 | -1.621373926 | 0.508223467 | -3.19027757  | 0.001421362 | 0.035638341 | rimbp2           | ZDB-GENE-040724-96   | rimbp2           |  |
| ENSDARG0000023058  | 71.12211815 | 0.412400648  | 0.129284565 | 3.189867626  | 0.00142338  | 0.035646746 | foxo3a           | ZDB-GENE-050116-1    | foxo3a           |  |
| ENSDARG0000013266  | 36.80926    | 0.646599407  | 0.202988956 | 3.185392044  | 0.00144558  | 0.036159987 | colec11          | ZDB-GENE-041114-11   | colec11          |  |
| ENSDARG00000096110 | 75.26534518 | 0.559398227  | 0.175687254 | 3.184056978  | 0.001452264 | 0.036284342 | zgc:123278       | ZDB-GENE-051127-21   | zgc:123278       |  |
| ENSDARG0000063912  | 29288.28351 | -0.308896063 | 0.097058807 | -3.182566052 | 0.001459762 | 0.036428717 | mt-co3           | ZDB-GENE-011205-16   | mt-co3           |  |
| ENSDARG0000016536  | 14.30152025 | 1.062547278  | 0.334075695 | 3.180558462  | 0.001469915 | 0.036638923 | npas2            | ZDB-GENE-030408-3    | npas2            |  |
| ENSDARG00000095540 | 1.859374561 | 2.865763973  | 0.901180486 | 3.180011128  | 0.001472694 | 0.036665061 | sid1             | ZDB-GENE-020620-1    | sid1             |  |
| ENSDARG0000062702  | 4.367922617 | -1.402911201 | 0.441523156 | -3.177435161 | 0.001485839 | 0.036948912 | ankmy1           | ZDB-GENE-050208-740  | ankmy1           |  |
| ENSDARG0000022712  | 186.9385694 | 0.328370674  | 0.103393972 | 3.175916993  | 0.001493637 | 0.037099277 | stat3            | ZDB-GENE-980526-68   | stat3            |  |
| ENSDARG00000108812 | 1.298136248 | -2.790654187 | 0.879142916 | -3.174289567 | 0.001502038 | 0.037264251 | zgc:113886       | ZDB-GENE-050913-91   | zgc:113886       |  |
| ENSDARG0000013763  | 952.5174314 | 0.447978061  | 0.141351615 | 3.169246142  | 0.001528349 | 0.037855761 | rrbp1a           | ZDB-GENE-030131-9795 | rrbp1a           |  |
| ENSDARG00000103025 | 1293.468916 | 1.170711302  | 0.369421879 | 3.169036189  | 0.001529454 | 0.037855761 | hmgcs1           | ZDB-GENE-040426-1042 | hmgcs1           |  |
| ENSDARG00000100886 | 4.041028634 | -1.546997906 | 0.488250437 | -3.168451656 | 0.001532532 | 0.037887704 | si:dkeyp-97a10.1 | ZDB-GENE-131121-449  | si:dkeyp-97a10.1 |  |
| ENSDARG00000091609 | 192.7237089 | 0.717162033  | 0.226448605 | 3.166996919  | 0.00154022  | 0.038033369 | spink4           | ZDB-GENE-130821-1    | spink4           |  |
| ENSDARG00000061274 | 115.6465088 | 1.317349968  | 0.41601586  | 3.166585927  | 0.001542398 | 0.038042817 | lss              | ZDB-GENE-050119-7    | lss              |  |
| ENSDARG0000003795  | 1325.434694 | -0.362034523 | 0.114351402 | -3.165982369 | 0.001545602 | 0.038073544 | idh2             | ZDB-GENE-031118-95   | idh2             |  |
| ENSDARG00000100185 | 5.440194487 | -2.115522235 | 0.668269003 | -3.165674637 | 0.001547238 | 0.038073544 | elovl7b          | ZDB-GENE-030131-5485 | elovl7b          |  |
| ENSDARG0000006588  | 1011.927339 | 0.585279367  | 0.185088435 | 3.162160662  | 0.001566031 | 0.03845327  | zgc:111983       | ZDB-GENE-050417-335  | zgc:111983       |  |
| ENSDARG0000052405  | 22.45948179 | -0.652514478 | 0.206359682 | -3.16202503  | 0.001566761 | 0.03845327  | pak6b            | ZDB-GENE-041014-121  | pak6b            |  |
| ENSDARG00000019195 | 41.50796361 | -0.729644586 | 0.230792526 | -3.161474066 | 0.001569728 | 0.03845327  | vps9d1           | ZDB-GENE-050306-57   | vps9d1           |  |
| ENSDARG00000021866 | 92.79452445 | -0.615900761 | 0.194827197 | -3.161266852 | 0.001570845 | 0.03845327  | upk1a            | ZDB-GENE-060421-2603 | upk1a            |  |
| ENSDARG00000076939 | 78.9534155  | -0.497737187 | 0.157456942 | -3.161100309 | 0.001571744 | 0.03845327  | znf451           | ZDB-GENE-081107-14   | znf451           |  |
| ENSDARG00000021494 | 404.0111755 | -0.420839229 | 0.133147875 | -3.160690547 | 0.001573956 | 0.038462987 | hnf4a            | ZDB-GENE-030131-1077 | hnf4a            |  |
| ENSDARG0000043843  | 79.30380305 | 0.549372555  | 0.173867923 | 3.159711962  | 0.001579252 | 0.038547936 | akap7            | ZDB-GENE-040724-128  | akap7            |  |
| ENSDARG00000012534 | 9.233468244 | -1.179512721 | 0.373554375 | -3.157539576 | 0.001591066 | 0.038791626 | slc6a6a          | ZDB-GENE-081104-1    | slc6a6a          |  |
| ENSDARG00000087709 | 7.602806981 | -1.339692495 | 0.424883653 | -3.153080817 | 0.001615571 | 0.039317345 | fat3b            | ZDB-GENE-130530-969  | fat3b            |  |
| ENSDARG00000045414 | 2233.201505 | 0.650646276  | 0.206361655 | 3.152941751  | 0.001616341 | 0.039317345 | elovl2           | ZDB-GENE-060421-5612 | elovl2           |  |
| ENSDARG00000020764 | 20.90760266 | -0.769475315 | 0.244121853 | -3.152013246 | 0.001621489 | 0.039397352 | slmapb           | ZDB-GENE-040426-809  | slmapb           |  |
| ENSDARG00000059923 | 76.58200978 | -0.527159483 | 0.167363658 | -3.149784662 | 0.001633908 | 0.039653629 | slc25a47a        | ZDB-GENE-060616-266  | slc25a47a        |  |
| ENSDARG00000027611 | 169.1033194 | -0.387433817 | 0.123037962 | -3.148896577 | 0.001638882 | 0.039728821 | cavin2a          | ZDB-GENE-090313-215  | cavin2a          |  |
| ENSDARG0000060498  | 13.56965007 | 0.955946142  | 0.303635979 | 3.14832961   | 0.001642064 | 0.039760474 | tnfrsf9a         | ZDB-GENE-060421-8213 | tnfrsf9a         |  |

|                    |             |              |             |              |              |             |                   |                      |                   |  |
|--------------------|-------------|--------------|-------------|--------------|--------------|-------------|-------------------|----------------------|-------------------|--|
| ENSDARG00000100236 | 5.357761148 | -1.186235324 | 0.376836763 | -3.147875796 | 0.0016444616 | 0.039776792 | cspp1a            | ZDB-GENE-120709-73   | cspp1a            |  |
| ENSDARG00000039255 | 123.7881845 | -0.383374097 | 0.121938351 | -3.143999359 | 0.001666558  | 0.040225801 | klhl21            | ZDB-GENE-040426-2627 | klhl21            |  |
| ENSDARG00000096587 | 3.621627746 | 1.705911423  | 0.542722456 | 3.143248276  | 0.001670841  | 0.040225801 | itgam             | ZDB-GENE-110510-4    | itgam             |  |
| ENSDARG00000023920 | 162.085795  | 0.296727356  | 0.094404058 | 3.143163132  | 0.001671327  | 0.040225801 | llgl2             | ZDB-GENE-030131-9877 | llgl2             |  |
| ENSDARG00000088923 | 3.986709357 | -7.02379099  | 2.234649463 | -3.143128758 | 0.001671523  | 0.040225801 | si:ch211-12h2.8   | ZDB-GENE-091118-43   | si:ch211-12h2.8   |  |
| ENSDARG00000060439 | 1.742533378 | -3.487171542 | 1.109643778 | -3.142604509 | 0.001674519  | 0.040225801 | clcn2c            | ZDB-GENE-050506-73   | clcn2c            |  |
| ENSDARG00000056515 | 39.80929773 | -0.852115666 | 0.271159921 | -3.142483827 | 0.00167521   | 0.040225801 | spsb1             | ZDB-GENE-030131-6122 | spsb1             |  |
| ENSDARG00000043175 | 736.2395396 | 0.770201444  | 0.24511039  | 3.142263553  | 0.001676471  | 0.040225801 | CELA1 (1 of many) | ZDB-GENE-050522-187  | zgc:112368        |  |
| ENSDARG00000095281 | 45.24238569 | -5.595684281 | 1.781029162 | -3.141826311 | 0.001678976  | 0.040240345 | zgc:152652        | ZDB-GENE-060818-27   | zgc:152652        |  |
| ENSDARG00000102690 | 10.67839668 | -0.957741978 | 0.304904287 | -3.141123361 | 0.001683011  | 0.04029148  | rims2b            | ZDB-GENE-060503-893  | rims2b            |  |
| ENSDARG00000041257 | 22.0221236  | -1.059992849 | 0.33751928  | -3.140540147 | 0.001686366  | 0.040326224 | smtnl1            | ZDB-GENE-050306-23   | smtnl1            |  |
| ENSDARG00000071010 | 15.81691157 | -0.814906995 | 0.259637939 | -3.138628351 | 0.001697406  | 0.040500831 | tuft1b            | ZDB-GENE-060503-150  | tuft1b            |  |
| ENSDARG00000100552 | 34.35635252 | -0.508905013 | 0.162143247 | -3.138613673 | 0.001697491  | 0.040500831 | taco1             | ZDB-GENE-070410-35   | taco1             |  |
| ENSDARG00000052000 | 59.13076043 | 0.485905203  | 0.154845902 | 3.137992012  | 0.001701095  | 0.040541173 | cav2              | ZDB-GENE-040625-164  | cav2              |  |
| ENSDARG00000035603 | 129.5875004 | 0.52061325   | 0.165992207 | 3.136371633  | 0.001710523  | 0.040720057 | dao.2             | ZDB-GENE-040426-2634 | dao.2             |  |
| ENSDARG00000037057 | 320.6871051 | 0.436243724  | 0.139139406 | 3.1352996    | 0.001716787  | 0.040792044 | gcdha             | ZDB-GENE-040426-1855 | gcdha             |  |
| ENSDARG00000034989 | 10.57493606 | -5.640124739 | 1.798970809 | -3.135195252 | 0.001717398  | 0.040792044 | retsatl           | ZDB-GENE-051113-252  | retsatl           |  |
| ENSDARG00000020123 | 220.7877987 | -0.456440065 | 0.145632296 | -3.134195352 | 0.001723261  | 0.040885474 | coq8a             | ZDB-GENE-040718-487  | coq8a             |  |
| ENSDARG00000078550 | 6.852800127 | -1.561973576 | 0.498649148 | -3.132409994 | 0.001733776  | 0.041011886 | zgc:194839        | ZDB-GENE-081022-153  | zgc:194839        |  |
| ENSDARG00000103398 | 761.3516238 | 0.746046943  | 0.23817337  | 3.132369262  | 0.001734016  | 0.041011886 | fabp1b.2          | ZDB-GENE-100318-6    | fabp1b.2          |  |
| ENSDARG00000102668 | 16.86953856 | 0.777303323  | 0.248156973 | 3.132304982  | 0.001734396  | 0.041011886 | slc16a5b          | ZDB-GENE-131120-181  | slc16a5b          |  |
| ENSDARG00000009874 | 8.603876839 | 3.399769165  | 1.086129325 | 3.130169757  | 0.001747053  | 0.041265122 | cyp2k6            | ZDB-GENE-040426-1571 | cyp2k6            |  |
| ENSDARG00000052575 | 18.91084019 | 1.044463409  | 0.334003433 | 3.127103811  | 0.001765376  | 0.041619009 | arl13a            | ZDB-GENE-040426-1790 | arl13a            |  |
| ENSDARG00000051962 | 135.8930373 | 0.321536558  | 0.102825699 | 3.127005796  | 0.001765964  | 0.041619009 | mmp15a            | ZDB-GENE-070817-4    | mmp15a            |  |
| ENSDARG00000011925 | 115.0044256 | -0.39404523  | 0.126075099 | -3.125480237 | 0.00177515   | 0.041789003 | spns1             | ZDB-GENE-020228-1    | spns1             |  |
| ENSDARG00000099712 | 20.36539189 | -0.919741187 | 0.294359154 | -3.124554392 | 0.001780746  | 0.041874212 | zgc:163073        | ZDB-GENE-070410-135  | zgc:163073        |  |
| ENSDARG00000035751 | 791.1918886 | -0.363260713 | 0.116473584 | -3.118824899 | 0.001815738  | 0.04264972  | ipo7              | ZDB-GENE-030131-458  | ipo7              |  |
| ENSDARG00000019969 | 82.63512675 | 0.458489962  | 0.147266894 | 3.113326767  | 0.001849911  | 0.043404274 | smarcd3b          | ZDB-GENE-080509-2    | smarcd3b          |  |
| ENSDARG00000007264 | 50.85467298 | -0.573834435 | 0.184370489 | -3.112398506 | 0.001855738  | 0.043492836 | nipsnap2          | ZDB-GENE-991008-18   | nipsnap2          |  |
| ENSDARG00000092778 | 66.00734491 | -0.991651128 | 0.319220739 | -3.106474636 | 0.001893325  | 0.044324737 | si:ch73-338o16.4  | ZDB-GENE-131119-14   | si:ch73-338o16.4  |  |
| ENSDARG00000089861 | 36.57622327 | -0.506753783 | 0.163185958 | -3.105376158 | 0.001900372  | 0.044440593 | usp44             | ZDB-GENE-040426-774  | usp44             |  |
| ENSDARG00000040059 | 111.0650733 | -0.837471545 | 0.269713314 | -3.105043394 | 0.001902511  | 0.044441569 | gbp               | ZDB-GENE-990714-7    | gbp               |  |
| ENSDARG00000067713 | 90.57403036 | 0.361809018  | 0.116619577 | 3.10247239   | 0.001919114  | 0.044780043 | snx18a            |                      |                   |  |
| ENSDARG00000092578 | 77.72190695 | -1.076257441 | 0.346974807 | -3.10183166  | 0.001923273  | 0.044827705 | si:ch211-222e20.4 | ZDB-GENE-091118-60   | si:ch211-222e20.4 |  |
| ENSDARG00000041078 | 286.4876912 | 0.433860828  | 0.139931145 | 3.100530819  | 0.001931741  | 0.044975603 | chka              | ZDB-GENE-050208-149  | chka              |  |
| ENSDARG00000092498 | 3.260334585 | -5.315799847 | 1.715031957 | -3.099533991 | 0.001938253  | 0.045077688 | si:dkeyp-46h3.2   | ZDB-GENE-030131-7351 | si:dkeyp-46h3.2   |  |
| ENSDARG00000028804 | 135.6242268 | -0.632207898 | 0.204081726 | -3.097817282 | 0.001949516  | 0.045289904 | ankrd9            | ZDB-GENE-041114-3    | ankrd9            |  |
| ENSDARG00000016143 | 127.8139121 | -0.465470917 | 0.150471191 | -3.093422155 | 0.001978625  | 0.045915792 | xiap              | ZDB-GENE-030825-7    | xiap              |  |
| ENSDARG00000074842 | 78.35978845 | 0.601612515  | 0.19450559  | 3.09303457   | 0.001981211  | 0.045925501 | snx8a             | ZDB-GENE-031202-1    | snx8a             |  |
| ENSDARG00000104256 | 596.5516143 | 0.733804616  | 0.237332103 | 3.091889409  | 0.001988869  | 0.046005338 | bco1              | ZDB-GENE-010508-1    | bco1              |  |
| ENSDARG00000028322 | 154.4341073 | -0.360111823 | 0.116470547 | -3.091870275 | 0.001988997  | 0.046005338 | pex14             | ZDB-GENE-060130-169  | pex14             |  |
| ENSDARG00000034138 | 0.849866087 | -3.292062453 | 1.065158075 | -3.090679712 | 0.001996989  | 0.046139814 | shisa2a           | ZDB-GENE-030925-31   | shisa2a           |  |
| ENSDARG00000019418 | 11.69034718 | 0.974788879  | 0.315615682 | 3.088531197  | 0.002011486  | 0.046380098 | kcj2a             | ZDB-GENE-120319-1    | kcj2a             |  |
| ENSDARG00000098588 | 31.77265564 | 0.665787772  | 0.215570668 | 3.088489633  | 0.002011767  | 0.046380098 | gchfr             | ZDB-GENE-040426-1731 | gchfr             |  |
| ENSDARG0000004588  | 175.0406777 | 0.294759642  | 0.09545624  | 3.087903346  | 0.00201574   | 0.046390962 | sox4a             | ZDB-GENE-030131-8290 | sox4a             |  |
| ENSDARG00000004017 | 92.10640798 | 0.572805248  | 0.185507503 | 3.087774024  | 0.002016618  | 0.046390962 | spag1a            | ZDB-GENE-030131-9443 | spag1a            |  |
| ENSDARG00000015649 | 85.54960639 | 0.344682055  | 0.111661124 | 3.086858206  | 0.002022841  | 0.046429841 | rap2c             | ZDB-GENE-041024-1    | rap2c             |  |
| ENSDARG00000069956 | 120.2495007 | -0.416328647 | 0.134884614 | -3.086554022 | 0.002024911  | 0.046429841 | pdlim2            | ZDB-GENE-070308-4    | pdlim2            |  |
| ENSDARG00000017696 | 70.26411402 | -0.524637141 | 0.169983319 | -3.086403668 | 0.002025936  | 0.046429841 | utp25             | ZDB-GENE-021217-2    | utp25             |  |

|                    |             |              |             |              |             |             |                   |                      |                   |  |
|--------------------|-------------|--------------|-------------|--------------|-------------|-------------|-------------------|----------------------|-------------------|--|
| ENSDARG00000075737 | 12.90956288 | -5.644968883 | 1.829078355 | -3.086236775 | 0.002027073 | 0.046429841 | zgc:165518        | ZDB-GENE-070720-15   | zgc:165518        |  |
| ENSDARG00000038207 | 331.936552  | 0.39432907   | 0.127813457 | 3.085192115  | 0.002034207 | 0.046499867 | aldh4a1           | ZDB-GENE-040426-1179 | aldh4a1           |  |
| ENSDARG00000011609 | 136.4140357 | -0.462563999 | 0.149940958 | -3.084974275 | 0.002035698 | 0.046499867 | FOXK2             | ZDB-GENE-030131-5310 | si:ch211-262e15.1 |  |
| ENSDARG00000005800 | 100.9499364 | -0.657489468 | 0.213136668 | -3.084825689 | 0.002036715 | 0.046499867 | ampd3a            | ZDB-GENE-110407-2    | ampd3a            |  |
| ENSDARG00000023151 | 8015.287487 | -0.578892179 | 0.187763825 | -3.083086849 | 0.002048654 | 0.046720942 | ucp1              | ZDB-GENE-010503-1    | ucp1              |  |
| ENSDARG00000101362 | 68.95832242 | -0.664440208 | 0.21553322  | -3.082774008 | 0.002050808 | 0.046720942 | mibp              | ZDB-GENE-030404-1    | mibp              |  |
| ENSDARG00000054666 | 230.2570966 | -0.410267393 | 0.13311252  | -3.082109719 | 0.002055391 | 0.046775039 | pgpep1            | ZDB-GENE-050522-88   | pgpep1            |  |
| ENSDARG00000061858 | 792.9546191 | -0.673339963 | 0.218556976 | -3.080844068 | 0.002064147 | 0.046923912 | zgc:153968        | ZDB-GENE-061027-211  | zgc:153968        |  |
| ENSDARG00000095463 | 5.497370877 | -5.490267684 | 1.782765074 | -3.079636102 | 0.002072537 | 0.047031352 | si:ch73-90k17.1   | ZDB-GENE-090312-218  | si:ch73-90k17.1   |  |
| ENSDARG00000013072 | 89.98521624 | 0.394529275  | 0.128113698 | 3.079524524  | 0.002073313 | 0.047031352 | mmp15b            | ZDB-GENE-070817-6    | mmp15b            |  |
| ENSDARG00000069013 | 317.7729684 | 0.445306716  | 0.144734593 | 3.076712381  | 0.002092971 | 0.047426509 | prdx4             | ZDB-GENE-030131-1096 | prdx4             |  |
| ENSDARG00000055989 | 38.02708237 | -0.48748315  | 0.158463871 | -3.076304699 | 0.002095836 | 0.04744067  | tmem161b          | ZDB-GENE-040426-2693 | tmem161b          |  |
| ENSDARG00000100225 | 36.5937944  | -0.469100458 | 0.152513072 | -3.075804915 | 0.002099352 | 0.047469542 | kif16ba           | ZDB-GENE-090313-233  | kif16ba           |  |
| ENSDARG00000018524 | 273.247774  | -0.511851687 | 0.166460566 | -3.07491257  | 0.002105643 | 0.047561036 | midn              | ZDB-GENE-030131-2433 | midn              |  |
| ENSDARG00000079241 | 9.123095778 | -0.960008064 | 0.31231826  | -3.073813434 | 0.002113416 | 0.047685767 | wdr90             | ZDB-GENE-070424-67   | wdr90             |  |
| ENSDARG00000097527 | 1.696936688 | 2.404399122  | 0.782383693 | 3.073171315  | 0.002117969 | 0.047700612 | ms4a17a.5         | ZDB-GENE-040912-55   | ms4a17a.5         |  |
| ENSDARG00000053558 | 6.451465959 | -1.744260472 | 0.567592522 | -3.073085713 | 0.002118576 | 0.047700612 | rtkn2a            | ZDB-GENE-041010-225  | rtkn2a            |  |
| ENSDARG00000032496 | 126.4930216 | 0.538855078  | 0.175459273 | 3.071111985  | 0.002132631 | 0.047956958 | pon1              | ZDB-GENE-040912-6    | pon1              |  |
| ENSDARG00000104636 | 50.76286604 | -0.453087955 | 0.147550005 | -3.070741721 | 0.002135278 | 0.047956958 | si:key-112a7.4    | ZDB-GENE-030131-9661 | si:key-112a7.4    |  |
| ENSDARG00000008858 | 63.33204569 | 0.531879072  | 0.173220292 | 3.070535594  | 0.002136752 | 0.047956958 | cyp7b1            | ZDB-GENE-070912-293  | cyp7b1            |  |
| ENSDARG00000104207 | 391.8772711 | 0.591034819  | 0.192573423 | 3.069140123  | 0.002146759 | 0.048094215 | pcyt1bb           | ZDB-GENE-051120-48   | pcyt1bb           |  |
| ENSDARG00000053959 | 28.96422926 | 0.712809033  | 0.232257237 | 3.069049825  | 0.002147408 | 0.048094215 | cdc42ep2          | ZDB-GENE-050320-104  | cdc42ep2          |  |
| ENSDARG00000078875 | 1.223597895 | 3.77490563   | 1.230608156 | 3.067512279  | 0.002158486 | 0.048285702 | adm2b             | ZDB-GENE-081104-279  | adm2b             |  |
| ENSDARG00000087392 | 15.91016015 | -6.684079982 | 2.17919003  | -3.067231352 | 0.002160516 | 0.048285702 | si:ch73-160p18.3  | ZDB-GENE-141212-268  | si:ch73-160p18.3  |  |
| ENSDARG00000025421 | 129.3836933 | -0.312463673 | 0.101922413 | -3.065701276 | 0.002171602 | 0.048482321 | tldr3             | ZDB-GENE-040426-19   | tldr3             |  |
| ENSDARG00000041586 | 20.0460186  | -0.602630051 | 0.196651626 | -3.064454959 | 0.00218067  | 0.048612975 | dhx40             | ZDB-GENE-080507-1    | dhx40             |  |
| ENSDARG00000044525 | 46.04915397 | -0.540460112 | 0.176375022 | -3.064266727 | 0.002182043 | 0.048612975 | pparda            | ZDB-GENE-990415-212  | pparda            |  |
| ENSDARG00000054473 | 11.75770331 | -0.855995412 | 0.279592488 | -3.061582299 | 0.002201705 | 0.04899949  | tinf2             | ZDB-GENE-030131-6168 | tinf2             |  |
| ENSDARG00000024431 | 17.18126885 | 0.763641169  | 0.249461249 | 3.061161494  | 0.002204801 | 0.049016923 | ets1              | ZDB-GENE-021115-5    | ets1              |  |
| ENSDARG00000013711 | 697.4915346 | 0.377786077  | 0.123478874 | 3.059519953  | 0.00221692  | 0.049234684 | zgc:77486         | ZDB-GENE-040426-2056 | zgc:77486         |  |
| ENSDARG00000104760 | 50.02247696 | -0.501862311 | 0.164098205 | -3.058304705 | 0.002225931 | 0.049353623 | si:ch211-1i11.3   | ZDB-GENE-030131-8638 | si:ch211-1i11.3   |  |
| ENSDARG00000104500 | 86.89912946 | -0.532159872 | 0.174012541 | -3.058169654 | 0.002226935 | 0.049353623 | fyc01a            | ZDB-GENE-110411-276  | fyc01a            |  |
| ENSDARG00000004713 | 15.27287285 | -0.990021195 | 0.323842805 | -3.05710419  | 0.002234866 | 0.04947764  | mad2l1            | ZDB-GENE-030515-3    | mad2l1            |  |
| ENSDARG00000029463 | 94.68992599 | 0.383981841  | 0.12563159  | 3.056411542  | 0.002240036 | 0.049481988 | asap1a            | ZDB-GENE-070912-129  | asap1a            |  |
| ENSDARG00000091136 | 603.1109635 | 0.963304438  | 0.315187658 | 3.056288572  | 0.002240955 | 0.049481988 | zgc:174259        | ZDB-GENE-080213-10   | zgc:174259        |  |
| ENSDARG00000104493 | 51.69076939 | 0.504077318  | 0.164956939 | 3.055811533  | 0.002244523 | 0.049481988 | LO018176.1        |                      |                   |  |
| ENSDARG00000026369 | 3450.643843 | 0.605558339  | 0.198183573 | 3.055542542  | 0.002246537 | 0.049481988 | dbi               | ZDB-GENE-040426-1861 | dbi               |  |
| ENSDARG00000068214 | 947.0039324 | 0.260846805  | 0.085370669 | 3.05546165   | 0.002247143 | 0.049481988 | ccni              | ZDB-GENE-040426-2898 | ccni              |  |
| ENSDARG00000054211 | 15.25516398 | -0.845671217 | 0.276830029 | -3.054839175 | 0.002251812 | 0.049481988 | st8sia7.1         | ZDB-GENE-090504-4    | st8sia7.1         |  |
| ENSDARG00000103271 | 165.6894414 | -0.378675739 | 0.12396526  | -3.054692402 | 0.002252915 | 0.049481988 | pla2g15           | ZDB-GENE-030131-6948 | pla2g15           |  |
| ENSDARG00000104696 | 63.14260866 | -0.445467512 | 0.145835847 | -3.054581716 | 0.002253746 | 0.049481988 | apooa             | ZDB-GENE-031118-91   | apooa             |  |
| ENSDARG00000029874 | 118.8872079 | 0.417213427  | 0.13662561  | 3.053698536  | 0.002260391 | 0.049576505 | khk               | ZDB-GENE-040718-381  | khk               |  |
| ENSDARG00000038312 | 46.34681924 | -0.492441803 | 0.161453116 | -3.050060685 | 0.002287951 | 0.050129084 | rcl1              | ZDB-GENE-040930-11   | rcl1              |  |
| ENSDARG00000053961 | 42.8396183  | -0.700862199 | 0.229967936 | -3.047651825 | 0.00230637  | 0.050480432 | slc2a11a          | ZDB-GENE-080723-20   | slc2a11a          |  |
| ENSDARG00000026925 | 101.605054  | 1.189103537  | 0.39025504  | 3.046990856  | 0.002311447 | 0.050539356 | nos2a             | ZDB-GENE-040305-1    | nos2a             |  |
| ENSDARG00000057064 | 859.0098111 | -0.594933648 | 0.195306477 | -3.046154216 | 0.002317889 | 0.050627956 | enpep             | ZDB-GENE-050309-218  | enpep             |  |
| ENSDARG00000101271 | 7.413502751 | -1.109090149 | 0.36415873  | -3.045622853 | 0.002321989 | 0.050665273 | si:ch211-227n13.3 | ZDB-GENE-141222-2    | si:ch211-227n13.3 |  |
| ENSDARG00000102586 | 8.061486131 | -1.072449023 | 0.352175583 | -3.045211179 | 0.00232517  | 0.050682483 | zgc:152938        | ZDB-GENE-061013-458  | zgc:152938        |  |
| ENSDARG00000088079 | 94.78852999 | 0.685669888  | 0.225286192 | 3.043550444  | 0.002338042 | 0.050782316 | tmed6             | ZDB-GENE-131121-182  | tmed6             |  |

|                    |             |              |             |              |             |             |                    |                      |                    |  |
|--------------------|-------------|--------------|-------------|--------------|-------------|-------------|--------------------|----------------------|--------------------|--|
| ENSDARG00000104732 | 29.15706601 | -0.763330174 | 0.25080762  | -3.043488771 | 0.002338522 | 0.050782316 | mlycd              | ZDB-GENE-070410-120  | mlycd              |  |
| ENSDARG00000095217 | 430.9843127 | -0.986818186 | 0.324272823 | -3.043172653 | 0.00234098  | 0.050782316 | zgc:66156          | ZDB-GENE-040426-1554 | zgc:66156          |  |
| ENSDARG0000007753  | 14.15672699 | 0.803289423  | 0.263964582 | 3.04317124   | 0.002340991 | 0.050782316 | cpne2              | ZDB-GENE-030131-7896 | cpne2              |  |
| ENSDARG0000017314  | 39392.55521 | 0.696768502  | 0.228968508 | 3.043075697  | 0.002341734 | 0.050782316 | CELA1 (1 of many)  | ZDB-GENE-040808-55   | zgc:92041          |  |
| ENSDARG00000101170 | 9.604498278 | -0.860359549 | 0.282792132 | -3.042374427 | 0.002347197 | 0.050848741 | rab42b             | ZDB-GENE-050417-172  | rab42b             |  |
| ENSDARG00000052099 | 1003.972635 | 0.441123602  | 0.145021789 | 3.041774645  | 0.002351879 | 0.050883638 | agxta              | ZDB-GENE-040718-16   | agxta              |  |
| ENSDARG00000063899 | 12765.10769 | -0.386555398 | 0.127091456 | -3.041552979 | 0.002353611 | 0.050883638 | mt-nd2             | ZDB-GENE-011205-8    | mt-nd2             |  |
| ENSDARG00000051956 | 61.9025332  | -0.451405787 | 0.14851146  | -3.039535043 | 0.002369436 | 0.051173545 | isca1              | ZDB-GENE-050626-94   | isca1              |  |
| ENSDARG00000041317 | 137.1508289 | -0.406979461 | 0.134084125 | -3.035254617 | 0.002403327 | 0.051852637 | rangap1a           | ZDB-GENE-060929-492  | rangap1a           |  |
| ENSDARG00000037398 | 13.82232233 | -1.061181271 | 0.349727285 | -3.034310778 | 0.002410859 | 0.051962236 | zgc:113229         | ZDB-GENE-050417-475  | zgc:113229         |  |
| ENSDARG00000038095 | 20.270346   | -1.398580094 | 0.461130591 | -3.032937134 | 0.00242186  | 0.052146299 | socs1a             | ZDB-GENE-040801-205  | socs1a             |  |
| ENSDARG00000040732 | 3.7050744   | -4.593715422 | 1.514942474 | -3.032270532 | 0.002427216 | 0.052208546 | elavl2             | ZDB-GENE-040704-9    | elavl2             |  |
| ENSDARG00000055575 | 118.6300142 | 0.320935134  | 0.105872253 | 3.031343205  | 0.002434683 | 0.052316061 | pcolce2b           | ZDB-GENE-040426-1177 | pcolce2b           |  |
| ENSDARG00000074697 | 216.9031714 | 0.588795431  | 0.194271469 | 3.030786946  | 0.002439173 | 0.05235943  | npdc1a             | ZDB-GENE-031204-31   | npdc1a             |  |
| ENSDARG00000113928 | 5.981808757 | -1.186399818 | 0.391527118 | -3.030185556 | 0.002444035 | 0.052410705 | B3GAT1             |                      |                    |  |
| ENSDARG00000104593 | 82.51925382 | 1.276812918  | 0.421489729 | 3.029285956  | 0.002451325 | 0.052513884 | cyp2k18            | ZDB-GENE-040426-1584 | cyp2k18            |  |
| ENSDARG00000021120 | 45.23222176 | -0.623863375 | 0.206096066 | -3.027051344 | 0.00246952  | 0.052850224 | ndc1               | ZDB-GENE-030131-7176 | ndc1               |  |
| ENSDARG00000075850 | 76.06051781 | -0.478542921 | 0.158112155 | -3.026604245 | 0.002473175 | 0.05287504  | gnal2              | ZDB-GENE-040718-441  | gnal2              |  |
| ENSDARG00000020574 | 2948.433249 | -0.796411746 | 0.263302467 | -3.024702939 | 0.002488774 | 0.053154903 | atp2a1             | ZDB-GENE-020905-1    | atp2a1             |  |
| ENSDARG00000063169 | 1.521015241 | -3.427423909 | 1.133432043 | -3.023934192 | 0.002495107 | 0.053236489 | ubn1               | ZDB-GENE-070928-28   | ubn1               |  |
| ENSDARG00000019856 | 96.94432634 | -0.642784246 | 0.212677656 | -3.022340286 | 0.002508284 | 0.053463797 | atp1a1b            | ZDB-GENE-001212-5    | atp1a1b            |  |
| ENSDARG00000079188 | 0.923943881 | 3.03537567   | 1.004495485 | 3.021791251  | 0.002512838 | 0.053507028 | nxph2b             | ZDB-GENE-090708-1    | nxph2b             |  |
| ENSDARG00000062054 | 210.2673559 | -0.642749255 | 0.212790149 | -3.020578061 | 0.002522927 | 0.053667919 | cpt1ab             | ZDB-GENE-030131-3250 | cpt1ab             |  |
| ENSDARG00000094316 | 13.99504862 | 0.932973593  | 0.309083416 | 3.018517149  | 0.00254015  | 0.053943999 | si:rp71-80o10.4    | ZDB-GENE-090313-413  | si:rp71-80o10.4    |  |
| ENSDARG00000078552 | 38.71699933 | -0.745297545 | 0.24693349  | -3.018211693 | 0.002542712 | 0.053943999 | grhl3              | ZDB-GENE-030131-9854 | grhl3              |  |
| ENSDARG0000007697  | 199.2653846 | 1.540762969  | 0.510505456 | 3.018112637  | 0.002543543 | 0.053943999 | fabp7a             | ZDB-GENE-000627-1    | fabp7a             |  |
| ENSDARG00000019709 | 118.6622285 | 0.431595116  | 0.143043175 | 3.017236701  | 0.002550905 | 0.054044847 | rhousa             | ZDB-GENE-040618-3    | rhousa             |  |
| ENSDARG00000097869 | 6.529635213 | -1.19317029  | 0.395519347 | -3.016717891 | 0.002555275 | 0.054044847 | si:dkey-1m11.6     | ZDB-GENE-131121-262  | si:dkey-1m11.6     |  |
| ENSDARG00000102569 | 80.92795347 | -0.450466687 | 0.149334033 | -3.016503857 | 0.00255708  | 0.054044847 | polr3a             | ZDB-GENE-050208-103  | polr3a             |  |
| ENSDARG00000011498 | 41.32423262 | 0.425613512  | 0.141102853 | 3.016335263  | 0.002558502 | 0.054044847 | si:ch211-212o1.2   | ZDB-GENE-041111-310  | si:ch211-212o1.2   |  |
| ENSDARG00000040100 | 18.08992328 | 0.818417815  | 0.271390013 | 3.015651923  | 0.002564274 | 0.054112831 | si:dkey-95h12.1    | ZDB-GENE-060503-85   | si:dkey-95h12.1    |  |
| ENSDARG00000074148 | 27.57621001 | 0.70452141   | 0.233652315 | 3.015255431  | 0.002567629 | 0.054125425 | rbpj1              | ZDB-GENE-050307-4    | rbpj1              |  |
| ENSDARG00000095688 | 3.790221765 | -1.929251601 | 0.639889153 | -3.014977813 | 0.002569981 | 0.054125425 | zgc:162509         | ZDB-GENE-050809-100  | zgc:162509         |  |
| ENSDARG00000011449 | 30.98523577 | 0.72936889   | 0.242135121 | 3.012239147  | 0.002593282 | 0.054561934 | fes                | ZDB-GENE-100812-10   | fes                |  |
| ENSDARG00000021985 | 27.99556339 | -0.545153761 | 0.181034476 | -3.01132565  | 0.002601097 | 0.054672072 | ercc2              | ZDB-GENE-040426-997  | ercc2              |  |
| ENSDARG00000022996 | 101.0980958 | -0.690641273 | 0.229371803 | -3.011012092 | 0.002603785 | 0.05467432  | setx               | ZDB-GENE-070402-1    | setx               |  |
| ENSDARG00000052343 | 3.184153828 | -1.618396326 | 0.53771572  | -3.009761972 | 0.002614525 | 0.054845486 | spata18            | ZDB-GENE-050522-306  | spata18            |  |
| ENSDARG00000039256 | 21.7822663  | -1.260022409 | 0.418781124 | -3.008785106 | 0.002622946 | 0.054967706 | spega              | ZDB-GENE-030131-3230 | spega              |  |
| ENSDARG00000062042 | 19.87380545 | 0.925825855  | 0.307871803 | 3.007179761  | 0.002636838 | 0.055204233 | mthfsd             | ZDB-GENE-030131-3513 | mthfsd             |  |
| ENSDARG00000037359 | 42.41891078 | -0.653939342 | 0.217498271 | -3.006641567 | 0.00264151  | 0.055247461 | si:ch1073-272o11.3 | ZDB-GENE-121214-325  | si:ch1073-272o11.3 |  |
| ENSDARG00000100549 | 35.06375105 | -0.541600398 | 0.180237288 | -3.004929799 | 0.002656422 | 0.055504539 | CABZ01079427.1     |                      |                    |  |
| ENSDARG00000112575 | 43.94659766 | -0.801865191 | 0.266951318 | -3.003788099 | 0.00266641  | 0.055658346 | CU467905.1         |                      |                    |  |
| ENSDARG00000042141 | 53.26419799 | 0.490595609  | 0.163353551 | 3.00327484   | 0.002670911 | 0.055697433 | myo6b              | ZDB-GENE-030318-3    | myo6b              |  |
| ENSDARG00000100719 | 29.44339022 | 0.857222126  | 0.285530661 | 3.002206914  | 0.002680299 | 0.05583825  | uraha              | ZDB-GENE-060825-253  | uraha              |  |
| ENSDARG00000016908 | 11.99639237 | -6.348352768 | 2.115456589 | -3.000937386 | 0.002691499 | 0.055995959 | zgc:171779         | ZDB-GENE-071004-38   | zgc:171779         |  |
| ENSDARG00000102119 | 119.9161796 | 0.664765474  | 0.221533104 | 3.000750048  | 0.002693155 | 0.055995959 | si:ch73-359m17.2   | ZDB-GENE-141222-90   | si:ch73-359m17.2   |  |
| ENSDARG00000055226 | 141.1960412 | -0.596543145 | 0.1988893   | -2.999372742 | 0.002705361 | 0.056194594 | slc7a7             | ZDB-GENE-051127-5    | slc7a7             |  |
| ENSDARG00000008788 | 14.69242009 | -1.054237414 | 0.351558336 | -2.998755275 | 0.00271085  | 0.056253447 | camk1gb            | ZDB-GENE-040426-1694 | camk1gb            |  |
| ENSDARG00000068140 | 77.41061309 | 0.460447727  | 0.153584431 | 2.998010431  | 0.002717484 | 0.056335937 | si:dkey-24l11.2    | ZDB-GENE-050419-208  | si:dkey-24l11.2    |  |

|                    |             |              |             |              |             |             |                   |                      |                   |  |
|--------------------|-------------|--------------|-------------|--------------|-------------|-------------|-------------------|----------------------|-------------------|--|
| ENSDARG00000029432 | 1.679065962 | -2.615132545 | 0.872478094 | -2.997361839 | 0.002723273 | 0.056400761 | tph1a             | ZDB-GENE-030317-1    | tph1a             |  |
| ENSDARG00000092610 | 51.50999944 | -0.544233751 | 0.181691724 | -2.995368959 | 0.002741131 | 0.056715168 | lamp1b            | ZDB-GENE-030131-9303 | lamp1b            |  |
| ENSDARG00000054707 | 128.9488151 | -0.27318215  | 0.09122454  | -2.994612513 | 0.002747937 | 0.056800525 | dhx8              | ZDB-GENE-050809-39   | dhx8              |  |
| ENSDARG00000077298 | 98.89225758 | 0.374361446  | 0.125128923 | 2.991805872  | 0.002773326 | 0.057269443 | gas1a             | ZDB-GENE-050302-155  | gas1a             |  |
| ENSDARG00000075022 | 1.001643624 | -4.424878763 | 1.479224508 | -2.991350358 | 0.002777466 | 0.057299102 | si:ch211-93e11.8  | ZDB-GENE-121214-283  | si:ch211-93e11.8  |  |
| ENSDARG00000098497 | 42.0891706  | 0.463245011  | 0.154916453 | 2.990289292  | 0.002787133 | 0.057442604 | hrasa             | ZDB-GENE-050417-95   | hrasa             |  |
| ENSDARG00000099757 | 23.86613728 | -0.73376553  | 0.245449464 | -2.989477012 | 0.002794555 | 0.057499424 | wdr47b            | ZDB-GENE-121114-10   | wdr47b            |  |
| ENSDARG00000090870 | 40.26331531 | -5.772806634 | 1.93109623  | -2.98939356  | 0.002795318 | 0.057499424 | si:ch1073-263o8.2 | ZDB-GENE-030131-5362 | si:ch1073-263o8.2 |  |
| ENSDARG00000006019 | 1668.564401 | 0.693738685  | 0.23210913  | 2.988847042  | 0.002800323 | 0.057546498 | tktb              | ZDB-GENE-030909-13   | tktb              |  |
| ENSDARG00000104542 | 23.7412033  | 0.582923668  | 0.195154857 | 2.986980072  | 0.002817481 | 0.057842992 | ppt2              | ZDB-GENE-010430-4    | ppt2              |  |
| ENSDARG00000025783 | 34.35211528 | 1.15613105   | 0.387318533 | 2.984961862  | 0.002836137 | 0.058169633 | si:ch211-125e6.11 | ZDB-GENE-070912-35   | si:ch211-125e6.11 |  |
| ENSDARG00000060010 | 303.2312103 | 0.329849534  | 0.110524829 | 2.984393086  | 0.002841415 | 0.058221524 | iqgap2            | ZDB-GENE-030131-2878 | iqgap2            |  |
| ENSDARG00000037178 | 3.034913781 | 1.932224681  | 0.647609638 | 2.983625579  | 0.002848551 | 0.058311356 | zic2b             | ZDB-GENE-030219-92   | zic2b             |  |
| ENSDARG00000057035 | 109.3087542 | 0.814930365  | 0.273233884 | 2.982537724  | 0.002858694 | 0.058462503 | stoml3b           | ZDB-GENE-050417-366  | stoml3b           |  |
| ENSDARG00000101595 | 2.53706522  | -5.988946286 | 2.01012716  | -2.97938678  | 0.002888259 | 0.059010177 | tgm1l2            | ZDB-GENE-110408-37   | tgm1l2            |  |
| ENSDARG00000098348 | 8.489928027 | -1.514873819 | 0.508610779 | -2.978454021 | 0.002897065 | 0.059083395 | znf326            | ZDB-GENE-070424-227  | znf326            |  |
| ENSDARG00000044980 | 68.39432323 | -0.373955643 | 0.125555192 | -2.978416411 | 0.00289742  | 0.059083395 | kpna6             | ZDB-GENE-130530-626  | kpna6             |  |
| ENSDARG00000099154 | 238.1617568 | 0.4321477    | 0.145138258 | 2.977489926  | 0.002906192 | 0.059205278 | CABZ01032488.1    |                      |                   |  |
| ENSDARG00000098822 | 107.8873642 | -0.309929719 | 0.104110969 | -2.976917057 | 0.002911628 | 0.059259035 | tcerg1a           | ZDB-GENE-030131-1791 | tcerg1a           |  |
| ENSDARG00000027590 | 231.1196455 | 0.368362688  | 0.123837614 | 2.974562231  | 0.002934069 | 0.059610054 | sept2             | ZDB-GENE-030131-911  | sept2             |  |
| ENSDARG00000020107 | 275.5785965 | -0.388120171 | 0.130488792 | -2.97435639  | 0.002936039 | 0.059610054 | usp2a             | ZDB-GENE-041212-59   | usp2a             |  |
| ENSDARG00000053956 | 379.0469917 | 0.37546499   | 0.12623969  | 2.974223004  | 0.002937315 | 0.059610054 | sptbn2            | ZDB-GENE-030131-787  | sptbn2            |  |
| ENSDARG00000086685 | 94.94352214 | -0.467098658 | 0.157147787 | -2.972352754 | 0.002955269 | 0.059813751 | trim63b           | ZDB-GENE-040426-1003 | trim63b           |  |
| ENSDARG00000018077 | 0.63824011  | -3.71084625  | 1.248524204 | -2.972186071 | 0.002956874 | 0.059813751 | rbp1              | ZDB-GENE-050421-2    | rbp1              |  |
| ENSDARG00000052625 | 258.8735672 | 0.415747701  | 0.139889331 | 2.97197575   | 0.002958901 | 0.059813751 | fkbp1b            | ZDB-GENE-040426-1785 | fkbp1b            |  |
| ENSDARG00000079611 | 29.60677064 | 0.545259317  | 0.183478896 | 2.971782196  | 0.002960766 | 0.059813751 | sema4c            | ZDB-GENE-080303-16   | sema4c            |  |
| ENSDARG00000056141 | 226.4510902 | -0.326539532 | 0.109882725 | -2.971709437 | 0.002961468 | 0.059813751 | coq10b            | ZDB-GENE-050417-263  | coq10b            |  |
| ENSDARG00000104530 | 159.6028252 | 0.331500312  | 0.111584771 | 2.970838313  | 0.002969881 | 0.05992654  | znf609b           | ZDB-GENE-030131-5095 | znf609b           |  |
| ENSDARG00000091699 | 282.4703114 | 0.331484048  | 0.111688353 | 2.967937486  | 0.002998053 | 0.060388938 | capn2a            | ZDB-GENE-050320-69   | capn2a            |  |
| ENSDARG00000098312 | 494.8305341 | 0.422927434  | 0.142500955 | 2.967891933  | 0.002998497 | 0.060388938 | scarb2a           | ZDB-GENE-020419-29   | scarb2a           |  |
| ENSDARG00000092483 | 2.351378775 | -1.703699315 | 0.574195202 | -2.967108241 | 0.003006151 | 0.060485587 | iqcc              | ZDB-GENE-090313-325  | iqcc              |  |
| ENSDARG00000018542 | 4.385820049 | -1.396670243 | 0.47081137  | -2.966517656 | 0.003011931 | 0.060505993 | hapln4            | ZDB-GENE-060503-243  | hapln4            |  |
| ENSDARG00000098837 | 13.72558487 | -1.767438634 | 0.595815157 | -2.966421067 | 0.003012877 | 0.060505993 | tgm5l             | ZDB-GENE-110411-176  | tgm5l             |  |
| ENSDARG00000044899 | 46.00432885 | 0.571183611  | 0.192613178 | 2.965444099  | 0.003022463 | 0.06064102  | tmem183a          | ZDB-GENE-050327-5    | tmem183a          |  |
| ENSDARG00000012341 | 48.25166645 | -0.68446929  | 0.230942777 | -2.963804713 | 0.003038611 | 0.060907324 | capn9             | ZDB-GENE-010724-2    | capn9             |  |
| ENSDARG00000025953 | 61.11954701 | 0.390869214  | 0.131963309 | 2.961953718  | 0.003056937 | 0.061216759 | rhoq              | ZDB-GENE-030131-5721 | rhoq              |  |
| ENSDARG00000079372 | 130.215316  | -0.422530476 | 0.142761398 | -2.959696964 | 0.003079418 | 0.061608712 | si:ch211-264f5.6  | ZDB-GENE-081104-208  | si:ch211-264f5.6  |  |
| ENSDARG00000044751 | 184.183746  | 0.609705222  | 0.206040516 | 2.959152074  | 0.003084868 | 0.061659532 | ddt               | ZDB-GENE-040625-160  | ddt               |  |
| ENSDARG00000068064 | 105.1351267 | -0.499148601 | 0.168702822 | -2.958744824 | 0.003088948 | 0.061682879 | sirt1             | ZDB-GENE-070801-2    | sirt1             |  |
| ENSDARG00000056744 | 19728.72787 | 0.692695392  | 0.234179887 | 2.957962795  | 0.003096795 | 0.061781352 | ela2              | ZDB-GENE-041117-1    | ela2              |  |
| ENSDARG00000062109 | 15.70596915 | -0.7762782   | 0.262463259 | -2.957664261 | 0.003099795 | 0.061783035 | shdb              | ZDB-GENE-030131-6059 | shdb              |  |
| ENSDARG00000088087 | 692.080737  | -0.362077956 | 0.122513773 | -2.955406139 | 0.003122577 | 0.062178607 | kdm6ba            | ZDB-GENE-091005-1    | kdm6ba            |  |
| ENSDARG00000098105 | 23.36278017 | -0.557001131 | 0.188565615 | -2.953884943 | 0.00313801  | 0.062427242 | tmem106c          | ZDB-GENE-061013-562  | tmem106c          |  |
| ENSDARG00000089967 | 15.58612377 | -0.900605772 | 0.305132496 | -2.951523627 | 0.003162104 | 0.062847549 | si:ch211-59o9.10  | ZDB-GENE-101206-1    | si:ch211-59o9.10  |  |
| ENSDARG00000053896 | 2.793701099 | -1.799486549 | 0.610153958 | -2.94923359  | 0.003185631 | 0.063231    | slc30a1b          | ZDB-GENE-070424-43   | slc30a1b          |  |
| ENSDARG00000061081 | 116.0475529 | -0.598159935 | 0.20283034  | -2.949065392 | 0.003187365 | 0.063231    | arpp21            | ZDB-GENE-081104-296  | arpp21            |  |
| ENSDARG00000098103 | 134.5789462 | -0.460503026 | 0.156225993 | -2.947672254 | 0.003201763 | 0.06338729  | tefb              | ZDB-GENE-050522-224  | tefb              |  |
| ENSDARG00000091211 | 2687.150625 | 0.467999953  | 0.158777095 | 2.94752812   | 0.003203256 | 0.06338729  | adh8a             | ZDB-GENE-030529-3    | adh8a             |  |
| ENSDARG00000061660 | 43.69829957 | -0.63891035  | 0.216768243 | -2.947435205 | 0.003204219 | 0.06338729  | CABZ01055347.1    |                      |                   |  |

|                    |             |              |             |              |             |             |                   |                      |                   |  |
|--------------------|-------------|--------------|-------------|--------------|-------------|-------------|-------------------|----------------------|-------------------|--|
| ENSDARG0000007737  | 52.61798126 | -0.431652297 | 0.146535589 | -2.945716456 | 0.003222076 | 0.06362934  | zyg11             | ZDB-GENE-041014-17   | zyg11             |  |
| ENSDARG00000099743 | 21.30227632 | -0.539566704 | 0.183172237 | -2.945679507 | 0.003222461 | 0.06362934  | zgc:113019        | ZDB-GENE-050417-449  | zgc:113019        |  |
| ENSDARG00000071601 | 332.2894301 | 0.698099418  | 0.237079284 | 2.944582114  | 0.003233911 | 0.063746808 | pvalb9            | ZDB-GENE-030805-4    | pvalb9            |  |
| ENSDARG00000016868 | 45.6142404  | -0.646951242 | 0.219712704 | -2.944532701 | 0.003234428 | 0.063746808 | rhobtb4           | ZDB-GENE-060315-11   | rhobtb4           |  |
| ENSDARG00000076891 | 92.56515605 | -0.374436143 | 0.127189675 | -2.943919339 | 0.003240845 | 0.063813915 | rfxap             | ZDB-GENE-091204-321  | rfxap             |  |
| ENSDARG00000103542 | 47.5600161  | 0.602456021  | 0.204667436 | 2.943585128  | 0.003244346 | 0.063823543 | vegfaa            | ZDB-GENE-990415-273  | vegfaa            |  |
| ENSDARG00000020596 | 56.79634056 | -0.397042174 | 0.134970618 | -2.94169338  | 0.00326423  | 0.064155132 | miga1             | ZDB-GENE-041010-193  | miga1             |  |
| ENSDARG00000097613 | 37.21749671 | -1.154646193 | 0.392812717 | -2.939431805 | 0.003288146 | 0.064565295 | igfn1.3           | ZDB-GENE-131122-44   | igfn1.3           |  |
| ENSDARG00000036171 | 222.8250503 | -0.714112399 | 0.243196551 | -2.936359073 | 0.003320897 | 0.065147999 | rnasel3           | ZDB-GENE-050809-5    | rnasel3           |  |
| ENSDARG00000101312 | 84.34190224 | 0.459876333  | 0.156680381 | 2.935123908  | 0.003334145 | 0.065296704 | si:dkey-31n13.4   | ZDB-GENE-071008-3    | si:dkey-31n13.4   |  |
| ENSDARG00000077245 | 28.32391893 | 0.764696099  | 0.26053691  | 2.935077792  | 0.003334641 | 0.065296704 | si:dkey-225n22.4  | ZDB-GENE-120709-30   | si:dkey-225n22.4  |  |
| ENSDARG00000099999 | 198.204042  | 0.24949739   | 0.085016959 | 2.934677895  | 0.003338941 | 0.065320538 | tcf3b             | ZDB-GENE-051113-64   | tcf3b             |  |
| ENSDARG00000026500 | 18.10558618 | -0.842102759 | 0.287140457 | -2.932720693 | 0.00336006  | 0.065673059 | xkr9              | ZDB-GENE-060421-6224 | xkr9              |  |
| ENSDARG00000025275 | 3.293616513 | -1.750086518 | 0.597234449 | -2.930317432 | 0.003386159 | 0.06610713  | gbgt111           | ZDB-GENE-040426-1117 | gbgt111           |  |
| ENSDARG00000101715 | 10.67613268 | -1.201067013 | 0.409906233 | -2.930101856 | 0.003388509 | 0.06610713  | arsg              | ZDB-GENE-060503-154  | arsg              |  |
| ENSDARG00000019304 | 4.787111318 | -1.206287137 | 0.411888094 | -2.928676877 | 0.003404081 | 0.066349828 | phactr3b          | ZDB-GENE-050522-156  | phactr3b          |  |
| ENSDARG00000033182 | 83.66549514 | -0.508828887 | 0.173796937 | -2.927720689 | 0.003414566 | 0.066491471 | arl4ab            | ZDB-GENE-030219-167  | arl4ab            |  |
| ENSDARG00000004460 | 15.61122614 | -0.794251542 | 0.271312449 | -2.927442309 | 0.003417625 | 0.066491471 | desi2             | ZDB-GENE-040801-39   | desi2             |  |
| ENSDARG00000076223 | 604.6897622 | 0.399806294  | 0.136598364 | 2.926874682  | 0.003423868 | 0.066551829 | SERP1             | ZDB-GENE-040718-312  | zgc:92744         |  |
| ENSDARG00000062968 | 270.1995576 | 0.215797515  | 0.073742195 | 2.926377686  | 0.003429343 | 0.066597155 | sbf1              | ZDB-GENE-040718-139  | sbf1              |  |
| ENSDARG00000016391 | 16.12619533 | -1.176592252 | 0.402163071 | -2.925659605 | 0.003437268 | 0.066681459 | calcoco1b         | ZDB-GENE-031118-126  | calcoco1b         |  |
| ENSDARG00000105258 | 6.507211748 | -0.906716043 | 0.309944489 | -2.925414309 | 0.003439979 | 0.066681459 | cep72             | ZDB-GENE-101115-1    | cep72             |  |
| ENSDARG00000044956 | 1.741988917 | -5.757752914 | 1.969074014 | -2.924091667 | 0.00345463  | 0.066859045 | zgc:114123        | ZDB-GENE-050913-53   | zgc:114123        |  |
| ENSDARG00000062788 | 33.96279158 | 2.002287416  | 0.684772687 | 2.92401764   | 0.003455452 | 0.066859045 | irg1l             | ZDB-GENE-061103-301  | irg1l             |  |
| ENSDARG00000098874 | 77.37459745 | -0.310833145 | 0.106361407 | -2.922424157 | 0.003473182 | 0.067098766 | exoc6b            | ZDB-GENE-060929-132  | exoc6b            |  |
| ENSDARG00000076848 | 107.3876057 | 0.85265514   | 0.2917935   | 2.922118344  | 0.003476594 | 0.067098766 | zgc:112492        | ZDB-GENE-050417-143  | zgc:112492        |  |
| ENSDARG00000075833 | 9.04494649  | -1.052096606 | 0.360054112 | -2.922051354 | 0.003477342 | 0.067098766 | lyve1a            | ZDB-GENE-031118-138  | lyve1a            |  |
| ENSDARG00000043009 | 158.7153387 | -0.377605375 | 0.129256086 | -2.921374058 | 0.003484911 | 0.067144658 | fam43a            | ZDB-GENE-030131-6098 | fam43a            |  |
| ENSDARG00000004979 | 469.8508636 | 0.685616246  | 0.234707397 | 2.921153128  | 0.003487384 | 0.067144658 | elovl5            | ZDB-GENE-040407-2    | elovl5            |  |
| ENSDARG00000029439 | 502.3878209 | -0.65240939  | 0.223352267 | -2.920988437 | 0.003489228 | 0.067144658 | atp2a2a           | ZDB-GENE-040426-702  | atp2a2a           |  |
| ENSDARG00000105499 | 8.933914054 | -7.378937076 | 2.527789452 | -2.919126461 | 0.003510138 | 0.067485747 | zgc:175135        | ZDB-GENE-080214-1    | zgc:175135        |  |
| ENSDARG00000052375 | 1.851318015 | -2.059985067 | 0.705853368 | -2.918432016 | 0.003517966 | 0.067574924 | zgc:66455         | ZDB-GENE-040426-1642 | zgc:66455         |  |
| ENSDARG00000039067 | 1.186451922 | -2.425537308 | 0.831295222 | -2.917780885 | 0.00352532  | 0.067654847 | srd5a2b           | ZDB-GENE-050417-182  | srd5a2b           |  |
| ENSDARG00000008310 | 118.5000613 | -0.344365525 | 0.11804252  | -2.917300698 | 0.003530752 | 0.067697778 | ip6k2a            | ZDB-GENE-030131-760  | ip6k2a            |  |
| ENSDARG00000074201 | 1326.994354 | -0.300750083 | 0.103185659 | -2.914650028 | 0.003560876 | 0.068213636 | flna              | ZDB-GENE-030131-2145 | flna              |  |
| ENSDARG00000059035 | 2149.101813 | -0.379745922 | 0.130332835 | -2.913662709 | 0.003572156 | 0.068356505 | porb              | ZDB-GENE-030131-5767 | porb              |  |
| ENSDARG00000011000 | 125.0668467 | -0.377979184 | 0.129736706 | -2.913432881 | 0.003574787 | 0.068356505 | gtf2a1            | ZDB-GENE-030131-2694 | gtf2a1            |  |
| ENSDARG00000101914 | 70.88059583 | 0.413084721  | 0.141853818 | 2.912045131  | 0.003590708 | 0.068599026 | metrnla           | ZDB-GENE-040426-1917 | metrnla           |  |
| ENSDARG00000059369 | 15.02781265 | -1.107487269 | 0.380478709 | -2.910773308 | 0.003605355 | 0.068816806 | si:ch1073-15f12.3 | ZDB-GENE-081104-69   | si:ch1073-15f12.3 |  |
| ENSDARG00000087018 | 3.426178208 | 1.627768375  | 0.559306546 | 2.910333136  | 0.003610437 | 0.068851781 | FO704748.1        |                      |                   |  |
| ENSDARG00000019342 | 44.07070677 | -0.477403558 | 0.164109231 | -2.909059746 | 0.003625176 | 0.068963851 | chrnd             | ZDB-GENE-030131-6665 | chrnd             |  |
| ENSDARG00000087446 | 19.50550733 | -0.716626345 | 0.246346335 | -2.909019711 | 0.00362564  | 0.068963851 | mmd2a             | ZDB-GENE-081104-52   | mmd2a             |  |
| ENSDARG00000042332 | 127.0772278 | 1.125269664  | 0.386825945 | 2.908981882  | 0.003626079 | 0.068963851 | plin2             | ZDB-GENE-050913-12   | plin2             |  |
| ENSDARG00000005220 | 87.31308343 | 0.341753213  | 0.117502283 | 2.908481481  | 0.003631887 | 0.069012365 | pdc6              | ZDB-GENE-040426-1307 | pdc6              |  |
| ENSDARG00000052470 | 316.8740193 | -0.416425721 | 0.143192569 | -2.908151756 | 0.003635719 | 0.06902327  | igfbp2a           | ZDB-GENE-000125-12   | igfbp2a           |  |
| ENSDARG00000074248 | 15.0397035  | -0.730373332 | 0.251205361 | -2.907475097 | 0.003643594 | 0.069110847 | tmem237b          | ZDB-GENE-040912-63   | tmem237b          |  |
| ENSDARG00000103066 | 1.723462182 | -3.109883578 | 1.06998648  | -2.906469977 | 0.00365532  | 0.069271252 | smx5              | ZDB-GENE-000616-10   | smx5              |  |
| ENSDARG00000103286 | 10.42773856 | -0.90715388  | 0.312180353 | -2.905864741 | 0.003662397 | 0.069343352 | kcnk4a            | ZDB-GENE-141211-80   | kcnk4a            |  |
| ENSDARG00000015343 | 600.8938549 | 0.877918052  | 0.302222696 | 2.904871353  | 0.003674041 | 0.069473414 | pgd               | ZDB-GENE-040426-2807 | pgd               |  |

|                    |             |              |             |              |             |             |                    |                      |                    |  |
|--------------------|-------------|--------------|-------------|--------------|-------------|-------------|--------------------|----------------------|--------------------|--|
| ENSDARG0000060374  | 14.87791747 | -0.760987743 | 0.262004679 | -2.904481502 | 0.003678619 | 0.069473414 | ttl11              | ZDB-GENE-061013-747  | ttl11              |  |
| ENSDARG0000023814  | 101.2731683 | 0.325712192  | 0.112145828 | 2.904362984  | 0.003680012 | 0.069473414 | dyrk1ab            | ZDB-GENE-030131-5677 | dyrk1ab            |  |
| ENSDARG0000077836  | 10.48042326 | -0.76692241  | 0.264077062 | -2.904161399 | 0.003682383 | 0.069473414 | ttc22              | ZDB-GENE-050208-292  | ttc22              |  |
| ENSDARG0000041787  | 662.8261113 | -0.43815366  | 0.150960968 | -2.902430126 | 0.003702798 | 0.069796416 | cx32.3             | ZDB-GENE-030131-1337 | cx32.3             |  |
| ENSDARG0000007421  | 253.5873755 | -0.583645506 | 0.201128661 | -2.9018515   | 0.003709643 | 0.069863303 | ftcd               | ZDB-GENE-030131-9643 | ftcd               |  |
| ENSDARG0000011956  | 5.93821716  | -1.155840551 | 0.398370433 | -2.901421526 | 0.003714738 | 0.069897119 | dlx4a              | ZDB-GENE-980526-73   | dlx4a              |  |
| ENSDARG0000105104  | 8.161363741 | -1.300446329 | 0.448319322 | -2.900714433 | 0.00372313  | 0.069968716 | si:dkey-223p19.1   | ZDB-GENE-120215-140  | si:dkey-223p19.1   |  |
| ENSDARG0000005652  | 28.68375933 | -0.524052249 | 0.180673742 | -2.900544613 | 0.003725148 | 0.069968716 | aclyb              | ZDB-GENE-090909-2    | aclyb              |  |
| ENSDARG00000054534 | 159.2820626 | 0.689347027  | 0.237699587 | 2.900076675  | 0.003730714 | 0.070011191 | ACOT12             |                      |                    |  |
| ENSDARG0000004078  | 515.880677  | 0.446290935  | 0.153945876 | 2.899011963  | 0.003743406 | 0.070187208 | acsl4a             | ZDB-GENE-040426-1565 | acsl4a             |  |
| ENSDARG00000103164 | 2.250020557 | -1.866319698 | 0.643937384 | -2.898293756 | 0.00375199  | 0.07028595  | zgc:194948         | ZDB-GENE-081022-167  | zgc:194948         |  |
| ENSDARG00000079345 | 64.74339167 | 0.723556666  | 0.249770058 | 2.896891137  | 0.003768805 | 0.070485934 | si:ch211-217k17.10 | ZDB-GENE-030131-8827 | si:ch211-217k17.10 |  |
| ENSDARG00000114405 | 2.622239973 | 1.863217404  | 0.64318776  | 2.896848355  | 0.003769319 | 0.070485934 | zgc:194989         | ZDB-GENE-080723-3    | zgc:194989         |  |
| ENSDARG00000020718 | 92.36068358 | 0.589754247  | 0.203621291 | 2.896328989  | 0.003775564 | 0.070540446 | slc25a22a          | ZDB-GENE-110408-61   | slc25a22a          |  |
| ENSDARG00000041294 | 44.08006646 | 0.667552006  | 0.230528736 | 2.895743142  | 0.003782619 | 0.070604985 | noxo1a             | ZDB-GENE-030131-9700 | noxo1a             |  |
| ENSDARG00000028173 | 100.8387394 | -0.541313406 | 0.1869506   | -2.895489007 | 0.003785683 | 0.070604985 | slc4a2a            | ZDB-GENE-051101-2    | slc4a2a            |  |
| ENSDARG00000071213 | 14.58127186 | -0.722452839 | 0.2495762   | -2.894718477 | 0.003794987 | 0.070716265 | rgl3a              | ZDB-GENE-101130-1    | rgl3a              |  |
| ENSDARG00000052731 | 13.88585863 | -1.068139253 | 0.369083002 | -2.894035342 | 0.003803254 | 0.070808025 | ankrd31            | ZDB-GENE-050417-473  | ankrd31            |  |
| ENSDARG00000056619 | 38.63237082 | 0.44038979   | 0.152241719 | 2.892701109  | 0.003819446 | 0.071047056 | arhgap42a          | ZDB-GENE-030131-8077 | arhgap42a          |  |
| ENSDARG00000077082 | 51.53483641 | 0.558059444  | 0.192976518 | 2.891851556  | 0.003829789 | 0.071128495 | agtrap             | ZDB-GENE-050309-11   | agtrap             |  |
| ENSDARG00000020284 | 19.81584992 | 0.673753369  | 0.232988341 | 2.891790057  | 0.003830538 | 0.071128495 | si:ch211-278j3.3   | ZDB-GENE-041014-147  | si:ch211-278j3.3   |  |
| ENSDARG00000008255 | 190.5396774 | -0.325082138 | 0.112441736 | -2.891116309 | 0.00383876  | 0.071203247 | cnot6a             | ZDB-GENE-030131-2768 | cnot6a             |  |
| ENSDARG00000017034 | 84.17445575 | 0.390115616  | 0.134952061 | 2.890771825  | 0.00384297  | 0.071203247 | sqor               | ZDB-GENE-050417-436  | sqor               |  |
| ENSDARG00000039929 | 899.6387279 | -0.487925028 | 0.168795113 | -2.890634808 | 0.003844646 | 0.071203247 | ckmt2b             | ZDB-GENE-040426-1654 | ckmt2b             |  |
| ENSDARG00000044642 | 501.2472026 | 0.811603324  | 0.281081824 | 2.887427276  | 0.003884064 | 0.071870446 | sc5d               | ZDB-GENE-040912-56   | sc5d               |  |
| ENSDARG00000069266 | 71.6789942  | 0.576081924  | 0.199540244 | 2.887046302  | 0.00388877  | 0.071894738 | esrra              | ZDB-GENE-990415-68   | esrra              |  |
| ENSDARG00000018600 | 500.2102185 | 0.463526186  | 0.160640667 | 2.885484695  | 0.003908115 | 0.072127767 | retsat             | ZDB-GENE-050320-11   | retsat             |  |
| ENSDARG00000055284 | 47.92632675 | 0.442615708  | 0.153414359 | 2.885099621  | 0.003912898 | 0.072127767 | afap1              | ZDB-GENE-100316-6    | afap1              |  |
| ENSDARG00000096888 | 54.86432249 | -1.220465858 | 0.423033863 | -2.885031116 | 0.00391375  | 0.072127767 | serpinb14          | ZDB-GENE-030131-7169 | serpinb14          |  |
| ENSDARG00000005913 | 30.97228314 | -4.479336012 | 1.55275501  | -2.884766742 | 0.003917038 | 0.072127767 | tgm1l3             | ZDB-GENE-120718-1    | tgm1l3             |  |
| ENSDARG00000061496 | 2.102834592 | -1.926430834 | 0.66781959  | -2.884657567 | 0.003918396 | 0.072127767 | si:ch211-250e5.2   | ZDB-GENE-030131-8384 | si:ch211-250e5.2   |  |
| ENSDARG00000077301 | 197.3617269 | -0.53707315  | 0.186216857 | -2.884127461 | 0.003924999 | 0.072137611 | mlf1               | ZDB-GENE-080917-7    | mlf1               |  |
| ENSDARG00000105782 | 5.42648226  | -1.173755142 | 0.406988526 | -2.884000576 | 0.00392658  | 0.072137611 | CABZ01081777.1     |                      |                    |  |
| ENSDARG00000076779 | 475.7810483 | -0.355723721 | 0.123352641 | -2.883794925 | 0.003929145 | 0.072137611 | fam13b             | ZDB-GENE-030131-4913 | fam13b             |  |
| ENSDARG00000009299 | 83.46953219 | 0.455222973  | 0.157954658 | 2.881985113  | 0.003951784 | 0.072479442 | dusp8a             | ZDB-GENE-040426-1842 | dusp8a             |  |
| ENSDARG00000099124 | 13.66770688 | -0.87415709  | 0.303354242 | -2.881637926 | 0.00395614  | 0.072479442 | f3a                | ZDB-GENE-071119-5    | f3a                |  |
| ENSDARG00000068973 | 81.95440171 | 0.347157411  | 0.120478533 | 2.8814877    | 0.003958027 | 0.072479442 | pdlim4             | ZDB-GENE-070308-5    | pdlim4             |  |
| ENSDARG00000101051 | 901.2409986 | 0.682348324  | 0.236919343 | 2.880087012  | 0.003975654 | 0.072716713 | ctsbb              | ZDB-GENE-070323-1    | ctsbb              |  |
| ENSDARG00000022410 | 371.5056448 | -0.34007169  | 0.118084012 | -2.879913077 | 0.003977848 | 0.072716713 | rrp12              | ZDB-GENE-050706-182  | rrp12              |  |
| ENSDARG00000104687 | 28.92225509 | 0.808197339  | 0.280826512 | 2.877923926  | 0.004003017 | 0.073101964 | slc16a9b           | ZDB-GENE-040801-69   | slc16a9b           |  |
| ENSDARG00000012060 | 22.23008281 | 0.66178816   | 0.229970989 | 2.877702799  | 0.004005823 | 0.073101964 | thbs3b             | ZDB-GENE-060503-84   | thbs3b             |  |
| ENSDARG00000079175 | 272.8376515 | 0.488677887  | 0.169893148 | 2.876383736  | 0.004022604 | 0.07327899  | si:ch211-79k12.1   | ZDB-GENE-080303-9    | si:ch211-79k12.1   |  |
| ENSDARG00000056729 | 1.210067166 | 2.87556619   | 0.999797648 | 2.876148184  | 0.004025607 | 0.07327899  | her4.2             | ZDB-GENE-060815-1    | her4.2             |  |
| ENSDARG00000093477 | 8.664113432 | 1.472462221  | 0.511960407 | 2.876125188  | 0.0040259   | 0.07327899  | CYP46A1            | ZDB-GENE-051120-33   | zgc:123299         |  |
| ENSDARG00000093477 | 8.664113432 | 1.472462221  | 0.511960407 | 2.876125188  | 0.0040259   | 0.07327899  | CYP46A1            | ZDB-GENE-050522-464  | cyp46a1.1          |  |
| ENSDARG00000073961 | 3.342613513 | -1.727752697 | 0.60097391  | -2.874921304 | 0.004041282 | 0.073495832 | si:ch211-160j14.2  | ZDB-GENE-091118-113  | si:ch211-160j14.2  |  |
| ENSDARG00000076563 | 167.7019534 | 0.501527771  | 0.174526215 | 2.873652944  | 0.004057546 | 0.073728319 | rarrres3l          | ZDB-GENE-040718-368  | rarrres3l          |  |
| ENSDARG00000087187 | 5.23822879  | -1.453332208 | 0.506026061 | -2.872050117 | 0.004078183 | 0.07398428  | grip2a             | ZDB-GENE-081104-132  | grip2a             |  |
| ENSDARG00000023040 | 39.89850328 | 0.417659007  | 0.145423607 | 2.872016548  | 0.004078616 | 0.07398428  | zbtb1              | ZDB-GENE-041001-126  | zbtb1              |  |



|                    |             |              |             |              |             |             |                    |                      |                    |  |
|--------------------|-------------|--------------|-------------|--------------|-------------|-------------|--------------------|----------------------|--------------------|--|
| ENSDARG0000004697  | 70.89527645 | -0.696245918 | 0.242657789 | -2.869250232 | 0.004114461 | 0.074570655 | rxrgb              | ZDB-GENE-040718-34   | rxrgb              |  |
| ENSDARG00000045064 | 472.8096663 | -0.344408727 | 0.120158195 | -2.866294107 | 0.004153082 | 0.075206283 | ablim1b            | ZDB-GENE-050327-91   | ablim1b            |  |
| ENSDARG00000057062 | 13.13337323 | 0.765754475  | 0.267188059 | 2.865975669  | 0.004157262 | 0.075217685 | si:dkey-157g16.6   | ZDB-GENE-090313-189  | si:dkey-157g16.6   |  |
| ENSDARG00000056259 | 401.4234317 | -0.27813297  | 0.097073114 | -2.865190569 | 0.004167584 | 0.075295656 | tmem131            | ZDB-GENE-130530-662  | tmem131            |  |
| ENSDARG00000071586 | 574.1112917 | 0.357152205  | 0.124671398 | 2.864748542  | 0.004173405 | 0.075295656 | tgfbi              | ZDB-GENE-030131-73   | tgfbi              |  |
| ENSDARG00000071495 | 55.68858541 | 0.836449233  | 0.2920043   | 2.86450998   | 0.00417655  | 0.075295656 | sult3st5           | ZDB-GENE-060503-722  | sult3st5           |  |
| ENSDARG00000010925 | 15.00629811 | 0.765556524  | 0.267258189 | 2.864482948  | 0.004176906 | 0.075295656 | HTRA3              |                      |                    |  |
| ENSDARG00000056767 | 58.53739491 | -0.442804445 | 0.154594382 | -2.864298421 | 0.004179341 | 0.075295656 | itgb3a             | ZDB-GENE-071207-1    | itgb3a             |  |
| ENSDARG00000103176 | 1.985226834 | -1.966005637 | 0.686607276 | -2.863362661 | 0.004191705 | 0.075454249 | nr5a1a             | ZDB-GENE-010504-1    | nr5a1a             |  |
| ENSDARG00000051836 | 40.0007376  | -0.542413676 | 0.189503742 | -2.862284769 | 0.004205988 | 0.07564709  | si:dkeyp-19e1.3    | ZDB-GENE-081104-56   | si:dkeyp-19e1.3    |  |
| ENSDARG00000068503 | 17.9541891  | -0.776299715 | 0.271505726 | -2.859238828 | 0.004246589 | 0.076312544 | gbgt1l4            | ZDB-GENE-031204-4    | gbgt1l4            |  |
| ENSDARG00000087369 | 15.01237492 | -0.641648932 | 0.224435241 | -2.858949106 | 0.00425047  | 0.076317544 | cep162             | ZDB-GENE-100922-266  | cep162             |  |
| ENSDARG00000044062 | 70.48897487 | 0.370092057  | 0.129467591 | 2.858569122  | 0.004255564 | 0.076344311 | ctbp2a             | ZDB-GENE-010130-2    | ctbp2a             |  |
| ENSDARG00000020000 | 35.05787431 | 0.502352055  | 0.175768581 | 2.858031015  | 0.004262787 | 0.076382221 | sh3bp4a            | ZDB-GENE-040303-3    | sh3bp4a            |  |
| ENSDARG00000078620 | 18.10954553 | 0.915769878  | 0.320437376 | 2.857874726  | 0.004264887 | 0.076382221 | si:dkey-156m2.3    | ZDB-GENE-121213-8    | si:dkey-156m2.3    |  |
| ENSDARG00000076533 | 103.9223739 | 0.365657383  | 0.127959705 | 2.857597882  | 0.00426861  | 0.076384317 | nfe2l1b            | ZDB-GENE-120319-2    | nfe2l1b            |  |
| ENSDARG00000090980 | 18.48450656 | -0.827111913 | 0.289483435 | -2.85719946  | 0.004273972 | 0.076415728 | apof               | ZDB-GENE-031204-36   | apof               |  |
| ENSDARG00000028048 | 27.28951367 | 0.491941094  | 0.172210593 | 2.856625053  | 0.004281713 | 0.07648959  | rdh8a              | ZDB-GENE-021115-3    | rdh8a              |  |
| ENSDARG00000020645 | 132.314852  | -0.559560174 | 0.195954487 | -2.855561942 | 0.004296074 | 0.076681486 | slc7a3a            | ZDB-GENE-041114-206  | slc7a3a            |  |
| ENSDARG00000020953 | 62.13856971 | -0.437880769 | 0.15343566  | -2.853839638 | 0.004319433 | 0.077033522 | dnajb6b            | ZDB-GENE-040426-1122 | dnajb6b            |  |
| ENSDARG00000012078 | 217.6691294 | 0.227687435  | 0.079798468 | 2.853280795  | 0.004327037 | 0.077078773 | meis1b             | ZDB-GENE-020122-1    | meis1b             |  |
| ENSDARG00000055591 | 76.68943826 | 0.644033024  | 0.225729497 | 2.853118591  | 0.004329246 | 0.077078773 | pipox              | ZDB-GENE-110627-2    | pipox              |  |
| ENSDARG00000103364 | 1085.705287 | -0.22673239  | 0.07947848  | -2.852751952 | 0.004334244 | 0.077102959 | cs                 | ZDB-GENE-030131-1058 | cs                 |  |
| ENSDARG00000002071 | 124.890102  | -0.43155626  | 0.151316615 | -2.852008418 | 0.004344395 | 0.077218706 | adss               | ZDB-GENE-050417-337  | adss               |  |
| ENSDARG00000094392 | 32.88691462 | -5.999009696 | 2.104760076 | -2.850210703 | 0.004369028 | 0.077496514 | si:dkey-229d11.5   | ZDB-GENE-030131-5342 | si:dkey-229d11.5   |  |
| ENSDARG00000023185 | 32.30890158 | -0.479138168 | 0.168140937 | -2.849622331 | 0.004377117 | 0.077496514 | si:rp71-1g18.13    | ZDB-GENE-040724-111  | si:rp71-1g18.13    |  |
| ENSDARG00000086739 | 11.972776   | -2.466428812 | 0.865552469 | -2.849542805 | 0.004378211 | 0.077496514 | si:ch1073-513e17.1 | ZDB-GENE-030131-7188 | si:ch1073-513e17.1 |  |
| ENSDARG00000026634 | 135.721499  | 0.342249691  | 0.120109944 | 2.849470076  | 0.004379213 | 0.077496514 | ehmt1b             | ZDB-GENE-080515-3    | ehmt1b             |  |
| ENSDARG00000022614 | 2.649331386 | -2.679169315 | 0.940256668 | -2.849402091 | 0.004380149 | 0.077496514 | ddx43              | ZDB-GENE-080204-77   | ddx43              |  |
| ENSDARG00000016483 | 165.8811691 | 0.4181942    | 0.146772415 | 2.849269739  | 0.004381971 | 0.077496514 | baiap2l2a          | ZDB-GENE-040108-10   | baiap2l2a          |  |
| ENSDARG00000096859 | 3.645522002 | -1.650543443 | 0.579510695 | -2.848167357 | 0.004397179 | 0.077638765 | si:ch211-286b4.4   | ZDB-GENE-131127-605  | si:ch211-286b4.4   |  |
| ENSDARG00000019208 | 9.701048629 | -1.063836154 | 0.373517584 | -2.84815548  | 0.004397344 | 0.077638765 | camsap1a           | ZDB-GENE-060518-4    | camsap1a           |  |
| ENSDARG00000036628 | 344.1066414 | 0.43831976   | 0.153926549 | 2.847590388  | 0.004405158 | 0.077711198 | cd74b              | ZDB-GENE-990910-10   | cd74b              |  |
| ENSDARG00000030006 | 31.81025172 | -0.528547499 | 0.185632277 | -2.847282306 | 0.004409424 | 0.077722519 | slc6a7             | ZDB-GENE-070112-1492 | slc6a7             |  |
| ENSDARG00000030125 | 19.57491713 | 0.772505628  | 0.271407455 | 2.846294801  | 0.004423123 | 0.077841342 | sox7               | ZDB-GENE-040109-4    | sox7               |  |
| ENSDARG00000044034 | 16.52428533 | -0.768732888 | 0.270084632 | -2.846266679 | 0.004423513 | 0.077841342 | tmem86a            | ZDB-GENE-050320-81   | tmem86a            |  |
| ENSDARG00000022183 | 78.93101766 | 0.601796008  | 0.211472816 | 2.845736959  | 0.004430878 | 0.077905852 | gsto1              | ZDB-GENE-040718-365  | gsto1              |  |
| ENSDARG00000039974 | 67.51163537 | 0.35892635   | 0.126139374 | 2.845474331  | 0.004434533 | 0.077905852 | rai14              | ZDB-GENE-040718-235  | rai14              |  |
| ENSDARG00000092033 | 40.82827238 | -0.786902052 | 0.276688801 | -2.84399675  | 0.00445515  | 0.078203205 | si:dkey-239h2.3    | ZDB-GENE-081104-383  | si:dkey-239h2.3    |  |
| ENSDARG00000096990 | 20.92223229 | 0.887918408  | 0.312343561 | 2.842762004  | 0.004472445 | 0.078386943 | si:ch1073-340i21.2 | ZDB-GENE-131121-430  | si:ch1073-340i21.2 |  |
| ENSDARG00000075405 | 48.94724774 | 0.547651598  | 0.192650474 | 2.842721261  | 0.004473017 | 0.078386943 | adck5              | ZDB-GENE-081104-149  | adck5              |  |
| ENSDARG00000093844 | 4462.054517 | -0.946335052 | 0.332967494 | -2.842124443 | 0.0044814   | 0.078468936 | zgc:136461         | ZDB-GENE-060519-7    | zgc:136461         |  |
| ENSDARG00000089717 | 33.43646641 | -0.651195357 | 0.229151743 | -2.841764807 | 0.004486458 | 0.078492631 | qpct               | ZDB-GENE-130827-1    | qpct               |  |
| ENSDARG00000044457 | 6.073340542 | 1.178661846  | 0.414913929 | 2.840738195  | 0.004500925 | 0.078504538 | gfi1ab             | ZDB-GENE-040116-8    | gfi1ab             |  |
| ENSDARG00000097019 | 27.74100244 | 0.747512233  | 0.26315689  | 2.840557332  | 0.004503478 | 0.078504538 | dhrs13b            | ZDB-GENE-040801-253  | dhrs13b            |  |
| ENSDARG00000087193 | 23.74465503 | -0.676293482 | 0.238094201 | -2.840444993 | 0.004505064 | 0.078504538 | prrg2              | ZDB-GENE-130625-1    | prrg2              |  |
| ENSDARG00000027495 | 1.052962738 | -2.926742661 | 1.030409189 | -2.840369334 | 0.004506133 | 0.078504538 | elovl4b            | ZDB-GENE-030131-7672 | elovl4b            |  |
| ENSDARG00000040380 | 98.20078475 | 0.311739387  | 0.109761168 | 2.840160985  | 0.004509077 | 0.078504538 | arhgef1a           | ZDB-GENE-030722-5    | arhgef1a           |  |
| ENSDARG00000071223 | 46.20858825 | -1.494342396 | 0.526177184 | -2.839998467 | 0.004511375 | 0.078504538 | zgc:158445         | ZDB-GENE-061215-78   | zgc:158445         |  |

|                    |             |              |             |              |             |             |                  |                      |                  |  |
|--------------------|-------------|--------------|-------------|--------------|-------------|-------------|------------------|----------------------|------------------|--|
| ENSDARG00000100136 | 17.32899584 | -0.661432614 | 0.232908792 | -2.839878261 | 0.004513075 | 0.078504538 | dcp1a            | ZDB-GENE-030723-5    | dcp1a            |  |
| ENSDARG0000024844  | 278.4427977 | -0.205946801 | 0.072612724 | -2.836235717 | 0.004564874 | 0.079296783 | max              | ZDB-GENE-990415-152  | max              |  |
| ENSDARG00000104210 | 62.20191045 | 0.408147982  | 0.143909187 | 2.836149586  | 0.004566105 | 0.079296783 | si:ch73-173h19.3 | ZDB-GENE-081104-245  | si:ch73-173h19.3 |  |
| ENSDARG0000002330  | 1.292463966 | -3.655969249 | 1.289484763 | -2.835217099 | 0.004579455 | 0.07946349  | lhx8a            | ZDB-GENE-031008-2    | lhx8a            |  |
| ENSDARG00000030632 | 143.3243705 | 0.336196211  | 0.118650046 | 2.833510998  | 0.004603972 | 0.079823537 | ccdc3b           | ZDB-GENE-050522-184  | ccdc3b           |  |
| ENSDARG00000101613 | 47.30131021 | -0.536885785 | 0.189522825 | -2.832829158 | 0.004613804 | 0.079928585 | si:dkey-238i5.2  | ZDB-GENE-030131-9718 | si:dkey-238i5.2  |  |
| ENSDARG00000098162 | 302.8257617 | 0.529949226  | 0.187137027 | 2.831877989  | 0.00462755  | 0.080101232 | zgc:77748        | ZDB-GENE-040426-1864 | zgc:77748        |  |
| ENSDARG00000018566 | 182.6244641 | -0.783224705 | 0.276649603 | -2.831107283 | 0.004638716 | 0.080134234 | flnca            | ZDB-GENE-070503-1    | flnca            |  |
| ENSDARG00000055240 | 483.6388588 | -0.435709499 | 0.153925546 | -2.83065099  | 0.004645338 | 0.080134234 | xdh              | ZDB-GENE-070719-9    | xdh              |  |
| ENSDARG00000069834 | 5.102893783 | -1.182026221 | 0.417608483 | -2.830465064 | 0.004648039 | 0.080134234 | pnpla4           | ZDB-GENE-070410-74   | pnpla4           |  |
| ENSDARG00000006639 | 37.6608341  | -0.497361564 | 0.175728103 | -2.830290403 | 0.004650577 | 0.080134234 | lnpk             | ZDB-GENE-030131-9455 | lnpk             |  |
| ENSDARG00000095453 | 8.638203809 | 1.093678242  | 0.386431754 | 2.830197649  | 0.004651926 | 0.080134234 | si:rp71-17i16.6  | ZDB-GENE-090313-410  | si:rp71-17i16.6  |  |
| ENSDARG00000100731 | 174.0861903 | -0.504901308 | 0.178398871 | -2.8301822   | 0.00465215  | 0.080134234 | zgc:101540       | ZDB-GENE-041212-67   | zgc:101540       |  |
| ENSDARG00000001950 | 1128.068685 | -0.391523928 | 0.138364915 | -2.829647437 | 0.004659932 | 0.080203076 | ak1              | ZDB-GENE-040822-37   | ak1              |  |
| ENSDARG00000044485 | 3.821111697 | -1.980374341 | 0.700067353 | -2.828834015 | 0.004671792 | 0.080341933 | sall4            | ZDB-GENE-060328-2    | sall4            |  |
| ENSDARG00000002831 | 5.34075412  | -1.69993775  | 0.601259231 | -2.827295886 | 0.004694293 | 0.080663413 | col4a4           | ZDB-GENE-101001-1    | col4a4           |  |
| ENSDARG00000098622 | 13.0291191  | -0.867965304 | 0.307048396 | -2.826802927 | 0.004701525 | 0.080722216 | ccne1            | ZDB-GENE-980526-168  | ccne1            |  |
| ENSDARG00000088967 | 68.72253742 | -0.527288025 | 0.186617632 | -2.825499496 | 0.004720696 | 0.080895724 | wnk4b            | ZDB-GENE-131120-119  | wnk4b            |  |
| ENSDARG00000074623 | 11.74353669 | -0.878048503 | 0.310773563 | -2.825364217 | 0.00472269  | 0.080895724 | tbc1d31          | ZDB-GENE-061218-4    | tbc1d31          |  |
| ENSDARG00000056324 | 32.56019212 | 0.776629569  | 0.274880293 | 2.825337392  | 0.004723085 | 0.080895724 | zgc:123295       | ZDB-GENE-051127-11   | zgc:123295       |  |
| ENSDARG00000024101 | 13.0996225  | -0.711603982 | 0.251903003 | -2.824912663 | 0.004729351 | 0.0809376   | adra1d           | ZDB-GENE-090312-203  | adra1d           |  |
| ENSDARG00000077237 | 87.34234328 | -0.544944212 | 0.192982548 | -2.823800473 | 0.004745792 | 0.081051897 | rfx7a            | ZDB-GENE-100309-3    | rfx7a            |  |
| ENSDARG00000103308 | 472.9915856 | -0.4805245   | 0.170172266 | -2.823753309 | 0.00474649  | 0.081051897 | mst1             | ZDB-GENE-020806-3    | mst1             |  |
| ENSDARG00000005454 | 60.60589329 | -0.679874852 | 0.240775765 | -2.823684737 | 0.004747506 | 0.081051897 | tacc3            | ZDB-GENE-050522-327  | tacc3            |  |
| ENSDARG00000038030 | 51.66691324 | 0.549498223  | 0.194625395 | 2.823363435  | 0.004752267 | 0.081067854 | rbx1             | ZDB-GENE-041008-106  | rbx1             |  |
| ENSDARG00000076856 | 31.64781698 | -0.55100044  | 0.195224603 | -2.82239242  | 0.004766681 | 0.081248329 | frem2a           | ZDB-GENE-081119-3    | frem2a           |  |
| ENSDARG00000088411 | 42.64807464 | -0.899598225 | 0.318810897 | -2.821729854 | 0.004776539 | 0.081286957 | notum2           | ZDB-GENE-120215-77   | notum2           |  |
| ENSDARG00000012141 | 116.4024987 | -0.369729834 | 0.131029747 | -2.821724402 | 0.004776621 | 0.081286957 | papolg           | ZDB-GENE-040426-1256 | papolg           |  |
| ENSDARG00000006497 | 833.329331  | 0.381962464  | 0.135386638 | 2.82127151   | 0.00478337  | 0.081336484 | rtn1a            | ZDB-GENE-030131-2426 | rtn1a            |  |
| ENSDARG00000033009 | 956.4998148 | 0.262318282  | 0.093002942 | 2.820537463  | 0.004794328 | 0.081440098 | h3f3b.1          | ZDB-GENE-050417-65   | h3f3b.1          |  |
| ENSDARG00000033009 | 956.4998148 | 0.262318282  | 0.093002942 | 2.820537463  | 0.004794328 | 0.081440098 | h3f3b.1          | ZDB-GENE-030131-8175 | h3f3c            |  |
| ENSDARG00000099819 | 616.3743753 | -0.49350252  | 0.174986732 | -2.820228226 | 0.00479895  | 0.081440098 | sb:cb1058        | ZDB-GENE-040108-9    | sb:cb1058        |  |
| ENSDARG00000058574 | 44.42284094 | -0.384136399 | 0.136222681 | -2.819915125 | 0.004803635 | 0.081440098 | abcg2c           | ZDB-GENE-050517-37   | abcg2c           |  |
| ENSDARG00000116806 | 229.9759762 | -0.529721136 | 0.187855384 | -2.819834729 | 0.004804839 | 0.081440098 | CU693479.1       |                      |                  |  |
| ENSDARG00000020212 | 109.5438186 | 0.644947918  | 0.228755427 | 2.819377568  | 0.004811688 | 0.081490999 | slc1a1           | ZDB-GENE-040718-414  | slc1a1           |  |
| ENSDARG00000077691 | 52.78013706 | -0.933503016 | 0.331421097 | -2.816667448 | 0.004852474 | 0.082079423 | slc13a5a         | ZDB-GENE-030131-4628 | slc13a5a         |  |
| ENSDARG00000018069 | 35.59143277 | 0.782592437  | 0.277861264 | 2.816486279  | 0.004855212 | 0.082079423 | rdh12            | ZDB-GENE-040718-9    | rdh12            |  |
| ENSDARG00000067670 | 27.04629096 | -0.557355121 | 0.197944404 | -2.815715472 | 0.004866875 | 0.082079423 | pomt1            | ZDB-GENE-060929-966  | pomt1            |  |
| ENSDARG00000021287 | 91.35240783 | 0.359347498  | 0.127629767 | 2.815546145  | 0.00486944  | 0.082079423 | rab7b            | ZDB-GENE-180906-1    | rab7b            |  |
| ENSDARG00000056378 | 578.9699757 | 0.536503254  | 0.190550519 | 2.815543392  | 0.004869482 | 0.082079423 | ifi30            | ZDB-GENE-030131-8447 | ifi30            |  |
| ENSDARG00000090844 | 23.68318271 | 0.552407543  | 0.196200158 | 2.815530565  | 0.004869676 | 0.082079423 | CABZ01054965.1   |                      |                  |  |
| ENSDARG00000079618 | 22.00599595 | 0.664803539  | 0.236171138 | 2.814922872  | 0.004878894 | 0.08216942  | sik2a            | ZDB-GENE-070705-451  | sik2a            |  |
| ENSDARG00000040338 | 63.0407475  | -0.395541944 | 0.140559391 | -2.814055617 | 0.004892076 | 0.08232599  | hvcn1            | ZDB-GENE-040718-36   | hvcn1            |  |
| ENSDARG00000074030 | 10.02388987 | -1.08517228  | 0.385694384 | -2.813554785 | 0.004899704 | 0.082388905 | myt1a            | ZDB-GENE-030131-3885 | myt1a            |  |
| ENSDARG00000054937 | 43.74539169 | -0.44348233  | 0.157704232 | -2.812114315 | 0.004921701 | 0.082639478 | badb             | ZDB-GENE-000616-1    | badb             |  |
| ENSDARG00000057241 | 56.33101744 | 0.572218012  | 0.203486533 | 2.812068217  | 0.004922406 | 0.082639478 | tnfsf10          | ZDB-GENE-040718-335  | tnfsf10          |  |
| ENSDARG00000027199 | 98.74804521 | 0.385434012  | 0.137107185 | 2.811187548  | 0.004935901 | 0.082735064 | smad1            | ZDB-GENE-991119-8    | smad1            |  |
| ENSDARG00000027249 | 1532.794341 | -0.521056841 | 0.185351189 | -2.811186942 | 0.00493591  | 0.082735064 | btg1             | ZDB-GENE-010726-1    | btg1             |  |
| ENSDARG00000071469 | 45.68979982 | 0.451217443  | 0.160557776 | 2.810311988  | 0.00494935  | 0.08289476  | znf618           | ZDB-GENE-030131-2063 | znf618           |  |

|                    |             |              |             |              |             |             |                      |                      |                   |  |
|--------------------|-------------|--------------|-------------|--------------|-------------|-------------|----------------------|----------------------|-------------------|--|
| ENSDARG0000026616  | 3.193567572 | -1.505051217 | 0.535754429 | -2.80921843  | 0.004966194 | 0.083111178 | zgc:113425           | ZDB-GENE-050320-128  | zgc:113425        |  |
| ENSDARG00000101351 | 6.910721477 | -1.021615038 | 0.364209414 | -2.805020953 | 0.005031331 | 0.084040402 | si:dkey-16p6.1       | ZDB-GENE-081103-43   | si:dkey-16p6.1    |  |
| ENSDARG00000076833 | 50.35683483 | -1.326645183 | 0.472970811 | -2.80491978  | 0.00503291  | 0.084040402 | atp1b1b              | ZDB-GENE-001127-4    | atp1b1b           |  |
| ENSDARG00000013025 | 46.26711413 | -0.501851668 | 0.178921259 | -2.80487445  | 0.005033618 | 0.084040402 | ints6                | ZDB-GENE-070906-1    | ints6             |  |
| ENSDARG00000036592 | 30.73426092 | -0.590685837 | 0.210635831 | -2.804298937 | 0.005042613 | 0.084080254 | setd4                | ZDB-GENE-050808-2    | setd4             |  |
| ENSDARG00000056725 | 305.5644085 | 0.450818362  | 0.160768948 | 2.804138279  | 0.005045126 | 0.084080254 | hmg3a                | ZDB-GENE-050428-1    | hmg3a             |  |
| ENSDARG00000018688 | 77.22128069 | 0.351539048  | 0.12537233  | 2.803960388  | 0.005047911 | 0.084080254 | elk3                 | ZDB-GENE-030716-2    | elk3              |  |
| ENSDARG00000056151 | 136.8035178 | 0.457247179  | 0.163113827 | 2.803239837  | 0.005059203 | 0.08420215  | tyrp1b               | ZDB-GENE-040718-249  | tyrp1b            |  |
| ENSDARG00000058372 | 2.97943568  | -1.722747819 | 0.614658113 | -2.802774068 | 0.005066515 | 0.084212075 | mcph1                | ZDB-GENE-060421-6122 | mcph1             |  |
| ENSDARG00000010610 | 21.54003487 | -0.656560039 | 0.234265985 | -2.802626416 | 0.005068835 | 0.084212075 | sarm1                | ZDB-GENE-040219-1    | sarm1             |  |
| ENSDARG00000076118 | 40.66290858 | -0.447364116 | 0.159633639 | -2.802442629 | 0.005071724 | 0.084212075 | cdip1                | ZDB-GENE-070720-18   | cdip1             |  |
| ENSDARG00000011299 | 68.54012037 | -0.400586812 | 0.143035469 | -2.800611731 | 0.005100585 | 0.084624971 | blzf1                | ZDB-GENE-010724-1    | blzf1             |  |
| ENSDARG00000041734 | 8.016349782 | -0.873827412 | 0.312071545 | -2.800086798 | 0.005108887 | 0.084696097 | tbc1d32              | ZDB-GENE-061106-5    | tbc1d32           |  |
| ENSDARG00000076765 | 28.13756448 | 0.595291024  | 0.212616435 | 2.799835415  | 0.005112867 | 0.084696097 | ddhd2                | ZDB-GENE-080519-4    | ddhd2             |  |
| ENSDARG00000102800 | 3.895100575 | 1.379903561  | 0.493048615 | 2.798717043  | 0.005130608 | 0.08492358  | CABZ01081752.2       |                      |                   |  |
| ENSDARG00000070396 | 2.595237549 | 1.628164051  | 0.581917648 | 2.797928635  | 0.005143147 | 0.085064688 | serpinb1l2           | ZDB-GENE-041001-117  | serpinb1l2        |  |
| ENSDARG00000016830 | 176.9492973 | 0.363103055  | 0.129905056 | 2.795141817  | 0.005187695 | 0.085611552 | rimkla               | ZDB-GENE-040912-20   | rimkla            |  |
| ENSDARG00000014208 | 2.041348788 | -4.369469227 | 1.563293827 | -2.795040288 | 0.005189325 | 0.085611552 | zgc:55413            | ZDB-GENE-040426-2909 | zgc:55413         |  |
| ENSDARG00000099776 | 551.4279428 | -0.61678061  | 0.220691581 | -2.794762753 | 0.005193782 | 0.085611552 | glula                | ZDB-GENE-030131-688  | glula             |  |
| ENSDARG00000078760 | 3.931888195 | -1.691174211 | 0.605127712 | -2.794739322 | 0.005194158 | 0.085611552 | cacna2d3             | ZDB-GENE-030616-133  | cacna2d3          |  |
| ENSDARG00000033251 | 115.7876308 | -0.351016297 | 0.125605255 | -2.794598826 | 0.005196416 | 0.085611552 | osbp3a               | ZDB-GENE-040912-77   | osbp3a            |  |
| ENSDARG00000086740 | 692.5823999 | 0.364221108  | 0.130408569 | 2.792923114  | 0.005223411 | 0.085989433 | phyh                 | ZDB-GENE-050417-361  | phyh              |  |
| ENSDARG00000099399 | 88.84030764 | 2.035061633  | 0.728832989 | 2.792219432  | 0.005234784 | 0.086109764 | thrsp                | ZDB-GENE-081022-19   | thrsp             |  |
| ENSDARG00000070427 | 76.01228961 | 0.56729838   | 0.203204241 | 2.791764466  | 0.00524215  | 0.086164027 | s100v1               | ZDB-GENE-080407-1    | s100v1            |  |
| ENSDARG00000099226 | 127.4200917 | 0.308864827  | 0.110653829 | 2.791271024  | 0.005250149 | 0.086186086 | CABZ01076667.1       |                      |                   |  |
| ENSDARG00000058270 | 78.46068305 | 0.565503014  | 0.202603572 | 2.791179879  | 0.005251628 | 0.086186086 | COLGALT1 (1 of many) | ZDB-GENE-070424-114  | si:ch211-114 13.7 |  |
| ENSDARG00000104538 | 209.6148713 | -0.468799292 | 0.168006881 | -2.790357689 | 0.005264984 | 0.086338403 | tmem184a             | ZDB-GENE-040426-2925 | tmem184a          |  |
| ENSDARG00000105063 | 5.77796398  | 1.498545079  | 0.537194645 | 2.78957561   | 0.005277717 | 0.086437483 | si:ch211-64i20.3     | ZDB-GENE-110913-55   | si:ch211-64i20.3  |  |
| ENSDARG00000040944 | 40.08330755 | -0.77713627  | 0.278619027 | -2.789243351 | 0.005283135 | 0.086437483 | ntd5                 | ZDB-GENE-031030-7    | ntd5              |  |
| ENSDARG00000026166 | 218.6320375 | 0.300613932  | 0.107776466 | 2.789235374  | 0.005283265 | 0.086437483 | emilin1b             | ZDB-GENE-060818-36   | emilin1b          |  |
| ENSDARG00000022650 | 160.7872232 | 0.337036701  | 0.120933458 | 2.786959923  | 0.005320506 | 0.086979597 | cyp2ad3              | ZDB-GENE-041001-156  | cyp2ad3           |  |
| ENSDARG00000097203 | 1.863124573 | -1.956861086 | 0.702294103 | -2.786384051 | 0.005329968 | 0.086998149 | si:ch211-176l24.4    | ZDB-GENE-131126-55   | si:ch211-176l24.4 |  |
| ENSDARG00000059931 | 13.82413088 | 0.790560448  | 0.283753913 | 2.786077699  | 0.005335008 | 0.086998149 | hyal2a               | ZDB-GENE-131121-41   | hyal2a            |  |
| ENSDARG00000005218 | 17.24360455 | -0.64673558  | 0.232137687 | -2.785999931 | 0.005336288 | 0.086998149 | wrnip1               | ZDB-GENE-040426-2415 | wrnip1            |  |
| ENSDARG00000077419 | 30.77329665 | -0.58680072  | 0.210651589 | -2.785645832 | 0.00534212  | 0.086998149 | nectin4a             | ZDB-GENE-160728-55   | nectin4a          |  |
| ENSDARG00000075687 | 39.34045166 | -0.552289602 | 0.198262899 | -2.78564272  | 0.005342172 | 0.086998149 | anapc1               | ZDB-GENE-081107-12   | anapc1            |  |
| ENSDARG00000070430 | 2.245068794 | -1.64359514  | 0.590136375 | -2.785110714 | 0.005350945 | 0.087074093 | chtopb               | ZDB-GENE-061013-712  | chtopb            |  |
| ENSDARG00000038802 | 3.691470878 | -1.444551714 | 0.518737691 | -2.784744081 | 0.005356999 | 0.087105701 | cenpl                | ZDB-GENE-040930-6    | cenpl             |  |
| ENSDARG00000036493 | 17.02698201 | -0.696176324 | 0.25002512  | -2.784425511 | 0.005362264 | 0.087124447 | si:ch73-174h16.4     | ZDB-GENE-160728-69   | si:ch73-174h16.4  |  |
| ENSDARG00000053625 | 406.0298    | 0.503822729  | 0.181043017 | 2.782889599  | 0.005387714 | 0.087470872 | anxa2b               | ZDB-GENE-030131-1089 | anxa2b            |  |
| ENSDARG00000029039 | 3.671651556 | -1.466474852 | 0.527257908 | -2.781323578 | 0.005413775 | 0.087814114 | zdhhc23a             | ZDB-GENE-060526-38   | zdhhc23a          |  |
| ENSDARG00000042213 | 6.538810301 | -1.368047253 | 0.491964888 | -2.780782299 | 0.005422809 | 0.087814114 | si:ch211-233h19.2    | ZDB-GENE-061009-14   | si:ch211-233h19.2 |  |
| ENSDARG00000059887 | 44.48171248 | -0.407268008 | 0.146459083 | -2.78076307  | 0.00542313  | 0.087814114 | eral1                | ZDB-GENE-060526-84   | eral1             |  |
| ENSDARG00000094346 | 6.337669371 | 2.620898415  | 0.942575483 | 2.780571384  | 0.005426333 | 0.087814114 | si:ch211-114l13.3    | ZDB-GENE-070424-112  | si:ch211-114l13.3 |  |
| ENSDARG00000069038 | 3.835907259 | -1.558633374 | 0.560583424 | -2.780377205 | 0.005429579 | 0.087814114 | si:ch211-242e8.1     | ZDB-GENE-060503-600  | si:ch211-242e8.1  |  |
| ENSDARG00000007906 | 392.8569227 | -1.518427363 | 0.54628442  | -2.779554581 | 0.00544335  | 0.087903762 | lrp2b                | ZDB-GENE-111115-1    | lrp2b             |  |
| ENSDARG00000078041 | 162.1256787 | 0.40911126   | 0.147186125 | 2.779550445  | 0.00544342  | 0.087903762 | xpo1a                | ZDB-GENE-050309-201  | xpo1a             |  |
| ENSDARG00000035821 | 172.5370994 | -0.357806995 | 0.128771829 | -2.778612346 | 0.005459163 | 0.088090853 | si:ch211-173p18.3    | ZDB-GENE-060503-672  | si:ch211-173p18.3 |  |
| ENSDARG00000101289 | 256.8881077 | -0.26740505  | 0.096272834 | -2.777575344 | 0.005476614 | 0.088305193 | slc29a1a             | ZDB-GENE-050913-138  | slc29a1a          |  |

|                    |             |              |             |              |             |             |                   |                      |                   |  |
|--------------------|-------------|--------------|-------------|--------------|-------------|-------------|-------------------|----------------------|-------------------|--|
| ENSDARG0000005891  | 180.675021  | 0.352122058  | 0.126821945 | 2.776507312  | 0.00549464  | 0.088528468 | cyb5r3            | ZDB-GENE-030131-3281 | cyb5r3            |  |
| ENSDARG0000005759  | 275.007359  | 0.499981076  | 0.180186047 | 2.774804615  | 0.005523488 | 0.088925639 | efhd2             | ZDB-GENE-060531-152  | efhd2             |  |
| ENSDARG00000092919 | 1.14857605  | -4.192280405 | 1.511037203 | -2.774438905 | 0.005529702 | 0.088958082 | zp3c              | ZDB-GENE-060817-5    | zp3c              |  |
| ENSDARG00000102267 | 24.43088993 | -0.702245751 | 0.253230763 | -2.773145503 | 0.005551729 | 0.089244678 | znf750            | ZDB-GENE-050417-313  | znf750            |  |
| ENSDARG00000071583 | 5.001501557 | -5.46333711  | 1.970799119 | -2.772143064 | 0.005568856 | 0.089452117 | gtf3ab            | ZDB-GENE-030131-7698 | gtf3ab            |  |
| ENSDARG00000042285 | 3.935638248 | -1.609910009 | 0.580883332 | -2.771485974 | 0.005580108 | 0.089512372 | atp8b3            | ZDB-GENE-050208-424  | atp8b3            |  |
| ENSDARG00000100952 | 634.3897454 | -0.645371536 | 0.232865846 | -2.771430618 | 0.005581056 | 0.089512372 | wu:fj16a03        | ZDB-GENE-030131-7415 | wu:fj16a03        |  |
| ENSDARG00000040245 | 708.0464015 | -0.330672251 | 0.119365305 | -2.770254315 | 0.005601254 | 0.089768356 | kpnb3             | ZDB-GENE-030424-2    | kpnb3             |  |
| ENSDARG00000020187 | 142.5742076 | 0.422741402  | 0.152646468 | 2.769414902  | 0.005615707 | 0.089931964 | GCA               | ZDB-GENE-040930-3    | zgc:92027         |  |
| ENSDARG00000043182 | 23.29443898 | -0.736107739 | 0.265850259 | -2.768881024 | 0.005624917 | 0.09001142  | hhla2a.1          | ZDB-GENE-050327-45   | hhla2a.1          |  |
| ENSDARG00000035715 | 431.238656  | 0.253754768  | 0.091709421 | 2.766943296  | 0.00565846  | 0.090479837 | marcksl1b         | ZDB-GENE-040426-2315 | marcksl1b         |  |
| ENSDARG00000105584 | 20.62256959 | -0.559240265 | 0.202162228 | -2.766293977 | 0.00566974  | 0.090552943 | slc8b1            | ZDB-GENE-130530-900  | slc8b1            |  |
| ENSDARG00000042539 | 477.3103328 | 0.282016659  | 0.101959878 | 2.76595719   | 0.005675599 | 0.090552943 | ywhaqa            | ZDB-GENE-040122-5    | ywhaqa            |  |
| ENSDARG00000058494 | 160.144847  | -0.309212494 | 0.111792812 | -2.765942537 | 0.005675854 | 0.090552943 | dnaja3a           | ZDB-GENE-030131-7837 | dnaja3a           |  |
| ENSDARG00000071325 | 9.939856602 | -0.91263194  | 0.330144913 | -2.764337428 | 0.005703852 | 0.090931164 | cbarpb            | ZDB-GENE-050208-507  | cbarpb            |  |
| ENSDARG00000074287 | 263.2366438 | 0.339892264  | 0.12301181  | 2.763086431  | 0.00572576  | 0.09120458  | sptlc2b           | ZDB-GENE-080305-8    | sptlc2b           |  |
| ENSDARG00000053101 | 119.6685119 | 0.368596039  | 0.133410711 | 2.762866916  | 0.005729612 | 0.09120458  | prpf38b           | ZDB-GENE-040426-2878 | prpf38b           |  |
| ENSDARG00000103480 | 5.668931228 | 2.23950788   | 0.811131055 | 2.760969224  | 0.005763011 | 0.091630539 | BX640512.3        |                      |                   |  |
| ENSDARG00000100818 | 2.301606057 | -1.959546689 | 0.709760738 | -2.760855291 | 0.005765021 | 0.091630539 | si:ch73-97h19.2   | ZDB-GENE-120214-33   | si:ch73-97h19.2   |  |
| ENSDARG00000032272 | 16.59558397 | -0.694342677 | 0.251646773 | -2.759195629 | 0.005794384 | 0.09202819  | sat1b             | ZDB-GENE-041001-39   | sat1b             |  |
| ENSDARG00000039830 | 92.77577582 | 0.285364063  | 0.103491417 | 2.757369358  | 0.005826849 | 0.092474497 | gng5              | ZDB-GENE-030131-9966 | gng5              |  |
| ENSDARG00000007485 | 59.09642708 | -0.367614783 | 0.133333409 | -2.757109303 | 0.005831485 | 0.09247718  | epc2              | ZDB-GENE-040426-802  | epc2              |  |
| ENSDARG00000005210 | 106.8652939 | 0.429502968  | 0.155793675 | 2.756870386  | 0.005835748 | 0.09247718  | coro2a            | ZDB-GENE-030131-2258 | coro2a            |  |
| ENSDARG00000027916 | 64.33863714 | -0.366658436 | 0.133033863 | -2.756128605 | 0.005848999 | 0.092578404 | fntb              | ZDB-GENE-030131-2220 | fntb              |  |
| ENSDARG00000071727 | 11.8033103  | -4.87162888  | 1.767629495 | -2.756023755 | 0.005850875 | 0.092578404 | si:dkey-37o8.1    | ZDB-GENE-030131-5667 | si:dkey-37o8.1    |  |
| ENSDARG00000061936 | 9.47124116  | -0.814273268 | 0.295486461 | -2.755704156 | 0.005856594 | 0.092599748 | fbxo10            | ZDB-GENE-090313-270  | fbxo10            |  |
| ENSDARG00000116680 | 219.2478818 | -0.310043854 | 0.112529134 | -2.75523184  | 0.005865056 | 0.092664386 | zgc:56235         | ZDB-GENE-040426-954  | zgc:56235         |  |
| ENSDARG00000037852 | 63.65621078 | -0.447729756 | 0.162551128 | -2.754393416 | 0.005880104 | 0.092832907 | zgc:101663        | ZDB-GENE-041114-149  | zgc:101663        |  |
| ENSDARG00000105214 | 95.15185195 | -0.367194043 | 0.133374948 | -2.753096042 | 0.005903457 | 0.093132207 | agtpbp1           | ZDB-GENE-081104-267  | agtpbp1           |  |
| ENSDARG00000052923 | 30.12429813 | 0.586221616  | 0.213042586 | 2.751664002  | 0.005929332 | 0.093470805 | zgc:113162        | ZDB-GENE-050522-530  | zgc:113162        |  |
| ENSDARG00000100480 | 23.0757554  | -0.698087005 | 0.253736364 | -2.751229638 | 0.005937201 | 0.093525257 | si:ch73-364h19.2  | ZDB-GENE-131119-21   | si:ch73-364h19.2  |  |
| ENSDARG00000075048 | 205.5960192 | 0.546549014  | 0.198816757 | 2.749008797  | 0.005977578 | 0.094091344 | lonrf1            | ZDB-GENE-101021-4    | lonrf1            |  |
| ENSDARG00000103952 | 4.256763655 | 1.343022425  | 0.488711298 | 2.748089578  | 0.005994363 | 0.0942855   | CABZ01054391.1    |                      |                   |  |
| ENSDARG00000045444 | 73.01851394 | 0.519554362  | 0.189103767 | 2.747456436  | 0.006005949 | 0.094397652 | fzd8a             | ZDB-GENE-000328-3    | fzd8a             |  |
| ENSDARG00000096628 | 3.976574695 | -7.04956523  | 2.566630836 | -2.746622198 | 0.006021245 | 0.094567916 | buc2l             | ZDB-GENE-030131-6407 | buc2l             |  |
| ENSDARG00000105287 | 1340.051307 | -0.436549635 | 0.159027115 | -2.745127047 | 0.006048748 | 0.094929493 | mpp1              | ZDB-GENE-031113-4    | mpp1              |  |
| ENSDARG00000018165 | 8.359379315 | -1.140499864 | 0.415520822 | -2.744747805 | 0.006055742 | 0.094968909 | depdc1a           | ZDB-GENE-030131-9827 | depdc1a           |  |
| ENSDARG00000079317 | 113.5453212 | 0.308812866  | 0.11253655  | 2.744111724  | 0.006067488 | 0.095080246 | d1c1              | ZDB-GENE-130206-12   | d1c1              |  |
| ENSDARG00000101181 | 47.7050235  | -0.505105591 | 0.18408459  | -2.74387765  | 0.006071816 | 0.095080246 | s100w             | ZDB-GENE-080407-2    | s100w             |  |
| ENSDARG00000071014 | 258.2465069 | 0.400767921  | 0.146108964 | 2.742938616  | 0.006089207 | 0.095282144 | s100u             | ZDB-GENE-030131-3121 | s100u             |  |
| ENSDARG00000110991 | 56.7862377  | -0.568365741 | 0.207243719 | -2.742499232 | 0.006097359 | 0.095295802 | ZNF276            | ZDB-GENE-070209-176  | zgc:158366        |  |
| ENSDARG00000037739 | 29.55971053 | -0.725068285 | 0.264397841 | -2.742338143 | 0.006100351 | 0.095295802 | zgc:112980        | ZDB-GENE-050306-1    | zgc:112980        |  |
| ENSDARG00000063417 | 161.2157444 | 0.271638949  | 0.099060042 | 2.74216469   | 0.006103573 | 0.095295802 | erf               | ZDB-GENE-010724-17   | erf               |  |
| ENSDARG00000098645 | 387.3541342 | 0.51990702   | 0.189640558 | 2.741539178  | 0.006115207 | 0.095310414 | rgn               | ZDB-GENE-040718-68   | rgn               |  |
| ENSDARG00000002021 | 270.6293331 | 0.347171201  | 0.126636777 | 2.741472187  | 0.006116454 | 0.095310414 | pygb              | ZDB-GENE-040928-2    | pygb              |  |
| ENSDARG00000016415 | 293.6350571 | 0.404011285  | 0.14737467  | 2.741388907  | 0.006118005 | 0.095310414 | dhtkd1            | ZDB-GENE-041212-44   | dhtkd1            |  |
| ENSDARG00000078576 | 48.22834812 | 0.371712921  | 0.135616165 | 2.740918985  | 0.006126761 | 0.095376701 | setd5             | ZDB-GENE-080523-1    | setd5             |  |
| ENSDARG00000055885 | 60.28801908 | -0.409493798 | 0.149476696 | -2.739515987 | 0.006152972 | 0.095671554 | tex10             | ZDB-GENE-040426-2827 | tex10             |  |
| ENSDARG00000055642 | 34.63474836 | -0.602368035 | 0.219888739 | -2.73942193  | 0.006154733 | 0.095671554 | si:ch211-217a12.1 | ZDB-GENE-121214-95   | si:ch211-217a12.1 |  |

|                    |             |              |             |              |             |             |                    |                      |                    |  |
|--------------------|-------------|--------------|-------------|--------------|-------------|-------------|--------------------|----------------------|--------------------|--|
| ENSDARG00000097063 | 4.476086725 | 1.260704944  | 0.460956277 | 2.734977277  | 0.006238458 | 0.096869847 | sparcl2            | ZDB-GENE-131127-575  | sparcl2            |  |
| ENSDARG00000008931 | 60.62611411 | 0.759334666  | 0.277651811 | 2.734844993  | 0.006240966 | 0.096869847 | renbp              | ZDB-GENE-041212-34   | renbp              |  |
| ENSDARG00000087752 | 11.46825498 | -1.007530277 | 0.368479345 | -2.734292414 | 0.00625145  | 0.096893282 | rfwd3              | ZDB-GENE-120529-1    | rfwd3              |  |
| ENSDARG00000101900 | 174.2101223 | -0.27401967  | 0.100216267 | -2.734283351 | 0.006251622 | 0.096893282 | xrn2               | ZDB-GENE-040426-2874 | xrn2               |  |
| ENSDARG00000027065 | 395.9033516 | -0.539191658 | 0.197264746 | -2.733340193 | 0.006269554 | 0.097100175 | slc38a3a           | ZDB-GENE-070615-25   | slc38a3a           |  |
| ENSDARG00000039196 | 55.44620125 | -0.5960605   | 0.218096442 | -2.733013406 | 0.006275778 | 0.097125569 | greb1l             | ZDB-GENE-030131-4022 | greb1l             |  |
| ENSDARG00000102434 | 4.392897082 | 1.373174599  | 0.502586049 | 2.732217901  | 0.006290952 | 0.097289342 | si:dkey-13m1.2     | ZDB-GENE-141216-261  | si:dkey-13m1.2     |  |
| ENSDARG00000094730 | 229.9947599 | 0.731702957  | 0.267840336 | 2.731862449  | 0.006297743 | 0.097323323 | acbd7              | ZDB-GENE-050913-108  | acbd7              |  |
| ENSDARG00000031588 | 291.2902907 | -0.956478182 | 0.350186543 | -2.731339056 | 0.006307754 | 0.097369413 | si:dkey-239b22.1   | ZDB-GENE-131119-12   | si:dkey-239b22.1   |  |
| ENSDARG00000042892 | 60.86646545 | -0.352210492 | 0.128956915 | -2.731226098 | 0.006309917 | 0.097369413 | paip1              | ZDB-GENE-040801-247  | paip1              |  |
| ENSDARG00000078335 | 111.5529491 | 0.30995518   | 0.113551933 | 2.729633676  | 0.006340474 | 0.097769736 | amot               | ZDB-GENE-030131-7487 | amot               |  |
| ENSDARG00000017675 | 101.2170067 | -0.421670259 | 0.154553533 | -2.72831201  | 0.006365936 | 0.098034524 | utp4               | ZDB-GENE-040426-2466 | utp4               |  |
| ENSDARG00000023712 | 1438.471554 | 0.397259972  | 0.145609167 | 2.728262096  | 0.0063669   | 0.098034524 | mao                | ZDB-GENE-040329-3    | mao                |  |
| ENSDARG00000040027 | 53.30393154 | 0.537829635  | 0.19715076  | 2.728011979  | 0.006371729 | 0.098037641 | osbpl10b           | ZDB-GENE-081002-4    | osbpl10b           |  |
| ENSDARG00000074726 | 23.60118233 | -0.629728319 | 0.230917359 | -2.727072237 | 0.006389905 | 0.098245946 | nrde2              | ZDB-GENE-111117-3    | nrde2              |  |
| ENSDARG00000052386 | 62.65481021 | 0.397455263  | 0.145829954 | 2.725470677  | 0.006420988 | 0.098632634 | cldnd1b            | ZDB-GENE-040808-4    | cldnd1b            |  |
| ENSDARG00000012387 | 694.982175  | -0.210280841 | 0.077163011 | -2.725150817 | 0.006427212 | 0.098632634 | pdha1a             | ZDB-GENE-040426-2719 | pdha1a             |  |
| ENSDARG00000100774 | 9.302072214 | -0.858558829 | 0.315083944 | -2.724857436 | 0.006432926 | 0.098632634 | cmc4               | ZDB-GENE-120216-1    | cmc4               |  |
| ENSDARG00000079124 | 17.19459906 | -0.636226323 | 0.233493066 | -2.724818911 | 0.006433676 | 0.098632634 | MTERF4             | ZDB-GENE-070912-693  | si:dkeyp-94h10.5   |  |
| ENSDARG00000003632 | 37.52909558 | 0.511751118  | 0.187946078 | 2.722861381  | 0.006471921 | 0.099147204 | zgc:172270         | ZDB-GENE-080204-67   | zgc:172270         |  |
| ENSDARG00000094899 | 2.439894937 | -1.634826885 | 0.60047532  | -2.722554669 | 0.006477931 | 0.099158554 | si:ch1073-143l10.2 | ZDB-GENE-030131-863  | si:ch1073-143l10.2 |  |
| ENSDARG00000098663 | 16.1497657  | -3.35031884  | 1.23067337  | -2.722346093 | 0.006482022 | 0.099158554 | fgf19              | ZDB-GENE-030729-32   | fgf19              |  |
| ENSDARG00000024167 | 3.749712147 | 1.338327114  | 0.491748155 | 2.721570181  | 0.006497259 | 0.099319929 | kcnh1a             | ZDB-GENE-061226-1    | kcnh1a             |  |
| ENSDARG00000011602 | 65.55455422 | -0.53932181  | 0.19825502  | -2.72034378  | 0.006521408 | 0.099611242 | si:dkeyp-117h8.2   | ZDB-GENE-041210-321  | si:dkeyp-117h8.2   |  |
| ENSDARG00000045003 | 156.0830985 | -0.324864617 | 0.11944646  | -2.719750913 | 0.006533111 | 0.099611242 | plvapb             | ZDB-GENE-060616-96   | plvapb             |  |
| ENSDARG00000030781 | 114.9625527 | -0.350288964 | 0.128798559 | -2.719665241 | 0.006534804 | 0.099611242 | acads              | ZDB-GENE-040808-64   | acads              |  |
| ENSDARG00000060297 | 90.13826665 | 0.412046181  | 0.15150711  | 2.719649134  | 0.006535122 | 0.099611242 | arhgap35b          | ZDB-GENE-060526-44   | arhgap35b          |  |
| ENSDARG00000094324 | 255.8217469 | 0.343780587  | 0.12643098  | 2.719116692  | 0.006545651 | 0.099644488 | efemp2a            | ZDB-GENE-041212-8    | efemp2a            |  |
| ENSDARG00000100729 | 716.2620034 | 0.193398183  | 0.071126769 | 2.719063231  | 0.006546709 | 0.099644488 | tln1               | ZDB-GENE-031002-48   | tln1               |  |
| ENSDARG00000011615 | 133.8644845 | -0.562003298 | 0.206727904 | -2.718565259 | 0.006556572 | 0.099722966 | mybpc3             | ZDB-GENE-070112-2362 | mybpc3             |  |
| ENSDARG00000058471 | 46.34395225 | -0.790461985 | 0.290865151 | -2.717623556 | 0.00657526  | 0.099935462 | plk1               | ZDB-GENE-021115-7    | plk1               |  |
| ENSDARG00000105479 | 23.4411577  | -0.735873938 | 0.270804167 | -2.717365641 | 0.006580387 | 0.099941686 | si:ch211-126c2.4   | ZDB-GENE-030131-3087 | si:ch211-126c2.4   |  |
| ENSDARG00000029671 | 91.18725426 | -0.317963565 | 0.117027098 | -2.717008023 | 0.006587501 | 0.099969678 | xpr1b              | ZDB-GENE-060503-266  | xpr1b              |  |
| ENSDARG00000057737 | 70.70295445 | 0.399035767  | 0.146877188 | 2.716798798  | 0.006591667 | 0.099969678 | rxraa              | ZDB-GENE-070314-2    | rxraa              |  |
