# Supplementary material
Source: publisher figshare collection journal article supplement (https://gsajournals.figshare.com/articles/dataset/_/13236983)
Supplement: Supplementary file 7 [file 1]

Supplemental Table S4: 21dpf trunk RNA-seq data, genes differentially expressed between *nr5a1b* and wildtypes.

| EnsemblID          | baseMean    | log2FoldChange | fold up        | fold down | lfcSE       | stat         | pvalue      | padj        | EnsemblGeneName  | ZFIN_ID              | ZFIN_Name        |
|--------------------|-------------|----------------|----------------|-----------|-------------|--------------|-------------|-------------|------------------|----------------------|------------------|
| ENSDARG00000116005 | 12.85333341 | 35.53162899    | 49669080577.44 | 0.00      | 2.802012109 | 12.68075498  | 7.56002E-37 | 1.53143E-32 | zgc:171446       | ZDB-GENE-080205-1    | zgc:171446       |
| ENSDARG00000078394 | 4.975737802 | 31.89567432    | 3995348827.53  | 0.00      | 4.762063474 | 6.69786837   | 2.11482E-11 | 5.35498E-08 | CABZ01059627.1   |                      |                  |
| ENSDARG00000040510 | 9.390766129 | 27.80775707    | 234946505.26   | 0.00      | 3.561065327 | 7.80883093   | 5.77209E-15 | 3.34218E-11 | ca15b            | ZDB-GENE-040426-2222 | ca15b            |
| ENSDARG00000070714 | 9.98505016  | 23.87273302    | 15360619.00    | 0.00      | 4.080094635 | 5.85102434   | 4.88555E-09 | 7.06904E-06 | zgc:173544       | ZDB-GENE-030131-6229 | zgc:173544       |
| ENSDARG00000105346 | 9.045770897 | 23.17568314    | 9474925.32     | 0.00      | 4.840719417 | 4.787652649  | 1.68743E-06 | 0.001266013 | zp2.2            | ZDB-GENE-010622-1    | zp2.2            |
| ENSDARG00000095486 | 5.762329285 | 21.44753176    | 2859896.99     | 0.00      | 5.815591288 | 3.687936565  | 0.00022608  | 0.0685432   | CU467646.2       |                      |                  |
| ENSDARG00000087392 | 15.91016015 | 16.467014      | 90586.85       | 0.00      | 2.292886749 | 7.181782534  | 6.88083E-13 | 2.32308E-09 | si:ch73-160p18.3 | ZDB-GENE-141212-268  | si:ch73-160p18.3 |
| ENSDARG00000105499 | 8.933914054 | 16.00795645    | 65898.43       | 0.00      | 2.561104368 | 6.250411601  | 4.09372E-10 | 8.29266E-07 | zgc:175135       | ZDB-GENE-080214-1    | zgc:175135       |
| ENSDARG00000093704 | 4.751079804 | 15.5778965     | 48911.85       | 0.00      | 3.214169905 | 4.846631312  | 1.25575E-06 | 0.001017513 | si:dkeyp-46h3.8  | ZDB-GENE-060503-183  | si:dkeyp-46h3.8  |
| ENSDARG00000093255 | 17.430777   | 15.30632842    | 40519.49       | 0.00      | 3.699288536 | 4.137641137  | 3.50895E-05 | 0.018225826 | si:dkey-229d11.3 | ZDB-GENE-091117-40   | si:dkey-229d11.3 |
| ENSDARG00000055751 | 32.85865787 | 3.274072479    | 9.67           | 0.10      | 0.383160596 | 8.544909133  | 1.28637E-17 | 1.3029E-13  | fosb             | ZDB-GENE-041114-181  | fosb             |
| ENSDARG00000079922 | 44.59147374 | 1.935461958    | 3.83           | 0.26      | 0.24839328  | 7.791925618  | 6.59956E-15 | 3.34218E-11 | klf4             | ZDB-GENE-111014-1    | klf4             |
| ENSDARG00000093304 | 11.27070965 | 1.923199968    | 3.79           | 0.26      | 0.319587286 | 6.017761204  | 1.76846E-09 | 2.83366E-06 | si:dkey-221j11.3 | ZDB-GENE-090313-247  | si:dkey-221j11.3 |
| ENSDARG00000044685 | 191.0641097 | 1.814517513    | 3.52           | 0.28      | 0.320763621 | 5.656868157  | 1.5416E-08  | 1.95176E-05 | nr0b2a           | ZDB-GENE-080403-1    | nr0b2a           |
| ENSDARG00000091669 | 28.49608733 | 1.655184134    | 3.15           | 0.32      | 0.252109642 | 6.565334509  | 5.19162E-11 | 1.16852E-07 | bicld2l          | ZDB-GENE-091204-161  | bicld2l          |
| ENSDARG00000010770 | 6.690305925 | 1.501285802    | 2.83           | 0.35      | 0.404738648 | 3.709272166  | 0.000207856 | 0.06578964  | sox19a           | ZDB-GENE-980526-102  | sox19a           |
| ENSDARG00000089307 | 13.12342719 | 1.348658219    | 2.55           | 0.39      | 0.259162921 | 5.203901139  | 1.95148E-07 | 0.000190223 | pmaip1           | ZDB-GENE-070119-3    | pmaip1           |
| ENSDARG00000060109 | 30.04494609 | 1.265468346    | 2.40           | 0.42      | 0.187047003 | 6.76550987   | 1.32841E-11 | 3.84422E-08 | aggf1            | ZDB-GENE-060929-836  | aggf1            |
| ENSDARG00000058606 | 252.7151589 | 1.222487837    | 2.33           | 0.43      | 0.211628371 | 5.776578209  | 7.62351E-09 | 1.02953E-05 | sik1             | ZDB-GENE-030131-9446 | sik1             |
| ENSDARG00000055854 | 29.24643184 | 1.202194489    | 2.30           | 0.43      | 0.251764829 | 4.775069234  | 1.79645E-06 | 0.001299671 | nr4a3            | ZDB-GENE-070824-4    | nr4a3            |
| ENSDARG00000029290 | 24.80883529 | 1.004585351    | 2.01           | 0.50      | 0.226690296 | 4.431532217  | 9.35658E-06 | 0.005574597 | stx11b.1         | ZDB-GENE-040426-1893 | stx11b.1         |
| ENSDARG00000020298 | 119.7201683 | 0.978522292    | 1.97           | 0.51      | 0.243079187 | 4.025528893  | 5.68474E-05 | 0.026780413 | btg2             | ZDB-GENE-000210-15   | btg2             |
| ENSDARG00000105641 | 38.26533107 | 0.839228375    | 1.79           | 0.56      | 0.22380558  | 3.749809875  | 0.000176969 | 0.058768112 | si:ch211-98n17.5 | ZDB-GENE-160728-87   | si:ch211-98n17.5 |
| ENSDARG00000087873 | 49.56970246 | 0.821144689    | 1.77           | 0.57      | 0.179971533 | 4.562636529  | 5.05152E-06 | 0.003197772 | eews             | ZDB-GENE-131121-365  | eews             |
| ENSDARG00000101135 | 52.95969954 | 0.749740824    | 1.68           | 0.59      | 0.199629989 | 3.75565228   | 0.000172891 | 0.058370748 | si:dkey-85k7.7   | ZDB-GENE-040128-7    | si:dkey-85k7.7   |
| ENSDARG00000059507 | 23.6779285  | 0.718962809    | 1.65           | 0.61      | 0.173130285 | 4.152727     | 3.28537E-05 | 0.017513594 | si:dkey-163m14.2 | ZDB-GENE-120215-47   | si:dkey-163m14.2 |
| ENSDARG00000030110 | 47.98595101 | 0.708266167    | 1.63           | 0.61      | 0.17049518  | 4.154171212  | 3.26469E-05 | 0.017513594 | myod1            | ZDB-GENE-980526-561  | myod1            |
| ENSDARG00000077130 | 34.59171923 | 0.64123953     | 1.56           | 0.64      | 0.164229866 | 3.904524463  | 9.44108E-05 | 0.039843342 | bcl10            | ZDB-GENE-100219-2    | bcl10            |
| ENSDARG00000099011 | 79.68674766 | 0.637373399    | 1.56           | 0.64      | 0.168658839 | 3.779069063  | 0.000157416 | 0.055943353 | slc38a5a         | ZDB-GENE-081105-92   | slc38a5a         |
| ENSDARG00000061841 | 78.10861133 | 0.617431618    | 1.53           | 0.65      | 0.110629529 | 5.581074257  | 2.39038E-08 | 2.84834E-05 | tiparp           | ZDB-GENE-031002-47   | tiparp           |
| ENSDARG00000088440 | 141.5108046 | 0.61704299     | 1.53           | 0.65      | 0.118617461 | 5.201957481  | 1.972E-07   | 0.000190223 | ssh2a            | ZDB-GENE-030131-3810 | ssh2a            |
| ENSDARG00000018524 | 273.247774  | 0.57393767     | 1.49           | 0.67      | 0.156073779 | 3.677348455  | 0.000235671 | 0.069188225 | midn             | ZDB-GENE-030131-2433 | midn             |
| ENSDARG00000100515 | 249.5827079 | 0.563691766    | 1.48           | 0.68      | 0.153033264 | 3.683459094  | 0.00023009  | 0.0685432   | dup1             | ZDB-GENE-040426-2018 | dup1             |
| ENSDARG00000016570 | 144.2095526 | 0.530328035    | 1.44           | 0.69      | 0.14851608  | 3.570845898  | 0.00035583  | 0.094842797 | prlra            | ZDB-GENE-080103-2    | prlra            |
| ENSDARG00000005972 | 82.05033023 | 0.445181644    | 1.36           | 0.73      | 0.124509511 | 3.575483021  | 0.000349582 | 0.094419731 | ric8b            | ZDB-GENE-030131-6435 | ric8b            |
| ENSDARG00000062390 | 114.7583094 | 0.368029797    | 1.29           | 0.77      | 0.097587121 | 3.771294744  | 0.000162403 | 0.056720547 | cdc42ep5         | ZDB-GENE-030131-5813 | cdc42ep5         |
| ENSDARG00000021439 | 691.9110344 | -0.3833897     | 0.77           | 1.30      | 0.100578713 | -3.811837401 | 0.000137938 | 0.053538991 | ncoa4            | ZDB-GENE-040426-689  | ncoa4            |
| ENSDARG00000044874 | 98.37936555 | -0.414264537   | 0.75           | 1.33      | 0.115681436 | -3.581080539 | 0.000342176 | 0.093668408 | zgc:92107        | ZDB-GENE-041114-4    | zgc:92107        |
| ENSDARG00000062058 | 152.6113647 | -0.470510415   | 0.72           | 1.39      | 0.132334454 | -3.55546421  | 0.000377312 | 0.097989994 | slc12a7b         | ZDB-GENE-030829-61   | slc12a7b         |
| ENSDARG00000101195 | 84.27840468 | -0.485233191   | 0.71           | 1.40      | 0.133097586 | -3.64569489  | 0.00026667  | 0.075652392 | cyp1c1           | ZDB-GENE-050522-501  | cyp1c1           |
| ENSDARG00000059610 | 67.30614306 | -0.499726464   | 0.71           | 1.41      | 0.131229658 | -3.808029935 | 0.000140078 | 0.053538991 | gpr146           | ZDB-GENE-050823-3    | gpr146           |
| ENSDARG00000041607 | 158.3568523 | -0.520096396   | 0.70           | 1.43      | 0.129749858 | -4.008454447 | 6.11174E-05 | 0.028137629 | eif4ebp3l        | ZDB-GENE-030826-26   | eif4ebp3l        |
| ENSDARG00000057652 | 482.4642488 | -0.606035391   | 0.66           | 1.52      | 0.132051447 | -4.589388484 | 4.44546E-06 | 0.002904896 | dbpb             | ZDB-GENE-100922-6    | dbpb             |
| ENSDARG00000074390 | 95.81920218 | -0.630675647   | 0.65           | 1.55      | 0.175518541 | -3.593213821 | 0.000326624 | 0.090636018 | tmem176l.4       | ZDB-GENE-030131-3532 | tmem176l.4       |
| ENSDARG00000100826 | 254.3471364 | -0.650909456   | 0.64           | 1.57      | 0.163669276 | -3.976980122 | 6.9796E-05  | 0.031419056 | hif1al           | ZDB-GENE-040426-1315 | hif1al           |
| ENSDARG00000094760 | 30.81847426 | -0.658479529   | 0.63           | 1.58      | 0.185161841 | -3.556237747 | 0.000376204 | 0.097989994 | si:dkey-125i10.3 | ZDB-GENE-060526-198  | si:dkey-125i10.3 |
| ENSDARG00000040410 | 76.68547307 | -0.68146192    | 0.62           | 1.60      | 0.182513359 | -3.733764609 | 0.000186369 | 0.060654862 | lox12a           | ZDB-GENE-070818-1    | lox12a           |
| ENSDARG00000011371 | 140.4107802 | -0.693481546   | 0.62           | 1.62      | 0.170919496 | -4.057357768 | 4.9631E-05  | 0.024322512 | zgc:64106        | ZDB-GENE-040426-1370 | zgc:64106        |
| ENSDARG00000028731 | 69.248405   | -0.694060811   | 0.62           | 1.62      | 0.177384466 | -3.912748554 | 9.12515E-05 | 0.039329412 | stat4            | ZDB-GENE-030616-264  | stat4            |
| ENSDARG00000102058 | 18.07537253 | -0.72549414    | 0.60           | 1.65      | 0.199116857 | -3.6435962   | 0.000268893 | 0.075652392 | si:dkeyp-11e3.1  | ZDB-GENE-141222-55   | si:dkeyp-11e3.1  |
| ENSDARG00000036848 | 112.7729195 | -0.762970736   | 0.59           | 1.70      | 0.202571618 | -3.766424662 | 0.000165602 | 0.056857631 | slc43a2a         | ZDB-GENE-040426-964  | slc43a2a         |
| ENSDARG00000041294 | 44.0806646  | -0.913597057   | 0.53           | 1.88      | 0.244408011 | -3.737999633 | 0.00018549  | 0.060604441 | noxo1a           | ZDB-GENE-030131-9700 | noxo1a           |
| ENSDARG00000038321 | 112.5910405 | -0.916981658   | 0.53           | 1.89      | 0.242250524 | -3.785261814 | 0.000153547 | 0.055542827 | zgc:172053       | ZDB-GENE-080219-25   | zgc:172053       |
| ENSDARG00000070434 | 21.36927845 | -0.945473158   | 0.52           | 1.93      | 0.218606773 | -4.324994814 | 1.52535E-05 | 0.008828316 | rhov             | ZDB-GENE-031002-10   | rhov             |
| ENSDARG00000062221 | 15.1448281  | -0.985924479   | 0.50           | 1.98      | 0.257077974 | -3.835118449 | 0.000125504 | 0.049849616 | arap1a           | ZDB-GENE-030131-6226 | arap1a           |
| ENSDARG00000105179 | 12.27115326 | -0.988505089   | 0.50           | 1.98      | 0.268343068 | -3.683736256 | 0.00022984  | 0.0685432   | hdac7a           | ZDB-GENE-150129-1    | hdac7a           |
| ENSDARG00000069559 | 93.96355756 | -1.017087584   | 0.49           | 2.02      | 0.249879883 | -4.070305981 | 4.69514E-05 | 0.023777378 | muc13a           | ZDB-GENE-061207-26   | muc13a           |
