# Supplementary material
Source: publisher figshare collection journal article supplement (https://gsajournals.figshare.com/articles/dataset/_/13236983)
Supplement: Supplementary file 9 [file 1]

**Table S2. Genes differentially expressed in *nr5a1b*- expressing cells**

|                  | p_val     | avg_logFC  | pct.1 | pct.2 | p_val_adj | Chr | Gene Start Position |
|------------------|-----------|------------|-------|-------|-----------|-----|---------------------|
| <i>nr5a1b</i>    | 0         | 1.15968628 | 1     | 0     | 0         | 21  | 8276989             |
| <i>kctd4</i>     | 1.37E-156 | 2.20152914 | 0.488 | 0.014 | 4.45E-152 | 9   | 18876036            |
| <i>cbln1</i>     | 9.25E-151 | 1.38496652 | 0.465 | 0.013 | 3.01E-146 | 18  | 18104235            |
| <i>sox1a</i>     | 7.95E-147 | 1.14884424 | 0.628 | 0.024 | 2.59E-142 | 9   | 21722733            |
| <i>nkx2.4b</i>   | 1.04E-129 | 1.00237482 | 0.558 | 0.021 | 3.37E-125 | 20  | 48803248            |
| <i>sox14</i>     | 8.63E-125 | 1.66769868 | 0.605 | 0.027 | 2.81E-120 | 6   | 26557979            |
| <i>nkx2.1</i>    | 1.17E-116 | 0.99761997 | 0.512 | 0.02  | 3.80E-112 | 17  | 38262408            |
| <i>slc17a6a</i>  | 4.41E-81  | 0.5678035  | 0.256 | 0.007 | 1.44E-76  | 25  | 35250976            |
| <i>sox1b</i>     | 4.73E-76  | 1.94365675 | 0.744 | 0.067 | 1.54E-71  | 1   | 46194333            |
| <i>six6a</i>     | 2.97E-74  | 0.96800435 | 0.442 | 0.023 | 9.65E-70  | 13  | 31583034            |
| <i>lhx5</i>      | 5.82E-70  | 1.11153267 | 0.651 | 0.053 | 1.89E-65  | 21  | 15913128            |
| <i>six6b</i>     | 8.65E-69  | 2.14052411 | 0.744 | 0.076 | 2.81E-64  | 20  | 20531002            |
| <i>scg2b</i>     | 7.10E-64  | 0.75697422 | 0.465 | 0.029 | 2.31E-59  | 2   | 47581997            |
| <i>maptb</i>     | 1.01E-61  | 1.00753431 | 0.581 | 0.048 | 3.29E-57  | 3   | 22158024            |
| <i>gpr85</i>     | 2.60E-61  | 0.78335509 | 0.512 | 0.037 | 8.45E-57  | 4   | 6643421             |
| <i>phyhipla</i>  | 2.68E-61  | 0.5228409  | 0.302 | 0.013 | 8.70E-57  | 17  | 20963477            |
| <i>dclk1b</i>    | 3.43E-61  | 1.26370043 | 0.628 | 0.058 | 1.11E-56  | 15  | 32821392            |
| <i>nos1apb</i>   | 3.93E-60  | 0.51656859 | 0.256 | 0.01  | 1.28E-55  | 2   | 6926100             |
| <i>ptpn5</i>     | 1.16E-53  | 0.71972907 | 0.419 | 0.028 | 3.76E-49  | 7   | 39624728            |
| <i>nr5a2</i>     | 2.06E-52  | 0.79304878 | 0.302 | 0.015 | 6.70E-48  | 22  | 22634007            |
| FP085414.1       | 1.08E-50  | 0.69811817 | 0.395 | 0.027 | 3.52E-46  | 24  | 30349981            |
| <i>ppfia3</i>    | 4.17E-50  | 0.6562227  | 0.465 | 0.037 | 1.35E-45  | 3   | 30044011            |
| LO018196.1       | 5.05E-50  | 0.98095318 | 0.674 | 0.079 | 1.64E-45  | 22  | 37275954            |
| <i>nkx2.4a</i>   | 6.06E-50  | 0.85277444 | 0.349 | 0.021 | 1.97E-45  | 17  | 42095247            |
| <i>cxxc4</i>     | 7.33E-50  | 0.95305113 | 0.628 | 0.067 | 2.39E-45  | 1   | 26250729            |
| <i>islr2</i>     | 1.90E-49  | 1.69763545 | 0.558 | 0.055 | 6.17E-45  | 25  | 22635166            |
| <i>tmsb2</i>     | 4.46E-48  | 1.50843222 | 0.674 | 0.082 | 1.45E-43  | 14  | 34486629            |
| <i>sv2a</i>      | 5.77E-48  | 0.96730694 | 0.465 | 0.039 | 1.88E-43  | 16  | 46111849            |
| <i>lrriq1</i>    | 3.96E-47  | 0.37289018 | 0.279 | 0.015 | 1.29E-42  | 18  | 16192083            |
| <i>nr0b1</i>     | 9.89E-47  | 0.41805229 | 0.233 | 0.01  | 3.22E-42  | 11  | 29682909            |
| <i>nell2b</i>    | 2.22E-45  | 1.41664811 | 0.488 | 0.046 | 7.20E-41  | 4   | 14247693            |
| si:dkey-70p6.    | 3.36E-44  | 0.22672924 | 0.186 | 0.007 | 1.09E-39  | 8   | 23040727            |
| <i>tuba2</i>     | 3.47E-43  | 0.90169043 | 0.581 | 0.067 | 1.13E-38  | 11  | 3336524             |
| <i>slc29a4</i>   | 8.59E-43  | 0.35302129 | 0.256 | 0.013 | 2.79E-38  | 3   | 40315410            |
| <i>ppp1r14ba</i> | 1.18E-40  | 0.90995745 | 0.419 | 0.037 | 3.85E-36  | 21  | 26996276            |
| <i>zgc:65894</i> | 4.47E-40  | 1.16182062 | 0.605 | 0.078 | 1.45E-35  | 1   | 56217388            |
| <i>map7d2b</i>   | 8.84E-40  | 0.5586836  | 0.442 | 0.041 | 2.88E-35  | 24  | 24118193            |
| <i>klf7b</i>     | 1.55E-39  | 1.17894193 | 0.744 | 0.122 | 5.03E-35  | 9   | 28341109            |
| <i>necap1</i>    | 4.50E-39  | 0.67216955 | 0.581 | 0.072 | 1.46E-34  | 19  | 10396042            |
| <i>aatkb</i>     | 1.55E-38  | 0.17641703 | 0.163 | 0.006 | 5.05E-34  | 12  | 35702809            |

|               |          |            |       |       |          |    |          |
|---------------|----------|------------|-------|-------|----------|----|----------|
| elmod1        | 5.82E-38 | 0.3539293  | 0.256 | 0.015 | 1.89E-33 | 21 | 22099300 |
| zgc:172182    | 1.05E-37 | 0.15286336 | 0.14  | 0.005 | 3.42E-33 | 9  | 48386928 |
| slc35g2a      | 1.09E-37 | 0.3936345  | 0.256 | 0.015 | 3.54E-33 | 2  | 24990398 |
| isl1          | 3.05E-37 | 1.39967253 | 0.512 | 0.06  | 9.93E-33 | 5  | 40728613 |
| fzr1b         | 5.01E-37 | 0.39663678 | 0.372 | 0.032 | 1.63E-32 | 2  | 6126086  |
| dscama        | 1.33E-36 | 0.29759867 | 0.186 | 0.008 | 4.32E-32 | 10 | 38775408 |
| mlt11         | 2.36E-36 | 1.38332168 | 0.744 | 0.129 | 7.68E-32 | 19 | 7445644  |
| celf3a        | 1.70E-35 | 1.09633522 | 0.814 | 0.157 | 5.54E-31 | 19 | 8816657  |
| shisa7b       | 3.50E-35 | 0.34673056 | 0.256 | 0.016 | 1.14E-30 | 19 | 10217598 |
| rtn1b         | 4.03E-35 | 1.41480496 | 0.721 | 0.124 | 1.31E-30 | 20 | 20637866 |
| nmnat2        | 4.50E-35 | 0.5165446  | 0.372 | 0.033 | 1.46E-30 | 2  | 36026183 |
| gap43         | 5.28E-35 | 1.6727185  | 0.698 | 0.12  | 1.72E-30 | 15 | 47161917 |
| si:dkeyp-117l | 5.68E-35 | 0.53928762 | 0.395 | 0.038 | 1.85E-30 | 20 | 25659839 |
| stx1b         | 1.01E-34 | 1.18585689 | 0.651 | 0.101 | 3.29E-30 | 19 | 5158306  |
| nexmifa       | 1.22E-34 | 0.64779918 | 0.465 | 0.053 | 3.96E-30 | 5  | 23118470 |
| pak6a         | 1.91E-34 | 0.15094359 | 0.116 | 0.004 | 6.21E-30 | 17 | 2162916  |
| stmn2a        | 2.11E-34 | 1.47341618 | 0.581 | 0.084 | 6.87E-30 | 16 | 16165029 |
| gng3          | 5.22E-34 | 1.73534405 | 0.791 | 0.168 | 1.70E-29 | 21 | 26697536 |
| nol4lb        | 6.29E-34 | 0.18418827 | 0.116 | 0.004 | 2.05E-29 | 23 | 17220986 |
| ndrg4         | 1.93E-33 | 0.73771525 | 0.535 | 0.07  | 6.28E-29 | 25 | 13332280 |
| serp2         | 2.99E-33 | 0.26319141 | 0.279 | 0.02  | 9.73E-29 | 9  | 18716485 |
| mapk8ip2      | 4.76E-33 | 0.22016793 | 0.186 | 0.009 | 1.55E-28 | 18 | 8255265  |
| pou2f2a       | 2.09E-32 | 0.63295223 | 0.465 | 0.055 | 6.80E-28 | 19 | 6213680  |
| csdc2a        | 3.01E-32 | 0.73106944 | 0.581 | 0.085 | 9.78E-28 | 12 | 19099264 |
| scg5          | 5.11E-32 | 0.53010208 | 0.349 | 0.032 | 1.66E-27 | 20 | 29471151 |
| sncb          | 1.15E-31 | 1.50036574 | 0.651 | 0.115 | 3.75E-27 | 14 | 50770537 |
| gpr22a        | 1.48E-31 | 0.18553108 | 0.14  | 0.006 | 4.82E-27 | 4  | 2619132  |
| dync1i1       | 1.85E-31 | 0.53495121 | 0.419 | 0.047 | 6.02E-27 | 16 | 25316973 |
| vamp2         | 2.68E-31 | 0.86969171 | 0.628 | 0.101 | 8.71E-27 | 10 | 22838364 |
| apba2b        | 2.94E-31 | 0.66310134 | 0.442 | 0.052 | 9.56E-27 | 7  | 30787903 |
| atat1         | 3.48E-31 | 0.45619835 | 0.349 | 0.033 | 1.13E-26 | 19 | 27479563 |
| snap91        | 4.54E-31 | 0.40508392 | 0.349 | 0.033 | 1.48E-26 | 16 | 33005688 |
| basp1         | 5.65E-31 | 0.91474706 | 0.535 | 0.076 | 1.84E-26 | 2  | 42724404 |
| atp6ap1lb     | 6.09E-31 | 0.30609318 | 0.233 | 0.015 | 1.98E-26 | 23 | 19558574 |
| nsfa          | 6.84E-31 | 0.67071429 | 0.465 | 0.057 | 2.22E-26 | 3  | 34766989 |
| mpped2a       | 9.49E-31 | 1.242377   | 0.535 | 0.082 | 3.09E-26 | 7  | 16348835 |
| glipr1b       | 9.72E-31 | 0.40797558 | 0.209 | 0.013 | 3.16E-26 | 18 | 7345417  |
| lmo3          | 1.55E-30 | 1.94191732 | 0.674 | 0.133 | 5.04E-26 | 4  | 12612145 |
| id4           | 1.77E-30 | 1.22292692 | 0.674 | 0.122 | 5.75E-26 | 16 | 9977858  |
| skor1b        | 2.05E-30 | 0.4308264  | 0.186 | 0.01  | 6.67E-26 | 18 | 19972853 |
| kif5aa        | 2.18E-30 | 0.4509096  | 0.419 | 0.047 | 7.10E-26 | 9  | 265988   |
| st8sia5       | 2.38E-30 | 0.36339513 | 0.279 | 0.022 | 7.74E-26 | 21 | 5209476  |
| nlgn3a        | 3.85E-30 | 0.35012892 | 0.233 | 0.016 | 1.25E-25 | 14 | 14224730 |

|              |          |            |       |       |          |    |          |
|--------------|----------|------------|-------|-------|----------|----|----------|
| mpped2       | 6.84E-30 | 0.80316955 | 0.558 | 0.087 | 2.22E-25 | 25 | 14694876 |
| phactr3a     | 9.62E-30 | 0.34558656 | 0.302 | 0.026 | 3.13E-25 | 23 | 12232773 |
| celf4        | 1.77E-29 | 0.68561288 | 0.349 | 0.035 | 5.75E-25 | 21 | 12079878 |
| kctd7        | 2.78E-29 | 0.24852743 | 0.233 | 0.016 | 9.05E-25 | 10 | 32881586 |
| nsg2         | 4.21E-29 | 1.09272874 | 0.721 | 0.139 | 1.37E-24 | 21 | 41256771 |
| nkx2.2a      | 6.52E-29 | 1.08820102 | 0.395 | 0.045 | 2.12E-24 | 17 | 42208623 |
| ptchd1       | 7.33E-29 | 0.16939812 | 0.116 | 0.004 | 2.38E-24 | 24 | 25347503 |
| cadm1b       | 7.80E-29 | 0.14791347 | 0.116 | 0.004 | 2.54E-24 | 15 | 18863872 |
| jagn1a       | 1.67E-28 | 0.69020141 | 0.535 | 0.079 | 5.43E-24 | 9  | 30108641 |
| fam131ba     | 2.41E-28 | 0.17360357 | 0.14  | 0.006 | 7.83E-24 | 19 | 9533008  |
| carmil2      | 2.65E-28 | 0.58681155 | 0.419 | 0.051 | 8.62E-24 | 18 | 22302635 |
| slc17a6b     | 3.16E-28 | 0.47897876 | 0.256 | 0.02  | 1.03E-23 | 7  | 32811907 |
| dpysl3       | 1.37E-27 | 1.02999914 | 0.674 | 0.135 | 4.44E-23 | 21 | 42970983 |
| si:ch211-26b | 3.24E-27 | 0.19496095 | 0.14  | 0.006 | 1.05E-22 | 5  | 22871718 |
| ywhag1       | 3.32E-27 | 0.47709924 | 0.279 | 0.025 | 1.08E-22 | 5  | 3501859  |
| si:ch211-153 | 3.60E-27 | 0.17058136 | 0.116 | 0.005 | 1.17E-22 | 20 | 46544052 |
| pcsk1nl      | 4.80E-27 | 0.67161167 | 0.395 | 0.048 | 1.56E-22 | 8  | 7359294  |
| CT573433.1   | 5.13E-27 | 0.26093106 | 0.209 | 0.014 | 1.67E-22 | 2  | 11976261 |
| atp1a3a      | 1.10E-26 | 0.94561793 | 0.535 | 0.088 | 3.58E-22 | 19 | 6328234  |
| rx3          | 1.11E-26 | 0.85080374 | 0.233 | 0.018 | 3.62E-22 | 21 | 10756154 |
| si:dkey-40m6 | 1.41E-26 | 0.22884975 | 0.233 | 0.017 | 4.59E-22 | 16 | 32059785 |
| rasd4        | 2.11E-26 | 0.67160845 | 0.186 | 0.012 | 6.86E-22 | 3  | 59051503 |
| myt1b        | 3.47E-26 | 1.12507566 | 0.721 | 0.159 | 1.13E-21 | 23 | 7762033  |
| add2         | 8.79E-26 | 0.44108062 | 0.372 | 0.045 | 2.86E-21 | 5  | 13781968 |
| itm2ca       | 1.21E-25 | 0.32474475 | 0.302 | 0.03  | 3.94E-21 | 15 | 40008370 |
| cnrip1a      | 1.91E-25 | 0.8206541  | 0.558 | 0.098 | 6.21E-21 | 1  | 51593884 |
| nexmifb      | 2.60E-25 | 0.36345868 | 0.256 | 0.022 | 8.47E-21 | 14 | 11103718 |
| arf3a        | 2.61E-25 | 0.16561833 | 0.14  | 0.007 | 8.48E-21 | 23 | 27622020 |
| prdm12b      | 2.76E-25 | 1.01760854 | 0.372 | 0.045 | 8.99E-21 | 5  | 63509761 |
| map2         | 3.10E-25 | 0.7121166  | 0.605 | 0.116 | 1.01E-20 | 9  | 38883388 |
| pcdh1g26     | 6.27E-25 | 0.1787276  | 0.186 | 0.012 | 2.04E-20 | 10 | 21786656 |
| cdk5r2a      | 6.44E-25 | 0.34929325 | 0.233 | 0.019 | 2.09E-20 | 6  | 13742899 |
| gpr75        | 1.22E-24 | 0.19372737 | 0.163 | 0.01  | 3.95E-20 | 13 | 35745572 |
| stmn1b       | 1.27E-24 | 1.80409634 | 0.86  | 0.293 | 4.12E-20 | 16 | 34523515 |
| camta1b      | 1.85E-24 | 0.54211438 | 0.302 | 0.032 | 6.01E-20 | 11 | 39672874 |
| gnao1a       | 1.91E-24 | 0.61723499 | 0.535 | 0.092 | 6.20E-20 | 18 | 22793465 |
| syt4         | 2.21E-24 | 0.38281114 | 0.279 | 0.027 | 7.17E-20 | 7  | 23907692 |
| ywhag2       | 3.27E-24 | 1.3634606  | 0.674 | 0.165 | 1.06E-19 | 15 | 15348490 |
| prdm13       | 4.03E-24 | 0.30196823 | 0.256 | 0.023 | 1.31E-19 | 16 | 32749591 |
| si:ch211-113 | 4.78E-24 | 0.22361237 | 0.163 | 0.01  | 1.56E-19 | 16 | 29407666 |
| fez1         | 5.94E-24 | 1.04205654 | 0.605 | 0.124 | 1.93E-19 | 10 | 31738501 |
| nalcn        | 6.86E-24 | 0.18487433 | 0.116 | 0.005 | 2.23E-19 | 9  | 31589425 |
| kidins220b   | 9.48E-24 | 0.84990746 | 0.465 | 0.075 | 3.08E-19 | 20 | 29743904 |

|              |          |            |       |       |          |    |          |
|--------------|----------|------------|-------|-------|----------|----|----------|
| cadpsb       | 1.04E-23 | 0.32560874 | 0.233 | 0.02  | 3.40E-19 | 6  | 41255485 |
| zgc:194578   | 5.09E-23 | 0.33454764 | 0.279 | 0.028 | 1.66E-18 | 19 | 10375782 |
| rundc3ab     | 5.71E-23 | 0.42056293 | 0.372 | 0.048 | 1.86E-18 | 12 | 9817440  |
| casin1       | 5.78E-23 | 0.32489293 | 0.233 | 0.02  | 1.88E-18 | 3  | 35632773 |
| gdi1         | 6.43E-23 | 0.92206779 | 0.698 | 0.174 | 2.09E-18 | 23 | 26063149 |
| lrfn5b       | 6.98E-23 | 0.26472496 | 0.186 | 0.013 | 2.27E-18 | 20 | 54383838 |
| ttbk1b       | 7.21E-23 | 0.11181716 | 0.116 | 0.005 | 2.34E-18 | 17 | 22032296 |
| plxcd3       | 1.04E-22 | 0.45462495 | 0.186 | 0.013 | 3.39E-18 | 8  | 31821396 |
| sypa         | 1.14E-22 | 0.51509984 | 0.349 | 0.044 | 3.69E-18 | 8  | 22930627 |
| si:ch211-218 | 1.17E-22 | 0.15885326 | 0.116 | 0.005 | 3.79E-18 | 9  | 34425728 |
| map1aa       | 1.33E-22 | 0.48373261 | 0.419 | 0.061 | 4.34E-18 | 7  | 52830254 |
| si:dkeyp-75h | 1.42E-22 | 0.81381914 | 0.744 | 0.187 | 4.60E-18 | 7  | 24485048 |
| clcn4        | 1.65E-22 | 0.33043453 | 0.349 | 0.044 | 5.37E-18 | 11 | 44144612 |
| dctn1b       | 2.37E-22 | 0.33452603 | 0.209 | 0.017 | 7.70E-18 | 13 | 11581942 |
| spred3       | 3.46E-22 | 0.23923299 | 0.233 | 0.021 | 1.13E-17 | 18 | 44596787 |
| CR925804.2   | 4.04E-22 | 0.18382436 | 0.163 | 0.011 | 1.31E-17 | 16 | 44435453 |
| fezf1        | 4.15E-22 | 1.02938945 | 0.302 | 0.035 | 1.35E-17 | 25 | 28272908 |
| uchl1        | 4.53E-22 | 0.86306689 | 0.372 | 0.052 | 1.47E-17 | 1  | 22647756 |
| rnd1a        | 5.08E-22 | 0.34865164 | 0.209 | 0.017 | 1.65E-17 | 23 | 17800717 |
| rnasekb      | 7.58E-22 | 0.99887666 | 0.86  | 0.29  | 2.46E-17 | 10 | 22916113 |
| cacnb4b      | 1.32E-21 | 0.2344713  | 0.209 | 0.018 | 4.28E-17 | 6  | 14086688 |
| si:ch211-255 | 1.36E-21 | 0.37858372 | 0.186 | 0.014 | 4.44E-17 | 16 | 34479064 |
| si:ch73-335r | 1.58E-21 | 0.14123223 | 0.14  | 0.008 | 5.15E-17 | 14 | 33898976 |
| kcnj3a       | 4.37E-21 | 0.18277132 | 0.116 | 0.006 | 1.42E-16 | 9  | 4478199  |
| PCP4L1       | 4.44E-21 | 0.62016088 | 0.419 | 0.068 | 1.44E-16 | 7  | 73630751 |
| rab3c        | 8.08E-21 | 0.32407338 | 0.302 | 0.036 | 2.63E-16 | 8  | 17055292 |
| CSRNP3       | 8.56E-21 | 0.20390974 | 0.163 | 0.011 | 2.78E-16 | 9  | 49659114 |
| at11         | 8.80E-21 | 0.27014839 | 0.256 | 0.026 | 2.86E-16 | 13 | 36764715 |
| gabbr1b      | 9.01E-21 | 0.25025017 | 0.14  | 0.008 | 2.93E-16 | 19 | 27040533 |
| tmem74b      | 9.21E-21 | 0.17898607 | 0.116 | 0.006 | 3.00E-16 | 6  | 51773873 |
| map4l        | 9.56E-21 | 0.4040222  | 0.302 | 0.036 | 3.11E-16 | 2  | 24177006 |
| ppfia4       | 9.89E-21 | 0.26590443 | 0.209 | 0.018 | 3.22E-16 | 11 | 22374419 |
| sh3gl2a      | 1.52E-20 | 0.53745987 | 0.372 | 0.054 | 4.93E-16 | 1  | 26740718 |
| nkx2.2b      | 1.67E-20 | 0.61779803 | 0.233 | 0.023 | 5.42E-16 | 20 | 48782068 |
| GNAZ         | 1.70E-20 | 0.22142014 | 0.209 | 0.018 | 5.52E-16 | 10 | 17254502 |
| adam22       | 2.64E-20 | 0.39253926 | 0.349 | 0.048 | 8.59E-16 | 16 | 43152727 |
| tsc22d1      | 2.87E-20 | 0.84500925 | 0.767 | 0.229 | 9.33E-16 | 9  | 18732505 |
| jakmip2      | 2.94E-20 | 0.32787435 | 0.256 | 0.027 | 9.57E-16 | 21 | 43029708 |
| caly         | 3.46E-20 | 0.34048519 | 0.209 | 0.019 | 1.13E-15 | 1  | 49266886 |
| si:dkey-280e | 3.84E-20 | 0.62236801 | 0.419 | 0.069 | 1.25E-15 | 14 | 25464681 |
| eno2         | 4.61E-20 | 0.3348155  | 0.256 | 0.027 | 1.50E-15 | 19 | 5072918  |
| cplx2        | 4.62E-20 | 0.69009273 | 0.419 | 0.071 | 1.50E-15 | 14 | 25534604 |
| sgip1a       | 4.65E-20 | 0.48584815 | 0.395 | 0.062 | 1.51E-15 | 6  | 30709926 |

|               |          |            |       |       |          |     |          |
|---------------|----------|------------|-------|-------|----------|-----|----------|
| ttl17         | 4.70E-20 | 0.31185212 | 0.326 | 0.042 | 1.53E-15 | 11  | 7981243  |
| elavl3        | 5.08E-20 | 1.29501823 | 0.86  | 0.328 | 1.65E-15 | 3   | 46800190 |
| l1cama        | 5.08E-20 | 0.33989103 | 0.163 | 0.012 | 1.65E-15 | 23  | 28582865 |
| serpini1      | 5.28E-20 | 0.17342041 | 0.116 | 0.006 | 1.72E-15 | 18  | 5137241  |
| atpv0e2       | 5.90E-20 | 0.9270459  | 0.674 | 0.17  | 1.92E-15 | 22  | 34701848 |
| gas7a         | 6.10E-20 | 0.44734744 | 0.279 | 0.033 | 1.99E-15 | 3   | 50310684 |
| lrrn3a        | 9.06E-20 | 0.14182539 | 0.14  | 0.009 | 2.95E-15 | 25  | 21324588 |
| prrt2         | 1.12E-19 | 0.12472587 | 0.116 | 0.006 | 3.63E-15 | 12  | 5081759  |
| si:dkey-12h9. | 1.16E-19 | 0.49282432 | 0.326 | 0.045 | 3.77E-15 | 20  | 26026518 |
| elavl4        | 1.63E-19 | 0.72779526 | 0.628 | 0.15  | 5.29E-15 | 8   | 16004154 |
| vax1          | 1.95E-19 | 0.46639902 | 0.233 | 0.024 | 6.33E-15 | 17  | 21432693 |
| si:dkey-153k: | 2.01E-19 | 0.43373191 | 0.302 | 0.038 | 6.55E-15 | 4   | 9669717  |
| SNAP91 (1 o   | 2.06E-19 | 0.32160243 | 0.256 | 0.028 | 6.69E-15 | 4   | 5260941  |
| adam23a       | 2.24E-19 | 0.27410018 | 0.209 | 0.019 | 7.30E-15 | 6   | 13136602 |
| zgc:153615    | 2.25E-19 | 0.16224848 | 0.163 | 0.012 | 7.33E-15 | 2   | 9629558  |
| stmn2b        | 2.90E-19 | 1.12647725 | 0.512 | 0.108 | 9.45E-15 | 19  | 31771270 |
| ica1          | 3.22E-19 | 0.12080294 | 0.116 | 0.006 | 1.05E-14 | 16  | 47207691 |
| rac3a         | 4.71E-19 | 0.47284501 | 0.349 | 0.051 | 1.53E-14 | 3   | 36248851 |
| tubb5         | 6.45E-19 | 1.53259845 | 0.907 | 0.444 | 2.10E-14 | 16  | 10318893 |
| apba1b        | 6.60E-19 | 0.2633036  | 0.279 | 0.034 | 2.15E-14 | 10  | 15777064 |
| pou2f2a.1     | 6.87E-19 | 0.60095668 | 0.535 | 0.111 | 2.23E-14 | ### | #N/A     |
| atp1b2a       | 8.50E-19 | 0.67714285 | 0.698 | 0.196 | 2.77E-14 | 23  | 44732863 |
| FNDC10        | 1.08E-18 | 0.4140871  | 0.256 | 0.03  | 3.50E-14 | 22  | 370915   |
| six3b         | 1.13E-18 | 1.04628557 | 0.535 | 0.119 | 3.66E-14 | 12  | 25600685 |
| morn4         | 1.35E-18 | 0.38466977 | 0.326 | 0.046 | 4.39E-14 | 13  | 40746281 |
| cdh4          | 1.64E-18 | 0.1879036  | 0.186 | 0.016 | 5.32E-14 | 11  | 20371179 |
| camsap1a      | 1.74E-18 | 0.16890876 | 0.163 | 0.013 | 5.64E-14 | 21  | 4712134  |
| nlgn4a        | 2.06E-18 | 0.15305727 | 0.116 | 0.007 | 6.69E-14 | 1   | 32521469 |
| zgc:100920    | 2.26E-18 | 0.76830241 | 0.698 | 0.197 | 7.33E-14 | 8   | 23093155 |
| igsf9ba       | 2.61E-18 | 0.15417241 | 0.186 | 0.016 | 8.50E-14 | 15  | 19131702 |
| hnga1b        | 2.99E-18 | 0.37487605 | 0.302 | 0.04  | 9.71E-14 | 6   | 54142311 |
| inab          | 3.02E-18 | 0.35604838 | 0.186 | 0.017 | 9.81E-14 | 1   | 31864404 |
| gpsm1a        | 3.48E-18 | 0.41586704 | 0.233 | 0.025 | 1.13E-13 | 5   | 64203526 |
| slc2a3a       | 3.99E-18 | 0.24099348 | 0.163 | 0.013 | 1.30E-13 | 19  | 9685165  |
| map7d2a       | 4.15E-18 | 0.34927517 | 0.302 | 0.04  | 1.35E-13 | 5   | 23957572 |
| mafgb         | 4.60E-18 | 0.22662102 | 0.233 | 0.025 | 1.49E-13 | 11  | 45299447 |
| stxbp1a       | 5.09E-18 | 0.60845881 | 0.442 | 0.081 | 1.66E-13 | 21  | 13861589 |
| myt1a         | 5.83E-18 | 1.11393488 | 0.628 | 0.169 | 1.89E-13 | 23  | 30767310 |
| ywhah         | 5.94E-18 | 1.47316556 | 0.907 | 0.502 | 1.93E-13 | 10  | 17166035 |
| rtn1a         | 6.80E-18 | 1.18271321 | 0.86  | 0.37  | 2.21E-13 | 13  | 31424586 |
| stxbp5a       | 8.07E-18 | 0.19915825 | 0.209 | 0.021 | 2.63E-13 | 20  | 31745949 |
| syn2a         | 8.25E-18 | 0.32726081 | 0.233 | 0.025 | 2.68E-13 | 23  | 4751959  |
| dpysl5a       | 8.51E-18 | 0.77720527 | 0.698 | 0.205 | 2.77E-13 | 17  | 36898874 |

|               |          |            |       |       |          |      |          |
|---------------|----------|------------|-------|-------|----------|------|----------|
| sept5a        | 1.16E-17 | 0.54237043 | 0.512 | 0.11  | 3.78E-13 | 8    | 4588398  |
| wbp2          | 1.19E-17 | 0.3064272  | 0.209 | 0.021 | 3.88E-13 | 12   | 45200744 |
| rai1          | 1.67E-17 | 0.22769626 | 0.209 | 0.021 | 5.43E-13 | 3    | 62000822 |
| ckbb          | 1.67E-17 | 1.44203354 | 0.884 | 0.375 | 5.43E-13 | 20   | 20816747 |
| fam219ab      | 2.60E-17 | 0.23457248 | 0.14  | 0.01  | 8.46E-13 | 5    | 26082434 |
| elmo1         | 2.74E-17 | 0.73027057 | 0.651 | 0.184 | 8.93E-13 | 19   | 33887589 |
| atp6v0cb      | 3.61E-17 | 0.98178382 | 0.674 | 0.197 | 1.17E-12 | 24   | 39158283 |
| tspan13b      | 4.04E-17 | 0.33273976 | 0.349 | 0.055 | 1.31E-12 | 19   | 30387999 |
| olfm2a        | 4.09E-17 | 0.23544939 | 0.209 | 0.022 | 1.33E-12 | 3    | 54012708 |
| jam3a         | 4.30E-17 | 0.43164397 | 0.302 | 0.043 | 1.40E-12 | 15   | 19293744 |
| si:dkey-276j7 | 4.55E-17 | 1.29936297 | 0.907 | 0.51  | 1.48E-12 | 6    | 12299188 |
| fsd1          | 4.87E-17 | 0.15601713 | 0.116 | 0.007 | 1.58E-12 | 8    | 18624658 |
| synj1         | 5.03E-17 | 0.19522858 | 0.186 | 0.018 | 1.64E-12 | 10   | 26515946 |
| amph          | 5.08E-17 | 0.33691878 | 0.256 | 0.032 | 1.65E-12 | 2    | 31891335 |
| atp6v1b2      | 5.24E-17 | 0.35660323 | 0.233 | 0.027 | 1.71E-12 | CHR_ | 19525731 |
| atp6ap1a      | 5.37E-17 | 0.42949664 | 0.326 | 0.049 | 1.75E-12 | 23   | 4899238  |
| tmsb          | 6.17E-17 | 1.6148067  | 0.744 | 0.28  | 2.01E-12 | 21   | 26389391 |
| elmo2         | 6.19E-17 | 0.24173173 | 0.14  | 0.01  | 2.01E-12 | 11   | 88247    |
| hrasb         | 6.39E-17 | 0.7214354  | 0.512 | 0.119 | 2.08E-12 | 7    | 49638413 |
| vsnl1a        | 7.07E-17 | 0.30110658 | 0.233 | 0.027 | 2.30E-12 | 20   | 35382482 |
| ptp4a2a       | 7.56E-17 | 0.76453189 | 0.884 | 0.37  | 2.46E-12 | 17   | 14692808 |
| sox4a.1       | 8.20E-17 | 1.58772906 | 0.674 | 0.221 | 2.67E-12 | ###  | #N/A     |
| kif1b         | 1.11E-16 | 0.45615375 | 0.419 | 0.081 | 3.62E-12 | 23   | 29396182 |
| cpe           | 1.45E-16 | 0.5881648  | 0.419 | 0.079 | 4.72E-12 | 1    | 20839482 |
| arl8a         | 1.55E-16 | 0.73874589 | 0.814 | 0.3   | 5.04E-12 | 22   | 710759   |
| adgrb1a       | 2.03E-16 | 0.35315231 | 0.209 | 0.023 | 6.59E-12 | 16   | 37470717 |
| rheb          | 2.59E-16 | 0.48338761 | 0.581 | 0.144 | 8.42E-12 | 24   | 41316714 |
| tspan7b       | 3.24E-16 | 0.58227827 | 0.488 | 0.111 | 1.05E-11 | 22   | 11440705 |
| mtmr7a        | 3.56E-16 | 0.16589755 | 0.116 | 0.008 | 1.16E-11 | 14   | 30398546 |
| map1b         | 6.38E-16 | 0.36046299 | 0.279 | 0.039 | 2.08E-11 | 5    | 35270859 |
| grin2db       | 7.49E-16 | 0.12347049 | 0.14  | 0.011 | 2.44E-11 | 16   | 13179146 |
| katnal1       | 7.58E-16 | 0.30870849 | 0.372 | 0.066 | 2.46E-11 | 10   | 36037977 |
| si:dkey-28b4. | 7.59E-16 | 0.41048566 | 0.372 | 0.067 | 2.47E-11 | 1    | 44651727 |
| cers6         | 7.70E-16 | 0.2683721  | 0.186 | 0.019 | 2.50E-11 | 9    | 48870122 |
| six3a         | 7.80E-16 | 0.86355791 | 0.395 | 0.079 | 2.54E-11 | 13   | 10258007 |
| zc4h2         | 8.47E-16 | 1.10127007 | 0.953 | 0.558 | 2.75E-11 | 5    | 22073710 |
| robo2.1       | 8.60E-16 | 0.55548667 | 0.326 | 0.054 | 2.80E-11 | ###  | #N/A     |
| snap25b       | 1.15E-15 | 0.51172312 | 0.372 | 0.067 | 3.74E-11 | 17   | 12297984 |
| sox5          | 1.15E-15 | 0.53359253 | 0.372 | 0.071 | 3.74E-11 | 4    | 16982249 |
| zgc:101840    | 1.81E-15 | 0.48014494 | 0.419 | 0.084 | 5.90E-11 | 20   | 9428965  |
| vgf           | 1.94E-15 | 0.4267835  | 0.163 | 0.015 | 6.31E-11 | 7    | 26224211 |
| nhlh2         | 2.06E-15 | 0.81606896 | 0.442 | 0.093 | 6.69E-11 | 9    | 32978302 |
| pacsin1a      | 2.10E-15 | 0.31334332 | 0.209 | 0.024 | 6.84E-11 | 23   | 3653386  |

|               |          |            |       |       |          |    |          |
|---------------|----------|------------|-------|-------|----------|----|----------|
| olfm1b        | 2.26E-15 | 0.59239146 | 0.349 | 0.062 | 7.35E-11 | 21 | 6751405  |
| fgf13b        | 2.27E-15 | 0.33458662 | 0.209 | 0.024 | 7.40E-11 | 10 | 26716362 |
| camk2d2       | 2.33E-15 | 0.38419705 | 0.233 | 0.029 | 7.59E-11 | 1  | 14163506 |
| ikzf5         | 2.49E-15 | 0.2981821  | 0.442 | 0.091 | 8.09E-11 | 17 | 21760032 |
| zgc:153426    | 2.67E-15 | 0.24072308 | 0.163 | 0.015 | 8.68E-11 | 3  | 49559261 |
| rab14         | 2.68E-15 | 0.81378503 | 0.86  | 0.427 | 8.72E-11 | 5  | 63390315 |
| pcdh2g5       | 3.21E-15 | 0.65804517 | 0.558 | 0.156 | 1.04E-10 | 14 | 1887677  |
| h2afx1        | 3.24E-15 | 1.08195971 | 1     | 0.889 | 1.05E-10 | 10 | 29816681 |
| erc2          | 3.75E-15 | 0.15434834 | 0.116 | 0.008 | 1.22E-10 | 11 | 37310881 |
| nrsn1         | 4.06E-15 | 0.19176443 | 0.163 | 0.015 | 1.32E-10 | 16 | 221739   |
| dnajc6        | 4.08E-15 | 0.21769033 | 0.209 | 0.024 | 1.33E-10 | 6  | 31279542 |
| oaz1b         | 4.22E-15 | 0.946759   | 1     | 0.873 | 1.37E-10 | 21 | 723998   |
| cbx1b         | 4.54E-15 | 0.72487923 | 0.767 | 0.271 | 1.48E-10 | 12 | 28870462 |
| si:dkey-7f3.9 | 4.61E-15 | 0.1671234  | 0.116 | 0.008 | 1.50E-10 | 16 | 23811554 |
| mapk11        | 4.77E-15 | 0.5689883  | 0.488 | 0.117 | 1.55E-10 | 4  | 5506946  |
| gng2          | 5.87E-15 | 0.981933   | 0.674 | 0.223 | 1.91E-10 | 13 | 12045475 |
| sorcs2        | 6.32E-15 | 0.16216777 | 0.14  | 0.012 | 2.05E-10 | 7  | 39757608 |
| cntnap2b      | 6.97E-15 | 0.21496172 | 0.163 | 0.016 | 2.27E-10 | 2  | 50276755 |
| ap3m2         | 7.03E-15 | 0.53615594 | 0.465 | 0.104 | 2.29E-10 | 5  | 14375108 |
| baalcb        | 9.55E-15 | 0.183971   | 0.116 | 0.008 | 3.11E-10 | 20 | 19579835 |
| tac1          | 9.56E-15 | 1.5600829  | 0.14  | 0.012 | 3.11E-10 | 19 | 25649626 |
| ap3s2         | 1.05E-14 | 0.59647606 | 0.744 | 0.27  | 3.42E-10 | 25 | 10762016 |
| prr12b        | 1.09E-14 | 0.67216884 | 0.605 | 0.179 | 3.54E-10 | 3  | 32425202 |
| zgc:100906    | 1.16E-14 | 0.36329976 | 0.326 | 0.056 | 3.78E-10 | 19 | 26714949 |
| rgs20         | 1.26E-14 | 0.43082237 | 0.256 | 0.037 | 4.11E-10 | 2  | 30752501 |
| gdap1         | 1.30E-14 | 0.17606475 | 0.14  | 0.012 | 4.24E-10 | 24 | 14713776 |
| upf3a         | 1.37E-14 | 0.22306668 | 0.256 | 0.035 | 4.45E-10 | 9  | 34902971 |
| map6b         | 1.68E-14 | 0.29591273 | 0.163 | 0.016 | 5.46E-10 | 15 | 19915345 |
| XKR4          | 1.81E-14 | 0.31851935 | 0.279 | 0.043 | 5.88E-10 | 2  | 27670284 |
| si:dkey-178k: | 2.15E-14 | 0.22642908 | 0.209 | 0.025 | 6.98E-10 | 23 | 11864223 |
| rgmb          | 2.26E-14 | 1.03587907 | 0.558 | 0.167 | 7.36E-10 | 5  | 52256885 |
| lhfp13        | 2.36E-14 | 0.18636329 | 0.163 | 0.016 | 7.67E-10 | 4  | 22365061 |
| dpp6b         | 2.55E-14 | 0.14242007 | 0.116 | 0.009 | 8.28E-10 | 2  | 12406713 |
| pclob         | 2.87E-14 | 0.24659559 | 0.209 | 0.026 | 9.34E-10 | 18 | 9615147  |
| si:ch211-244  | 3.40E-14 | 0.20998919 | 0.163 | 0.016 | 1.11E-09 | 10 | 35537974 |
| zgc:110329    | 3.46E-14 | 0.34733224 | 0.326 | 0.058 | 1.13E-09 | 5  | 28134688 |
| atcaya        | 3.63E-14 | 0.26470101 | 0.395 | 0.077 | 1.18E-09 | 22 | 5103349  |
| nlgn3b        | 3.76E-14 | 0.20357137 | 0.14  | 0.012 | 1.22E-09 | 5  | 23283890 |
| si:dkey-234h: | 3.88E-14 | 0.37794951 | 0.372 | 0.074 | 1.26E-09 | 5  | 19961988 |
| mpnd          | 4.02E-14 | 0.31811468 | 0.349 | 0.064 | 1.31E-09 | 8  | 18830759 |
| tp53bp2b      | 5.01E-14 | 0.15068825 | 0.186 | 0.021 | 1.63E-09 | 22 | 28803739 |
| ssx2ipb       | 5.69E-14 | 0.21779356 | 0.163 | 0.016 | 1.85E-09 | 22 | 24715282 |
| capslb        | 5.80E-14 | 0.15714315 | 0.116 | 0.009 | 1.89E-09 | 21 | 22423286 |

|              |          |            |       |       |          |    |          |
|--------------|----------|------------|-------|-------|----------|----|----------|
| thsd7aa      | 6.54E-14 | 0.3474618  | 0.372 | 0.072 | 2.13E-09 | 19 | 37620342 |
| rab39bb      | 6.92E-14 | 0.34969449 | 0.326 | 0.058 | 2.25E-09 | 7  | 23875269 |
| syng3b       | 7.61E-14 | 0.32982226 | 0.186 | 0.021 | 2.47E-09 | 1  | 8415983  |
| camk2n1a     | 8.62E-14 | 0.61723764 | 0.349 | 0.069 | 2.80E-09 | 2  | 44943396 |
| acsbg2       | 8.79E-14 | 0.66513924 | 0.558 | 0.169 | 2.86E-09 | 8  | 20140321 |
| tuba1c       | 1.05E-13 | 1.32566282 | 0.93  | 0.66  | 3.40E-09 | 23 | 35690657 |
| zgc:64022    | 1.06E-13 | 0.23336245 | 0.163 | 0.017 | 3.44E-09 | 19 | 24123409 |
| bcl11ba      | 1.07E-13 | 0.63871082 | 0.349 | 0.068 | 3.47E-09 | 17 | 18117029 |
| tmem178b     | 1.09E-13 | 0.50955736 | 0.349 | 0.067 | 3.54E-09 | 4  | 12111154 |
| tmem35       | 1.10E-13 | 0.64790549 | 0.721 | 0.268 | 3.57E-09 | 14 | 41276307 |
| appa         | 1.16E-13 | 0.72777138 | 0.837 | 0.437 | 3.76E-09 | 1  | 617620   |
| tmed4        | 1.34E-13 | 0.73554444 | 0.698 | 0.244 | 4.36E-09 | 23 | 33977724 |
| prkag2a      | 1.51E-13 | 0.65369475 | 0.279 | 0.047 | 4.92E-09 | 24 | 28252520 |
| ppdpfb       | 1.61E-13 | 0.90529489 | 1     | 0.889 | 5.25E-09 | 23 | 17427838 |
| kcnn1a       | 2.24E-13 | 0.14594195 | 0.163 | 0.017 | 7.29E-09 | 2  | 24410494 |
| ptbp2b       | 2.48E-13 | 0.67260968 | 0.674 | 0.242 | 8.06E-09 | 2  | 19777146 |
| hmg3a        | 2.93E-13 | 0.96620853 | 0.977 | 0.829 | 9.51E-09 | 7  | 25913225 |
| appb         | 3.04E-13 | 0.86232079 | 0.628 | 0.221 | 9.88E-09 | 9  | 35026415 |
| myo5aa       | 3.32E-13 | 0.18269473 | 0.186 | 0.022 | 1.08E-08 | 18 | 38900092 |
| si:dkey-56m1 | 4.13E-13 | 1.03696789 | 0.86  | 0.526 | 1.34E-08 | 7  | 44713135 |
| atp6v1e1b    | 4.57E-13 | 0.76267745 | 0.721 | 0.289 | 1.49E-08 | 4  | 5240126  |
| tbc1d24      | 4.90E-13 | 0.29454995 | 0.14  | 0.013 | 1.59E-08 | 24 | 39129316 |
| gabapab      | 4.96E-13 | 0.74689968 | 1     | 0.842 | 1.61E-08 | 7  | 69470142 |
| tox2         | 5.18E-13 | 0.55494873 | 0.419 | 0.1   | 1.69E-08 | 6  | 57900237 |
| myl4         | 5.34E-13 | 0.16580502 | 0.116 | 0.009 | 1.74E-08 | 3  | 22222244 |
| rims1a       | 5.71E-13 | 0.18503756 | 0.163 | 0.018 | 1.86E-08 | 13 | 27631926 |
| rac3b        | 5.81E-13 | 0.36570382 | 0.349 | 0.07  | 1.89E-08 | 12 | 3022882  |
| epb41a       | 6.01E-13 | 0.70630703 | 0.791 | 0.347 | 1.95E-08 | 19 | 13639486 |
| tuba1a       | 7.60E-13 | 1.11509223 | 0.907 | 0.646 | 2.47E-08 | 23 | 35708730 |
| kifap3a      | 8.03E-13 | 0.41582528 | 0.419 | 0.097 | 2.61E-08 | 20 | 34420623 |
| aig1         | 9.00E-13 | 0.29970747 | 0.186 | 0.023 | 2.93E-08 | 20 | 37661229 |
| atp6v1g1     | 9.01E-13 | 0.73665635 | 0.837 | 0.403 | 2.93E-08 | 5  | 57320113 |
| snap25a      | 1.08E-12 | 0.32954521 | 0.395 | 0.086 | 3.53E-08 | 20 | 34913069 |
| glrbb        | 1.16E-12 | 0.16977933 | 0.186 | 0.023 | 3.76E-08 | 14 | 35691889 |
| mapk8ip1a    | 1.19E-12 | 0.1623131  | 0.14  | 0.014 | 3.88E-08 | 25 | 13801716 |
| ube2d4       | 1.22E-12 | 0.4883102  | 0.512 | 0.145 | 3.97E-08 | 8  | 52284075 |
| micu3b       | 1.22E-12 | 0.16591981 | 0.163 | 0.018 | 3.98E-08 | 14 | 30453342 |
| st8sia1      | 1.35E-12 | 0.6721986  | 0.512 | 0.151 | 4.38E-08 | 4  | 26303613 |
| magi1b       | 1.61E-12 | 0.81704983 | 0.512 | 0.163 | 5.23E-08 | 11 | 18873113 |
| gabapal2     | 2.67E-12 | 0.64405233 | 0.721 | 0.302 | 8.68E-08 | 25 | 34835553 |
| si:ch211-189 | 2.68E-12 | 0.1157255  | 0.14  | 0.014 | 8.72E-08 | 17 | 23937262 |
| ctnna2       | 2.83E-12 | 0.43782683 | 0.419 | 0.102 | 9.20E-08 | 1  | 42224769 |
| nfasca       | 2.97E-12 | 0.40020952 | 0.395 | 0.089 | 9.65E-08 | 11 | 23704410 |



|               |          |            |       |       |          |    |          |
|---------------|----------|------------|-------|-------|----------|----|----------|
| glcea         | 3.36E-12 | 0.25273871 | 0.163 | 0.019 | 1.09E-07 | 25 | 7918695  |
| scg3          | 3.37E-12 | 0.28853829 | 0.349 | 0.072 | 1.09E-07 | 18 | 39434589 |
| casp3a        | 3.62E-12 | 0.49318148 | 0.488 | 0.139 | 1.18E-07 | 1  | 17527342 |
| zgc:194665    | 4.15E-12 | 0.13032378 | 0.14  | 0.014 | 1.35E-07 | 25 | 19999623 |
| jakmip1       | 4.24E-12 | 0.14263628 | 0.14  | 0.014 | 1.38E-07 | 14 | 17230283 |
| sox4b         | 4.70E-12 | 0.41461456 | 0.326 | 0.066 | 1.53E-07 | 16 | 68069    |
| nbeaa         | 4.75E-12 | 0.4093347  | 0.349 | 0.076 | 1.55E-07 | 10 | 34426256 |
| sox2          | 4.93E-12 | 0.61215197 | 0.535 | 0.166 | 1.60E-07 | 22 | 37347896 |
| pisd          | 6.47E-12 | 0.40748996 | 0.465 | 0.125 | 2.11E-07 | 5  | 57489253 |
| cetn2         | 7.80E-12 | 0.19238953 | 0.186 | 0.025 | 2.54E-07 | 14 | 14662116 |
| stox2a        | 9.23E-12 | 0.33019874 | 0.372 | 0.085 | 3.00E-07 | 1  | 39898327 |
| myo9ab        | 9.69E-12 | 0.29497966 | 0.233 | 0.038 | 3.15E-07 | 25 | 485353   |
| apl1          | 1.01E-11 | 0.57291745 | 0.326 | 0.069 | 3.27E-07 | 15 | 37105986 |
| nol4la        | 1.13E-11 | 0.20836392 | 0.14  | 0.015 | 3.67E-07 | 8  | 23252850 |
| rab36         | 1.13E-11 | 0.15908427 | 0.163 | 0.019 | 3.68E-07 | 10 | 17223681 |
| rnf175        | 1.19E-11 | 0.39233029 | 0.419 | 0.108 | 3.87E-07 | 1  | 10037444 |
| elocb         | 1.28E-11 | 0.68280766 | 0.953 | 0.753 | 4.16E-07 | 2  | 30244376 |
| hnrnpa0a      | 1.33E-11 | 0.93829922 | 0.953 | 0.736 | 4.33E-07 | 14 | 24277556 |
| kif1ab        | 1.34E-11 | 0.21840984 | 0.14  | 0.015 | 4.36E-07 | 2  | 22694382 |
| apc           | 1.35E-11 | 0.56819187 | 0.581 | 0.204 | 4.39E-07 | 10 | 1849874  |
| fundc1        | 1.41E-11 | 0.61142275 | 0.791 | 0.406 | 4.59E-07 | 9  | 33783549 |
| ptp4a1        | 1.43E-11 | 0.89744279 | 0.907 | 0.671 | 4.66E-07 | 11 | 11267493 |
| atp6v1ba      | 1.62E-11 | 0.58810233 | 0.558 | 0.19  | 5.26E-07 | 17 | 21372291 |
| fyna          | 1.66E-11 | 0.52620028 | 0.465 | 0.13  | 5.39E-07 | 17 | 15502964 |
| dnajc5aa      | 1.92E-11 | 0.51567067 | 0.465 | 0.133 | 6.24E-07 | 8  | 23165749 |
| nova2         | 2.37E-11 | 1.09639736 | 0.814 | 0.544 | 7.70E-07 | 15 | 28685625 |
| bcl2l10       | 2.64E-11 | 0.71289368 | 0.744 | 0.364 | 8.58E-07 | 18 | 39106722 |
| lgi1a         | 3.19E-11 | 0.42469734 | 0.488 | 0.142 | 1.04E-06 | 13 | 421231   |
| gapdhs        | 3.24E-11 | 0.91735384 | 0.93  | 0.644 | 1.05E-06 | 16 | 45044642 |
| gpc1a         | 3.32E-11 | 0.36098615 | 0.163 | 0.02  | 1.08E-06 | 22 | 15507218 |
| serinc1       | 3.71E-11 | 0.63525157 | 0.791 | 0.375 | 1.21E-06 | 20 | 40457599 |
| dpysl4        | 3.96E-11 | 0.27307031 | 0.326 | 0.069 | 1.29E-06 | 12 | 41580783 |
| vat1          | 4.09E-11 | 0.94545018 | 0.581 | 0.224 | 1.33E-06 | 3  | 19914332 |
| fkbp1aa       | 5.33E-11 | 0.57993608 | 1     | 0.98  | 1.73E-06 | 8  | 49169768 |
| ctnnd2a       | 5.74E-11 | 0.17815066 | 0.14  | 0.016 | 1.87E-06 | 24 | 22118804 |
| si:ch211-208  | 5.99E-11 | 0.13685072 | 0.163 | 0.02  | 1.95E-06 | 16 | 37166572 |
| fscn1a        | 6.17E-11 | 0.90459433 | 0.767 | 0.39  | 2.01E-06 | 3  | 40576447 |
| abi1b         | 6.21E-11 | 0.29696712 | 0.349 | 0.08  | 2.02E-06 | 2  | 9868601  |
| gphnb         | 6.50E-11 | 0.17699277 | 0.14  | 0.016 | 2.11E-06 | 20 | 50852356 |
| pcdh1g30      | 6.88E-11 | 0.1366794  | 0.14  | 0.016 | 2.24E-06 | 10 | 21801030 |
| si:dkey-110c: | 7.11E-11 | 0.69285876 | 0.791 | 0.37  | 2.31E-06 | 22 | 20246587 |
| iqsec3a       | 7.67E-11 | 0.12424743 | 0.116 | 0.011 | 2.50E-06 | 4  | 26496489 |
| gpm6aa        | 7.94E-11 | 0.78147869 | 0.791 | 0.382 | 2.58E-06 | 14 | 36348549 |

|            |          |            |       |       |          |      |          |
|------------|----------|------------|-------|-------|----------|------|----------|
| aldocb     | 8.09E-11 | 0.53445201 | 0.558 | 0.189 | 2.63E-06 | 21   | 39608637 |
| tspan3b    | 8.23E-11 | 0.24414732 | 0.209 | 0.033 | 2.68E-06 | 7    | 30075245 |
| lrrtm2     | 8.28E-11 | 0.39303091 | 0.233 | 0.04  | 2.69E-06 | 24   | 34606966 |
| tmeff1b    | 8.87E-11 | 0.8617789  | 0.884 | 0.544 | 2.89E-06 | 24   | 33708804 |
| arnt2      | 9.26E-11 | 0.5123682  | 0.488 | 0.152 | 3.01E-06 | 7    | 10701732 |
| syn1       | 9.57E-11 | 0.15523344 | 0.116 | 0.011 | 3.11E-06 | 8    | 31119548 |
| cacng2b    | 1.07E-10 | 0.1505361  | 0.116 | 0.011 | 3.46E-06 | KN14 | 312      |
| BX088596.1 | 1.11E-10 | 0.18763647 | 0.163 | 0.021 | 3.62E-06 | 14   | 32664833 |
| pbx1a      | 1.11E-10 | 0.60107147 | 0.558 | 0.194 | 3.62E-06 | 2    | 18698388 |
| unm_sa1614 | 1.36E-10 | 0.10056854 | 0.116 | 0.011 | 4.44E-06 | 11   | 26476153 |
| abcc5      | 1.48E-10 | 0.14920116 | 0.14  | 0.016 | 4.80E-06 | 18   | 45792035 |
| palm1a     | 1.50E-10 | 0.33593199 | 0.302 | 0.065 | 4.87E-06 | 11   | 14199802 |
| atp6ap2    | 1.53E-10 | 0.6393753  | 0.721 | 0.347 | 4.97E-06 | 22   | 11123487 |
| slc38a7    | 1.74E-10 | 0.26047922 | 0.279 | 0.056 | 5.67E-06 | 7    | 51795667 |
| atp2b1a    | 2.06E-10 | 0.69142094 | 0.628 | 0.263 | 6.69E-06 | 4    | 16076719 |
| kdm5c      | 2.12E-10 | 0.4928869  | 0.837 | 0.385 | 6.88E-06 | 8    | 36983559 |
| kidins220a | 2.21E-10 | 0.33491788 | 0.279 | 0.058 | 7.19E-06 | 17   | 34809643 |
| sprn       | 2.23E-10 | 0.26591203 | 0.163 | 0.022 | 7.27E-06 | 13   | 21682770 |
| hmgn6      | 2.71E-10 | 0.64035567 | 1     | 0.948 | 8.83E-06 | 14   | 9421510  |
| ical1      | 2.73E-10 | 0.12386336 | 0.163 | 0.022 | 8.89E-06 | 6    | 12870744 |
| slc1a4     | 2.97E-10 | 0.43787151 | 0.349 | 0.085 | 9.67E-06 | 13   | 24429918 |
| CR318601.1 | 3.14E-10 | 0.12747837 | 0.116 | 0.012 | 1.02E-05 | 7    | 38573917 |
| kdm6bb     | 3.77E-10 | 0.62796409 | 0.628 | 0.259 | 1.23E-05 | 10   | 22724059 |
| CR376737.1 | 3.90E-10 | 0.16115991 | 0.163 | 0.022 | 1.27E-05 | 24   | 17136749 |
| kdm5bb     | 3.91E-10 | 0.63387552 | 0.651 | 0.285 | 1.27E-05 | 8    | 28305213 |
| CR383676.1 | 4.19E-10 | 0.61229975 | 1     | 0.999 | 1.36E-05 | 14   | 45631236 |
| rnft2      | 4.64E-10 | 0.23282817 | 0.233 | 0.042 | 1.51E-05 | 5    | 11916928 |
| onecut2    | 5.20E-10 | 0.13443338 | 0.14  | 0.017 | 1.69E-05 | 21   | 1698232  |
| fam131bb   | 6.07E-10 | 0.16275564 | 0.116 | 0.012 | 1.97E-05 | 16   | 17389116 |
| cd99l2     | 6.07E-10 | 0.83130891 | 0.744 | 0.402 | 1.97E-05 | 7    | 25878553 |
| sy pb      | 6.08E-10 | 0.3878573  | 0.256 | 0.05  | 1.98E-05 | 8    | 49403668 |
| rcan1a     | 6.38E-10 | 0.45710353 | 0.395 | 0.109 | 2.07E-05 | 9    | 35843732 |
| nptna      | 6.51E-10 | 0.230334   | 0.209 | 0.035 | 2.12E-05 | 25   | 29315924 |
| dynlrb1    | 7.43E-10 | 0.60005891 | 0.93  | 0.755 | 2.42E-05 | 11   | 26604611 |
| ankrd12    | 8.30E-10 | 0.54578565 | 0.628 | 0.27  | 2.70E-05 | 2    | 54696042 |
| zfr        | 8.63E-10 | 0.52128858 | 0.721 | 0.344 | 2.81E-05 | 5    | 41124098 |
| nrxn1a     | 8.66E-10 | 0.50440058 | 0.279 | 0.06  | 2.82E-05 | 12   | 24342303 |
| dab2ipa    | 8.87E-10 | 0.30829253 | 0.326 | 0.078 | 2.89E-05 | 8    | 12134127 |
| calm1a     | 9.52E-10 | 0.74000036 | 0.884 | 0.564 | 3.10E-05 | 17   | 26713111 |
| ing2       | 9.99E-10 | 0.41368931 | 0.558 | 0.201 | 3.25E-05 | 1    | 39981451 |
| klhl8      | 1.01E-09 | 0.23810585 | 0.326 | 0.078 | 3.28E-05 | 21   | 170038   |
| mical3a    | 1.03E-09 | 0.37618537 | 0.326 | 0.081 | 3.34E-05 | 18   | 10784730 |
| zfhx4      | 1.13E-09 | 0.92697343 | 0.698 | 0.325 | 3.69E-05 | 24   | 23241444 |

|              |          |            |       |       |            |     |          |
|--------------|----------|------------|-------|-------|------------|-----|----------|
| marcks1b     | 1.21E-09 | 0.8237856  | 1     | 0.833 | 3.93E-05   | 19  | 29798064 |
| kif1aa       | 1.23E-09 | 0.28888807 | 0.233 | 0.044 | 4.01E-05   | 6   | 27146671 |
| syt11a       | 1.24E-09 | 0.37404579 | 0.372 | 0.099 | 4.02E-05   | 19  | 23982466 |
| tmem59l      | 1.26E-09 | 0.37007611 | 0.349 | 0.089 | 4.11E-05   | 22  | 21128113 |
| lca5         | 1.32E-09 | 0.29428063 | 0.163 | 0.024 | 4.28E-05   | 23  | 31380607 |
| dnajc5ab     | 1.43E-09 | 0.27251335 | 0.349 | 0.089 | 4.66E-05   | 23  | 17472702 |
| slc9a6b      | 1.46E-09 | 0.15072407 | 0.163 | 0.023 | 4.76E-05   | 10  | 26571174 |
| fam110b      | 1.54E-09 | 0.2224153  | 0.279 | 0.059 | 5.02E-05   | 2   | 22208404 |
| zgc:109889   | 1.65E-09 | 0.24981313 | 0.233 | 0.044 | 5.37E-05   | 7   | 23495986 |
| 8-Mar        | 1.69E-09 | 0.33988918 | 0.349 | 0.092 | 5.48E-05   | ### | #N/A     |
| coro1b       | 1.69E-09 | 0.33474011 | 0.349 | 0.09  | 5.51E-05   | 7   | 18617982 |
| sh3glb2b     | 1.71E-09 | 0.41928331 | 0.488 | 0.165 | 5.54E-05   | 5   | 31640881 |
| clip2        | 1.86E-09 | 0.32435966 | 0.419 | 0.12  | 6.03E-05   | 5   | 59392183 |
| ank3b        | 2.03E-09 | 0.26169258 | 0.163 | 0.024 | 6.60E-05   | 17  | 20701582 |
| mpp2a        | 2.20E-09 | 0.29236505 | 0.233 | 0.044 | 7.15E-05   | 3   | 33345347 |
| mapk10       | 2.24E-09 | 0.12620407 | 0.14  | 0.018 | 7.27E-05   | 21  | 9576176  |
| rab41        | 2.28E-09 | 0.43022081 | 0.558 | 0.207 | 7.42E-05   | 14  | 33280718 |
| si:ch211-150 | 2.43E-09 | 0.23923385 | 0.233 | 0.045 | 7.89E-05   | 7   | 32722227 |
| maco1a       | 2.61E-09 | 0.25213758 | 0.302 | 0.071 | 8.48E-05   | 19  | 29303847 |
| apbb1        | 2.77E-09 | 0.24063585 | 0.349 | 0.089 | 9.02E-05   | 10  | 15967341 |
| calr         | 2.97E-09 | 0.79219454 | 0.837 | 0.559 | 9.67E-05   | 8   | 16582339 |
| kmt2cb       | 3.66E-09 | 0.46948617 | 0.721 | 0.349 | 0.00011895 | 2   | 12847602 |
| ezrb         | 3.68E-09 | 0.473876   | 0.488 | 0.175 | 0.00011967 | 20  | 13564931 |
| oaz1a        | 4.20E-09 | 0.5273059  | 0.953 | 0.93  | 0.0001366  | 22  | 20714624 |
| ptmaa        | 4.40E-09 | 1.06664933 | 0.953 | 0.921 | 0.00014322 | 6   | 29754141 |
| fam168a      | 4.56E-09 | 0.6222852  | 0.86  | 0.569 | 0.0001482  | 18  | 2837563  |
| bsnb         | 4.65E-09 | 0.17301409 | 0.186 | 0.031 | 0.0001512  | 11  | 37431693 |
| prr18        | 4.88E-09 | 0.20263335 | 0.14  | 0.019 | 0.00015869 | 13  | 4405282  |
| cdc42        | 4.91E-09 | 0.56995147 | 0.93  | 0.706 | 0.00015957 | 11  | 39120306 |
| fam49al      | 5.46E-09 | 0.5835363  | 0.372 | 0.107 | 0.00017751 | 19  | 30633453 |
| ppp3r1a      | 5.78E-09 | 0.60636521 | 0.488 | 0.18  | 0.0001881  | 13  | 1100197  |
| syt2a        | 5.93E-09 | 0.72304383 | 0.256 | 0.057 | 0.00019276 | 23  | 6232895  |
| rgs17        | 5.97E-09 | 0.11510181 | 0.14  | 0.019 | 0.00019424 | 13  | 23728176 |
| cadm4        | 6.02E-09 | 0.52831549 | 0.349 | 0.096 | 0.00019587 | 16  | 24213078 |
| adcyap1b     | 6.71E-09 | 0.40464233 | 0.326 | 0.082 | 0.00021815 | 2   | 31296644 |
| dnajb11      | 7.25E-09 | 0.65719169 | 0.744 | 0.399 | 0.00023568 | 9   | 32641026 |
| ift80        | 7.25E-09 | 0.23740312 | 0.256 | 0.056 | 0.00023588 | 15  | 1494493  |
| brk1         | 7.36E-09 | 0.69028085 | 0.907 | 0.689 | 0.00023934 | 11  | 36041617 |
| ube2g1a      | 7.58E-09 | 0.4608249  | 0.698 | 0.343 | 0.00024666 | 5   | 30986512 |
| atp1b3b      | 7.90E-09 | 0.40643467 | 0.465 | 0.16  | 0.00025703 | 15  | 4353161  |
| tcp11l1      | 7.98E-09 | 0.17546148 | 0.209 | 0.039 | 0.00025937 | 25  | 15273370 |
| znf219       | 8.35E-09 | 0.23547475 | 0.279 | 0.063 | 0.00027168 | 7   | 73593814 |
| fzd8b        | 8.56E-09 | 0.29416777 | 0.14  | 0.019 | 0.00027842 | 2   | 47955160 |

|               |          |            |       |       |            |     |          |
|---------------|----------|------------|-------|-------|------------|-----|----------|
| man2a2        | 8.96E-09 | 0.39910877 | 0.465 | 0.158 | 0.00029125 | 25  | 8662469  |
| igdcc3        | 9.23E-09 | 0.35303922 | 0.395 | 0.119 | 0.0003001  | 7   | 31494741 |
| prph          | 9.27E-09 | 0.1217375  | 0.116 | 0.014 | 0.00030152 | 11  | 3320598  |
| chd6          | 1.02E-08 | 0.43821977 | 0.558 | 0.216 | 0.00033076 | 6   | 51575924 |
| syt1a         | 1.12E-08 | 0.37070393 | 0.233 | 0.048 | 0.00036563 | 4   | 21129752 |
| phactr3b      | 1.13E-08 | 0.32897044 | 0.256 | 0.057 | 0.0003668  | 11  | 1422737  |
| rassf7b       | 1.17E-08 | 0.27176106 | 0.302 | 0.076 | 0.00037925 | 7   | 49654588 |
| smarcc2       | 1.24E-08 | 0.21865786 | 0.256 | 0.056 | 0.00040259 | 6   | 39836474 |
| celf2         | 1.42E-08 | 0.65270804 | 0.605 | 0.258 | 0.000462   | 4   | 23886726 |
| marcksb       | 1.46E-08 | 0.64997712 | 0.93  | 0.748 | 0.00047592 | 17  | 15534815 |
| samd13        | 1.57E-08 | 0.31791144 | 0.326 | 0.088 | 0.00051077 | 11  | 8152872  |
| 3-Sep         | 1.58E-08 | 0.34224889 | 0.372 | 0.106 | 0.000514   | ### | #N/A     |
| gnb1b         | 1.58E-08 | 0.57540699 | 0.953 | 0.819 | 0.00051463 | 6   | 53304977 |
| kif5bb        | 1.62E-08 | 0.28262899 | 0.349 | 0.094 | 0.00052622 | 12  | 41510492 |
| camk2g2       | 1.65E-08 | 0.40767104 | 0.395 | 0.128 | 0.00053583 | 13  | 22119798 |
| asb8          | 1.72E-08 | 0.46806685 | 0.372 | 0.115 | 0.00055976 | 23  | 27495091 |
| ppp3ca        | 1.80E-08 | 0.24069053 | 0.163 | 0.026 | 0.00058375 | 21  | 28958471 |
| gabarapa      | 1.90E-08 | 0.5211669  | 0.674 | 0.349 | 0.00061762 | 5   | 24059598 |
| gnb1a         | 2.06E-08 | 0.71617391 | 0.907 | 0.708 | 0.00067147 | 8   | 53269657 |
| ywhabl        | 2.17E-08 | 0.55440903 | 1     | 0.876 | 0.00070438 | 16  | 24681177 |
| eif1b         | 2.22E-08 | 0.42831845 | 1     | 0.94  | 0.00072278 | 19  | 5418006  |
| ralaa         | 2.22E-08 | 0.41485024 | 0.395 | 0.128 | 0.00072291 | 24  | 1011158  |
| dcun1d4       | 2.23E-08 | 0.21891987 | 0.233 | 0.049 | 0.00072467 | 20  | 23203946 |
| vma21         | 2.46E-08 | 0.58405345 | 0.791 | 0.465 | 0.00080145 | 5   | 22677786 |
| ppp1r9bb      | 2.60E-08 | 0.17625585 | 0.14  | 0.02  | 0.00084395 | 12  | 9703172  |
| flot1a        | 2.79E-08 | 0.30702874 | 0.279 | 0.069 | 0.00090661 | 19  | 6938289  |
| si:dkey-201i2 | 2.79E-08 | 0.25345317 | 0.163 | 0.026 | 0.00090727 | 14  | 2661646  |
| akr1b1        | 2.80E-08 | 0.6588026  | 0.349 | 0.1   | 0.00091136 | 4   | 14899720 |
| alg9          | 2.86E-08 | 0.3595509  | 0.279 | 0.07  | 0.00093118 | 5   | 57743815 |
| fam57ba       | 2.87E-08 | 0.24608841 | 0.302 | 0.076 | 0.00093335 | 3   | 21044154 |
| brd8          | 3.02E-08 | 0.51804381 | 0.581 | 0.257 | 0.00098226 | 14  | 7697694  |
| rybpa         | 3.04E-08 | 0.32826048 | 0.395 | 0.122 | 0.00098959 | 23  | 10762684 |
| bsg           | 3.09E-08 | 0.5005716  | 1     | 0.854 | 0.00100616 | 22  | 18929412 |
| pcloa         | 3.25E-08 | 0.22339736 | 0.163 | 0.027 | 0.00105638 | 4   | 11375894 |
| mpp2b         | 3.31E-08 | 0.17508689 | 0.14  | 0.02  | 0.001078   | 12  | 10199219 |
| ppp2r1bb      | 3.32E-08 | 0.5704213  | 0.651 | 0.318 | 0.00108121 | 15  | 21744680 |
| ppp3cb        | 3.49E-08 | 0.1074707  | 0.163 | 0.026 | 0.00113648 | 14  | 7789093  |
| rplp1         | 3.67E-08 | -0.2786146 | 1     | 1     | 0.00119475 | 19  | 1852078  |
| hsbp1a        | 3.71E-08 | 0.46876546 | 0.558 | 0.227 | 0.00120532 | 7   | 26629084 |
| ank2b         | 3.73E-08 | 0.61497206 | 0.465 | 0.175 | 0.00121412 | 7   | 57886148 |
| tet3          | 3.77E-08 | 0.42540376 | 0.605 | 0.285 | 0.001225   | 5   | 14306475 |
| tmem53        | 4.00E-08 | 0.35055845 | 0.302 | 0.081 | 0.00130175 | 2   | 32846602 |
| MANEAL        | 4.43E-08 | 0.15369341 | 0.116 | 0.015 | 0.00144027 | 19  | 17259912 |

|               |          |            |       |       |            |    |          |
|---------------|----------|------------|-------|-------|------------|----|----------|
| hnrnpaba      | 4.66E-08 | 0.62020043 | 1     | 0.973 | 0.00151391 | 14 | 6962271  |
| elovl6        | 4.90E-08 | 0.26194762 | 0.302 | 0.08  | 0.00159442 | 14 | 36231126 |
| csnk1e        | 4.90E-08 | 0.24647683 | 0.163 | 0.028 | 0.00159449 | 12 | 19305390 |
| dll4          | 4.90E-08 | 0.21455593 | 0.209 | 0.042 | 0.001595   | 20 | 28245164 |
| rbfox2        | 5.16E-08 | 0.59279212 | 0.721 | 0.373 | 0.0016789  | 6  | 296130   |
| hk1           | 5.24E-08 | 0.45105821 | 0.442 | 0.16  | 0.00170445 | 13 | 22972888 |
| dopey1        | 5.42E-08 | 0.13155468 | 0.14  | 0.021 | 0.0017642  | 16 | 33062570 |
| hivep2a       | 5.70E-08 | 0.1813946  | 0.14  | 0.021 | 0.00185445 | 20 | 37511067 |
| rab11a        | 5.80E-08 | 0.56285017 | 0.814 | 0.491 | 0.00188475 | 18 | 19131773 |
| coro1cb       | 6.35E-08 | 0.52707804 | 0.744 | 0.372 | 0.00206557 | 5  | 31880586 |
| dnm1a         | 7.45E-08 | 0.13499222 | 0.14  | 0.021 | 0.00242227 | 5  | 1278092  |
| pi4k2b        | 7.72E-08 | 0.34974131 | 0.326 | 0.097 | 0.00250972 | 1  | 15258641 |
| ptena         | 7.77E-08 | 0.38339261 | 0.698 | 0.365 | 0.00252699 | 17 | 23650569 |
| sms           | 9.28E-08 | 0.39593059 | 0.372 | 0.122 | 0.00301736 | 21 | 25399133 |
| cotl1         | 9.31E-08 | 0.15130176 | 0.767 | 0.371 | 0.00302841 | 18 | 13203831 |
| smarce1       | 9.89E-08 | 0.64971798 | 0.907 | 0.81  | 0.00321524 | 3  | 34985895 |
| anks1b        | 1.00E-07 | 0.3208038  | 0.233 | 0.054 | 0.0032555  | 4  | 17886838 |
| prdm10        | 1.03E-07 | 0.25630823 | 0.326 | 0.093 | 0.0033407  | 18 | 44320014 |
| nkain2        | 1.05E-07 | 0.12119094 | 0.14  | 0.021 | 0.00342143 | 20 | 39806370 |
| si:dkey-174n: | 1.08E-07 | 0.16453663 | 0.209 | 0.043 | 0.00350156 | 5  | 20922100 |
| cib2          | 1.10E-07 | 0.19305713 | 0.163 | 0.029 | 0.0035749  | 25 | 25666392 |
| cxcr4b        | 1.16E-07 | 0.54313383 | 0.326 | 0.092 | 0.00375904 | 9  | 10692905 |
| zgc:56493     | 1.33E-07 | -0.5558131 | 0.86  | 0.975 | 0.00433785 | 1  | 40263671 |
| kat2b         | 1.34E-07 | 0.13577692 | 0.14  | 0.022 | 0.00434924 | 19 | 20724347 |
| slc16a3       | 1.34E-07 | 0.26178632 | 0.163 | 0.029 | 0.0043677  | 12 | 33350256 |
| g3bp2         | 1.41E-07 | 0.49794534 | 0.512 | 0.207 | 0.00458809 | 1  | 26444986 |
| gnao1b        | 1.44E-07 | 0.26115969 | 0.256 | 0.063 | 0.00466949 | 7  | 29133321 |
| rdh12         | 1.44E-07 | 0.29042832 | 0.186 | 0.037 | 0.00468195 | 13 | 33055548 |
| lmo1          | 1.50E-07 | 0.3677151  | 0.256 | 0.063 | 0.00488517 | 7  | 28109364 |
| cars          | 1.61E-07 | 0.32991749 | 0.512 | 0.198 | 0.00522686 | 7  | 31796237 |
| slc1a2b       | 1.61E-07 | 0.10655575 | 0.326 | 0.091 | 0.00523285 | 25 | 37366698 |
| ube2ql1       | 1.66E-07 | 0.26608023 | 0.209 | 0.046 | 0.0054028  | 19 | 27957119 |
| stap2a        | 1.66E-07 | 0.34100926 | 0.279 | 0.073 | 0.00540705 | 2  | 49522178 |
| ppp3r1b       | 1.70E-07 | 0.50366682 | 0.674 | 0.361 | 0.00552684 | 1  | 51557789 |
| brsk2b        | 1.73E-07 | 0.182422   | 0.186 | 0.036 | 0.00561757 | 7  | 49324103 |
| gpr63         | 1.83E-07 | 0.18064032 | 0.233 | 0.053 | 0.00594556 | 20 | 405811   |
| slc16a9b      | 1.95E-07 | 0.43549698 | 0.442 | 0.167 | 0.00633282 | 12 | 7589193  |
| hacd2         | 2.00E-07 | 0.57521922 | 0.674 | 0.37  | 0.00649965 | 9  | 38029475 |
| si:dkeyp-72g: | 2.00E-07 | 0.11929193 | 0.116 | 0.016 | 0.00651073 | 21 | 32476709 |
| rab6bb        | 2.02E-07 | 0.31101816 | 0.279 | 0.075 | 0.00655857 | 2  | 22795494 |
| ddx5          | 2.14E-07 | 0.420077   | 0.977 | 0.888 | 0.00697033 | 3  | 25269861 |
| pgam1b        | 2.34E-07 | 0.24497257 | 0.233 | 0.055 | 0.00759772 | 1  | 54707667 |
| lrp8          | 2.51E-07 | 0.17498282 | 0.186 | 0.038 | 0.00815694 | 6  | 34511886 |

|               |          |            |       |       |            |    |          |
|---------------|----------|------------|-------|-------|------------|----|----------|
| numbl         | 2.52E-07 | 0.10009851 | 0.14  | 0.022 | 0.00820256 | 15 | 14436159 |
| bcam          | 2.57E-07 | 0.44591646 | 0.419 | 0.148 | 0.00834347 | 16 | 24030272 |
| arhgef10lb    | 2.57E-07 | 0.11172472 | 0.14  | 0.023 | 0.00837172 | 23 | 21544227 |
| apc2          | 2.58E-07 | 0.11295234 | 0.116 | 0.016 | 0.00837708 | 11 | 7281240  |
| plpp5         | 2.61E-07 | 0.32975295 | 0.465 | 0.182 | 0.00848213 | 10 | 20527427 |
| nudt3b        | 2.73E-07 | 0.30085986 | 0.302 | 0.087 | 0.00887348 | 6  | 54154807 |
| kif5c         | 2.84E-07 | 0.1149369  | 0.116 | 0.016 | 0.00923257 | 9  | 23185615 |
| hook1         | 2.85E-07 | 0.12819134 | 0.116 | 0.017 | 0.0092595  | 20 | 25486021 |
| rps8a         | 3.00E-07 | -0.2844549 | 1     | 1     | 0.00976813 | 2  | 26498446 |
| tmem179       | 3.08E-07 | 0.17191935 | 0.14  | 0.023 | 0.01001047 | 20 | 27393668 |
| draxin        | 3.15E-07 | 0.517917   | 0.326 | 0.099 | 0.01023588 | 11 | 15931188 |
| hist2h2l      | 3.17E-07 | 0.51844065 | 0.674 | 0.378 | 0.01031826 | 10 | 29815644 |
| ctbp1         | 3.27E-07 | 0.49983033 | 0.767 | 0.499 | 0.01062196 | 14 | 21820034 |
| tardbp        | 3.34E-07 | 0.64886297 | 0.814 | 0.579 | 0.01084597 | 6  | 45937777 |
| rab2a         | 3.35E-07 | 0.53875845 | 0.93  | 0.697 | 0.01088225 | 2  | 21821683 |
| neo1a         | 3.54E-07 | 0.33810161 | 0.535 | 0.229 | 0.01150429 | 7  | 53754653 |
| shha          | 3.59E-07 | 0.35736986 | 0.186 | 0.038 | 0.01168765 | 7  | 40884012 |
| usf1          | 3.61E-07 | 0.43866994 | 0.628 | 0.302 | 0.01172884 | 15 | 21252532 |
| rab40b        | 3.72E-07 | 0.20120343 | 0.186 | 0.039 | 0.012097   | 12 | 32039177 |
| si:dkey-81117 | 3.72E-07 | 0.33031136 | 0.395 | 0.133 | 0.01210473 | 3  | 16064878 |
| stam          | 3.80E-07 | 0.30788848 | 0.395 | 0.141 | 0.01234759 | 2  | 31437547 |
| stox2b        | 4.00E-07 | 0.34538144 | 0.419 | 0.155 | 0.01301268 | 14 | 7168447  |
| tmem33        | 4.07E-07 | 0.41364732 | 0.744 | 0.416 | 0.01323013 | 14 | 46342882 |
| ilf3b         | 4.07E-07 | 0.51840609 | 0.907 | 0.689 | 0.01323853 | 3  | 13842554 |
| ephb3a        | 4.14E-07 | 0.47960874 | 0.395 | 0.139 | 0.01347108 | 2  | 7923964  |
| acvr2aa       | 4.27E-07 | 0.23527168 | 0.302 | 0.089 | 0.01389491 | 9  | 25380758 |
| cited4a       | 4.28E-07 | 0.28039174 | 0.419 | 0.149 | 0.0139136  | 19 | 15851226 |
| ing4          | 4.47E-07 | 0.58192648 | 0.767 | 0.48  | 0.01453381 | 19 | 9512982  |
| runx1t1       | 4.54E-07 | 0.321551   | 0.233 | 0.057 | 0.01475881 | 19 | 33553586 |
| fmn2b         | 4.69E-07 | 0.15093084 | 0.14  | 0.023 | 0.01526295 | 12 | 47446158 |
| scocb         | 5.05E-07 | 0.42557063 | 0.465 | 0.189 | 0.01642198 | 14 | 48932235 |
| id2a          | 5.20E-07 | 0.59291293 | 0.791 | 0.481 | 0.01692331 | 17 | 34805897 |
| cplx2l        | 5.53E-07 | 0.26119638 | 0.256 | 0.066 | 0.01798037 | 1  | 12262980 |
| cgnb          | 5.82E-07 | 0.18427648 | 0.163 | 0.031 | 0.01892095 | 19 | 7636941  |
| arl6ip1       | 5.99E-07 | 0.33843139 | 0.907 | 0.65  | 0.01948163 | 3  | 31104891 |
| pak1          | 6.10E-07 | 0.28893597 | 0.302 | 0.088 | 0.0198379  | 18 | 3169579  |
| scube1        | 6.13E-07 | 0.15868501 | 0.116 | 0.017 | 0.01992288 | 4  | 8906893  |
| si:ch211-191  | 6.19E-07 | 0.1599759  | 0.256 | 0.066 | 0.02014422 | 20 | 23657860 |
| pank1b        | 6.25E-07 | 0.41091521 | 0.326 | 0.107 | 0.02031396 | 12 | 16953415 |
| ubap2a        | 6.89E-07 | 0.52064833 | 0.628 | 0.34  | 0.02240492 | 21 | 11916788 |
| jag2b         | 7.04E-07 | 0.19549931 | 0.256 | 0.067 | 0.02290773 | 20 | 21391181 |
| dynlt3        | 7.16E-07 | 0.63090664 | 0.86  | 0.594 | 0.02327849 | 11 | 29790626 |
| cxc5b         | 7.43E-07 | 0.34508565 | 0.372 | 0.13  | 0.02417226 | 14 | 7932973  |

|              |          |            |       |       |            |    |          |
|--------------|----------|------------|-------|-------|------------|----|----------|
| gpr107       | 8.30E-07 | 0.28893066 | 0.372 | 0.128 | 0.02700237 | 5  | 32460453 |
| rps2         | 8.31E-07 | -0.2602929 | 1     | 1     | 0.02702278 | 3  | 18398876 |
| gnb5b        | 8.50E-07 | 0.17693425 | 0.14  | 0.024 | 0.02763577 | 18 | 39067575 |
| rnf130       | 8.93E-07 | 0.19634196 | 0.256 | 0.068 | 0.02904486 | 14 | 36765612 |
| ndel1a       | 8.93E-07 | 0.18641816 | 0.233 | 0.058 | 0.0290504  | 12 | 26467847 |
| tspan31      | 9.06E-07 | 0.42707774 | 0.488 | 0.207 | 0.02946858 | 23 | 36730713 |
| nat16        | 9.55E-07 | 0.46285192 | 0.395 | 0.148 | 0.03106908 | 7  | 26132665 |
| ttyh3b       | 9.71E-07 | 0.28272508 | 0.279 | 0.083 | 0.03158821 | 1  | 11781544 |
| pop7         | 9.73E-07 | 0.56453618 | 0.628 | 0.343 | 0.0316291  | 7  | 21887307 |
| tox          | 9.79E-07 | 0.5108453  | 0.721 | 0.412 | 0.03184039 | 2  | 21982911 |
| klf7a        | 9.96E-07 | 0.38511392 | 0.302 | 0.091 | 0.03239106 | 1  | 6403551  |
| atp6v0ca     | 1.01E-06 | 0.4384706  | 0.767 | 0.524 | 0.03287566 | 3  | 16044680 |
| elovl4a      | 1.02E-06 | 0.32607701 | 0.349 | 0.115 | 0.03305444 | 16 | 5156420  |
| reep2        | 1.04E-06 | 0.23460366 | 0.233 | 0.059 | 0.03376597 | 14 | 21596716 |
| ttc26        | 1.04E-06 | 0.23328815 | 0.302 | 0.091 | 0.03380547 | 6  | 7688491  |
| ldb2b        | 1.05E-06 | 0.15272888 | 0.116 | 0.018 | 0.03411837 | 1  | 22805398 |
| atp6v1h      | 1.07E-06 | 0.25887285 | 0.442 | 0.17  | 0.03476374 | 2  | 30786773 |
| bahcc1b      | 1.09E-06 | 0.29912043 | 0.512 | 0.213 | 0.03544316 | 12 | 34561304 |
| dscamb       | 1.19E-06 | 0.13963114 | 0.116 | 0.018 | 0.03882584 | 15 | 6138423  |
| si:ch211-133 | 1.25E-06 | 0.53463843 | 0.767 | 0.503 | 0.04076443 | 19 | 3237790  |
| CABZ010663   | 1.30E-06 | 0.23884583 | 0.209 | 0.051 | 0.04217809 | 4  | 75138640 |
| ccni         | 1.31E-06 | 0.48090878 | 0.93  | 0.712 | 0.04260523 | 21 | 5780888  |
| ywhaz        | 1.31E-06 | 0.55764644 | 0.907 | 0.599 | 0.04263901 | 19 | 12164428 |
| EIF3hb       | 1.31E-06 | 0.14766981 | 0.209 | 0.049 | 0.04263957 | 19 | 45856171 |
| vamp4        | 1.33E-06 | 0.41622212 | 0.372 | 0.133 | 0.04335863 | 20 | 14968031 |
| tle2a        | 1.35E-06 | 0.45099665 | 0.698 | 0.381 | 0.04403407 | 22 | 21618121 |
| baz2ba       | 1.42E-06 | 0.59617977 | 0.558 | 0.274 | 0.04609189 | 6  | 11829867 |
| rab1bb       | 1.44E-06 | 0.49242104 | 0.349 | 0.118 | 0.04673559 | 10 | 26926654 |
| tmsb4x       | 1.44E-06 | 0.12326002 | 1     | 0.977 | 0.04674254 | 9  | 54178475 |
| fam177a1     | 1.49E-06 | 0.33956256 | 0.488 | 0.206 | 0.04854741 | 17 | 13019499 |
| tbx3a        | 1.51E-06 | 0.45582745 | 0.209 | 0.052 | 0.04902258 | 5  | 72316803 |
