# Supplementary material
Source: publisher figshare collection journal article supplement (https://gsajournals.figshare.com/articles/dataset/_/13236983)
Supplement: Supplementary file 10 [file 1]

| Supplemental Table S9: 35dpf trunk RNA-seq data, genes differentially expressed between <i>nr5a1a</i> / <i>nr5a1b</i> double mutants and wildtypes. |             |                |             |              |             |             |                   |                      |                   |
|-----------------------------------------------------------------------------------------------------------------------------------------------------|-------------|----------------|-------------|--------------|-------------|-------------|-------------------|----------------------|-------------------|
| EnsemblID                                                                                                                                           | baseMean    | log2FoldChange | lfcSE       | stat         | pvalue      | padj        | EnsemblGeneName   | ZFIN_ID              | ZFIN_Name         |
| ENSDARG00000092052                                                                                                                                  | 26.05752373 | -5.54485719    | 0.46898847  | -11.82301387 | 2.96841E-32 | 6.15113E-28 | gstk4             | ZDB-GENE-060421-6530 | gstk4             |
| ENSDARG00000075301                                                                                                                                  | 15.78589951 | -5.493938965   | 0.512657424 | -10.71658911 | 8.50834E-27 | 8.81549E-23 | gsdf              | ZDB-GENE-101029-3    | gsdf              |
| ENSDARG00000040510                                                                                                                                  | 9.390766129 | -37.49700026   | 3.604993922 | -10.40140457 | 2.44305E-25 | 1.6875E-21  | ca15b             | ZDB-GENE-040426-2222 | ca15b             |
| ENSDARG00000046053                                                                                                                                  | 62.50326774 | -3.484559178   | 0.360223015 | -9.673338538 | 3.91397E-22 | 2.02763E-18 | slc27a6           | ZDB-GENE-060825-27   | slc27a6           |
| ENSDARG00000045423                                                                                                                                  | 22.06476979 | -26.26188038   | 2.733959049 | -9.605806051 | 7.55643E-22 | 3.13169E-18 | si:ch211-146110.8 | ZDB-GENE-160113-6    | si:ch211-146110.8 |
| ENSDARG00000028396                                                                                                                                  | 530.1083819 | -6.632013912   | 0.69645668  | -9.522507436 | 1.6905E-21  | 5.83842E-18 | fkbp5             | ZDB-GENE-030616-630  | fkbp5             |
| ENSDARG00000028367                                                                                                                                  | 24.46912077 | -3.362684119   | 0.356110886 | -9.442800686 | 3.62946E-21 | 1.07442E-17 | sult2st3          | ZDB-GENE-061117-4    | sult2st3          |
| ENSDARG00000100826                                                                                                                                  | 254.3471364 | -1.625713886   | 0.17455984  | -9.313218227 | 1.24017E-20 | 3.21234E-17 | hif1a1            | ZDB-GENE-040426-1315 | hif1a1            |
| ENSDARG00000077236                                                                                                                                  | 83.05563514 | -2.480500962   | 0.273829557 | -9.058558145 | 1.32186E-19 | 3.04352E-16 | hspb6             | ZDB-GENE-080214-7    | hspb6             |
| ENSDARG00000033566                                                                                                                                  | 5.085319212 | -7.003773479   | 0.793173576 | -8.830064047 | 1.04616E-18 | 2.16785E-15 | cyp17a1           | ZDB-GENE-040213-2    | cyp17a1           |
| ENSDARG00000075191                                                                                                                                  | 16.82518752 | 3.050737367    | 0.350829717 | 8.695778101  | 3.44461E-18 | 6.48902E-15 | oacyl             | ZDB-GENE-090710-2    | oacyl             |
| ENSDARG00000069377                                                                                                                                  | 27.32945936 | -3.831970951   | 0.44340043  | -8.642235532 | 5.51236E-18 | 9.51893E-15 | si:dkey-242g16.2  | ZDB-GENE-030131-8324 | si:dkey-242g16.2  |
| ENSDARG00000045051                                                                                                                                  | 26.51522229 | -3.083873762   | 0.362433193 | -8.508806094 | 1.75733E-17 | 2.80119E-14 | slc16a3           | ZDB-GENE-030131-5487 | slc16a3           |
| ENSDARG00000058556                                                                                                                                  | 271.5131585 | -3.214192227   | 0.379072063 | -8.479106069 | 2.26931E-17 | 3.3589E-14  | muc5.2            | ZDB-GENE-121108-1    | muc5.2            |
| ENSDARG00000060797                                                                                                                                  | 110.737801  | -1.539855366   | 0.184565423 | -8.343141078 | 7.23428E-17 | 9.99391E-14 | pfkmb             | ZDB-GENE-081114-1    | pfkmb             |
| ENSDARG00000092126                                                                                                                                  | 11.67012718 | -6.627611005   | 0.800350913 | -8.280881415 | 1.22267E-16 | 1.58351E-13 | vtg5              | ZDB-GENE-001201-4    | vtg5              |
| ENSDARG00000091260                                                                                                                                  | 132.01416   | -1.569348727   | 0.189753397 | -8.270464485 | 1.33438E-16 | 1.62653E-12 | mylk4a            | ZDB-GENE-120824-2    | mylk4a            |
| ENSDARG00000012968                                                                                                                                  | 185.9436121 | -0.890019404   | 0.107959694 | -8.243997109 | 1.66551E-16 | 1.91737E-13 | rhoub             | ZDB-GENE-050417-308  | rhoub             |
| ENSDARG00000105039                                                                                                                                  | 26.6577159  | -3.138614957   | 0.383205147 | -8.190430063 | 2.60294E-16 | 2.83885E-13 | phka1b            | ZDB-GENE-091204-81   | phka1b            |
| ENSDARG00000001975                                                                                                                                  | 289.4978447 | -1.290576384   | 0.157996524 | -8.168384657 | 3.12546E-16 | 3.23829E-13 | hsd11b2           | ZDB-GENE-030131-6030 | hsd11b2           |
| ENSDARG00000088524                                                                                                                                  | 4.051002146 | -6.874989625   | 0.847893368 | -8.108318666 | 5.1325E-16  | 5.06455E-13 | acot17            | ZDB-GENE-040426-2381 | acot17            |
| ENSDARG00000070714                                                                                                                                  | 9.98505016  | -33.58010325   | 4.152712757 | -8.086305319 | 6.15019E-16 | 5.79292E-13 | zgc:173544        | ZDB-GENE-030131-6229 | zgc:173544        |
| ENSDARG00000093494                                                                                                                                  | 34.30948456 | -2.033662583   | 0.254709799 | -7.984233781 | 1.41398E-15 | 1.27393E-12 | si:ch211-217k17.9 | ZDB-GENE-061207-21   | si:ch211-217k17.9 |
| ENSDARG00000009505                                                                                                                                  | 362.0432403 | -1.449664132   | 0.181777588 | -7.97493324  | 1.52463E-15 | 1.31639E-12 | prelid3b          | ZDB-GENE-031002-13   | prelid3b          |
| ENSDARG00000101749                                                                                                                                  | 211.071462  | 1.41032642     | 0.177451797 | 7.947659256  | 1.90069E-15 | 1.57243E-12 | zgc:92161         | ZDB-GENE-040912-22   | zgc:92161         |
| ENSDARG00000055412                                                                                                                                  | 43.67825506 | -1.944820671   | 0.244967796 | -7.939087117 | 2.03675E-15 | 1.57243E-12 | mylk4b            | ZDB-GENE-041001-128  | mylk4b            |
| ENSDARG00000068194                                                                                                                                  | 97.25695768 | -2.855314868   | 0.359718098 | -7.93764585  | 2.06055E-15 | 1.57243E-12 | kif9              | ZDB-GENE-060526-244  | kif9              |
| ENSDARG00000076520                                                                                                                                  | 26.53038433 | -2.444037638   | 0.308052243 | -7.93384139  | 2.12469E-15 | 1.57243E-12 | mafb              | ZDB-GENE-141211-38   | mafb              |
| ENSDARG00000013522                                                                                                                                  | 2580.434149 | -3.181709413   | 0.406975515 | -7.817938166 | 5.36956E-15 | 3.83683E-12 | pck1              | ZDB-GENE-030909-11   | pck1              |
| ENSDARG00000041699                                                                                                                                  | 9.842091584 | -5.524450833   | 0.707786899 | -7.805245956 | 5.93856E-15 | 4.10196E-12 | piwil1            | ZDB-GENE-030813-2    | piwil1            |
| ENSDARG00000019360                                                                                                                                  | 610.6562594 | -0.952361319   | 0.122170983 | -7.795315206 | 6.42479E-15 | 4.29466E-12 | sec23b            | ZDB-GENE-030131-5479 | sec23b            |
| ENSDARG00000097559                                                                                                                                  | 8.300124602 | -3.46938039    | 0.448527934 | -7.735037496 | 1.03373E-14 | 6.69402E-12 | cyp8b3            | ZDB-GENE-040912-153  | cyp8b3            |
| ENSDARG00000006137                                                                                                                                  | 12.64481614 | -6.228064986   | 0.816077645 | -7.631706399 | 2.31667E-14 | 1.43185E-11 | star              | ZDB-GENE-001120-3    | star              |
| ENSDARG00000071288                                                                                                                                  | 18.08099953 | -2.126846078   | 0.278751435 | -7.629901795 | 2.34933E-14 | 1.43185E-11 | samhd1            | ZDB-GENE-090313-386  | samhd1            |
| ENSDARG00000068372                                                                                                                                  | 9.569120113 | -7.795861532   | 1.024137936 | -7.612120652 | 2.69635E-14 | 1.59639E-11 | zgc:158427        | ZDB-GENE-061215-110  | zgc:158427        |
| ENSDARG00000038639                                                                                                                                  | 20.44349338 | -3.27976828    | 0.431562193 | -7.599758116 | 2.96685E-14 | 1.70775E-11 | elovl6l           | ZDB-GENE-031110-3    | elovl6l           |
| ENSDARG00000079034                                                                                                                                  | 21.34392507 | -5.729743464   | 0.75449807  | -7.594112814 | 3.09908E-14 | 1.73565E-11 | si:dkey-19b23.11  | ZDB-GENE-030131-6199 | si:dkey-19b23.11  |
| ENSDARG00000007465                                                                                                                                  | 7.343648742 | -5.825017443   | 0.769546136 | -7.569419389 | 3.74896E-14 | 2.04437E-11 | tldr1             | ZDB-GENE-070803-1    | tldr1             |
| ENSDARG00000018621                                                                                                                                  | 310.8632036 | -2.40740951    | 0.321890996 | -7.47895883  | 7.49137E-14 | 3.98042E-11 | slc6a19a.1        | ZDB-GENE-070620-2    | slc6a19a.1        |
| ENSDARG00000036180                                                                                                                                  | 11.6321778  | -4.7781521     | 0.641929966 | -7.443416505 | 9.81141E-14 | 5.0828E-11  | ccnb2             | ZDB-GENE-030429-12   | ccnb2             |
| ENSDARG00000027744                                                                                                                                  | 167.5747259 | -2.230812731   | 0.300827632 | -7.415584531 | 1.2109E-13  | 6.12004E-11 | gadd45ba          | ZDB-GENE-040426-1971 | gadd45ba          |
| ENSDARG00000029075                                                                                                                                  | 97.61254822 | -1.310765475   | 0.176899735 | -7.409651986 | 1.26631E-13 | 6.24775E-11 | pfkfb4b           | ZDB-GENE-031031-4    | pfkfb4b           |
| ENSDARG00000041607                                                                                                                                  | 158.3568523 | -1.026248028   | 0.13862312  | -7.403151978 | 1.32989E-13 | 6.40885E-11 | eif4ebp3l         | ZDB-GENE-030826-26   | eif4ebp3l         |
| ENSDARG00000037618                                                                                                                                  | 102.7295178 | -3.424264411   | 0.464434911 | -7.372969447 | 1.66869E-13 | 7.85876E-11 | ddit4             | ZDB-GENE-031002-35   | ddit4             |

|                     |             |              |             |              |             |             |                   |                      |                   |
|---------------------|-------------|--------------|-------------|--------------|-------------|-------------|-------------------|----------------------|-------------------|
| ENSDARG00000074289  | 16.57294797 | -5.684151198 | 0.77679827  | -7.317409703 | 2.52803E-13 | 1.16413E-10 | tuba4l            | ZDB-GENE-030131-5588 | tuba4l            |
| ENSDARG00000000796  | 190.208268  | -1.573081492 | 0.215752792 | -7.291129237 | 3.07368E-13 | 1.38462E-10 | nr4a1             | ZDB-GENE-040704-11   | nr4a1             |
| ENSDARG00000011665  | 2404.031379 | -1.29239652  | 0.177406687 | -7.284936891 | 3.21821E-13 | 1.41889E-10 | aldoaa            | ZDB-GENE-030131-8369 | aldoaa            |
| ENSDARG00000096712  | 145.2698687 | -1.702281973 | 0.23414863  | -7.270091534 | 3.59244E-13 | 1.52797E-10 | si:dkey-193p11.2  | ZDB-GENE-030131-8407 | si:dkey-193p11.2  |
| ENSDARG00000061368  | 130.392681  | -1.316514965 | 0.181105731 | -7.269316978 | 3.6131E-13  | 1.52797E-10 | klf13             | ZDB-GENE-060929-1274 | klf13             |
| ENSDARG00000075666  | 286.2778819 | -1.861028619 | 0.257248516 | -7.234360938 | 4.67726E-13 | 1.93844E-10 | tsc22d3           | ZDB-GENE-040426-1433 | tsc22d3           |
| ENSDARG00000074526  | 38.01897527 | -2.928271405 | 0.407972481 | -7.177619924 | 7.09354E-13 | 2.8822E-10  | zbtb16b           | ZDB-GENE-100923-1    | zbtb16b           |
| ENSDARG00000097556  | 12.12683591 | -2.234915837 | 0.314232057 | -7.112310106 | 1.14116E-12 | 4.54754E-10 | cyp8b2            | ZDB-GENE-080212-9    | cyp8b2            |
| ENSDARG00000026771  | 89.17723123 | -1.29410377  | 0.1826781   | -7.084066294 | 1.39985E-12 | 5.47315E-10 | tmem41ab          | ZDB-GENE-040426-2050 | tmem41ab          |
| ENSDARG00000013856  | 7064.840046 | 1.733774208  | 0.245120574 | 7.073148452  | 1.51457E-12 | 5.81203E-10 | amy2a             | ZDB-GENE-040426-2393 | amy2a             |
| ENSDARG00000013721  | 2181.888068 | -1.651215022 | 0.234681848 | -7.035972484 | 1.97876E-12 | 7.40463E-10 | g6pca.2           | ZDB-GENE-050309-17   | g6pca.2           |
| ENSDARG00000099517  | 448.5743415 | -1.242657189 | 0.176654072 | -7.034410096 | 2.00106E-12 | 7.40463E-10 | adssl1            | ZDB-GENE-040516-18   | adssl1            |
| ENSDARG000000104576 | 178.9488895 | -2.573172624 | 0.369489831 | -6.964122977 | 3.30456E-12 | 1.20135E-09 | si:ch211-152c8.5  | ZDB-GENE-030131-5764 | si:ch211-152c8.5  |
| ENSDARG00000093255  | 17.430777   | -26.0535748  | 3.750936317 | -6.945885666 | 3.76093E-12 | 1.34369E-09 | si:dkey-229d11.3  | ZDB-GENE-091117-40   | si:dkey-229d11.3  |
| ENSDARG00000003820  | 236.1325412 | -2.785263321 | 0.405599331 | -6.867031346 | 6.55517E-12 | 2.30231E-09 | nr1d2a            | ZDB-GENE-040504-1    | nr1d2a            |
| ENSDARG00000095615  | 31.66633725 | -2.12677519  | 0.311629106 | -6.824707579 | 8.81046E-12 | 3.04284E-09 | si:dkeyp-86h10.3  | ZDB-GENE-100922-65   | si:dkeyp-86h10.3  |
| ENSDARG00000055518  | 760.7427117 | -1.407895036 | 0.207274878 | -6.792405573 | 1.10279E-11 | 3.74623E-09 | pygma             | ZDB-GENE-050522-482  | pygma             |
| ENSDARG00000069888  | 106.9338544 | -1.265595583 | 0.186631017 | -6.781271429 | 1.19123E-11 | 3.98139E-09 | cldna             | ZDB-GENE-010328-1    | cldna             |
| ENSDARG000000103038 | 97.76709608 | -1.014177697 | 0.150102891 | -6.756550071 | 1.41316E-11 | 4.64818E-09 | pik3r3a           | ZDB-GENE-040426-1978 | pik3r3a           |
| ENSDARG00000042904  | 331.8452996 | -0.90578088  | 0.135456062 | -6.686898092 | 2.2795E-11  | 7.38061E-09 | foxo3b            | ZDB-GENE-990708-6    | foxo3b            |
| ENSDARG00000014373  | 7.630342945 | -6.264472453 | 0.937226495 | -6.684053944 | 2.32421E-11 | 7.40959E-09 | ddx4              | ZDB-GENE-990415-272  | ddx4 vasa         |
| ENSDARG00000068708  | 207.9882285 | -0.878767789 | 0.131873522 | -6.663716688 | 2.66988E-11 | 8.30409E-09 | ifrd1             | ZDB-GENE-030131-6132 | ifrd1             |
| ENSDARG00000020239  | 299.4418007 | -1.768210126 | 0.265381851 | -6.662890171 | 2.68494E-11 | 8.30409E-09 | lpin1             | ZDB-GENE-080722-2    | lpin1             |
| ENSDARG00000070709  | 30.584484   | -9.929919218 | 1.495174919 | -6.641309384 | 3.10909E-11 | 9.36354E-09 | wu:fi42e03        | ZDB-GENE-030131-6284 | wu:fi42e03        |
| ENSDARG00000096095  | 9.562828454 | -6.314662714 | 0.950875435 | -6.64089373  | 3.11787E-11 | 9.36354E-09 | buc               | ZDB-GENE-070117-694  | buc               |
| ENSDARG000000105346 | 9.045770897 | -32.83261874 | 4.951308003 | -6.631100048 | 3.33194E-11 | 9.8635E-09  | zp.2              | ZDB-GENE-010622-1    | zp.2              |
| ENSDARG00000044010  | 76.68547307 | -1.317528147 | 0.198767991 | -6.628472433 | 3.39178E-11 | 9.89923E-09 | loxl2a            | ZDB-GENE-070818-1    | loxl2a            |
| ENSDARG000000115257 | 18.9305605  | 2.878232777  | 0.43459686  | 6.622764771  | 3.52542E-11 | 1.01463E-08 | si:ch73-338o16.4  | ZDB-GENE-131119-14   | si:ch73-338o16.4  |
| ENSDARG00000031616  | 56.80693832 | -1.440140411 | 0.21807203  | -6.603966645 | 4.003E-11   | 1.1363E-08  | g6pca.1           | ZDB-GENE-031001-4    | g6pca.1           |
| ENSDARG00000014053  | 67.45986768 | -2.1829591   | 0.330973988 | -6.595560922 | 4.23651E-11 | 1.18634E-08 | olfm1b            | ZDB-GENE-040801-228  | olfm1b            |
| ENSDARG00000011122  | 141.8906159 | -1.537470684 | 0.233378489 | -6.58788516  | 4.46135E-11 | 1.23264E-08 | pptc7a            | ZDB-GENE-041114-74   | pptc7a            |
| ENSDARG00000030604  | 41.90260072 | -1.30012524  | 0.19760085  | -6.579552884 | 4.71865E-11 | 1.28658E-08 | phkg1a            | ZDB-GENE-061103-385  | phkg1a            |
| ENSDARG00000011618  | 101.6020293 | -1.503829328 | 0.229688247 | -6.547262855 | 5.86012E-11 | 1.57706E-08 | slc26a2           | ZDB-GENE-030717-3    | slc26a2           |
| ENSDARG00000043154  | 277.2062963 | -1.058203465 | 0.161861149 | -6.537723672 | 6.24622E-11 | 1.65941E-08 | ucp2              | ZDB-GENE-990708-8    | ucp2              |
| ENSDARG00000087303  | 376.4473634 | -1.305305118 | 0.199975768 | -6.527316442 | 6.69585E-11 | 1.75635E-08 | cebpd             | ZDB-GENE-020111-4    | cebpd             |
| ENSDARG00000070052  | 9.515912892 | -3.461847514 | 0.532267133 | -6.503966334 | 7.82294E-11 | 2.02634E-08 | tldr6             | ZDB-GENE-041001-210  | tldr6             |
| ENSDARG00000015611  | 34.07155095 | -1.385331788 | 0.217298131 | -6.375258655 | 1.82654E-10 | 4.6728E-08  | rasl11b           | ZDB-GENE-040426-793  | rasl11b           |
| ENSDARG000000100528 | 4.811134859 | -6.61828948  | 1.041757592 | -6.353003359 | 2.11151E-10 | 5.33594E-08 | map1lc3c          | ZDB-GENE-040426-1080 | map1lc3c          |
| ENSDARG00000058371  | 7784.575101 | -0.960324138 | 0.15176288  | -6.327793308 | 2.48692E-10 | 6.20891E-08 | krt5              | ZDB-GENE-991110-23   | krt5              |
| ENSDARG00000086856  | 56.76127004 | -1.278502966 | 0.202184314 | -6.32345281  | 2.55782E-10 | 6.30991E-08 | stk35             | ZDB-GENE-061103-553  | stk35             |
| ENSDARG00000097877  | 164.6195781 | -0.801172969 | 0.126986377 | -6.309125341 | 2.80617E-10 | 6.84111E-08 | si:ch211-167b20.8 | ZDB-GENE-081104-147  | si:ch211-167b20.8 |
| ENSDARG00000069498  | 13.38539347 | -1.772583138 | 0.282026695 | -6.285160826 | 3.27514E-10 | 7.89158E-08 | phkg1b            | ZDB-GENE-050522-52   | phkg1b            |
| ENSDARG00000069926  | 1.996948122 | -5.253830076 | 0.836708515 | -6.27916411  | 3.40398E-10 | 8.10774E-08 | hsd3b1            | ZDB-GENE-081105-30   | hsd3b1            |
| ENSDARG00000033140  | 19.26124149 | -1.847264856 | 0.294292223 | -6.276974764 | 3.45224E-10 | 8.12924E-08 | desi1a            | ZDB-GENE-040426-1657 | desi1a            |
| ENSDARG000000100352 | 115.3934128 | -1.70640924  | 0.27211358  | -6.2709448   | 3.58864E-10 | 8.35548E-08 | aglb              | ZDB-GENE-050309-54   | aglb              |
| ENSDARG00000069381  | 26.06185693 | 3.846613473  | 0.615298837 | 6.251618302  | 4.06221E-10 | 9.35302E-08 | si:ch211-125e6.5  | ZDB-GENE-070912-39   | si:ch211-125e6.5  |

|                    |             |              |             |              |             |             |                   |                      |                   |
|--------------------|-------------|--------------|-------------|--------------|-------------|-------------|-------------------|----------------------|-------------------|
| ENSDARG00000020298 | 119.7201683 | -1.61389447  | 0.260020675 | -6.206792875 | 5.40768E-10 | 1.23141E-07 | btg2              | ZDB-GENE-000210-15   | btg2              |
| ENSDARG00000069735 | 21.67953976 | -3.758726954 | 0.607821533 | -6.183931874 | 6.25244E-10 | 1.40783E-07 | hbaa2             | ZDB-GENE-081104-38   | hbaa2             |
| ENSDARG00000097959 | 167.2246746 | -1.811240398 | 0.292972975 | -6.182278062 | 6.31831E-10 | 1.40783E-07 | si:dkey-248g15.3  | ZDB-GENE-131127-95   | si:dkey-248g15.3  |
| ENSDARG00000087188 | 458.710279  | -1.53415809  | 0.248282479 | -6.17908317  | 6.44749E-10 | 1.42133E-07 | nfil3-6           | ZDB-GENE-040704-63   | nfil3-6           |
| ENSDARG00000088762 | 7.59543125  | -2.428237715 | 0.394088268 | -6.161659483 | 7.19865E-10 | 1.57022E-07 | si:ch211-224l10.4 | ZDB-GENE-090312-125  | si:ch211-224l10.4 |
| ENSDARG00000041433 | 553.2621876 | -1.822257751 | 0.296027972 | -6.155694481 | 7.47492E-10 | 1.61349E-07 | si:dkey-7c18.24   | ZDB-GENE-041014-63   | si:dkey-7c18.24   |
| ENSDARG00000007184 | 36.17916022 | -2.085442995 | 0.339288584 | -6.146516834 | 7.92029E-10 | 1.692E-07   | zbtb16a           | ZDB-GENE-030131-1989 | zbtb16a           |
| ENSDARG00000034600 | 116.7635806 | -0.682732697 | 0.111286548 | -6.134907664 | 8.52087E-10 | 1.80173E-07 | tmem165           | ZDB-GENE-030131-3222 | tmem165           |
| ENSDARG00000095281 | 45.24238569 | -11.68848782 | 1.911892489 | -6.113569611 | 9.74268E-10 | 2.03927E-07 | zgc:152652        | ZDB-GENE-060818-27   | zgc:152652        |
| ENSDARG00000056141 | 226.4510902 | -0.672873856 | 0.110145274 | -6.108967093 | 1.00278E-09 | 2.07796E-07 | coq10b            | ZDB-GENE-050417-263  | coq10b            |
| ENSDARG00000054978 | 175.347479  | 1.112136707  | 0.184894282 | 6.014987019  | 1.79901E-09 | 3.691E-07   | kifc3             | ZDB-GENE-030131-3724 | kifc3             |
| ENSDARG00000013453 | 4.703768791 | -4.22563219  | 0.705652421 | -5.98826287  | 2.12094E-09 | 4.30884E-07 | tdrd9             |                      |                   |
| ENSDARG00000039828 | 9.65399588  | -6.119102629 | 1.024527449 | -5.972609746 | 2.33488E-09 | 4.69742E-07 | zp3b              | ZDB-GENE-031124-2    | zp3b              |
| ENSDARG00000019706 | 9.293315543 | -6.193729972 | 1.04040734  | -5.953177887 | 2.62985E-09 | 5.23998E-07 | zar1              | ZDB-GENE-030818-1    | zar1              |
| ENSDARG00000042807 | 134.0536702 | -1.037358129 | 0.174354126 | -5.949719426 | 2.68603E-09 | 5.30093E-07 | slc16a4           | ZDB-GENE-070112-602  | slc16a4           |
| ENSDARG00000069630 | 882.3899949 | 1.051567087  | 0.177300628 | 5.930983433  | 3.01126E-09 | 5.88672E-07 | tat               | ZDB-GENE-030131-1144 | tat               |
| ENSDARG00000014039 | 4.000310908 | -4.926383797 | 0.831589671 | -5.924056018 | 3.14096E-09 | 6.0829E-07  | si:dkeyp-93d12.1  | ZDB-GENE-041014-303  | si:dkeyp-93d12.1  |
| ENSDARG00000116430 | 5.118997162 | -3.091474444 | 0.525310084 | -5.885046831 | 3.97941E-09 | 7.63531E-07 | si:ch73-329n5.2   | ZDB-GENE-131121-66   | si:ch73-329n5.2   |
| ENSDARG00000014357 | 3.385509596 | -4.86613215  | 0.828481265 | -5.873557261 | 4.26542E-09 | 8.10899E-07 | amh               | ZDB-GENE-050706-192  | amh               |
| ENSDARG00000095434 | 14.43394992 | -2.347673994 | 0.40014516  | -5.867055837 | 4.43601E-09 | 8.35664E-07 | si:ch211-217k17.8 | ZDB-GENE-031010-46   | si:ch211-217k17.8 |
| ENSDARG00000055118 | 175.969061  | -1.096436745 | 0.187447345 | -5.84930528  | 4.9363E-09  | 9.21532E-07 | mylipb            | ZDB-GENE-061027-67   | mylipb            |
| ENSDARG00000069758 | 3.849424386 | -5.91578918  | 1.011707827 | -5.847329655 | 4.99527E-09 | 9.24214E-07 | si:dkey-189g17.2  | ZDB-GENE-030131-5562 | si:dkey-189g17.2  |
| ENSDARG00000008454 | 9.086910879 | -5.244104528 | 0.897409828 | -5.843600509 | 5.10845E-09 | 9.36789E-07 | cpeb1b            | ZDB-GENE-990927-1    | cpeb1b            |
| ENSDARG00000069251 | 24.82923085 | -8.097964965 | 1.389611695 | -5.827502024 | 5.62632E-09 | 1.02271E-06 | si:dkeyp-50f7.2   | ZDB-GENE-030131-5968 | si:dkeyp-50f7.2   |
| ENSDARG00000056387 | 4.087708094 | -4.435165405 | 0.76149893  | -5.824256914 | 5.73673E-09 | 1.03371E-06 | rnf17             | ZDB-GENE-030131-6451 | rnf17             |
| ENSDARG00000069734 | 26.05122144 | -3.871103173 | 0.665735882 | -5.814773216 | 6.07161E-09 | 1.08462E-06 | hbba2             | ZDB-GENE-040801-164  | hbba2             |
| ENSDARG00000102146 | 120.8441344 | -2.72581746  | 0.47016855  | -5.797532529 | 6.72977E-09 | 1.19192E-06 | si:ch211-69b7.6   | ZDB-GENE-141212-266  | si:ch211-69b7.6   |
| ENSDARG00000079308 | 67.30386855 | -1.594766025 | 0.275175157 | -5.795457852 | 6.8135E-09  | 1.19652E-06 | tor3a             | ZDB-GENE-081104-165  | tor3a             |
| ENSDARG00000036214 | 1.847073678 | -5.743928733 | 0.992770763 | -5.785755329 | 7.21872E-09 | 1.25703E-06 | dazl              | ZDB-GENE-000405-6    | dazl              |
| ENSDARG00000099060 | 24.91848828 | -9.349301885 | 1.619178676 | -5.774101416 | 7.73648E-09 | 1.33596E-06 | zgc:111868        | ZDB-GENE-050809-138  | zgc:111868        |
| ENSDARG00000100599 | 35.19697253 | 1.204734711  | 0.209312964 | 5.755662169  | 8.63028E-09 | 1.47799E-06 | c1s               | ZDB-GENE-030131-1232 | c1s               |
| ENSDARG00000020645 | 132.314852  | -1.137437959 | 0.197967833 | -5.745569587 | 9.16121E-09 | 1.55605E-06 | slc7a3a           | ZDB-GENE-041114-206  | slc7a3a           |
| ENSDARG00000036967 | 78.78671247 | -0.921151659 | 0.162099441 | -5.682633146 | 1.32637E-08 | 2.23455E-06 | smox              | ZDB-GENE-031201-3    | smox              |
| ENSDARG00000062601 | 5.403200956 | -3.860202804 | 0.681882529 | -5.661096507 | 1.50409E-08 | 2.51353E-06 | piwil2            | ZDB-GENE-060526-345  | piwil2            |
| ENSDARG00000101251 | 1274.265908 | -0.769453015 | 0.136214738 | -5.648823505 | 1.6155E-08  | 2.6781E-06  | ldha              | ZDB-GENE-991026-5    | ldha              |
| ENSDARG00000089724 | 21.815473   | -1.960338692 | 0.347694189 | -5.638111747 | 1.71925E-08 | 2.82748E-06 | cyldb             | ZDB-GENE-100208-1    | cyldb             |
| ENSDARG00000061994 | 748.3631622 | -0.802285354 | 0.142597269 | -5.626232268 | 1.84188E-08 | 3.00531E-06 | acacb             | ZDB-GENE-060526-132  | acacb             |
| ENSDARG0000000887  | 4.401186429 | -3.723977017 | 0.663398573 | -5.61348361  | 1.98293E-08 | 3.21018E-06 | zgc:56699         | ZDB-GENE-040426-2099 | zgc:56699         |
| ENSDARG00000020749 | 8.084687246 | -4.971841421 | 0.886865694 | -5.606081568 | 2.06958E-08 | 3.32449E-06 | caprin2           | ZDB-GENE-040812-2    | caprin2           |
| ENSDARG00000101362 | 68.95832242 | -1.214135074 | 0.217590694 | -5.579903497 | 2.40652E-08 | 3.83599E-06 | mibp              | ZDB-GENE-030404-1    | mibp              |
| ENSDARG00000019417 | 59.63933557 | -1.521249188 | 0.273334326 | -5.565525594 | 2.61363E-08 | 4.13433E-06 | gadd45ga          | ZDB-GENE-040426-1882 | gadd45ga          |
| ENSDARG00000074258 | 28.43671042 | 1.502985155  | 0.270762592 | 5.550933546  | 2.84148E-08 | 4.4546E-06  | gramd1bb          | ZDB-GENE-140106-106  | gramd1bb          |
| ENSDARG00000102572 | 70.05706488 | -1.270912006 | 0.228999205 | -5.549853349 | 2.85909E-08 | 4.4546E-06  | si:ch211-260e23.9 | ZDB-GENE-141222-48   | si:ch211-260e23.9 |
| ENSDARG00000060112 | 5.556578412 | -3.73009865  | 0.673038441 | -5.542177714 | 2.98733E-08 | 4.61966E-06 | sybu              | ZDB-GENE-060929-1202 | sybu              |
| ENSDARG00000093584 | 40.98829869 | -2.080133723 | 0.375801305 | -5.535195583 | 3.10881E-08 | 4.77191E-06 | zgc:193505        | ZDB-GENE-030131-7103 | zgc:193505        |
| ENSDARG00000033170 | 29.11207634 | -1.121551037 | 0.202701975 | -5.533004989 | 3.14791E-08 | 4.79639E-06 | sult2st1          | ZDB-GENE-030219-114  | sult2st1          |

|                    |             |              |             |              |             |             |                  |                      |                  |
|--------------------|-------------|--------------|-------------|--------------|-------------|-------------|------------------|----------------------|------------------|
| ENSDARG00000088813 | 81.85010095 | -1.272200891 | 0.230040948 | -5.530323638 | 3.19641E-08 | 4.83474E-06 | ppp1r3ab         | ZDB-GENE-050309-246  | ppp1r3ab         |
| ENSDARG00000091234 | 36.40978774 | -1.596416918 | 0.289181856 | -5.52046018  | 3.38113E-08 | 5.07709E-06 | si:ch73-335i21.4 | ZDB-GENE-160728-105  | si:ch73-335i21.4 |
| ENSDARG00000101557 | 144.4577058 | -1.122996707 | 0.203897004 | -5.507666544 | 3.63621E-08 | 5.42084E-06 | scarb1           | ZDB-GENE-031126-1    | scarb1           |
| ENSDARG00000070426 | 961.9570551 | -1.124344664 | 0.204190474 | -5.506352203 | 3.66345E-08 | 5.42243E-06 | chac1            | ZDB-GENE-030131-1957 | chac1            |
| ENSDARG00000057241 | 56.33101744 | 1.091401965  | 0.198449261 | 5.49965246   | 3.80541E-08 | 5.5926E-06  | tnfsf10          | ZDB-GENE-040718-335  | tnfsf10          |
| ENSDARG00000015657 | 14.01905667 | -2.53530529  | 0.461185988 | -5.497359759 | 3.8552E-08  | 5.62587E-06 | zgc:77112        | ZDB-GENE-040426-2219 | zgc:77112        |
| ENSDARG00000007869 | 65.70277949 | -0.79184632  | 0.144170664 | -5.492423329 | 3.96456E-08 | 5.745E-06   | ehd3             | ZDB-GENE-041014-352  | ehd3             |
| ENSDARG00000067741 | 231.8302681 | -0.791213873 | 0.144161123 | -5.488399774 | 4.05591E-08 | 5.83657E-06 | itpkcb           | ZDB-GENE-080225-27   | itpkcb           |
| ENSDARG00000040253 | 62.46944014 | -1.712152059 | 0.31267919  | -5.475746743 | 4.3567E-08  | 6.22618E-06 | onecutl          | ZDB-GENE-020531-1    | onecutl          |
| ENSDARG00000035869 | 920.6705713 | -0.501272508 | 0.091603687 | -5.472187037 | 4.44515E-08 | 6.30907E-06 | azin1b           | ZDB-GENE-030121-1    | azin1b           |
| ENSDARG00000037995 | 6.38186848  | -4.661973415 | 0.852640363 | -5.467690271 | 4.55938E-08 | 6.42717E-06 | gdf3             | ZDB-GENE-980526-389  | gdf3             |
| ENSDARG00000020114 | 151.9891844 | -1.071305294 | 0.196431888 | -5.453825765 | 4.92975E-08 | 6.90232E-06 | slc20a1a         | ZDB-GENE-040426-2217 | slc20a1a         |
| ENSDARG00000041787 | 662.8261113 | -0.823328956 | 0.151015995 | -5.451932119 | 4.98255E-08 | 6.92942E-06 | cx32.3           | ZDB-GENE-030131-1337 | cx32.3           |
| ENSDARG00000007682 | 758.4870963 | -1.242200547 | 0.228345782 | -5.439997769 | 5.32812E-08 | 7.35333E-06 | ppdpfa           | ZDB-GENE-030219-204  | ppdpfa           |
| ENSDARG00000069100 | 2794.524127 | 0.61085324   | 0.11231004  | 5.438990476  | 5.35833E-08 | 7.35333E-06 | aldh9a1a.1       | ZDB-GENE-030131-1257 | aldh9a1a.1       |
| ENSDARG00000089885 | 53.83462165 | -1.499666855 | 0.276005553 | -5.43346624  | 5.52697E-08 | 7.53487E-06 | slc16a12b        | ZDB-GENE-050522-80   | slc16a12b        |
| ENSDARG00000012981 | 35.31998732 | -1.42035821  | 0.261496881 | -5.43164493  | 5.58369E-08 | 7.56244E-06 | osbpl7           | ZDB-GENE-041010-212  | osbpl7           |
| ENSDARG00000101652 | 16.96255046 | -1.938478904 | 0.357970474 | -5.415192152 | 6.12229E-08 | 8.23806E-06 | haus6            | ZDB-GENE-030131-5517 | haus6            |
| ENSDARG00000099719 | 14.67071504 | -2.30147602  | 0.425263751 | -5.411879134 | 6.23668E-08 | 8.33784E-06 | cdkn1d           | ZDB-GENE-110215-1    | cdkn1d           |
| ENSDARG00000101849 | 443.5503324 | -0.752165613 | 0.139093329 | -5.407632564 | 6.38633E-08 | 8.48317E-06 | adipor2          | ZDB-GENE-041210-60   | adipor2          |
| ENSDARG00000010266 | 189.2263969 | -0.939300191 | 0.173971675 | -5.399155888 | 6.69552E-08 | 8.83723E-06 | igf2bp3          | ZDB-GENE-000308-1    | igf2bp3          |
| ENSDARG00000055342 | 77.25562655 | -1.144236949 | 0.212065729 | -5.395671208 | 6.82679E-08 | 8.95346E-06 | slc16a13         | ZDB-GENE-120907-2    | slc16a13         |
| ENSDARG00000034048 | 31.16008113 | 1.286720912  | 0.239003213 | 5.383697139  | 7.29712E-08 | 9.51013E-06 | zgc:92275        | ZDB-GENE-040718-356  | zgc:92275        |
| ENSDARG00000003017 | 84.11291049 | -0.679127981 | 0.127084605 | -5.343904418 | 9.09655E-08 | 1.17812E-05 | ube2a1           | ZDB-GENE-030131-4195 | ube2a1           |
| ENSDARG00000002271 | 163.1787692 | -0.848886823 | 0.159059898 | -5.336900324 | 9.4549E-08  | 1.21692E-05 | zfand5b          | ZDB-GENE-040426-875  | zfand5b          |
| ENSDARG00000079467 | 9.566629182 | -2.197004882 | 0.411812964 | -5.334958031 | 9.55667E-08 | 1.22243E-05 | si:ch73-15b2.5   | ZDB-GENE-030131-5406 | si:ch73-15b2.5   |
| ENSDARG00000100003 | 177.9191593 | -0.975639496 | 0.183022298 | -5.330713825 | 9.78275E-08 | 1.24367E-05 | glulb            | ZDB-GENE-030131-8417 | glulb            |
| ENSDARG00000003701 | 5.354620319 | -6.927448581 | 1.308715065 | -5.293320729 | 1.20115E-07 | 1.5177E-05  | cldng            | ZDB-GENE-010328-7    | cldng            |
| ENSDARG00000116617 | 140.6580518 | -0.857268872 | 0.162247749 | -5.283702708 | 1.26599E-07 | 1.58993E-05 | spaca4l          | ZDB-GENE-101011-2    | spaca4l          |
| ENSDARG00000028804 | 135.6242268 | -1.079103076 | 0.204944413 | -5.26534518  | 1.39926E-07 | 1.74672E-05 | ankrd9           | ZDB-GENE-041114-3    | ankrd9           |
| ENSDARG00000035957 | 19.98072838 | -2.18167153  | 0.415127685 | -5.255422864 | 1.47685E-07 | 1.83253E-05 | gmnn             | ZDB-GENE-030429-30   | gmnn             |
| ENSDARG00000059646 | 107.7855135 | -0.768929194 | 0.14642895  | -5.251210195 | 1.51103E-07 | 1.86379E-05 | nt5dc2           | ZDB-GENE-060810-17   | nt5dc2           |
| ENSDARG00000035719 | 47.81105902 | -1.794218458 | 0.342157068 | -5.243844503 | 1.57265E-07 | 1.92831E-05 | arl5c            | ZDB-GENE-040426-1866 | arl5c            |
| ENSDARG00000029497 | 46.63571565 | -1.620986592 | 0.309220772 | -5.242165925 | 1.58703E-07 | 1.92985E-05 | tfcp2l1          | ZDB-GENE-040704-58   | tfcp2l1          |
| ENSDARG00000016545 | 82.18082003 | -0.78572376  | 0.149906534 | -5.241424361 | 1.59342E-07 | 1.92985E-05 | zgc:154046       | ZDB-GENE-061103-289  | zgc:154046       |
| ENSDARG00000109626 | 24.11569778 | -1.762837056 | 0.336390293 | -5.240451619 | 1.60184E-07 | 1.92985E-05 | si:ch211-226h7.3 | ZDB-GENE-130531-9    | si:ch211-226h7.3 |
| ENSDARG00000115978 | 13.24877026 | -4.058921686 | 0.775911882 | -5.231163205 | 1.68447E-07 | 2.01766E-05 | AL935186.9       |                      |                  |
| ENSDARG00000025218 | 78.43560954 | -0.676634824 | 0.129621373 | -5.220086845 | 1.78839E-07 | 2.12983E-05 | myo5ab           | ZDB-GENE-050411-72   | myo5ab           |
| ENSDARG00000042667 | 576.2979129 | -1.448999857 | 0.277785067 | -5.216262601 | 1.82569E-07 | 2.16183E-05 | klf2a            | ZDB-GENE-011109-1    | klf2a            |
| ENSDARG00000016143 | 127.8139121 | -0.784682157 | 0.150598778 | -5.210415161 | 1.88419E-07 | 2.21841E-05 | xiap             | ZDB-GENE-030825-7    | xiap             |
| ENSDARG00000097205 | 244.3177908 | -1.013005774 | 0.194565246 | -5.206509357 | 1.92426E-07 | 2.2528E-05  | ulk2             | ZDB-GENE-090218-30   | ulk2             |
| ENSDARG00000021439 | 691.9110344 | -0.538635307 | 0.103507382 | -5.203834729 | 1.95218E-07 | 2.27264E-05 | ncoa4            | ZDB-GENE-040426-689  | ncoa4            |
| ENSDARG00000007086 | 193.6672324 | -1.159309909 | 0.223140126 | -5.195434499 | 2.04242E-07 | 2.35301E-05 | aqp10a           | ZDB-GENE-040718-40   | aqp10a           |
| ENSDARG00000069946 | 300.5415561 | -0.88685318  | 0.170703058 | -5.195297541 | 2.04393E-07 | 2.35301E-05 | itga6b           | ZDB-GENE-050320-5    | itga6b           |
| ENSDARG00000012199 | 111.2853656 | -1.012722462 | 0.195550905 | -5.178817577 | 2.23297E-07 | 2.55644E-05 | gpt2             | ZDB-GENE-030729-8    | gpt2             |
| ENSDARG00000039208 | 103.3672746 | -1.628752866 | 0.31476391  | -5.174522289 | 2.28495E-07 | 2.60158E-05 | nasp             | ZDB-GENE-030131-5511 | nasp             |

|                    |             |              |             |              |             |             |                   |                      |                   |
|--------------------|-------------|--------------|-------------|--------------|-------------|-------------|-------------------|----------------------|-------------------|
| ENSDARG00000100792 | 1075.127895 | -1.276844706 | 0.246882653 | -5.171868855 | 2.31764E-07 | 2.62009E-05 | zgc:154142        | ZDB-GENE-070615-2    | zgc:154142        |
| ENSDARG00000112959 | 360.547733  | -0.965354075 | 0.186702721 | -5.170541018 | 2.33417E-07 | 2.62009E-05 | CABZ01072309.1    |                      |                   |
| ENSDARG00000103428 | 398.4902431 | -0.687091449 | 0.132896013 | -5.170143445 | 2.33914E-07 | 2.62009E-05 | ogdhh             | ZDB-GENE-090311-8    | ogdhh             |
| ENSDARG00000091209 | 71.94187003 | -1.769691415 | 0.342780334 | -5.162756556 | 2.4334E-07  | 2.71101E-05 | ucp3              | ZDB-GENE-040426-1317 | ucp3              |
| ENSDARG00000090768 | 16.57710413 | -9.447299071 | 1.834149504 | -5.150779177 | 2.59406E-07 | 2.87456E-05 | zp3.2             | ZDB-GENE-071004-54   | zgc:173556        |
| ENSDARG00000090768 | 16.57710413 | -9.447299071 | 1.834149504 | -5.150779177 | 2.59406E-07 | 2.87456E-05 | zp3.2             | ZDB-GENE-050626-121  | zp3.2             |
| ENSDARG00000092551 | 5.668152371 | -3.517026138 | 0.683522309 | -5.145444548 | 2.66888E-07 | 2.94173E-05 | si:dkey-56e3.2    | ZDB-GENE-090313-316  | si:dkey-56e3.2    |
| ENSDARG00000038106 | 119.5873487 | -0.621707446 | 0.120870315 | -5.143590851 | 2.69536E-07 | 2.9552E-05  | slc37a4a          | ZDB-GENE-040426-2230 | slc37a4a          |
| ENSDARG00000019208 | 9.701048629 | -2.069978408 | 0.402725121 | -5.139928701 | 2.74843E-07 | 2.99752E-05 | camsap1a          | ZDB-GENE-060518-4    | camsap1a          |
| ENSDARG00000044325 | 3.286386638 | -3.898016302 | 0.75992537  | -5.129472521 | 2.90555E-07 | 3.1523E-05  | zgc:193690        | ZDB-GENE-080721-12   | zgc:193690        |
| ENSDARG00000078638 | 15.44667221 | -25.81667087 | 5.042430299 | -5.11988651  | 3.0572E-07  | 3.29954E-05 | zgc:171750        | ZDB-GENE-071004-30   | zgc:171750        |
| ENSDARG00000098761 | 25.45616945 | -1.694522333 | 0.331403608 | -5.113168034 | 3.168E-07   | 3.40142E-05 | rgs2              | ZDB-GENE-040718-410  | rgs2              |
| ENSDARG00000045015 | 126.3802921 | 2.544689869  | 0.498046661 | 5.109340289  | 3.23286E-07 | 3.45316E-05 | cyp27b1           | ZDB-GENE-111005-2    | cyp27b1           |
| ENSDARG00000099959 | 1303.260766 | -1.849270088 | 0.362823169 | -5.096890838 | 3.45277E-07 | 3.66915E-05 | smyhc1            | ZDB-GENE-030131-271  | smyhc1            |
| ENSDARG00000037532 | 4.291787297 | -4.199373567 | 0.826104097 | -5.083346736 | 3.70842E-07 | 3.92071E-05 | mcm3l             | ZDB-GENE-040121-2    | mcm3l             |
| ENSDARG00000002988 | 66.98560687 | -1.357469663 | 0.267341004 | -5.077671002 | 3.8209E-07  | 4.01912E-05 | tnnt2d            | ZDB-GENE-050626-97   | tnnt2d            |
| ENSDARG00000055250 | 7.502568723 | -6.733813677 | 1.32693947  | -5.074695441 | 3.88117E-07 | 4.0619E-05  | si:ch211-132b12.8 | ZDB-GENE-030131-5453 | si:ch211-132b12.8 |
| ENSDARG00000095486 | 5.762329285 | -30.2596911  | 5.970611435 | -5.068105911 | 4.01794E-07 | 4.18391E-05 | CU467646.2        |                      |                   |
| ENSDARG00000115817 | 13.85680544 | 0.2022701095 | 5.970314145 | -5.062884501 | 4.1296E-07  | 4.24517E-05 | si:dkey-46g23.2   | ZDB-GENE-070705-476  | si:dkey-46g23.2   |
| ENSDARG00000028295 | 23.11905057 | -1.745463881 | 0.344836569 | -5.0617134   | 4.15505E-07 | 4.24517E-05 | mkrn4             | ZDB-GENE-030131-5954 | mkrn4             |
| ENSDARG00000059824 | 39.90990609 | -2.405219262 | 0.475185482 | -5.061642987 | 4.15659E-07 | 4.24517E-05 | soat2             | ZDB-GENE-061013-742  | soat2             |
| ENSDARG00000099776 | 551.4279428 | -1.117872979 | 0.220856068 | -5.061545244 | 4.15872E-07 | 4.24517E-05 | glula             | ZDB-GENE-030131-688  | glula             |
| ENSDARG00000094392 | 32.88691462 | -11.16827273 | 2.20981483  | -5.053940526 | 4.32786E-07 | 4.39618E-05 | si:dkey-229d11.5  | ZDB-GENE-030131-5342 | si:dkey-229d11.5  |
| ENSDARG00000079104 | 53.51861546 | 0.640382678  | 0.126931962 | 5.045086121  | 4.53317E-07 | 4.57011E-05 | mphas1            | ZDB-GENE-080917-20   | mphas1            |
| ENSDARG00000011245 | 72.2479883  | -0.921570662 | 0.182682293 | -5.044663307 | 4.54321E-07 | 4.57011E-05 | esrp1             | ZDB-GENE-070112-1732 | esrp1             |
| ENSDARG00000023479 | 9.768034571 | -5.663985082 | 1.123762448 | -5.040197856 | 4.65051E-07 | 4.65545E-05 | lrp13             | ZDB-GENE-130729-1    | lrp13             |
| ENSDARG00000096739 | 414.1552786 | 0.856977232  | 0.170082389 | 5.038600642  | 4.68948E-07 | 4.67189E-05 | si:dkey-219e21.2  | ZDB-GENE-141215-26   | si:dkey-219e21.2  |
| ENSDARG00000069615 | 423.9524308 | -1.203129128 | 0.238958101 | -5.034895745 | 4.78109E-07 | 4.74037E-05 | ckmt2a            | ZDB-GENE-030131-5717 | ckmt2a            |
| ENSDARG00000024478 | 188.1462267 | -0.575773551 | 0.114453755 | -5.030621785 | 4.88892E-07 | 4.79692E-05 | mpc2              | ZDB-GENE-030131-330  | mpc2              |
| ENSDARG00000115205 | 11.98062755 | -9.291211627 | 1.847097789 | -5.030167696 | 4.90051E-07 | 4.79692E-05 | zgc:171445        | ZDB-GENE-080205-2    | zgc:171445        |
| ENSDARG00000059507 | 23.6779285  | 0.988930051  | 0.196610603 | 5.029891765  | 4.90757E-07 | 4.79692E-05 | si:dkey-163m14.2  | ZDB-GENE-120215-47   | si:dkey-163m14.2  |
| ENSDARG00000093024 | 190.8380221 | 0.786439704  | 0.156474252 | 5.026000715  | 5.00814E-07 | 4.87224E-05 | si:ch211-213a13.2 | ZDB-GENE-050208-551  | si:ch211-213a13.2 |
| ENSDARG00000017049 | 156.2836699 | -0.641481363 | 0.127820075 | -5.018627665 | 5.20419E-07 | 5.02518E-05 | adsl              | ZDB-GENE-030131-6363 | adsl              |
| ENSDARG00000034207 | 12.7536379  | -1.837657256 | 0.36619329  | -5.01827124  | 5.21385E-07 | 5.02518E-05 | cx44.2            | ZDB-GENE-010619-1    | cx44.2            |
| ENSDARG00000025428 | 76.81668131 | -1.740975752 | 0.348361919 | -4.997606383 | 5.80463E-07 | 5.56868E-05 | socs3a            | ZDB-GENE-030131-7349 | socs3a            |
| ENSDARG00000102362 | 174.7170902 | -0.568205734 | 0.114055413 | -4.981839279 | 6.29827E-07 | 6.01442E-05 | slc25a12          | ZDB-GENE-031006-11   | slc25a12          |
| ENSDARG00000013946 | 92.34589176 | -0.798394275 | 0.160833116 | -4.964116193 | 6.90146E-07 | 6.56019E-05 | ivns1abpb         | ZDB-GENE-030131-6266 | ivns1abpb         |
| ENSDARG00000115610 | 369.8647104 | 1.003737247  | 0.202413239 | 4.958851751  | 7.09111E-07 | 6.70967E-05 | ccl25a            | ZDB-GENE-110222-1    | ccl25a            |
| ENSDARG00000090870 | 40.26331531 | -10.15387801 | 2.049651135 | -4.953954281 | 7.27203E-07 | 6.84959E-05 | si:ch1073-263o8.2 | ZDB-GENE-030131-5362 | si:ch1073-263o8.2 |
| ENSDARG00000005840 | 343.5433007 | -0.563235796 | 0.113918051 | -4.944219018 | 7.64497E-07 | 7.16829E-05 | got2b             | ZDB-GENE-030131-7917 | got2b             |
| ENSDARG00000032808 | 2.815566552 | -5.103118592 | 1.037166035 | -4.920252323 | 8.64327E-07 | 8.06783E-05 | tdrd7a            | ZDB-GENE-040426-2103 | tdrd7a            |
| ENSDARG00000101778 | 187.6060301 | -0.769217507 | 0.156377881 | -4.918966169 | 8.70025E-07 | 8.0846E-05  | ca5a              | ZDB-GENE-080220-57   | ca5a              |
| ENSDARG00000012485 | 16.12274783 | -1.967754518 | 0.400846948 | -4.908992145 | 9.15456E-07 | 8.46879E-05 | aurka             | ZDB-GENE-040801-161  | aurka             |
| ENSDARG00000058693 | 1360.92534  | -0.455502016 | 0.092829388 | -4.906872992 | 9.25399E-07 | 8.52272E-05 | cast              | ZDB-GENE-050810-2    | cast              |
| ENSDARG00000042129 | 10.64015137 | -7.607211065 | 1.551143005 | -4.904261593 | 9.37794E-07 | 8.59866E-05 | zp3a.1            | ZDB-GENE-040727-1    | zp3a.1            |
| ENSDARG00000042866 | 48.88663001 | -0.929109284 | 0.189524137 | -4.902326942 | 9.4708E-07  | 8.61939E-05 | cx35.4            | ZDB-GENE-050417-174  | cx35.4            |

|                     |             |              |             |              |             |             |                |                      |                |
|---------------------|-------------|--------------|-------------|--------------|-------------|-------------|----------------|----------------------|----------------|
| ENSDARG00000099801  | 2.66403747  | -5.019249254 | 1.023906348 | -4.902058927 | 9.48374E-07 | 8.61939E-05 | topaz1         | ZDB-GENE-130117-1    | topaz1         |
| ENSDARG00000102892  | 14.64996812 | -9.237661077 | 1.885979513 | -4.898070746 | 9.67822E-07 | 8.75773E-05 | h1m            | ZDB-GENE-030131-5614 | h1m            |
| ENSDARG00000012366  | 48.00462376 | -0.985925278 | 0.201763286 | -4.886544507 | 1.02621E-06 | 9.24572E-05 | fbp2           | ZDB-GENE-040822-23   | fbp2           |
| ENSDARG00000004823  | 2.032907526 | -5.244981785 | 1.074933727 | -4.879353631 | 1.06434E-06 | 9.54774E-05 | asz1           | ZDB-GENE-040426-988  | asz1           |
| ENSDARG00000063572  | 867.7332935 | -0.562098571 | 0.115271779 | -4.876289563 | 1.081E-06   | 9.65537E-05 | perp           | ZDB-GENE-050104-1    | perp           |
| ENSDARG00000051923  | 43.84884501 | -1.826862133 | 0.375125593 | -4.870001324 | 1.11598E-06 | 9.92499E-05 | ccnb1          | ZDB-GENE-000406-10   | ccnb1          |
| ENSDARG00000039020  | 10.120603   | -2.227708392 | 0.457916533 | -4.864878704 | 1.14527E-06 | 0.00010142  | fbxo5          | ZDB-GENE-030131-4027 | fbxo5          |
| ENSDARG00000012539  | 164.8066131 | 1.058753927  | 0.21799499  | 4.856781014  | 1.19309E-06 | 0.000105206 | dnase1         | ZDB-GENE-040718-423  | dnase1         |
| ENSDARG00000006112  | 108.4870623 | -0.641947485 | 0.132222202 | -4.855065766 | 1.20347E-06 | 0.000105671 | myof           | ZDB-GENE-040426-1138 | myof           |
| ENSDARG00000044774  | 5.807763861 | -3.408448977 | 0.702226089 | -4.85363896  | 1.21216E-06 | 0.000105772 | pou5f3         | ZDB-GENE-980526-485  | pou5f3         |
| ENSDARG000000101585 | 228.8282023 | -1.062684923 | 0.218965702 | -4.853202628 | 1.21483E-06 | 0.000105772 | teca           | ZDB-GENE-090930-1    | teca           |
| ENSDARG00000010572  | 306.5762937 | -1.499441056 | 0.309116139 | -4.850736886 | 1.23004E-06 | 0.000106648 | slc25a25a      | ZDB-GENE-040426-2396 | slc25a25a      |
| ENSDARG00000042620  | 1601.330862 | 0.590697978  | 0.121808171 | 4.849411753  | 1.23828E-06 | 0.000106915 | gstr           | ZDB-GENE-090507-1    | gstr           |
| ENSDARG00000015709  | 69.10498739 | -0.954395138 | 0.197054689 | -4.843300816 | 1.277E-06   | 0.000109801 | hsd17b12a      | ZDB-GENE-030131-5628 | hsd17b12a      |
| ENSDARG00000008732  | 148.2634773 | -0.700809157 | 0.144889278 | -4.836860039 | 1.31906E-06 | 0.000112949 | zgc:66479      | ZDB-GENE-031030-10   | zgc:66479      |
| ENSDARG00000034181  | 79.02328018 | -1.087741434 | 0.225685187 | -4.819728981 | 1.43753E-06 | 0.000122587 | esr2b          | ZDB-GENE-030116-1    | esr2b          |
| ENSDARG00000004692  | 97.67011629 | -0.67859413  | 0.140913155 | -4.81569041  | 1.46692E-06 | 0.00012458  | nabp1a         | ZDB-GENE-041212-71   | nabp1a         |
| ENSDARG00000090337  | 146.9676828 | -1.243475303 | 0.258583297 | -4.808799782 | 1.51839E-06 | 0.000128425 | pprc1          | ZDB-GENE-030131-9858 | pprc1          |
| ENSDARG00000051854  | 15.15447836 | -2.066447105 | 0.430539719 | -4.79966659  | 1.5893E-06  | 0.000133876 | cdt1           | ZDB-GENE-070111-1    | cdt1           |
| ENSDARG00000037894  | 72.14167567 | 0.874090201  | 0.182282766 | 4.795243225  | 1.62478E-06 | 0.00013631  | ezh1           | ZDB-GENE-050114-1    | ezh1           |
| ENSDARG00000099954  | 95.05040735 | -0.631776044 | 0.131782735 | -4.794072943 | 1.63429E-06 | 0.000136555 | plekhm1        | ZDB-GENE-030131-2752 | plekhm1        |
| ENSDARG00000086272  | 10.44936076 | -1.638255826 | 0.342276428 | -4.786353052 | 1.69839E-06 | 0.000141342 | si:dkey-4p15.5 | ZDB-GENE-121214-193  | si:dkey-4p15.5 |
| ENSDARG00000041723  | 29.63809375 | -1.584883134 | 0.331628013 | -4.779099082 | 1.76082E-06 | 0.000145951 | zgc:55461      | ZDB-GENE-040426-2879 | zgc:55461      |
| ENSDARG00000061778  | 12.28927138 | -1.970873901 | 0.412628659 | -4.776386362 | 1.78473E-06 | 0.000147344 | fmn2b          | ZDB-GENE-080225-35   | fmn2b          |
| ENSDARG00000069250  | 83.32757352 | 1.002755079  | 0.210003549 | 4.774943496  | 1.79758E-06 | 0.000147815 | uaca           | ZDB-GENE-050419-37   | uaca           |
| ENSDARG00000044562  | 924.7596173 | -0.811416687 | 0.170111523 | -4.76991019  | 1.84308E-06 | 0.000150958 | cycsb          | ZDB-GENE-040625-38   | cycsb          |
| ENSDARG00000071495  | 55.68858541 | 1.373922276  | 0.288140444 | 4.768238221  | 1.85844E-06 | 0.000151275 | sult3st5       | ZDB-GENE-060503-722  | sult3st5       |
| ENSDARG00000070961  | 107.3871962 | -0.694457286 | 0.145652627 | -4.76790085  | 1.86155E-06 | 0.000151275 | lepr           | ZDB-GENE-080104-1    | lepr           |
| ENSDARG00000052942  | 117.7639553 | 0.808828536  | 0.170196062 | 4.752334015  | 2.01082E-06 | 0.000162766 | aspg           | ZDB-GENE-070820-14   | aspg           |
| ENSDARG00000099395  | 24.30134421 | -0.965809204 | 0.203362802 | -4.749193037 | 2.0423E-06  | 0.000164671 | cables1        | ZDB-GENE-070912-509  | cables1        |
| ENSDARG00000058471  | 46.34395225 | -1.390973785 | 0.293054584 | -4.746466571 | 2.07001E-06 | 0.000166259 | plk1           | ZDB-GENE-021115-7    | plk1           |
| ENSDARG00000042737  | 68.3116666  | -1.164354404 | 0.245600283 | -4.740851226 | 2.12822E-06 | 0.000170133 | slc52a3        | ZDB-GENE-060421-4490 | slc52a3        |
| ENSDARG00000044980  | 68.39432323 | -0.593951233 | 0.125299859 | -4.740238629 | 2.13467E-06 | 0.000170133 | kpna6          | ZDB-GENE-130530-626  | kpna6          |
| ENSDARG00000020956  | 1841.84982  | -0.594144162 | 0.125470293 | -4.735337325 | 2.18691E-06 | 0.000173629 | pck2           | ZDB-GENE-040426-2266 | pck2           |
| ENSDARG00000016088  | 31.86267962 | -1.1803203   | 0.249451941 | -4.731654096 | 2.22698E-06 | 0.000176135 | rtn2a          | ZDB-GENE-060420-1    | rtn2a          |
| ENSDARG00000100265  | 3.786231527 | -4.013855607 | 0.849590781 | -4.72445758  | 2.3073E-06  | 0.000181794 | rhcg           | ZDB-GENE-040426-2595 | rhcg           |
| ENSDARG00000089245  | 33.38801193 | -0.888596868 | 0.189228939 | -4.720830236 | 2.34884E-06 | 0.000184366 | dusp23b        | ZDB-GENE-040718-163  | dusp23b        |
| ENSDARG00000025174  | 2.63365499  | -6.605285194 | 1.402257715 | -4.710464507 | 2.47153E-06 | 0.000192627 | zgc:103482     | ZDB-GENE-041010-115  | zgc:103482     |
| ENSDARG00000004745  | 93.97652074 | -0.718985325 | 0.152638828 | -4.710369782 | 2.47268E-06 | 0.000192627 | lmbr1l         | ZDB-GENE-030131-9906 | lmbr1l         |
| ENSDARG00000062370  | 114.8330058 | -0.622149403 | 0.132254687 | -4.704176586 | 2.54893E-06 | 0.000197574 | bcl2l13        | ZDB-GENE-050419-215  | bcl2l13        |
| ENSDARG00000105548  | 9.976444691 | 2.00410058   | 0.426071599 | 4.703670894  | 2.55525E-06 | 0.000197574 | si:dkey-1h4.4  | ZDB-GENE-160728-41   | si:dkey-1h4.4  |
| ENSDARG00000022424  | 113.216588  | -1.142306535 | 0.242954574 | -4.701728865 | 2.57968E-06 | 0.000198722 | slc26a5        | ZDB-GENE-030131-1566 | slc26a5        |
| ENSDARG00000026862  | 132.6967967 | -0.474044485 | 0.100955537 | -4.695576863 | 2.65855E-06 | 0.000204039 | aktip          | ZDB-GENE-030909-5    | aktip          |
| ENSDARG00000012789  | 30.43651427 | -0.99596669  | 0.212220567 | -4.693073366 | 2.69131E-06 | 0.000205791 | plek2          | ZDB-GENE-080219-2    | plek2          |
| ENSDARG00000055093  | 26.53489775 | -1.4276807   | 0.30453648  | -4.688044921 | 2.75827E-06 | 0.000209633 | cdh27          | ZDB-GENE-141215-13   | cdh27          |
| ENSDARG00000070178  | 1.427928611 | -5.388510741 | 1.149541543 | -4.687530235 | 2.76522E-06 | 0.000209633 | zp3d.2         | ZDB-GENE-030131-5363 | zp3d.2         |

|                    |             |              |             |              |             |             |                   |                      |                   |
|--------------------|-------------|--------------|-------------|--------------|-------------|-------------|-------------------|----------------------|-------------------|
| ENSDARG00000087363 | 3.157158658 | -6.399853376 | 1.365437251 | -4.687035871 | 2.7719E-06  | 0.000209633 | si:dkeyp-46h3.6   | ZDB-GENE-060503-90   | si:dkeyp-46h3.6   |
| ENSDARG00000045815 | 12.97649522 | -1.80091717  | 0.384628825 | -4.682221022 | 2.83783E-06 | 0.000213838 | mcm10             | ZDB-GENE-041210-42   | mcm10             |
| ENSDARG00000060438 | 62.42721249 | -0.950438585 | 0.203092126 | -4.679839655 | 2.87099E-06 | 0.000215553 | tbl1x             | ZDB-GENE-070209-131  | tbl1x             |
| ENSDARG00000011094 | 34.9555632  | -1.473197322 | 0.315090411 | -4.675474946 | 2.93274E-06 | 0.000219394 | ccna2             | ZDB-GENE-020418-1    | ccna2             |
| ENSDARG00000073764 | 245.1083118 | -0.773185234 | 0.165617541 | -4.668498464 | 3.03409E-06 | 0.00022616  | si:ch211-113j14.1 | ZDB-GENE-120215-110  | si:ch211-113j14.1 |
| ENSDARG00000106630 | 11.83782273 | -1.636405036 | 0.351219173 | -4.659213283 | 3.1742E-06  | 0.000235756 | LO018627.1        |                      |                   |
| ENSDARG00000039093 | 1349.623767 | -0.522382504 | 0.112233093 | -4.65444275  | 3.24858E-06 | 0.000240418 | got1              | ZDB-GENE-040426-2003 | got1              |
| ENSDARG00000056639 | 65.99384331 | 1.15213592   | 0.247609681 | 4.653032607  | 3.27089E-06 | 0.000241207 | carmil2           | ZDB-GENE-050419-197  | carmil2           |
| ENSDARG00000042824 | 753.8200954 | 0.494970112  | 0.106462916 | 4.649225595  | 3.33184E-06 | 0.000244831 | nfe2l2a           | ZDB-GENE-030723-2    | nfe2l2a           |
| ENSDARG00000076594 | 43.1651211  | 0.701174289  | 0.150882874 | 4.647142992  | 3.36564E-06 | 0.000246441 | pcdh12            | ZDB-GENE-140106-126  | pcdh12            |
| ENSDARG00000091669 | 28.49608733 | -1.458122359 | 0.313846683 | -4.645970271 | 3.38482E-06 | 0.000246972 | bicdl2l           | ZDB-GENE-091204-161  | bicdl2l           |
| ENSDARG00000077874 | 16.39344225 | 1.62216633   | 0.349338077 | 4.64354285   | 3.42485E-06 | 0.000249017 | vwa10.1           | ZDB-GENE-090313-291  | vwa10.1           |
| ENSDARG00000005359 | 463.7898582 | -0.428842594 | 0.092468766 | -4.637702161 | 3.52304E-06 | 0.00025526  | sucla2            | ZDB-GENE-040426-1963 | sucla2            |
| ENSDARG00000026224 | 12.07440518 | -1.451692361 | 0.314235066 | -4.619765641 | 3.84174E-06 | 0.000277381 | fanci             | ZDB-GENE-030131-2905 | fanci             |
| ENSDARG00000102911 | 20.5409113  | -0.821984166 | 0.178604625 | -4.60225577  | 4.1794E-06  | 0.000300713 | iffo2b            | ZDB-GENE-121030-9    | iffo2b            |
| ENSDARG00000042055 | 44.11375974 | -1.491832476 | 0.32424881  | -4.600888057 | 4.20693E-06 | 0.000301647 | fam129aa          | ZDB-GENE-041014-181  | fam129aa          |
| ENSDARG00000060246 | 212.0253284 | -1.217283851 | 0.264639741 | -4.599777211 | 4.22943E-06 | 0.000302215 | slc16a6b          | ZDB-GENE-110208-3    | slc16a6b          |
| ENSDARG00000008363 | 185.2923196 | -0.625428375 | 0.136102905 | -4.595261034 | 4.32208E-06 | 0.000307774 | mcl1b             | ZDB-GENE-030825-1    | mcl1b             |
| ENSDARG00000079957 | 1.828023984 | -4.944071032 | 1.076892067 | -4.591055301 | 4.4101E-06  | 0.000312966 | eloal             | ZDB-GENE-131029-2    | eloal             |
| ENSDARG00000090468 | 48.83622291 | -1.146184717 | 0.249816576 | -4.588105139 | 4.47287E-06 | 0.000316338 | ppp1r3aa          | ZDB-GENE-110914-122  | ppp1r3aa          |
| ENSDARG00000016538 | 2.197746638 | -4.809166262 | 1.049595233 | -4.581924642 | 4.60716E-06 | 0.000324726 | zgc:55888         | ZDB-GENE-040426-834  | zgc:55888         |
| ENSDARG00000076895 | 75.79404621 | 0.594746522  | 0.129865903 | 4.579697288  | 4.65649E-06 | 0.000327091 | flrt3             | ZDB-GENE-030131-1988 | flrt3             |
| ENSDARG00000071618 | 20.21118619 | 1.120388242  | 0.245441511 | 4.564787101  | 5.00001E-06 | 0.000350035 | si:ch211-213a13.5 | ZDB-GENE-050208-711  | si:ch211-213a13.5 |
| ENSDARG00000015065 | 417.3413461 | 1.420220406  | 0.311210095 | 4.56354222   | 5.02977E-06 | 0.000350354 | c4                | ZDB-GENE-030131-5697 | c4                |
| ENSDARG00000004713 | 15.27287285 | -1.501992086 | 0.329188608 | -4.562709802 | 5.04976E-06 | 0.000350354 | mad2l1            | ZDB-GENE-030515-3    | mad2l1            |
| ENSDARG00000111240 | 19.64636802 | -1.938953878 | 0.425042694 | -4.561786152 | 5.07203E-06 | 0.000350354 | dhrs13a.2         | ZDB-GENE-040912-69   | dhrs13a.2         |
| ENSDARG00000098742 | 8.39629881  | -1.432990786 | 0.314129836 | -4.561778676 | 5.07221E-06 | 0.000350354 | lrtm1             | ZDB-GENE-161221-2    | lrtm1             |
| ENSDARG00000019236 | 137.1185374 | 0.711203037  | 0.155974516 | 4.559738713  | 5.12173E-06 | 0.0003526   | gsr               | ZDB-GENE-050522-116  | gsr               |
| ENSDARG00000010873 | 290.6954348 | 0.600704335  | 0.131899179 | 4.554268964  | 5.25681E-06 | 0.0003607   | DDX17             | ZDB-GENE-030131-18   | si:dkeyp-156n14.5 |
| ENSDARG00000055973 | 4.059680521 | -27.12579002 | 5.970813528 | -4.54306434  | 5.54423E-06 | 0.000379167 | zar1l             | ZDB-GENE-060810-119  | zar1l             |
| ENSDARG00000092999 | 6.772974892 | -2.207685076 | 0.486334049 | -4.53944173  | 5.64034E-06 | 0.000384471 | tnni4b.1          | ZDB-GENE-090312-198  | tnni4b.1          |
| ENSDARG00000044356 | 113.8995464 | -0.774332005 | 0.17063332  | -4.537988274 | 5.67934E-06 | 0.00038586  | tp63              | ZDB-GENE-030819-1    | tp63              |
| ENSDARG00000002336 | 147.9573465 | 0.61676344   | 0.13600211  | 4.534954951  | 5.76158E-06 | 0.000390168 | dlc               | ZDB-GENE-000125-4    | dlc               |
| ENSDARG00000102335 | 45.75827611 | -0.986372465 | 0.217627792 | -4.532382813 | 5.8322E-06  | 0.000393664 | ano1              | ZDB-GENE-121127-3    | ano1              |
| ENSDARG00000060298 | 24.40670102 | -1.185693994 | 0.261969821 | -4.526070931 | 6.00904E-06 | 0.000404284 | nin               | ZDB-GENE-070725-1    | nin               |
| ENSDARG00000091211 | 2687.150625 | 0.717858739  | 0.158694403 | 4.523529037  | 6.0817E-06  | 0.000407848 | adh8a             | ZDB-GENE-030529-3    | adh8a             |
| ENSDARG00000071727 | 11.8033103  | -8.528522792 | 1.28607447  | -4.521837778 | 6.1305E-06  | 0.000409795 | si:dkeyp-37o8.1   | ZDB-GENE-030131-5667 | si:dkeyp-37o8.1   |
| ENSDARG00000042014 | 1.568967379 | -4.210704861 | 0.93170125  | -4.519372344 | 6.20232E-06 | 0.000413262 | cyp11c1           | ZDB-GENE-070828-1    | cyp11c1           |
| ENSDARG00000029822 | 6468.840016 | 1.120041518  | 0.248106944 | 4.514349741  | 6.35113E-06 | 0.000421821 | cel.2             | ZDB-GENE-061110-10   | cel.2             |
| ENSDARG00000076104 | 103.6994431 | 0.760386222  | 0.168716351 | 4.506891096  | 6.57844E-06 | 0.000435522 | sema4bb           | ZDB-GENE-120503-1    | sema4bb           |
| ENSDARG00000045424 | 21.77831196 | -10.58525572 | 2.350123005 | -4.504128379 | 6.66459E-06 | 0.000439821 | zgc:173856        | ZDB-GENE-030131-5358 | zgc:173856        |
| ENSDARG00000005565 | 125.3793092 | -0.925781687 | 0.205699893 | -4.500642535 | 6.77484E-06 | 0.000445677 | entpd8            | ZDB-GENE-040724-142  | entpd8            |
| ENSDARG00000074686 | 121.7381421 | 0.662107643  | 0.147156392 | 4.4993468    | 6.81626E-06 | 0.000446983 | oga               | ZDB-GENE-030131-3208 | oga               |
| ENSDARG00000104949 | 117.3422778 | -0.994493694 | 0.221113377 | -4.497664077 | 6.87041E-06 | 0.000449113 | slc27a1b          | ZDB-GENE-061013-672  | slc27a1b          |
| ENSDARG00000102440 | 29.24182154 | 0.809473066  | 0.180039458 | 4.496086998  | 6.92154E-06 | 0.000451032 | CABZ01070852.1    |                      |                   |
| ENSDARG00000069790 | 13.36774316 | -1.663339539 | 0.370764551 | -4.486242096 | 7.24904E-06 | 0.000470434 | dynll2a           | ZDB-GENE-030828-11   | dynll2a           |

|                    |             |              |             |              |             |             |                   |                      |                   |
|--------------------|-------------|--------------|-------------|--------------|-------------|-------------|-------------------|----------------------|-------------------|
| ENSDARG00000075217 | 1.421987694 | -5.726173825 | 1.27651626  | -4.485782127 | 7.26469E-06 | 0.000470434 | tdrd12            | ZDB-GENE-121214-348  | tdrd12            |
| ENSDARG00000060374 | 14.87791747 | -1.197250118 | 0.266956629 | -4.484811345 | 7.29785E-06 | 0.000470592 | ttl11             | ZDB-GENE-061013-747  | ttl11             |
| ENSDARG00000035741 | 423.1230525 | -0.42795517  | 0.095432355 | -4.484382343 | 7.31254E-06 | 0.000470592 | slc25a11          | ZDB-GENE-040625-79   | slc25a11          |
| ENSDARG00000039217 | 25.64829766 | -1.121586413 | 0.250179853 | -4.483120442 | 7.35594E-06 | 0.000471919 | orc1              | ZDB-GENE-030131-6960 | orc1              |
| ENSDARG00000005454 | 60.60589329 | -1.081576214 | 0.241345159 | -4.481449796 | 7.41377E-06 | 0.000474161 | tacc3             | ZDB-GENE-050522-327  | tacc3             |
| ENSDARG00000080020 | 67.08426628 | 0.821939557  | 0.183459072 | 4.480233921  | 7.45613E-06 | 0.000475403 | il13ra1           | ZDB-GENE-060503-103  | il13ra1           |
| ENSDARG00000070174 | 239.6939968 | 0.50058645   | 0.111756814 | 4.479247676  | 7.49066E-06 | 0.000476139 | PLEKHH3           | ZDB-GENE-030131-5404 | si:ch211-18i17.2  |
| ENSDARG00000087093 | 60.60172512 | -1.396628597 | 0.31213077  | -4.474498287 | 7.65909E-06 | 0.000485357 | si:ch211-157c3.4  | ZDB-GENE-030131-8454 | si:ch211-157c3.4  |
| ENSDARG00000070914 | 314.0507767 | -0.616049421 | 0.13794246  | -4.465988351 | 7.96999E-06 | 0.000502417 | dusp6             | ZDB-GENE-030613-1    | dusp6             |
| ENSDARG00000006963 | 136.6565348 | -0.789704783 | 0.176833669 | -4.465805556 | 7.9768E-06  | 0.000502417 | cse1l             | ZDB-GENE-990603-1    | cse1l             |
| ENSDARG00000041895 | 256.2782907 | -0.622172707 | 0.139382738 | -4.463771584 | 8.05294E-06 | 0.000505676 | cad               | ZDB-GENE-021030-4    | cad               |
| ENSDARG00000040732 | 3.7050744   | -7.164050689 | 1.606891692 | -4.458328291 | 8.26013E-06 | 0.000517119 | elavl2            | ZDB-GENE-040704-9    | elavl2            |
| ENSDARG00000068214 | 947.0039324 | 0.378216123  | 0.084919682 | 4.453809954  | 8.43598E-06 | 0.000525989 | ccni              | ZDB-GENE-040426-2898 | ccni              |
| ENSDARG00000055226 | 141.1960412 | -0.885133017 | 0.198754976 | -4.453387954 | 8.45258E-06 | 0.000525989 | slc7a7            | ZDB-GENE-051127-5    | slc7a7            |
| ENSDARG00000097613 | 37.21749671 | -1.791937126 | 0.402594156 | -4.450976495 | 8.54807E-06 | 0.000530339 | igfn1.3           | ZDB-GENE-131122-44   | igfn1.3           |
| ENSDARG00000053279 | 134.5379506 | 0.669210275  | 0.150497483 | 4.446654276  | 8.7218E-06  | 0.000539502 | apln              | ZDB-GENE-070521-8    | apln              |
| ENSDARG00000036830 | 5601.453125 | -0.713210761 | 0.160508078 | -4.443457114 | 8.85248E-06 | 0.000545956 | krt91             | ZDB-GENE-040801-181  | krt91             |
| ENSDARG00000100504 | 113.1515944 | 1.203382142  | 0.270866631 | 4.442710928  | 8.88325E-06 | 0.00054619  | ppp1r27b          | ZDB-GENE-051023-5    | ppp1r27b          |
| ENSDARG00000028027 | 190.5605171 | 0.91372258   | 0.205696625 | 4.442088336  | 8.909E-06   | 0.00054619  | trim63a           | ZDB-GENE-040625-139  | trim63a           |
| ENSDARG00000102490 | 45.84455569 | 1.202916104  | 0.271271289 | 4.434365711  | 9.23438E-06 | 0.000564468 | asb2b             | ZDB-GENE-040426-20   | asb2b             |
| ENSDARG00000056462 | 7.944938204 | -4.008620773 | 0.905577336 | -4.426591317 | 9.57339E-06 | 0.00058347  | crp2              | ZDB-GENE-030131-5826 | crp2              |
| ENSDARG00000054454 | 68.64897153 | 0.721441416  | 0.163174848 | 4.421278319  | 9.81187E-06 | 0.000596251 | epha4a            | ZDB-GENE-001207-7    | epha4a            |
| ENSDARG00000037551 | 122.8325767 | 1.211965803  | 0.274425301 | 4.416377785  | 1.00369E-05 | 0.00060814  | pm20d1.1          | ZDB-GENE-051120-102  | pm20d1.1          |
| ENSDARG00000054374 | 3.75746687  | -7.438691118 | 1.685231545 | -4.414046926 | 1.01456E-05 | 0.000612936 | alg13             | ZDB-GENE-060307-1    | alg13             |
| ENSDARG00000057125 | 168.9607557 | 0.707417861  | 0.16031115  | 4.412780161  | 1.02052E-05 | 0.000614742 | pld1b             | ZDB-GENE-070510-3    | pld1b             |
| ENSDARG00000004405 | 5.894809932 | -2.528639796 | 0.574400938 | -4.402220871 | 1.07148E-05 | 0.000643574 | snx10a            | ZDB-GENE-050809-44   | snx10a            |
| ENSDARG00000090851 | 18.44130604 | 0.990391277  | 0.225086166 | 4.400053959  | 1.08224E-05 | 0.000648155 | ciita             | ZDB-GENE-071116-6    | ciita             |
| ENSDARG00000043963 | 27.98078069 | -1.56422015  | 0.355642776 | -4.398290239 | 1.09107E-05 | 0.000651561 | si:ch211-241j12.3 | ZDB-GENE-040724-72   | si:ch211-241j12.3 |
| ENSDARG00000002347 | 3.01121969  | -6.848214032 | 1.558996321 | -4.392706986 | 1.11948E-05 | 0.000666072 | cyp11a1           | ZDB-GENE-010306-1    | cyp11a1           |
| ENSDARG00000086740 | 692.5823999 | 0.570549418  | 0.129898912 | 4.392257106  | 1.1218E-05  | 0.000666072 | phyh              | ZDB-GENE-050417-361  | phyh              |
| ENSDARG00000030915 | 5112.294186 | 0.898631263  | 0.204750771 | 4.388902941  | 1.13924E-05 | 0.000674495 | cpa1              | ZDB-GENE-050522-438  | cpa1              |
| ENSDARG00000010332 | 5.223919382 | -7.723633192 | 1.76027469  | -4.387743139 | 1.14533E-05 | 0.000674629 | zgc:56231         | ZDB-GENE-040426-1914 | zgc:56231         |
| ENSDARG00000030006 | 31.81025172 | -0.818148609 | 0.186467509 | -4.387620195 | 1.14598E-05 | 0.000674629 | slc6a7            | ZDB-GENE-070112-1492 | slc6a7            |
| ENSDARG00000028725 | 34.31022666 | -0.886564025 | 0.202157911 | -4.385502497 | 1.15718E-05 | 0.000679296 | adra1aa           | ZDB-GENE-030131-2831 | adra1aa           |
| ENSDARG00000099860 | 1211.850691 | -0.75501143  | 0.17231543  | -4.38156601  | 1.17829E-05 | 0.000689734 | pkmb              | ZDB-GENE-040801-230  | pkmb              |
| ENSDARG00000040926 | 92.94232742 | 0.658609556  | 0.150352345 | 4.380440862  | 1.18439E-05 | 0.000691353 | nr2f2             | ZDB-GENE-990415-252  | nr2f2             |
| ENSDARG00000016085 | 398.3171768 | 0.360845776  | 0.082416502 | 4.378319467  | 1.19598E-05 | 0.000696154 | mbnl3             | ZDB-GENE-081002-3    | mbnl3             |
| ENSDARG00000102055 | 507.9168227 | -0.449153103 | 0.10262634  | -4.376586982 | 1.20552E-05 | 0.000699742 | hadhb             | ZDB-GENE-030131-8550 | hadhb             |
| ENSDARG00000096229 | 3.302355466 | -3.324126192 | 0.760222063 | -4.372572637 | 1.22791E-05 | 0.000710747 | si:dkey-260c8.8   | ZDB-GENE-030131-5375 | si:dkey-260c8.8   |
| ENSDARG00000090371 | 26.44895638 | 0.98512301   | 0.22541567  | 4.370250784  | 1.24104E-05 | 0.000716346 | si:dkey-46i9.6    | ZDB-GENE-160114-63   | si:dkey-46i9.6    |
| ENSDARG00000023002 | 7.775266181 | -1.82548201  | 0.41792204  | -4.367996508 | 1.25391E-05 | 0.000721767 | dtl               | ZDB-GENE-020419-34   | dtl               |
| ENSDARG00000040433 | 25.61362374 | -3.284968908 | 0.752517029 | -4.365308402 | 1.26944E-05 | 0.000728677 | cyp2k22           | ZDB-GENE-040426-822  | cyp2k22           |
| ENSDARG00000012718 | 2.594447728 | -3.703689335 | 0.848860719 | -4.363129609 | 1.28215E-05 | 0.000732738 | wee2              | ZDB-GENE-030131-5682 | wee2              |
| ENSDARG00000017665 | 121.8976364 | -0.873223466 | 0.20014816  | -4.362885309 | 1.28358E-05 | 0.000732738 | snrkb             | ZDB-GENE-040426-1724 | snrkb             |
| ENSDARG00000004060 | 687.1204511 | 0.535799159  | 0.122908044 | 4.359349834  | 1.30449E-05 | 0.00074263  | bhlhe40           | ZDB-GENE-030131-3133 | bhlhe40           |
| ENSDARG00000012609 | 2780.628526 | -1.53567612  | 0.352740335 | -4.353559741 | 1.33945E-05 | 0.000760438 | hpx a             |                      |                   |



|                    |             |              |             |              |             |             |                  |                      |                  |
|--------------------|-------------|--------------|-------------|--------------|-------------|-------------|------------------|----------------------|------------------|
| ENSDARG0000069031  | 8.368760124 | 1.567960729  | 0.36021162  | 4.352887693  | 1.34356E-05 | 0.00076069  | plac8l1          | ZDB-GENE-091204-165  | plac8l1          |
| ENSDARG00000103211 | 32.76911106 | -0.976547975 | 0.224460475 | -4.35064558  | 1.35737E-05 | 0.000764442 | si:dkey-19b23.8  | ZDB-GENE-030131-4634 | si:dkey-19b23.8  |
| ENSDARG00000021866 | 92.79452445 | -0.845420214 | 0.19432202  | -4.350614576 | 1.35756E-05 | 0.000764442 | upk1a            | ZDB-GENE-060421-2603 | upk1a            |
| ENSDARG00000040523 | 23.07417339 | -1.083028752 | 0.249256473 | -4.345037616 | 1.39252E-05 | 0.000780894 | smpd2a           | ZDB-GENE-051014-1    | smpd2a           |
| ENSDARG00000075421 | 4.820631655 | -1.99760222  | 0.459773376 | -4.344754013 | 1.39432E-05 | 0.000780894 | pttg1            | ZDB-GENE-081104-345  | pttg1            |
| ENSDARG00000042063 | 3.018582718 | -5.437917862 | 1.252870708 | -4.340366351 | 1.42245E-05 | 0.000794504 | si:ch211-145c1.1 | ZDB-GENE-070912-81   | si:ch211-145c1.1 |
| ENSDARG00000003904 | 3.728765986 | -3.058240851 | 0.705208637 | -4.336646904 | 1.44673E-05 | 0.000805889 | sycp1            | ZDB-GENE-040910-6    | sycp1            |
| ENSDARG00000102636 | 2.630149099 | -3.066535705 | 0.707502015 | -4.334313739 | 1.46216E-05 | 0.0008123   | trmt9b           | ZDB-GENE-030131-4851 | trmt9b           |
| ENSDARG00000094055 | 8.339087859 | -2.437603523 | 0.562488833 | -4.333603404 | 1.46688E-05 | 0.000812747 | si:dkey-88l16.3  | ZDB-GENE-030131-6015 | si:dkey-88l16.3  |
| ENSDARG00000018643 | 105.0784353 | 1.161882147  | 0.268171487 | 4.332608815  | 1.47353E-05 | 0.000813782 | igf2a            | ZDB-GENE-991111-3    | igf2a            |
| ENSDARG00000037962 | 160.9570158 | -0.666357973 | 0.153816927 | -4.332149822 | 1.4766E-05  | 0.000813782 | psmb7            | ZDB-GENE-001208-4    | psmb7            |
| ENSDARG00000061794 | 206.4710441 | 0.460651643  | 0.106481952 | 4.326100646  | 1.51772E-05 | 0.000834223 | jam3b            | ZDB-GENE-030131-441  | jam3b            |
| ENSDARG00000004529 | 2.766389635 | -3.630099828 | 0.839333612 | -4.324978501 | 1.52547E-05 | 0.000836263 | zgc:173742       | ZDB-GENE-030131-6489 | zgc:173742       |
| ENSDARG00000075737 | 12.90956288 | -8.339399734 | 1.929656562 | -4.321701539 | 1.54831E-05 | 0.000846543 | zgc:165518       | ZDB-GENE-070720-15   | zgc:165518       |
| ENSDARG00000007080 | 56.1957861  | -0.938972633 | 0.217655552 | -4.314030232 | 1.60305E-05 | 0.000874169 | rhcg1            | ZDB-GENE-060209-2    | rhcg1            |
| ENSDARG00000057687 | 16.22314425 | -1.299156467 | 0.301364589 | -4.310912802 | 1.62582E-05 | 0.000884258 | sbk3             | ZDB-GENE-080204-39   | sbk3             |
| ENSDARG00000092696 | 0.941695911 | -4.103325165 | 0.952161682 | -4.309483611 | 1.63636E-05 | 0.000887662 | cyp11a2          | ZDB-GENE-130911-1    | cyp11a2          |
| ENSDARG00000016016 | 317.3360226 | 0.380736068  | 0.088670992 | 4.293806325  | 1.75636E-05 | 0.00094955  | dbnlb            | ZDB-GENE-050522-293  | dbnlb            |
| ENSDARG00000017728 | 142.3460562 | -0.732477455 | 0.170647831 | -4.292333813 | 1.76805E-05 | 0.00094955  | phb2b            | ZDB-GENE-040718-430  | phb2b            |
| ENSDARG00000069095 | 57.29527822 | -0.838201947 | 0.195293522 | -4.292011012 | 1.77062E-05 | 0.00094955  | gls2a            | ZDB-GENE-081105-57   | gls2a            |
| ENSDARG00000091558 | 3.905836102 | -4.438333571 | 1.034095884 | -4.291994235 | 1.77076E-05 | 0.00094955  | si:ch211-251f6.7 | ZDB-GENE-091113-57   | si:ch211-251f6.7 |
| ENSDARG00000028507 | 704.107608  | -0.694978953 | 0.161936804 | -4.291667719 | 1.77336E-05 | 0.00094955  | itgb4            | ZDB-GENE-030131-7209 | itgb4            |
| ENSDARG00000025032 | 285.6760257 | 0.370009227  | 0.086247688 | 4.290077024  | 1.78611E-05 | 0.000953912 | nr3c1            | ZDB-GENE-050522-503  | nr3c1            |
| ENSDARG00000055514 | 80.7496699  | -0.934120817 | 0.217814401 | -4.288609068 | 1.79796E-05 | 0.000957769 | icn2             | ZDB-GENE-070822-9    | icn2             |
| ENSDARG00000094992 | 2.189712385 | -4.616654668 | 1.080838478 | -4.271364095 | 1.94281E-05 | 0.001032279 | otx1             | ZDB-GENE-980526-400  | otx1             |
| ENSDARG00000078280 | 3.186396629 | -3.492562031 | 0.818094668 | -4.269141664 | 1.96227E-05 | 0.001039951 | nkx3-1           | ZDB-GENE-081104-238  | nkx3-1           |
| ENSDARG00000058696 | 168.7028152 | 0.417102817  | 0.097716489 | 4.268499848  | 1.96792E-05 | 0.001040286 | tbl1xr1a         | ZDB-GENE-050522-314  | tbl1xr1a         |
| ENSDARG00000017058 | 119.4280841 | 0.597373565  | 0.139974796 | 4.267722346  | 1.97479E-05 | 0.001041262 | large2           | ZDB-GENE-050419-253  | large2           |
| ENSDARG00000038687 | 114.3863906 | 0.644286241  | 0.151023102 | 4.266143611  | 1.98881E-05 | 0.001045992 | nfbk2            | ZDB-GENE-030131-6701 | nfbk2            |
| ENSDARG00000032618 | 63.10175182 | 0.764011534  | 0.179330379 | 4.260357545  | 2.041E-05   | 0.001070725 | mgst1.1          | ZDB-GENE-041010-30   | mgst1.1          |
| ENSDARG00000102835 | 18.29660867 | 1.058491923  | 0.248519754 | 4.259186273  | 2.05172E-05 | 0.001073632 | CABZ01021435.1   |                      |                  |
| ENSDARG00000031702 | 65.91818218 | -0.934217972 | 0.219910324 | -4.248176964 | 2.15517E-05 | 0.001122117 | prkg1b           | ZDB-GENE-080225-40   | prkg1b           |
| ENSDARG00000009942 | 18.60678543 | -1.468591441 | 0.345699542 | -4.248172943 | 2.15521E-05 | 0.001122117 | cdc6             | ZDB-GENE-050506-131  | cdc6             |
| ENSDARG00000098995 | 4.287204823 | -3.581513206 | 0.843291186 | -4.247065862 | 2.16588E-05 | 0.001124848 | cyp2k6           | ZDB-GENE-040426-1571 | cyp2k6           |
| ENSDARG00000098739 | 6.27345322  | -6.947529348 | 1.636464807 | -4.245449899 | 2.18155E-05 | 0.001130153 | h2af1a1          |                      |                  |
| ENSDARG00000100741 | 31.8817518  | -1.455795909 | 0.343210188 | -4.241703659 | 2.21829E-05 | 0.001146322 | cdc20            | ZDB-GENE-040426-2044 | cdc20            |
| ENSDARG00000094005 | 5.223271077 | -2.16915345  | 0.511988197 | -4.236725497 | 2.26803E-05 | 0.001169108 | si:dkey-98j1.5   | ZDB-GENE-090313-358  | si:dkey-98j1.5   |
| ENSDARG00000053966 | 1.355236307 | -4.070857149 | 0.961400298 | -4.234299864 | 2.29265E-05 | 0.001178865 | cyp17a2          | ZDB-GENE-100822-1    | cyp17a2          |
| ENSDARG00000043004 | 7.502798228 | -1.915642648 | 0.453618261 | -4.223028073 | 2.41042E-05 | 0.001236353 | si:dkeyp-117h8.4 | ZDB-GENE-030804-4    | si:dkeyp-117h8.4 |
| ENSDARG00000043236 | 8.820878287 | -9.723224432 | 2.302742055 | -4.222454883 | 2.41656E-05 | 0.001236442 | ccna1            | ZDB-GENE-040311-2    | ccna1            |
| ENSDARG00000036848 | 112.7729195 | -0.877048817 | 0.207785821 | -4.220927165 | 2.433E-05   | 0.001241786 | slc43a2a         | ZDB-GENE-040426-964  | slc43a2a         |
| ENSDARG00000102366 | 13.1090728  | -1.848274052 | 0.437941107 | -4.220371237 | 2.439E-05   | 0.001241794 | micall2a         | ZDB-GENE-030131-5409 | micall2a         |
| ENSDARG00000052433 | 0.872496317 | -3.762244468 | 0.892745086 | -4.214242708 | 2.50618E-05 | 0.001272867 | inha             | ZDB-GENE-060503-554  | inha             |
| ENSDARG00000011545 | 262.1365021 | 0.351853616  | 0.083559433 | 4.210818605  | 2.54447E-05 | 0.001289157 | arrb2b           | ZDB-GENE-040426-1332 | arrb2b           |
| ENSDARG00000008278 | 9.488545653 | -1.511293211 | 0.359130582 | -4.208199706 | 2.57413E-05 | 0.001301005 | rcor2            | ZDB-GENE-040426-1812 | rcor2            |
| ENSDARG00000088143 | 28.23116915 | -0.986635108 | 0.234594441 | -4.205705398 | 2.60269E-05 | 0.001309505 | sema4gb          | ZDB-GENE-111117-1    | sema4gb          |

|                    |             |              |             |              |             |             |                |                      |                |
|--------------------|-------------|--------------|-------------|--------------|-------------|-------------|----------------|----------------------|----------------|
| ENSDARG00000087709 | 7.602806981 | -1.845869379 | 0.438904662 | -4.205627187 | 2.60359E-05 | 0.001309505 | fat3b          | ZDB-GENE-130530-969  | fat3b          |
| ENSDARG00000038563 | 144.0145071 | -0.63145406  | 0.150301403 | -4.201251925 | 2.65443E-05 | 0.001329847 | pitrm1         | ZDB-GENE-040426-2876 | pitrm1         |
| ENSDARG00000098766 | 1255.749671 | -0.585020972 | 0.139256096 | -4.201043894 | 2.65687E-05 | 0.001329847 | pcxa           | ZDB-GENE-090908-3    | pcxa           |
| ENSDARG00000052215 | 31.78390741 | 0.835305915  | 0.198901801 | 4.199589489  | 2.67399E-05 | 0.001335193 | btr02          | ZDB-GENE-060825-228  | btr02          |
| ENSDARG00000028048 | 27.28951367 | 0.696352023  | 0.165921801 | 4.196868771  | 2.70631E-05 | 0.001348079 | rdh8a          | ZDB-GENE-021115-3    | rdh8a          |
| ENSDARG00000039650 | 20.70048627 | -0.984694671 | 0.234705507 | -4.195447674 | 2.72333E-05 | 0.001353306 | itm2cb         | ZDB-GENE-030131-7806 | itm2cb         |
| ENSDARG00000079560 | 335.0370807 | 0.812144608  | 0.193926026 | 4.187909306  | 2.81536E-05 | 0.001393559 | ptprh          | ZDB-GENE-091118-90   | ptprh          |
| ENSDARG00000025386 | 5.158199785 | -6.946627691 | 1.658811427 | -4.187713914 | 2.81778E-05 | 0.001393559 | lsm14b         | ZDB-GENE-040426-779  | lsm14b         |
| ENSDARG00000089181 | 1.199671608 | -4.857300342 | 1.16045479  | -4.185686839 | 2.84305E-05 | 0.001402707 | adad1          | ZDB-GENE-030131-6285 | adad1          |
| ENSDARG00000019815 | 668.8773369 | 0.463934329  | 0.110860156 | 4.184860867  | 2.85341E-05 | 0.001404473 | fn1a           | ZDB-GENE-000426-1    | fn1a           |
| ENSDARG00000043970 | 335.7961559 | -0.485834807 | 0.116111316 | -4.184215817 | 2.86152E-05 | 0.001405129 | lrpprc         | ZDB-GENE-030131-7887 | lrpprc         |
| ENSDARG00000037012 | 111.9606082 | -0.707782863 | 0.169395939 | -4.178275263 | 2.93728E-05 | 0.00143892  | slc3a2b        | ZDB-GENE-040122-2    | slc3a2b        |
| ENSDARG00000099247 | 5.252380094 | -2.911760323 | 0.697147074 | -4.176680115 | 2.95795E-05 | 0.001443281 | si:dkey-68o6.5 | ZDB-GENE-030131-5416 | si:dkey-68o6.5 |
| ENSDARG00000043257 | 1250.704529 | 0.495988651  | 0.118756628 | 4.176513411  | 2.96011E-05 | 0.001443281 | ckbb           | ZDB-GENE-020103-2    | ckbb           |
| ENSDARG00000008310 | 118.5000613 | -0.488603476 | 0.117063972 | -4.173815982 | 2.9954E-05  | 0.001457057 | ip6k2a         | ZDB-GENE-030131-760  | ip6k2a         |
| ENSDARG00000007349 | 2.577174329 | -3.605954393 | 0.865016201 | -4.168655325 | 3.06402E-05 | 0.001483705 | dmrt1          | ZDB-GENE-050511-1    | dmrt1          |
| ENSDARG00000096603 | 5.599978172 | -2.575500299 | 0.617859348 | -4.168424911 | 3.06712E-05 | 0.001483705 | bmb            | ZDB-GENE-030131-5577 | bmb            |
| ENSDARG00000012021 | 114.2964594 | -0.472291675 | 0.113311993 | -4.168064324 | 3.07197E-05 | 0.001483705 | kdsr           | ZDB-GENE-040426-853  | kdsr           |
| ENSDARG00000007099 | 37.41527642 | -1.027494445 | 0.246546008 | -4.167556606 | 3.07882E-05 | 0.001483705 | cx43.4         | ZDB-GENE-990415-38   | cx43.4         |
| ENSDARG00000055622 | 2.881173194 | -3.149681637 | 0.756091508 | -4.165741321 | 3.10342E-05 | 0.001492092 | zgc:153345     | ZDB-GENE-061103-487  | zgc:153345     |
| ENSDARG00000078567 | 194.5547317 | -0.806969287 | 0.19376878  | -4.164599098 | 3.119E-05   | 0.001492826 | lonrf1l        | ZDB-GENE-081104-397  | lonrf1l        |
| ENSDARG00000077836 | 10.48042326 | -1.128101833 | 0.270880557 | -4.164572926 | 3.11936E-05 | 0.001492826 | ttc22          | ZDB-GENE-050208-292  | ttc22          |
| ENSDARG00000057571 | 846.9048483 | -0.701772385 | 0.168605338 | -4.162219268 | 3.15169E-05 | 0.001504186 | pgam2          | ZDB-GENE-040116-6    | pgam2          |
| ENSDARG00000036834 | 2065.003506 | 0.795874852  | 0.191233746 | 4.161790834  | 3.15762E-05 | 0.001504186 | krt92          | ZDB-GENE-050417-363  | krt92          |
| ENSDARG00000012369 | 30.7987711  | -1.101257946 | 0.264778422 | -4.159168023 | 3.19409E-05 | 0.001517462 | rdh10b         | ZDB-GENE-030909-7    | rdh10b         |
| ENSDARG00000002267 | 86.38620638 | -0.595495089 | 0.143191353 | -4.158736385 | 3.20013E-05 | 0.001517462 | dcaf13         | ZDB-GENE-040426-703  | dcaf13         |
| ENSDARG00000040081 | 2.146549227 | -4.32623669  | 1.041271293 | -4.154764199 | 3.25623E-05 | 0.00154054  | zp3d.1         | ZDB-GENE-030131-5827 | zp3d.1         |
| ENSDARG00000019613 | 383.418124  | -0.479890428 | 0.115531501 | -4.1537626   | 3.27052E-05 | 0.001543777 | ip6k2b         | ZDB-GENE-040718-85   | ip6k2b         |
| ENSDARG00000025788 | 98.63654305 | 0.563754387  | 0.135798127 | 4.151415027  | 3.30426E-05 | 0.001556156 | chp2           | ZDB-GENE-030131-5810 | chp2           |
| ENSDARG00000076334 | 75.12068176 | -0.697670691 | 0.168283943 | -4.145794781 | 3.38637E-05 | 0.00159121  | mrpl43         | ZDB-GENE-040718-125  | mrpl43         |
| ENSDARG00000102435 | 18.71855072 | 1.24349119   | 0.300235902 | 4.141713838  | 3.4472E-05  | 0.00161613  | plekhf1        | ZDB-GENE-040426-1289 | plekhf1        |
| ENSDARG00000101878 | 24.79662289 | 0.667269155  | 0.161135519 | 4.141043272  | 3.4573E-05  | 0.001617203 | kdf1b          | ZDB-GENE-100922-285  | kdf1b          |
| ENSDARG00000054288 | 69.45280502 | -0.76395648  | 0.184756048 | -4.134947073 | 3.55036E-05 | 0.001656997 | zgc:63972      | ZDB-GENE-040426-1320 | zgc:63972      |
| ENSDARG00000086173 | 114.4139546 | 0.49026883   | 0.11861883  | 4.133145043  | 3.57833E-05 | 0.001666294 | relb           | ZDB-GENE-030131-9531 | relb           |
| ENSDARG00000052375 | 1.851318015 | -3.337584767 | 0.808601836 | -4.127599788 | 3.66569E-05 | 0.00170315  | zgc:66455      | ZDB-GENE-040426-1642 | zgc:66455      |
| ENSDARG00000070484 | 185.8256424 | -0.794560926 | 0.192542246 | -4.12668358  | 3.68032E-05 | 0.001706122 | zgc:195001     | ZDB-GENE-081022-173  | zgc:195001     |
| ENSDARG00000007294 | 1362.934794 | -0.391141956 | 0.094820644 | -4.125071725 | 3.70619E-05 | 0.001714279 | aco2           | ZDB-GENE-030131-1390 | aco2           |
| ENSDARG00000055837 | 304.9824387 | 0.352614675  | 0.085579356 | 4.120324023  | 3.7834E-05  | 0.001742454 | arhgef1b       | ZDB-GENE-060616-136  | arhgef1b       |
| ENSDARG00000078773 | 31.03100734 | -0.894355719 | 0.217067976 | -4.120164264 | 3.78602E-05 | 0.001742454 | tmem70         | ZDB-GENE-070912-593  | tmem70         |
| ENSDARG00000069279 | 32.55635148 | -0.991467724 | 0.240664082 | -4.119716234 | 3.79339E-05 | 0.001742454 | elovl7a        | ZDB-GENE-030131-6149 | elovl7a        |
| ENSDARG00000096867 | 86.76972783 | 0.575521704  | 0.139714474 | 4.119270451  | 3.80074E-05 | 0.001742454 | clmn           | ZDB-GENE-131127-546  | clmn           |
| ENSDARG00000010130 | 303.1599092 | 0.637336851  | 0.154750411 | 4.118482439  | 3.81376E-05 | 0.001744562 | smpdl3b        | ZDB-GENE-041008-132  | smpdl3b        |
| ENSDARG00000031336 | 88.17168821 | -0.733631953 | 0.178328347 | -4.113939059 | 3.88964E-05 | 0.001772654 | hsd20b2        | ZDB-GENE-030804-21   | hsd20b2        |
| ENSDARG00000020289 | 4.914608185 | -2.776458565 | 0.674916184 | -4.113782765 | 3.89228E-05 | 0.001772654 | pif1           | ZDB-GENE-030131-4928 | pif1           |
| ENSDARG00000022303 | 148.0871052 | -0.883517074 | 0.214964974 | -4.110051322 | 3.95571E-05 | 0.001796174 | higd1a         | ZDB-GENE-030826-15   | higd1a         |
| ENSDARG00000113246 | 1.573710341 | -5.179410167 | 1.260280543 | -4.109727945 | 3.96126E-05 | 0.001796174 | CABZ01051901.1 |                      |                |

|                     |             |              |             |              |             |             |                   |                      |                   |
|---------------------|-------------|--------------|-------------|--------------|-------------|-------------|-------------------|----------------------|-------------------|
| ENSDARG00000044299  | 156.8032186 | -0.503083297 | 0.122436383 | -4.108936295 | 3.97486E-05 | 0.001798406 | lmnb1             | ZDB-GENE-020424-2    | lmnb1             |
| ENSDARG00000078878  | 14.27373158 | 1.756365749  | 0.427849552 | 4.105101296  | 4.04138E-05 | 0.001824519 | si:ch73-244f7.3   | ZDB-GENE-121214-178  | si:ch73-244f7.3   |
| ENSDARG00000027065  | 395.9033516 | -0.808370177 | 0.197171609 | -4.099830499 | 4.13453E-05 | 0.001858815 | slc38a3a          | ZDB-GENE-070615-25   | slc38a3a          |
| ENSDARG00000038199  | 86.90061253 | -1.243133666 | 0.303243568 | -4.09945601  | 4.14122E-05 | 0.001858815 | cdab              | ZDB-GENE-040426-1911 | cdab              |
| ENSDARG00000087392  | 15.91016015 | -9.211682132 | 2.247142723 | -4.099286635 | 4.14426E-05 | 0.001858815 | si:ch73-160p18.3  | ZDB-GENE-141212-268  | si:ch73-160p18.3  |
| ENSDARG00000059836  | 103.4866718 | 0.598017068  | 0.146000596 | 4.095990581  | 4.20367E-05 | 0.001881392 | ddit3             | ZDB-GENE-070410-90   | ddit3             |
| ENSDARG00000105626  | 1.144275373 | -5.636612592 | 1.376476301 | -4.094957965 | 4.22245E-05 | 0.001885724 | adad2             | ZDB-GENE-130530-788  | adad2             |
| ENSDARG00000038785  | 198.5896654 | -0.895219207 | 0.218704662 | -4.093279034 | 4.25315E-05 | 0.001895352 | abcf2a            | ZDB-GENE-030131-8714 | abcf2a            |
| ENSDARG00000041734  | 8.016349782 | -1.336112446 | 0.326519362 | -4.091985351 | 4.27696E-05 | 0.001901869 | tbc1d32           | ZDB-GENE-061106-5    | tbc1d32           |
| ENSDARG00000079901  | 172.8904902 | 0.751125061  | 0.183675271 | 4.089418545  | 4.32456E-05 | 0.001918919 | si:ch73-15n24.1   | ZDB-GENE-030131-1323 | si:ch73-15n24.1   |
| ENSDARG00000060109  | 30.04494609 | 0.726887471  | 0.177834349 | 4.087441348  | 4.36157E-05 | 0.001931206 | aggf1             | ZDB-GENE-060929-836  | aggf1             |
| ENSDARG00000089967  | 15.58612377 | -1.253110785 | 0.306729212 | -4.085397599 | 4.40014E-05 | 0.00194413  | si:ch211-59o9.10  | ZDB-GENE-101206-1    | si:ch211-59o9.10  |
| ENSDARG00000092924  | 26.87528586 | -10.7565266  | 2.633508164 | -4.084485761 | 4.41745E-05 | 0.001947627 | zgc:171474        | ZDB-GENE-080215-16   | zgc:171474        |
| ENSDARG00000034989  | 10.57493606 | -7.675949184 | 1.883415665 | -4.075547064 | 4.59063E-05 | 0.002019682 | retsatl           | ZDB-GENE-051113-252  | retsatl           |
| ENSDARG00000044365  | 329.8302318 | 0.778605702  | 0.191230542 | 4.071555159  | 4.67003E-05 | 0.002050262 | angptl3           | ZDB-GENE-010817-3    | angptl3           |
| ENSDARG00000103826  | 327.7713301 | -0.790413467 | 0.194412262 | -4.065656444 | 4.78975E-05 | 0.002098374 | gpib              | ZDB-GENE-020513-3    | gpib              |
| ENSDARG00000104643  | 2.037701381 | -3.175487722 | 0.782299171 | -4.059173062 | 4.92468E-05 | 0.002152937 | tuba7l            | ZDB-GENE-040704-78   | tuba7l            |
| ENSDARG00000071594  | 18.72034728 | -0.861715693 | 0.212497832 | -4.05517404  | 5.0097E-05  | 0.002185494 | TIMM21            | ZDB-GENE-120709-89   | si:dkey-118j18.1  |
| ENSDARG00000060682  | 37.1764035  | -1.040216017 | 0.256607057 | -4.053731133 | 5.04071E-05 | 0.002194405 | agr1              | ZDB-GENE-030131-7249 | agr1              |
| ENSDARG00000078309  | 93.4031951  | -0.864197049 | 0.213385889 | -4.049925953 | 5.12338E-05 | 0.002225718 | fam83b            | ZDB-GENE-030131-7066 | fam83b            |
| ENSDARG00000012215  | 35.98367953 | -0.829471077 | 0.205054972 | -4.045115644 | 5.22973E-05 | 0.002267165 | umps              | ZDB-GENE-040426-785  | umps              |
| ENSDARG00000017388  | 194.9213588 | 0.68219595   | 0.168701553 | 4.043803608  | 5.2591E-05  | 0.002275136 | gstt1b            | ZDB-GENE-040426-1491 | gstt1b            |
| ENSDARG00000032708  | 23.94890379 | -0.875010845 | 0.216563847 | -4.040428986 | 5.33535E-05 | 0.002303316 | arl4cb            | ZDB-GENE-040426-2382 | arl4cb            |
| ENSDARG00000022615  | 167.3912952 | -1.059031398 | 0.262402473 | -4.035904788 | 5.43923E-05 | 0.002343278 | si:ch211-241e1.3  | ZDB-GENE-030131-230  | si:ch211-241e1.3  |
| ENSDARG00000087779  | 173.5098501 | -0.650835847 | 0.16134468  | -4.033822799 | 5.48767E-05 | 0.002359243 | pum3              | ZDB-GENE-030131-9808 | pum3              |
| ENSDARG00000104188  | 23.27803871 | 1.009370085  | 0.25040873  | 4.030890163  | 5.5566E-05  | 0.002383931 | fam83fb           | ZDB-GENE-041114-194  | fam83fb           |
| ENSDARG00000011445  | 60.44159321 | 0.619173465  | 0.153701908 | 4.028404545  | 5.61567E-05 | 0.002399171 | elmsan1a          | ZDB-GENE-041001-151  | elmsan1a          |
| ENSDARG000000098622 | 13.0291191  | -1.249072956 | 0.310081374 | -4.028210207 | 5.62031E-05 | 0.002399171 | ccne1             | ZDB-GENE-980526-168  | ccne1             |
| ENSDARG00000100918  | 17.4717531  | -1.225599821 | 0.304274872 | -4.027936359 | 5.62686E-05 | 0.002399171 | prc1a             | ZDB-GENE-020801-3    | prc1a             |
| ENSDARG00000013072  | 89.98521624 | 0.504049031  | 0.125172564 | 4.026833156  | 5.65331E-05 | 0.002405502 | mmp15b            | ZDB-GENE-070817-6    | mmp15b            |
| ENSDARG00000043850  | 11.33274158 | 1.199999644  | 0.298061337 | 4.026015772  | 5.67299E-05 | 0.002408928 | ftr54             | ZDB-GENE-070620-19   | ftr54             |
| ENSDARG00000002071  | 124.890102  | -0.605830057 | 0.150521732 | -4.024867704 | 5.70074E-05 | 0.002415327 | adss              | ZDB-GENE-050417-337  | adss              |
| ENSDARG00000077039  | 35.64843662 | 0.747201329  | 0.185666416 | 4.024429099  | 5.71137E-05 | 0.002415327 | esama             | ZDB-GENE-090629-1    | esama             |
| ENSDARG00000089567  | 6.27235762  | -7.63663498  | 1.898129908 | -4.02324148  | 5.74026E-05 | 0.0024226   | patl2             | ZDB-GENE-121214-350  | patl2             |
| ENSDARG00000116290  | 4.52070013  | -23.96987371 | 5.970749425 | -4.01455027  | 5.95592E-05 | 0.00250851  | si:ch211-250e5.16 | ZDB-GENE-030131-6052 | si:ch211-250e5.16 |
| ENSDARG00000074589  | 146.2124841 | 0.446833954  | 0.111355421 | 4.012682539  | 6.00326E-05 | 0.002523319 | rin2              | ZDB-GENE-090312-194  | rin2              |
| ENSDARG00000033845  | 66.27410513 | -0.848775572 | 0.211588826 | -4.011438542 | 6.03499E-05 | 0.002531519 | igsf9ba           | ZDB-GENE-060503-729  | igsf9ba           |
| ENSDARG00000074169  | 106.2479695 | -0.540639196 | 0.135082446 | -4.002290552 | 6.27322E-05 | 0.002626134 | gpam              | ZDB-GENE-101026-1    | gpam              |
| ENSDARG00000074858  | 209.4179321 | -0.400712105 | 0.100177381 | -4.000025768 | 6.33356E-05 | 0.00264602  | stard7            | ZDB-GENE-030131-2310 | stard7            |
| ENSDARG00000114552  | 6.486766574 | -2.153371534 | 0.538403234 | -3.999551632 | 6.34626E-05 | 0.00264602  | siva1             | ZDB-GENE-050506-57   | siva1             |
| ENSDARG00000099985  | 22.71455602 | 0.916477466  | 0.229483686 | 3.993649744  | 6.5064E-05  | 0.00270734  | ccn1l2            | ZDB-GENE-060404-5    | ccn1l2            |
| ENSDARG00000038068  | 1282.847781 | -0.429984147 | 0.107688615 | -3.992846845 | 6.52847E-05 | 0.002711083 | ddx5              | ZDB-GENE-030131-925  | ddx5              |
| ENSDARG00000098215  | 83.44535696 | -0.574762227 | 0.144025063 | -3.990709783 | 6.58759E-05 | 0.002725432 | BICD2             |                      |                   |
| ENSDARG00000028676  | 527.4698065 | 0.506961841  | 0.127037508 | 3.990646913  | 6.58933E-05 | 0.002725432 | nuak1b            | ZDB-GENE-131120-18   | nuak1b            |
| ENSDARG00000069335  | 58.73605119 | 0.629951956  | 0.157941754 | 3.988508048  | 6.64901E-05 | 0.002744639 | bcl6b             | ZDB-GENE-120907-1    | bcl6b             |
| ENSDARG00000099631  | 205.1172742 | 0.390631838  | 0.098025841 | 3.984988362  | 6.74834E-05 | 0.002780103 | cmtm6             | ZDB-GENE-030729-15   | cmtm6             |

|                    |             |              |             |              |             |             |                  |                      |                  |
|--------------------|-------------|--------------|-------------|--------------|-------------|-------------|------------------|----------------------|------------------|
| ENSDARG0000007302  | 113.1051666 | 0.569247094  | 0.143054533 | 3.97923142   | 6.91384E-05 | 0.002842631 | sh3gl3b          | ZDB-GENE-040121-4    | sh3gl3b          |
| ENSDARG00000043587 | 150.590179  | -0.525530372 | 0.132104965 | -3.978127339 | 6.94602E-05 | 0.002850205 | srds5a2a         | ZDB-GENE-050417-199  | srds5a2a         |
| ENSDARG00000105479 | 23.4411577  | -1.080060733 | 0.271627926 | -3.976250712 | 7.00103E-05 | 0.002867102 | si:ch211-126c2.4 | ZDB-GENE-030131-3087 | si:ch211-126c2.4 |
| ENSDARG00000035601 | 42.50612471 | 0.959991647  | 0.241495694 | 3.975191566  | 7.03226E-05 | 0.002874212 | dao.3            | ZDB-GENE-040426-1894 | dao.3            |
| ENSDARG00000056339 | 2.094263541 | -2.743467402 | 0.690448351 | -3.973457826 | 7.08367E-05 | 0.002889524 | stk31            | ZDB-GENE-140106-59   | stk31            |
| ENSDARG00000060215 | 60.86469117 | -0.611844693 | 0.154110704 | -3.970163505 | 7.18233E-05 | 0.002924014 | cep85            | ZDB-GENE-030131-1998 | cep85            |
| ENSDARG00000054848 | 129.9964219 | -0.804389249 | 0.202975094 | -3.962994835 | 7.40154E-05 | 0.003001228 | pdk4             | ZDB-GENE-060503-754  | pdk4             |
| ENSDARG00000041051 | 65.62418397 | -0.942482248 | 0.237832453 | -3.96279917  | 7.40761E-05 | 0.003001228 | mid1ip1a         | ZDB-GENE-990415-81   | mid1ip1a         |
| ENSDARG00000092498 | 3.260334585 | -6.927771096 | 1.748312761 | -3.962546776 | 7.41545E-05 | 0.003001228 | si:dkeyp-46h3.2  | ZDB-GENE-030131-7351 | si:dkeyp-46h3.2  |
| ENSDARG00000071294 | 11.40950812 | -1.346618476 | 0.340042893 | -3.96014298  | 7.49049E-05 | 0.003025691 | tonsl            | ZDB-GENE-041111-230  | tonsl            |
| ENSDARG00000086112 | 47.94473976 | -1.00474419  | 0.253783655 | -3.959057927 | 7.5246E-05  | 0.003035551 | si:ch211-266i6.3 | ZDB-GENE-030131-5420 | si:ch211-266i6.3 |
| ENSDARG00000077257 | 11.6606712  | -1.345306673 | 0.339926952 | -3.957634615 | 7.56956E-05 | 0.003039925 | timd4            | ZDB-GENE-080303-10   | timd4            |
| ENSDARG00000016011 | 526.7834959 | -0.566008529 | 0.143017075 | -3.957629027 | 7.56974E-05 | 0.003039925 | gpcpd1           | ZDB-GENE-060503-472  | gpcpd1           |
| ENSDARG00000043334 | 290.9868826 | 0.507280064  | 0.128239663 | 3.955718942  | 7.63048E-05 | 0.003058392 | ccdc6a           | ZDB-GENE-030131-7848 | ccdc6a           |
| ENSDARG00000062182 | 60.40142809 | -0.753982373 | 0.190720394 | -3.953339008 | 7.70681E-05 | 0.003075395 | slc22a7b.3       | ZDB-GENE-131120-103  | slc22a7b.3       |
| ENSDARG00000101018 | 47.72694122 | -0.650029254 | 0.164425643 | -3.953332588 | 7.70702E-05 | 0.003075395 | ptdss2           | ZDB-GENE-130424-2    | ptdss2           |
| ENSDARG00000092290 | 15.9178556  | -1.315956533 | 0.332899894 | -3.95300977  | 7.71743E-05 | 0.003075395 | si:dkeyp-26a9.2  | ZDB-GENE-090313-379  | si:dkeyp-26a9.2  |
| ENSDARG00000002479 | 32.44616629 | -0.932784725 | 0.236380789 | -3.946110549 | 7.9431E-05  | 0.003159248 | ercc6l           | ZDB-GENE-060531-56   | ercc6l           |
| ENSDARG00000103295 | 4067.985619 | 1.035061811  | 0.262341918 | 3.945468635  | 7.96441E-05 | 0.003161655 | cyp3a65          | ZDB-GENE-050604-1    | cyp3a65          |
| ENSDARG00000100116 | 25.66073951 | -0.891253644 | 0.225966135 | -3.944191208 | 8.00698E-05 | 0.003172477 | mrps24           | ZDB-GENE-050522-393  | mrps24           |
| ENSDARG00000089717 | 33.43646641 | -0.90209372  | 0.228792106 | -3.942853345 | 8.05179E-05 | 0.003184145 | qpct             | ZDB-GENE-130827-1    | qpct             |
| ENSDARG00000014047 | 105.1403437 | -0.58089631  | 0.147485657 | -3.938663073 | 8.19369E-05 | 0.003234088 | cldn7b           | ZDB-GENE-001103-5    | cldn7b           |
| ENSDARG00000016908 | 11.99639237 | -8.59262172  | 2.182694208 | -3.936704321 | 8.26083E-05 | 0.003248483 | zgc:171779       | ZDB-GENE-071004-38   | zgc:171779       |
| ENSDARG00000076830 | 215.6169605 | -1.726352975 | 0.438529678 | -3.936684476 | 8.26151E-05 | 0.003248483 | si:dkey-65b12.6  | ZDB-GENE-060526-329  | si:dkey-65b12.6  |
| ENSDARG00000061660 | 43.69829957 | -0.849786425 | 0.215888923 | -3.936220587 | 8.27749E-05 | 0.003248601 | CABZ01055347.1   |                      |                  |
| ENSDARG00000041797 | 1278.06918  | -0.521876981 | 0.13269015  | -3.93304991  | 8.38748E-05 | 0.003285546 | cx28.9           | ZDB-GENE-041114-200  | cx28.9           |
| ENSDARG00000007077 | 95.98302219 | 0.514801494  | 0.131069822 | 3.927688968  | 8.5766E-05  | 0.003347608 | ankrd50l         | ZDB-GENE-041008-117  | ankrd50l         |
| ENSDARG00000068465 | 3.085370513 | -5.338527354 | 1.359323265 | -3.927342002 | 8.58898E-05 | 0.003347608 | zgc:136254       | ZDB-GENE-060421-3062 | zgc:136254       |
| ENSDARG00000011533 | 96.94682384 | 0.644001069  | 0.163985176 | 3.927190774  | 8.59438E-05 | 0.003347608 | sema6dl          | ZDB-GENE-050417-171  | sema6dl          |
| ENSDARG00000012776 | 75.27108668 | 0.544635302  | 0.138941978 | 3.919875823  | 8.85946E-05 | 0.003444385 | smarca1          | ZDB-GENE-070705-296  | smarca1          |
| ENSDARG00000012387 | 694.982175  | -0.300826549 | 0.076755332 | -3.919291883 | 8.88095E-05 | 0.003446275 | pdha1a           | ZDB-GENE-040426-2719 | pdha1a           |
| ENSDARG00000054616 | 186.9797065 | -0.586454612 | 0.149651159 | -3.918811035 | 8.89868E-05 | 0.003446702 | cldni            | ZDB-GENE-010328-9    | cldni            |
| ENSDARG00000077638 | 2.359358942 | -2.893621336 | 0.738496407 | -3.918260547 | 8.91903E-05 | 0.003448136 | zgc:171965       | ZDB-GENE-070820-20   | zgc:171965       |
| ENSDARG00000076554 | 113.0467061 | -0.901104869 | 0.230019861 | -3.917508976 | 8.94687E-05 | 0.003450369 | cdkn1a           | ZDB-GENE-070705-7    | cdkn1a           |
| ENSDARG00000077875 | 145.6146329 | 0.988418836  | 0.252327485 | 3.917206393  | 8.9581E-05  | 0.003450369 | slc2a5           | ZDB-GENE-060222-2    | slc2a5           |
| ENSDARG00000089924 | 106.8874294 | 0.488790675  | 0.124920782 | 3.912805105  | 9.12302E-05 | 0.003503779 | aldh2.1          | ZDB-GENE-040426-1262 | aldh2.1          |
| ENSDARG00000014402 | 1.715586943 | -3.62159673  | 0.92562293  | -3.912604812 | 9.13059E-05 | 0.003503779 | smc1b            | ZDB-GENE-091217-1    | smc1b            |
| ENSDARG00000052731 | 13.88585863 | -1.452448113 | 0.371357084 | -3.911189999 | 9.18425E-05 | 0.003513741 | ankrd31          | ZDB-GENE-050417-473  | ankrd31          |
| ENSDARG00000043002 | 104.8401532 | 1.000829571  | 0.25589945  | 3.911026657  | 9.19046E-05 | 0.003513741 | vm01a            | ZDB-GENE-131121-600  | vm01a            |
| ENSDARG00000086529 | 3.637523651 | -6.046575452 | 1.546797001 | -3.909094373 | 9.26428E-05 | 0.003535439 | si:dkey-90l23.2  | ZDB-GENE-041008-200  | si:dkey-90l23.2  |
| ENSDARG00000062780 | 43.00928468 | -0.92065845  | 0.235630102 | -3.907219168 | 9.33645E-05 | 0.003556431 | aifm3            | ZDB-GENE-140619-2    | aifm3            |
| ENSDARG00000062502 | 11.97099266 | 1.241680172  | 0.318288608 | 3.901114093  | 9.5751E-05  | 0.003640647 | si:ch73-196l6.5  | ZDB-GENE-140106-79   | si:ch73-196l6.5  |
| ENSDARG00000013752 | 5794.49388  | 0.803029999  | 0.205916873 | 3.899777541  | 9.62811E-05 | 0.003654097 | tnni2a.3         | ZDB-GENE-040718-80   | tnni2a.3         |
| ENSDARG00000101156 | 1.153323032 | -3.717871036 | 0.953469238 | -3.899308847 | 9.64677E-05 | 0.003654484 | slco1f2          | ZDB-GENE-080305-3    | slco1f2          |
| ENSDARG00000092778 | 66.00734491 | -1.241706407 | 0.318648534 | -3.896789958 | 9.74761E-05 | 0.003685948 | si:ch73-338o16.4 | ZDB-GENE-131119-14   | si:ch73-338o16.4 |
| ENSDARG00000077298 | 98.89225758 | 0.475224916  | 0.122306789 | 3.885515427  | 0.000102113 | 0.003854255 | gas1a            | ZDB-GENE-050302-155  | gas1a            |

|                     |             |              |             |              |             |             |                   |                      |                   |
|---------------------|-------------|--------------|-------------|--------------|-------------|-------------|-------------------|----------------------|-------------------|
| ENSDARG00000079175  | 272.8376515 | 0.656813028  | 0.169254579 | 3.880621907  | 0.00010419  | 0.003925489 | si:ch211-79k12.1  | ZDB-GENE-080303-9    | si:ch211-79k12.1  |
| ENSDARG00000017798  | 146.3739871 | 0.435560891  | 0.112253254 | 3.880162703  | 0.000104387 | 0.003925777 | bcor              | ZDB-GENE-040408-1    | bcor              |
| ENSDARG00000026787  | 15.49249049 | -0.903429825 | 0.232900653 | -3.879035178 | 0.000104872 | 0.003936864 | aqp7              | ZDB-GENE-030131-6461 | aqp7              |
| ENSDARG000000105863 | 12.23693512 | 1.32800429   | 0.342774788 | 3.874276457  | 0.000106942 | 0.004007326 | FO904970.1        |                      |                   |
| ENSDARG000000101754 | 63.38771707 | 0.627819381  | 0.162273253 | 3.868902419  | 0.000109326 | 0.00408928  | BX664622.1        |                      |                   |
| ENSDARG00000045444  | 73.01851394 | 0.721019672  | 0.186447681 | 3.867142067  | 0.000110118 | 0.004111479 | fzd8a             | ZDB-GENE-000328-3    | fzd8a             |
| ENSDARG00000044551  | 74.48542531 | 0.728405349  | 0.1886749   | 3.860637251  | 0.000113092 | 0.004214903 | atg9a             | ZDB-GENE-070209-65   | atg9a             |
| ENSDARG00000014685  | 30.05566103 | -1.057125304 | 0.273928145 | -3.85913358  | 0.00011379  | 0.004233305 | esco2             | ZDB-GENE-050913-156  | esco2             |
| ENSDARG00000094836  | 29.20104746 | 0.935159669  | 0.242396168 | 3.85798041   | 0.000114328 | 0.0042457   | si:ch211-195b15.8 | ZDB-GENE-131127-627  | si:ch211-195b15.8 |
| ENSDARG00000096849  | 107.1919847 | -0.560410577 | 0.145278792 | -3.85748374  | 0.00011456  | 0.004246724 | si:dkey-16p21.8   | ZDB-GENE-131121-428  | si:dkey-16p21.8   |
| ENSDARG00000043137  | 15.76855314 | -1.394005909 | 0.361571933 | -3.855404087 | 0.000115539 | 0.004275342 | cdca8             | ZDB-GENE-041114-171  | cdca8             |
| ENSDARG00000014386  | 89.3575848  | -0.459834494 | 0.119312664 | -3.85402921  | 0.00011619  | 0.004291771 | galnt6            | ZDB-GENE-040426-2272 | galnt6            |
| ENSDARG00000062297  | 105.3152914 | -0.751384036 | 0.195061507 | -3.852036455 | 0.00011714  | 0.004319157 | soat1             | ZDB-GENE-081105-177  | soat1             |
| ENSDARG000000104408 | 26.86981041 | 0.735566486  | 0.1910133   | 3.85086529   | 0.000117701 | 0.004332158 | zgc:152774        | ZDB-GENE-060929-544  | zgc:152774        |
| ENSDARG00000079369  | 202.8851147 | -0.773946975 | 0.201159632 | -3.847426882 | 0.000119365 | 0.004385601 | si:ch211-212g7.6  | ZDB-GENE-030131-4695 | si:ch211-212g7.6  |
| ENSDARG00000017982  | 92.65465618 | 1.090147555  | 0.283450446 | 3.845989903  | 0.000120067 | 0.004403579 | cyp39a1           | ZDB-GENE-041014-339  | cyp39a1           |
| ENSDARG00000061062  | 54.51913779 | 0.497144235  | 0.129303138 | 3.844796371  | 0.000120653 | 0.004417249 | nemp2             | ZDB-GENE-081104-413  | nemp2             |
| ENSDARG00000078430  | 81.92267717 | -0.6199803   | 0.1613797   | -3.841749002 | 0.000122161 | 0.004464576 | tiam1a            | ZDB-GENE-080325-1    | tiam1a            |
| ENSDARG00000001015  | 137.3748048 | 0.329535324  | 0.085798689 | 3.840796731  | 0.000122636 | 0.004474042 | znf384l           | ZDB-GENE-030616-498  | znf384l           |
| ENSDARG00000056913  | 735.2497629 | 0.394217407  | 0.102693898 | 3.838761754  | 0.000123656 | 0.004503351 | pcolcea           | ZDB-GENE-041014-370  | pcolcea           |
| ENSDARG000000102434 | 4.392897082 | 1.860073704  | 0.485060084 | 3.83472845   | 0.000125703 | 0.004569859 | si:dkey-13m1.2    | ZDB-GENE-141216-261  | si:dkey-13m1.2    |
| ENSDARG00000079703  | 92.76673721 | 0.92420493   | 0.241093107 | 3.833394243  | 0.000126387 | 0.004581978 | si:dkey-18p12.4   | ZDB-GENE-070912-408  | si:dkey-18p12.4   |
| ENSDARG00000044362  | 10.11453431 | -1.081403687 | 0.282113927 | -3.833216238 | 0.000126479 | 0.004581978 | unc119b           | ZDB-GENE-050201-2    | unc119b           |
| ENSDARG00000099757  | 23.86613728 | -0.936335377 | 0.244325239 | -3.83233178  | 0.000126934 | 0.004590462 | wdr47b            | ZDB-GENE-121114-10   | wdr47b            |
| ENSDARG00000011170  | 1299.781712 | -0.394820873 | 0.103057525 | -3.831072718 | 0.000127586 | 0.00460598  | ndrg2             | ZDB-GENE-041212-15   | ndrg2             |
| ENSDARG00000016439  | 61.25759538 | -0.685901121 | 0.179220091 | -3.827144137 | 0.000129639 | 0.00467195  | slc7a1            | ZDB-GENE-091116-69   | slc7a1            |
| ENSDARG00000045835  | 920.4100579 | 1.054993329  | 0.275704465 | 3.82653697   | 0.000129959 | 0.004675352 | si:dkey-14d8.6    | ZDB-GENE-041210-124  | si:dkey-14d8.6    |
| ENSDARG00000079377  | 17.70589469 | 0.867355859  | 0.226781814 | 3.824627051  | 0.00013097  | 0.004698764 | arhgef38          | ZDB-GENE-090313-83   | arhgef38          |
| ENSDARG00000058232  | 128.6459073 | 0.530503674  | 0.138713619 | 3.824452682  | 0.000131063 | 0.004698764 | fbrsl1            | ZDB-GENE-070705-487  | fbrsl1            |
| ENSDARG00000008541  | 14.6036298  | -1.818086222 | 0.475957143 | -3.819852791 | 0.000133531 | 0.004773809 | chia.4            | ZDB-GENE-030131-9279 | chia.4            |
| ENSDARG000000101181 | 47.7050235  | -0.699631743 | 0.183164305 | -3.819694798 | 0.000133617 | 0.004773809 | s100w             | ZDB-GENE-080407-2    | s100w             |
| ENSDARG00000042469  | 117.2703598 | -0.581631538 | 0.152334136 | -3.818130009 | 0.000134467 | 0.004795915 | ndufa12           | ZDB-GENE-050828-1    | ndufa12           |
| ENSDARG00000058346  | 6.189132469 | -1.695934744 | 0.444451784 | -3.815790157 | 0.000135748 | 0.004833276 | sass6             | ZDB-GENE-040426-2784 | sass6             |
| ENSDARG00000036456  | 766.2493926 | 0.469494849  | 0.123068047 | 3.814920781  | 0.000136227 | 0.004842004 | anxa4             | ZDB-GENE-030707-1    | anxa4             |
| ENSDARG00000038812  | 2.819066884 | -2.61781889  | 0.686408384 | -3.813792127 | 0.000136851 | 0.004855853 | e2f5              | ZDB-GENE-030828-3    | e2f5              |
| ENSDARG00000024195  | 87.22804959 | 0.648011673  | 0.169935376 | 3.813282955  | 0.000137133 | 0.004857554 | znf395b           | ZDB-GENE-041001-193  | znf395b           |
| ENSDARG00000035333  | 4.686641853 | -1.512918657 | 0.397448295 | -3.806579813 | 0.000140902 | 0.004975699 | mis18a            | ZDB-GENE-091204-314  | mis18a            |
| ENSDARG00000052779  | 20.95896098 | -2.250495508 | 0.591224694 | -3.806497815 | 0.000140949 | 0.004975699 | zgc:153932        | ZDB-GENE-070209-223  | zgc:153932        |
| ENSDARG00000012574  | 69.56197194 | 0.583392198  | 0.153388281 | 3.803368786  | 0.000142742 | 0.005022038 | slkb              | ZDB-GENE-030131-1684 | slkb              |
| ENSDARG00000076856  | 31.64781698 | -0.739136376 | 0.194337667 | -3.803361374 | 0.000142746 | 0.005022038 | frem2a            | ZDB-GENE-081119-3    | frem2a            |
| ENSDARG00000073756  | 126.9880511 | 0.502469131  | 0.132312956 | 3.797580716  | 0.000146115 | 0.005131863 | slc12a7a          | ZDB-GENE-070912-696  | slc12a7a          |
| ENSDARG00000093237  | 7.954390689 | -2.212801852 | 0.583245497 | -3.793945884 | 0.000148272 | 0.005195875 | si:ch211-89o9.4   | ZDB-GENE-090313-134  | si:ch211-89o9.4   |
| ENSDARG00000077911  | 53.81167914 | 1.01471317   | 0.267475612 | 3.793666136  | 0.000148439 | 0.005195875 | treh              | ZDB-GENE-070912-84   | treh              |
| ENSDARG00000070430  | 2.245068794 | -2.408176085 | 0.634892343 | -3.793046353 | 0.00014881  | 0.005200082 | chtobp            | ZDB-GENE-061013-712  | chtobp            |
| ENSDARG00000007836  | 644.5799523 | -0.456253425 | 0.120333562 | -3.791572499 | 0.000149696 | 0.005222238 | ctsla             | ZDB-GENE-030131-106  | ctsla             |
| ENSDARG000000101170 | 9.604498278 | -1.073041334 | 0.283061452 | -3.790842324 | 0.000150137 | 0.005228814 | rab42b            | ZDB-GENE-050417-172  | rab42b            |

|                    |             |              |             |              |             |             |                   |                      |                   |
|--------------------|-------------|--------------|-------------|--------------|-------------|-------------|-------------------|----------------------|-------------------|
| ENSDARG00000040874 | 408.5400312 | 0.305751007  | 0.080697732 | 3.788842619  | 0.000151351 | 0.005262232 | add3a             | ZDB-GENE-030131-2721 | add3a             |
| ENSDARG00000077004 | 2479.108857 | 0.713298234  | 0.188628017 | 3.78150736   | 0.000155882 | 0.005410685 | aldh11            | ZDB-GENE-100519-4    | aldh11            |
| ENSDARG00000024904 | 11.46726433 | -1.648243691 | 0.43619361  | -3.778697467 | 0.000157651 | 0.005462943 | stil              | ZDB-GENE-020419-39   | stil              |
| ENSDARG00000041306 | 59.24416927 | -0.591198449 | 0.156509731 | -3.777390994 | 0.00015848  | 0.005477109 | mrps25            | ZDB-GENE-050417-52   | mrps25            |
| ENSDARG00000078691 | 182.0826732 | 0.413297683  | 0.109418465 | 3.777220619  | 0.000158588 | 0.005477109 | gigyf1b           | ZDB-GENE-091204-310  | gigyf1b           |
| ENSDARG00000035028 | 17.26097256 | -1.434927838 | 0.380171109 | -3.774426317 | 0.000160376 | 0.005529647 | lpcat4            | ZDB-GENE-030131-5777 | lpcat4            |
| ENSDARG00000102375 | 14.64053106 | -1.704001209 | 0.451626951 | -3.773028172 | 0.000161278 | 0.005551502 | si:ch211-204c21.1 | ZDB-GENE-030429-35   | si:ch211-204c21.1 |
| ENSDARG00000061165 | 37.3485963  | 0.857439905  | 0.227308358 | 3.7721442    | 0.000161851 | 0.005561973 | slc6a4a           | ZDB-GENE-060314-1    | slc6a4a           |
| ENSDARG00000036628 | 344.1066414 | 0.578408442  | 0.153375732 | 3.771186182  | 0.000162473 | 0.005574129 | cd74b             | ZDB-GENE-990910-10   | cd74b             |
| ENSDARG00000029695 | 65.0091519  | -1.044690415 | 0.277129639 | -3.769681293 | 0.000163456 | 0.005598575 | pgp               | ZDB-GENE-030131-6240 | pgp               |
| ENSDARG00000052348 | 155.9752328 | -0.634809019 | 0.168564932 | -3.765961358 | 0.000165909 | 0.005673227 | smarca5           | ZDB-GENE-021125-1    | smarca5           |
| ENSDARG00000102883 | 1673.831892 | 0.286519608  | 0.076095193 | 3.765278687  | 0.000166363 | 0.005679379 | sptbn1            | ZDB-GENE-031006-3    | sptbn1            |
| ENSDARG00000053558 | 6.451465959 | -2.147508651 | 0.571358092 | -3.758603718 | 0.000170864 | 0.005823434 | rtkn2a            | ZDB-GENE-041010-225  | rtkn2a            |
| ENSDARG00000028976 | 12.59791764 | -1.182024485 | 0.314678087 | -3.756297418 | 0.000172446 | 0.005861148 | pus3              | ZDB-GENE-030131-9433 | pus3              |
| ENSDARG00000041691 | 496.9717298 | 0.429271203  | 0.114284414 | 3.756165758  | 0.000172536 | 0.005861148 | bhlhe41           | ZDB-GENE-050419-146  | bhlhe41           |
| ENSDARG00000038429 | 130.2648377 | -0.600208056 | 0.160020918 | -3.750809976 | 0.000176264 | 0.005977983 | csnrp1b           | ZDB-GENE-030131-1515 | csnrp1b           |
| ENSDARG00000035285 | 615.261341  | 0.374352151  | 0.09985468  | 3.748969526  | 0.000177563 | 0.006012179 | ncor1             | ZDB-GENE-040426-993  | ncor1             |
| ENSDARG00000026137 | 73.78030629 | -0.535054143 | 0.142761921 | -3.74787715  | 0.000178338 | 0.006028566 | sfxn5b            | ZDB-GENE-050706-107  | sfxn5b            |
| ENSDARG00000102138 | 33.86003672 | 0.783166821  | 0.209027342 | 3.746719509  | 0.000179162 | 0.006046579 | foxa1             | ZDB-GENE-990415-78   | foxa1             |
| ENSDARG00000016494 | 219.9645378 | -0.659321316 | 0.176067025 | -3.744717755 | 0.000180597 | 0.00608508  | ddc               | ZDB-GENE-040426-2656 | ddc               |
| ENSDARG00000063435 | 84.29200412 | -0.589525744 | 0.157618995 | -3.740194791 | 0.000183878 | 0.006185574 | trpm4b.2          | ZDB-GENE-061214-2    | trpm4b.2          |
| ENSDARG00000040725 | 14.29354158 | -1.254508816 | 0.335803348 | -3.735843684 | 0.000187087 | 0.006274914 | zgc:114130        | ZDB-GENE-050913-48   | zgc:114130        |
| ENSDARG00000105151 | 34.32982946 | 1.271013134  | 0.340227576 | 3.735773417  | 0.000187139 | 0.006274914 | cyp2k21           | ZDB-GENE-091113-17   | cyp2k21           |
| ENSDARG00000004218 | 33.86757041 | 0.750957705  | 0.201111195 | 3.73402827   | 0.000188441 | 0.00630837  | rnd1b             | ZDB-GENE-060315-7    | rnd1b             |
| ENSDARG00000104114 | 16.25111754 | -1.322616282 | 0.354298989 | -3.733051244 | 0.000189174 | 0.006322686 | kmt5ab            | ZDB-GENE-071004-17   | kmt5ab            |
| ENSDARG00000092115 | 727.2880502 | -0.644916798 | 0.1728308   | -3.731492285 | 0.000190349 | 0.006351705 | eif4a1a           | ZDB-GENE-031030-2    | eif4a1a           |
| ENSDARG00000029018 | 224.3746486 | 0.464319985  | 0.124476252 | 3.730189299  | 0.000191336 | 0.006357745 | cdkn1ba           | ZDB-GENE-040812-3    | cdkn1ba           |
| ENSDARG00000098171 | 57.29129459 | -0.728721648 | 0.19536029  | -3.730142132 | 0.000191372 | 0.006357745 | zgc:162193        | ZDB-GENE-030131-2035 | zgc:162193        |
| ENSDARG00000006422 | 50.23818782 | -0.656858027 | 0.176099516 | -3.730038789 | 0.00019145  | 0.006357745 | esyt3             | ZDB-GENE-050809-35   | esyt3             |
| ENSDARG00000087330 | 33.02536412 | -0.634687191 | 0.170237326 | -3.728249301 | 0.000192815 | 0.006392806 | maza              | ZDB-GENE-110603-4    | maza              |
| ENSDARG00000027355 | 2505.201806 | -0.476820782 | 0.127970958 | -3.726007753 | 0.000194536 | 0.006439591 | slc25a4           | ZDB-GENE-030131-5275 | slc25a4           |
| ENSDARG00000089904 | 32.40209703 | 0.767930287  | 0.206316727 | 3.722094175  | 0.000197577 | 0.00652982  | adgre5b.3         | ZDB-GENE-121214-275  | adgre5b.3         |
| ENSDARG00000039399 | 142.96041   | -0.390524943 | 0.104967587 | -3.72043364  | 0.000198881 | 0.006562439 | nt5c2a            | ZDB-GENE-030131-3566 | nt5c2a            |
| ENSDARG00000043168 | 774.8796432 | 0.90503745   | 0.243550248 | 3.716019411  | 0.000202386 | 0.006667478 | CELA1 (1 of many) | ZDB-GENE-040801-186  | zgc:92511         |
| ENSDARG00000092488 | 116.7360718 | 0.522856482  | 0.140839685 | 3.712422967  | 0.000205285 | 0.006752233 | khyn              | ZDB-GENE-141215-64   | khyn              |
| ENSDARG00000058574 | 44.42284094 | -0.500057136 | 0.134747563 | -3.711066261 | 0.000206388 | 0.00677182  | abcg2c            | ZDB-GENE-050517-37   | abcg2c            |
| ENSDARG00000068572 | 210.5284167 | -0.412859335 | 0.111256217 | -3.71088777  | 0.000206534 | 0.00677182  | slc16a1b          | ZDB-GENE-030515-5    | slc16a1b          |
| ENSDARG00000098680 | 171.6462741 | 0.413796988  | 0.111562633 | 3.70910022   | 0.000207997 | 0.006804107 | si:zfos-2326c3.2  | ZDB-GENE-091113-25   | si:zfos-2326c3.2  |
| ENSDARG00000087032 | 34.51488218 | 0.636351422  | 0.171579261 | 3.708789842  | 0.000208252 | 0.006804107 | rbbp8l            | ZDB-GENE-030131-3078 | rbbp8l            |
| ENSDARG00000005462 | 50.31704727 | -1.008140028 | 0.271872403 | -3.708136671 | 0.00020879  | 0.006804107 | kif4              | ZDB-GENE-040426-1545 | kif4              |
| ENSDARG00000040249 | 3.982860806 | -2.065522349 | 0.55703195  | -3.708085954 | 0.000208832 | 0.006804107 | tlr18             | ZDB-GENE-040220-2    | tlr18             |
| ENSDARG00000056515 | 39.80929773 | -0.998245553 | 0.269422935 | -3.705124635 | 0.000211287 | 0.006855408 | spsb1             | ZDB-GENE-030131-6122 | spsb1             |
| ENSDARG00000098583 | 35.16280931 | 0.629949809  | 0.170024541 | 3.705052246  | 0.000211347 | 0.006855408 | wbp1              | ZDB-GENE-040426-1830 | wbp1              |
| ENSDARG00000042527 | 8.315462084 | -1.164877906 | 0.314407813 | -3.704990326 | 0.000211399 | 0.006855408 | unga              | ZDB-GENE-040426-900  | unga              |
| ENSDARG00000053620 | 251.3247889 | -0.685733544 | 0.185314965 | -3.700367884 | 0.000215287 | 0.006970594 | ebi3              | ZDB-GENE-070912-615  | ebi3              |
| ENSDARG00000087187 | 5.23822879  | -1.900254863 | 0.513598972 | -3.69988058  | 0.000215701 | 0.006973097 | grip2a            | ZDB-GENE-081104-132  | grip2a            |

|                    |             |              |             |              |             |             |                   |                      |                   |
|--------------------|-------------|--------------|-------------|--------------|-------------|-------------|-------------------|----------------------|-------------------|
| ENSDARG00000074201 | 1326.994354 | -0.38070814  | 0.102993989 | -3.696411263 | 0.000218669 | 0.007058024 | flna              | ZDB-GENE-030131-2145 | flna              |
| ENSDARG00000078619 | 539.8285291 | -1.005564143 | 0.272209081 | -3.694087418 | 0.000220678 | 0.007111799 | pnp5a             | ZDB-GENE-040426-2553 | pnp5a             |
| ENSDARG00000077760 | 30.5123289  | -0.997935128 | 0.270338218 | -3.691431916 | 0.000222995 | 0.007175317 | asccl1            | ZDB-GENE-050417-80   | asccl1            |
| ENSDARG00000037533 | 1384.189644 | 0.874007937  | 0.236861722 | 3.689950116  | 0.000224298 | 0.007203005 | mep1b             | ZDB-GENE-041014-209  | mep1b             |
| ENSDARG00000071450 | 3.622310297 | -2.289830127 | 0.62060959  | -3.689646701 | 0.000224566 | 0.007203005 | tdrd5             | ZDB-GENE-050208-502  | tdrd5             |
| ENSDARG00000070844 | 4344.925202 | -0.604938919 | 0.163972523 | -3.689270065 | 0.000224898 | 0.007203005 | gamt              | ZDB-GENE-051030-97   | gamt              |
| ENSDARG00000014565 | 1.722905832 | -3.695998417 | 1.002176921 | -3.687969997 | 0.00022605  | 0.00721547  | eif4e1b           | ZDB-GENE-980526-127  | eif4e1b           |
| ENSDARG00000037739 | 29.55971053 | -0.972972327 | 0.263832761 | -3.687837411 | 0.000226168 | 0.00721547  | zgc:112980        | ZDB-GENE-050306-1    | zgc:112980        |
| ENSDARG00000014488 | 160.11176   | -0.557460744 | 0.151169531 | -3.687652802 | 0.000226332 | 0.00721547  | ca2               | ZDB-GENE-031219-5    | ca2               |
| ENSDARG00000014943 | 37.57423737 | -1.032403144 | 0.280121212 | -3.685558615 | 0.000228202 | 0.00726389  | kif23             | ZDB-GENE-991019-4    | kif23             |
| ENSDARG00000076228 | 27.48162047 | -0.996592599 | 0.270504937 | -3.684193759 | 0.000229428 | 0.007291718 | kif2c             | ZDB-GENE-070912-298  | kif2c             |
| ENSDARG00000061923 | 183.8806671 | 0.462511959  | 0.125632293 | 3.681473516  | 0.00023189  | 0.007358686 | amotl2a           | ZDB-GENE-030131-9770 | amotl2a           |
| ENSDARG00000037873 | 473.6206586 | 1.368701751  | 0.371883073 | 3.680462629  | 0.000232811 | 0.007376626 | cyp3c3            | ZDB-GENE-041114-102  | cyp3c3            |
| ENSDARG00000098747 | 102.9550267 | 1.102590438  | 0.299618844 | 3.679976946  | 0.000233255 | 0.007379406 | MYH6 (1 of many)  |                      |                   |
| ENSDARG00000102241 | 23.37968076 | -4.290324694 | 1.166178023 | -3.678962054 | 0.000234185 | 0.007397536 | zgc:136410        | ZDB-GENE-060421-6071 | zgc:136410        |
| ENSDARG00000009161 | 7.344155391 | 1.138538886  | 0.309711304 | 3.676129574  | 0.000236799 | 0.007468729 | fr55              | ZDB-GENE-070424-161  | fr55              |
| ENSDARG00000055338 | 20.38545664 | 0.846219644  | 0.23024294  | 3.675333731  | 0.000237539 | 0.007480664 | si:dkeyp-50d11.2  | ZDB-GENE-091113-22   | si:dkeyp-50d11.2  |
| ENSDARG00000028896 | 51.59861314 | 0.508092047  | 0.138304347 | 3.673724347  | 0.000239041 | 0.00751625  | plpp2b            | ZDB-GENE-030131-7425 | plpp2b            |
| ENSDARG00000043442 | 9.672388671 | -1.765240408 | 0.480553686 | -3.67334693  | 0.000239394 | 0.00751625  | zgc:153665        | ZDB-GENE-061027-365  | zgc:153665        |
| ENSDARG00000015472 | 215.3936684 | 0.303804595  | 0.802740839 | 3.671761137  | 0.000240885 | 0.00755161  | gpc4              | ZDB-GENE-011119-1    | gpc4              |
| ENSDARG00000024631 | 26.98336319 | 1.106128331  | 0.301368126 | 3.670356067  | 0.000242213 | 0.007581774 | nlrc5             | ZDB-GENE-080429-2    | nlrc5             |
| ENSDARG00000011262 | 5.579288125 | -1.428932685 | 0.389566102 | -3.668010844 | 0.000244445 | 0.007640099 | traip             | ZDB-GENE-040801-30   | traip             |
| ENSDARG00000075422 | 34.32316533 | -0.626511577 | 0.170860689 | -3.666797663 | 0.000245607 | 0.007664861 | MRPL49            |                      |                   |
| ENSDARG00000061468 | 31.74706616 | -0.994843193 | 0.271487996 | -3.664409499 | 0.00024791  | 0.007725095 | ncaph             | ZDB-GENE-070112-652  | ncaph             |
| ENSDARG00000101014 | 12.36585207 | -1.203502984 | 0.328657873 | -3.661871757 | 0.000250379 | 0.007790327 | slco1f4           | ZDB-GENE-070112-2172 | slco1f4           |
| ENSDARG00000100236 | 5.357761148 | -1.378286714 | 0.376465263 | -3.661125867 | 0.000251109 | 0.007801331 | cspp1a            | ZDB-GENE-120709-73   | cspp1a            |
| ENSDARG00000079241 | 9.123095778 | -1.136133001 | 0.310435937 | -3.659798583 | 0.000252414 | 0.007822457 | wdr90             | ZDB-GENE-070424-67   | wdr90             |
| ENSDARG00000036442 | 234.1821003 | 0.426159583  | 0.116450348 | 3.659581865  | 0.000252627 | 0.007822457 | atp11c            | ZDB-GENE-030616-51   | atp11c            |
| ENSDARG00000069292 | 52.13975525 | -0.958576337 | 0.261957414 | -3.659283094 | 0.000252922 | 0.007822457 | acot16            | ZDB-GENE-041210-201  | acot16            |
| ENSDARG00000076381 | 306.7560263 | -0.490547163 | 0.13417016  | -3.656156941 | 0.000256025 | 0.007906621 | slc25a1b          | ZDB-GENE-130114-1    | slc25a1b          |
| ENSDARG00000019765 | 138.7657269 | 0.47987525   | 0.131395968 | 3.652130718  | 0.000260073 | 0.008002777 | zgc:158803        | ZDB-GENE-070424-15   | zgc:158803        |
| ENSDARG00000058800 | 11.12724757 | -1.100266386 | 0.301287048 | -3.651887434 | 0.00026032  | 0.008002777 | rab25a            | ZDB-GENE-041212-69   | rab25a            |
| ENSDARG00000075045 | 37.09115385 | 1.050430616  | 0.287661894 | 3.651615452  | 0.000260596 | 0.008002777 | cxcl18b           | ZDB-GENE-090313-165  | cxcl18b           |
| ENSDARG00000008022 | 11.09085828 | -1.143040836 | 0.313030692 | -3.651529597 | 0.000260683 | 0.008002777 | kif18a            | ZDB-GENE-040426-862  | kif18a            |
| ENSDARG00000052617 | 17.99316974 | -0.954861191 | 0.261599525 | -3.650087639 | 0.000262151 | 0.008035932 | raver1            | ZDB-GENE-050522-99   | raver1            |
| ENSDARG00000014915 | 112.7444322 | -0.595831332 | 0.163254987 | -3.649697598 | 0.000262549 | 0.008036255 | ndufab1b          | ZDB-GENE-030131-4437 | ndufab1b          |
| ENSDARG00000086484 | 1.03444408  | -4.055250077 | 1.112347939 | -3.645666914 | 0.000266699 | 0.008151241 | fbxw10            | ZDB-GENE-101021-1    | fbxw10            |
| ENSDARG00000021794 | 28.70280498 | -0.956694971 | 0.262987937 | -3.637790321 | 0.000274987 | 0.008384073 | hmmr              | ZDB-GENE-030131-731  | hmmr              |
| ENSDARG00000069192 | 7.380566364 | -1.858946363 | 0.511028088 | -3.637659863 | 0.000275126 | 0.008384073 | zgc:163030        | ZDB-GENE-060810-77   | zgc:163030        |
| ENSDARG00000102624 | 41.07288178 | -0.765321805 | 0.210410549 | -3.63727869  | 0.000275534 | 0.008384156 | kif22             | ZDB-GENE-080204-34   | kif22             |
| ENSDARG00000038667 | 160.7349596 | 0.573382888  | 0.157873995 | 3.631902075  | 0.00028134  | 0.008548277 | fggy              | ZDB-GENE-040426-2461 | fggy              |
| ENSDARG00000099865 | 453.9356124 | -0.536146942 | 0.147648728 | -3.63123306  | 0.00028207  | 0.008550016 | hnrnpabb          | ZDB-GENE-040426-2516 | hnrnpabb          |
| ENSDARG00000058159 | 80.98603244 | 0.622115572  | 0.171330063 | 3.631094043  | 0.000282222 | 0.008550016 | ipo8              | ZDB-GENE-060503-3    | ipo8              |
| ENSDARG00000057719 | 160.2508839 | -0.420256375 | 0.115798914 | -3.629190983 | 0.000284311 | 0.008600714 | at12              | ZDB-GENE-030131-6505 | at12              |
| ENSDARG00000090969 | 3.62034225  | 2.557117866  | 0.704810896 | 3.628090711  | 0.000285525 | 0.008624851 | cbn18             | ZDB-GENE-111109-3    | cbn18             |
| ENSDARG00000029170 | 499.3484158 | -0.266634564 | 0.073527749 | -3.626312063 | 0.000287498 | 0.008671807 | si:ch211-200p22.4 | ZDB-GENE-081104-61   | si:ch211-200p22.4 |

|                    |             |              |             |              |             |             |                    |                      |                    |
|--------------------|-------------|--------------|-------------|--------------|-------------|-------------|--------------------|----------------------|--------------------|
| ENSDARG00000055656 | 139.6033176 | -0.725687306 | 0.2002592   | -3.62374016  | 0.000290373 | 0.008742934 | pdzd3b             | ZDB-GENE-081022-151  | pdzd3b             |
| ENSDARG00000017917 | 1.515517599 | -4.373452052 | 1.206985742 | -3.62344964  | 0.0002907   | 0.008742934 | her7               | ZDB-GENE-000427-6    | her7               |
| ENSDARG00000063167 | 125.4816785 | -0.581105254 | 0.160412643 | -3.622565169 | 0.000291696 | 0.008760179 | chkb               | ZDB-GENE-030131-2928 | chkb               |
| ENSDARG00000075725 | 17.50343518 | -1.144806358 | 0.316176541 | -3.620782091 | 0.000293714 | 0.008799811 | cep152             | ZDB-GENE-111005-1    | cep152             |
| ENSDARG00000075008 | 7.290309911 | -1.467328562 | 0.405266722 | -3.620649021 | 0.000293865 | 0.008799811 | pask               | ZDB-GENE-030131-1394 | pask               |
| ENSDARG00000078167 | 91.76903819 | 0.572603345  | 0.158183198 | 3.619874631  | 0.000294746 | 0.008813452 | si:dkeyp-100h4.1   | ZDB-GENE-081103-7    | si:dkeyp-100h4.1   |
| ENSDARG00000108535 | 253.628981  | -0.564299687 | 0.1559736   | -3.617917938 | 0.000296983 | 0.008860252 | CABZ01072077.1     |                      |                    |
| ENSDARG00000039116 | 327.6657466 | 0.770000586  | 0.212848637 | 3.617596984  | 0.000297351 | 0.008860252 | nr5a5              | ZDB-GENE-030131-4652 | nr5a5              |
| ENSDARG00000086017 | 0.90694839  | -4.063380074 | 1.123291895 | -3.617385732 | 0.000297594 | 0.008860252 | zgc:153681         | ZDB-GENE-060825-299  | zgc:153681         |
| ENSDARG00000070826 | 24.76807287 | -0.684369131 | 0.189225916 | -3.616677604 | 0.000298409 | 0.008868183 | bpgm               | ZDB-GENE-040718-375  | bpgm               |
| ENSDARG00000005356 | 30.12446967 | -0.665562395 | 0.184039479 | -3.616411001 | 0.000298716 | 0.008868183 | tyro3              | ZDB-GENE-990714-13   | tyro3              |
| ENSDARG00000099612 | 1.186596521 | -4.589722638 | 1.27025619  | -3.613225956 | 0.000302411 | 0.008965035 | zgc:66483          | ZDB-GENE-030131-5765 | zgc:66483          |
| ENSDARG00000038066 | 73.62224331 | -0.907685858 | 0.251287371 | -3.612142761 | 0.000303677 | 0.008989716 | kpna2              | ZDB-GENE-040718-22   | kpna2              |
| ENSDARG00000100185 | 5.440194487 | -2.44398721  | 0.677029164 | -3.609869915 | 0.000306351 | 0.009055916 | elovl7b            | ZDB-GENE-030131-5485 | elovl7b            |
| ENSDARG00000025275 | 3.293616513 | -2.197249595 | 0.608968598 | -3.608149258 | 0.000308389 | 0.009103188 | gbgt11l            | ZDB-GENE-040426-1117 | gbgt11l            |
| ENSDARG00000012892 | 70.45690578 | -0.460459366 | 0.127632566 | -3.607694981 | 0.000308929 | 0.009106165 | ammecr1            | ZDB-GENE-040426-1533 | ammecr1            |
| ENSDARG00000042722 | 43.58722104 | 0.50563328   | 0.140207757 | 3.6063146    | 0.000310577 | 0.009141716 | blnk               | ZDB-GENE-040702-4    | blnk               |
| ENSDARG00000054334 | 12.43472572 | -1.186606345 | 0.329082837 | -3.605798333 | 0.000311195 | 0.009146918 | dctpp1             | ZDB-GENE-040426-1741 | dctpp1             |
| ENSDARG00000009087 | 810.3090398 | 0.544567953  | 0.15106321  | 3.604901245  | 0.000312272 | 0.009158404 | cd74a              | ZDB-GENE-000901-1    | cd74a              |
| ENSDARG00000074712 | 18.79660216 | 2.281068918  | 0.632797635 | 3.604736793  | 0.000312469 | 0.009158404 | si:ch211-186e20.2  | ZDB-GENE-110407-8    | si:ch211-186e20.2  |
| ENSDARG00000080010 | 603.8974184 | 0.382740644  | 0.10620808  | 3.603686698  | 0.000313735 | 0.009182515 | adh5               | ZDB-GENE-011003-1    | adh5               |
| ENSDARG00000037870 | 18468.92326 | 0.461384999  | 0.128108102 | 3.601528642  | 0.000316352 | 0.009246033 | actb2              | ZDB-GENE-000329-3    | actb2              |
| ENSDARG00000006837 | 35.2380218  | 0.738366832  | 0.205095265 | 3.600116418  | 0.000318075 | 0.009266628 | mycn               | ZDB-GENE-020711-1    | mycn               |
| ENSDARG00000002523 | 376.2559454 | -0.365582923 | 0.101563157 | -3.599562418 | 0.000318753 | 0.009266628 | hsdl2              | ZDB-GENE-030131-1066 | hsdl2              |
| ENSDARG00000060917 | 69.62985944 | -0.701397268 | 0.194872629 | -3.599260051 | 0.000319124 | 0.009266628 | anln               | ZDB-GENE-030131-4486 | anln               |
| ENSDARG00000004906 | 269.5700379 | -0.402661199 | 0.111880219 | -3.599038361 | 0.000319396 | 0.009266628 | stip1              | ZDB-GENE-041121-17   | stip1              |
| ENSDARG00000099144 | 148.499634  | 0.361193839  | 0.100370664 | 3.598599684  | 0.000319935 | 0.009266628 | igfbp3             | ZDB-GENE-040412-1    | igfbp3             |
| ENSDARG00000089805 | 34.82053082 | 0.622860564  | 0.173084608 | 3.598590135  | 0.000319947 | 0.009266628 | pcdh18a            | ZDB-GENE-000607-1    | pcdh18a            |
| ENSDARG00000075491 | 24.75439536 | -0.892495141 | 0.248025866 | -3.598395432 | 0.000320187 | 0.009266628 | si:ch211-26b3.4    | ZDB-GENE-081104-60   | si:ch211-26b3.4    |
| ENSDARG00000077155 | 14.38022198 | 1.050586662  | 0.292025698 | 3.597582917  | 0.000321188 | 0.00928265  | si:ch211-157p22.10 | ZDB-GENE-060526-53   | si:ch211-157p22.10 |
| ENSDARG00000104924 | 7.891083289 | 1.655660971  | 0.460346382 | 3.596554757  | 0.00032246  | 0.00929758  | BX072577.1         |                      |                    |
| ENSDARG00000070656 | 41.93527723 | -0.968572479 | 0.269318218 | -3.596386782 | 0.000322668 | 0.00929758  | si:ch211-69g19.2   | ZDB-GENE-030804-13   | si:ch211-69g19.2   |
| ENSDARG00000061858 | 792.9546191 | -0.785371887 | 0.218396778 | -3.596078176 | 0.000323051 | 0.00929758  | zgc:153968         | ZDB-GENE-061027-211  | zgc:153968         |
| ENSDARG00000058459 | 155.0411934 | 0.458816192  | 0.127688628 | 3.593242412  | 0.000326588 | 0.009386362 | plekhg2            | ZDB-GENE-090819-1    | plekhg2            |
| ENSDARG00000058725 | 9.354173695 | 2.990774615  | 0.83255563  | 3.592282016  | 0.000327795 | 0.009407984 | rfesd              | ZDB-GENE-050417-254  | rfesd              |
| ENSDARG00000005274 | 6.59554793  | -1.40161799  | 0.39091915  | -3.585442134 | 0.000336508 | 0.00964469  | rad52              | ZDB-GENE-050731-10   | rad52              |
| ENSDARG00000012833 | 42.49523451 | -0.797621651 | 0.22255317  | -3.583925393 | 0.000338469 | 0.009687501 | foxn3              | ZDB-GENE-060512-39   | foxn3              |
| ENSDARG00000099195 | 36.66844666 | 0.902647533  | 0.251934712 | 3.582862902  | 0.000339849 | 0.009713587 | ier2a              | ZDB-GENE-030131-9126 | ier2a              |
| ENSDARG00000071009 | 21.36726493 | -0.970501995 | 0.27096663  | -3.581629197 | 0.000341458 | 0.009746139 | kif20ba            | ZDB-GENE-041111-213  | kif20ba            |
| ENSDARG00000074041 | 95.34305891 | 0.462976582  | 0.129340899 | 3.579506435  | 0.000344244 | 0.009812131 | abca5              | ZDB-GENE-050517-5    | abca5              |
| ENSDARG00000053961 | 42.8396183  | -0.816215607 | 0.228063476 | -3.578896632 | 0.000345048 | 0.009821542 | slc2a11a           | ZDB-GENE-080723-20   | slc2a11a           |
| ENSDARG00000077089 | 15.4036217  | -0.997254078 | 0.278871134 | -3.576039101 | 0.000348839 | 0.009915846 | blm                | ZDB-GENE-070702-5    | blm                |
| ENSDARG00000092281 | 67.47202939 | 0.561872495  | 0.15721793  | 3.573844894  | 0.000351777 | 0.009985658 | flnb               | ZDB-GENE-041026-1    | flnb               |
| ENSDARG00000099148 | 210.9530256 | -0.64608515  | 0.180800032 | -3.573479177 | 0.000352269 | 0.009985942 | bzw1b              | ZDB-GENE-040426-2881 | bzw1b              |
| ENSDARG00000007344 | 220.6744697 | -0.848305571 | 0.237438078 | -3.572744425 | 0.000353259 | 0.009990222 | tcap               | ZDB-GENE-070501-5    | tcap               |
| ENSDARG00000074163 | 3.299192559 | -2.49211289  | 0.697552689 | -3.572651828 | 0.000353384 | 0.009990222 | zgc:162879         | ZDB-GENE-070424-92   | zgc:162879         |



|                    |             |              |             |              |             |             |                   |                      |                   |
|--------------------|-------------|--------------|-------------|--------------|-------------|-------------|-------------------|----------------------|-------------------|
| ENSDARG00000054534 | 159.2820626 | 0.845159406  | 0.236661619 | 3.571172255  | 0.000355387 | 0.010033148 | ACOT12            |                      |                   |
| ENSDARG00000039887 | 230.7023477 | -0.367511535 | 0.10292879  | -3.570541668 | 0.000356244 | 0.010043651 | c1qbp             | ZDB-GENE-050417-408  | c1qbp             |
| ENSDARG00000061120 | 2356.158144 | -0.646058633 | 0.180963542 | -3.570103825 | 0.00035684  | 0.010046785 | slc43a2b          | ZDB-GENE-041212-6    | slc43a2b          |
| ENSDARG00000078297 | 48.75673985 | 0.798344091  | 0.22380574  | 3.567129646  | 0.000360913 | 0.010147677 | ptprh             | ZDB-GENE-091118-90   | ptprh             |
| ENSDARG00000020046 | 70.29603085 | -0.750192513 | 0.210477024 | -3.564248958 | 0.000364899 | 0.010238253 | ahr1a             | ZDB-GENE-020531-2    | ahr1a             |
| ENSDARG00000016783 | 163.9247999 | 0.332839347  | 0.093386944 | 3.56408866   | 0.000365123 | 0.010238253 | srsf6b            | ZDB-GENE-041219-1    | srsf6b            |
| ENSDARG00000011466 | 22.00208854 | -0.694343781 | 0.194956439 | -3.561532941 | 0.000368696 | 0.01032448  | afg1la            | ZDB-GENE-091006-2    | afg1la            |
| ENSDARG00000094265 | 21.24000331 | 0.902793619  | 0.253561024 | 3.560458962  | 0.000370207 | 0.010352423 | si:dkey-183n20.15 | ZDB-GENE-041001-160  | si:dkey-183n20.15 |
| ENSDARG00000090914 | 45.07926928 | 0.614306429  | 0.172552427 | 3.560114681  | 0.000370693 | 0.010352423 | si:ch211-117k10.3 | ZDB-GENE-141212-273  | si:ch211-117k10.3 |
| ENSDARG00000039677 | 365.3452885 | -0.520334321 | 0.146260849 | -3.557577595 | 0.000374291 | 0.010438828 | dsc2l             | ZDB-GENE-031116-55   | dsc2l             |
| ENSDARG00000022968 | 476.5426434 | 0.545905452  | 0.153467471 | 3.557141132  | 0.000374913 | 0.010442127 | fxr1              | ZDB-GENE-030131-5431 | fxr1              |
| ENSDARG00000077785 | 393.8819495 | 0.50698666   | 0.142541926 | 3.55675465   | 0.000375465 | 0.010443457 | atf5b             | ZDB-GENE-030131-2637 | atf5b             |
| ENSDARG00000016048 | 99.47624483 | -0.49154696  | 0.138320149 | -3.553690222 | 0.000379866 | 0.01055173  | gpat3             | ZDB-GENE-040718-436  | gpat3             |
| ENSDARG00000095540 | 1.859374561 | 3.139051967  | 0.883460365 | 3.553132761  | 0.000380672 | 0.010559551 | sid1              | ZDB-GENE-020620-1    | sid1              |
| ENSDARG00000011597 | 187.3964656 | -0.578499091 | 0.162829471 | -3.552791075 | 0.000381167 | 0.010559551 | atxn2l            | ZDB-GENE-030131-3246 | atxn2l            |
| ENSDARG00000044002 | 19.46802035 | 1.056612662  | 0.297508985 | 3.551531942  | 0.000382996 | 0.010583482 | cyp2x7            | ZDB-GENE-110114-2    | cyp2x7            |
| ENSDARG00000088972 | 83.15259419 | 0.636092082  | 0.17910555  | 3.551492864  | 0.000383052 | 0.010583482 | si:dkey-238d18.4  | ZDB-GENE-131121-307  | si:dkey-238d18.4  |
| ENSDARG00000105114 | 29.763764   | 0.930707561  | 0.262100308 | 3.550959438  | 0.00038383  | 0.010590834 | crebrf            | ZDB-GENE-120203-3    | crebrf            |
| ENSDARG00000094929 | 1565.678342 | -1.199420443 | 0.337871963 | -3.549925932 | 0.00038534  | 0.010604891 | apoa4b.2          | ZDB-GENE-030131-3143 | apoa4b.2          |
| ENSDARG00000062266 | 124.4377402 | -0.41400657  | 0.116624519 | -3.549910205 | 0.000385363 | 0.010604891 | edc4              | ZDB-GENE-030131-5032 | edc4              |
| ENSDARG00000062794 | 13.52284462 | -1.505461766 | 0.424134123 | -3.549494574 | 0.000385971 | 0.010607559 | trim36            | ZDB-GENE-040426-2936 | trim36            |
| ENSDARG00000045870 | 101.2993642 | 0.484720583  | 0.136785957 | 3.543642876  | 0.000394639 | 0.010831415 | plekha5           | ZDB-GENE-041210-25   | plekha5           |
| ENSDARG00000005690 | 45.60867783 | -0.771658612 | 0.217821191 | -3.542624147 | 0.000396167 | 0.010858956 | slc25a23a         | ZDB-GENE-121214-154  | slc25a23a         |
| ENSDARG00000101037 | 13.61555197 | -1.207526049 | 0.34095296  | -3.541620664 | 0.000397677 | 0.010885946 | asf1ba            | ZDB-GENE-031118-197  | asf1ba            |
| ENSDARG00000077540 | 20.1207012  | -1.046384699 | 0.29554758  | -3.540494894 | 0.000399377 | 0.010917186 | f2r1.2            | ZDB-GENE-070615-24   | f2r1.2            |
| ENSDARG00000063169 | 1.521015241 | -4.160847878 | 1.175324857 | -3.540168366 | 0.000399872 | 0.010917186 | ubn1              | ZDB-GENE-070928-28   | ubn1              |
| ENSDARG00000005619 | 11.15179541 | -1.466530518 | 0.414463896 | -3.538379417 | 0.000402591 | 0.010976965 | nek2              | ZDB-GENE-040426-752  | nek2              |
| ENSDARG00000041602 | 42.29408662 | -0.520042973 | 0.147007492 | -3.537526993 | 0.000403893 | 0.010997988 | zgc:92335         | ZDB-GENE-040718-152  | zgc:92335         |
| ENSDARG00000069065 | 26.48999436 | -0.814037491 | 0.230156974 | -3.53687953  | 0.000404884 | 0.011010515 | btg3              | ZDB-GENE-031113-19   | btg3              |
| ENSDARG00000091136 | 603.1109635 | 1.112077131  | 0.314931199 | 3.531174854  | 0.000413718 | 0.011236    | zgc:174259        | ZDB-GENE-080213-10   | zgc:174259        |
| ENSDARG00000074985 | 101.0480781 | -0.668288317 | 0.189308291 | -3.530158727 | 0.00041531  | 0.01126448  | aurkaip1          | ZDB-GENE-070928-24   | aurkaip1          |
| ENSDARG00000039351 | 84.27518266 | 1.45250644   | 0.411571465 | 3.529171878  | 0.000416862 | 0.011282179 | ccl19b            | ZDB-GENE-091204-19   | ccl19b            |
| ENSDARG00000059247 | 20.67436242 | -0.728875852 | 0.206536803 | -3.529036184 | 0.000417076 | 0.011282179 | tmem54a           | ZDB-GENE-040426-1304 | tmem54a           |
| ENSDARG00000017165 | 264.2338311 | 0.710173377  | 0.201256019 | 3.528706273  | 0.000417596 | 0.011282179 | slc3a1            | ZDB-GENE-090313-225  | slc3a1            |
| ENSDARG00000063509 | 166.7381863 | -0.984395359 | 0.279109092 | -3.526919711 | 0.000420424 | 0.01134379  | lrrc58b           | ZDB-GENE-050309-29   | lrrc58b           |
| ENSDARG00000074087 | 1.39973819  | -3.177386702 | 0.901179775 | -3.525807824 | 0.000422193 | 0.011376707 | nim1k             | ZDB-GENE-130530-744  | nim1k             |
| ENSDARG00000039066 | 2335.511513 | 0.763900424  | 0.216800121 | 3.523523982  | 0.000425849 | 0.011460304 | klhl31            | ZDB-GENE-030131-2052 | klhl31            |
| ENSDARG00000022845 | 81.19065348 | -0.409045298 | 0.116140146 | -3.521997442 | 0.000428308 | 0.011511549 | lias              | ZDB-GENE-040426-1528 | lias              |
| ENSDARG00000004187 | 4.014290053 | -2.097239675 | 0.595682708 | -3.520732846 | 0.000430356 | 0.011551601 | zgc:122979        | ZDB-GENE-051127-45   | zgc:122979        |
| ENSDARG00000040257 | 2.146428263 | -2.958926613 | 0.840558116 | -3.520192781 | 0.000431233 | 0.011560175 | slc38a11          | ZDB-GENE-050417-122  | slc38a11          |
| ENSDARG00000099425 | 404.0989585 | 0.610187741  | 0.173357571 | 3.51982171   | 0.000431837 | 0.011561403 | CAB201073265.1    |                      |                   |
| ENSDARG00000078733 | 134.6892607 | -0.702998133 | 0.199766985 | -3.519090663 | 0.000433029 | 0.011578349 | cnm2b             | ZDB-GENE-090311-26   | cnm2b             |
| ENSDARG00000089162 | 49.79408341 | 0.522473275  | 0.148486095 | 3.518668039  | 0.000433719 | 0.011581863 | afap1l1a          | ZDB-GENE-050913-76   | afap1l1a          |
| ENSDARG00000026723 | 207.6425915 | -0.460903731 | 0.13107988  | -3.516205016 | 0.000437763 | 0.011674802 | syncrpl           | ZDB-GENE-030131-3104 | syncrpl           |
| ENSDARG00000004473 | 17.41708141 | 1.042816472  | 0.296655129 | 3.515248416  | 0.000439343 | 0.011691951 | tbx21             | ZDB-GENE-080104-3    | tbx21             |
| ENSDARG00000017444 | 196.8881758 | 0.716351717  | 0.203790804 | 3.515132699  | 0.000439534 | 0.011691951 | hal               | ZDB-GENE-070410-5    | hal               |

|                    |             |              |             |              |             |             |                   |                      |                   |
|--------------------|-------------|--------------|-------------|--------------|-------------|-------------|-------------------|----------------------|-------------------|
| ENSDARG00000071353 | 385.5158487 | -0.687532286 | 0.195740831 | -3.512462285 | 0.000443975 | 0.011780225 | si:ch211-235e9.8  | ZDB-GENE-141219-2    | si:ch211-235e9.8  |
| ENSDARG00000079009 | 600.6429268 | -0.745470448 | 0.212254617 | -3.512151867 | 0.000444494 | 0.011780225 | abca1b            | ZDB-GENE-030131-9826 | abca1b            |
| ENSDARG00000017261 | 197.898468  | -0.658180438 | 0.18741237  | -3.511937004 | 0.000444853 | 0.011780225 | gdpd1             | ZDB-GENE-040822-22   | gdpd1             |
| ENSDARG00000016290 | 1333.734282 | 0.728160773  | 0.207348429 | 3.511773768  | 0.000445127 | 0.011780225 | clca1             | ZDB-GENE-030131-6221 | clca1             |
| ENSDARG00000055652 | 28.68375933 | -0.625564091 | 0.178346973 | -3.507567757 | 0.000452223 | 0.011952766 | aclyb             | ZDB-GENE-090909-2    | aclyb             |
| ENSDARG00000099819 | 616.3743753 | -0.612742087 | 0.17475405  | -3.506311218 | 0.000454364 | 0.011994042 | sb:cb1058         | ZDB-GENE-040108-9    | sb:cb1058         |
| ENSDARG00000077404 | 168.8811891 | 0.277852064  | 0.079319442 | 3.502950328  | 0.000460135 | 0.012122653 | ncoa3             | ZDB-GENE-051107-8    | ncoa3             |
| ENSDARG00000062096 | 179.9229733 | 0.411166626  | 0.117382481 | 3.502793792  | 0.000460406 | 0.012122653 | pm20d1.2          | ZDB-GENE-061013-637  | pm20d1.2          |
| ENSDARG00000069006 | 123.3066834 | 0.503809441  | 0.143852493 | 3.502264241  | 0.000461322 | 0.01213136  | tlf3b             | ZDB-GENE-990415-85   | tlf3b             |
| ENSDARG00000103176 | 1.985226834 | -2.65275252  | 0.757809735 | -3.500552222 | 0.000464295 | 0.012194077 | nr5a1a            | ZDB-GENE-010504-1    | nr5a1a            |
| ENSDARG00000102082 | 98.59800528 | 0.664289338  | 0.189929723 | 3.497553349  | 0.000469547 | 0.012316391 | nr3c2             | ZDB-GENE-060531-23   | nr3c2             |
| ENSDARG00000040266 | 4.658260534 | -2.186208181 | 0.625721792 | -3.493898104 | 0.000476023 | 0.01247047  | sox19b            | ZDB-GENE-010111-1    | sox19b            |
| ENSDARG00000035569 | 129.6478331 | 0.507814945  | 0.145381928 | 3.492971591  | 0.000477677 | 0.012498017 | cyp1d1            | ZDB-GENE-041114-179  | cyp1d1            |
| ENSDARG00000089071 | 27.15420299 | 0.851762702  | 0.243943089 | 3.491645152  | 0.000480056 | 0.012544402 | ushbp1            | ZDB-GENE-121024-2    | ushbp1            |
| ENSDARG00000032571 | 132.6613285 | 0.504663089  | 0.144841032 | 3.48425499   | 0.000493509 | 0.012869017 | il20ra            | ZDB-GENE-040724-249  | il20ra            |
| ENSDARG00000016477 | 195.7062845 | 0.523769911  | 0.150329731 | 3.48414055   | 0.00049372  | 0.012869017 | eif4a2            | ZDB-GENE-040426-2802 | eif4a2            |
| ENSDARG00000077764 | 71.61527115 | -0.511418681 | 0.146970806 | -3.479729709 | 0.00050192  | 0.013066311 | faah              | ZDB-GENE-070619-3    | faah              |
| ENSDARG00000074656 | 38.1249723  | -1.397576599 | 0.401687087 | -3.479266932 | 0.000502788 | 0.013072475 | ctss2.1           | ZDB-GENE-050522-559  | ctss2.1           |
| ENSDARG00000042956 | 51.03675768 | 0.895637784  | 0.25747375  | 3.478559598  | 0.000504116 | 0.01308958  | cyp2ad6           | ZDB-GENE-041001-157  | cyp2ad6           |
| ENSDARG00000044094 | 355.4338067 | 0.537126606  | 0.154426318 | 3.478206382  | 0.000504781 | 0.01308958  | gfpt2             | ZDB-GENE-071113-1    | gfpt2             |
| ENSDARG00000095410 | 26.57832988 | 1.001436639  | 0.287956858 | 3.477731517  | 0.000505676 | 0.01308958  | si:ch211-285c6.4  | ZDB-GENE-041001-97   | si:ch211-285c6.4  |
| ENSDARG00000038768 | 134.2940925 | -0.487833348 | 0.140279762 | -3.477574672 | 0.000505972 | 0.01308958  | mrpl12            | ZDB-GENE-050417-187  | mrpl12            |
| ENSDARG00000037393 | 86.66703996 | -0.567370741 | 0.163188273 | -3.476786222 | 0.000507462 | 0.013111762 | slc43a1a          | ZDB-GENE-030131-6327 | slc43a1a          |
| ENSDARG00000054539 | 187.2978953 | 0.38069049   | 0.109529866 | 3.475677492  | 0.000509565 | 0.013149688 | lrp10             | ZDB-GENE-140418-2    | lrp10             |
| ENSDARG00000077726 | 86.0476517  | -1.003007102 | 0.288785832 | -3.47318667  | 0.000514318 | 0.01325583  | nocta             | ZDB-GENE-050208-306  | nocta             |
| ENSDARG00000037550 | 2.519723682 | -2.805182408 | 0.808193325 | -3.470929937 | 0.000518659 | 0.013351128 | cyp21a2           | ZDB-GENE-070103-6    | cyp21a2           |
| ENSDARG00000052900 | 8.037847019 | 1.611562102  | 0.464674327 | 3.468153952  | 0.000524047 | 0.013473079 | zgc:153642        | ZDB-GENE-061013-527  | zgc:153642        |
| ENSDARG00000045442 | 28341.73881 | 0.71393428   | 0.205881934 | 3.467687847  | 0.000524957 | 0.013479743 | cpb1              | ZDB-GENE-030131-1132 | cpb1              |
| ENSDARG00000034982 | 40.77026931 | -0.561562648 | 0.162035402 | -3.465678751 | 0.000528895 | 0.013564057 | zcchc8            | ZDB-GENE-060526-6    | zcchc8            |
| ENSDARG00000014945 | 247.157125  | -0.43955031  | 0.126884288 | -3.464182337 | 0.000531846 | 0.01362288  | znf598            | ZDB-GENE-060602-3    | znf598            |
| ENSDARG00000031911 | 129.1279151 | 0.363119354  | 0.104888799 | 3.461945949  | 0.000536285 | 0.013719623 | tns3.2            | ZDB-GENE-081031-95   | tns3.2            |
| ENSDARG00000092931 | 103.4164754 | 0.764430648  | 0.220849579 | 3.461318117  | 0.000537537 | 0.013734705 | si:ch211-114c12.5 | ZDB-GENE-060526-13   | si:ch211-114c12.5 |
| ENSDARG00000031100 | 523.694031  | -0.356628593 | 0.103104854 | -3.458892373 | 0.000542402 | 0.013841928 | ivns1abpa         | ZDB-GENE-031222-2    | ivns1abpa         |
| ENSDARG00000100815 | 0.911180294 | -3.669244226 | 1.06114335  | -3.45782144  | 0.000544562 | 0.013879972 | srsf3a            | ZDB-GENE-030616-631  | srsf3a            |
| ENSDARG00000101205 | 33.68229932 | 0.633429506  | 0.183259142 | 3.4564688    | 0.000547303 | 0.013932683 | mbd1a             | ZDB-GENE-030131-4214 | mbd1a             |
| ENSDARG00000067851 | 57.08642536 | -0.686702424 | 0.19877681  | -3.454640529 | 0.000551027 | 0.014003861 | lcn15             | ZDB-GENE-060825-349  | lcn15             |
| ENSDARG00000057128 | 299.9498687 | -0.389385926 | 0.112720631 | -3.454433504 | 0.00055145  | 0.014003861 | hadhaa            | ZDB-GENE-031222-5    | hadhaa            |
| ENSDARG00000007959 | 170.9282006 | -0.454889574 | 0.131718059 | -3.45350954  | 0.000553343 | 0.014017682 | hibadhb           | ZDB-GENE-040426-1582 | hibadhb           |
| ENSDARG00000018542 | 4.385820049 | -1.624349196 | 0.470371921 | -3.453329429 | 0.000553712 | 0.014017682 | hapln4            | ZDB-GENE-060503-243  | hapln4            |
| ENSDARG00000032849 | 413.995171  | 0.437076877  | 0.126572365 | 3.453177753  | 0.000554024 | 0.014017682 | ndrg1a            | ZDB-GENE-030826-34   | ndrg1a            |
| ENSDARG00000029689 | 6.879815536 | 1.59891862   | 0.46308033  | 3.452788894  | 0.000554823 | 0.014020784 | tkta              | ZDB-GENE-130530-578  | tkta              |
| ENSDARG00000077180 | 50.70277329 | -0.699138873 | 0.202515121 | -3.452279858 | 0.000555871 | 0.014030153 | slc37a4b          | ZDB-GENE-040426-827  | slc37a4b          |
| ENSDARG00000077068 | 715.1702294 | 0.679154295  | 0.196773574 | 3.451450731  | 0.000557582 | 0.01405621  | si:ch211-11p18.6  | ZDB-GENE-070912-24   | si:ch211-11p18.6  |
| ENSDARG00000100607 | 21.49807347 | 0.689354034  | 0.199853606 | 3.449294958  | 0.000562052 | 0.014151701 | zbtb38            | ZDB-GENE-091204-308  | zbtb38            |
| ENSDARG00000091222 | 81.60247179 | -0.585604527 | 0.169812488 | -3.448536287 | 0.000563634 | 0.014174294 | si:dkey-190l8.2   | ZDB-GENE-030131-9103 | si:dkey-190l8.2   |
| ENSDARG00000104541 | 90.54041651 | -0.517601044 | 0.15015716  | -3.447062031 | 0.000566718 | 0.014234594 | msh6              | ZDB-GENE-020905-3    | msh6              |

|                     |             |              |             |              |             |             |                     |                      |                   |
|---------------------|-------------|--------------|-------------|--------------|-------------|-------------|---------------------|----------------------|-------------------|
| ENSDARG00000013776  | 106.5639242 | -0.763140238 | 0.221451557 | -3.446082063 | 0.000568778 | 0.014269019 | thop1               | ZDB-GENE-040718-47   | thop1             |
| ENSDARG00000070453  | 228.6639975 | -0.720350218 | 0.209155224 | -3.444093838 | 0.000572977 | 0.014356983 | gch1                | ZDB-GENE-070720-5    | gch1              |
| ENSDARG00000091801  | 164.9770252 | -0.438413137 | 0.12734713  | -3.442662098 | 0.000576019 | 0.01437965  | serpinb14           | ZDB-GENE-050506-148  | serpinb14         |
| ENSDARG00000074776  | 14.64088744 | -0.814289943 | 0.236564008 | -3.442154822 | 0.0005771   | 0.01437965  | tmem154             | ZDB-GENE-030131-2401 | tmem154           |
| ENSDARG00000078729  | 5.098486418 | 1.313753299  | 0.381670723 | 3.442111797  | 0.000577192 | 0.01437965  | ackr4a              | ZDB-GENE-070301-6    | ackr4a            |
| ENSDARG00000079997  | 9.046031438 | 1.132550433  | 0.32903383  | 3.442048592  | 0.000577327 | 0.01437965  | si:zfos-223e1.2     | ZDB-GENE-110411-269  | si:zfos-223e1.2   |
| ENSDARG00000078419  | 74.29537924 | 0.653624856  | 0.189894774 | 3.442037101  | 0.000577351 | 0.01437965  | filip1a             | ZDB-GENE-030131-4110 | filip1a           |
| ENSDARG00000092919  | 1.14857605  | -5.249328985 | 1.52540204  | -3.441275707 | 0.000578978 | 0.014402866 | zp3c                | ZDB-GENE-060817-5    | zp3c              |
| ENSDARG00000104493  | 51.69076939 | 0.556779342  | 0.161977574 | 3.43738536   | 0.000587359 | 0.014593836 | LO018176.1          |                      |                   |
| ENSDARG00000003963  | 49.31036545 | 0.531883188  | 0.154764    | 3.436737154  | 0.000588767 | 0.014611285 | traf4a              | ZDB-GENE-040308-1    | traf4a            |
| ENSDARG00000042272  | 9.130122387 | -1.053620306 | 0.306710561 | -3.435226694 | 0.000592058 | 0.014675398 | tmem231             | ZDB-GENE-040426-1386 | tmem231           |
| ENSDARG00000105498  | 9.376054523 | -1.031102181 | 0.300624066 | -3.42987238  | 0.000603865 | 0.014950173 | TSC22D3 (1 of many) | ZDB-GENE-160114-28   | si:ch211-220e11.3 |
| ENSDARG00000043843  | 79.30380305 | 0.589889747  | 0.17204214  | 3.428751498  | 0.000606364 | 0.014994134 | akap7               | ZDB-GENE-040724-128  | akap7             |
| ENSDARG00000088923  | 3.986709357 | -7.662796506 | 2.238010118 | -3.423932915 | 0.000617219 | 0.015244342 | si:ch211-12h2.8     | ZDB-GENE-091118-43   | si:ch211-12h2.8   |
| ENSDARG00000078592  | 197.0690734 | -0.513534794 | 0.150056633 | -3.422273207 | 0.000620999 | 0.015319449 | nomo                | ZDB-GENE-040826-3    | nomo              |
| ENSDARG00000020377  | 437.4221762 | -0.452956924 | 0.132428376 | -3.420391748 | 0.00062531  | 0.015407464 | eif4g2a             | ZDB-GENE-030131-2173 | eif4g2a           |
| ENSDARG00000038802  | 3.691470878 | -1.804926642 | 0.527792297 | -3.419766928 | 0.000626748 | 0.015424553 | cenpl               | ZDB-GENE-040930-6    | cenpl             |
| ENSDARG00000077400  | 94.67111806 | 0.529129638  | 0.154829757 | 3.417493174  | 0.000632007 | 0.015535522 | rbm10               | ZDB-GENE-100922-245  | rbm10             |
| ENSDARG00000005699  | 142.1120169 | -0.572539818 | 0.167581785 | -3.416480004 | 0.000634363 | 0.015559168 | ddx19               | ZDB-GENE-020419-30   | ddx19             |
| ENSDARG00000038583  | 150.7398641 | -0.641197145 | 0.187680239 | -3.416433976 | 0.00063447  | 0.015559168 | abraa               | ZDB-GENE-120730-1    | abraa             |
| ENSDARG00000008807  | 2.942723422 | -2.303516283 | 0.674431826 | -3.415491666 | 0.00063667  | 0.015594647 | bokb                | ZDB-GENE-040426-1346 | bokb              |
| ENSDARG00000033413  | 90.09733843 | -0.5754356   | 0.168508469 | -3.414876426 | 0.00063811  | 0.015600141 | acot18              | ZDB-GENE-041210-254  | acot18            |
| ENSDARG00000029063  | 260.970529  | -0.374046196 | 0.109538301 | -3.414752566 | 0.0006384   | 0.015600141 | clpxa               | ZDB-GENE-040912-143  | clpxa             |
| ENSDARG00000099999  | 198.204042  | 0.284491039  | 0.083360203 | 3.412792061  | 0.00064301  | 0.015694288 | tcf3b               | ZDB-GENE-051113-64   | tcf3b             |
| ENSDARG00000021032  | 32.99009864 | 0.655742315  | 0.192277213 | 3.410400562  | 0.000648675 | 0.015813941 | foxd3               | ZDB-GENE-980526-143  | foxd3             |
| ENSDARG00000098375  | 267.3144557 | -0.408422437 | 0.119775729 | -3.409893155 | 0.000649883 | 0.015824774 | polr1a              | ZDB-GENE-030131-5286 | polr1a            |
| ENSDARG00000091609  | 192.7237089 | 0.769774259  | 0.225886823 | 3.407787362  | 0.000654919 | 0.015928678 | spink4              | ZDB-GENE-130821-1    | spink4            |
| ENSDARG000000112895 | 5.96501952  | -1.717382097 | 0.504228702 | -3.405958622 | 0.000659322 | 0.016016957 | FO834857.1          |                      |                   |
| ENSDARG00000003699  | 145.6960211 | -0.358776344 | 0.105353393 | -3.405456018 | 0.000660537 | 0.016027679 | atp7a               | ZDB-GENE-060825-45   | atp7a             |
| ENSDARG00000029510  | 204.5900092 | -0.561862518 | 0.16501454  | -3.40492734  | 0.000661817 | 0.016039958 | tim17a              | ZDB-GENE-031030-6    | tim17a            |
| ENSDARG00000079532  | 16.04273484 | -0.834141648 | 0.245197488 | -3.401917585 | 0.000669148 | 0.016198701 | zgc:194242          | ZDB-GENE-081022-84   | zgc:194242        |
| ENSDARG00000071583  | 5.001501557 | -6.876204648 | 2.021515099 | -3.401510407 | 0.000670146 | 0.016203921 | gtf3ab              | ZDB-GENE-030131-7698 | gtf3ab            |
| ENSDARG00000059003  | 37.39078537 | 0.645835346  | 0.189897376 | 3.400970359  | 0.000671471 | 0.016217044 | strip2              | ZDB-GENE-120328-1    | strip2            |
| ENSDARG00000061450  | 57.13039154 | 0.613255237  | 0.180373758 | 3.399913843  | 0.000674071 | 0.016260881 | tesk2               | ZDB-GENE-070209-68   | tesk2             |
| ENSDARG00000105364  | 45.2104874  | 0.856126238  | 0.251844726 | 3.399420955  | 0.000675287 | 0.016271275 | si:ch73-223f5.1     | ZDB-GENE-160113-94   | si:ch73-223f5.1   |
| ENSDARG00000011553  | 1140.895306 | -0.263532738 | 0.077538126 | -3.398750432 | 0.000676945 | 0.016292271 | atp5pb              | ZDB-GENE-041010-33   | atp5pb            |
| ENSDARG00000018165  | 8.359379315 | -1.412398828 | 0.415771728 | -3.39705356  | 0.000681156 | 0.016374619 | depdc1a             | ZDB-GENE-030131-9827 | depdc1a           |
| ENSDARG00000103991  | 142.7446227 | -0.461683444 | 0.135925176 | -3.39659993  | 0.000682286 | 0.01638278  | sec14l1             | ZDB-GENE-040426-801  | sec14l1           |
| ENSDARG00000061850  | 33.0333713  | 0.795183277  | 0.23423305  | 3.394838071  | 0.000686692 | 0.016469481 | si:dkey-19b23.13    | ZDB-GENE-140106-78   | si:dkey-19b23.13  |
| ENSDARG00000008904  | 290.7618008 | 0.300826204  | 0.088641967 | 3.39372214   | 0.000689496 | 0.016517617 | smarca2             | ZDB-GENE-030131-5964 | smarca2           |
| ENSDARG00000073905  | 135.1447561 | 0.427243982  | 0.125925491 | 3.392831578  | 0.000691742 | 0.016552273 | zgc:92481           | ZDB-GENE-040912-181  | zgc:92481         |
| ENSDARG00000075113  | 8.560896995 | -8.836189112 | 2.605710937 | -3.391085706 | 0.000696163 | 0.016638864 | nanog               | ZDB-GENE-030131-5486 | nanog             |
| ENSDARG00000092954  | 81.88151698 | -0.514510929 | 0.151818878 | -3.388978609 | 0.000701535 | 0.016728858 | mrpl34              | ZDB-GENE-070912-582  | mrpl34            |
| ENSDARG00000070040  | 6.127629813 | -1.41895618  | 0.418697699 | -3.38897535  | 0.000701543 | 0.016728858 | zgc:162344          | ZDB-GENE-030131-6058 | zgc:162344        |
| ENSDARG00000077982  | 114.4860993 | 0.616589849  | 0.182041668 | 3.387080853  | 0.000706406 | 0.016800063 | elf3                | ZDB-GENE-030131-8760 | elf3              |
| ENSDARG00000077737  | 41.25494846 | 0.626713824  | 0.185037061 | 3.386963775  | 0.000706707 | 0.016800063 | spsb3a              | ZDB-GENE-030131-4182 | spsb3a            |

|                    |             |              |             |              |             |             |                   |                      |                   |
|--------------------|-------------|--------------|-------------|--------------|-------------|-------------|-------------------|----------------------|-------------------|
| ENSDARG00000089802 | 1.63980811  | -5.81247226  | 1.71618063  | -3.386865087 | 0.000706961 | 0.016800063 | akap1a            | ZDB-GENE-030131-5980 | akap1a            |
| ENSDARG00000054510 | 66.80564781 | -0.661432564 | 0.195376537 | -3.385424744 | 0.000710682 | 0.016869131 | adrb2b            | ZDB-GENE-070410-32   | adrb2b            |
| ENSDARG00000057624 | 57.52494278 | -0.527154075 | 0.155774904 | -3.384075755 | 0.000714183 | 0.016932837 | cops5             | ZDB-GENE-040426-1686 | cops5             |
| ENSDARG00000062109 | 15.70596915 | -0.876706158 | 0.259123698 | -3.383349981 | 0.000716073 | 0.016958249 | shdb              | ZDB-GENE-030131-6059 | shdb              |
| ENSDARG00000024311 | 12.08974983 | -0.831070789 | 0.24584034  | -3.38053059  | 0.00072346  | 0.017113633 | nsmce4a           | ZDB-GENE-050522-111  | nsmce4a           |
| ENSDARG00000007276 | 18668.078   | 0.736366888  | 0.217901756 | 3.3793527    | 0.000726567 | 0.017159518 | ela3l             | ZDB-GENE-060710-2    | ela3l             |
| ENSDARG00000029039 | 3.671651556 | -1.835500091 | 0.543181099 | -3.37916782  | 0.000727056 | 0.017159518 | zdhhc23a          | ZDB-GENE-060526-38   | zdhhc23a          |
| ENSDARG00000019304 | 4.787111318 | -1.4015521   | 0.414892603 | -3.378108185 | 0.000729864 | 0.017185128 | phactr3b          | ZDB-GENE-050522-156  | phactr3b          |
| ENSDARG00000089388 | 7.276510341 | 1.48819852   | 0.440593825 | 3.377710798  | 0.000730919 | 0.017185128 | ftr35             | ZDB-GENE-070912-111  | ftr35             |
| ENSDARG00000062460 | 64.43505207 | -0.456371025 | 0.135113682 | -3.377681802 | 0.000730996 | 0.017185128 | sgk3              | ZDB-GENE-070424-62   | sgk3              |
| ENSDARG00000057738 | 84.19515856 | -0.705743987 | 0.208954058 | -3.377507918 | 0.000731458 | 0.017185128 | hells             | ZDB-GENE-030131-9923 | hells             |
| ENSDARG00000076847 | 363.1847081 | 0.447005845  | 0.132410397 | 3.375911982  | 0.000735715 | 0.017252301 | tnrc6c1           | ZDB-GENE-030131-7440 | tnrc6c1           |
| ENSDARG00000004460 | 15.61122614 | -0.904451332 | 0.267921145 | -3.375811691 | 0.000735983 | 0.017252301 | desi2             | ZDB-GENE-040801-39   | desi2             |
| ENSDARG00000057863 | 10.9513263  | -1.130018163 | 0.334816339 | -3.375038886 | 0.000738053 | 0.017281273 | dnmt3bb.3         | ZDB-GENE-050314-2    | dnmt3bb.3         |
| ENSDARG00000014179 | 203.5803529 | -0.730802893 | 0.216624354 | -3.373595251 | 0.000741934 | 0.01735254  | pfkma             | ZDB-GENE-040912-135  | pfkma             |
| ENSDARG00000051962 | 135.8930373 | 0.340990847  | 0.101115172 | 3.372301506  | 0.000745428 | 0.017414609 | mmp15a            | ZDB-GENE-070817-4    | mmp15a            |
| ENSDARG00000001767 | 14.21224453 | -1.014445461 | 0.30095027  | -3.370807615 | 0.000749482 | 0.017470082 | slc29a2           | ZDB-GENE-050220-15   | slc29a2           |
| ENSDARG00000091503 | 29.1866535  | -0.623871729 | 0.185080926 | -3.370805107 | 0.000749489 | 0.017470082 | CABZ01073954.1    |                      |                   |
| ENSDARG00000078069 | 68.39257643 | -0.958062397 | 0.284262559 | -3.37034325  | 0.000750746 | 0.01747973  | rrm2              | ZDB-GENE-990415-25   | rrm2              |
| ENSDARG00000095463 | 5.497370877 | -6.061439537 | 1.798632415 | -3.370026854 | 0.000751609 | 0.017480172 | si:ch73-90k17.1   | ZDB-GENE-090312-218  | si:ch73-90k17.1   |
| ENSDARG00000042627 | 100.2857484 | 0.562417103  | 0.166941808 | 3.368941017  | 0.000754576 | 0.017529505 | nhs1b             | ZDB-GENE-040910-1    | nhs1b             |
| ENSDARG00000077469 | 74.7688183  | -0.575807936 | 0.170950089 | -3.368281001 | 0.000756385 | 0.017541692 | polr1b            | ZDB-GENE-040426-1598 | polr1b            |
| ENSDARG00000069463 | 85.22846777 | 0.497671378  | 0.147758867 | 3.368132057  | 0.000756793 | 0.017541692 | alox12            | ZDB-GENE-030131-1452 | alox12            |
| ENSDARG00000036438 | 711.5879282 | -0.332285065 | 0.09873094  | -3.365561644 | 0.00076388  | 0.017686168 | ndufv1            | ZDB-GENE-040808-73   | ndufv1            |
| ENSDARG00000062593 | 22.94431787 | 0.768855295  | 0.22858987  | 3.363470542  | 0.000769691 | 0.017800811 | stox1             | ZDB-GENE-030925-2    | stox1             |
| ENSDARG00000019541 | 697.8367496 | -0.408962481 | 0.121639318 | -3.362091209 | 0.000773546 | 0.017870026 | gpt2l             | ZDB-GENE-050302-11   | gpt2l             |
| ENSDARG00000104129 | 10.54542637 | -1.095986082 | 0.326185994 | -3.360003497 | 0.000779415 | 0.017985562 | si:dkey-23n7.10   | ZDB-GENE-141222-64   | si:dkey-23n7.10   |
| ENSDARG00000071238 | 10.31982302 | 1.217575443  | 0.362491209 | 3.358910267  | 0.000782505 | 0.018024088 | ftr58             | ZDB-GENE-080219-44   | ftr58             |
| ENSDARG00000007996 | 47.034879   | 0.514402792  | 0.153150878 | 3.358797531  | 0.000782824 | 0.018024088 | pou2f1b           | ZDB-GENE-030131-2422 | pou2f1b           |
| ENSDARG00000102554 | 8.461935489 | -1.073570188 | 0.319690407 | -3.358155782 | 0.000784644 | 0.018036812 | zgc:112433        | ZDB-GENE-050417-294  | zgc:112433        |
| ENSDARG00000098746 | 132.7075347 | 0.817607869  | 0.243481404 | 3.357988969  | 0.000785117 | 0.018036812 | dhrs13l1          | ZDB-GENE-040426-1907 | dhrs13l1          |
| ENSDARG00000103286 | 10.42773856 | -1.040415738 | 0.309889592 | -3.357375541 | 0.000786862 | 0.018052965 | kcnk4a            | ZDB-GENE-141211-80   | kcnk4a            |
| ENSDARG00000079372 | 130.215316  | -0.474960559 | 0.141480182 | -3.357081915 | 0.000787698 | 0.018052965 | si:ch211-264f5.6  | ZDB-GENE-081104-208  | si:ch211-264f5.6  |
| ENSDARG00000092162 | 30.65475356 | 0.797046412  | 0.237440666 | 3.356823525  | 0.000788434 | 0.018052965 | mhc1zaa           | ZDB-GENE-030916-1    | mhc1zaa           |
| ENSDARG00000054473 | 11.75770331 | -0.92150042  | 0.274653995 | -3.355132042 | 0.000793271 | 0.018143669 | tinf2             | ZDB-GENE-030131-6168 | tinf2             |
| ENSDARG00000095448 | 4.896607351 | 1.480967231  | 0.441862123 | 3.351650103  | 0.000803315 | 0.018313489 | ftr30             | ZDB-GENE-070912-106  | ftr30             |
| ENSDARG00000006062 | 388.0245399 | -0.420583567 | 0.12548803  | -3.351583161 | 0.000803509 | 0.018313489 | akap1b            | ZDB-GENE-030131-6844 | akap1b            |
| ENSDARG00000093216 | 25.73287077 | -10.06598441 | 3.003519378 | -3.351396526 | 0.000804051 | 0.018313489 | si:ch211-146l10.7 | ZDB-GENE-091112-4    | si:ch211-146l10.7 |
| ENSDARG00000014208 | 2.041348788 | -5.375783222 | 1.604072428 | -3.351334472 | 0.000804231 | 0.018313489 | zgc:55413         | ZDB-GENE-040426-2909 | zgc:55413         |
| ENSDARG00000101259 | 29.38362595 | -0.668755996 | 0.199584598 | -3.350739501 | 0.000805961 | 0.018332733 | hgh1              | ZDB-GENE-040718-228  | hgh1              |
| ENSDARG00000090679 | 48.19060127 | 0.474297379  | 0.141590218 | 3.349789158  | 0.000808731 | 0.018375573 | si:ch211-79k12.2  | ZDB-GENE-131121-535  | si:ch211-79k12.2  |
| ENSDARG00000003250 | 38.74476517 | 0.529266756  | 0.158051184 | 3.348704784  | 0.000811903 | 0.018427431 | pik3cd            | ZDB-GENE-040426-1128 | pik3cd            |
| ENSDARG00000101332 | 90.56542715 | -0.468095063 | 0.139824362 | -3.347736089 | 0.000814746 | 0.01846825  | uba2              | ZDB-GENE-040426-2681 | uba2              |
| ENSDARG00000005355 | 37.76374141 | -0.91740472  | 0.274057888 | -3.347485179 | 0.000815483 | 0.01846825  | larp6a            | ZDB-GENE-030131-6403 | larp6a            |
| ENSDARG00000032206 | 161.7396735 | 0.618960947  | 0.184941646 | 3.346790524  | 0.00081753  | 0.018494377 | cthl              | ZDB-GENE-040905-3    | cthl              |
| ENSDARG00000092112 | 127.2460837 | -0.394742512 | 0.117962312 | -3.346344308 | 0.000818846 | 0.018503966 | tomm40            | ZDB-GENE-030131-1365 | tomm40            |

|                    |             |              |             |              |             |             |                   |                      |                   |
|--------------------|-------------|--------------|-------------|--------------|-------------|-------------|-------------------|----------------------|-------------------|
| ENSDARG0000004211  | 86.8765496  | 0.465037793  | 0.138998155 | 3.345640039  | 0.000820929 | 0.018530816 | ccdc106a          | ZDB-GENE-050220-4    | ccdc106a          |
| ENSDARG00000013333 | 365.2631336 | -0.412930342 | 0.123464232 | -3.344534172 | 0.000824209 | 0.018584607 | ndufa10           | ZDB-GENE-030131-670  | ndufa10           |
| ENSDARG00000022698 | 190.8783921 | 0.614889649  | 0.183937215 | 3.342932263  | 0.000828981 | 0.018653475 | lad1              | ZDB-GENE-030616-268  | lad1              |
| ENSDARG00000058358 | 4854.340267 | 0.322384932  | 0.096438562 | 3.342904808  | 0.000829063 | 0.018653475 | krt8              | ZDB-GENE-030411-5    | krt8              |
| ENSDARG00000036588 | 2040.022341 | 0.474889867  | 0.14217482  | 3.340182651  | 0.000837233 | 0.018813301 | mhc1zba           | ZDB-GENE-040426-2149 | mhc1zba           |
| ENSDARG00000075557 | 58.93989112 | 0.537814826  | 0.161026204 | 3.33992115   | 0.000838022 | 0.018813301 | apcdd1l           | ZDB-GENE-121022-3    | apcdd1l           |
| ENSDARG00000056832 | 6.289136569 | -1.526170192 | 0.456987345 | -3.339633382 | 0.000838891 | 0.018813301 | exo1              | ZDB-GENE-040426-2828 | exo1              |
| ENSDARG00000008805 | 20.10682663 | -0.896295322 | 0.268517024 | -3.33794598  | 0.000844002 | 0.018887455 | orc3              | ZDB-GENE-030131-6247 | orc3              |
| ENSDARG00000038321 | 112.5910405 | 0.806867665  | 0.241726241 | 3.337939899  | 0.00084402  | 0.018887455 | zgc:172053        | ZDB-GENE-080219-25   | zgc:172053        |
| ENSDARG00000060594 | 520.5510476 | -0.513708577 | 0.153924336 | -3.337409724 | 0.000845632 | 0.01888813  | hadhab            | ZDB-GENE-041111-204  | hadhab            |
| ENSDARG00000016200 | 62.77172492 | -0.552608887 | 0.16558411  | -3.337330423 | 0.000845873 | 0.01888813  | trib3             | ZDB-GENE-040426-2609 | trib3             |
| ENSDARG00000079188 | 0.923943881 | 3.270233064  | 0.980075932 | 3.33671398   | 0.000847751 | 0.018909693 | nxph2b            | ZDB-GENE-090708-1    | nxph2b            |
| ENSDARG00000097445 | 15.60730234 | 0.838634369  | 0.251398604 | 3.335875204  | 0.000850313 | 0.018940124 | si:dkey-195m11.8  | ZDB-GENE-030131-3092 | si:dkey-195m11.8  |
| ENSDARG00000074367 | 97.34528443 | 0.421437273  | 0.126342648 | 3.335669148  | 0.000850944 | 0.018940124 | usp12b            | ZDB-GENE-100209-4    | usp12b            |
| ENSDARG00000105190 | 9.960452368 | 1.071262946  | 0.321214572 | 3.335038447  | 0.000852876 | 0.018962766 | rhbdl3            | ZDB-GENE-050417-2    | rhbdl3            |
| ENSDARG00000006508 | 48.35903072 | -0.69641612  | 0.208888085 | -3.333919792 | 0.000856313 | 0.019018786 | pip5k1bb          | ZDB-GENE-040912-141  | pip5k1bb          |
| ENSDARG00000058053 | 637.1191627 | 0.556541731  | 0.166971373 | 3.333156584  | 0.000858666 | 0.019050618 | serping1          | ZDB-GENE-030131-1262 | serping1          |
| ENSDARG00000086985 | 263.3513095 | 0.43566787   | 0.130720648 | 3.332816021  | 0.000859718 | 0.019053552 | klc4              | ZDB-GENE-050417-350  | klc4              |
| ENSDARG00000054916 | 255.852981  | -0.806707168 | 0.242133252 | -3.331666192 | 0.000863277 | 0.019112002 | eif4ebp3          | ZDB-GENE-041114-44   | eif4ebp3          |
| ENSDARG00000044511 | 132.6473594 | 0.946095148  | 0.284081533 | 3.330364837  | 0.000867323 | 0.019181066 | etv5b             | ZDB-GENE-991228-4    | etv5b             |
| ENSDARG00000071694 | 22.38963332 | -0.861243969 | 0.258649241 | -3.329775738 | 0.00086916  | 0.019201199 | ndc80             | ZDB-GENE-030131-904  | ndc80             |
| ENSDARG00000058953 | 384.7915252 | -0.365386065 | 0.109759872 | -3.328958543 | 0.000871714 | 0.019237117 | abcc4             | ZDB-GENE-030616-511  | abcc4             |
| ENSDARG00000071541 | 1.210509607 | -3.940879766 | 1.183982035 | -3.328496252 | 0.000873162 | 0.019248573 | si:dkey-42i9.8    | ZDB-GENE-050208-412  | si:dkey-42i9.8    |
| ENSDARG00000014770 | 305.2508396 | -0.345338742 | 0.103857165 | -3.325131595 | 0.000883768 | 0.019397713 | usp4              | ZDB-GENE-041008-187  | usp4              |
| ENSDARG00000005823 | 208.7959949 | 0.400726819  | 0.120516891 | 3.32506768   | 0.000883971 | 0.019397713 | slc39a10          | ZDB-GENE-040426-1157 | slc39a10          |
| ENSDARG00000100686 | 1.693850526 | -2.910287599 | 0.875258024 | -3.325062461 | 0.000883987 | 0.019397713 | si:ch211-241b2.4  | ZDB-GENE-081104-191  | si:ch211-241b2.4  |
| ENSDARG00000092770 | 1.055748479 | 4.31725217   | 1.298473333 | 3.324867797  | 0.000884605 | 0.019397713 | si:ch211-253p18.2 | ZDB-GENE-041001-106  | si:ch211-253p18.2 |
| ENSDARG00000074828 | 2.588659383 | -2.145131983 | 0.645225255 | -3.324624955 | 0.000885375 | 0.019397713 | rhobtb2a          | ZDB-GENE-081105-67   | rhobtb2a          |
| ENSDARG00000012944 | 16601.63441 | -0.975040685 | 0.293283073 | -3.324571977 | 0.000885544 | 0.019397713 | myhz2             | ZDB-GENE-020604-1    | myhz2             |
| ENSDARG00000015918 | 425.3102712 | -0.356017662 | 0.107135748 | -3.32305202  | 0.000890383 | 0.019466691 | dlat              | ZDB-GENE-030131-2921 | dlat              |
| ENSDARG00000063385 | 99.3029473  | -0.678033557 | 0.20404303  | -3.322992988 | 0.000890572 | 0.019466691 | cenpe             | ZDB-GENE-060929-860  | cenpe             |
| ENSDARG00000019418 | 11.69034718 | 1.027776142  | 0.309459086 | 3.321202021  | 0.000896306 | 0.019565384 | kcnj2a            | ZDB-GENE-120319-1    | kcnj2a            |
| ENSDARG00000089873 | 4.935091577 | 1.955125722  | 0.588717045 | 3.320993912  | 0.000896975 | 0.019565384 | CU467110.1        |                      |                   |
| ENSDARG00000019693 | 233.8463125 | 0.377677338  | 0.113806496 | 3.318592102  | 0.000904725 | 0.019713678 | clcn5a            | ZDB-GENE-091113-15   | clcn5a            |
| ENSDARG00000093964 | 113.6790824 | 0.524330402  | 0.15803848  | 3.317738833  | 0.000907493 | 0.019753223 | si:ch211-250k18.6 | ZDB-GENE-070912-245  | si:ch211-250k18.6 |
| ENSDARG00000029443 | 74.64110634 | -0.581697316 | 0.175355384 | -3.317248106 | 0.000909088 | 0.01976719  | zgc:92242         | ZDB-GENE-040718-371  | zgc:92242         |
| ENSDARG00000007285 | 57.77791258 | -0.539514926 | 0.162756741 | -3.314854571 | 0.000916908 | 0.019916321 | mrpl57            | ZDB-GENE-040426-1745 | mrpl57            |
| ENSDARG00000100818 | 2.301606057 | -2.553475196 | 0.770396905 | -3.314493064 | 0.000918095 | 0.01992121  | si:ch73-97h19.2   | ZDB-GENE-120214-33   | si:ch73-97h19.2   |
| ENSDARG00000016811 | 64.64416002 | -0.498905575 | 0.150593464 | -3.312929805 | 0.000923241 | 0.020011935 | ints3             |                      |                   |
| ENSDARG00000095665 | 15.14541996 | 0.946471127  | 0.285853441 | 3.311036324  | 0.000929511 | 0.020126788 | si:ch211-191a16.2 | ZDB-GENE-081028-45   | si:ch211-191a16.2 |
| ENSDARG00000008765 | 74.26618281 | -0.546750051 | 0.16518256  | -3.309974428 | 0.000933045 | 0.02018221  | tmed5             | ZDB-GENE-040426-1302 | tmed5             |
| ENSDARG00000035810 | 221.6558281 | -0.396609733 | 0.11985904  | -3.308968036 | 0.000936405 | 0.020217541 | rgcc              | ZDB-GENE-040704-31   | rgcc              |
| ENSDARG00000014320 | 162.6537829 | 0.611665718  | 0.184854647 | 3.308900964  | 0.00093663  | 0.020217541 | gucy2c            | ZDB-GENE-091118-67   | gucy2c            |
| ENSDARG00000074727 | 64.45834316 | -0.402173675 | 0.121582282 | -3.307831281 | 0.000940214 | 0.0202738   | dnajc10           | ZDB-GENE-070327-1    | dnajc10           |
| ENSDARG00000101634 | 5.558654429 | 1.420302574  | 0.429468525 | 3.307116797  | 0.000942616 | 0.020304454 | si:ch211-209j12.1 | ZDB-GENE-120709-44   | si:ch211-209j12.1 |
| ENSDARG00000043317 | 43.74857867 | 0.553906374  | 0.167515531 | 3.306597123  | 0.000944366 | 0.020315263 | kita              | ZDB-GENE-980526-464  | kita              |

|                    |             |              |             |              |             |             |                    |                      |                  |
|--------------------|-------------|--------------|-------------|--------------|-------------|-------------|--------------------|----------------------|------------------|
| ENSDARG00000015887 | 2870.092485 | 0.402882681  | 0.121849867 | 3.306385896  | 0.000945078 | 0.020315263 | b2ml               | ZDB-GENE-040426-2136 | b2ml             |
| ENSDARG00000056483 | 106.1755633 | 0.31834319   | 0.096349346 | 3.304051373  | 0.000952984 | 0.020463966 | ssbp4              | ZDB-GENE-030131-469  | ssbp4            |
| ENSDARG00000030154 | 124.4315622 | 0.552838737  | 0.167336643 | 3.303751802  | 0.000954003 | 0.020464638 | pak7               | ZDB-GENE-040426-2085 | pak7             |
| ENSDARG00000011583 | 75.94517877 | -0.653366978 | 0.197822794 | -3.302789157 | 0.000957283 | 0.02051378  | cry1b              | ZDB-GENE-010426-3    | cry1b            |
| ENSDARG00000041359 | 61.13014717 | 0.412768171  | 0.125026654 | 3.301441402  | 0.000961894 | 0.020567475 | zgc:161969         | ZDB-GENE-030131-2597 | zgc:161969       |
| ENSDARG00000089489 | 19.53608002 | -0.73339133  | 0.222148108 | -3.301362041 | 0.000962166 | 0.020567475 | fam83e             | ZDB-GENE-141215-21   | fam83e           |
| ENSDARG00000036721 | 47.17464417 | -0.591685541 | 0.179234175 | -3.301187068 | 0.000962767 | 0.020567475 | tomm40l            | ZDB-GENE-040426-2319 | tomm40l          |
| ENSDARG00000073735 | 5.192044918 | 1.318264946  | 0.399372876 | 3.300837454  | 0.000963967 | 0.020569648 | ft95               | ZDB-GENE-070912-105  | ft95             |
| ENSDARG00000042859 | 46.74165926 | 0.724097818  | 0.219385055 | 3.300579519  | 0.000964854 | 0.020569648 | slc5a6a            | ZDB-GENE-041001-177  | slc5a6a          |
| ENSDARG00000006514 | 57.95068299 | 0.507335496  | 0.153749316 | 3.29975775   | 0.000967683 | 0.020604887 | her6               | ZDB-GENE-980526-144  | her6             |
| ENSDARG00000086332 | 548.3264993 | 0.291179328  | 0.088249689 | 3.299494116  | 0.000968593 | 0.020604887 | bri3               | ZDB-GENE-030131-3038 | bri3             |
| ENSDARG00000014017 | 125.3748742 | -0.633225499 | 0.19194221  | -3.29904245  | 0.000970152 | 0.020604887 | rrm1               | ZDB-GENE-990415-247  | rrm1             |
| ENSDARG00000103479 | 136.5008007 | 0.481436116  | 0.145936321 | 3.298946512  | 0.000970484 | 0.020604887 | ptprfa             | ZDB-GENE-020107-2    | ptprfa           |
| ENSDARG00000106669 | 78.82181979 | 0.516301245  | 0.156539277 | 3.29822173   | 0.000972993 | 0.020629515 | CABZ01068358.1     |                      |                  |
| ENSDARG00000007745 | 530.6409348 | -0.500559758 | 0.151775085 | -3.298036416 | 0.000973635 | 0.020629515 | uqcrfs1            | ZDB-GENE-040426-2060 | uqcrfs1          |
| ENSDARG00000017180 | 298.0362864 | -0.35258416  | 0.106923883 | -3.297524843 | 0.00097541  | 0.020646022 | npc1               | ZDB-GENE-030131-3161 | npc1             |
| ENSDARG00000103154 | 61.65127734 | 0.703428821  | 0.213447443 | 3.295559839  | 0.000982258 | 0.020769741 | si:ch73-144l3.1    | ZDB-GENE-131119-96   | si:ch73-144l3.1  |
| ENSDARG00000074002 | 6.19764259  | -1.223236496 | 0.371255758 | -3.294862014 | 0.0009847   | 0.02080016  | slc6a11a           | ZDB-GENE-030131-3729 | slc6a11a         |
| ENSDARG00000004830 | 155.1315207 | 0.329188168  | 0.099961895 | 3.293136542  | 0.000990763 | 0.020901496 | flot2a             | ZDB-GENE-020430-3    | flot2a           |
| ENSDARG00000028957 | 41.62352521 | 0.557172833  | 0.169203096 | 3.292923402  | 0.000991515 | 0.020901496 | maff               | ZDB-GENE-040426-1280 | maff             |
| ENSDARG00000088989 | 8.538176845 | -8.817174314 | 2.678335769 | -3.292034708 | 0.000994653 | 0.020946348 | si:dkey-241l7.5    | ZDB-GENE-041014-237  | si:dkey-241l7.5  |
| ENSDARG00000104039 | 173.1613809 | -0.664044349 | 0.201827889 | -3.290151588 | 0.001001334 | 0.021065632 | errfi1a            | ZDB-GENE-030131-6256 | errfi1a          |
| ENSDARG00000098497 | 42.0891706  | 0.498812798  | 0.151690042 | 3.288368769  | 0.001007698 | 0.021160188 | hrasa              | ZDB-GENE-050417-95   | hrasa            |
| ENSDARG00000071055 | 47.62055233 | 0.538168846  | 0.163660715 | 3.288320266  | 0.001007871 | 0.021160188 | ZNF512B            | ZDB-GENE-090313-284  | si:dkey-256k13.2 |
| ENSDARG00000096280 | 12.06373158 | 1.161392902  | 0.353401552 | 3.286326546  | 0.001015033 | 0.021288974 | ighz               | ZDB-GENE-040513-8    | ighz             |
| ENSDARG00000044404 | 9.244542464 | -0.939093252 | 0.285829204 | -3.28550491  | 0.001017998 | 0.021329573 | pars2              | ZDB-GENE-030131-4219 | pars2            |
| ENSDARG00000016687 | 546.0483033 | -0.372508946 | 0.113404133 | -3.284791609 | 0.001020578 | 0.021348685 | acadvl             | ZDB-GENE-030131-899  | acadvl           |
| ENSDARG00000043722 | 2499.53724  | 0.809572079  | 0.246468832 | 3.284683392  | 0.00102097  | 0.021348685 | cpa4               | ZDB-GENE-040704-61   | cpa4             |
| ENSDARG00000104173 | 277.5999671 | -0.443944523 | 0.135210056 | -3.283369128 | 0.001025743 | 0.021426853 | tufm               | ZDB-GENE-050320-73   | tufm             |
| ENSDARG00000035870 | 81.71295797 | -0.428048025 | 0.130388041 | -3.282877953 | 0.001027531 | 0.021442604 | laptm4b            | ZDB-GENE-030616-616  | laptm4b          |
| ENSDARG00000002791 | 1551.822241 | -0.371510618 | 0.113181604 | -3.282429344 | 0.001029168 | 0.021455145 | atp1a1a.1          | ZDB-GENE-001212-1    | atp1a1a.1        |
| ENSDARG00000057262 | 130.4202346 | -0.56212464  | 0.17127646  | -3.281972545 | 0.001030836 | 0.021468334 | si:dkey-91i10.3    | ZDB-GENE-081105-124  | si:dkey-91i10.3  |
| ENSDARG00000025383 | 6.021553017 | -1.272809213 | 0.387888552 | -3.281378651 | 0.00103301  | 0.021491994 | arl2bp             | ZDB-GENE-040426-1604 | arl2bp           |
| ENSDARG00000051861 | 469.5602254 | -0.526607366 | 0.160623002 | -3.278530212 | 0.001043492 | 0.021687107 | pkp3a              | ZDB-GENE-060512-114  | pkp3a            |
| ENSDARG00000071223 | 46.20858825 | -1.723221435 | 0.525650783 | -3.278262851 | 0.001044481 | 0.021687107 | zgc:158445         | ZDB-GENE-061215-78   | zgc:158445       |
| ENSDARG00000054272 | 1285.959433 | 0.473517985  | 0.144481559 | 3.277359325  | 0.001047829 | 0.021732596 | caprin1b           | ZDB-GENE-040426-2020 | caprin1b         |
| ENSDARG00000004372 | 84.43090568 | 0.385063169  | 0.117500974 | 3.277106179  | 0.001048769 | 0.021732596 | fmln3              | ZDB-GENE-030131-1571 | fmln3            |
| ENSDARG00000008884 | 220.9531952 | -0.552123957 | 0.168513068 | -3.27644594  | 0.001051224 | 0.021759256 | hp1t1              | ZDB-GENE-040426-1918 | hp1t1            |
| ENSDARG00000030756 | 130.7230981 | -0.812237677 | 0.247920981 | -3.276195798 | 0.001052156 | 0.021759256 | dnmt1              | ZDB-GENE-990714-15   | dnmt1            |
| ENSDARG00000107086 | 2.947673612 | 1.895147787  | 0.578923082 | 3.273574409  | 0.001061964 | 0.021940203 | PIEZO2 (1 of many) |                      |                  |
| ENSDARG00000067829 | 42.23296633 | -0.705895003 | 0.215731223 | -3.272104022 | 0.001067503 | 0.022032665 | ppargc1a           | ZDB-GENE-080505-1    | ppargc1a         |
| ENSDARG00000052170 | 446.8780451 | 0.542961283  | 0.166011908 | 3.270616491  | 0.001073133 | 0.022100018 | uap1               | ZDB-GENE-030131-1233 | uap1             |
| ENSDARG00000058462 | 2640.023369 | 0.764463033  | 0.233747227 | 3.270468882  | 0.001073694 | 0.022100018 | zgc:158846         | ZDB-GENE-070209-50   | zgc:158846       |
| ENSDARG00000094760 | 30.81847426 | 0.677745168  | 0.207257605 | 3.270061759  | 0.00107524  | 0.022100018 | si:dkey-125i10.3   | ZDB-GENE-060526-198  | si:dkey-125i10.3 |
| ENSDARG00000054363 | 85.46834733 | -0.414393061 | 0.126724948 | -3.270019569 | 0.0010754   | 0.022100018 | si:zfos-464b6.2    | ZDB-GENE-030131-5337 | si:zfos-464b6.2  |
| ENSDARG00000026166 | 218.6320375 | 0.348170824  | 0.1064796   | 3.269835948  | 0.001076099 | 0.022100018 | emilin1b           | ZDB-GENE-060818-36   | emilin1b         |

|                    |             |              |              |              |             |             |                   |                      |                   |
|--------------------|-------------|--------------|--------------|--------------|-------------|-------------|-------------------|----------------------|-------------------|
| ENSDARG00000012972 | 366.6342714 | -0.428789545 | 0.131171658  | -3.268919151 | 0.001079591 | 0.022149796 | cf1l1             | ZDB-GENE-040426-2770 | cf1l1             |
| ENSDARG00000018105 | 579.8176705 | 0.525915803  | 0.160937112  | 3.267834227  | 0.001083738 | 0.022204688 | casq1b            | ZDB-GENE-060929-1070 | casq1b            |
| ENSDARG00000100498 | 131.2553359 | 0.716537746  | 0.219282594  | 3.267645331  | 0.001084462 | 0.022204688 | CABZ01079251.1    |                      |                   |
| ENSDARG00000099294 | 137.5112227 | 0.385786366  | 0.118072111  | 3.267379261  | 0.001085482 | 0.022204688 | si:ch73-199g24.2  | ZDB-GENE-081105-181  | si:ch73-199g24.2  |
| ENSDARG00000103799 | 1032.320524 | -0.24450182  | 0.074860233  | -3.26611087  | 0.001090356 | 0.022282393 | kars              | ZDB-GENE-021115-8    | kars              |
| ENSDARG00000042707 | 15.9285166  | -0.744408819 | 0.228130931  | -3.263077107 | 0.001102095 | 0.022487257 | cx30.3            | ZDB-GENE-040406-1    | cx30.3            |
| ENSDARG00000069133 | 98.38514144 | 0.560272826  | 0.171711922  | 3.262865031  | 0.00110292  | 0.022487257 | mstnb             | ZDB-GENE-990415-165  | mstnb             |
| ENSDARG00000016177 | 71.85271595 | -0.59617843  | 0.182730744  | -3.262606049 | 0.001103929 | 0.022487257 | eif4enif1         | ZDB-GENE-050320-113  | eif4enif1         |
| ENSDARG00000007526 | 424.3593511 | -0.307751579 | 0.094343331  | -3.262038499 | 0.001106141 | 0.022487257 | ndufs2            | ZDB-GENE-050522-273  | ndufs2            |
| ENSDARG00000005423 | 352.7513495 | -0.39530129  | 0.121187882  | -3.261887943 | 0.001106729 | 0.022487257 | pgam1a            | ZDB-GENE-030131-1827 | pgam1a            |
| ENSDARG00000096365 | 38.64379713 | 0.525597261  | 0.161134894  | 3.261846318  | 0.001106891 | 0.022487257 | si:ch211-195m9.3  | ZDB-GENE-120215-210  | si:ch211-195m9.3  |
| ENSDARG00000007278 | 17.00552792 | -1.212513241 | 0.371791754  | -3.261269859 | 0.001109144 | 0.022510958 | ect2              | ZDB-GENE-040831-2    | ect2              |
| ENSDARG00000077666 | 14.2713191  | -0.800771158 | 0.245597319  | -3.260504482 | 0.001112142 | 0.022534148 | evi5a             | ZDB-GENE-110218-2    | evi5a             |
| ENSDARG00000099579 | 205.2247084 | -0.554593614 | 0.170098671  | -3.26042297  | 0.001112462 | 0.022534148 | aldh18a1          | ZDB-GENE-030131-5602 | aldh18a1          |
| ENSDARG00000098663 | 16.1497657  | 3.288809302  | 1.008812922  | 3.260078484  | 0.001113814 | 0.022534994 | fgf19             | ZDB-GENE-030729-32   | fgf19             |
| ENSDARG00000102906 | 37.00342928 | -0.604396514 | 0.185405757  | -3.259858389 | 0.001114679 | 0.022534994 | hibadha           | ZDB-GENE-040801-264  | hibadha           |
| ENSDARG00000035715 | 431.238656  | 0.295965607  | 0.090873225  | 3.256906597  | 0.001126335 | 0.022748452 | marcks1b          | ZDB-GENE-040426-2315 | marcks1b          |
| ENSDARG00000075132 | 582.9377265 | -0.346165592 | 0.106325766  | -3.255707485 | 0.001131102 | 0.022822492 | fh                | ZDB-GENE-010724-6    | fh                |
| ENSDARG00000094896 | 1.065010862 | -2.97125971  | 0.1212926176 | -3.254654962 | 0.001135302 | 0.02288495  | rhm33b            | ZDB-GENE-060526-276  | rhm33b            |
| ENSDARG00000098635 | 226.731626  | 0.476297681  | 0.146365221  | 3.254172531  | 0.001137232 | 0.022886057 | irf2bp2b          | ZDB-GENE-040426-2574 | irf2bp2b          |
| ENSDARG00000075192 | 63.9829865  | -0.448162932 | 0.137723004  | -3.254089133 | 0.001137566 | 0.022886057 | yme1l1a           | ZDB-GENE-091113-41   | yme1l1a           |
| ENSDARG00000078935 | 70.17178177 | -0.506065635 | 0.155548626  | -3.25342401  | 0.001140232 | 0.022894416 | ttl4              | ZDB-GENE-070912-313  | ttl4              |
| ENSDARG00000044753 | 279.8332439 | -0.259850824 | 0.079874286  | -3.25324752  | 0.001140941 | 0.022894416 | idh3b             | ZDB-GENE-040625-174  | idh3b             |
| ENSDARG00000106212 | 45.93512782 | -1.029776431 | 0.316546594  | -3.253159094 | 0.001141296 | 0.022894416 | LO017965.1        |                      |                   |
| ENSDARG00000079011 | 269.0853137 | -0.673135654 | 0.206965499  | -3.252405146 | 0.001144328 | 0.022922606 | col17a1b          | ZDB-GENE-030131-7145 | col17a1b          |
| ENSDARG00000034956 | 94.40678458 | -0.476557768 | 0.146531276  | -3.252259731 | 0.001144913 | 0.022922606 | myclb             | ZDB-GENE-030131-5561 | myclb             |
| ENSDARG00000057456 | 108.6172077 | -0.323443115 | 0.099496992  | -3.25078286  | 0.001150877 | 0.023011119 | ppp3ccb           | ZDB-GENE-070112-1102 | ppp3ccb           |
| ENSDARG00000104505 | 4.139449616 | -1.637532814 | 0.503760867  | -3.250615366 | 0.001151555 | 0.023011119 | CABZ01046093.1    |                      |                   |
| ENSDARG00000089441 | 238.5031173 | -0.555497841 | 0.170972673  | -3.249044599 | 0.001157933 | 0.023116274 | si:ch211-105c13.3 | ZDB-GENE-030131-4483 | si:ch211-105c13.3 |
| ENSDARG00000090844 | 23.68318271 | 0.622636644  | 0.191736753  | 3.247351562  | 0.001164844 | 0.023231857 | CABZ01054965.1    |                      |                   |
| ENSDARG00000056691 | 194.7809307 | 0.455597227  | 0.140335335  | 3.246489741  | 0.001168377 | 0.023279904 | cpeb4a            | ZDB-GENE-040426-1557 | cpeb4a            |
| ENSDARG00000099519 | 47.60872542 | -0.498736382 | 0.153658106  | -3.245753799 | 0.001171401 | 0.023311803 | zgc:66475         | ZDB-GENE-040426-1644 | zgc:66475         |
| ENSDARG00000043323 | 71.9522898  | -0.455841079 | 0.140450975  | -3.245552972 | 0.001172228 | 0.023311803 | lnx1              | ZDB-GENE-030131-9439 | lnx1              |
| ENSDARG00000013841 | 77.82676265 | -0.380443646 | 0.117251204  | -3.244688626 | 0.001175791 | 0.023341944 | abl2              | ZDB-GENE-020809-2    | abl2              |
| ENSDARG00000069105 | 145.6942092 | 0.426785752  | 0.131535665  | 3.244639014  | 0.001175996 | 0.023341944 | fgfr4             | ZDB-GENE-980526-488  | fgfr4             |
| ENSDARG00000103472 | 61.30745318 | -0.601859709 | 0.185514296  | -3.24427671  | 0.001177493 | 0.023349291 | nedd8l            | ZDB-GENE-040718-295  | nedd8l            |
| ENSDARG00000091298 | 109.5907019 | 0.508125134  | 0.156686658  | 3.242938107  | 0.001183039 | 0.023436841 | pmela             | ZDB-GENE-030131-9818 | pmela             |
| ENSDARG00000100927 | 31.45313184 | 0.681193713  | 0.210107958  | 3.242112859  | 0.00118647  | 0.023474838 | nfatc2a           | ZDB-GENE-120913-4    | nfatc2a           |
| ENSDARG00000056600 | 71.97290582 | -0.511013427 | 0.157626193  | -3.241932168 | 0.001187223 | 0.023474838 | papss2b           | ZDB-GENE-010323-5    | papss2b           |
| ENSDARG00000100669 | 11.21222725 | 1.010851656  | 0.311846307  | 3.241505936  | 0.001189    | 0.023487559 | si:dkey-61p9.9    | ZDB-GENE-041210-240  | si:dkey-61p9.9    |
| ENSDARG00000103277 | 322.7669965 | -2.045288439 | 0.631226755  | -3.24018021  | 0.001194542 | 0.023574567 | cyp24a1           | ZDB-GENE-060825-1    | cyp24a1           |
| ENSDARG00000093019 | 12.17590503 | 1.078208306  | 0.332800761  | 3.239801202  | 0.001196131 | 0.023583462 | si:dkey-83k24.5   | ZDB-GENE-081104-440  | si:dkey-83k24.5   |
| ENSDARG00000116005 | 12.85333341 | -9.097914906 | 2.808782414  | -3.239095653 | 0.001199094 | 0.023619407 | zgc:171446        | ZDB-GENE-080205-1    | zgc:171446        |
| ENSDARG00000010948 | 70.01009702 | -0.717466628 | 0.221534021  | -3.238629554 | 0.001201055 | 0.023635568 | kif11             | ZDB-GENE-020426-1    | kif11             |
| ENSDARG00000007098 | 866.3581123 | 0.254377334  | 0.078561902  | 3.237922317  | 0.001204036 | 0.023671757 | itm2ba            | ZDB-GENE-030131-2352 | itm2ba            |
| ENSDARG00000075517 | 16.24103125 | -1.064298814 | 0.328850807  | -3.236418434 | 0.001210398 | 0.023774284 | si:ch211-120k19.1 | ZDB-GENE-100922-282  | si:ch211-120k19.1 |

|                    |             |              |             |              |             |             |                   |                      |                   |
|--------------------|-------------|--------------|-------------|--------------|-------------|-------------|-------------------|----------------------|-------------------|
| ENSDARG00000041411 | 7.670446956 | -1.077890865 | 0.333227252 | -3.234702017 | 0.001217697 | 0.023895006 | rad51             | ZDB-GENE-040426-2286 | rad51             |
| ENSDARG00000004196 | 271.7329044 | 0.487094842  | 0.15062624  | 3.233798055  | 0.001221558 | 0.023948084 | tnfsf10l          | ZDB-GENE-010801-1    | tnfsf10l          |
| ENSDARG00000069527 | 133.6214112 | -0.323154708 | 0.100010471 | -3.23120874  | 0.001232679 | 0.024143261 | ube2g1b           | ZDB-GENE-040426-2939 | ube2g1b           |
| ENSDARG00000025549 | 105.0496044 | -0.483176342 | 0.149673927 | -3.228193111 | 0.001245748 | 0.02436107  | ndufaf1           | ZDB-GENE-050306-9    | ndufaf1           |
| ENSDARG00000043608 | 121.8086028 | -0.488189037 | 0.15123104  | -3.228100772 | 0.001246151 | 0.02436107  | eif4ebp1          | ZDB-GENE-030131-2332 | eif4ebp1          |
| ENSDARG00000101320 | 18.1248867  | 1.171001988  | 0.362833589 | 3.227380332  | 0.001249293 | 0.024381522 | si:dkey-50i6.5    | ZDB-GENE-081031-53   | si:dkey-50i6.5    |
| ENSDARG00000061580 | 17.78476483 | 0.7555623    | 0.234114363 | 3.22732143   | 0.00124955  | 0.024381522 | kctd7             | ZDB-GENE-060804-2    | kctd7             |
| ENSDARG00000010331 | 3.996846887 | -1.443400455 | 0.447609479 | -3.224686972 | 0.001261105 | 0.024583832 | radx              | ZDB-GENE-081104-212  | radx              |
| ENSDARG00000105258 | 6.507211748 | -0.983553459 | 0.305088789 | -3.223826945 | 0.001264898 | 0.024634605 | cep72             | ZDB-GENE-101115-1    | cep72             |
| ENSDARG00000020455 | 61.03755574 | -0.505937791 | 0.157008656 | -3.222356045 | 0.00127141  | 0.024734509 | si:ch211-171h4.3  | ZDB-GENE-081031-85   | si:ch211-171h4.3  |
| ENSDARG00000053104 | 43.99722832 | -0.503691126 | 0.156326948 | -3.222036466 | 0.001272829 | 0.024734509 | fam102ba          | ZDB-GENE-060616-312  | fam102ba          |
| ENSDARG00000022232 | 104.0084462 | -0.681818462 | 0.211622552 | -3.221861069 | 0.001273609 | 0.024734509 | ppan              | ZDB-GENE-030114-4    | ppan              |
| ENSDARG00000071150 | 358.0385122 | 0.351132621  | 0.109035999 | 3.220336632  | 0.001280401 | 0.024843145 | cica              | ZDB-GENE-060503-700  | cica              |
| ENSDARG00000037099 | 84.99516129 | -1.385036293 | 0.430254307 | -3.219110815 | 0.001285888 | 0.024926256 | irs2a             | ZDB-GENE-040426-975  | irs2a             |
| ENSDARG00000105551 | 14.45447225 | 1.001407224  | 0.311149236 | 3.218414532  | 0.001289014 | 0.024963499 | si:cabz01101003.1 | ZDB-GENE-160728-148  | si:cabz01101003.1 |
| ENSDARG00000036080 | 1742.558807 | 0.281057757  | 0.087341368 | 3.217922556  | 0.001291227 | 0.024983008 | cd81a             | ZDB-GENE-000831-5    | cd81a             |
| ENSDARG00000010717 | 144.0933027 | -0.531831645 | 0.165322306 | -3.216938214 | 0.001295665 | 0.025045494 | chchd10           | ZDB-GENE-040426-1753 | chchd10           |
| ENSDARG00000019025 | 60.32459582 | 0.584949537  | 0.18190185  | 3.215742643  | 0.001301075 | 0.025126623 | podn              | ZDB-GENE-100922-117  | podn              |
| ENSDARG00000032575 | 480.7805325 | -0.377273548 | 0.117350389 | -3.21493224  | 0.001304753 | 0.025155902 | ywhaz             | ZDB-GENE-030131-8554 | ywhaz             |
| ENSDARG00000053858 | 317.7296587 | -0.479295243 | 0.149086796 | -3.214873851 | 0.001305019 | 0.025155902 | crip1             | ZDB-GENE-041111-1    | crip1             |
| ENSDARG00000045562 | 31.46955026 | -0.67489047  | 0.209971551 | -3.214199578 | 0.001308087 | 0.025158345 | pus1              | ZDB-GENE-041212-26   | pus1              |
| ENSDARG00000069422 | 84.65802389 | -0.558416289 | 0.173740982 | -3.214073512 | 0.001308662 | 0.025158345 | nhp2              | ZDB-GENE-030131-533  | nhp2              |
| ENSDARG00000001014 | 1402.98921  | 0.292614591  | 0.091042444 | 3.214045882  | 0.001308788 | 0.025158345 | myh9b             | ZDB-GENE-030131-998  | myh9b             |
| ENSDARG00000077762 | 57.60454011 | 0.517541869  | 0.161078224 | 3.212984704  | 0.001313633 | 0.025228082 | si:rp71-79p20.2   | ZDB-GENE-030616-83   | si:rp71-79p20.2   |
| ENSDARG00000105375 | 10.03412204 | 1.129449327  | 0.351680874 | 3.211574503  | 0.001320097 | 0.025328757 | si:ch211-285c6.5  | ZDB-GENE-160113-125  | si:ch211-285c6.5  |
| ENSDARG00000099889 | 185.4128989 | 0.992186467  | 0.309060069 | 3.210335361  | 0.001325802 | 0.025414679 | dusp27            | ZDB-GENE-140513-1    | dusp27            |
| ENSDARG00000078911 | 72.14087731 | 0.449877605  | 0.140248276 | 3.207846407  | 0.001337329 | 0.025611951 | zgc:163098        | ZDB-GENE-070410-141  | zgc:163098        |
| ENSDARG00000077082 | 51.53483641 | 0.610333644  | 0.192781777 | 3.207434427  | 0.001339246 | 0.02562498  | agtrap            | ZDB-GENE-050309-11   | agtrap            |
| ENSDARG00000029751 | 100.1243857 | -0.469337348 | 0.146398582 | -3.205887243 | 0.001346467 | 0.025739389 | wbp1lb            | ZDB-GENE-050522-112  | wbp1lb            |
| ENSDARG00000071347 | 59.6412166  | -0.478965025 | 0.149446939 | -3.20491693  | 0.001351015 | 0.025788883 | aftphb            | ZDB-GENE-060503-388  | aftphb            |
| ENSDARG00000070600 | 180.7252558 | 0.314693274  | 0.098194239 | 3.204803841  | 0.001351546 | 0.025788883 | dyrk3             | ZDB-GENE-080219-31   | dyrk3             |
| ENSDARG00000053554 | 7.834604333 | -1.273854405 | 0.397627577 | -3.203636965 | 0.001357035 | 0.025869801 | wdr76             | ZDB-GENE-030131-4513 | wdr76             |
| ENSDARG00000014340 | 31.27057259 | -0.580294579 | 0.181225292 | -3.202061772 | 0.001364477 | 0.025987775 | rab11al           | ZDB-GENE-031118-188  | rab11al           |
| ENSDARG00000045482 | 9.515181896 | -1.051807629 | 0.328735681 | -3.199554205 | 0.001376403 | 0.026190839 | stk38l            | ZDB-GENE-040426-798  | stk38l            |
| ENSDARG00000012248 | 120.5864754 | 0.355281972  | 0.111082417 | 3.198363705  | 0.001382098 | 0.026275087 | rgma              | ZDB-GENE-040527-1    | rgma              |
| ENSDARG00000061587 | 75.54032409 | 0.339744045  | 0.106268681 | 3.197028896  | 0.00138851  | 0.026372784 | ctdSpl2a          | ZDB-GENE-061013-647  | ctdSpl2a          |
| ENSDARG00000069186 | 7.125194929 | 1.002839145  | 0.313889444 | 3.194880127  | 0.001398889 | 0.026532919 | cyp27a1.2         | ZDB-GENE-081104-511  | cyp27a1.2         |
| ENSDARG00000045262 | 83.60650846 | -0.457277224 | 0.143133794 | -3.194753745 | 0.001399502 | 0.026532919 | gsnb              | ZDB-GENE-030131-8567 | gsnb              |
| ENSDARG00000044601 | 1236.869207 | -0.280627526 | 0.087852509 | -3.194302911 | 0.00140169  | 0.026550102 | rtn4a             | ZDB-GENE-030710-1    | rtn4a             |
| ENSDARG00000078654 | 62.02567951 | -0.837729295 | 0.262338353 | -3.193316136 | 0.001406489 | 0.026616676 | tpx2              | ZDB-GENE-030131-9652 | tpx2              |
| ENSDARG00000020759 | 290.9686438 | 0.304614744  | 0.095409907 | 3.192695118  | 0.001409517 | 0.026649642 | elf1              | ZDB-GENE-980526-335  | elf1              |
| ENSDARG00000053575 | 1.268407183 | -3.420161596 | 1.071592725 | -3.191661828 | 0.001414568 | 0.026720772 | gpat2             | ZDB-GENE-050309-118  | gpat2             |
| ENSDARG00000013457 | 87.2007264  | -0.527022962 | 0.165141481 | -3.191342098 | 0.001416135 | 0.026726    | mtrex             | ZDB-GENE-040426-2854 | mtrex             |
| ENSDARG00000114424 | 8.991263018 | -1.38847876  | 0.43516433  | -3.190699842 | 0.001419286 | 0.026734787 | CABZ01046087.1    |                      |                   |
| ENSDARG00000022000 | 21.74508125 | 0.679020967  | 0.212819913 | 3.190589433  | 0.001419829 | 0.026734787 | traf3             | ZDB-GENE-040801-257  | traf3             |
| ENSDARG00000036065 | 88.7313785  | 0.485306007  | 0.152136796 | 3.189931825  | 0.001423064 | 0.026734787 | mgat1b            | ZDB-GENE-061103-589  | mgat1b            |



|                    |             |              |             |              |             |             |                  |                      |                  |
|--------------------|-------------|--------------|-------------|--------------|-------------|-------------|------------------|----------------------|------------------|
| ENSDARG00000077461 | 9.895344184 | -1.19932849  | 0.375998204 | -3.189718664 | 0.001424114 | 0.026734787 | dhx32a           | ZDB-GENE-130613-6    | dhx32a           |
| ENSDARG00000062042 | 19.87380545 | 0.97063416   | 0.304310891 | 3.189613611  | 0.001424631 | 0.026734787 | mthfsd           | ZDB-GENE-030131-3513 | mthfsd           |
| ENSDARG00000037491 | 1.159150839 | -4.035838326 | 1.265359216 | -3.189480327 | 0.001425288 | 0.026734787 | bmp15            | ZDB-GENE-030131-6115 | bmp15            |
| ENSDARG00000078221 | 14.80978429 | 0.678138665  | 0.212621931 | 3.189410721  | 0.001425632 | 0.026734787 | si:ch211-204d2.4 | ZDB-GENE-081105-163  | si:ch211-204d2.4 |
| ENSDARG00000060319 | 32.20234789 | -0.822436706 | 0.258017304 | -3.18752538  | 0.001434959 | 0.026885364 | scn4bb           | ZDB-GENE-031116-71   | scn4bb           |
| ENSDARG00000006848 | 110.5762657 | 0.650430946  | 0.2041419   | 3.186170725  | 0.001441695 | 0.026987175 | parp9            | ZDB-GENE-081104-179  | parp9            |
| ENSDARG00000037378 | 21.32061657 | -0.641132752 | 0.201247889 | -3.185786225 | 0.001443612 | 0.026998676 | qdpbr1           | ZDB-GENE-050522-320  | qdpbr1           |
| ENSDARG00000071437 | 125.3659767 | 0.525774491  | 0.165118793 | 3.184219565  | 0.001451449 | 0.027120758 | ptprc            | ZDB-GENE-050208-585  | ptprc            |
| ENSDARG00000040190 | 399.2388644 | 0.572595811  | 0.17986013  | 3.183561646  | 0.001454751 | 0.027157979 | qdpra            | ZDB-GENE-070705-197  | qdpra            |
| ENSDARG00000043406 | 13.77075732 | -1.069677043 | 0.33617723  | -3.181884281 | 0.001463203 | 0.027291166 | slc8a1b          | ZDB-GENE-060110-3    | slc8a1b          |
| ENSDARG00000079553 | 10.09266768 | 1.218797758  | 0.383093554 | 3.181462458  | 0.001465335 | 0.027306362 | cd83             | ZDB-GENE-060503-762  | cd83             |
| ENSDARG00000014041 | 48.03563413 | -0.722657004 | 0.227195403 | -3.180773006 | 0.001468827 | 0.027345276 | smarcad1a        | ZDB-GENE-050522-499  | smarcad1a        |
| ENSDARG00000033380 | 6.860424321 | -0.980955695 | 0.308436158 | -3.180417308 | 0.001470631 | 0.027345276 | gyg2             | ZDB-GENE-080723-74   | gyg2             |
| ENSDARG00000091650 | 39.84860268 | 0.938257857  | 0.295024653 | 3.180269338  | 0.001471382 | 0.027345276 | igflr1           | ZDB-GENE-121211-3    | igflr1           |
| ENSDARG00000061242 | 186.1663469 | -0.552659446 | 0.173845624 | -3.179024195 | 0.001477718 | 0.027438408 | tuft1a           | ZDB-GENE-061103-184  | tuft1a           |
| ENSDARG00000062929 | 107.4252572 | -0.39733122  | 0.125007565 | -3.178457393 | 0.00148061  | 0.027467498 | FAM83G           | ZDB-GENE-121214-254  | si:dkeyp-9d4.4   |
| ENSDARG00000067805 | 222.5567342 | -0.357234363 | 0.112410064 | -3.177957102 | 0.001483167 | 0.027490327 | ggcx             | ZDB-GENE-030826-27   | ggcx             |
| ENSDARG00000111939 | 435.5936979 | 0.286105012  | 0.090037958 | 3.177604412  | 0.001484972 | 0.027499188 | atf4a            | ZDB-GENE-040426-2340 | atf4a            |
| ENSDARG00000029432 | 1.679065962 | -2.73517999  | 0.86092973  | -3.177007244 | 0.001488033 | 0.027531271 | tph1a            | ZDB-GENE-030317-1    | tph1a            |
| ENSDARG00000099949 | 2.708740793 | 1.653114867  | 0.520635765 | 3.175184989  | 0.00149741  | 0.027673844 | FP236551.1       |                      |                  |
| ENSDARG00000002353 | 10.35447874 | 0.937321649  | 0.295220228 | 3.174991282  | 0.00149841  | 0.027673844 | tagapa           | ZDB-GENE-040426-1877 | tagapa           |
| ENSDARG00000040298 | 3006.951036 | -0.430018842 | 0.135468451 | -3.174309889 | 0.001501932 | 0.027714198 | apoa4b.1         | ZDB-GENE-030131-1263 | apoa4b.1         |
| ENSDARG00000011371 | 140.4107802 | -0.543398723 | 0.17125528  | -3.173033397 | 0.001508552 | 0.027811573 | zgc:64106        | ZDB-GENE-040426-1370 | zgc:64106        |
| ENSDARG00000101609 | 8.728020552 | 0.986173577  | 0.310828528 | 3.172725437  | 0.001510153 | 0.027816341 | si:dkey-109a10.2 | ZDB-GENE-141212-404  | si:dkey-109a10.2 |
| ENSDARG00000010267 | 796.498326  | -0.465404879 | 0.146806634 | -3.17018971  | 0.001523394 | 0.028035328 | dpydb            | ZDB-GENE-040426-2459 | dpydb            |
| ENSDARG00000068822 | 256.1897315 | -0.290637058 | 0.09170208  | -3.169361677 | 0.001527742 | 0.028090382 | purba            | ZDB-GENE-060531-100  | purba            |
| ENSDARG00000045139 | 1.113282894 | -2.954030367 | 0.932259327 | -3.1686788   | 0.001531335 | 0.028131497 | ca7              | ZDB-GENE-040426-1786 | ca7              |
| ENSDARG00000043884 | 27.03751904 | -0.682247854 | 0.215355131 | -3.168013004 | 0.001534847 | 0.028171028 | nup43            | ZDB-GENE-040426-2533 | nup43            |
| ENSDARG00000021339 | 29760.06605 | 0.622922602  | 0.196672957 | 3.16730175   | 0.001538606 | 0.028215034 | cpa5             | ZDB-GENE-020514-1    | cpa5             |
| ENSDARG00000021787 | 173.4913099 | -0.832866045 | 0.263013194 | -3.16663219  | 0.001542152 | 0.028237123 | abcb5            | ZDB-GENE-030131-6414 | abcb5            |
| ENSDARG00000055792 | 151.6604012 | 0.479031232  | 0.15127812  | 3.166559917  | 0.001542536 | 0.028237123 | foxo4            | ZDB-GENE-150311-1    | foxo4            |
| ENSDARG00000028173 | 100.8387394 | -0.586721028 | 0.185340978 | -3.165630366 | 0.001547473 | 0.028302503 | slc4a2a          | ZDB-GENE-051101-2    | slc4a2a          |
| ENSDARG00000012513 | 560.5678191 | 0.392629846  | 0.124074981 | 3.164456217  | 0.00155373  | 0.028391888 | sdcbp2           | ZDB-GENE-030131-3727 | sdcbp2           |
| ENSDARG00000104672 | 253.7173272 | 0.443051292  | 0.140080095 | 3.162842605  | 0.001562368 | 0.028524568 | CABZ01074397.1   |                      |                  |
| ENSDARG00000101482 | 49.99405733 | -0.654908182 | 0.20709047  | -3.16242549  | 0.001564608 | 0.028540317 | hk2              | ZDB-GENE-040426-2017 | hk2              |
| ENSDARG00000018478 | 1006.943139 | -0.599546734 | 0.189607617 | -3.162039283 | 0.001566684 | 0.028553062 | agxtb            | ZDB-GENE-010302-3    | agxtb            |
| ENSDARG00000061800 | 23.04962276 | 0.732111976  | 0.231606076 | 3.161096023  | 0.001571767 | 0.028620519 | si:dkey-208k22.6 | ZDB-GENE-070912-433  | si:dkey-208k22.6 |
| ENSDARG00000090428 | 36745.48595 | 0.639950637  | 0.202483328 | 3.160510272  | 0.001574931 | 0.028643946 | ctrb1            | ZDB-GENE-030131-1171 | ctrb1            |
| ENSDARG00000060395 | 32.66701246 | 0.615518535  | 0.194763011 | 3.160346171  | 0.001575818 | 0.028643946 | si:dkey-57k2.7   | ZDB-GENE-070912-559  | si:dkey-57k2.7   |
| ENSDARG00000013749 | 145.5108635 | 0.763139642  | 0.24190393  | 3.154721969  | 0.001606511 | 0.029166722 | slc25a55b        | ZDB-GENE-040801-184  | slc25a55b        |
| ENSDARG00000009594 | 404.0589549 | 0.416840306  | 0.132138891 | 3.154561862  | 0.001607393 | 0.029166722 | nr1d2b           | ZDB-GENE-990415-244  | nr1d2b           |
| ENSDARG00000018145 | 322.3943321 | -0.700475339 | 0.222105433 | -3.15379651  | 0.001611614 | 0.029217733 | mid1ip1l         | ZDB-GENE-030131-1697 | mid1ip1l         |
| ENSDARG00000094753 | 11.05679459 | -1.075578241 | 0.341126566 | -3.153018111 | 0.001615918 | 0.029270148 | si:dkey-71d15.2  | ZDB-GENE-050309-272  | si:dkey-71d15.2  |
| ENSDARG00000026871 | 50.50735117 | -0.59381779  | 0.188385087 | -3.152148604 | 0.001620738 | 0.029331813 | uchl1            | ZDB-GENE-030131-3844 | uchl1            |
| ENSDARG00000020136 | 14.93633033 | -0.78382541  | 0.24900629  | -3.147813695 | 0.001644965 | 0.029744297 | ptges            | ZDB-GENE-050407-2    | ptges            |
| ENSDARG00000027978 | 66.83640997 | 0.403643405  | 0.128266366 | 3.146915414  | 0.001650027 | 0.029809814 | yy1b             | ZDB-GENE-040426-2127 | yy1b             |

|                    |             |              |             |              |             |             |                   |                      |                   |
|--------------------|-------------|--------------|-------------|--------------|-------------|-------------|-------------------|----------------------|-------------------|
| ENSDARG00000110496 | 22.59244054 | 0.728365845  | 0.231491167 | 3.146408806  | 0.001652888 | 0.029835492 | zgc:162989        | ZDB-GENE-070410-123  | zgc:162989        |
| ENSDARG00000093957 | 13.40271049 | 1.047182123  | 0.332910917 | 3.14553254   | 0.001657848 | 0.029895129 | si:dkey-251i10.2  | ZDB-GENE-050506-102  | si:dkey-251i10.2  |
| ENSDARG00000033501 | 8.08042004  | -1.030134432 | 0.327513849 | -3.145315645 | 0.001659077 | 0.029895129 | zgc:64189         | ZDB-GENE-040426-1397 | zgc:64189         |
| ENSDARG00000033182 | 83.66549514 | -0.540072468 | 0.171845912 | -3.142771694 | 0.001673563 | 0.030129953 | arl4ab            | ZDB-GENE-030219-167  | arl4ab            |
| ENSDARG00000029995 | 8993.102577 | -0.48490998  | 0.154324291 | -3.142149405 | 0.001677124 | 0.030167856 | tnni2b.2          | ZDB-GENE-040801-9    | tnni2b.2          |
| ENSDARG00000018106 | 39.49473435 | -0.529169274 | 0.168433542 | -3.141709599 | 0.001679645 | 0.030187001 | EIF2B3            | ZDB-GENE-040426-1039 | EIF2B3            |
| ENSDARG00000105034 | 6.62278708  | -1.356109087 | 0.431774614 | -3.140780034 | 0.001684985 | 0.03025673  | zdhhc18b          | ZDB-GENE-030131-6315 | zdhhc18b          |
| ENSDARG00000024815 | 103.93235   | 0.869347448  | 0.276893795 | 3.139642209  | 0.001691543 | 0.030348184 | ogfrl2            | ZDB-GENE-030616-523  | ogfrl2            |
| ENSDARG00000067848 | 533.7652226 | -0.435084214 | 0.13866162  | -3.137740746 | 0.001702554 | 0.03051931  | nmrk2             | ZDB-GENE-040912-44   | nmrk2             |
| ENSDARG00000055566 | 19.00351125 | -0.910140691 | 0.290143824 | -3.136860463 | 0.001707674 | 0.030569626 | mastl             | ZDB-GENE-040801-128  | mastl             |
| ENSDARG00000098206 | 17.41542252 | -0.889414339 | 0.283546362 | -3.136751018 | 0.001708311 | 0.030569626 | ptrh1             | ZDB-GENE-050306-33   | ptrh1             |
| ENSDARG00000034852 | 65.4810669  | -0.737833853 | 0.235284865 | -3.135917199 | 0.001713176 | 0.030605716 | nt5c2l1           | ZDB-GENE-031006-8    | nt5c2l1           |
| ENSDARG00000091754 | 14.41693791 | -0.938559369 | 0.299295154 | -3.135898984 | 0.001713282 | 0.030605716 | CT573476.1        |                      |                   |
| ENSDARG00000026611 | 59.49659818 | 0.603851597  | 0.192661283 | 3.134265415  | 0.001722849 | 0.030750118 | socs3b            | ZDB-GENE-040426-2528 | socs3b            |
| ENSDARG00000102068 | 33.40189508 | -0.759292839 | 0.242283721 | -3.133899524 | 0.001724999 | 0.030751618 | shcbp1            | ZDB-GENE-030131-5865 | shcbp1            |
| ENSDARG00000019231 | 1837.395954 | 0.337398755  | 0.107666272 | 3.133746044  | 0.001725902 | 0.030751618 | sptan1            | ZDB-GENE-051113-60   | sptan1            |
| ENSDARG00000076313 | 399.6145748 | 0.732758391  | 0.233848875 | 3.133469815  | 0.001727527 | 0.030754134 | si:ch211-240l19.7 | ZDB-GENE-041210-329  | si:ch211-240l19.7 |
| ENSDARG00000103642 | 2103.626207 | 1.280386421  | 0.408688297 | 3.132916774  | 0.001730785 | 0.03078569  | pglyrp6           | ZDB-GENE-071227-2    | pglyrp6           |
| ENSDARG00000037640 | 16.22149806 | -0.992776999 | 0.316989874 | -3.131888685 | 0.001736857 | 0.030867199 | aurkb             | ZDB-GENE-020419-40   | aurkb             |
| ENSDARG00000042688 | 4.429223209 | -1.874406668 | 0.598710782 | -3.130738119 | 0.001743676 | 0.030961824 | bora              | ZDB-GENE-041114-165  | bora              |
| ENSDARG00000063155 | 62.35412068 | 0.408048807  | 0.130365361 | 3.130040088  | 0.001747824 | 0.030994086 | dcaf12            | ZDB-GENE-061013-363  | dcaf12            |
| ENSDARG00000087805 | 53.9261726  | 0.594308358  | 0.189880451 | 3.12990808   | 0.00174861  | 0.030994086 | FP236735.1        |                      |                   |
| ENSDARG00000097017 | 103.1399148 | 0.333548434  | 0.106582395 | 3.129489011  | 0.001751106 | 0.030994086 | mical3a           | ZDB-GENE-050126-2    | mical3a           |
| ENSDARG00000098754 | 21.41123876 | 0.775180043  | 0.247706697 | 3.129427065  | 0.001751475 | 0.030994086 | si:ch211-156p11.1 | ZDB-GENE-070912-120  | si:ch211-156p11.1 |
| ENSDARG00000042213 | 6.538810301 | -1.526431078 | 0.487862978 | -3.128811054 | 0.001755151 | 0.031032633 | si:ch211-233h19.2 | ZDB-GENE-061009-14   | si:ch211-233h19.2 |
| ENSDARG00000070109 | 55.62611439 | -0.611401852 | 0.195531898 | -3.126865012 | 0.00176681  | 0.031212142 | ncapg             | ZDB-GENE-041111-282  | ncapg             |
| ENSDARG00000007693 | 252.6128494 | -0.526446546 | 0.168402865 | -3.126113944 | 0.001771329 | 0.031248426 | nfkbiab           | ZDB-GENE-030131-1819 | nfkbiab           |
| ENSDARG00000019963 | 62.95647025 | -0.660908191 | 0.211426521 | -3.125947435 | 0.001772332 | 0.031248426 | sfxn1             | ZDB-GENE-040801-45   | sfxn1             |
| ENSDARG00000059483 | 122.0859015 | 0.424209966  | 0.13571365  | 3.125772285  | 0.001773388 | 0.031248426 | tead1b            | ZDB-GENE-091013-5    | tead1b            |
| ENSDARG00000109658 | 1.995977698 | -1.754018443 | 0.561333161 | -3.124736904 | 0.001779642 | 0.031331973 | CR792453.2        |                      |                   |
| ENSDARG00000044811 | 93.10199102 | 0.355181942  | 0.113701738 | 3.123803994  | 0.001785293 | 0.031404796 | cdk9              | ZDB-GENE-030131-321  | cdk9              |
| ENSDARG00000109628 | 4.437594282 | 1.595746798  | 0.510937246 | 3.123175716  | 0.001789109 | 0.031435119 | CR944667.2        |                      |                   |
| ENSDARG00000087457 | 16.3552979  | 0.7523573    | 0.240906915 | 3.123020771  | 0.001790051 | 0.031435119 | ecscr             | ZDB-GENE-050411-37   | ecscr             |
| ENSDARG00000061221 | 2.250625296 | -2.499080746 | 0.800294743 | -3.122700441 | 0.001792    | 0.031442702 | si:ch211-157j23.2 | ZDB-GENE-030131-5686 | si:ch211-157j23.2 |
| ENSDARG00000005980 | 141.5143093 | 0.495866997  | 0.158844324 | 3.121716816  | 0.001797998 | 0.031521247 | sfswap            | ZDB-GENE-040426-931  | sfswap            |
| ENSDARG00000044485 | 3.821111697 | -2.172253072 | 0.696011046 | -3.121003732 | 0.001802357 | 0.031570965 | sall4             | ZDB-GENE-060328-2    | sall4             |
| ENSDARG00000060235 | 93.25073582 | 0.588592144  | 0.188611993 | 3.12065067   | 0.00180452  | 0.031582141 | mst1ra            | ZDB-GENE-071218-2    | mst1ra            |
| ENSDARG00000095918 | 19.30520773 | 0.780284606  | 0.250129288 | 3.119525158  | 0.001811428 | 0.031676295 | si:ch211-274k16.9 | ZDB-GENE-110408-30   | si:ch211-274k16.9 |
| ENSDARG00000069471 | 127.7924473 | 0.540743037  | 0.173423408 | 3.118051031  | 0.001820513 | 0.031808319 | mhc1zca           | ZDB-GENE-070424-4    | mhc1zca           |
| ENSDARG00000103856 | 92.91729594 | -0.431136183 | 0.138390886 | -3.115350982 | 0.001837262 | 0.032073912 | ptcd3             | ZDB-GENE-030131-6849 | ptcd3             |
| ENSDARG00000090946 | 54.02791692 | 0.527819862  | 0.169456863 | 3.114774175  | 0.001840858 | 0.03208953  | si:zfos-364h11.2  | ZDB-GENE-120703-46   | si:zfos-364h11.2  |
| ENSDARG00000078825 | 10.28174555 | -0.977298888 | 0.31376874  | -3.11471081  | 0.001841253 | 0.03208953  | bub1ba            | ZDB-GENE-041014-120  | bub1ba            |
| ENSDARG00000062799 | 49.37782159 | -0.472000288 | 0.151578786 | -3.113894107 | 0.001846357 | 0.032143885 | baiap2a           | ZDB-GENE-060421-2756 | baiap2a           |
| ENSDARG00000052575 | 18.91084019 | 1.031865052  | 0.331393477 | 3.11371564   | 0.001847475 | 0.032143885 | arl13a            | ZDB-GENE-040426-1790 | arl13a            |
| ENSDARG00000026225 | 59.3162993  | -0.571540775 | 0.183578147 | -3.113337746 | 0.001849842 | 0.032151955 | nsd2              | ZDB-GENE-030131-2581 | nsd2              |
| ENSDARG00000011785 | 20.92896845 | 1.90355173   | 0.611455892 | 3.113146435  | 0.001851042 | 0.032151955 | tbx6              | ZDB-GENE-020416-5    | tbx6              |

|                    |             |              |             |              |             |             |                   |                      |                   |
|--------------------|-------------|--------------|-------------|--------------|-------------|-------------|-------------------|----------------------|-------------------|
| ENSDARG00000113834 | 1.725502027 | -2.506281816 | 0.805541389 | -3.111301108 | 0.001862649 | 0.032326477 | BX537305.1        |                      |                   |
| ENSDARG00000056767 | 58.53739491 | -0.474039136 | 0.152381213 | -3.110876507 | 0.001865329 | 0.032345903 | itgb3a            | ZDB-GENE-071207-1    | itgb3a            |
| ENSDARG00000061585 | 234.3299964 | 0.675600757  | 0.217247676 | 3.109818103  | 0.001872026 | 0.032434883 | cyp4v7            | ZDB-GENE-061103-88   | cyp4v7            |
| ENSDARG00000102171 | 117.5403531 | 0.364500778  | 0.117230611 | 3.109262801  | 0.001875548 | 0.032468762 | fnip1             | ZDB-GENE-030131-3586 | fnip1             |
| ENSDARG00000070669 | 29.73997299 | 0.676336294  | 0.217591375 | 3.108286314  | 0.001881757 | 0.03254739  | cxcr3.3           | ZDB-GENE-100922-34   | cxcr3.3           |
| ENSDARG00000056929 | 372.8878709 | 0.297856939  | 0.095833876 | 3.108054807  | 0.001883231 | 0.03254739  | kdm6bb            | ZDB-GENE-040724-166  | kdm6bb            |
| ENSDARG00000069433 | 66.57972954 | 0.411248882  | 0.132382439 | 3.106521421  | 0.001893026 | 0.032689403 | tnk1              | ZDB-GENE-030131-7427 | tnk1              |
| ENSDARG00000061757 | 174.3073638 | 0.296220011  | 0.095369631 | 3.106020322  | 0.001896237 | 0.032717585 | rabgap1l          | ZDB-GENE-050208-389  | rabgap1l          |
| ENSDARG00000040610 | 39.04576636 | 0.52725378   | 0.169787389 | 3.10537658   | 0.001900369 | 0.032761604 | si:ch73-352p4.8   | ZDB-GENE-140106-36   | si:ch73-352p4.8   |
| ENSDARG00000068840 | 1.965008413 | -5.675370304 | 1.828157419 | -3.104421012 | 0.001906518 | 0.032840292 | zgc:66024         | ZDB-GENE-040426-1511 | zgc:66024         |
| ENSDARG00000025043 | 4.589823382 | -1.320176909 | 0.425326871 | -3.103911364 | 0.001909805 | 0.03286959  | trip13            | ZDB-GENE-040426-1488 | trip13            |
| ENSDARG00000031044 | 28.91753756 | -1.15906515  | 0.37349845  | -3.10326629  | 0.001913973 | 0.032913989 | lipg              | ZDB-GENE-040426-699  | lipg              |
| ENSDARG00000022509 | 65.20961358 | 0.477472988  | 0.153908193 | 3.102323385  | 0.001920081 | 0.032991637 | cox4i2            | ZDB-GENE-040426-1775 | cox4i2            |
| ENSDARG00000039162 | 167.4037987 | -0.320422009 | 0.103330256 | -3.100950515 | 0.001929005 | 0.03311752  | rhebl1            | ZDB-GENE-000510-1    | rhebl1            |
| ENSDARG00000101892 | 30.955085   | -0.602320985 | 0.194314952 | -3.099715063 | 0.001937069 | 0.033228429 | ino80e            | ZDB-GENE-040426-1818 | ino80e            |
| ENSDARG00000056725 | 305.5644085 | 0.496040798  | 0.16007816  | 3.098741244  | 0.001943447 | 0.033305445 | hmgb3a            | ZDB-GENE-050428-1    | hmgb3a            |
| ENSDARG00000077231 | 48.76436083 | 0.717492605  | 0.231558352 | 3.098539089  | 0.001944773 | 0.033305445 | vwf               | ZDB-GENE-070103-1    | vwf               |
| ENSDARG00000016343 | 91.88575339 | 0.429972408  | 0.138789514 | 3.098017976  | 0.001948196 | 0.033336515 | zgc:92518         | ZDB-GENE-040718-53   | zgc:92518         |
| ENSDARG00000059234 | 55.5662375  | -0.4936827   | 0.159415649 | -3.096827084 | 0.001956039 | 0.033443109 | mrps27            | ZDB-GENE-040808-39   | mrps27            |
| ENSDARG00000100055 | 20.55702217 | 0.743743062  | 0.240200682 | 3.096340338  | 0.001959253 | 0.033470445 | tox2              | ZDB-GENE-040426-2095 | tox2              |
| ENSDARG00000056795 | 72.3316185  | -0.558221232 | 0.180390411 | -3.094517209 | 0.001971335 | 0.033649097 | serpine1          | ZDB-GENE-070912-60   | serpine1          |
| ENSDARG00000011932 | 110.8207858 | 0.308565727  | 0.099739198 | 3.093725771  | 0.001976601 | 0.033711214 | prkcbp1l          | ZDB-GENE-030131-2199 | prkcbp1l          |
| ENSDARG00000043175 | 736.2395396 | 0.75760638   | 0.245016214 | 3.092066303  | 0.001987684 | 0.033867753 | CELA1 (1 of many) | ZDB-GENE-050522-187  | zgc:112368        |
| ENSDARG00000104205 | 121.2924659 | 0.592154197  | 0.19152021  | 3.091862721  | 0.001989048 | 0.033867753 | cfhl3             | ZDB-GENE-050208-423  | cfhl3             |
| ENSDARG00000104581 | 23.04766547 | -0.803103398 | 0.259802235 | -3.091210503 | 0.001993423 | 0.033899271 | tom1              | ZDB-GENE-060721-1    | tom1              |
| ENSDARG00000027249 | 1532.794341 | 0.571534343  | 0.184896806 | 3.091099051  | 0.001994171 | 0.033899271 | btg1              | ZDB-GENE-010726-1    | btg1              |
| ENSDARG00000036787 | 30.65706605 | 0.91114448   | 0.294796291 | 3.090759647  | 0.001996452 | 0.033910223 | tap2a             | ZDB-GENE-030616-245  | tap2a             |
| ENSDARG00000025420 | 26.90343349 | 0.635185554  | 0.205632638 | 3.088933545  | 0.002008764 | 0.034066785 | fzd5              | ZDB-GENE-990415-218  | fzd5              |
| ENSDARG00000100716 | 3.831954787 | -1.652876076 | 0.535129956 | -3.088737715 | 0.002010088 | 0.034066785 | si:dkey-285b23.4  | ZDB-GENE-131127-34   | si:dkey-285b23.4  |
| ENSDARG00000025608 | 20.24264526 | 0.66620279   | 0.215693014 | 3.088661885  | 0.002010601 | 0.034066785 | casp6l1           | ZDB-GENE-041010-48   | casp6l1           |
| ENSDARG00000057830 | 6.377902412 | -1.473024723 | 0.477040863 | -3.087837617 | 0.002016186 | 0.034133503 | dnmt3bb.2         | ZDB-GENE-990712-11   | dnmt3bb.2         |
| ENSDARG00000078448 | 50.71240147 | 0.698732566  | 0.226340693 | 3.087083266  | 0.00202131  | 0.03419231  | gpr137ba          | ZDB-GENE-100721-1    | gpr137ba          |
| ENSDARG00000031809 | 40.4966195  | -0.506661056 | 0.164187069 | -3.085876742 | 0.002029529 | 0.03430335  | rbm24b            | ZDB-GENE-060312-43   | rbm24b            |
| ENSDARG00000028784 | 13.42114618 | -1.058506767 | 0.343133269 | -3.084826979 | 0.002036706 | 0.034396594 | si:dkey-24p1.6    | ZDB-GENE-060503-67   | si:dkey-24p1.6    |
| ENSDARG00000091678 | 36.19853215 | -0.563846138 | 0.182966347 | -3.081693157 | 0.002058269 | 0.034732449 | ints12            | ZDB-GENE-040625-178  | ints12            |
| ENSDARG00000068387 | 240.2880273 | 0.738610382  | 0.239712107 | 3.081239371  | 0.002061409 | 0.034757126 | slc6a18           | ZDB-GENE-080219-9    | slc6a18           |
| ENSDARG00000092651 | 11.73108897 | -1.142037763 | 0.371027123 | -3.078043874 | 0.002083642 | 0.035103445 | si:dkey-57a22.11  | ZDB-GENE-081104-423  | si:dkey-57a22.11  |
| ENSDARG00000057737 | 70.70295445 | 0.443660423  | 0.144171532 | 3.077309491  | 0.002088783 | 0.035161465 | rxraa             | ZDB-GENE-070314-2    | rxraa             |
| ENSDARG00000068749 | 64.13939871 | 0.635714256  | 0.206612109 | 3.076848985  | 0.002092013 | 0.035187244 | si:ch211-250k18.5 | ZDB-GENE-070912-244  | si:ch211-250k18.5 |
| ENSDARG00000092445 | 3.747132153 | -1.511644341 | 0.491526182 | -3.075409604 | 0.002102136 | 0.035328849 | zgc:153352        | ZDB-GENE-060929-1142 | zgc:153352        |
| ENSDARG00000012060 | 22.23008281 | 0.692965262  | 0.225451025 | 3.073684233  | 0.002114331 | 0.035504996 | thbs3b            | ZDB-GENE-060503-84   | thbs3b            |
| ENSDARG00000035676 | 357.5988401 | -0.274767749 | 0.089406488 | -3.073241716 | 0.002117469 | 0.035525349 | ptp4a2b           | ZDB-GENE-041114-111  | ptp4a2b           |
| ENSDARG00000094879 | 8.908673184 | -0.9252478   | 0.301086482 | -3.073030023 | 0.002118972 | 0.035525349 | si:dkey-277m11.2  | ZDB-GENE-060526-285  | si:dkey-277m11.2  |
| ENSDARG00000073961 | 3.342613513 | -1.819051137 | 0.59203967  | -3.072515624 | 0.002122627 | 0.035557867 | si:ch211-160j14.2 | ZDB-GENE-091118-113  | si:ch211-160j14.2 |
| ENSDARG00000035669 | 10.29713344 | -1.315366181 | 0.428191816 | -3.071908736 | 0.002126947 | 0.035601458 | sox3              | ZDB-GENE-980526-333  | sox3              |
| ENSDARG00000030176 | 67.71886735 | 0.535094693  | 0.174222346 | 3.071332142  | 0.002131059 | 0.035608224 | zgc:92429         | ZDB-GENE-040801-194  | zgc:92429         |

|                     |             |              |             |              |             |             |                 |                      |                 |
|---------------------|-------------|--------------|-------------|--------------|-------------|-------------|-----------------|----------------------|-----------------|
| ENSDARG00000098024  | 967.5811268 | -0.437891573 | 0.142579172 | -3.071216983 | 0.002131882 | 0.035608224 | si:dkey-262k9.2 | ZDB-GENE-131121-282  | si:dkey-262k9.2 |
| ENSDARG00000098414  | 19.10683734 | -0.855805371 | 0.278661446 | -3.071129444 | 0.002132507 | 0.035608224 | ninl            | ZDB-GENE-130530-768  | ninl            |
| ENSDARG00000008395  | 34.44150731 | -0.539472432 | 0.175739175 | -3.069733502 | 0.002142499 | 0.035691776 | snupn           | ZDB-GENE-030131-3464 | snupn           |
| ENSDARG00000069917  | 10.75209005 | -1.10243475  | 0.35913518  | -3.069693007 | 0.002142789 | 0.035691776 | ska3            | ZDB-GENE-030131-2997 | ska3            |
| ENSDARG00000030125  | 19.57491713 | 0.820681433  | 0.267349816 | 3.06969141   | 0.0021428   | 0.035691776 | sox7            | ZDB-GENE-040109-4    | sox7            |
| ENSDARG00000004105  | 91.02328325 | 0.359769998  | 0.117212624 | 3.069379279  | 0.002145041 | 0.035691776 | tie1            | ZDB-GENE-990415-55   | tie1            |
| ENSDARG00000007823  | 69.5699399  | 0.759951802  | 0.247603514 | 3.069228661  | 0.002146123 | 0.035691776 | atf3            | ZDB-GENE-040426-728  | atf3            |
| ENSDARG000000101900 | 174.2101223 | -0.303118351 | 0.098864492 | -3.06599816  | 0.002169447 | 0.036027142 | xrn2            | ZDB-GENE-040426-2874 | xrn2            |
| ENSDARG00000005104  | 140.5162141 | -0.346041297 | 0.112865773 | -3.065954251 | 0.002169765 | 0.036027142 | limk2           | ZDB-GENE-040718-398  | limk2           |
| ENSDARG00000011581  | 406.6303085 | 0.713779654  | 0.23285     | 3.065405421  | 0.002173751 | 0.036064429 | si:dkey-23k10.5 | ZDB-GENE-030131-4787 | si:dkey-23k10.5 |
| ENSDARG000000031763 | 45.2204771  | 0.470894565  | 0.153632551 | 3.065070281  | 0.002176189 | 0.036075983 | smad6b          | ZDB-GENE-050419-198  | smad6b          |
| ENSDARG00000099411  | 23.29858028 | 0.712707431  | 0.232546149 | 3.064799969  | 0.002178156 | 0.036079739 | zgc:158343      | ZDB-GENE-061201-9    | zgc:158343      |
| ENSDARG00000090192  | 8.942692718 | 0.967578931  | 0.315754921 | 3.064335236  | 0.002181543 | 0.036106977 | si:dkey-16p6.1  | ZDB-GENE-081103-43   | si:dkey-16p6.1  |
| ENSDARG00000067796  | 157.598912  | -0.331773138 | 0.108293459 | -3.063648896 | 0.002186554 | 0.036161025 | clpxb           | ZDB-GENE-130404-1    | clpxb           |
| ENSDARG00000041959  | 51.59083009 | -0.696444594 | 0.22754748  | -3.060656147 | 0.002208526 | 0.03649527  | cxcr4b          | ZDB-GENE-010614-1    | cxcr4b          |
| ENSDARG00000019808  | 212.9613834 | -0.811799058 | 0.265276186 | -3.060203293 | 0.002211868 | 0.036521377 | evpla           | ZDB-GENE-030829-19   | evpla           |
| ENSDARG000000112234 | 210.1378009 | -0.51378697  | 0.167932527 | -3.059484538 | 0.002217182 | 0.036579978 | endouc          | ZDB-GENE-060503-141  | endouc          |
| ENSDARG00000009544  | 107.0205051 | -0.591530529 | 0.193366895 | -3.059109618 | 0.002219959 | 0.036596652 | cldnb           | ZDB-GENE-010328-2    | cldnb           |
| ENSDARG00000044956  | 1.741988917 | -6.033606336 | 1.972901968 | -3.058239301 | 0.002226417 | 0.036652005 | zgc:114123      | ZDB-GENE-050913-53   | zgc:114123      |
| ENSDARG00000004937  | 16.24008236 | -1.382468682 | 0.452055952 | -3.058180466 | 0.002226854 | 0.036652005 | skp2            | ZDB-GENE-030219-158  | skp2            |
| ENSDARG00000021405  | 170.1936977 | 0.364705074  | 0.119308643 | 3.056820245  | 0.002236984 | 0.036789507 | chd3            | ZDB-GENE-121031-4    | chd3            |
| ENSDARG00000092872  | 43.1242304  | -0.611036036 | 0.199950543 | -3.05593587  | 0.002243592 | 0.03686893  | upk3b           | ZDB-GENE-060526-348  | upk3b           |
| ENSDARG00000090903  | 94.82860882 | -0.678016344 | 0.222178192 | -3.051678196 | 0.002275659 | 0.037366253 | creb3l3b        | ZDB-GENE-131023-1    | creb3l3b        |
| ENSDARG00000087277  | 93.04012231 | 0.437639481  | 0.143434213 | 3.051151266  | 0.002279657 | 0.037402258 | selenoj         | ZDB-GENE-030131-4163 | selenoj         |
| ENSDARG00000053992  | 16.50283527 | -0.924461691 | 0.30304183  | -3.050607541 | 0.002283789 | 0.037440404 | sfi1            | ZDB-GENE-080206-4    | sfi1            |
| ENSDARG00000010316  | 183.5680513 | -0.554061702 | 0.181724598 | -3.04890867  | 0.002296743 | 0.037599155 | qars            | ZDB-GENE-040426-1011 | qars            |
| ENSDARG00000045601  | 7.278157738 | -1.550445511 | 0.508532562 | -3.048861817 | 0.002297101 | 0.037599155 | cax1            | ZDB-GENE-030131-3044 | cax1            |
| ENSDARG000000095047 | 3.391519622 | -1.600001025 | 0.524956027 | -3.047876284 | 0.002304648 | 0.037692907 | si:dkey-85k15.4 | ZDB-GENE-100922-242  | si:dkey-85k15.4 |
| ENSDARG00000060211  | 1.918706529 | -1.930132257 | 0.633460974 | -3.046963169 | 0.00231166  | 0.03777778  | ankef1b         | ZDB-GENE-060810-68   | ankef1b         |
| ENSDARG00000003421  | 91.48461009 | -0.402040574 | 0.132043421 | -3.044760353 | 0.002328658 | 0.037914612 | igf2bp2a        | ZDB-GENE-070912-44   | igf2bp2a        |
| ENSDARG00000088140  | 95.03316852 | -0.927384001 | 0.304607397 | -3.044522263 | 0.002330502 | 0.037914612 | hsd17b7         | ZDB-GENE-061013-378  | hsd17b7         |
| ENSDARG000000105499 | 8.933914054 | -7.716542954 | 2.534583011 | -3.044501964 | 0.002330659 | 0.037914612 | zgc:175135      | ZDB-GENE-080214-1    | zgc:175135      |
| ENSDARG00000071592  | 192.5464429 | 0.791116784  | 0.259857053 | 3.044430681  | 0.002331211 | 0.037914612 | aqp8a.2         | ZDB-GENE-070112-1802 | aqp8a.2         |
| ENSDARG00000014994  | 37.98071927 | -0.599839606 | 0.197046745 | -3.044148766 | 0.002333397 | 0.037914612 | tbp             | ZDB-GENE-030616-563  | tbp             |
| ENSDARG000000104120 | 22.20209103 | 0.573446356  | 0.188379044 | 3.044109061  | 0.002333705 | 0.037914612 | LO018260.1      |                      |                 |
| ENSDARG00000015449  | 169.6173559 | 0.305155631  | 0.100246632 | 3.0440487    | 0.002334174 | 0.037914612 | fut8a           | ZDB-GENE-031118-20   | fut8a           |
| ENSDARG00000010571  | 102.2789184 | -0.480487493 | 0.157848199 | -3.043984633 | 0.002334671 | 0.037914612 | ezh2            | ZDB-GENE-041111-259  | ezh2            |
| ENSDARG00000022378  | 23.76654425 | 0.591202009  | 0.194242409 | 3.043629922  | 0.002337425 | 0.037929615 | mtmr1b          | ZDB-GENE-050327-48   | mtmr1b          |
| ENSDARG000000101306 | 66.6107616  | -0.403870734 | 0.132733    | -3.042730407 | 0.002344423 | 0.038013401 | mrpl15          | ZDB-GENE-040801-168  | mrpl15          |
| ENSDARG00000001354  | 81.42389514 | -0.667908712 | 0.219573132 | -3.041850821 | 0.002351284 | 0.038094844 | slc6a22.2       | ZDB-GENE-030616-628  | slc6a22.2       |
| ENSDARG00000002377  | 68.1808661  | -0.37321222  | 0.122741799 | -3.040628556 | 0.002360849 | 0.038219929 | mief2           | ZDB-GENE-060929-864  | mief2           |
| ENSDARG00000063895  | 10317.81768 | -0.36343895  | 0.119540213 | -3.040307036 | 0.002363371 | 0.03823089  | mt-nd1          | ZDB-GENE-011205-7    | mt-nd1          |
| ENSDARG00000074501  | 25.1891203  | 0.741205032  | 0.243851168 | 3.039579579  | 0.002369086 | 0.038292189 | tnip2           | ZDB-GENE-120913-2    | tnip2           |
| ENSDARG00000030278  | 172.8868987 | -0.383946714 | 0.12632508  | -3.039354616 | 0.002370856 | 0.038292189 | idh3a           | ZDB-GENE-040426-1007 | idh3a           |
| ENSDARG00000026712  | 635.1364475 | 0.208664604  | 0.068671835 | 3.038576201  | 0.00237699  | 0.038361357 | rab5c           | ZDB-GENE-031118-30   | rab5c           |
| ENSDARG000000101670 | 45.40729716 | -0.643321578 | 0.21194623  | -3.03530559  | 0.002402921 | 0.038741403 | kntc1           | ZDB-GENE-050208-92   | kntc1           |

|                    |             |              |             |              |             |             |                   |                      |                   |
|--------------------|-------------|--------------|-------------|--------------|-------------|-------------|-------------------|----------------------|-------------------|
| ENSDARG00000099996 | 142.2646391 | -0.384460922 | 0.126670109 | -3.035135333 | 0.002404278 | 0.038741403 | rhot1a            | ZDB-GENE-030131-5354 | rhot1a            |
| ENSDARG00000076017 | 16.42160149 | -0.743035709 | 0.244908286 | -3.033934539 | 0.002413868 | 0.038865713 | tmem69            | ZDB-GENE-081022-98   | tmem69            |
| ENSDARG00000011000 | 125.0668467 | -0.388563566 | 0.128090517 | -3.03350768  | 0.002417286 | 0.038890522 | gtf2a1            | ZDB-GENE-030131-2694 | gtf2a1            |
| ENSDARG00000035942 | 2.230329592 | 2.066824389  | 0.681661054 | 3.032041184  | 0.002429061 | 0.039049646 | hrh3              | ZDB-GENE-040724-204  | hrh3              |
| ENSDARG00000097902 | 15.55670486 | -0.854182263 | 0.281834823 | -3.03079036  | 0.002439145 | 0.039150402 | si:ch73-204p21.2  | ZDB-GENE-050208-49   | si:ch73-204p21.2  |
| ENSDARG00000091967 | 17.10097636 | -0.779749054 | 0.257307718 | -3.030414554 | 0.002442183 | 0.039150402 | ttf1              | ZDB-GENE-030131-6913 | ttf1              |
| ENSDARG00000033444 | 30.61494944 | -0.625722271 | 0.206488748 | -3.030297191 | 0.002443132 | 0.039150402 | map4k6            | ZDB-GENE-060512-339  | map4k6            |
| ENSDARG00000062868 | 120.1023162 | 0.46555605   | 0.153635498 | 3.030263544  | 0.002443404 | 0.039150402 | eea1              | ZDB-GENE-041111-270  | eea1              |
| ENSDARG00000055395 | 30.12858386 | 0.73746306   | 0.243379581 | 3.03009421   | 0.002444775 | 0.039150402 | foxq1b            | ZDB-GENE-040426-2090 | foxq1b            |
| ENSDARG00000040465 | 83.43223022 | 0.574461496  | 0.189685094 | 3.028500997  | 0.002457703 | 0.039327038 | irf2              | ZDB-GENE-041212-38   | irf2              |
| ENSDARG00000011564 | 413.2317811 | 0.36674849   | 0.121297775 | 3.02353848   | 0.002498373 | 0.039924951 | sfpq              | ZDB-GENE-040426-2452 | sfpq              |
| ENSDARG00000043249 | 148.5354744 | 1.103369289  | 0.364958678 | 3.023271824  | 0.002500575 | 0.039924951 | irf1b             | ZDB-GENE-041114-13   | irf1b             |
| ENSDARG00000051711 | 13.36204825 | 0.952104891  | 0.314928782 | 3.023238734  | 0.002500849 | 0.039924951 | CR339041.2        |                      |                   |
| ENSDARG00000017427 | 133.8737125 | 0.533424734  | 0.176483847 | 3.022513067  | 0.002506853 | 0.039989992 | phf20l1           | ZDB-GENE-030131-5837 | phf20l1           |
| ENSDARG00000076920 | 60.36746226 | -0.421291592 | 0.139443838 | -3.021227743 | 0.002517519 | 0.040129257 | ZNF335            | ZDB-GENE-141211-7    | si:ch211-269m15.3 |
| ENSDARG00000100426 | 8.792352551 | -0.814590481 | 0.269691673 | -3.020450987 | 0.002523986 | 0.040201405 | fam167b           | ZDB-GENE-131121-390  | fam167b           |
| ENSDARG00000101910 | 48.44434149 | 0.543531611  | 0.180049003 | 3.018798221  | 0.002537795 | 0.040390312 | pcdh20            | ZDB-GENE-091204-115  | pcdh20            |
| ENSDARG00000079618 | 22.00599595 | 0.698691493  | 0.231470693 | 3.018487934  | 0.002540395 | 0.040400667 | sik2a             | ZDB-GENE-070705-451  | sik2a             |
| ENSDARG00000073771 | 36.13050585 | -0.566250801 | 0.187624331 | -3.018003044 | 0.002544463 | 0.040434335 | tbc1d12b          | ZDB-GENE-121214-108  | tbc1d12b          |
| ENSDARG00000069744 | 2.35429704  | -3.025906596 | 1.002871305 | -3.017243172 | 0.002550851 | 0.040454694 | mos               | ZDB-GENE-040428-3    | mos               |
| ENSDARG00000086616 | 9.847502332 | 0.874106072  | 0.289717394 | 3.017099045  | 0.002552064 | 0.040454694 | cabz01093075.1    | ZDB-GENE-160113-9    | cabz01093075.1    |
| ENSDARG00000095741 | 8.069407564 | -8.735224082 | 2.89530593  | -3.017029734 | 0.002552648 | 0.040454694 | ddx41             | ZDB-GENE-030131-1927 | ddx41             |
| ENSDARG00000042684 | 1398.716342 | -0.390253025 | 0.129354688 | -3.016922168 | 0.002553554 | 0.040454694 | serpinc1          | ZDB-GENE-030131-264  | serpinc1          |
| ENSDARG00000077473 | 172.0126919 | -0.622204871 | 0.206274111 | -3.01639827  | 0.00255797  | 0.040493706 | mych              | ZDB-GENE-030219-51   | mych              |
| ENSDARG00000004754 | 156.892146  | -0.694928471 | 0.230452143 | -3.015500145 | 0.002565558 | 0.040582822 | hspa4a            | ZDB-GENE-040426-2832 | hspa4a            |
| ENSDARG00000057855 | 124.1318551 | -0.418773778 | 0.138907398 | -3.014769435 | 0.002571747 | 0.040649684 | mrps31            | ZDB-GENE-030131-3715 | mrps31            |
| ENSDARG00000045789 | 8.327489645 | -1.338506704 | 0.444077693 | -3.014127314 | 0.002577196 | 0.040704773 | srgap1b           | ZDB-GENE-041210-103  | srgap1b           |
| ENSDARG00000043457 | 8660.890259 | -0.387440328 | 0.128577288 | -3.013287437 | 0.00258434  | 0.040726477 | gapdh             | ZDB-GENE-030115-1    | gapdh             |
| ENSDARG00000100558 | 28.62444618 | -0.909027358 | 0.301688084 | -3.01313643  | 0.002585626 | 0.040726477 | slbp              | ZDB-GENE-030131-9686 | slbp              |
| ENSDARG00000058533 | 45.64661315 | -0.558222869 | 0.185265057 | -3.013103917 | 0.002585904 | 0.040726477 | pole              | ZDB-GENE-070705-557  | pole              |
| ENSDARG00000087094 | 2.75298835  | -2.082543959 | 0.691176566 | -3.013041906 | 0.002586432 | 0.040726477 | foxa              | ZDB-GENE-990415-76   | foxa              |
| ENSDARG00000002002 | 14.54156107 | -0.748673133 | 0.248506635 | -3.012688707 | 0.002589444 | 0.040742943 | lmcd1             | ZDB-GENE-040426-1067 | lmcd1             |
| ENSDARG00000006299 | 20.99910351 | -0.594842097 | 0.197498896 | -3.011875563 | 0.00259639  | 0.040821241 | arhgef7a          | ZDB-GENE-060322-11   | arhgef7a          |
| ENSDARG00000077883 | 13.3653048  | -0.881761576 | 0.292857132 | -3.010893294 | 0.002604804 | 0.040922474 | fam83d            | ZDB-GENE-041111-264  | fam83d            |
| ENSDARG00000052332 | 10.32361949 | 1.038372577  | 0.344932068 | 3.010368339  | 0.00260931  | 0.040954809 | ftr98             | ZDB-GENE-081105-171  | ftr98             |
| ENSDARG00000014273 | 15.23357531 | 1.077423032  | 0.357924865 | 3.010193304  | 0.002610815 | 0.040954809 | camk2d2           | ZDB-GENE-040718-277  | camk2d2           |
| ENSDARG00000057323 | 30.26055968 | -0.663419093 | 0.220472693 | -3.009076025 | 0.002620435 | 0.04107463  | e2f8              | ZDB-GENE-041111-260  | e2f8              |
| ENSDARG00000079980 | 182.5305281 | 0.635774554  | 0.211367286 | 3.0079137    | 0.002630478 | 0.041200885 | si:ch211-202h22.9 | ZDB-GENE-030131-1143 | si:ch211-202h22.9 |
| ENSDARG00000087375 | 4.096472349 | -1.346823198 | 0.447855831 | -3.007269537 | 0.002636059 | 0.041257114 | zgc:66473         | ZDB-GENE-030131-5708 | zgc:66473         |
| ENSDARG00000060315 | 52.0388827  | 0.712352131  | 0.236908408 | 3.006867242  | 0.00263955  | 0.041280572 | rabgap1l2         | ZDB-GENE-070912-414  | rabgap1l2         |
| ENSDARG00000042877 | 8.138553455 | 0.958073698  | 0.318706908 | 3.006127805  | 0.002645978 | 0.041349885 | heca              | ZDB-GENE-041001-173  | heca              |
| ENSDARG00000008127 | 6.182839675 | -1.113623902 | 0.370550481 | -3.005323047 | 0.002652989 | 0.041413249 | pcdh15b           | ZDB-GENE-050214-1    | pcdh15b           |
| ENSDARG00000019763 | 48.95424928 | -1.319622828 | 0.439112587 | -3.005203831 | 0.002654029 | 0.041413249 | acp5a             | ZDB-GENE-040426-2864 | acp5a             |
| ENSDARG00000071691 | 436.515435  | -0.406130282 | 0.135173149 | -3.004518909 | 0.002660012 | 0.041450793 | uqcr2b            | ZDB-GENE-030131-1269 | uqcr2b            |
| ENSDARG00000029482 | 1.876907469 | -2.495479004 | 0.830588633 | -3.004470452 | 0.002660436 | 0.041450793 | ush2a             | ZDB-GENE-060503-794  | ush2a             |
| ENSDARG00000053636 | 28.76319489 | 0.720429006  | 0.239819295 | 3.004049383  | 0.002664121 | 0.041477018 | cracr2b           | ZDB-GENE-061215-136  | cracr2b           |

|                     |             |              |             |              |             |             |                    |                      |                    |
|---------------------|-------------|--------------|-------------|--------------|-------------|-------------|--------------------|----------------------|--------------------|
| ENSDARG00000070145  | 66.02778119 | 0.602143263  | 0.200508111 | 3.003086804  | 0.002672562 | 0.041577198 | magi1a             | ZDB-GENE-081105-13   | magi1a             |
| ENSDARG00000042336  | 5.061368173 | -1.093894522 | 0.364460007 | -3.001411681 | 0.00268731  | 0.041775269 | impdh1a            | ZDB-GENE-040704-15   | impdh1a            |
| ENSDARG00000028533  | 804.4685944 | 0.23345229   | 0.07781578  | 3.000063621  | 0.002699232 | 0.041929153 | macf1a             | ZDB-GENE-030131-3606 | macf1a             |
| ENSDARG00000075354  | 31.95644437 | -0.788376471 | 0.262822037 | -2.999658928 | 0.002702821 | 0.041953447 | espl1              | ZDB-GENE-030131-5188 | espl1              |
| ENSDARG00000021455  | 100.1836306 | 0.373998294  | 0.124697561 | 2.999243065  | 0.002706513 | 0.041957107 | strbp              | ZDB-GENE-030729-18   | strbp              |
| ENSDARG00000079889  | 80.96011539 | 0.395955001  | 0.132021249 | 2.999176305  | 0.002707106 | 0.041957107 | phldb2a            | ZDB-GENE-091118-9    | phldb2a            |
| ENSDARG00000041991  | 52.21147372 | -0.659488592 | 0.219956227 | -2.99827198  | 0.002715152 | 0.042050366 | rrp9               | ZDB-GENE-060427-1    | rrp9               |
| ENSDARG000000101938 | 2.900856585 | 1.622899773  | 0.541380876 | 2.997704285  | 0.002720215 | 0.042067369 | CABZ01060492.1     |                      |                    |
| ENSDARG00000078349  | 193.4461066 | 0.630518264  | 0.210334462 | 2.99769356   | 0.002720311 | 0.042067369 | zmp:0000000845     | ZDB-GENE-130530-848  | zmp:0000000845     |
| ENSDARG00000051729  | 34.93764498 | 0.561080251  | 0.187214247 | 2.996995471  | 0.002726548 | 0.042132379 | nfatc3b            | ZDB-GENE-100922-25   | nfatc3b            |
| ENSDARG00000070846  | 36.00390971 | -0.589785949 | 0.196841969 | -2.996240854 | 0.002733305 | 0.042205317 | dazap1             | ZDB-GENE-070212-1    | dazap1             |
| ENSDARG00000099577  | 41.39510055 | 0.59462514   | 0.198512915 | 2.995397749  | 0.002740872 | 0.042260203 | si:dkey-182g1.10   | ZDB-GENE-141216-134  | si:dkey-182g1.10   |
| ENSDARG000000101979 | 284.0368821 | 0.460878654  | 0.153862633 | 2.995390404  | 0.002740938 | 0.042260203 | eps8l3a            | ZDB-GENE-091204-460  | eps8l3a            |
| ENSDARG00000037998  | 348.7839763 | 0.202646695  | 0.067659756 | 2.995084608  | 0.002743687 | 0.042271143 | flot1b             | ZDB-GENE-020430-2    | flot1b             |
| ENSDARG00000079274  | 41462.52624 | 0.641862002  | 0.214365101 | 2.994246733  | 0.002751234 | 0.042338614 | prss59.1           | ZDB-GENE-030131-1173 | prss59.1           |
| ENSDARG00000006266  | 474.465615  | 0.497007984  | 0.165998273 | 2.994055142  | 0.002752962 | 0.042338614 | stat1a             | ZDB-GENE-980526-499  | stat1a             |
| ENSDARG00000012274  | 132.8922333 | -0.670748585 | 0.224037031 | -2.993918384 | 0.002754196 | 0.042338614 | eif4e1c            | ZDB-GENE-050417-398  | eif4e1c            |
| ENSDARG00000089821  | 21.52288675 | 0.6644458    | 0.221988896 | 2.993148818  | 0.002761151 | 0.042383036 | si:dkey-9k7.3      | ZDB-GENE-160728-12   | si:dkey-9k7.3      |
| ENSDARG00000068856  | 10.82201838 | -0.91256284  | 0.304884174 | -2.993145977 | 0.002761176 | 0.042383036 | f2rl1.1            | ZDB-GENE-061215-140  | f2rl1.1            |
| ENSDARG00000098540  | 89.09199539 | 0.386032084  | 0.128996455 | 2.992579009  | 0.002766311 | 0.042430412 | zc3h7ba            | ZDB-GENE-030131-4512 | zc3h7ba            |
| ENSDARG000000103785 | 209.2652776 | -0.690123246 | 0.230772752 | -2.990488435 | 0.002785317 | 0.042690336 | sult2st2           | ZDB-GENE-061117-5    | sult2st2           |
| ENSDARG00000030107  | 291.8482929 | -0.473392243 | 0.158374445 | -2.989069623 | 0.002798284 | 0.042756558 | si:ch211-207i1.2   | ZDB-GENE-041014-149  | si:ch211-207i1.2   |
| ENSDARG000000104890 | 6.462597021 | 1.083629642  | 0.362540849 | 2.988986328  | 0.002799047 | 0.042756558 | si:ch211-76m11.3   | ZDB-GENE-041210-276  | si:ch211-76m11.3   |
| ENSDARG00000043561  | 87.45469911 | -0.400972054 | 0.134159928 | -2.988761687 | 0.002801105 | 0.042756558 | psmc1b             | ZDB-GENE-040625-69   | psmc1b             |
| ENSDARG00000089871  | 153.7096658 | 0.385957261  | 0.129136228 | 2.988760523  | 0.002801116 | 0.042756558 | jcada              | ZDB-GENE-111221-2    | jcada              |
| ENSDARG00000056144  | 29.44104168 | 0.669925832  | 0.224155199 | 2.988669619  | 0.002801949 | 0.042756558 | zgc:123244         | ZDB-GENE-051113-144  | zgc:123244         |
| ENSDARG00000054127  | 12.27241872 | -0.99111796  | 0.331645876 | -2.988482694 | 0.002803664 | 0.042756558 | slc26a6l           | ZDB-GENE-080220-10   | slc26a6l           |
| ENSDARG00000021346  | 390.9313259 | -0.340582602 | 0.113970071 | -2.988351234 | 0.00280487  | 0.042756558 | pdhb               | ZDB-GENE-040426-2173 | pdhb               |
| ENSDARG00000042033  | 9.775863727 | 0.911991364  | 0.305196293 | 2.988212453  | 0.002806144 | 0.042756558 | mettl11b           | ZDB-GENE-081104-175  | mettl11b           |
| ENSDARG000000103529 | 10.70092922 | -0.801424057 | 0.268252005 | -2.987579002 | 0.002811966 | 0.042813785 | snx1b              | ZDB-GENE-050913-82   | snx1b              |
| ENSDARG00000098772  | 11.07584421 | 1.073588048  | 0.359417776 | 2.987019892  | 0.002817114 | 0.042860672 | gig2d              | ZDB-GENE-130517-1    | gig2d              |
| ENSDARG00000045914  | 126.2050405 | -0.418281352 | 0.140068842 | -2.986255527 | 0.002824165 | 0.042936432 | si:ch211-51e12.7   | ZDB-GENE-030131-8279 | si:ch211-51e12.7   |
| ENSDARG00000061013  | 191.1449445 | 0.265369905  | 0.088876205 | 2.98583749   | 0.002828029 | 0.042963647 | ankfy1             | ZDB-GENE-041222-1    | ankfy1             |
| ENSDARG00000062319  | 8.264678449 | -1.053077123 | 0.35279893  | -2.98492153  | 0.002836511 | 0.043041043 | si:dkey-103g5.3    | ZDB-GENE-131127-337  | si:dkey-103g5.3    |
| ENSDARG00000062385  | 48.34922271 | 0.44379933   | 0.148684519 | 2.984838854  | 0.002837278 | 0.043041043 | flcn               | ZDB-GENE-060421-3470 | flcn               |
| ENSDARG0000005394   | 81.29595299 | 0.460166945  | 0.154204908 | 2.984126457  | 0.002843892 | 0.04310176  | dnmt3aa            | ZDB-GENE-050314-5    | dnmt3aa            |
| ENSDARG00000031138  | 6.833853044 | -0.923149917 | 0.309408141 | -2.983599312 | 0.002848796 | 0.04310176  | irx3b              | ZDB-GENE-030131-525  | irx3b              |
| ENSDARG00000006921  | 339.1314571 | 0.356772595  | 0.119588793 | 2.983328016  | 0.002851322 | 0.04310176  | lrp5               | ZDB-GENE-050518-2    | lrp5               |
| ENSDARG000000105806 | 6.073564351 | 1.064563586  | 0.356850555 | 2.983219642  | 0.002852332 | 0.04310176  | CABZ01069020.1     |                      |                    |
| ENSDARG00000074036  | 17.71700584 | 0.991017137  | 0.332199384 | 2.983199807  | 0.002852517 | 0.04310176  | ky                 | ZDB-GENE-090313-64   | ky                 |
| ENSDARG00000016065  | 26.87681647 | 0.493814535  | 0.16555361  | 2.982775868  | 0.002856471 | 0.04310176  | tlr3               | ZDB-GENE-040219-7    | tlr3               |
| ENSDARG00000021172  | 1019.110312 | 0.564857799  | 0.189390471 | 2.982503794  | 0.002859011 | 0.04310176  | cyp2ad2            | ZDB-GENE-020812-2    | cyp2ad2            |
| ENSDARG00000039007  | 3661.598659 | -0.389323358 | 0.130538612 | -2.982438323 | 0.002859623 | 0.04310176  | eno3               | ZDB-GENE-031006-5    | eno3               |
| ENSDARG00000089943  | 1.416881236 | 2.610386294  | 0.875296607 | 2.982287688  | 0.00286103  | 0.04310176  | npy2rl             | ZDB-GENE-111115-4    | npy2rl             |
| ENSDARG000000102912 | 3.606569513 | 1.269877089  | 0.425850047 | 2.981981798  | 0.00286389  | 0.04310176  | gpr184             | ZDB-GENE-060929-1218 | gpr184             |
| ENSDARG00000088234  | 26.23816423 | 1.230878295  | 0.412820114 | 2.98163353   | 0.00286715  | 0.04310176  | si:ch211-217k17.12 | ZDB-GENE-061207-20   | si:ch211-217k17.12 |

|                    |             |              |             |              |             |             |                    |                      |                  |
|--------------------|-------------|--------------|-------------|--------------|-------------|-------------|--------------------|----------------------|------------------|
| ENSDARG0000004318  | 37.05693883 | -0.587286779 | 0.196972629 | -2.981565427 | 0.002867788 | 0.04310176  | cbwd               | ZDB-GENE-040426-2388 | cbwd             |
| ENSDARG00000059035 | 2149.101813 | -0.388188421 | 0.130198659 | -2.981508591 | 0.00286832  | 0.04310176  | porb               | ZDB-GENE-030131-5767 | porb             |
| ENSDARG00000088571 | 14.05537434 | 0.688135498  | 0.230841923 | 2.980981487  | 0.002873262 | 0.04314473  | soga3a             | ZDB-GENE-100921-84   | soga3a           |
| ENSDARG00000076501 | 102.8347036 | 0.330363055  | 0.110880049 | 2.979463451  | 0.002887537 | 0.043327688 | asxl2              | ZDB-GENE-100412-1    | asxl2            |
| ENSDARG00000035985 | 130.2205843 | -0.525975979 | 0.176572403 | -2.978811914 | 0.002893683 | 0.043388501 | fam210aa           | ZDB-GENE-030131-5627 | fam210aa         |
| ENSDARG00000098932 | 93.26224299 | 0.475047519  | 0.15949596  | 2.978429789  | 0.002897294 | 0.043411227 | gigyf1a            | ZDB-GENE-050809-79   | gigyf1a          |
| ENSDARG00000060695 | 107.6850591 | -0.465657925 | 0.156373372 | -2.977859465 | 0.00290269  | 0.043435986 | znf346             | ZDB-GENE-070209-152  | znf346           |
| ENSDARG00000103739 | 88.55557896 | 0.433700718  | 0.145658812 | 2.97751103   | 0.002905992 | 0.043435986 | bahcc1a            | ZDB-GENE-170301-1    | bahcc1a          |
| ENSDARG00000100019 | 20.88606821 | -0.829328039 | 0.278542824 | -2.97738074  | 0.002907227 | 0.043435986 | arhgap11a          | ZDB-GENE-040426-2562 | arhgap11a        |
| ENSDARG00000096310 | 25.53604682 | -0.581775053 | 0.195411325 | -2.977181857 | 0.002909114 | 0.043435986 | wu:rfj64h06        | ZDB-GENE-030131-8286 | wu:rfj64h06      |
| ENSDARG00000087745 | 11.56209494 | 1.132142418  | 0.380277397 | 2.977148859  | 0.002909427 | 0.043435986 | lrrc38b            | ZDB-GENE-141216-65   | lrrc38b          |
| ENSDARG00000019195 | 41.50796361 | -0.676570379 | 0.227299366 | -2.976560779 | 0.002915013 | 0.043488048 | vps9d1             | ZDB-GENE-050306-57   | vps9d1           |
| ENSDARG00000054696 | 254.4484627 | -0.400244549 | 0.13447606  | -2.976325666 | 0.002917249 | 0.043490095 | psmb4              | ZDB-GENE-050417-333  | psmb4            |
| ENSDARG00000102378 | 25.40181048 | 0.654435064  | 0.219962134 | 2.975216922  | 0.002927814 | 0.043616224 | CABZ01003056.1     |                      |                  |
| ENSDARG00000060016 | 153.3714743 | 0.285098917  | 0.095836349 | 2.974851595  | 0.002931303 | 0.043636828 | nsd1a              | ZDB-GENE-080519-3    | nsd1a            |
| ENSDARG00000088307 | 106.3765226 | 0.40394381   | 0.13580654  | 2.974406161  | 0.002935562 | 0.04366886  | mrtfba             | ZDB-GENE-130531-36   | mrtfba           |
| ENSDARG00000100904 | 10.47755689 | 1.290497433  | 0.434149249 | 2.972474179  | 0.002954101 | 0.043895086 | CABZ01109021.1     |                      |                  |
| ENSDARG00000031511 | 219.6727222 | -0.354143076 | 0.119144615 | -2.97238005  | 0.002955007 | 0.043895086 | psmb2              | ZDB-GENE-040718-353  | psmb2            |
| ENSDARG00000075053 | 71.77404883 | 1.00274407   | 0.337401561 | 2.971960376  | 0.002959049 | 0.043917751 | SCCPDH (1 of many) | ZDB-GENE-080212-12   | zgc:174379       |
| ENSDARG00000094579 | 23.95893375 | 0.610476213  | 0.205424312 | 2.971781715  | 0.002960771 | 0.043917751 | b4galnt2.1         | ZDB-GENE-030131-9081 | b4galnt2.1       |
| ENSDARG00000099767 | 8.150781153 | -1.184985857 | 0.399051993 | -2.969502415 | 0.002982825 | 0.044185506 | fhdc2              | ZDB-GENE-091118-76   | fhdc2            |
| ENSDARG00000097414 | 40.24083625 | -0.916582457 | 0.30866814  | -2.969475425 | 0.002983087 | 0.044185506 | si:ch211-106e7.2   | ZDB-GENE-031116-72   | si:ch211-106e7.2 |
| ENSDARG00000086228 | 16.44224388 | 0.710151084  | 0.239302863 | 2.967582894  | 0.003001513 | 0.044426686 | si:dkey-120c6.5    | ZDB-GENE-131121-595  | si:dkey-120c6.5  |
| ENSDARG00000021806 | 279.7479411 | 0.317633137  | 0.107062239 | 2.966808263  | 0.003009085 | 0.044506434 | zfp3612            | ZDB-GENE-030131-5873 | zfp3612          |
| ENSDARG00000005894 | 162.188521  | 0.559171114  | 0.188489352 | 2.966592587  | 0.003011197 | 0.044506434 | slc7a9             | ZDB-GENE-080116-2    | slc7a9           |
| ENSDARG00000100973 | 52.4225913  | 0.454621712  | 0.153290089 | 2.965760631  | 0.003019354 | 0.044579128 | arhgap24           | ZDB-GENE-091118-20   | arhgap24         |
| ENSDARG00000044596 | 20.39544164 | -0.620654335 | 0.209280885 | -2.965652282 | 0.003020418 | 0.044579128 | pgap2              | ZDB-GENE-050320-119  | pgap2            |
| ENSDARG00000079257 | 37.11000961 | -0.642103006 | 0.216692911 | -2.963193415 | 0.003044652 | 0.044904824 | gemin5             | ZDB-GENE-031112-9    | gemin5           |
| ENSDARG00000078882 | 33.61167647 | -0.471068917 | 0.15900656  | -2.962575371 | 0.003050771 | 0.044963071 | slc22a31           | ZDB-GENE-130530-858  | slc22a31         |
|                    | 98.74804521 | 0.400636634  | 0.135304303 | 2.961004372  | 0.003066376 | 0.045160939 | smad1              | ZDB-GENE-991119-8    | smad1            |
| ENSDARG00000015566 | 294.0020173 | 0.313795977  | 0.10598714  | 2.960698587  | 0.003069422 | 0.04517369  | dnmt3ab            | ZDB-GENE-050314-3    | dnmt3ab          |
| ENSDARG00000063624 | 113.5496226 | -0.54032285  | 0.182520774 | -2.960336168 | 0.003073035 | 0.045194773 | gfm1               | ZDB-GENE-061013-79   | gfm1             |
| ENSDARG00000006308 | 28.620221   | 0.506163445  | 0.171013982 | 2.959778145  | 0.003078607 | 0.045244599 | ptpn18             | ZDB-GENE-050320-12   | ptpn18           |
| ENSDARG00000052045 | 9.317452296 | -0.967749604 | 0.327041714 | -2.959101436 | 0.003085375 | 0.045311939 | ggt5a              | ZDB-GENE-080226-1    | ggt5a            |
| ENSDARG00000042993 | 38351.6822  | 0.587181644  | 0.19846407  | 2.958629462  | 0.003090104 | 0.045347048 | prss1              | ZDB-GENE-010131-7    | prss1            |
| ENSDARG00000086550 | 4.002746764 | -1.304599037 | 0.440977379 | -2.958426214 | 0.003092143 | 0.045347048 | dbf4b              | ZDB-GENE-121214-269  | dbf4b            |
| ENSDARG00000109946 | 5.689131776 | 1.258479639  | 0.425603564 | 2.956929277  | 0.003107194 | 0.045507177 | BX005027.2         |                      |                  |
| ENSDARG00000052638 | 153.72596   | 0.552212449  | 0.186753626 | 2.956903488  | 0.003107454 | 0.045507177 | fam210b            | ZDB-GENE-050913-122  | fam210b          |
| ENSDARG00000068367 | 72.67212042 | 0.36749117   | 0.12430258  | 2.956424307  | 0.003112286 | 0.045545758 | nfkbie             | ZDB-GENE-061215-132  | nfkbie           |
| ENSDARG00000029058 | 110.7613382 | -0.574199239 | 0.194259986 | -2.955828688 | 0.003118302 | 0.045601596 | rbbp4              | ZDB-GENE-030131-445  | rbbp4            |
| ENSDARG00000032197 | 30.44438066 | -0.574750628 | 0.194500869 | -2.955002878 | 0.003126661 | 0.045691591 | klf12b             | ZDB-GENE-071004-22   | klf12b           |
| ENSDARG00000045927 | 19.20236892 | -0.73857103  | 0.250011377 | -2.954149682 | 0.003135319 | 0.04578582  | slc25a44a          | ZDB-GENE-041114-38   | slc25a44a        |
| ENSDARG00000070824 | 242.4563942 | -0.336717887 | 0.113992589 | -2.953857706 | 0.003138287 | 0.045796885 | ndufb5             | ZDB-GENE-011010-1    | ndufb5           |
| ENSDARG00000062420 | 121.6081627 | 0.370849272  | 0.125567296 | 2.953390601  | 0.00314304  | 0.045833971 | nfia               | ZDB-GENE-050208-501  | nfia             |
| ENSDARG00000092532 | 16.25035199 | 0.826013859  | 0.279739597 | 2.952795624  | 0.003149104 | 0.045890105 | si:dkey-21e2.8     | ZDB-GENE-050208-459  | si:dkey-21e2.8   |
| ENSDARG00000034677 | 101.6277108 | -0.741765235 | 0.25126565  | -2.952115559 | 0.003156048 | 0.045938955 | scel               | ZDB-GENE-030616-15   | scel             |

|                    |             |              |             |              |             |             |                   |                      |                   |
|--------------------|-------------|--------------|-------------|--------------|-------------|-------------|-------------------|----------------------|-------------------|
| ENSDARG00000074899 | 169.4538453 | 0.237209278  | 0.080354543 | 2.9520332    | 0.00315689  | 0.045938955 | taok2a            | ZDB-GENE-030131-9416 | taok2a            |
| ENSDARG00000077688 | 408.070716  | -0.653533383 | 0.221434786 | -2.95135825  | 0.003163797 | 0.046000558 | cpo               | ZDB-GENE-070619-6    | cpo               |
| ENSDARG00000098280 | 343.7183427 | 0.411963921  | 0.139592669 | 2.951185932  | 0.003165563 | 0.046000558 | rbm5              | ZDB-GENE-030131-3022 | rbm5              |
| ENSDARG00000036171 | 222.8250503 | -0.715711006 | 0.242591057 | -2.950277779 | 0.003174883 | 0.046097003 | rnasel3           | ZDB-GENE-050809-5    | rnasel3           |
| ENSDARG00000057562 | 25.61640743 | -0.566503367 | 0.192028138 | -2.950106022 | 0.003176649 | 0.046097003 | polr3c            | ZDB-GENE-040426-992  | polr3c            |
| ENSDARG00000087393 | 5.346282055 | -1.488568906 | 0.504770922 | -2.948998926 | 0.003188051 | 0.046213886 | prf11             | ZDB-GENE-091118-97   | prf11             |
| ENSDARG00000007130 | 77.72990705 | -0.535150424 | 0.181475144 | -2.948891034 | 0.003189164 | 0.046213886 | mrto4             | ZDB-GENE-050417-142  | mrto4             |
| ENSDARG00000077523 | 34.30591044 | 0.834406583  | 0.283135085 | 2.947026447  | 0.003208458 | 0.046441401 | tdrd7b            | ZDB-GENE-150109-14   | tdrd7b            |
| ENSDARG00000040841 | 2.907971645 | -1.987960471 | 0.674596536 | -2.946888052 | 0.003209894 | 0.046441401 | adra2a            | ZDB-GENE-021010-1    | adra2a            |
| ENSDARG00000043394 | 29.15709852 | -0.562957277 | 0.191045076 | -2.946724877 | 0.003211588 | 0.046441401 | si:dkey-71h2.2    | ZDB-GENE-041014-145  | si:dkey-71h2.2    |
| ENSDARG00000053625 | 406.0298    | 0.532254961  | 0.18065604  | 2.946233962  | 0.00321669  | 0.046488274 | anxa2b            | ZDB-GENE-030131-1089 | anxa2b            |
| ENSDARG00000077028 | 10.91987228 | -0.832292563 | 0.282578162 | -2.94535345  | 0.003225859 | 0.046582756 | si:ch211-81n22.1  | ZDB-GENE-131127-633  | si:ch211-81n22.1  |
| ENSDARG00000102674 | 222.7850195 | -0.357632719 | 0.121435098 | -2.945052334 | 0.003229    | 0.046595645 | ckap5             | ZDB-GENE-051120-174  | ckap5             |
| ENSDARG00000079860 | 18.75640915 | 0.623138024  | 0.211622597 | 2.944572233  | 0.003234014 | 0.046635524 | ppp1r16b          | ZDB-GENE-131127-294  | ppp1r16b          |
| ENSDARG00000011683 | 10.74108963 | -0.8805848   | 0.299078542 | -2.944326248 | 0.003236586 | 0.046640153 | prtfdc1           | ZDB-GENE-980526-324  | prtfdc1           |
| ENSDARG00000006074 | 65.30604773 | -0.507367794 | 0.172349324 | -2.943833961 | 0.003241739 | 0.046681938 | uck2a             | ZDB-GENE-030131-7158 | uck2a             |
| ENSDARG00000059917 | 4.588057711 | -1.479839583 | 0.502879584 | -2.942731481 | 0.003253305 | 0.046815958 | ccnj              | ZDB-GENE-100721-4    | ccnj              |
| ENSDARG00000056909 | 133.9207339 | -0.581661568 | 0.197704578 | -2.942074354 | 0.003260216 | 0.046882862 | LO018309.1        |                      |                   |
| ENSDARG00000061451 | 52.41601234 | 0.426071249  | 0.144873857 | 2.940980926  | 0.003271747 | 0.047016045 | n4bp2             | ZDB-GENE-061103-451  | n4bp2             |
| ENSDARG00000102027 | 19.97629257 | 0.619737304  | 0.210755244 | 2.940554616  | 0.003276252 | 0.047048165 | si:dkey-172k15.11 | ZDB-GENE-161017-10   | si:dkey-172k15.11 |
| ENSDARG00000017010 | 13.5901869  | -0.875669205 | 0.297823629 | -2.940227436 | 0.003279714 | 0.04706526  | scamp2l           | ZDB-GENE-030131-6432 | scamp2l           |
| ENSDARG00000045692 | 49.55726688 | -0.471037032 | 0.160230895 | -2.939739134 | 0.003284887 | 0.047106868 | pphln1            | ZDB-GENE-030131-1873 | pphln1            |
| ENSDARG00000008757 | 50.01152886 | -0.410750726 | 0.139795631 | -2.93822292  | 0.003300996 | 0.047305141 | entpd6            | ZDB-GENE-050417-412  | entpd6            |
| ENSDARG00000030630 | 6.304894453 | -1.211757631 | 0.412529844 | -2.937381738 | 0.003309964 | 0.047400625 | mfsd2aa           | ZDB-GENE-041114-166  | mfsd2aa           |
| ENSDARG00000073848 | 83.93357762 | 0.390130429  | 0.132833859 | 2.936980309  | 0.003314251 | 0.047400625 | arhgef7b          | ZDB-GENE-041212-49   | arhgef7b          |
| ENSDARG00000044525 | 46.04915397 | -0.506906507 | 0.172602928 | -2.936836089 | 0.003315793 | 0.047400625 | pparda            | ZDB-GENE-990415-212  | pparda            |
| ENSDARG00000045530 | 47.71260091 | 0.638227044  | 0.217324925 | 2.936741127  | 0.003316809 | 0.047400625 | si:ch211-244b2.4  | ZDB-GENE-030131-8699 | si:ch211-244b2.4  |
| ENSDARG00000027589 | 86.88779928 | 0.376690829  | 0.128292889 | 2.936178549  | 0.00332283  | 0.047443061 | fzd7b             | ZDB-GENE-990415-229  | fzd7b             |
| ENSDARG00000042563 | 14.42582216 | -0.993293914 | 0.338333593 | -2.935841829 | 0.003326439 | 0.047443061 | mis18bp1          | ZDB-GENE-030616-151  | mis18bp1          |
| ENSDARG00000076005 | 95.72657106 | 0.31540629   | 0.107433707 | 2.935822472  | 0.003326646 | 0.047443061 | piezo2a.2         | ZDB-GENE-131119-76   | piezo2a.2         |
| ENSDARG00000079784 | 54.32874986 | 0.40546963   | 0.138195741 | 2.934024072  | 0.003345983 | 0.047686005 | si:ch211-235o23.1 | ZDB-GENE-070912-222  | si:ch211-235o23.1 |
| ENSDARG00000100825 | 412.673003  | 0.321971324  | 0.109745796 | 2.93379187   | 0.003348487 | 0.047688893 | calm3a            | ZDB-GENE-030131-5590 | calm3a            |
| ENSDARG00000073742 | 28764.19471 | 0.574834635  | 0.195998439 | 2.932853126  | 0.003358627 | 0.047739093 | prss59.2          | ZDB-GENE-110408-10   | prss59.2          |
| ENSDARG00000074575 | 233.1089673 | 0.545847634  | 0.186137058 | 2.932503813  | 0.003362408 | 0.047739093 | ppp1r9alb         | ZDB-GENE-090312-99   | ppp1r9alb         |
| ENSDARG00000079271 | 56.36081424 | -0.607493807 | 0.207162815 | -2.932446184 | 0.003363032 | 0.047739093 | dcxr              | ZDB-GENE-030131-7002 | dcxr              |
| ENSDARG00000073732 | 101.5255356 | -0.491043604 | 0.167472738 | -2.932080828 | 0.003366991 | 0.047739093 | myh14             | ZDB-GENE-100921-1    | myh14             |
| ENSDARG00000087099 | 13.23478689 | 1.105401022  | 0.377013729 | 2.93199143   | 0.00336796  | 0.047739093 | si:ch73-106k19.5  | ZDB-GENE-030131-1230 | si:ch73-106k19.5  |
| ENSDARG00000044718 | 64.77440398 | 0.397660757  | 0.135629821 | 2.931956661  | 0.003368337 | 0.047739093 | vav2              | ZDB-GENE-091204-420  | vav2              |
| ENSDARG00000100222 | 636.3942926 | 0.261711344  | 0.089265126 | 2.931843112  | 0.003369569 | 0.047739093 | utrn              | ZDB-GENE-070228-6    | utrn              |
| ENSDARG00000035559 | 164.7219599 | 0.276447225  | 0.094293869 | 2.931762446  | 0.003370445 | 0.047739093 | tp53              | ZDB-GENE-990415-270  | tp53              |
| ENSDARG00000086576 | 29.91061072 | 0.582499124  | 0.198700015 | 2.931550476  | 0.003372746 | 0.047739093 | si:cabz01069012.2 | ZDB-GENE-161017-152  | si:cabz01069012.2 |
| ENSDARG00000043301 | 11.20708765 | -0.79485757  | 0.271326186 | -2.929527675 | 0.003394776 | 0.047993649 | gtf3c6            | ZDB-GENE-040426-1009 | gtf3c6            |
| ENSDARG00000027222 | 48.85608453 | 0.487541202  | 0.16642619  | 2.929474024  | 0.003395362 | 0.047993649 | adgrg1            | ZDB-GENE-030131-3671 | adgrg1            |
| ENSDARG00000038293 | 76.88284016 | -0.62964119  | 0.214979828 | -2.928838464 | 0.003402312 | 0.048047696 | zgc:103559        | ZDB-GENE-041212-22   | zgc:103559        |
| ENSDARG00000039486 | 90.28228666 | -0.402410519 | 0.137402417 | -2.928700441 | 0.003403823 | 0.048047696 | bag3              | ZDB-GENE-040801-40   | bag3              |
| ENSDARG00000041060 | 229.1812665 | 0.622287587  | 0.212496625 | 2.928458682  | 0.003406471 | 0.048052344 | lgals9l3          | ZDB-GENE-040718-159  | lgals9l3          |



|                    |             |              |             |              |             |             |                    |                      |                    |
|--------------------|-------------|--------------|-------------|--------------|-------------|-------------|--------------------|----------------------|--------------------|
| ENSDARG00000016357 | 160.0477923 | 0.421552018  | 0.143989759 | 2.927652769  | 0.003415312 | 0.048144287 | fmo5               | ZDB-GENE-030131-6606 | fmo5               |
| ENSDARG00000087290 | 5.532842937 | 1.322478434  | 0.451956135 | 2.926121212  | 0.003432172 | 0.048349058 | si:ch211-202h22.10 | ZDB-GENE-110914-121  | si:ch211-202h22.10 |
| ENSDARG00000076176 | 37.58227362 | -0.583122694 | 0.199350623 | -2.925110972 | 0.003443334 | 0.048473348 | ptcd1              | ZDB-GENE-030131-6146 | ptcd1              |
| ENSDARG00000035918 | 152.4952868 | -0.39092982  | 0.133661428 | -2.924776613 | 0.003447036 | 0.048492515 | bzw2               | ZDB-GENE-040426-746  | bzw2               |
| ENSDARG00000052255 | 6.324157017 | 0.990335835  | 0.338647955 | 2.924381562  | 0.003451414 | 0.048518904 | trim35-3           | ZDB-GENE-070912-56   | trim35-3           |
| ENSDARG00000099747 | 15.33679261 | 0.659790171  | 0.225632159 | 2.924184983  | 0.003453594 | 0.048518904 | CABZ01111953.1     |                      |                    |
| ENSDARG00000007804 | 73.79137402 | 0.432246271  | 0.147832935 | 2.923883447  | 0.003456942 | 0.048522291 | gas6               | ZDB-GENE-030131-7773 | gas6               |
| ENSDARG00000098439 | 131.4830008 | -0.337593313 | 0.115467901 | -2.923698358 | 0.003458998 | 0.048522291 | nr1h3              | ZDB-GENE-050410-7    | nr1h3              |
| ENSDARG00000063634 | 91.56019495 | 0.596017335  | 0.203869014 | 2.923530764  | 0.00346086  | 0.048522291 | hpse               | ZDB-GENE-041111-200  | hpse               |
| ENSDARG00000003615 | 359.5433546 | 0.674892342  | 0.230879649 | 2.923134829  | 0.003465264 | 0.048551187 | slc26a3.2          | ZDB-GENE-041210-179  | slc26a3.2          |
| ENSDARG00000074764 | 6.484122883 | -8.423518838 | 2.882309465 | -2.922489392 | 0.003472454 | 0.048619055 | zgc:171426         | ZDB-GENE-080212-2    | zgc:171426         |
| ENSDARG00000040907 | 36.12543091 | -0.795248665 | 0.272133484 | -2.922274219 | 0.003474855 | 0.048619808 | gcgb               | ZDB-GENE-040712-2    | gcgb               |
| ENSDARG00000054749 | 23.785586   | 0.689281347  | 0.235981429 | 2.920913521  | 0.003490067 | 0.048799707 | lmo4b              | ZDB-GENE-030131-3570 | lmo4b              |
| ENSDARG00000004262 | 74.21316212 | -0.678999882 | 0.232496499 | -2.920473573 | 0.003494998 | 0.048807735 | cyp46a1.2          | ZDB-GENE-040426-1184 | cyp46a1.2          |
| ENSDARG00000025012 | 4.586956747 | -1.461734108 | 0.500518097 | -2.920442068 | 0.003495352 | 0.048807735 | tpi1a              | ZDB-GENE-020416-3    | tpi1a              |
| ENSDARG00000006900 | 164.5513504 | -0.545565835 | 0.186940268 | -2.918396555 | 0.003518366 | 0.049059223 | impdh2             | ZDB-GENE-030114-5    | impdh2             |
| ENSDARG00000042548 | 44.34761996 | -0.446281249 | 0.152922329 | -2.918352426 | 0.003518864 | 0.049059223 | tpd52l1            | ZDB-GENE-050522-121  | tpd52l1            |
| ENSDARG00000075123 | 54.78306768 | 0.462308858  | 0.15842587  | 2.918139941  | 0.003521263 | 0.049059223 | trafd1             | ZDB-GENE-070410-43   | trafd1             |
| ENSDARG00000034270 | 941.4814676 | -0.293631576 | 0.10063576  | -2.917765759 | 0.003525491 | 0.049059223 | ogdha              | ZDB-GENE-030131-2143 | ogdha              |
| ENSDARG00000070794 | 2.18596926  | -1.775474061 | 0.608547856 | -2.91755865  | 0.003527833 | 0.049059223 | greb1              | ZDB-GENE-070112-332  | greb1              |
| ENSDARG00000016774 | 268.099801  | 0.304285086  | 0.104299407 | 2.917419145  | 0.003529411 | 0.049059223 | plekho2            | ZDB-GENE-120406-4    | plekho2            |
| ENSDARG00000056744 | 19728.72787 | 0.683174031  | 0.234174392 | 2.91737293   | 0.003529934 | 0.049059223 | ela2               | ZDB-GENE-041117-1    | ela2               |
| ENSDARG00000021309 | 356.2814921 | -0.219048061 | 0.075121487 | -2.915917523 | 0.003546442 | 0.049255616 | rhoca              | ZDB-GENE-040426-1337 | rhoca              |
| ENSDARG00000036840 | 1102.30356  | -0.613824476 | 0.210596785 | -2.914690626 | 0.003560413 | 0.049416529 | krt15              | ZDB-GENE-040426-2931 | krt15              |
| ENSDARG00000036833 | 38.0507555  | -1.49838999  | 0.514262549 | -2.913667334 | 0.003572103 | 0.0495456   | upp2               | ZDB-GENE-040426-830  | upp2               |
| ENSDARG00000000656 | 54.26611463 | 0.550675389  | 0.189053889 | 2.912795872  | 0.003582087 | 0.049650837 | psmb9a             | ZDB-GENE-990415-140  | psmb9a             |
| ENSDARG00000099200 | 3909.789833 | -0.71691915  | 0.246246759 | -2.911385123 | 0.003598302 | 0.049842255 | zgc:123103         | ZDB-GENE-051030-105  | zgc:123103         |
| ENSDARG00000079626 | 111.121671  | 0.278211209  | 0.095594369 | 2.910330509  | 0.003610467 | 0.049977357 | elf2b              | ZDB-GENE-031215-1    | elf2b              |
| ENSDARG00000011222 | 6.636473628 | 0.899724347  | 0.309274224 | 2.909147539  | 0.003624158 | 0.050133377 | ccdc28b            | ZDB-GENE-060208-3    | ccdc28b            |
| ENSDARG00000060796 | 507.003809  | -0.304233982 | 0.104634319 | -2.907592706 | 0.003642224 | 0.050349673 | slc20a2            | ZDB-GENE-060929-828  | slc20a2            |
| ENSDARG00000102634 | 80.32921741 | -0.572385668 | 0.196886215 | -2.907190163 | 0.003646914 | 0.050380905 | parn               | ZDB-GENE-040426-880  | parn               |
| ENSDARG00000043518 | 268.7144366 | 0.524839295  | 0.180695383 | 2.904552888  | 0.003677781 | 0.050773464 | si:dkey-239i20.2   | ZDB-GENE-041001-98   | si:dkey-239i20.2   |
| ENSDARG00000063538 | 246.3183619 | 0.3102892    | 0.10685713  | 2.903776287  | 0.003686915 | 0.050865681 | kalrnb             | ZDB-GENE-060421-7244 | kalrnb             |
| ENSDARG00000016093 | 13.70643974 | -0.922576791 | 0.317760139 | -2.903374834 | 0.003691645 | 0.050897051 | qtrt2              | ZDB-GENE-060427-4    | qtrt2              |
| ENSDARG00000044490 | 2.747780465 | 1.649736612  | 0.568300304 | 2.902931076  | 0.00369688  | 0.050935336 | tlr9               | ZDB-GENE-040219-10   | tlr9               |
| ENSDARG00000002020 | 57.46854507 | 0.407018659  | 0.140224977 | 2.902611706  | 0.003700652 | 0.050944208 | rictorb            | ZDB-GENE-070810-5    | rictorb            |
| ENSDARG00000039578 | 732.855258  | -0.310374596 | 0.106935001 | -2.902460307 | 0.003702441 | 0.050944208 | pa2g4a             | ZDB-GENE-030616-161  | pa2g4a             |
| ENSDARG00000069966 | 93.54852312 | -0.798643324 | 0.275288927 | -2.901109507 | 0.003718439 | 0.051130388 | alox5b.3           | ZDB-GENE-050522-330  | alox5b.3           |
| ENSDARG00000060238 | 204.0753815 | 0.49159345   | 0.16951453  | 2.90000775   | 0.003731534 | 0.051233484 | uacab              | ZDB-GENE-030521-32   | uacab              |
| ENSDARG00000096834 | 13.91013635 | -1.239353994 | 0.427363072 | -2.900002542 | 0.003731596 | 0.051233484 | si:ch211-155k24.9  | ZDB-GENE-131127-51   | si:ch211-155k24.9  |
| ENSDARG00000013845 | 109.2576357 | 0.368031352  | 0.126915922 | 2.899804418  | 0.003733956 | 0.051233484 | ttc14              | ZDB-GENE-050327-26   | ttc14              |
| ENSDARG00000038225 | 92.31374196 | -0.336274506 | 0.115970826 | -2.899647405 | 0.003735826 | 0.051233484 | nras               | ZDB-GENE-990415-166  | nras               |
| ENSDARG00000009806 | 33.35108781 | -0.537912197 | 0.185557784 | -2.898893198 | 0.003744824 | 0.051322916 | smfn               | ZDB-GENE-040426-1709 | smfn               |
| ENSDARG00000042270 | 44.69299054 | 0.468305859  | 0.161613827 | 2.897684356  | 0.003759287 | 0.051487079 | arsa               | ZDB-GENE-050320-118  | arsa               |
| ENSDARG00000024681 | 10.40757998 | -0.954826522 | 0.329539805 | -2.897454291 | 0.003762046 | 0.051489408 | pane1              | ZDB-GENE-040611-4    | pane1              |
| ENSDARG00000105187 | 159.8986329 | -0.48500297  | 0.167407328 | -2.897143008 | 0.003765781 | 0.051489408 | gcshb              | ZDB-GENE-040718-319  | gcshb              |

|                     |             |              |             |              |             |             |                    |                      |                    |
|---------------------|-------------|--------------|-------------|--------------|-------------|-------------|--------------------|----------------------|--------------------|
| ENSDARG00000089434  | 18.32855316 | 0.963528389  | 0.332611989 | 2.896854052  | 0.003769251 | 0.051489408 | etv7               | ZDB-GENE-070209-53   | etv7               |
| ENSDARG00000056903  | 50.44512433 | -0.568153019 | 0.196130065 | -2.896817565 | 0.003769689 | 0.051489408 | mrpl13             | ZDB-GENE-050522-167  | mrpl13             |
| ENSDARG00000010425  | 54.18804907 | 0.467850063  | 0.161515012 | 2.896635166  | 0.003771881 | 0.051489408 | scara5             | ZDB-GENE-041210-258  | scara5             |
| ENSDARG000000103846 | 1300.807995 | -0.856993195 | 0.295884576 | -2.896376715 | 0.003774989 | 0.051497913 | hspsa5             | ZDB-GENE-031001-11   | hspsa5             |
| ENSDARG00000041665  | 183.3854366 | 0.510695883  | 0.176360775 | 2.895745292  | 0.003782593 | 0.051504662 | mkrn1              | ZDB-GENE-020213-1    | mkrn1              |
| ENSDARG00000058180  | 60.44774875 | 0.452471795  | 0.156256518 | 2.895698695  | 0.003783154 | 0.051504662 | exoc314            | ZDB-GENE-081028-71   | exoc314            |
| ENSDARG00000092169  | 1.115554431 | -2.269465474 | 0.783745317 | -2.89566703  | 0.003783536 | 0.051504662 | si:dkey-250k15.4   | ZDB-GENE-100922-254  | si:dkey-250k15.4   |
| ENSDARG00000056367  | 44.47741194 | -0.640872626 | 0.221345967 | -2.89534359  | 0.003787437 | 0.051504662 | mpv17i2            | ZDB-GENE-040718-306  | mpv17i2            |
| ENSDARG00000059212  | 58.36849336 | -0.379640476 | 0.131123264 | -2.895294573 | 0.003788029 | 0.051504662 | ciao1              | ZDB-GENE-040426-839  | ciao1              |
| ENSDARG00000032431  | 8.217602306 | -1.090902208 | 0.376810064 | -2.895098384 | 0.003790397 | 0.051504662 | mpv17              | ZDB-GENE-040426-1168 | mpv17              |
| ENSDARG00000043079  | 32.93895727 | 0.573039708  | 0.198018519 | 2.893869275  | 0.003805266 | 0.051672812 | MMP23B             |                      |                    |
| ENSDARG00000017775  | 359.4237635 | -0.327653398 | 0.113247473 | -2.893251296 | 0.003812761 | 0.051740691 | atp5mc3a           | ZDB-GENE-040426-857  | atp5mc3a           |
| ENSDARG00000033742  | 21.69217894 | -0.607493392 | 0.209999184 | -2.892836913 | 0.003817795 | 0.051775094 | nt5c1bb            | ZDB-GENE-030131-7205 | nt5c1bb            |
| ENSDARG00000052426  | 15.15203802 | 0.68098556   | 0.235535807 | 2.891218827  | 0.003837508 | 0.0520084   | si:ch211-256e16.3  | ZDB-GENE-131127-256  | si:ch211-256e16.3  |
| ENSDARG00000011449  | 30.98523577 | 0.692635026  | 0.239605756 | 2.890727827  | 0.003843508 | 0.052055673 | fes                | ZDB-GENE-100812-10   | fes                |
| ENSDARG00000008880  | 289.0323598 | 0.688967038  | 0.238407687 | 2.889869224  | 0.003854021 | 0.052163963 | usp28              | ZDB-GENE-041008-142  | usp28              |
| ENSDARG00000062209  | 54.125701   | -0.422643769 | 0.146329911 | -2.888293765 | 0.003873379 | 0.052391754 | mrps5              | ZDB-GENE-060929-264  | mrps5              |
| ENSDARG00000098293  | 25.84758635 | 0.658457772  | 0.228001707 | 2.887951063  | 0.003877602 | 0.052413331 | si:dkey-27i16.2    | ZDB-GENE-030131-9667 | si:dkey-27i16.2    |
| ENSDARG00000010519  | 1673.000906 | 0.492229112  | 0.170453969 | 2.887753892  | 0.003880033 | 0.052413331 | per3               | ZDB-GENE-000804-1    | per3               |
| ENSDARG00000017240  | 6.175775539 | 0.990456132  | 0.343426449 | 2.884041505  | 0.00392607  | 0.053000667 | traf5              | ZDB-GENE-071120-3    | traf5              |
| ENSDARG00000046012  | 157.4170944 | -0.527742678 | 0.183042691 | -2.883167164 | 0.003936985 | 0.053096347 | slc47a1            | ZDB-GENE-050327-20   | slc47a1            |
| ENSDARG00000033376  | 40.6024484  | -0.692959235 | 0.240411776 | -2.882384743 | 0.003946775 | 0.053096347 | chchd4a            | ZDB-GENE-040801-46   | chchd4a            |
| ENSDARG00000098650  | 30.64177242 | -0.721669538 | 0.250374488 | -2.882360508 | 0.003947079 | 0.053096347 | iqgap3             | ZDB-GENE-160226-1    | iqgap3             |
| ENSDARG00000002571  | 90.83499511 | -0.33393568  | 0.115869909 | -2.881987932 | 0.003951749 | 0.053096347 | tmod2              | ZDB-GENE-040912-185  | tmod2              |
| ENSDARG00000037783  | 149.5587853 | 0.50583489   | 0.175519127 | 2.881935991  | 0.0039524   | 0.053096347 | proza              | ZDB-GENE-061013-403  | proza              |
| ENSDARG00000092626  | 16.22289665 | 0.633172859  | 0.219708278 | 2.881879853  | 0.003953104 | 0.053096347 | zgc:174931         | ZDB-GENE-070928-43   | zgc:174931         |
| ENSDARG00000088885  | 3.610793958 | 1.346193215  | 0.467123656 | 2.881877633  | 0.003953132 | 0.053096347 | si:ch1073-340i21.3 | ZDB-GENE-030131-199  | si:ch1073-340i21.3 |
| ENSDARG00000014137  | 81.47666594 | 0.329553062  | 0.11435525  | 2.881835867  | 0.003953656 | 0.053096347 | picalmb            | ZDB-GENE-030131-6795 | picalmb            |
| ENSDARG00000074667  | 299.9742371 | 0.370580087  | 0.128653977 | 2.880440208  | 0.003971203 | 0.05329745  | akt1s1             | ZDB-GENE-030131-482  | akt1s1             |
| ENSDARG00000062132  | 430.2647552 | -0.589253366 | 0.204628605 | -2.879623629 | 0.003981502 | 0.053401085 | cyp4v8             | ZDB-GENE-061103-601  | cyp4v8             |
| ENSDARG00000060480  | 30.38299201 | 0.531744683  | 0.184696617 | 2.879016911  | 0.003989169 | 0.053446431 | ubr1               | ZDB-GENE-091110-2    | ubr1               |
| ENSDARG00000043089  | 5.638744642 | 1.123408527  | 0.39021494  | 2.878948018  | 0.003990041 | 0.053446431 | alox5b.2           | ZDB-GENE-060623-19   | alox5b.2           |
| ENSDARG000000112049 | 80.25099004 | 0.518246409  | 0.180144421 | 2.876838519  | 0.004016811 | 0.053753688 | cldn15a            | ZDB-GENE-040426-1305 | cldn15a            |
| ENSDARG00000020395  | 189.696813  | 0.375047558  | 0.130372784 | 2.876731975  | 0.004018167 | 0.053753688 | mical2b            | ZDB-GENE-061207-15   | mical2b            |
| ENSDARG00000011819  | 113.6832879 | 0.353446908  | 0.12291186  | 2.875612733  | 0.004032441 | 0.053909837 | pcnx1              | ZDB-GENE-081113-6    | pcnx1              |
| ENSDARG00000078179  | 131.4829311 | 0.336158517  | 0.116928472 | 2.874907294  | 0.004041461 | 0.053995592 | fn/dc3ba           | ZDB-GENE-070510-1    | fn/dc3ba           |
| ENSDARG00000062893  | 6.916799654 | -1.011517106 | 0.351886501 | -2.874555014 | 0.004045973 | 0.054021036 | si:dkey-103i16.6   | ZDB-GENE-061207-46   | si:dkey-103i16.6   |
| ENSDARG00000042874  | 80.5698068  | 0.714105833  | 0.248495845 | 2.873713376  | 0.004056769 | 0.054115933 | phlda2             | ZDB-GENE-050522-73   | phlda2             |
| ENSDARG00000012140  | 117.3865113 | -0.350108006 | 0.121845945 | -2.873366079 | 0.004061232 | 0.054115933 | ccnl1b             | ZDB-GENE-030131-4813 | ccnl1b             |
| ENSDARG00000037266  | 60.49443615 | -0.442284756 | 0.153944329 | -2.873017537 | 0.004065715 | 0.054115933 | myoz2b             | ZDB-GENE-040426-1853 | myoz2b             |
| ENSDARG00000018698  | 141.279949  | -0.3605842   | 0.125519461 | -2.872735411 | 0.004069348 | 0.054115933 | carm1              | ZDB-GENE-040724-77   | carm1              |
| ENSDARG00000029356  | 11.46972172 | -0.860924863 | 0.299702997 | -2.872593437 | 0.004071177 | 0.054115933 | mboat1             | ZDB-GENE-041114-98   | mboat1             |
| ENSDARG00000004871  | 6.059374097 | -1.047206193 | 0.364564899 | -2.872482226 | 0.00407261  | 0.054115933 | mst1rb             | ZDB-GENE-071218-3    | mst1rb             |
| ENSDARG0000005976   | 60.16383734 | -0.396238367 | 0.137945204 | -2.872433083 | 0.004073243 | 0.054115933 | pecr               | ZDB-GENE-050417-232  | pecr               |
| ENSDARG000000117089 | 19.06582474 | -0.769684031 | 0.267973196 | -2.872242612 | 0.004075699 | 0.054115933 | CKS2               | ZDB-GENE-040625-102  | zgc:86839          |
| ENSDARG000000100336 | 55.9845858  | 0.514513782  | 0.179137397 | 2.872174037  | 0.004076584 | 0.054115933 | pik3r6a            | ZDB-GENE-170330-1    | pik3r6a            |

|                     |             |              |             |              |             |             |                   |                      |                   |
|---------------------|-------------|--------------|-------------|--------------|-------------|-------------|-------------------|----------------------|-------------------|
| ENSDARG00000035506  | 53.51146273 | -0.498737168 | 0.173664634 | -2.871840732 | 0.004080886 | 0.054134918 | entpd2a.1         | ZDB-GENE-040724-187  | entpd2a.1         |
| ENSDARG00000093761  | 25.42518517 | 0.803620946  | 0.279845578 | 2.871658549  | 0.004083239 | 0.054134918 | si:ch211-250k18.7 | ZDB-GENE-070912-246  | si:ch211-250k18.7 |
| ENSDARG00000070543  | 4.137474399 | -1.45898152  | 0.508226441 | -2.870731237 | 0.004095235 | 0.054259252 | grin2ab           | ZDB-GENE-070424-223  | grin2ab           |
| ENSDARG00000060058  | 66.28914672 | 0.325331659  | 0.113420749 | 2.868361054  | 0.004126044 | 0.054632511 | cyl da            | ZDB-GENE-061108-2    | cyl da            |
| ENSDARG0000003035   | 824.9268698 | -0.420497768 | 0.146671779 | -2.866930307 | 0.004144743 | 0.054845057 | hs pa9            | ZDB-GENE-030828-12   | hs pa9            |
| ENSDARG00000017034  | 84.17445575 | 0.382154772  | 0.133324817 | 2.866343875  | 0.004152429 | 0.054911703 | sq or             | ZDB-GENE-050417-436  | sq or             |
| ENSDARG00000070229  | 168.3636796 | 0.49107806   | 0.171354997 | 2.865851989  | 0.004158886 | 0.054962018 | zgc:158258        | ZDB-GENE-070112-2272 | zgc:158258        |
| ENSDARG00000079402  | 15.76967666 | 0.641557136  | 0.223878955 | 2.865642891  | 0.004161634 | 0.054963277 | tap bp.1          | ZDB-GENE-010110-2    | tap bp.1          |
| ENSDARG0000002330   | 1.292463966 | -3.658536618 | 1.276816724 | -2.865357689 | 0.004165384 | 0.054977769 | lh x8a            | ZDB-GENE-031008-2    | lh x8a            |
| ENSDARG00000092976  | 427.3857406 | 0.662403876  | 0.231280570 | 2.864071363  | 0.004182338 | 0.055166393 | si:ch211-127i16.2 | ZDB-GENE-091204-54   | si:ch211-127i16.2 |
| ENSDARG00000058389  | 16.30147691 | 1.013646294  | 0.35396122  | 2.863721323  | 0.004186962 | 0.055192256 | ccl19a.1          | ZDB-GENE-060526-181  | ccl19a.1          |
| ENSDARG00000078901  | 5.391834379 | 1.135720857  | 0.396643738 | 2.863327337  | 0.004192172 | 0.055225806 | ank s1ab          | ZDB-GENE-110107-1    | ank s1ab          |
| ENSDARG00000060316  | 43.1151868  | 0.797026518  | 0.278523606 | 2.861612091  | 0.004214924 | 0.055468213 | cish              | ZDB-GENE-050907-1    | cish              |
| ENSDARG00000040705  | 133.8690063 | -0.363841521 | 0.127148997 | -2.861536707 | 0.004215927 | 0.055468213 | gl sb             | ZDB-GENE-030616-550  | gl sb             |
| ENSDARG00000075022  | 1.001643624 | -4.247624688 | 1.484926983 | -2.860493974 | 0.004229816 | 0.055615638 | si:ch211-93e11.8  | ZDB-GENE-121214-283  | si:ch211-93e11.8  |
| ENSDARG00000054211  | 15.25516398 | -0.766753387 | 0.26827128  | -2.858126993 | 0.004261498 | 0.05597702  | st8sia7.1         | ZDB-GENE-090504-4    | st8sia7.1         |
| ENSDARG00000013024  | 86.30479748 | 0.300227286  | 0.105046666 | 2.858037265  | 0.004262703 | 0.05597702  | erap1a            | ZDB-GENE-091113-7    | erap1a            |
| ENSDARG00000095783  | 29.49083547 | 0.581172821  | 0.203468136 | 2.85633334   | 0.004285649 | 0.05622982  | si:dkey-249d8.1   | ZDB-GENE-110411-157  | si:dkey-249d8.1   |
| ENSDARG00000041911  | 39.31274387 | 0.539737184  | 0.18897004  | 2.856205063  | 0.004287381 | 0.05622982  | si:ch211-245h14.1 | ZDB-GENE-041014-350  | si:ch211-245h14.1 |
| ENSDARG00000071662  | 43.3334218  | 0.438535221  | 0.153561042 | 2.855771327  | 0.004293242 | 0.056271072 | si:rp71-36a1.3    | ZDB-GENE-050208-566  | si:rp71-36a1.3    |
| ENSDARG00000055502  | 205.8998881 | 0.29547875   | 0.103481279 | 2.855383616  | 0.004298487 | 0.056274536 | cic b             | ZDB-GENE-030131-1966 | cic b             |
| ENSDARG00000058865  | 35.13066892 | -0.654468474 | 0.229207766 | -2.855350341 | 0.004298938 | 0.056274536 | endog             | ZDB-GENE-050522-402  | endog             |
| ENSDARG00000093972  | 8.954409527 | 0.783117341  | 0.274341102 | 2.854538877  | 0.004309936 | 0.056382883 | frt79             | ZDB-GENE-060126-4    | frt79             |
| ENSDARG00000086450  | 22.71819226 | 0.591991963  | 0.207478356 | 2.853270934  | 0.004327171 | 0.056572644 | tdg.2             | ZDB-GENE-131121-30   | tdg.2             |
| ENSDARG00000001888  | 84.4640887  | -0.331066665 | 0.116056528 | -2.852632862 | 0.004335868 | 0.056620764 | ppm1ba            | ZDB-GENE-991102-16   | ppm1ba            |
| ENSDARG00000063258  | 52.34984415 | 0.441451542  | 0.1547694   | 2.852317987  | 0.004340166 | 0.056620764 | rfx5              | ZDB-GENE-070717-3    | rfx5              |
| ENSDARG00000043009  | 158.7153387 | -0.363550188 | 0.12746049  | -2.852257883 | 0.004340987 | 0.056620764 | fam43a            | ZDB-GENE-030131-6098 | fam43a            |
| ENSDARG00000036684  | 43.93384533 | -0.520082779 | 0.182344447 | -2.852199707 | 0.004341781 | 0.056620764 | nuf a7            | ZDB-GENE-040801-169  | nuf a7            |
| ENSDARG00000095050  | 203.3572484 | -1.344373158 | 0.471475999 | -2.851413772 | 0.004352529 | 0.056698411 | si:dkey-7f3.14    | ZDB-GENE-100922-186  | si:dkey-7f3.14    |
| ENSDARG00000012389  | 146.7943017 | 0.45335188   | 0.15899473  | 2.85136419   | 0.004353208 | 0.056698411 | adar              | ZDB-GENE-000616-5    | adar              |
| ENSDARG00000037358  | 75.01685769 | -0.416733243 | 0.146191285 | -2.850602495 | 0.004363648 | 0.056798695 | polr3e            | ZDB-GENE-030131-8462 | polr3e            |
| ENSDARG00000029003  | 84.74916516 | -0.394152218 | 0.138285721 | -2.850274161 | 0.004368156 | 0.05681551  | eif1axa           | ZDB-GENE-041010-185  | eif1axa           |
| ENSDARG00000035887  | 96.9091452  | 0.300759576  | 0.105525637 | 2.850109075  | 0.004370424 | 0.05681551  | zgc:91944         | ZDB-GENE-040718-417  | zgc:91944         |
| ENSDARG000000100514 | 16.46171322 | -0.591423186 | 0.207557684 | -2.849440097 | 0.004379625 | 0.056897294 | cfap20            | ZDB-GENE-040426-1784 | cfap20            |
| ENSDARG00000091150  | 295.0916416 | -0.543328665 | 0.190691641 | -2.84925266  | 0.004382206 | 0.056897294 | mki67             | ZDB-GENE-030131-9771 | mki67             |
| ENSDARG00000099712  | 20.36539189 | -0.811672001 | 0.284950652 | -2.848465144 | 0.004393067 | 0.057002583 | zgc:163073        | ZDB-GENE-070410-135  | zgc:163073        |
| ENSDARG00000045039  | 4.37425518  | -1.311121933 | 0.460455098 | -2.847447966 | 0.00440713  | 0.057138501 | kcnj16            | ZDB-GENE-130603-81   | kcnj16            |
| ENSDARG00000038006  | 76.55963875 | 0.560775451  | 0.196949462 | 2.847306335  | 0.004409091 | 0.057138501 | osr2              | ZDB-GENE-050417-183  | osr2              |
| ENSDARG00000041294  | 44.08006646 | 0.651724602  | 0.22891133  | 2.847061364  | 0.004412486 | 0.057138501 | noxo1a            | ZDB-GENE-030131-9700 | noxo1a            |
| ENSDARG00000062349  | 12.39307127 | 0.710603777  | 0.2496052   | 2.846910946  | 0.004414571 | 0.057138501 | arhgap15          | ZDB-GENE-070912-314  | arhgap15          |
| ENSDARG00000074084  | 85.55417973 | -0.325075097 | 0.114199963 | -2.846542929 | 0.004419677 | 0.057168176 | strip1            | ZDB-GENE-040426-2927 | strip1            |
| ENSDARG00000095863  | 2784.729137 | -0.729913538 | 0.2564386   | -2.846348162 | 0.004422381 | 0.057168176 | afp4              | ZDB-GENE-030131-5217 | afp4              |
| ENSDARG00000005800  | 100.9499364 | -0.600480209 | 0.210992654 | -2.845976847 | 0.004427541 | 0.057199197 | ampd3a            | ZDB-GENE-110407-2    | ampd3a            |
| ENSDARG00000099493  | 3.341452095 | 1.396273181  | 0.491143297 | 2.842903873  | 0.004470455 | 0.057717614 | CR847906.1        |                      |                   |
| ENSDARG00000012600  | 221.2490681 | 0.719946876  | 0.253314149 | 2.842110792  | 0.004481591 | 0.057825366 | si:dkey-97a13.6   | ZDB-GENE-070912-617  | si:dkey-97a13.6   |
| ENSDARG00000002764  | 134.2816325 | 0.978874038  | 0.344443123 | 2.841903273  | 0.00448451  | 0.057827011 | miox              | ZDB-GENE-050913-113  | miox              |

|                    |             |              |             |              |             |             |                   |                      |                   |
|--------------------|-------------|--------------|-------------|--------------|-------------|-------------|-------------------|----------------------|-------------------|
| ENSDARG00000052386 | 62.65481021 | 0.407205887  | 0.143302221 | 2.841588101  | 0.004488945 | 0.057848204 | cldnd1b           | ZDB-GENE-040808-4    | cldnd1b           |
| ENSDARG00000053484 | 126.9161633 | 0.388515016  | 0.136825861 | 2.839485269  | 0.004518638 | 0.058194667 | syne2b            | ZDB-GENE-071218-5    | syne2b            |
| ENSDARG00000088225 | 34.23978486 | -0.498074046 | 0.175455065 | -2.838755584 | 0.004528983 | 0.058291672 | FO082877.1        |                      |                   |
| ENSDARG00000074804 | 74.03612525 | 0.44231801   | 0.155849499 | 2.838109927  | 0.004538155 | 0.058359985 | atxn7             | ZDB-GENE-110621-1    | atxn7             |
| ENSDARG00000063100 | 110.3233404 | -0.414459443 | 0.146040011 | -2.837985569 | 0.004539924 | 0.058359985 | psmd14            | ZDB-GENE-070410-56   | psmd14            |
| ENSDARG00000077745 | 4.532397801 | 1.214015678  | 0.428114284 | 2.835728036  | 0.004572136 | 0.058737635 | si:ch73-380l3.2   | ZDB-GENE-080303-1    | si:ch73-380l3.2   |
| ENSDARG00000060748 | 70.8342859  | -0.641228069 | 0.226151355 | -2.835393447 | 0.004576928 | 0.058762765 | tsfm              | ZDB-GENE-061215-17   | tsfm              |
| ENSDARG00000031775 | 66.17571319 | -0.502846221 | 0.17742875  | -2.834074079 | 0.004595868 | 0.058969393 | ube2s             | ZDB-GENE-050913-92   | ube2s             |
| ENSDARG00000105266 | 9.974249221 | 0.733741916  | 0.258955508 | 2.833467117  | 0.004604605 | 0.059044935 | si:dkey-16p6.1    | ZDB-GENE-081103-43   | si:dkey-16p6.1    |
| ENSDARG00000029105 | 18.92515597 | 0.844825579  | 0.298241254 | 2.832691879  | 0.004615785 | 0.059148952 | ftf51             | ZDB-GENE-081104-54   | ftf51             |
| ENSDARG00000074328 | 7.680249355 | -1.134235391 | 0.400448956 | -2.832409411 | 0.004619865 | 0.059148952 | apba1b            | ZDB-GENE-070925-3    | apba1b            |
| ENSDARG00000007241 | 130.3973389 | -0.578414168 | 0.204219823 | -2.83231157  | 0.004621279 | 0.059148952 | mycb              | ZDB-GENE-040426-780  | mycb              |
| ENSDARG00000053912 | 275.9698574 | -0.491743828 | 0.173675874 | -2.831388243 | 0.004634643 | 0.059283374 | fbl               | ZDB-GENE-040426-1936 | fbl               |
| ENSDARG00000045802 | 32.79720005 | 0.51727388   | 0.182783542 | 2.829980617  | 0.004655082 | 0.059457286 | hapln3            | ZDB-GENE-040426-2089 | hapln3            |
| ENSDARG00000005098 | 17.30244746 | -0.823336092 | 0.290960634 | -2.829716449 | 0.004658927 | 0.059457286 | zgc:86764         | ZDB-GENE-040718-435  | zgc:86764         |
| ENSDARG00000009689 | 180.6533631 | -0.26276695  | 0.092866234 | -2.829520898 | 0.004661776 | 0.059457286 | daam1b            | ZDB-GENE-030131-4212 | daam1b            |
| ENSDARG00000036424 | 21.55432523 | 0.688567682  | 0.243354361 | 2.829485694  | 0.004662288 | 0.059457286 | pcdh20            |                      |                   |
| ENSDARG00000027734 | 240.2951308 | 0.228857035  | 0.080887877 | 2.829311913  | 0.004664821 | 0.059457286 | srsf5b            | ZDB-GENE-040718-354  | srsf5b            |
| ENSDARG00000039730 | 15806.89379 | 0.647007126  | 0.228683539 | 2.829268466  | 0.004665454 | 0.059457286 | zgc:112160        | ZDB-GENE-050417-229  | zgc:112160        |
| ENSDARG00000017741 | 317.8419093 | -0.534241133 | 0.188872538 | -2.828580262 | 0.004675498 | 0.059548654 | g3bp1             | ZDB-GENE-030131-7452 | g3bp1             |
| ENSDARG00000098369 | 13.94726273 | -3.278548005 | 1.159391819 | -2.827817094 | 0.004686658 | 0.059654126 | si:dkey-165o8.1   | ZDB-GENE-131118-7    | si:dkey-165o8.1   |
| ENSDARG00000059960 | 79.38254135 | 0.430838438  | 0.152410064 | 2.826837206  | 0.004701022 | 0.059800232 | plch2a            | ZDB-GENE-030131-6367 | plch2a            |
| ENSDARG00000019585 | 24.56074363 | 0.930810462  | 0.329329349 | 2.826381755  | 0.004707712 | 0.059848596 | gstk2             | ZDB-GENE-100922-14   | gstk2             |
| ENSDARG00000073786 | 141.7885006 | 0.434104819  | 0.153650749 | 2.825269792  | 0.004724082 | 0.060019883 | cmb1              | ZDB-GENE-071004-21   | cmb1              |
| ENSDARG00000025820 | 7.622226901 | -1.037284476 | 0.367303069 | -2.824056111 | 0.004742008 | 0.060138429 | chek2             | ZDB-GENE-030131-8942 | chek2             |
| ENSDARG00000004658 | 130.6033002 | -0.520703522 | 0.184395813 | -2.823835931 | 0.004745267 | 0.060138429 | zgc:101810        | ZDB-GENE-041121-7    | zgc:101810        |
| ENSDARG00000022891 | 147.0676634 | 0.466156537  | 0.165079336 | 2.82383337   | 0.004745305 | 0.060138429 | zgc:175214        | ZDB-GENE-080303-32   | zgc:175214        |
| ENSDARG00000038822 | 25.43679277 | -0.541060751 | 0.191631572 | -2.823442642 | 0.004751093 | 0.060138429 | dhodh             | ZDB-GENE-030131-3157 | dhodh             |
| ENSDARG00000019856 | 96.94432634 | -0.593561888 | 0.210241485 | -2.823238657 | 0.004754117 | 0.060138429 | atp1a1b           | ZDB-GENE-001212-5    | atp1a1b           |
| ENSDARG00000074060 | 53.17689734 | 0.49220503   | 0.174348619 | 2.823108278  | 0.004756051 | 0.060138429 | map3k14a          | ZDB-GENE-120215-80   | map3k14a          |
| ENSDARG00000036076 | 72.58020154 | -0.618367046 | 0.219039538 | -2.823084144 | 0.004756409 | 0.060138429 | heatr3            | ZDB-GENE-040426-1876 | heatr3            |
| ENSDARG00000007496 | 126.8326338 | 0.349485731  | 0.123796373 | 2.823069228  | 0.004756663 | 0.060138429 | ufl1              | ZDB-GENE-040426-1163 | ufl1              |
| ENSDARG00000099266 | 194.2258833 | 0.335649027  | 0.118914888 | 2.822598868  | 0.004763613 | 0.060189995 | vasna             | ZDB-GENE-050522-43   | vasna             |
| ENSDARG00000077960 | 287.0909808 | 0.553498748  | 0.196133963 | 2.822044384  | 0.004771857 | 0.06025742  | si:ch211-186e20.7 | ZDB-GENE-110407-6    | si:ch211-186e20.7 |
| ENSDARG00000037555 | 56.9103214  | -0.439469114 | 0.155873879 | -2.819389089 | 0.004811516 | 0.060721209 | atoh8             | ZDB-GENE-061215-7    | atoh8             |
| ENSDARG00000062801 | 156.7189933 | 0.353620797  | 0.125522747 | 2.817184965  | 0.004844662 | 0.06110231  | erfl3             | ZDB-GENE-090529-4    | erfl3             |
| ENSDARG00000038822 | 165.7907943 | -0.484025015 | 0.171825515 | -2.816956586 | 0.004848108 | 0.061108571 | mrc1b             | ZDB-GENE-070705-13   | mrc1b             |
| ENSDARG00000077072 | 10.53004056 | -0.827294825 | 0.293705589 | -2.816748665 | 0.004851247 | 0.06111097  | si:ch73-280o22.2  | ZDB-GENE-141216-272  | si:ch73-280o22.2  |
| ENSDARG00000009978 | 530.8241666 | -0.494057589 | 0.175432739 | -2.816222287 | 0.004859203 | 0.061119716 | icn               | ZDB-GENE-030131-8599 | icn               |
| ENSDARG00000062650 | 148.1732707 | -0.442912845 | 0.157272725 | -2.816208889 | 0.004859406 | 0.061119716 | rif1              | ZDB-GENE-030131-3406 | rif1              |
| ENSDARG00000039052 | 44.92100791 | -0.396658727 | 0.140867836 | -2.815821829 | 0.004865264 | 0.061119716 | klhl40a           | ZDB-GENE-050916-1    | klhl40a           |
| ENSDARG00000075446 | 150.1917025 | -0.304475433 | 0.108136843 | -2.815649354 | 0.004867876 | 0.061119716 | naa25             | ZDB-GENE-041111-190  | naa25             |
| ENSDARG00000035188 | 154.3725274 | 0.223086259  | 0.079233942 | 2.815539081  | 0.004869547 | 0.061119716 | rab14l            | ZDB-GENE-040426-1207 | rab14l            |
| ENSDARG00000070187 | 197.5321505 | 0.322346372  | 0.114488576 | 2.815533062  | 0.004869639 | 0.061119716 | dyrk1b            | ZDB-GENE-060503-499  | dyrk1b            |
| ENSDARG00000090195 | 23.64074061 | 0.597028923  | 0.212098646 | 2.814864382  | 0.004879782 | 0.061209956 | mtx3              | ZDB-GENE-021210-3    | mtx3              |
| ENSDARG00000013730 | 435.0997183 | 0.581941022  | 0.206799609 | 2.814033478  | 0.004892413 | 0.06129949  | slc4a4a           | ZDB-GENE-060526-274  | slc4a4a           |

|                    |             |              |             |              |             |             |                  |                      |                  |
|--------------------|-------------|--------------|-------------|--------------|-------------|-------------|------------------|----------------------|------------------|
| ENSDARG00000055344 | 60.02969261 | -0.3636263   | 0.129220173 | -2.814005674 | 0.004892836 | 0.06129949  | mipep            | ZDB-GENE-060503-662  | mipep            |
| ENSDARG00000090854 | 4.055682442 | -1.540910186 | 0.547973008 | -2.812018409 | 0.004923169 | 0.061642235 | lsm11            | ZDB-GENE-050309-124  | lsm11            |
| ENSDARG00000079688 | 623.2508451 | 0.265490442  | 0.094425179 | 2.811648805  | 0.004928829 | 0.0616661   | tnrc6a           | ZDB-GENE-030131-2519 | tnrc6a           |
| ENSDARG00000013279 | 20.42397357 | 0.708787047  | 0.252131271 | 2.811182621  | 0.004935976 | 0.0616661   | znf76            | ZDB-GENE-061027-379  | znf76            |
| ENSDARG00000079616 | 42.18985765 | 0.428890314  | 0.152566438 | 2.811170788  | 0.004936158 | 0.0616661   | cramp1           | ZDB-GENE-030131-8255 | cramp1           |
| ENSDARG00000092057 | 9.15027034  | -8.185453113 | 2.911787276 | -2.811143926 | 0.00493657  | 0.0616661   | si:dkey-90l23.1  | ZDB-GENE-030131-5242 | si:dkey-90l23.1  |
| ENSDARG00000002219 | 18.88363263 | 1.054447058  | 0.375216204 | 2.810238595  | 0.004950479 | 0.061760613 | si:dkey-103j14.5 | ZDB-GENE-090313-170  | si:dkey-103j14.5 |
| ENSDARG00000088807 | 44.5548273  | 0.563256211  | 0.200444936 | 2.810029631  | 0.004953694 | 0.061760613 | klhl22           | ZDB-GENE-081104-154  | klhl22           |
| ENSDARG00000045636 | 93.01602318 | 0.323972589  | 0.11530321  | 2.809744756  | 0.00495808  | 0.061760613 | rbl2             | ZDB-GENE-061109-2    | rbl2             |
| ENSDARG00000098821 | 58.83515802 | -0.459534417 | 0.163560063 | -2.809575933 | 0.004960682 | 0.061760613 | sec14l1          | ZDB-GENE-040426-801  | sec14l1          |
| ENSDARG00000070657 | 478.8116946 | -0.228833214 | 0.081450811 | -2.809465119 | 0.00496239  | 0.061760613 | pa2g4b           | ZDB-GENE-030131-2182 | pa2g4b           |
| ENSDARG00000091413 | 13.00459743 | -0.765123507 | 0.272349197 | -2.809347395 | 0.004964205 | 0.061760613 | TIMM22           |                      |                  |
| ENSDARG00000016483 | 165.8811691 | 0.409666596  | 0.145829356 | 2.809218999  | 0.004966185 | 0.061760613 | baiap2l2a        | ZDB-GENE-040108-10   | baiap2l2a        |
| ENSDARG00000003941 | 118.6506667 | -0.555372983 | 0.197706627 | -2.809076218 | 0.004968388 | 0.061760613 | rrs1             | ZDB-GENE-030131-9345 | rrs1             |
| ENSDARG00000006003 | 22.95466035 | -0.798021584 | 0.284167729 | -2.808276606 | 0.004980743 | 0.061877067 | mycla            | ZDB-GENE-040426-2439 | mycla            |
| ENSDARG00000061143 | 51.58305062 | -0.405886232 | 0.144621604 | -2.806539416 | 0.005007679 | 0.062174425 | tapt1b           | ZDB-GENE-030131-4025 | tapt1b           |
| ENSDARG00000042285 | 3.935638248 | -1.574709245 | 0.561208817 | -2.805923923 | 0.005017254 | 0.062256006 | atp8b3           | ZDB-GENE-050208-424  | atp8b3           |
| ENSDARG00000075027 | 6.485561236 | -1.034060728 | 0.368621648 | -2.805208898 | 0.005028398 | 0.062356949 | fgfr1bl          | ZDB-GENE-091204-406  | fgfr1bl          |
| ENSDARG00000078620 | 18.10954553 | 0.890313928  | 0.317431294 | 2.804745294  | 0.005035636 | 0.062391088 | si:dkey-156m2.3  | ZDB-GENE-121213-8    | si:dkey-156m2.3  |
| ENSDARG00000090286 | 10917.93944 | 0.450131038  | 0.160494726 | 2.804646913  | 0.005037173 | 0.062391088 | serpina1         | ZDB-GENE-030131-1421 | serpina1         |
| ENSDARG00000094704 | 19.65781917 | 0.602434844  | 0.214893677 | 2.803408881  | 0.005056552 | 0.062566557 | bcl2a            | ZDB-GENE-051012-1    | bcl2a            |
| ENSDARG00000105281 | 60.67385806 | 0.449756185  | 0.160434904 | 2.80335621   | 0.005057378 | 0.062566557 | p2ry1            | ZDB-GENE-121004-2    | p2ry1            |
| ENSDARG00000099877 | 29.55139006 | 0.542809164  | 0.193653381 | 2.802993485  | 0.005063069 | 0.062591278 | si:dkeyp-72e1.6  | ZDB-GENE-120215-228  | si:dkeyp-72e1.6  |
| ENSDARG00000091006 | 890.3033508 | 0.475898995  | 0.16979147  | 2.802843956  | 0.005065417 | 0.062591278 | cobl             | ZDB-GENE-091020-11   | cobl             |
| ENSDARG00000013351 | 2969.839357 | 0.331061739  | 0.11816664  | 2.801651446  | 0.005084177 | 0.062760965 | cirbbp           | ZDB-GENE-030131-5841 | cirbbp           |
| ENSDARG00000101814 | 35.86314153 | 0.505132396  | 0.180310544 | 2.801457891  | 0.005087228 | 0.062760965 | lpar3            | ZDB-GENE-120202-1    | lpar3            |
| ENSDARG00000010729 | 128.6344867 | 1.876684013  | 0.669910775 | 2.80139398   | 0.005088236 | 0.062760965 | CABZ01073795.1   |                      |                  |
| ENSDARG00000071216 | 30.45857513 | 3.895913173  | 1.390860185 | 2.801081816  | 0.00509316  | 0.062784337 | si:ch211-133n4.9 | ZDB-GENE-070424-126  | si:ch211-133n4.9 |
| ENSDARG00000056757 | 3.819263319 | 1.658982214  | 0.592330694 | 2.800770298  | 0.005098079 | 0.06280761  | slc39a8          | ZDB-GENE-050419-124  | slc39a8          |
| ENSDARG00000018000 | 56.1907527  | -0.393116452 | 0.140378036 | -2.800412823 | 0.005103729 | 0.062811905 | ubp1             | ZDB-GENE-060503-870  | ubp1             |
| ENSDARG00000040527 | 37.90773014 | -0.425240046 | 0.151851667 | -2.800364683 | 0.00510449  | 0.062811905 | siae             | ZDB-GENE-040426-1032 | siae             |
| ENSDARG00000027899 | 115.3188295 | -0.519326614 | 0.185494224 | -2.79969157  | 0.005115145 | 0.062905665 | sem1             | ZDB-GENE-030131-988  | sem1             |
| ENSDARG00000053021 | 66.87541337 | -0.425000741 | 0.151852233 | -2.798778341 | 0.005129634 | 0.063046424 | grsf1            | ZDB-GENE-060825-196  | grsf1            |
| ENSDARG00000100942 | 8.614037077 | 1.1470096    | 0.40988489  | 2.798370052  | 0.005136123 | 0.063088764 | zgc:194655       | ZDB-GENE-081022-137  | zgc:194655       |
| ENSDARG00000068213 | 54.84590975 | -0.443422007 | 0.158532942 | -2.797033871 | 0.005157413 | 0.063311448 | fzd10            | ZDB-GENE-990415-220  | fzd10            |
| ENSDARG00000024416 | 72.47289303 | -0.417446628 | 0.149265699 | -2.79666816  | 0.005163253 | 0.063311448 | twistnb          | ZDB-GENE-041007-3    | twistnb          |
| ENSDARG00000071215 | 68.2960927  | 0.341173159  | 0.12199317  | 2.796657863  | 0.005163418 | 0.063311448 | palm3            | ZDB-GENE-061215-74   | palm3            |
| ENSDARG00000060199 | 77.69719306 | -0.432250047 | 0.154691726 | -2.794267406 | 0.005201745 | 0.063743673 | mrpl18           | ZDB-GENE-061013-632  | mrpl18           |
| ENSDARG00000041645 | 986.7084473 | 0.885954808  | 0.317088522 | 2.794029893  | 0.005205567 | 0.063752808 | sb:cb37          | ZDB-GENE-030131-9800 | sb:cb37          |
| ENSDARG00000018688 | 77.22128069 | 0.34422488   | 0.123270727 | 2.792430039  | 0.005231378 | 0.064031076 | elk3             | ZDB-GENE-030716-2    | elk3             |
| ENSDARG00000097155 | 8.878076816 | -1.023290851 | 0.366499757 | -2.792064202 | 0.005237296 | 0.064065676 | GDPGP1           | ZDB-GENE-060929-280  | zgc:153343       |
| ENSDARG00000112454 | 295.5821624 | 0.843856544  | 0.302269421 | 2.791736393  | 0.005242605 | 0.064092776 | FO744833.2       |                      |                  |
| ENSDARG00000005049 | 55.46426778 | 0.418661155  | 0.150009381 | 2.790899817  | 0.005256174 | 0.064219284 | rab20            | ZDB-GENE-030131-9143 | rab20            |
| ENSDARG00000024708 | 9.2064352   | 0.910743313  | 0.326379874 | 2.790439562  | 0.005263653 | 0.064219284 | slc25a23b        | ZDB-GENE-040724-220  | slc25a23b        |
| ENSDARG00000104696 | 63.14260866 | -0.398466823 | 0.142801034 | -2.790363703 | 0.005264886 | 0.064219284 | apooa            | ZDB-GENE-031118-91   | apooa            |
| ENSDARG00000101695 | 165.7390695 | 0.561484833  | 0.201226204 | 2.790316674  | 0.005265651 | 0.064219284 | si:dkey-26m3.3   | ZDB-GENE-070705-445  | si:dkey-26m3.3   |

|                    |             |              |             |              |             |             |                   |                      |                   |
|--------------------|-------------|--------------|-------------|--------------|-------------|-------------|-------------------|----------------------|-------------------|
| ENSDARG0000057032  | 32.90305035 | 0.619908944  | 0.222178059 | 2.790144748  | 0.005268448 | 0.064219284 | ppm1nb            | ZDB-GENE-071004-34   | ppm1nb            |
| ENSDARG0000055504  | 877.2221668 | 0.434999625  | 0.155974875 | 2.788908305  | 0.005288604 | 0.064427069 | si:ch211-212k18.7 | ZDB-GENE-030131-1312 | si:ch211-212k18.7 |
| ENSDARG0000035514  | 61.34941585 | 0.643491308  | 0.230849654 | 2.787490888  | 0.005311795 | 0.064639691 | adam28            | ZDB-GENE-060929-532  | adam28            |
| ENSDARG0000061560  | 47.27141501 | 0.517434258  | 0.185629281 | 2.787460328  | 0.005312296 | 0.064639691 | stim1b            | ZDB-GENE-060531-4    | stim1b            |
| ENSDARG00000115029 | 8.555334771 | 0.916013957  | 0.328653393 | 2.787173288  | 0.005317004 | 0.06465901  | si:dkeyp-123a12.2 | ZDB-GENE-041210-271  | si:dkeyp-123a12.2 |
| ENSDARG0000024488  | 133.0261175 | -0.494542537 | 0.177494069 | -2.786248238 | 0.005332202 | 0.064805801 | top2a             | ZDB-GENE-030131-2453 | top2a             |
| ENSDARG0000041998  | 29.17658755 | 0.618694911  | 0.222076221 | 2.785957489  | 0.005336987 | 0.064825935 | zgc:113337        | ZDB-GENE-050306-20   | zgc:113337        |
| ENSDARG0000056084  | 8.615341331 | 0.969187607  | 0.348017662 | 2.784880517  | 0.005354745 | 0.065003531 | igsf21b           | ZDB-GENE-070424-59   | igsf21b           |
| ENSDARG0000042899  | 43.30057952 | 0.617810535  | 0.221896328 | 2.784230552  | 0.005365488 | 0.06509581  | si:ch211-163l21.8 | ZDB-GENE-041008-93   | si:ch211-163l21.8 |
| ENSDARG00000077513 | 18.18875968 | 0.627589178  | 0.225473196 | 2.783431416  | 0.005378723 | 0.0652182   | ppp1r3da          | ZDB-GENE-080204-75   | ppp1r3da          |
| ENSDARG00000101353 | 3.376366429 | 2.209308137  | 0.794092644 | 2.782179327  | 0.00539952  | 0.065432073 | f13b              | ZDB-GENE-050208-701  | f13b              |
| ENSDARG0000045834  | 624.8855788 | 0.62209262   | 0.223709638 | 2.780803838  | 0.005422449 | 0.065671532 | si:dkey-14d8.7    | ZDB-GENE-041210-143  | si:dkey-14d8.7    |
| ENSDARG00000104105 | 26.01971403 | -0.704839923 | 0.253541006 | -2.779983928 | 0.005436159 | 0.065767843 | tff2              | ZDB-GENE-110411-73   | tff2              |
| ENSDARG0000059388  | 113.0050972 | 0.368090076  | 0.132412285 | 2.779878578  | 0.005437923 | 0.065767843 | bdh1              | ZDB-GENE-070410-130  | bdh1              |
| ENSDARG00000011671 | 5.260553572 | -1.681305437 | 0.60483853  | -2.779759146 | 0.005439923 | 0.065767843 | pde6b             | ZDB-GENE-090421-2    | pde6b             |
| ENSDARG00000004378 | 91.12454969 | 0.287736235  | 0.103545438 | 2.778840284  | 0.005455334 | 0.065915704 | yrk               | ZDB-GENE-030131-9517 | yrk               |
| ENSDARG00000054942 | 381.4171761 | 0.399415909  | 0.143822003 | 2.777154396  | 0.005483712 | 0.066219981 | lgals2a           | ZDB-GENE-050318-2    | lgals2a           |
| ENSDARG00000008503 | 44.5312965  | 0.409245981  | 0.147398882 | 2.776452414  | 0.005495568 | 0.066324495 | glcci1a           | ZDB-GENE-031010-41   | glcci1a           |
| ENSDARG00000061764 | 5063.047164 | -0.404553586 | 0.145731896 | -2.776012648 | 0.005503007 | 0.066375615 | ahnak             | ZDB-GENE-030131-8719 | ahnak             |
| ENSDARG00000003909 | 27.45707316 | 0.729587579  | 0.262885922 | 2.775301067  | 0.005515063 | 0.066482333 | frt01             | ZDB-GENE-070705-491  | frt01             |
| ENSDARG00000058372 | 2.97943568  | -1.651877498 | 0.595260409 | -2.775050169 | 0.005519319 | 0.066494962 | mcph1             | ZDB-GENE-060421-6122 | mcph1             |
| ENSDARG00000031366 | 21.07971639 | -0.592339277 | 0.213515999 | -2.774214961 | 0.00553351  | 0.066627192 | rtn4ip1           | ZDB-GENE-040426-1314 | rtn4ip1           |
| ENSDARG00000055722 | 149.6852118 | 0.352631487  | 0.127152534 | 2.773294998  | 0.005549179 | 0.066777056 | bco2a             | ZDB-GENE-030131-8039 | bco2a             |
| ENSDARG00000061496 | 2.102834592 | -1.73642989  | 0.626236193 | -2.772803472 | 0.005557567 | 0.066839182 | si:ch211-250e5.2  | ZDB-GENE-030131-8384 | si:ch211-250e5.2  |
| ENSDARG00000093886 | 3.515320921 | -7.533219615 | 2.717208908 | -2.772410907 | 0.005564275 | 0.066881035 | tmsb5             |                      |                   |
| ENSDARG00000095717 | 14.51924005 | 0.680682282  | 0.245666677 | 2.770755437  | 0.005592641 | 0.067148496 | si:dkey-172k15.6  | ZDB-GENE-121214-9    | si:dkey-172k15.6  |
| ENSDARG00000001910 | 266.1563054 | 0.312436623  | 0.11276312  | 2.770734116  | 0.005593008 | 0.067148496 | rorab             | ZDB-GENE-040426-855  | rorab             |
| ENSDARG00000014101 | 78.50261514 | -0.481636239 | 0.17385605  | -2.770316235 | 0.005600189 | 0.067195784 | pyroxd2           | ZDB-GENE-050506-147  | pyroxd2           |
| ENSDARG00000077810 | 113.5483568 | 0.621155377  | 0.224245036 | 2.769984965  | 0.005605888 | 0.067225238 | otud4             | ZDB-GENE-030131-5338 | otud4             |
| ENSDARG00000056379 | 45.52426318 | -0.409108206 | 0.147713743 | -2.769601515 | 0.005612491 | 0.067265495 | si:ch73-86n18.1   | ZDB-GENE-141216-19   | si:ch73-86n18.1   |
| ENSDARG00000097285 | 356.2137536 | 0.57118523   | 0.206285532 | 2.768905919  | 0.005624487 | 0.067370305 | ANPEP             | ZDB-GENE-131127-23   | si:ch211-147g22.5 |
| ENSDARG00000091271 | 12.26866979 | -0.838624815 | 0.302918379 | -2.768484426 | 0.005631768 | 0.067418539 | si:ch211-225g23.1 | ZDB-GENE-030131-3256 | si:ch211-225g23.1 |
| ENSDARG00000017312 | 36.90141039 | 0.458398861  | 0.165592838 | 2.768228782  | 0.005636188 | 0.067432493 | lmbd2b            | ZDB-GENE-030131-7197 | lmbd2b            |
| ENSDARG00000032317 | 60.48234442 | 0.413926503  | 0.149599588 | 2.766896003  | 0.005659281 | 0.067669712 | tox               | ZDB-GENE-070912-181  | tox               |
| ENSDARG00000022650 | 160.7872232 | 0.330742171  | 0.119556468 | 2.766409684  | 0.005667728 | 0.06773164  | cyp2ad3           | ZDB-GENE-041001-156  | cyp2ad3           |
| ENSDARG00000086778 | 51.24173435 | 0.488690261  | 0.176695638 | 2.765717746  | 0.005679767 | 0.067836389 | pdgfa             | ZDB-GENE-050208-525  | pdgfa             |
| ENSDARG00000113527 | 1.983260522 | 1.862178069  | 0.673460697 | 2.765087967  | 0.005690745 | 0.067928348 | si:ch211-209n20.3 | ZDB-GENE-070705-100  | si:ch211-209n20.3 |
| ENSDARG00000056986 | 40.59267571 | 0.583876951  | 0.211247484 | 2.763947476  | 0.005710673 | 0.068094707 | dact2             | ZDB-GENE-030131-9975 | dact2             |
| ENSDARG00000043446 | 31.74263792 | -0.556555748 | 0.201365053 | -2.763914296 | 0.005711254 | 0.068094707 | efhd1             | ZDB-GENE-030131-7461 | efhd1             |
| ENSDARG00000101629 | 5933.049404 | 0.69391284   | 0.251131777 | 2.763142313  | 0.00572478  | 0.068178323 | CABZ01079192.1    |                      |                   |
| ENSDARG00000063079 | 39.58337459 | -0.723001567 | 0.261659937 | -2.763134371 | 0.005724919 | 0.068178323 | ago3b             | ZDB-GENE-060503-452  | ago3b             |
| ENSDARG00000045694 | 63.01251753 | 0.432299767  | 0.156479483 | 2.762661019  | 0.005733228 | 0.068178323 | prickle1b         | ZDB-GENE-030131-2152 | prickle1b         |
| ENSDARG00000069244 | 39.64187518 | 0.861223686  | 0.311739232 | 2.762641325  | 0.005733573 | 0.068178323 | si:ch211-244b2.3  | ZDB-GENE-030131-4737 | si:ch211-244b2.3  |
| ENSDARG00000063555 | 49.82813083 | 0.386518779  | 0.139912441 | 2.76257619   | 0.005734718 | 0.068178323 | si:ch211-166g5.4  | ZDB-GENE-121214-319  | si:ch211-166g5.4  |
| ENSDARG00000100095 | 132.2290987 | -0.51790469  | 0.1875694   | -2.761136363 | 0.005760062 | 0.06840897  | anxa1b            | ZDB-GENE-030131-6554 | anxa1b            |
| ENSDARG00000063921 | 15872.43767 | -0.334122553 | 0.12101071  | -2.761099026 | 0.005760721 | 0.06840897  | mt-nd5            | ZDB-GENE-011205-12   | mt-nd5            |

|                     |             |              |             |              |             |             |                   |                      |                   |
|---------------------|-------------|--------------|-------------|--------------|-------------|-------------|-------------------|----------------------|-------------------|
| ENSDARG00000099885  | 44.26014391 | 0.555846516  | 0.201377123 | 2.760226725  | 0.005776126 | 0.068552625 | trim105           | ZDB-GENE-060810-140  | trim105           |
| ENSDARG00000087018  | 3.426178208 | 1.534073697  | 0.555847857 | 2.759880563  | 0.00578225  | 0.068586021 | FO704748.1        |                      |                   |
| ENSDARG00000038159  | 92.48962307 | 0.405298217  | 0.146864289 | 2.75967848   | 0.005785827 | 0.068589195 | tcf7l1a           | ZDB-GENE-980605-30   | tcf7l1a           |
| ENSDARG00000068886  | 39.31233997 | -0.607921586 | 0.220339839 | -2.759018013 | 0.005797534 | 0.068609022 | mrpl14            | ZDB-GENE-040426-1066 | mrpl14            |
| ENSDARG00000018553  | 71.7117907  | 0.683123829  | 0.247599544 | 2.758986618  | 0.005798091 | 0.068609022 | ifih1             | ZDB-GENE-081104-438  | ifih1             |
| ENSDARG000000113599 | 33.63480924 | -1.582948084 | 0.573772903 | -2.758840781 | 0.005800679 | 0.068609022 | hbbe.1.1          | ZDB-GENE-030616-7    | hbbe.1.1          |
| ENSDARG000000102569 | 80.92795347 | -0.404218179 | 0.146517593 | -2.758837145 | 0.005800743 | 0.068609022 | polr3a            | ZDB-GENE-050208-103  | polr3a            |
| ENSDARG00000005870  | 131.0580452 | -0.26267474  | 0.095312463 | -2.755932771 | 0.005852502 | 0.069181721 | mmadhc            | ZDB-GENE-040704-50   | mmadhc            |
| ENSDARG00000073747  | 13.88812226 | -0.741969733 | 0.269245487 | -2.755736931 | 0.005856007 | 0.069183687 | si:dkey-1j5.4     | ZDB-GENE-130603-91   | si:dkey-1j5.4     |
| ENSDARG000000114958 | 5.118334582 | -7.719059548 | 2.801342701 | -2.755485626 | 0.005860508 | 0.069197405 | zp3               | ZDB-GENE-050626-121  | zp3.2             |
| ENSDARG000000114958 | 5.118334582 | -7.719059548 | 2.801342701 | -2.755485626 | 0.005860508 | 0.069197405 | zp3               | ZDB-GENE-991129-7    | zp3               |
| ENSDARG00000010252  | 32.98754451 | 0.513045358  | 0.186247715 | 2.754639742  | 0.005875679 | 0.06933703  | jak3              | ZDB-GENE-070725-4    | jak3              |
| ENSDARG00000089094  | 0.915005553 | -2.646752763 | 0.961144448 | -2.753751289 | 0.005891652 | 0.069465339 | si:dkey-160o24.3  | ZDB-GENE-140106-224  | si:dkey-160o24.3  |
| ENSDARG00000010673  | 37.54376455 | -0.488379304 | 0.17735629  | -2.753662157 | 0.005893257 | 0.069465339 | trim16            | ZDB-GENE-090512-6    | trim16            |
| ENSDARG000000113826 | 19.48293651 | 1.006620602  | 0.365630638 | 2.753107914  | 0.005903243 | 0.069543496 | si:ch211-223k15.1 | ZDB-GENE-141215-3    | si:ch211-223k15.1 |
| ENSDARG00000067613  | 50.66165193 | -0.482486723 | 0.175272222 | -2.752784877 | 0.005909071 | 0.069572597 | dnajc25           | ZDB-GENE-081104-137  | dnajc25           |
| ENSDARG00000002682  | 121.6674631 | 0.443047197  | 0.160956979 | 2.752581471  | 0.005912743 | 0.069576301 | tbcela            | ZDB-GENE-040426-1719 | tbcela            |
| ENSDARG00000099642  | 37.19216074 | -0.448640223 | 0.163011344 | -2.752202466 | 0.005919591 | 0.069587628 | dcun1d1           | ZDB-GENE-030131-5443 | dcun1d1           |
| ENSDARG00000062187  | 23.08317375 | -0.738766098 | 0.268459931 | -2.751867274 | 0.005925653 | 0.069587628 | kif14             | ZDB-GENE-030131-5759 | kif14             |
| ENSDARG00000053366  | 18.48068687 | 0.757577699  | 0.275313831 | 2.751687758  | 0.005928902 | 0.069587628 | ftr12             | ZDB-GENE-070912-196  | ftr12             |
| ENSDARG00000010432  | 86.46697587 | -0.438159373 | 0.159234432 | -2.751662231 | 0.005929364 | 0.069587628 | eaf2              | ZDB-GENE-040625-179  | eaf2              |
| ENSDARG00000044357  | 119.9663798 | -0.289318676 | 0.105145627 | -2.751599687 | 0.005930497 | 0.069587628 | tbc1d23           | ZDB-GENE-040426-1253 | tbc1d23           |
| ENSDARG00000016038  | 109.5074414 | 0.509504629  | 0.185222243 | 2.750774531  | 0.005945455 | 0.069723666 | hacd3             | ZDB-GENE-040426-1200 | hacd3             |
| ENSDARG00000087197  | 65.35144762 | 0.627890809  | 0.228297749 | 2.750315376  | 0.005953793 | 0.069772779 | ros1              | ZDB-GENE-020506-1    | ros1              |
| ENSDARG00000012790  | 189.9053719 | -0.392643351 | 0.142782054 | -2.749948886 | 0.005960456 | 0.069772779 | tmem161a          | ZDB-GENE-041111-267  | tmem161a          |
| ENSDARG00000043816  | 2.855629885 | -2.181513866 | 0.793314977 | -2.749871021 | 0.005961873 | 0.069772779 | st6galnac1.2      | ZDB-GENE-041014-161  | st6galnac1.2      |
| ENSDARG00000030465  | 111.5573642 | -0.431505073 | 0.15692218  | -2.749802946 | 0.005963111 | 0.069772779 | tmem263           | ZDB-GENE-040426-2155 | tmem263           |
| ENSDARG00000054777  | 40.95665448 | 0.382811499  | 0.139225722 | 2.749574527  | 0.005967269 | 0.06977487  | si:dkey-46a10.3   | ZDB-GENE-030131-4610 | si:dkey-46a10.3   |
| ENSDARG00000062058  | 152.6113647 | -0.378566554 | 0.137689443 | -2.749423244 | 0.005970024 | 0.06977487  | slc12a7b          | ZDB-GENE-030829-61   | slc12a7b          |
| ENSDARG000000103066 | 1.723462182 | -2.815030304 | 1.023946449 | -2.749196803 | 0.00597415  | 0.069783735 | smx5              | ZDB-GENE-000616-10   | smx5              |
| ENSDARG00000061081  | 116.0475529 | -0.550571257 | 0.200302496 | -2.748698931 | 0.005983232 | 0.069850436 | arpp21            | ZDB-GENE-081104-296  | arpp21            |
| ENSDARG00000098646  | 114.9063012 | -0.420094906 | 0.152848868 | -2.748433226 | 0.005988083 | 0.069867712 | mthfd2            | ZDB-GENE-040704-20   | mthfd2            |
| ENSDARG00000040445  | 263.3965191 | 0.639598613  | 0.232794344 | 2.74748347   | 0.006005454 | 0.070027362 | si:ch211-219a4.3  | ZDB-GENE-070424-157  | si:ch211-219a4.3  |
| ENSDARG00000099566  | 155.2660213 | -0.281987964 | 0.102641263 | -2.747315809 | 0.006008525 | 0.070027362 | lmbd2a            | ZDB-GENE-050417-32   | lmbd2a            |
| ENSDARG00000016117  | 25.19040757 | -0.710369557 | 0.258612058 | -2.746853961 | 0.006016992 | 0.070086626 | exd2              | ZDB-GENE-030131-6387 | exd2              |
| ENSDARG00000022813  | 1.676282135 | -6.165863124 | 2.244909915 | -2.746597128 | 0.006021705 | 0.070102122 | dnd1              | ZDB-GENE-030828-4    | dnd1              |
| ENSDARG00000007916  | 31.59443114 | -0.469125194 | 0.170815028 | -2.746392978 | 0.006025454 | 0.070106379 | xpnpep3           | ZDB-GENE-040426-2076 | xpnpep3           |
| ENSDARG00000042946  | 133.4456675 | 0.315507757  | 0.114906631 | 2.745775012  | 0.006036815 | 0.070199144 | hook1             | ZDB-GENE-041001-159  | hook1             |
| ENSDARG00000040991  | 69.4308869  | 0.479203995  | 0.17454677  | 2.745418857  | 0.006043371 | 0.07023597  | cttnbp2           | ZDB-GENE-030131-8134 | cttnbp2           |
| ENSDARG00000056059  | 37.14079341 | -0.60345653  | 0.21985501  | -2.744793174 | 0.006054904 | 0.070315629 | rangap1b          | ZDB-GENE-040426-1921 | rangap1b          |
| ENSDARG00000060102  | 215.9682956 | 0.338201503  | 0.123220787 | 2.74467897   | 0.006057012 | 0.070315629 | kank1a            | ZDB-GENE-060526-215  | kank1a            |
| ENSDARG00000060102  | 215.9682956 | 0.338201503  | 0.123220787 | 2.74467897   | 0.006057012 | 0.070315629 | kank1a            | ZDB-GENE-030131-4353 | wu:fc93h12        |
| ENSDARG00000001882  | 84.5011235  | 0.477262909  | 0.173899757 | 2.744471389  | 0.006060844 | 0.070320719 | kbtbd12           | ZDB-GENE-050904-1    | kbtbd12           |
| ENSDARG000000103959 | 65.95278998 | 0.428036051  | 0.155981412 | 2.744147819  | 0.006066821 | 0.070350683 | pak1              | ZDB-GENE-030826-29   | pak1              |
| ENSDARG00000070775  | 386.1828451 | 0.49594933   | 0.180743882 | 2.743934253  | 0.00607077  | 0.070357095 | cyp2x9            | ZDB-GENE-061027-109  | cyp2x9            |
| ENSDARG00000062757  | 36.28324    | -0.423134904 | 0.154301253 | -2.742264863 | 0.006101712 | 0.070670243 | zgc:158403        | ZDB-GENE-061215-116  | zgc:158403        |

|                    |             |              |             |              |             |             |                   |                      |                  |
|--------------------|-------------|--------------|-------------|--------------|-------------|-------------|-------------------|----------------------|------------------|
| ENSDARG00000052789 | 32.44409776 | 0.436969322  | 0.159355205 | 2.742108879  | 0.00610461  | 0.070670243 | azin1a            | ZDB-GENE-050417-20   | azin1a           |
| ENSDARG00000007279 | 104.1170399 | -0.330696859 | 0.120616543 | -2.741720596 | 0.006111831 | 0.070714323 | yipf5             | ZDB-GENE-040426-1057 | yipf5            |
| ENSDARG00000099240 | 17.60640057 | -0.605653338 | 0.22092987  | -2.74138276  | 0.006118119 | 0.07074758  | acap3b            | ZDB-GENE-070209-274  | acap3b           |
| ENSDARG00000040224 | 20.9372845  | -0.85979006  | 0.313714588 | -2.740676052 | 0.006131293 | 0.070786445 | krcp              | ZDB-GENE-030131-2126 | krcp             |
| ENSDARG00000026548 | 25.32496876 | 0.628464171  | 0.229320226 | 2.740552733  | 0.006133594 | 0.070786445 | cyp2u1            | ZDB-GENE-070730-1    | cyp2u1           |
| ENSDARG00000003940 | 50.51010707 | -0.371903234 | 0.135710951 | -2.740406958 | 0.006136315 | 0.070786445 | mtfr1l            | ZDB-GENE-030131-6228 | mtfr1l           |
| ENSDARG00000062084 | 64.16605962 | 0.454853818  | 0.16598452  | 2.740338784  | 0.006137588 | 0.070786445 | clcn1a            | ZDB-GENE-060503-333  | clcn1a           |
| ENSDARG00000037425 | 466.083614  | 0.653911597  | 0.238628893 | 2.740286759  | 0.00613856  | 0.070786445 | s100a10a          | ZDB-GENE-041010-35   | s100a10a         |
| ENSDARG00000009209 | 131.7238497 | 0.267686935  | 0.097715276 | 2.739458426  | 0.00615405  | 0.070925594 | slc9a6a           | ZDB-GENE-070424-104  | slc9a6a          |
| ENSDARG00000071553 | 16.66339669 | 0.85797819   | 0.313271086 | 2.738772354  | 0.006166906 | 0.071034253 | zgc:171500        | ZDB-GENE-080204-9    | zgc:171500       |
| ENSDARG00000019222 | 70.33722008 | -0.467736598 | 0.170817498 | -2.738224149 | 0.006177196 | 0.071113251 | mrpl24            | ZDB-GENE-040718-98   | mrpl24           |
| ENSDARG00000078751 | 132.3336435 | -0.289483114 | 0.105739467 | -2.737701646 | 0.006187018 | 0.071186775 | tpp2              | ZDB-GENE-121214-290  | tpp2             |
| ENSDARG00000038139 | 92.84763427 | 0.395367145  | 0.144443508 | 2.7371749    | 0.006196934 | 0.071192895 | pdgfb             | ZDB-GENE-131121-332  | pdgfb            |
| ENSDARG00000018404 | 1340.24674  | 0.311353826  | 0.113755756 | 2.737038008  | 0.006199513 | 0.071192895 | krt18a.1          | ZDB-GENE-030411-6    | krt18a.1         |
| ENSDARG00000052343 | 3.184153828 | -1.393354682 | 0.509088061 | -2.736962009 | 0.006200945 | 0.071192895 | spata18           | ZDB-GENE-050522-306  | spata18          |
| ENSDARG00000074381 | 102.6642746 | 0.28589013   | 0.104455981 | 2.736943614  | 0.006201292 | 0.071192895 | farp1             | ZDB-GENE-070424-163  | farp1            |
| ENSDARG00000087641 | 52.46204428 | -0.440602251 | 0.160996639 | -2.736717072 | 0.006205564 | 0.071202489 | cdh26.2           | ZDB-GENE-100922-183  | cdh26.2          |
| ENSDARG00000093621 | 5.438517635 | 1.132761521  | 0.414028176 | 2.735952739  | 0.006219996 | 0.071328586 | si:dkey-27b3.4    | ZDB-GENE-091204-131  | si:dkey-27b3.4   |
| ENSDARG00000060435 | 17.50891289 | -0.644204736 | 0.235492397 | -2.735564905 | 0.00622733  | 0.071335867 | bnip1             | ZDB-GENE-060503-81   | bnip1            |
| ENSDARG00000099653 | 129.3697924 | -0.326694257 | 0.119425215 | -2.735555105 | 0.006227516 | 0.071335867 | PSMD2 (1 of many) |                      |                  |
| ENSDARG00000018149 | 2242.934378 | -0.455540064 | 0.16654803  | -2.735187349 | 0.006234478 | 0.071376163 | slc38a4           | ZDB-GENE-041010-14   | slc38a4          |
| ENSDARG00000098289 | 1.849723544 | -2.199843984 | 0.804385175 | -2.73481418  | 0.00624155  | 0.071417669 | vstm2l            | ZDB-GENE-040426-1548 | vstm2l           |
| ENSDARG00000103199 | 120.8989847 | -0.616395083 | 0.225422104 | -2.734403911 | 0.006249333 | 0.071467265 | si:dkey-247k7.2   | ZDB-GENE-031118-45   | si:dkey-247k7.2  |
| ENSDARG00000104134 | 6.66260558  | 1.326719162  | 0.485281336 | 2.73391755   | 0.006258571 | 0.071533434 | BX323793.1        |                      |                  |
| ENSDARG00000021120 | 45.23222176 | -0.552194897 | 0.202046405 | -2.733010257 | 0.006275838 | 0.071653875 | ndc1              | ZDB-GENE-030131-7176 | ndc1             |
| ENSDARG00000007751 | 6.036811923 | -1.273619089 | 0.466014958 | -2.733000448 | 0.006276025 | 0.071653875 | lmln3             | ZDB-GENE-020424-4    | lmln3            |
| ENSDARG00000067608 | 1.841937828 | -1.953835884 | 0.71537964  | -2.731187433 | 0.006310657 | 0.071974446 | zswim7            | ZDB-GENE-030131-4255 | zswim7           |
| ENSDARG00000045935 | 5.280487845 | -1.031829849 | 0.377818042 | -2.731023228 | 0.006313802 | 0.071974446 | immp1l            | ZDB-GENE-070522-4    | immp1l           |
| ENSDARG00000074360 | 2.309061705 | 1.539557454  | 0.563736934 | 2.730985612  | 0.006314523 | 0.071974446 | fr57              | ZDB-GENE-090312-35   | fr57             |
| ENSDARG00000075600 | 13.61265898 | 1.049095651  | 0.384208956 | 2.730534091  | 0.006323179 | 0.072033492 | si:dkeyp-41f9.3   | ZDB-GENE-091118-56   | si:dkeyp-41f9.3  |
| ENSDARG00000071589 | 19.39510947 | -0.656947908 | 0.240638447 | -2.730020559 | 0.006333038 | 0.072106157 | si:dkey-253d23.2  | ZDB-GENE-050208-410  | si:dkey-253d23.2 |
| ENSDARG00000011257 | 72.12137823 | 0.43970617   | 0.161087272 | 2.729614604  | 0.006340841 | 0.072115967 | enpp2             | ZDB-GENE-040426-1156 | enpp2            |
| ENSDARG00000060338 | 5.947158402 | -0.970285055 | 0.355466081 | -2.729613616 | 0.00634086  | 0.072115967 | trmt12            | ZDB-GENE-060825-182  | trmt12           |
| ENSDARG00000116833 | 41.11459397 | 0.555132656  | 0.203406038 | 2.729184748  | 0.006349112 | 0.072170217 | CABZ01077220.2    |                      |                  |
| ENSDARG00000071724 | 22.23020574 | -0.697139997 | 0.255482401 | -2.728720235 | 0.006358062 | 0.072198537 | ankha             | ZDB-GENE-050913-33   | ankha            |
| ENSDARG00000011171 | 11.54431485 | 1.013127198  | 0.371288041 | 2.728682549  | 0.006358788 | 0.072198537 | si:ch211-12m10.1  | ZDB-GENE-060503-100  | si:ch211-12m10.1 |
| ENSDARG00000089205 | 16.61451586 | -0.581677186 | 0.213184678 | -2.728513106 | 0.006362056 | 0.072198537 | si:dkey-73n8.3    | ZDB-GENE-141219-27   | si:dkey-73n8.3   |
| ENSDARG00000053479 | 22.40783839 | 0.689457204  | 0.252807222 | 2.727205334  | 0.006387328 | 0.072445652 | gdf6a             | ZDB-GENE-980526-373  | gdf6a            |
| ENSDARG00000020387 | 110.0727486 | -0.454138339 | 0.166553246 | -2.726685609 | 0.006397396 | 0.072520154 | nipsnap3a         | ZDB-GENE-040426-1037 | nipsnap3a        |
| ENSDARG00000098443 | 51.23726448 | -0.428661637 | 0.15724848  | -2.726014512 | 0.006410418 | 0.072610758 | zfand6            | ZDB-GENE-030131-8405 | zfand6           |
| ENSDARG00000100955 | 216.4530637 | 0.405559124  | 0.148779208 | 2.725912637  | 0.006412397 | 0.072610758 | stk24a            | ZDB-GENE-070424-52   | stk24a           |
| ENSDARG00000075687 | 39.34045166 | -0.529933294 | 0.19441957  | -2.725719921 | 0.006416142 | 0.072613484 | anapc1            | ZDB-GENE-081107-12   | anapc1           |
| ENSDARG00000070625 | 71.76494254 | 0.360621484  | 0.132361318 | 2.724523222  | 0.00643944  | 0.07283738  | enpp5             | ZDB-GENE-041014-10   | enpp5            |
| ENSDARG00000071462 | 124.523745  | 0.504715986  | 0.185304355 | 2.723713568  | 0.006455246 | 0.072976332 | lama3             | ZDB-GENE-050208-475  | lama3            |
| ENSDARG00000091836 | 67.91181988 | 0.46975247   | 0.172481064 | 2.723501688  | 0.006459389 | 0.072977512 | cas7              | ZDB-GENE-050522-506  | cas7             |
| ENSDARG00000056798 | 54.052259   | 0.697385146  | 0.256076397 | 2.723348013  | 0.006462394 | 0.072977512 | zgc:123297        | ZDB-GENE-051127-9    | zgc:123297       |



|                    |             |              |             |              |             |             |                  |                      |                  |
|--------------------|-------------|--------------|-------------|--------------|-------------|-------------|------------------|----------------------|------------------|
| ENSDARG00000074298 | 36.34291759 | 0.4470159    | 0.164179764 | 2.722722268  | 0.006474646 | 0.073076046 | znf1015          | ZDB-GENE-050913-139  | znf1015          |
| ENSDARG00000029944 | 9.07933583  | -1.013737922 | 0.372350426 | -2.722537296 | 0.006478272 | 0.073077166 | parppb           | ZDB-GENE-060421-5714 | parppb           |
| ENSDARG00000086685 | 94.94352214 | -0.420305101 | 0.154396438 | -2.722246092 | 0.006483984 | 0.073101802 | trim63b          | ZDB-GENE-040426-1003 | trim63b          |
| ENSDARG00000000161 | 44.36567447 | 0.476737177  | 0.175175375 | 2.721485128  | 0.006498931 | 0.073230477 | itsn2a           | ZDB-GENE-041014-84   | itsn2a           |
| ENSDARG00000012355 | 66.89634455 | 0.568087053  | 0.208759575 | 2.721250284  | 0.00650355  | 0.073242698 | galnt8a.1        | ZDB-GENE-091015-4    | galnt8a.1        |
| ENSDARG00000060392 | 80.55660864 | -0.287581663 | 0.105696632 | -2.720821438 | 0.006511993 | 0.073297942 | ash2l            | ZDB-GENE-030131-494  | ash2l            |
| ENSDARG00000023768 | 18.85506797 | 0.612031573  | 0.225006659 | 2.720059826  | 0.006527011 | 0.073427098 | mfsd4aa          | ZDB-GENE-040426-1643 | mfsd4aa          |
| ENSDARG00000092718 | 10.10199239 | 0.818183936  | 0.3008445   | 2.719624047  | 0.006535618 | 0.073484803 | gbgt1l2          | ZDB-GENE-060531-71   | gbgt1l2          |
| ENSDARG00000007523 | 152.6788093 | 0.342446865  | 0.126010831 | 2.717598653  | 0.006575755 | 0.07386673  | kmt2e            | ZDB-GENE-030131-4120 | kmt2e            |
| ENSDARG00000096554 | 42.6588217  | -0.605850044 | 0.222940053 | -2.717546872 | 0.006576784 | 0.07386673  | si:dkey-25o16.4  | ZDB-GENE-030131-969  | si:dkey-25o16.4  |
| ENSDARG00000037158 | 48.35020535 | -0.639686443 | 0.235455786 | -2.716800695 | 0.006591629 | 0.073943498 | rcc1             | ZDB-GENE-040426-2216 | rcc1             |
| ENSDARG00000030110 | 47.98595101 | 0.498257602  | 0.183403678 | 2.716726339  | 0.00659311  | 0.073943498 | myod1            | ZDB-GENE-980526-561  | myod1            |
| ENSDARG00000012044 | 34.30155676 | -0.571869038 | 0.21050404  | -2.716665376 | 0.006594324 | 0.073943498 | polr3gla         | ZDB-GENE-040912-67   | polr3gla         |
| ENSDARG00000037917 | 88.20557773 | 0.39900144   | 0.146882407 | 2.716468555  | 0.006598246 | 0.073945297 | itga3a           | ZDB-GENE-090805-3    | itga3a           |
| ENSDARG00000105630 | 35.94440774 | 1.1059725    | 0.407161506 | 2.716299268  | 0.006601621 | 0.073945297 | alpk3b           | ZDB-GENE-121101-3    | alpk3b           |
| ENSDARG00000044204 | 408.5630239 | 0.596779169  | 0.219720322 | 2.716085445  | 0.006605887 | 0.073953098 | endou            | ZDB-GENE-070112-2012 | endou            |
| ENSDARG00000052673 | 216.4868417 | 0.203104058  | 0.074795817 | 2.715446758  | 0.006618642 | 0.074055883 | sept7b           | ZDB-GENE-030131-37   | sept7b           |
| ENSDARG00000060668 | 32.31206977 | 0.465321271  | 0.171379759 | 2.715147192  | 0.006624632 | 0.074082905 | tm4sf18          | ZDB-GENE-050208-690  | tm4sf18          |
| ENSDARG00000079378 | 120.5807471 | -0.33043138  | 0.121720633 | -2.714670246 | 0.006634179 | 0.074149655 | phldb1b          | ZDB-GENE-121114-8    | phldb1b          |
| ENSDARG00000052536 | 142.654189  | -0.320620074 | 0.118133991 | -2.714037426 | 0.006646866 | 0.074251402 | tia1             | ZDB-GENE-030131-1506 | tia1             |
| ENSDARG00000101707 | 29.95184956 | -0.69011405  | 0.254387755 | -2.712843036 | 0.00667087  | 0.074423572 | si:ch211-156b7.4 | ZDB-GENE-141212-376  | si:ch211-156b7.4 |
| ENSDARG00000078238 | 13.57343185 | 0.641517985  | 0.236475271 | 2.712833277  | 0.006671066 | 0.074423572 | nacc1b           | ZDB-GENE-121212-1    | nacc1b           |
| ENSDARG00000043102 | 153.7099293 | 0.576665958  | 0.21259812  | 2.712469689  | 0.006678389 | 0.074423572 | lxn              | ZDB-GENE-041212-18   | lxn              |
| ENSDARG00000036069 | 33.31876687 | -0.53663605  | 0.197844273 | -2.712416398 | 0.006679463 | 0.074423572 | ddx39b           | ZDB-GENE-040426-1259 | ddx39b           |
| ENSDARG00000096927 | 1.071004791 | 2.97401739   | 1.09653406  | 2.712197914  | 0.006683867 | 0.074423572 | si:ch211-210b2.3 | ZDB-GENE-131122-13   | si:ch211-210b2.3 |
| ENSDARG00000074750 | 111.2084875 | 0.283093259  | 0.104387357 | 2.711949667  | 0.006688875 | 0.074423572 | qser1            | ZDB-GENE-030131-2978 | qser1            |
| ENSDARG00000074634 | 61.43886    | 0.436949892  | 0.161137021 | 2.711666688  | 0.006694587 | 0.074423572 | keap1b           | ZDB-GENE-080508-1    | keap1b           |
| ENSDARG00000061896 | 168.2407073 | -0.601239986 | 0.221727331 | -2.711618745 | 0.006695555 | 0.074423572 | slco2a1          | ZDB-GENE-060606-3    | slco2a1          |
| ENSDARG00000010641 | 905.053016  | -0.396064998 | 0.146068371 | -2.71150418  | 0.00669787  | 0.074423572 | slc20a1b         | ZDB-GENE-030131-260  | slc20a1b         |
| ENSDARG00000074120 | 83.14815919 | -0.506296491 | 0.186722737 | -2.711488159 | 0.006698193 | 0.074423572 | usp2b            | ZDB-GENE-100208-2    | usp2b            |
| ENSDARG00000005254 | 472.6626159 | -0.379689035 | 0.140077102 | -2.710571754 | 0.006716731 | 0.074589554 | kdelr2a          | ZDB-GENE-030826-32   | kdelr2a          |
| ENSDARG00000043182 | 23.29443898 | -0.704769703 | 0.260052097 | -2.710109675 | 0.006726096 | 0.074653545 | hhla2a.1         | ZDB-GENE-050327-45   | hhla2a.1         |
| ENSDARG00000044492 | 7.675035561 | -0.972493106 | 0.358876175 | -2.709829106 | 0.006731788 | 0.074676722 | ublcp1           | ZDB-GENE-040718-3    | ublcp1           |
| ENSDARG00000043976 | 522.5210773 | -0.36683432  | 0.135397529 | -2.709313252 | 0.006742265 | 0.074730848 | etf1b            | ZDB-GENE-021029-1    | etf1b            |
| ENSDARG00000099116 | 97.24771806 | 0.377825637  | 0.139458485 | 2.70923378   | 0.00674388  | 0.074730848 | nagk             | ZDB-GENE-070928-19   | nagk             |
| ENSDARG00000101160 | 870.8342513 | -0.696693945 | 0.257322217 | -2.707476846 | 0.00677968  | 0.075039549 | apoa4a           | ZDB-GENE-050417-469  | apoa4a           |
| ENSDARG00000027495 | 1.052962738 | -2.820056933 | 1.041605939 | -2.707412495 | 0.006780994 | 0.075039549 | elovl4b          | ZDB-GENE-030131-7672 | elovl4b          |
| ENSDARG00000102665 | 8.578974299 | 0.758337427  | 0.280104885 | 2.707333819  | 0.006782602 | 0.075039549 | CABZ01033180.1   |                      |                  |
| ENSDARG00000044550 | 36.05045839 | -0.73429329  | 0.271285744 | -2.706715356 | 0.006795249 | 0.075139357 | hif1al2          | ZDB-GENE-050211-2    | hif1al2          |
| ENSDARG00000056138 | 708.6531073 | 0.25131015   | 0.092859993 | 2.706333937  | 0.00680306  | 0.075185603 | sf3b1            | ZDB-GENE-040827-3    | sf3b1            |
| ENSDARG00000058503 | 10.79870197 | 0.761316046  | 0.281364223 | 2.705802603  | 0.006813954 | 0.075265856 | flt3             | ZDB-GENE-050114-4    | flt3             |
| ENSDARG00000062402 | 52.62023807 | 0.559757521  | 0.206899829 | 2.705451833  | 0.006821154 | 0.075305249 | frem1b           | ZDB-GENE-050208-783  | frem1b           |
| ENSDARG00000076386 | 498.1557619 | 0.414015099  | 0.153058742 | 2.704942515  | 0.006831621 | 0.075380645 | epdl1            | ZDB-GENE-090710-3    | epdl1            |
| ENSDARG00000069920 | 78.03966524 | -0.417474222 | 0.154390533 | -2.704014392 | 0.006850732 | 0.075529096 | cox17            | ZDB-GENE-040912-91   | cox17            |
| ENSDARG00000003750 | 67.65109241 | -0.368881036 | 0.13642377  | -2.703935221 | 0.006852365 | 0.075529096 | pfas             | ZDB-GENE-030131-4420 | pfas             |
| ENSDARG00000039459 | 246.6290034 | 0.427862421  | 0.158267262 | 2.703417083  | 0.006863057 | 0.075569898 | qsox1            | ZDB-GENE-030131-7019 | qsox1            |

|                     |             |              |             |              |             |             |                   |                      |                   |
|---------------------|-------------|--------------|-------------|--------------|-------------|-------------|-------------------|----------------------|-------------------|
| ENSDARG00000086445  | 3.600966208 | -1.570468461 | 0.580943356 | -2.70330738  | 0.006865323 | 0.075569898 | adgrf7            | ZDB-GENE-041001-214  | adgrf7            |
| ENSDARG00000013576  | 9.022268118 | -0.874391952 | 0.323462411 | -2.703225849 | 0.006867007 | 0.075569898 | gadd45bb          | ZDB-GENE-050223-1    | gadd45bb          |
| ENSDARG00000055678  | 615.4673822 | 0.301926449  | 0.111731053 | 2.702260833  | 0.006886971 | 0.07570865  | akap12b           | ZDB-GENE-030131-9753 | akap12b           |
| ENSDARG000000104034 | 21.56236765 | -0.877444713 | 0.324724377 | -2.702121473 | 0.006889859 | 0.07570865  | arid3b            | ZDB-GENE-070209-182  | arid3b            |
| ENSDARG00000042796  | 88.64776709 | 0.279743158  | 0.103531796 | 2.702002372  | 0.006892327 | 0.07570865  | yy1a              | ZDB-GENE-030131-1117 | yy1a              |
| ENSDARG00000001857  | 184.601249  | -0.331759573 | 0.122792026 | -2.701800636 | 0.00689651  | 0.07570865  | aff4              | ZDB-GENE-100910-5    | aff4              |
| ENSDARG00000000966  | 525.5635751 | 0.249268525  | 0.092262407 | 2.701734449  | 0.006897883 | 0.07570865  | ncor2             | ZDB-GENE-030616-81   | ncor2             |
| ENSDARG000000102159 | 1.016868565 | 2.681317521  | 0.99280647  | 2.700745415  | 0.006918427 | 0.0758825   | ly6m6             | ZDB-GENE-131127-630  | ly6m6             |
| ENSDARG00000038422  | 54.32177312 | -0.627941489 | 0.23251757  | -2.70061952  | 0.006921046 | 0.0758825   | entpd4            | ZDB-GENE-040718-116  | entpd4            |
| ENSDARG00000076155  | 25.25773782 | -0.526165571 | 0.194921994 | -2.699364806 | 0.006947198 | 0.076097119 | mtppap            | ZDB-GENE-101208-3    | mtppap            |
| ENSDARG00000057093  | 315.7771408 | 0.190564452  | 0.070596997 | 2.69932801   | 0.006947966 | 0.076097119 | kdm5ba            | ZDB-GENE-030131-5379 | kdm5ba            |
| ENSDARG00000022430  | 90.5997769  | -0.302054887 | 0.11195147  | -2.698087728 | 0.006973906 | 0.076340877 | ppp1r8b           | ZDB-GENE-040426-1271 | ppp1r8b           |
| ENSDARG00000090900  | 109.6971046 | -0.909283441 | 0.337065834 | -2.697643458 | 0.006983219 | 0.076402461 | apnl              | ZDB-GENE-030131-8907 | apnl              |
| ENSDARG00000032997  | 58.63346916 | 0.41797213   | 0.154963659 | 2.697226768  | 0.006991964 | 0.07645777  | rnf185            | ZDB-GENE-040426-1977 | rnf185            |
| ENSDARG00000099445  | 65.98265458 | 0.329942738  | 0.122353465 | 2.696635833  | 0.007004382 | 0.076522434 | cc2d1b            | ZDB-GENE-030131-1426 | cc2d1b            |
| ENSDARG00000096110  | 75.26534518 | 0.47078036   | 0.174591083 | 2.696474253  | 0.007007781 | 0.076522434 | zgc:123278        | ZDB-GENE-051127-21   | zgc:123278        |
| ENSDARG00000060006  | 257.1673001 | 0.352088967  | 0.130576636 | 2.696416278  | 0.007009001 | 0.076522434 | nedd4l            | ZDB-GENE-051118-2    | nedd4l            |
| ENSDARG00000004517  | 65.7742426  | -0.450477419 | 0.167081408 | -2.696155274 | 0.007014496 | 0.076522434 | ppat              | ZDB-GENE-041210-323  | ppat              |
| ENSDARG00000088911  | 58.20286866 | 0.641204486  | 0.237835266 | 2.696002554  | 0.007017713 | 0.076522434 | cbnl17            | ZDB-GENE-111109-4    | cbnl17            |
| ENSDARG00000092240  | 70.10659343 | 0.40082535   | 0.148680026 | 2.695892388  | 0.007020034 | 0.076522434 | si:ch211-243a20.3 |                      |                   |
| ENSDARG00000028131  | 23.9983871  | -0.509409092 | 0.188990332 | -2.695424083 | 0.00702991  | 0.076589792 | hccsa.1           | ZDB-GENE-040718-202  | hccsa.1           |
| ENSDARG00000095453  | 8.638203809 | 1.030975549  | 0.382526558 | 2.69517378   | 0.007035193 | 0.076607077 | si:rp71-17i16.6   | ZDB-GENE-090313-410  | si:rp71-17i16.6   |
| ENSDARG00000076913  | 8.306156206 | -0.991263437 | 0.367916391 | -2.694262778 | 0.007054452 | 0.076753565 | eme1              | ZDB-GENE-030131-3191 | eme1              |
| ENSDARG00000086057  | 33.37372386 | 0.671964544  | 0.249441133 | 2.69388026   | 0.007062553 | 0.076753565 | plxnd1            | ZDB-GENE-040426-1828 | plxnd1            |
| ENSDARG00000088082  | 16.98874144 | 0.721515204  | 0.267854928 | 2.693679032  | 0.007066818 | 0.076753565 | si:ch211-214c20.1 | ZDB-GENE-081103-49   | si:ch211-214c20.1 |
| ENSDARG000000105241 | 11.29042039 | 0.955724082  | 0.354820291 | 2.693544047  | 0.00706968  | 0.076753565 | btr26             | ZDB-GENE-070705-378  | btr26             |
| ENSDARG00000042980  | 132.1570314 | 0.582396056  | 0.216235601 | 2.693340288  | 0.007074003 | 0.076753565 | cyp2p7            | ZDB-GENE-041001-155  | cyp2p7            |
| ENSDARG00000059054  | 263.9016056 | -0.712006596 | 0.264358598 | -2.693336249 | 0.007074089 | 0.076753565 | pdk2b             | ZDB-GENE-040426-939  | pdk2b             |
| ENSDARG00000011945  | 81.10987961 | -0.409502154 | 0.152048615 | -2.693231721 | 0.007076307 | 0.076753565 | slc35e1           | ZDB-GENE-040426-2033 | slc35e1           |
| ENSDARG000000105816 | 12.12723211 | 0.682681933  | 0.253489314 | 2.693138901  | 0.007078277 | 0.076753565 | BX855614.4        |                      |                   |
| ENSDARG00000040990  | 44.31362553 | -0.507336655 | 0.188400605 | -2.692861067 | 0.007084178 | 0.076777375 | usp37             | ZDB-GENE-061013-802  | usp37             |
| ENSDARG00000011801  | 7.32686761  | -0.92014742  | 0.341753323 | -2.692431524 | 0.00709331  | 0.07678108  | wars2             | ZDB-GENE-050306-26   | wars2             |
| ENSDARG000000116806 | 229.9759762 | -0.503020002 | 0.186829008 | -2.692408456 | 0.007093801 | 0.07678108  | CU693479.1        |                      |                   |
| ENSDARG00000099547  | 142.3768366 | 0.345670432  | 0.128391183 | 2.692322195  | 0.007095636 | 0.07678108  | nbeal1            | ZDB-GENE-130530-544  | nbeal1            |
| ENSDARG00000039429  | 376.4617363 | -0.354220507 | 0.131576211 | -2.69213183  | 0.007099688 | 0.076784825 | adka              | ZDB-GENE-030425-3    | adka              |
| ENSDARG00000098247  | 9.477562577 | -0.862035563 | 0.32026772  | -2.691609263 | 0.00711082  | 0.07686511  | det1              | ZDB-GENE-030131-2809 | det1              |
| ENSDARG00000006683  | 116.0721896 | 0.301692806  | 0.112148492 | 2.690119145  | 0.007142651 | 0.077168936 | arhgef6           | ZDB-GENE-101013-2    | arhgef6           |
| ENSDARG000000103586 | 14.34007841 | 0.915566581  | 0.340473744 | 2.689095994  | 0.007164581 | 0.077365531 | si:dkey-65j6.2    | ZDB-GENE-090313-319  | si:dkey-65j6.2    |
| ENSDARG00000099186  | 328.5625827 | -0.326501352 | 0.121474334 | -2.687821706 | 0.007191979 | 0.077620928 | slc1a5            | ZDB-GENE-070501-4    | slc1a5            |
| ENSDARG00000092667  | 12.87327098 | 0.795120112  | 0.295970968 | 2.68648009   | 0.007220925 | 0.07789277  | si:ch211-271e10.2 | ZDB-GENE-060526-146  | si:ch211-271e10.2 |
| ENSDARG00000031768  | 75.12804862 | 0.434256437  | 0.161672565 | 2.686024288  | 0.007230783 | 0.077918003 | rora              | ZDB-GENE-060306-2    | rora              |
| ENSDARG00000078757  | 654.204944  | 0.568580896  | 0.211681224 | 2.686024221  | 0.007230785 | 0.077918003 | si:ch211-212c13.8 | ZDB-GENE-131118-28   | si:ch211-212c13.8 |
| ENSDARG00000059348  | 11.89072209 | 0.690085337  | 0.256935684 | 2.685829097  | 0.007235009 | 0.077922997 | rxfp3.3b          | ZDB-GENE-121030-6    | rxfp3.3b          |
| ENSDARG00000044820  | 44.07314663 | -0.412932722 | 0.153758482 | -2.685593118 | 0.00724012  | 0.077937538 | cstf1             | ZDB-GENE-030131-2958 | cstf1             |
| ENSDARG00000026801  | 1290.873185 | 0.232103286  | 0.086438861 | 2.68517289   | 0.00724923  | 0.077995086 | stau2             | ZDB-GENE-040426-687  | stau2             |
| ENSDARG00000003776  | 109.5084174 | 0.249312092  | 0.092876618 | 2.684336451  | 0.007267393 | 0.078135022 | pip4k2aa          | ZDB-GENE-080721-18   | pip4k2aa          |

|                    |             |              |             |              |             |             |                    |                      |                    |
|--------------------|-------------|--------------|-------------|--------------|-------------|-------------|--------------------|----------------------|--------------------|
| ENSDARG00000057286 | 41.75978436 | 0.371346776  | 0.138344038 | 2.6842268    | 0.007269777 | 0.078135022 | swap70b            | ZDB-GENE-030131-3587 | swap70b            |
| ENSDARG00000003217 | 90.51919094 | -0.482905719 | 0.179927162 | -2.683895599 | 0.007276983 | 0.078140562 | urb2               | ZDB-GENE-030131-2621 | urb2               |
| ENSDARG00000095462 | 738.0397916 | 0.658906655  | 0.245507412 | 2.683856467  | 0.007277834 | 0.078140562 | CELA1 (1 of many)  | ZDB-GENE-050208-732  | si:key-57c15.4     |
| ENSDARG00000008461 | 28.23901367 | -0.575647934 | 0.214516223 | -2.68347039  | 0.007286243 | 0.078164917 | anapc5             | ZDB-GENE-030131-1574 | anapc5             |
| ENSDARG00000088975 | 20.2399517  | 0.580235146  | 0.216234574 | 2.683359723  | 0.007288655 | 0.078164917 | si:ch211-14k19.8   | ZDB-GENE-051214-4    | si:ch211-14k19.8   |
| ENSDARG00000030759 | 12.71626973 | -0.896339877 | 0.334052208 | -2.683232911 | 0.007291419 | 0.078164917 | melk               | ZDB-GENE-990603-5    | melk               |
| ENSDARG00000099684 | 5.805490455 | 1.189251574  | 0.44329341  | 2.682763941  | 0.007301651 | 0.078234132 | trim35-24          | ZDB-GENE-060421-8366 | trim35-24          |
| ENSDARG00000093844 | 4462.054517 | -0.892943521 | 0.332921205 | -2.682146731 | 0.007315137 | 0.07833812  | zgc:136461         | ZDB-GENE-060519-7    | zgc:136461         |
| ENSDARG00000042850 | 4.196187534 | 1.253976269  | 0.46756809  | 2.68191157   | 0.007320281 | 0.078352716 | nphs2              | ZDB-GENE-051102-2    | nphs2              |
| ENSDARG00000016496 | 91.73203079 | -0.442750709 | 0.165114828 | -2.681471517 | 0.007329915 | 0.078415337 | cdk8               | ZDB-GENE-030903-2    | cdk8               |
| ENSDARG00000058297 | 138.6683955 | -0.49627971  | 0.185089334 | -2.681298265 | 0.007333712 | 0.078415467 | timm13             | ZDB-GENE-040718-167  | timm13             |
| ENSDARG00000103480 | 5.668931228 | 2.164506365  | 0.807358807 | 2.680972012  | 0.007340866 | 0.078451478 | BX640512.3         |                      |                    |
| ENSDARG00000045675 | 11.63235493 | 0.762641394  | 0.284492486 | 2.680708389  | 0.007346651 | 0.078464298 | mdm1               | ZDB-GENE-041210-117  | mdm1               |
| ENSDARG00000055270 | 36.7755383  | 0.393099891  | 0.146647747 | 2.680572317  | 0.007349638 | 0.078464298 | si:ch1073-358c10.1 | ZDB-GENE-050309-123  | si:ch1073-358c10.1 |
| ENSDARG00000012234 | 126.5412159 | -0.449984669 | 0.167900525 | -2.680067075 | 0.007360741 | 0.078542365 | psme3              | ZDB-GENE-991110-19   | psme3              |
| ENSDARG00000103164 | 2.250020557 | -1.590256468 | 0.593404229 | -2.679887317 | 0.007364695 | 0.078544109 | zgc:194948         | ZDB-GENE-081022-167  | zgc:194948         |
| ENSDARG00000039900 | 32.29668449 | 0.50386746   | 0.188188789 | 2.677457373  | 0.007418329 | 0.07907542  | si:ch73-168d20.1   | ZDB-GENE-121214-44   | si:ch73-168d20.1   |
| ENSDARG00000040864 | 27.18030047 | 0.539973944  | 0.201719401 | 2.676856768  | 0.00743164  | 0.079169479 | si:dkey-286j15.1   | ZDB-GENE-060503-447  | si:dkey-286j15.1   |
| ENSDARG00000099846 | 19.72387324 | 0.561019998  | 0.209592761 | 2.676714571  | 0.007434794 | 0.079169479 | si:ch211-154o6.3   | ZDB-GENE-030131-1030 | si:ch211-154o6.3   |
| ENSDARG00000057529 | 26.03775427 | -0.625863491 | 0.234055436 | -2.673996822 | 0.007495316 | 0.079739026 | itpa               | ZDB-GENE-070705-218  | itpa               |
| ENSDARG00000043180 | 1231.154036 | -0.405530838 | 0.151658863 | -2.673967284 | 0.007495976 | 0.079739026 | gpd1b              | ZDB-GENE-030131-3906 | gpd1b              |
| ENSDARG00000043581 | 40.57728602 | 0.706065119  | 0.264091471 | 2.673562752  | 0.007505023 | 0.079770212 | gadd45aa           | ZDB-GENE-040426-1501 | gadd45aa           |
| ENSDARG00000067992 | 1.67242295  | 2.143490748  | 0.801791715 | 2.673376026  | 0.007509203 | 0.079770212 | si:dkey-31e10.1    | ZDB-GENE-060503-356  | si:dkey-31e10.1    |
| ENSDARG00000088263 | 20.04868754 | -0.66307176  | 0.248033066 | -2.673320011 | 0.007510457 | 0.079770212 | zgc:174356         | ZDB-GENE-080215-21   | zgc:174356         |
| ENSDARG00000014348 | 128.8468632 | 0.283724373  | 0.106175613 | 2.672217905  | 0.00753517  | 0.079972522 | stk17b             | ZDB-GENE-040426-1499 | stk17b             |
| ENSDARG00000037556 | 66.77492001 | -0.362948313 | 0.13582752  | -2.672126493 | 0.007537223 | 0.079972522 | st3gal5            | ZDB-GENE-060322-1    | st3gal5            |
| ENSDARG00000044039 | 17.70331105 | -0.596952651 | 0.223477643 | -2.671196295 | 0.007558143 | 0.080153452 | stx11a             | ZDB-GENE-040426-2564 | stx11a             |
| ENSDARG00000037872 | 154.0467273 | 0.40939037   | 0.153274125 | 2.670968576  | 0.007563273 | 0.080165703 | foxk1              | ZDB-GENE-030131-6402 | foxk1              |
| ENSDARG00000004169 | 61.70439471 | -0.542017838 | 0.202942007 | -2.670801603 | 0.007567036 | 0.080165703 | stmn1a             | ZDB-GENE-031006-14   | stmn1a             |
| ENSDARG00000040566 | 44.61973229 | 0.42815593   | 0.16039601  | 2.669367713  | 0.00759942  | 0.080463243 | phykpl             | ZDB-GENE-051127-33   | phykpl             |
| ENSDARG00000098118 | 178.7034496 | 0.35150468   | 0.131694264 | 2.669096361  | 0.007605563 | 0.080463243 | trappc10           | ZDB-GENE-131115-1    | trappc10           |
| ENSDARG00000007708 | 1560.198034 | 0.357399333  | 0.133907102 | 2.669009548  | 0.007607529 | 0.080463243 | nsa2               | ZDB-GENE-030131-488  | nsa2               |
| ENSDARG00000103118 | 55.39918096 | 0.61385513   | 0.230005491 | 2.668871629  | 0.007610653 | 0.080463243 | cib1               | ZDB-GENE-050417-170  | cib1               |
| ENSDARG00000032010 | 606.6516284 | 0.552437884  | 0.207078517 | 2.667770139  | 0.007635648 | 0.08068633  | slc15a2            | ZDB-GENE-030131-5866 | slc15a2            |
| ENSDARG00000007065 | 72.33419338 | -0.395486309 | 0.148268405 | -2.667367398 | 0.007644805 | 0.080741921 | mrps18b            | ZDB-GENE-050417-278  | mrps18b            |
| ENSDARG00000001729 | 247.9835275 | -0.235302412 | 0.088225745 | -2.667049319 | 0.007652044 | 0.08074888  | strn3              | ZDB-GENE-030616-405  | strn3              |
| ENSDARG00000104834 | 10.60343488 | 0.691835543  | 0.259408974 | 2.666968424  | 0.007653886 | 0.08074888  | ANO7               | ZDB-GENE-131125-81   | si:dkey-83h2.5     |
| ENSDARG00000075263 | 52.25219998 | -0.754338239 | 0.28286005  | -2.666824956 | 0.007657154 | 0.08074888  | ankrd1a            | ZDB-GENE-100405-1    | ankrd1a            |
| ENSDARG00000101222 | 2.743515713 | -1.591018169 | 0.596661846 | -2.666532442 | 0.007663821 | 0.080778076 | oscp1a             | ZDB-GENE-080204-2    | oscp1a             |
| ENSDARG00000059029 | 4.678254424 | -1.069520998 | 0.401240546 | -2.665535697 | 0.007686577 | 0.080976741 | mmp28              | ZDB-GENE-100226-1    | mmp28              |
| ENSDARG00000055314 | 65.14123147 | -0.441799111 | 0.165784201 | -2.664904786 | 0.007701012 | 0.081068152 | mcmbp              | ZDB-GENE-030131-9676 | mcmbp              |
| ENSDARG00000004574 | 15.9924106  | -0.660154423 | 0.247729966 | -2.664814572 | 0.007703078 | 0.081068152 | gtf3c2             | ZDB-GENE-041014-349  | gtf3c2             |
| ENSDARG00000100635 | 13992.16604 | 0.682228748  | 0.256041202 | 2.664527208  | 0.007709663 | 0.08108048  | chia.1             | ZDB-GENE-040426-1994 | chia.1             |
| ENSDARG00000114063 | 285.1826125 | 0.563705182  | 0.211569228 | 2.664400616  | 0.007712565 | 0.08108048  | parm1              | ZDB-GENE-140106-262  | parm1              |
| ENSDARG00000113961 | 6.290521894 | -1.08176959  | 0.406062097 | -2.664049658 | 0.007720616 | 0.08108048  | nudt15             | ZDB-GENE-040625-95   | nudt15             |
| ENSDARG00000076299 | 103.9045589 | 0.385508214  | 0.144708375 | 2.664035261  | 0.007720947 | 0.08108048  | FQ323119.1         |                      |                    |

|                     |             |              |             |              |             |             |                   |                      |                   |
|---------------------|-------------|--------------|-------------|--------------|-------------|-------------|-------------------|----------------------|-------------------|
| ENSDARG00000012563  | 34.93426785 | -0.674277874 | 0.25314319  | -2.663622411 | 0.007730428 | 0.08108048  | pdss2             | ZDB-GENE-040718-43   | pdss2             |
| ENSDARG00000078535  | 16.31085226 | 0.617171859  | 0.231711942 | 2.663530644  | 0.007732537 | 0.08108048  | lrrcc1            | ZDB-GENE-041111-207  | lrrcc1            |
| ENSDARG00000079167  | 70.64168452 | 0.350741059  | 0.13168371  | 2.663511376  | 0.00773298  | 0.08108048  | si:ch211-230g15.5 | ZDB-GENE-091204-280  | si:ch211-230g15.5 |
| ENSDARG00000077620  | 60.7239628  | -0.656483647 | 0.246483358 | -2.663399479 | 0.007735552 | 0.08108048  | cdca7a            | ZDB-GENE-050417-29   | cdca7a            |
| ENSDARG00000043046  | 90.92021853 | 0.304226691  | 0.11423563  | 2.663150631  | 0.007741275 | 0.081099447 | fbxl5             | ZDB-GENE-030131-900  | fbxl5             |
| ENSDARG00000041223  | 18.13107977 | -0.597067623 | 0.224249647 | -2.662513104 | 0.007755955 | 0.081212177 | fam173a           | ZDB-GENE-040625-59   | fam173a           |
| ENSDARG00000087346  | 50.99510493 | -0.476912359 | 0.179151788 | -2.662057488 | 0.007766461 | 0.081281117 | rap1ab            | ZDB-GENE-040426-2738 | rap1ab            |
| ENSDARG00000055426  | 16.78755021 | -0.568417    | 0.213575574 | -2.661432616 | 0.007780891 | 0.081361163 | rwdd2b            | ZDB-GENE-041001-119  | rwdd2b            |
| ENSDARG00000061024  | 36.32068834 | -0.461456303 | 0.17338945  | -2.661386276 | 0.007781962 | 0.081361163 | rabggt            | ZDB-GENE-060929-1042 | rabggt            |
| ENSDARG000000102555 | 338.8471263 | 0.318156501  | 0.119570713 | 2.660822983  | 0.007794993 | 0.081456297 | si:dkey-33i11.9   | ZDB-GENE-060503-262  | si:dkey-33i11.9   |
| ENSDARG00000002031  | 37.28681014 | -0.522925375 | 0.19658532  | -2.660042846 | 0.007813071 | 0.081640463 | tox4a             | ZDB-GENE-070912-576  | tox4a             |
| ENSDARG00000020979  | 35.42852129 | -0.577225127 | 0.217023038 | -2.659741249 | 0.00782007  | 0.081636019 | ripor3            | ZDB-GENE-050220-13   | ripor3            |
| ENSDARG00000068460  | 22.22811559 | 0.666795355  | 0.250743156 | 2.659276394  | 0.007830869 | 0.081707589 | otog              | ZDB-GENE-120228-1    | otog              |
| ENSDARG00000070214  | 328.4396724 | -0.500518886 | 0.188250869 | -2.658786587 | 0.007842262 | 0.081785282 | slc41a1           | ZDB-GENE-030131-4700 | slc41a1           |
| ENSDARG00000074540  | 3.917507087 | -1.304642102 | 0.490962645 | -2.65731439  | 0.007876595 | 0.082082323 | gpr63             | ZDB-GENE-110411-183  | gpr63             |
| ENSDARG00000015111  | 174.254451  | -0.448601937 | 0.168833762 | -2.657062968 | 0.007882472 | 0.082082323 | ddx39ab           | ZDB-GENE-040426-2902 | ddx39ab           |
| ENSDARG00000061989  | 14.41911645 | 0.594843251  | 0.223873034 | 2.657056278  | 0.007882628 | 0.082082323 | mpnd              | ZDB-GENE-060929-1162 | mpnd              |
| ENSDARG00000031046  | 45.81109745 | 0.543394698  | 0.204536851 | 2.656708048  | 0.007890775 | 0.082125882 | nr1h5             | ZDB-GENE-080403-3    | nr1h5             |
| ENSDARG000000109310 | 2.27210296  | 1.886387051  | 0.710134489 | 2.656379998  | 0.007898456 | 0.082164557 | im:7150988        | ZDB-GENE-050309-169  | im:7150988        |
| ENSDARG00000056427  | 110.4850024 | 0.408702732  | 0.153942503 | 2.654905071  | 0.007933073 | 0.082470023 | auts2a            | ZDB-GENE-030616-571  | auts2a            |
| ENSDARG00000002917  | 35.87938028 | -0.550052658 | 0.207192531 | -2.654789993 | 0.00793578  | 0.082470023 | gls2b             | ZDB-GENE-050208-408  | gls2b             |
| ENSDARG00000087697  | 924.6478031 | -0.478593159 | 0.180401375 | -2.652935209 | 0.007979519 | 0.082883    | lpl               | ZDB-GENE-990415-139  | lpl               |
| ENSDARG00000016706  | 176.044119  | -0.419865755 | 0.15830891  | -2.652192824 | 0.007997086 | 0.083023853 | atic              | ZDB-GENE-011212-4    | atic              |
| ENSDARG00000087752  | 11.46825498 | -0.955535382 | 0.360355745 | -2.651644648 | 0.008010079 | 0.083117109 | rfwd3             | ZDB-GENE-120529-1    | rfwd3             |
| ENSDARG00000078178  | 152.2771604 | 0.55622299   | 0.209786262 | 2.651379483  | 0.008016372 | 0.083140767 | art4              | ZDB-GENE-070725-5    | art4              |
| ENSDARG00000004130  | 16.37020186 | -1.106060715 | 0.417273806 | -2.650683312 | 0.008032912 | 0.083270639 | mvk               | ZDB-GENE-041114-37   | mvk               |
| ENSDARG00000094489  | 21.38205874 | 1.392341796  | 0.525391831 | 2.650101724  | 0.008046754 | 0.083355342 | si:dkey-58f10.6   | ZDB-GENE-060526-320  | si:dkey-58f10.6   |
| ENSDARG00000058603  | 290.7036377 | 0.512156984  | 0.193266637 | 2.650002043  | 0.008049128 | 0.083355342 | jph1a             | ZDB-GENE-040724-233  | jph1a             |
| ENSDARG00000077943  | 20.73095949 | -0.708453766 | 0.267385071 | -2.649563659 | 0.008059579 | 0.083421873 | ints5             | ZDB-GENE-090908-2    | ints5             |
| ENSDARG00000042308  | 45.57311535 | 0.384761544  | 0.145293857 | 2.64816112   | 0.008093094 | 0.08372696  | arhgef18b         | ZDB-GENE-070705-462  | arhgef18b         |
| ENSDARG00000018923  | 162.2243706 | -0.457524318 | 0.172848659 | -2.646964814 | 0.00812178  | 0.083981802 | fat2              | ZDB-GENE-111031-1    | fat2              |
| ENSDARG00000099458  | 137.0268394 | 0.27661221   | 0.104522916 | 2.646426455  | 0.008134719 | 0.084069853 | ddx46             | ZDB-GENE-030131-667  | ddx46             |
| ENSDARG00000017314  | 39392.55521 | 0.60590798   | 0.228966539 | 2.646273041  | 0.00813841  | 0.084069853 | CELA1 (1 of many) | ZDB-GENE-040808-55   | zgc:92041         |
| ENSDARG00000074337  | 35.45160072 | 0.462735329  | 0.174951073 | 2.644941357  | 0.008170508 | 0.084337344 | cbfa2t2           | ZDB-GENE-070209-1    | cbfa2t2           |
| ENSDARG00000059857  | 16.37831098 | -0.607864904 | 0.229828663 | -2.644861163 | 0.008172444 | 0.084337344 | blvra             | ZDB-GENE-060929-312  | blvra             |
| ENSDARG00000052334  | 159.8099138 | -0.311750645 | 0.11790769  | -2.644023003 | 0.008192709 | 0.084504386 | ociad1            | ZDB-GENE-040426-1100 | ociad1            |
| ENSDARG00000015575  | 370.1845626 | 0.381948943  | 0.144493093 | 2.643371624  | 0.008208489 | 0.084625026 | cyp3c1            | ZDB-GENE-030131-3060 | cyp3c1            |
| ENSDARG00000061185  | 37.55758131 | 0.39865145   | 0.150843463 | 2.642815544  | 0.008221981 | 0.084683829 | nat15             | ZDB-GENE-041111-143  | nat15             |
| ENSDARG00000010445  | 86.10908731 | -0.420103582 | 0.158961566 | -2.642799714 | 0.008222366 | 0.084683829 | trabd             | ZDB-GENE-030131-1301 | trabd             |
| ENSDARG00000001870  | 2691.299156 | 0.477207526  | 0.18081339  | 2.639226698  | 0.008309539 | 0.085520598 | atp1a1a.4         | ZDB-GENE-001212-4    | atp1a1a.4         |
| ENSDARG000000102145 | 7.204450791 | -0.814000424 | 0.308434927 | -2.639131803 | 0.008311866 | 0.085520598 | ccdc77            | ZDB-GENE-050913-54   | ccdc77            |
| ENSDARG00000038153  | 3141.938826 | 0.427492018  | 0.161996913 | 2.638889899  | 0.008317799 | 0.085539172 | lgals2b           | ZDB-GENE-040426-1590 | lgals2b           |
| ENSDARG00000006849  | 6.476635129 | 1.029788142  | 0.390305105 | 2.638418326  | 0.008329376 | 0.085615741 | asic2             | ZDB-GENE-040513-4    | asic2             |
| ENSDARG00000007723  | 48.85890695 | 0.417157281  | 0.158166513 | 2.637456398  | 0.008353036 | 0.08581637  | efnb1             | ZDB-GENE-010618-2    | efnb1             |
| ENSDARG00000074756  | 103.340045  | -0.316670883 | 0.120086045 | -2.637033158 | 0.008363466 | 0.085880939 | tfb2m             | ZDB-GENE-070521-3    | tfb2m             |
| ENSDARG000000104353 | 268.9628975 | -0.418399677 | 0.158678045 | -2.636783666 | 0.008369619 | 0.085901557 | nop58             | ZDB-GENE-040426-2140 | nop58             |

|                    |             |              |             |              |             |             |                   |                      |                   |
|--------------------|-------------|--------------|-------------|--------------|-------------|-------------|-------------------|----------------------|-------------------|
| ENSDARG00000061108 | 216.3366089 | 0.281151729  | 0.106633915 | 2.636607017  | 0.008373978 | 0.08590375  | ep300b            | ZDB-GENE-080403-15   | ep300b            |
| ENSDARG00000091912 | 6.465235154 | 1.83277269   | 0.695319331 | 2.635871905  | 0.008392141 | 0.08603265  | si:ch211-15j1.5   | ZDB-GENE-081031-11   | si:ch211-15j1.5   |
| ENSDARG00000074148 | 27.57621001 | 0.610158206  | 0.231492105 | 2.635762485  | 0.008394847 | 0.08603265  | rbpjl             | ZDB-GENE-050307-4    | rbpjl             |
| ENSDARG00000043173 | 1996.667125 | 0.679871154  | 0.258092581 | 2.63421425   | 0.008433225 | 0.086383242 | CELA1 (1 of many) | ZDB-GENE-040801-12   | zgc:92745         |
| ENSDARG00000099124 | 13.66770688 | -0.771563637 | 0.292928616 | -2.633964708 | 0.008439426 | 0.086396032 | f3a               | ZDB-GENE-071119-5    | f3a               |
| ENSDARG00000036058 | 38.72445513 | 0.602004153  | 0.228566195 | 2.633828476  | 0.008442813 | 0.086396032 | gnao1b            | ZDB-GENE-040426-1693 | gnao1b            |
| ENSDARG00000010794 | 277.6055856 | 0.395712063  | 0.150255271 | 2.633598549  | 0.008448531 | 0.086405679 | tfeb              | ZDB-GENE-090807-3    | tfeb              |
| ENSDARG00000057414 | 409.7156427 | -0.429970074 | 0.16327562  | -2.633400349 | 0.008453464 | 0.086405679 | phb               | ZDB-GENE-030131-6577 | phb               |
| ENSDARG00000099825 | 12.17943224 | 0.69926031   | 0.265546477 | 2.633287845  | 0.008456265 | 0.086405679 | zgc:174944        | ZDB-GENE-080207-2    | zgc:174944        |
| ENSDARG00000116593 | 4.946214766 | 1.013407142  | 0.384899823 | 2.632911423  | 0.008465642 | 0.086449161 | BX323022.1        |                      |                   |
| ENSDARG00000022614 | 2.649331386 | -2.403460107 | 0.912897434 | -2.632782191 | 0.008468864 | 0.086449161 | ddx43             | ZDB-GENE-080204-77   | ddx43             |
| ENSDARG00000102805 | 339.3723093 | 0.569255826  | 0.216275918 | 2.632081423  | 0.008486352 | 0.086585027 | cyp2aa12          | ZDB-GENE-071004-47   | cyp2aa12          |
| ENSDARG00000042344 | 26.14367021 | -0.614375636 | 0.233464614 | -2.631557846 | 0.00849944  | 0.086630738 | trmt6             | ZDB-GENE-051120-141  | trmt6             |
| ENSDARG00000046141 | 18.57341994 | -0.578950575 | 0.220021912 | -2.63133144  | 0.008505105 | 0.086630738 | zgc:162025        | ZDB-GENE-070424-17   | zgc:162025        |
| ENSDARG00000021250 | 53.92396603 | -0.891620826 | 0.338872982 | -2.631135774 | 0.008510003 | 0.086630738 | slc25a48          | ZDB-GENE-040718-60   | slc25a48          |
| ENSDARG00000105438 | 11.69292516 | 0.894911048  | 0.340125919 | 2.631116884  | 0.008510476 | 0.086630738 | si:ch1073-220m6.1 | ZDB-GENE-160113-85   | si:ch1073-220m6.1 |
| ENSDARG00000015422 | 58.10846312 | 0.469553134  | 0.178464937 | 2.631066596  | 0.008511736 | 0.086630738 | ppil1             | ZDB-GENE-051009-1    | ppil1             |
| ENSDARG00000105287 | 1340.051307 | -0.417823964 | 0.158836749 | -2.630524532 | 0.008525322 | 0.086726419 | mpp1              | ZDB-GENE-031113-4    | mpp1              |
| ENSDARG00000057987 | 47.72649197 | -0.397627356 | 0.151209884 | -2.62963866  | 0.008547567 | 0.086843752 | uba3              | ZDB-GENE-040426-2825 | uba3              |
| ENSDARG00000040534 | 442.5963827 | -0.456429034 | 0.173572804 | -2.629611453 | 0.008548251 | 0.086843752 | epcam             | ZDB-GENE-040426-2209 | epcam             |
| ENSDARG00000054442 | 31.26321429 | 0.490571806  | 0.186566865 | 2.629469101  | 0.00855183  | 0.086843752 | cbx1b             | ZDB-GENE-040625-68   | cbx1b             |
| ENSDARG00000101055 | 10.18017549 | 0.954683448  | 0.363080619 | 2.629397981  | 0.008553619 | 0.086843752 | trim35-25         | ZDB-GENE-060503-484  | trim35-25         |
| ENSDARG00000080009 | 143.4730642 | 0.353944547  | 0.134640865 | 2.62880477   | 0.008568554 | 0.086944566 | bahcc1b           | ZDB-GENE-100716-2    | bahcc1b           |
| ENSDARG00000090988 | 33.0268053  | -0.54580922  | 0.207636996 | -2.628670379 | 0.00857194  | 0.086944566 | larsa             | ZDB-GENE-110411-16   | larsa             |
| ENSDARG00000054823 | 104.09892   | -0.361109251 | 0.137411714 | -2.627936435 | 0.008590457 | 0.087077025 | id3               | ZDB-GENE-020515-1    | id3               |
| ENSDARG00000055092 | 132.8066616 | -0.26547873  | 0.101028527 | -2.627760064 | 0.008594912 | 0.087077025 | pora              | ZDB-GENE-050809-121  | pora              |
| ENSDARG00000078026 | 225.8220399 | 0.277597057  | 0.105644471 | 2.627653424  | 0.008597606 | 0.087077025 | zcchc24           | ZDB-GENE-030131-3573 | zcchc24           |
| ENSDARG00000039880 | 51.17802644 | -0.408761351 | 0.155578623 | -2.627361923 | 0.008604976 | 0.087109089 | arpp19b           | ZDB-GENE-040426-930  | arpp19b           |
| ENSDARG00000090977 | 6.545439606 | 0.990824017  | 0.377170522 | 2.626992192  | 0.008614331 | 0.087139213 | ifit12            | ZDB-GENE-120406-2    | ifit12            |
| ENSDARG00000076839 | 3.928551988 | -1.487111359 | 0.566106275 | -2.626911989 | 0.008616362 | 0.087139213 | ftr86             | ZDB-GENE-060929-108  | ftr86             |
| ENSDARG00000026387 | 6.100669409 | 0.921783874  | 0.350938956 | 2.626621691  | 0.008623715 | 0.087171036 | pip4p1b           |                      |                   |
| ENSDARG00000036158 | 37.84964811 | -0.522943893 | 0.19911612  | -2.626326253 | 0.008631204 | 0.087195044 | nudcd1            | ZDB-GENE-050522-483  | nudcd1            |
| ENSDARG00000033231 | 1.74240993  | -6.406970698 | 2.439639111 | -2.626196092 | 0.008634506 | 0.087195044 | mcm6l             | ZDB-GENE-050913-141  | mcm6l             |
| ENSDARG00000102407 | 13.35557804 | -0.714518422 | 0.272115107 | -2.625794759 | 0.008644693 | 0.087254592 | cep97             | ZDB-GENE-031030-11   | cep97             |
| ENSDARG00000051710 | 46.77443332 | 0.405724444  | 0.154524483 | 2.625632104  | 0.008648824 | 0.087254592 | CR339041.1        |                      |                   |
| ENSDARG00000043821 | 170.2621356 | 0.340156586  | 0.12962251  | 2.624209221  | 0.008685042 | 0.08757734  | klf7b             | ZDB-GENE-041014-171  | klf7b             |
| ENSDARG00000076829 | 83.29784587 | 0.390584923  | 0.148878066 | 2.623522274  | 0.008702575 | 0.087711463 | ankib1b           | ZDB-GENE-100920-6    | ankib1b           |
| ENSDARG00000055493 | 230.8677816 | 0.258980185  | 0.098721308 | 2.623346367  | 0.00870707  | 0.087712325 | hic1              | ZDB-GENE-040713-2    | hic1              |
| ENSDARG00000062430 | 106.0320338 | -0.427819716 | 0.163092583 | -2.623170893 | 0.008711556 | 0.087712325 | gpd2              | ZDB-GENE-030131-4869 | gpd2              |
| ENSDARG00000058329 | 12.83112715 | 0.918509735  | 0.350172307 | 2.623022197  | 0.008715359 | 0.087712325 | btr21             | ZDB-GENE-081031-80   | btr21             |
| ENSDARG00000067990 | 31399.17544 | -1.636453727 | 0.624138282 | -2.621940961 | 0.008743058 | 0.087948368 | myhz1.1           | ZDB-GENE-000322-5    | myhz1.1           |
| ENSDARG00000104542 | 23.7412033  | 0.505079785  | 0.192862105 | 2.618864841  | 0.008822289 | 0.088678668 | ppt2              | ZDB-GENE-010430-4    | ppt2              |
| ENSDARG00000099137 | 381.3154767 | 0.352198107  | 0.134488852 | 2.618790336  | 0.008824216 | 0.088678668 | BX663503.3        |                      |                   |
| ENSDARG00000053068 | 732.0733712 | -0.502309018 | 0.191882084 | -2.61780051  | 0.008849853 | 0.088891065 | cyp8b1            | ZDB-GENE-040808-53   | cyp8b1            |
| ENSDARG00000027112 | 55.83913579 | 0.378184357  | 0.144475132 | 2.617643278  | 0.008853931 | 0.088891065 | ephb4b            | ZDB-GENE-990415-65   | ephb4b            |
| ENSDARG00000114142 | 5.901695651 | 0.86447951   | 0.330419332 | 2.616310321  | 0.008888573 | 0.089183626 | si:dkeyp-4f2.1    | ZDB-GENE-081103-33   | si:dkeyp-4f2.1    |

|                    |             |              |             |              |             |             |                    |                      |                    |
|--------------------|-------------|--------------|-------------|--------------|-------------|-------------|--------------------|----------------------|--------------------|
| ENSDARG00000056075 | 540.606894  | 0.313499013  | 0.119830321 | 2.616191056  | 0.008891679 | 0.089183626 | rca2.1             | ZDB-GENE-050320-60   | rca2.1             |
| ENSDARG00000099280 | 165.9364684 | -0.354774674 | 0.135620594 | -2.615935122 | 0.008898346 | 0.089207321 | utp20              | ZDB-GENE-080225-38   | utp20              |
| ENSDARG00000063375 | 117.2170949 | 0.32027501   | 0.122459473 | 2.615355115  | 0.008913473 | 0.089315757 | pter               | ZDB-GENE-060825-190  | pter               |
| ENSDARG00000011743 | 49.8586801  | -0.475621511 | 0.181874467 | -2.615108761 | 0.008919905 | 0.089320795 | pigo               | ZDB-GENE-091204-80   | pigo               |
| ENSDARG00000040427 | 66.61956517 | 0.943371028  | 0.360752952 | 2.615005705  | 0.008922597 | 0.089320795 | acot19             | ZDB-GENE-041114-124  | acot19             |
| ENSDARG00000041022 | 48.42064792 | 0.406446088  | 0.155470811 | 2.614291949  | 0.00894126  | 0.089464406 | pdcd4b             | ZDB-GENE-030131-9847 | pdcd4b             |
| ENSDARG00000079766 | 58.23057605 | 0.431831417  | 0.165211771 | 2.613805389  | 0.008954002 | 0.08952105  | tap1               | ZDB-GENE-050517-43   | tap1               |
| ENSDARG00000002401 | 43.61278916 | -0.600540389 | 0.229762345 | -2.613745911 | 0.008955561 | 0.08952105  | gale               | ZDB-GENE-060421-6479 | gale               |
| ENSDARG00000028721 | 156.3501272 | -0.251879415 | 0.096382825 | -2.613322598 | 0.008966662 | 0.089564445 | mapk14b            | ZDB-GENE-021007-1    | mapk14b            |
| ENSDARG00000079530 | 116.7336033 | 0.370155641  | 0.141646698 | 2.613231705  | 0.008969047 | 0.089564445 | si:dkey-17m8.1     | ZDB-GENE-110411-225  | si:dkey-17m8.1     |
| ENSDARG00000056481 | 998.7892414 | 0.263052519  | 0.100672498 | 2.612953142  | 0.008976361 | 0.089564445 | vat1               | ZDB-GENE-030616-178  | vat1               |
| ENSDARG00000100353 | 160.8071323 | 0.456864765  | 0.174848253 | 2.612921536  | 0.008977191 | 0.089564445 | si:ch1073-398f15.1 | ZDB-GENE-141212-388  | si:ch1073-398f15.1 |
| ENSDARG00000097496 | 56.04711334 | 0.342851983  | 0.131258832 | 2.612029805  | 0.009000641 | 0.089734147 | si:dkey-6e2.2      | ZDB-GENE-131121-72   | si:dkey-6e2.2      |
| ENSDARG00000020043 | 54.89687723 | -0.392244565 | 0.150173336 | -2.61194547  | 0.009002861 | 0.089734147 | cnot8              | ZDB-GENE-040426-2845 | cnot8              |
| ENSDARG00000061549 | 19.9508715  | 0.629841584  | 0.241227161 | 2.610989502  | 0.009028067 | 0.089942113 | foxo1b             | ZDB-GENE-080425-3    | foxo1b             |
| ENSDARG00000032430 | 248.7595857 | -0.343474519 | 0.131580658 | -2.610372413 | 0.00904437  | 0.090053691 | ppp2r1bb           | ZDB-GENE-040927-20   | ppp2r1bb           |
| ENSDARG00000070545 | 454.9998866 | -0.382348362 | 0.146480338 | -2.610236753 | 0.009047958 | 0.090053691 | top1l              | ZDB-GENE-060616-217  | top1l              |
| ENSDARG00000013670 | 534.7541897 | -0.650922597 | 0.249390236 | -2.610056461 | 0.009052728 | 0.090057912 | hyou1              | ZDB-GENE-030131-5344 | hyou1              |
| ENSDARG00000078348 | 244.5183445 | 0.263048113  | 0.100806028 | 2.609448253  | 0.009068836 | 0.090168216 | tcf20              | ZDB-GENE-110411-97   | tcf20              |
| ENSDARG00000101043 | 649.4205147 | -0.476390216 | 0.182573299 | -2.609309346 | 0.009072519 | 0.090168216 | ppl                | ZDB-GENE-041008-196  | ppl                |
| ENSDARG00000038635 | 60.07086891 | -0.441096769 | 0.169080249 | -2.608801267 | 0.009085999 | 0.090258906 | magoh              | ZDB-GENE-041216-1    | magoh              |
| ENSDARG00000090063 | 1085.200289 | 0.431729386  | 0.16553607  | 2.608068349  | 0.009105477 | 0.090409055 | fa2h               | ZDB-GENE-031219-4    | fa2h               |
| ENSDARG00000052705 | 30.60759956 | -1.321011684 | 0.506557248 | -2.60782308  | 0.009112004 | 0.090430526 | pkp1b              | ZDB-GENE-030131-417  | pkp1b              |
| ENSDARG00000018809 | 102.9492235 | -0.39629907  | 0.152031163 | -2.606696296 | 0.009142041 | 0.090685192 | abhd3              | ZDB-GENE-040912-90   | abhd3              |
| ENSDARG00000103917 | 212.0675175 | -0.683576369 | 0.26235803  | -2.605509607 | 0.00917377  | 0.090913338 | znf185             | ZDB-GENE-061103-355  | znf185             |
| ENSDARG00000114141 | 19.20808389 | -0.959253817 | 0.368187529 | -2.605340328 | 0.009178304 | 0.090913338 | CABZ01083546.1     |                      |                    |
| ENSDARG00000090185 | 550.2663946 | 0.358502495  | 0.137606352 | 2.605275769  | 0.009180034 | 0.090913338 | si:dkeyp-73b11.8   | ZDB-GENE-131120-176  | si:dkeyp-73b11.8   |
| ENSDARG00000075110 | 74.78144106 | 0.328191198  | 0.125984051 | 2.605021801  | 0.009186841 | 0.090913338 | dab2ipb            | ZDB-GENE-030131-2449 | dab2ipb            |
| ENSDARG00000102129 | 0.961335431 | 2.48715687   | 0.954759001 | 2.60501013   | 0.009187154 | 0.090913338 | crygn1             | ZDB-GENE-050225-1    | crygn1             |
| ENSDARG00000024090 | 45.5153284  | 0.368767178  | 0.141569276 | 2.604853172  | 0.009191364 | 0.090913338 | dnajc4             | ZDB-GENE-030131-3093 | dnajc4             |
| ENSDARG00000043357 | 69.14478105 | -0.425615832 | 0.163460964 | -2.603776588 | 0.009220284 | 0.091155878 | tbl2               | ZDB-GENE-030131-9012 | tbl2               |
| ENSDARG00000070570 | 17.72742402 | -0.54808549  | 0.210559949 | -2.602990233 | 0.009241459 | 0.091286648 | ppp4ca             | ZDB-GENE-030131-4433 | ppp4ca             |
| ENSDARG00000023176 | 338.43088   | -0.774790401 | 0.29765764  | -2.602958222 | 0.009242322 | 0.091286648 | tdo2b              | ZDB-GENE-030131-6014 | tdo2b              |
| ENSDARG00000007867 | 269.0056654 | 0.251571634  | 0.09667128  | 2.602340998  | 0.009258974 | 0.091369672 | dazap2             | ZDB-GENE-030131-3036 | dazap2             |
| ENSDARG00000039424 | 47.11038295 | -0.512524278 | 0.196952689 | -2.60227104  | 0.009260863 | 0.091369672 | snrpb2             | ZDB-GENE-060616-2    | snrpb2             |
| ENSDARG00000078308 | 94.85422416 | 0.322276874  | 0.123849917 | 2.602156551  | 0.009263955 | 0.091369672 | spry2              | ZDB-GENE-030131-7038 | spry2              |
| ENSDARG00000096961 | 64.5514428  | 0.49407574   | 0.189902411 | 2.601734953  | 0.009275351 | 0.091438542 | CLIP4              | ZDB-GENE-131126-9    | si:dkeyp-47f9.4    |
| ENSDARG00000062968 | 270.1995576 | 0.189078741  | 0.072708967 | 2.600487238  | 0.009309148 | 0.091728088 | sbf1               | ZDB-GENE-040718-139  | sbf1               |
| ENSDARG00000071558 | 135.7566588 | 0.531392396  | 0.20436199  | 2.600250644  | 0.009315569 | 0.091745939 | fbli1              | ZDB-GENE-061013-662  | fbli1              |
| ENSDARG00000020953 | 62.13856971 | -0.391214577 | 0.150461688 | -2.600094293 | 0.009319815 | 0.091745939 | dnajb6b            | ZDB-GENE-040426-1122 | dnajb6b            |
| ENSDARG00000053362 | 327.7002714 | 0.416758332  | 0.160306404 | 2.599760965  | 0.009328872 | 0.09179149  | cilp               | ZDB-GENE-050208-76   | cilp               |
| ENSDARG00000055809 | 0.998007212 | 2.667880387  | 1.026472141 | 2.599077247  | 0.009347474 | 0.091930872 | vtg2               | ZDB-GENE-001201-2    | vtg2               |
| ENSDARG00000057805 | 86.45071668 | -0.363986323 | 0.140055678 | -2.598868741 | 0.009353153 | 0.091936168 | mrpl28             | ZDB-GENE-050522-113  | mrpl28             |
| ENSDARG00000011876 | 58.86175404 | 0.338106565  | 0.130104448 | 2.598731779  | 0.009356885 | 0.091936168 | ednraa             | ZDB-GENE-010906-2    | ednraa             |
| ENSDARG00000035332 | 36.21449263 | -0.44520538  | 0.171338753 | -2.598392783 | 0.009366129 | 0.091968671 | cfap298            | ZDB-GENE-040930-8    | cfap298            |
| ENSDARG00000108326 | 25.17792067 | 0.66488387   | 0.255893357 | 2.598284995  | 0.00936907  | 0.091968671 | LT631684.1         |                      |                    |

|                     |             |               |             |              |             |             |                    |                      |                    |
|---------------------|-------------|---------------|-------------|--------------|-------------|-------------|--------------------|----------------------|--------------------|
| ENSDARG00000076324  | 528.7375216 | 0.270504628   | 0.104131143 | 2.597730338  | 0.009384216 | 0.092009731 | lmtk2              | ZDB-GENE-100812-11   | lmtk2              |
| ENSDARG00000077029  | 33.670035   | -0.662459475  | 0.255033753 | -2.597536475 | 0.009389515 | 0.092009731 | bub1               | ZDB-GENE-081104-75   | bub1               |
| ENSDARG00000089326  | 4.454357894 | 1.081824492   | 0.416486684 | 2.597500791  | 0.00939049  | 0.092009731 | arhgap20           | ZDB-GENE-071015-1    | arhgap20           |
| ENSDARG00000020866  | 4886.268136 | -0.637529536  | 0.2454414   | -2.597481661 | 0.009391013 | 0.092009731 | apoa4b.2           | ZDB-GENE-030131-3143 | apoa4b.2           |
| ENSDARG00000015543  | 1.301673119 | -4.819771443  | 1.856064312 | -2.596769633 | 0.009410501 | 0.092157094 | s100a1             | ZDB-GENE-040916-1    | s100a1             |
| ENSDARG00000036060  | 28.20082255 | -0.579665808  | 0.22332606  | -2.595603077 | 0.009442508 | 0.09242685  | exosc6             | ZDB-GENE-050522-362  | exosc6             |
| ENSDARG00000002403  | 54.81993614 | -0.5211105299 | 0.200794712 | -2.59521426  | 0.009453197 | 0.092487793 | nusap1             | ZDB-GENE-030827-5    | nusap1             |
| ENSDARG000000114258 | 87.28625094 | -0.385031188  | 0.148371505 | -2.595048076 | 0.009457769 | 0.092488856 | si:dkey-30c15.13   | ZDB-GENE-060503-73   | si:dkey-30c15.13   |
| ENSDARG00000018124  | 192.0073165 | -0.401848285  | 0.154863437 | -2.594855786 | 0.009463062 | 0.092496963 | psmd3              | ZDB-GENE-040426-1444 | psmd3              |
| ENSDARG000000104726 | 52.21159151 | -0.395686344  | 0.152538294 | -2.594013178 | 0.009486285 | 0.092680245 | si:ch211-162e15.3  | ZDB-GENE-131121-530  | si:ch211-162e15.3  |
| ENSDARG000000088967 | 68.72253742 | -0.476160375  | 0.183689834 | -2.592197762 | 0.009536493 | 0.09312687  | wnk4b              | ZDB-GENE-131120-119  | wnk4b              |
| ENSDARG00000021372  | 607.5949444 | -0.384790785  | 0.148466476 | -2.591768837 | 0.009548391 | 0.093199129 | tob1b              | ZDB-GENE-040426-2151 | tob1b              |
| ENSDARG00000029204  | 18.39043205 | 0.721190182   | 0.278330542 | 2.591128434  | 0.009566178 | 0.093328788 | tyrp1a             | ZDB-GENE-070718-2    | tyrp1a             |
| ENSDARG00000077260  | 3.828505798 | 1.167989451   | 0.450848252 | 2.590648727  | 0.009579522 | 0.093384115 | si:dkey-28d5.13    | ZDB-GENE-060503-636  | si:dkey-28d5.13    |
| ENSDARG00000039913  | 87.69132001 | -0.386362458  | 0.149142723 | -2.590555216 | 0.009582125 | 0.093384115 | tmem147            | ZDB-GENE-040718-187  | tmem147            |
| ENSDARG00000002298  | 10.04612706 | -0.790275023  | 0.305073816 | -2.590438712 | 0.009585369 | 0.093384115 | ankrd22            | ZDB-GENE-040426-1120 | ankrd22            |
| ENSDARG00000057921  | 10.25952518 | 0.793880161   | 0.306541477 | 2.589796878  | 0.009603258 | 0.09351443  | ccdc136b           | ZDB-GENE-081104-244  | ccdc136b           |
| ENSDARG00000041407  | 22.78619565 | -0.46435441   | 0.179318678 | -2.589548479 | 0.009610189 | 0.093537969 | rmdn3              | ZDB-GENE-041014-256  | rmdn3              |
| ENSDARG000000101281 | 17.81278749 | 0.634552991   | 0.245093173 | 2.589027605  | 0.009624738 | 0.0936351   | corin              | ZDB-GENE-060224-3    | corin              |
| ENSDARG00000021443  | 1116.025459 | 0.471986152   | 0.182323185 | 2.588733591  | 0.009632959 | 0.0936351   | zfp361b            | ZDB-GENE-030131-2391 | zfp361b            |
| ENSDARG00000060380  | 60.2206013  | -0.353733112  | 0.136644749 | -2.588706228 | 0.009633724 | 0.0936351   | coq6               | ZDB-GENE-060825-297  | coq6               |
| ENSDARG00000027418  | 38.75415689 | -0.412730626  | 0.159473084 | -2.588089575 | 0.009650988 | 0.093758919 | trappc4            | ZDB-GENE-040426-1734 | trappc4            |
| ENSDARG00000031757  | 98.54654422 | 0.420609669   | 0.162537381 | 2.587771905  | 0.009659892 | 0.093801447 | tmc4               | ZDB-GENE-030131-7489 | tmc4               |
| ENSDARG00000051939  | 123.8191895 | -0.578124244  | 0.223442583 | -2.587350342 | 0.00967172  | 0.093846778 | pcxb               | ZDB-GENE-000831-1    | pcxb               |
| ENSDARG00000096721  | 4.650601279 | -1.071810386  | 0.414269366 | -2.587230614 | 0.009675081 | 0.093846778 | si:rp71-1c10.11    | ZDB-GENE-130603-61   | si:rp71-1c10.11    |
| ENSDARG00000089107  | 28.30029774 | 0.605772181   | 0.234156741 | 2.587037121  | 0.009680516 | 0.093846778 | mlxipl             | ZDB-GENE-100922-66   | mlxipl             |
| ENSDARG00000031888  | 20.00975431 | -0.53496034   | 0.206802618 | -2.586816091 | 0.009686728 | 0.093846778 | mapk8a             | ZDB-GENE-080218-17   | mapk8a             |
| ENSDARG00000098644  | 80.53146492 | 0.450245212   | 0.174054958 | 2.586799124  | 0.009687205 | 0.093846778 | si:ch211-126j24.1  | ZDB-GENE-050208-133  | si:ch211-126j24.1  |
| ENSDARG00000086603  | 5.123597208 | -1.017534133  | 0.393591018 | -2.585257507 | 0.009730629 | 0.094199375 | zgc:136963         | ZDB-GENE-060312-8    | zgc:136963         |
| ENSDARG00000055723  | 11.43412603 | -1.233633059  | 0.477196725 | -2.585166653 | 0.009733194 | 0.094199375 | hsp70l             | ZDB-GENE-050321-1    | hsp70l             |
| ENSDARG00000060184  | 176.0550473 | 0.251127681   | 0.09714716  | 2.585023405  | 0.009737239 | 0.094199375 | pkn1a              | ZDB-GENE-061207-17   | pkn1a              |
| ENSDARG00000019332  | 242.184255  | -0.330706986  | 0.127978327 | -2.584085868 | 0.009763748 | 0.094411755 | ndufb4             | ZDB-GENE-040426-1973 | ndufb4             |
| ENSDARG00000070607  | 109.3494778 | -0.328229407  | 0.127058971 | -2.583283991 | 0.009786473 | 0.094587356 | mrpl36             | ZDB-GENE-060503-821  | mrpl36             |
| ENSDARG00000019579  | 82.53834122 | 0.372260628   | 0.144118139 | 2.583024124  | 0.009793847 | 0.094614502 | ldb2a              | ZDB-GENE-990415-136  | ldb2a              |
| ENSDARG00000076776  | 7.986003495 | -1.095011705  | 0.424007908 | -2.582526613 | 0.00980798  | 0.09465681  | gucy2g             | ZDB-GENE-130531-70   | gucy2g             |
| ENSDARG000000100199 | 20.7412474  | 1.185941864   | 0.459226148 | 2.582478959  | 0.009809334 | 0.09465681  | si:ch1073-185p12.2 | ZDB-GENE-110411-196  | si:ch1073-185p12.2 |
| ENSDARG00000039034  | 521.3621646 | 0.273148366   | 0.105773572 | 2.582387638  | 0.009811931 | 0.09465681  | marcks1a           | ZDB-GENE-040426-2146 | marcks1a           |
| ENSDARG00000018485  | 73.00726489 | 0.340007904   | 0.131682421 | 2.582029574  | 0.009822117 | 0.094710983 | cyp2v1             | ZDB-GENE-040912-139  | cyp2v1             |
| ENSDARG00000073737  | 50.9317639  | 0.40187978    | 0.155667134 | 2.581661071  | 0.00983261  | 0.094768064 | suds3              | ZDB-GENE-040801-236  | suds3              |
| ENSDARG00000020008  | 709.1712826 | -0.35961438   | 0.139338729 | -2.580864511 | 0.009855325 | 0.09494284  | vcp                | ZDB-GENE-030131-5408 | vcp                |
| ENSDARG00000019250  | 2.044003019 | -1.794503196  | 0.695564097 | -2.579924989 | 0.009882178 | 0.09515729  | fancf              | ZDB-GENE-060306-3    | fancf              |
| ENSDARG00000086840  | 4.228754381 | -1.235791292  | 0.479046976 | -2.579687077 | 0.009888988 | 0.095178638 | si:ch211-266k8.4   | ZDB-GENE-131121-469  | si:ch211-266k8.4   |
| ENSDARG00000040027  | 53.30393154 | 0.503198656   | 0.195105105 | 2.579115791  | 0.009905358 | 0.095279807 | osbpl10b           | ZDB-GENE-081002-4    | osbpl10b           |
| ENSDARG00000095532  | 10.45185637 | 1.257723575   | 0.48767889  | 2.578999421  | 0.009908695 | 0.095279807 | si:dkey-58f10.13   | ZDB-GENE-060526-315  | si:dkey-58f10.13   |
| ENSDARG00000043468  | 2.988041798 | 1.435769298   | 0.557074834 | 2.577336492  | 0.009956497 | 0.095695055 | sytl3              | ZDB-GENE-040724-150  | sytl3              |
| ENSDARG00000094346  | 6.337669371 | 2.425026343   | 0.941369738 | 2.576061504  | 0.009993287 | 0.096004122 | si:ch211-114l13.3  | ZDB-GENE-070424-112  | si:ch211-114l13.3  |

|                    |             |              |             |              |             |             |                  |                      |                   |
|--------------------|-------------|--------------|-------------|--------------|-------------|-------------|------------------|----------------------|-------------------|
| ENSDARG00000056729 | 1.210067166 | 2.589368085  | 1.005291912 | 2.57573751   | 0.010002655 | 0.096012205 | her4.2           | ZDB-GENE-060815-1    | her4.2            |
| ENSDARG00000053853 | 2455.738839 | -0.640740493 | 0.248771937 | -2.575614033 | 0.010006227 | 0.096012205 | slc13a2          | ZDB-GENE-040426-2389 | slc13a2           |
| ENSDARG00000075525 | 13.52954925 | -0.750083366 | 0.291244311 | -2.575443832 | 0.010011153 | 0.096012205 | cln8             | ZDB-GENE-060906-3    | cln8              |
| ENSDARG00000055339 | 72.79876821 | -0.428114462 | 0.166243703 | -2.57522212  | 0.010017573 | 0.096012205 | si:ch73-1a9.4    | ZDB-GENE-050506-64   | si:ch73-1a9.4     |
| ENSDARG00000099554 | 93.01385298 | -0.293496004 | 0.113974566 | -2.57510088  | 0.010021085 | 0.096012205 | sec16b           | ZDB-GENE-050208-274  | sec16b            |
| ENSDARG00000037244 | 15.66666664 | 0.539990029  | 0.20969902  | 2.575071786  | 0.010021928 | 0.096012205 | gpr137           | ZDB-GENE-040718-443  | gpr137            |
| ENSDARG00000101413 | 242.7950272 | 0.271357462  | 0.105402904 | 2.574478051  | 0.010039146 | 0.096132706 | dusp7            | ZDB-GENE-030131-5457 | dusp7             |
| ENSDARG00000006220 | 1377.352279 | 0.404381446  | 0.157088653 | 2.574224418  | 0.010046509 | 0.096158776 | ugt1a7           | ZDB-GENE-071004-5    | ugt1a2            |
| ENSDARG00000006220 | 1377.352279 | 0.404381446  | 0.157088653 | 2.574224418  | 0.010046509 | 0.096158776 | ugt1a7           | ZDB-GENE-071004-4    | ugt1a1            |
| ENSDARG00000006220 | 1377.352279 | 0.404381446  | 0.157088653 | 2.574224418  | 0.010046509 | 0.096158776 | ugt1a7           | ZDB-GENE-080227-5    | ugt1a6            |
| ENSDARG00000006220 | 1377.352279 | 0.404381446  | 0.157088653 | 2.574224418  | 0.010046509 | 0.096158776 | ugt1a7           | ZDB-GENE-080227-6    | ugt1a7            |
| ENSDARG00000098026 | 5.626673416 | 0.95684178   | 0.371853104 | 2.573171425  | 0.010077128 | 0.096407317 | si:dkey-238d18.8 | ZDB-GENE-131119-29   | si:dkey-238d18.8  |
| ENSDARG00000076997 | 0.907408058 | -2.456886348 | 0.955078057 | -2.572445602 | 0.010098282 | 0.096565117 | stxbp4           | ZDB-GENE-110420-5    | stxbp4            |
| ENSDARG00000003984 | 116.3102679 | -0.392797563 | 0.152725236 | -2.571923106 | 0.010113535 | 0.096666363 | LTN1             | ZDB-GENE-091204-127  | si:dkey-175g6.5   |
| ENSDARG00000007040 | 340.0573582 | 0.557970391  | 0.216986364 | 2.571453713  | 0.010127255 | 0.096752874 | tmigd1           | ZDB-GENE-080303-6    | tmigd1            |
| ENSDARG00000073688 | 193.0062561 | 0.285279467  | 0.110982787 | 2.570483909  | 0.010155654 | 0.096949733 | nav2a            | ZDB-GENE-120502-3    | nav2a             |
| ENSDARG00000068562 | 188.0145804 | 0.361548069  | 0.140656616 | 2.570430586  | 0.010157218 | 0.096949733 | rbm33a           | ZDB-GENE-140106-90   | rbm33a            |
| ENSDARG00000043475 | 51.79636867 | -0.516061777 | 0.200787665 | -2.570186652 | 0.010164373 | 0.096973363 | TAGAP            | ZDB-GENE-121214-340  | si:ch211-122h15.4 |
| ENSDARG00000043475 | 51.79636867 | -0.516061777 | 0.200787665 | -2.570186652 | 0.010164373 | 0.096973363 | TAGAP            | ZDB-GENE-040724-50   | tagapb            |
| ENSDARG00000059125 | 148.2879035 | -0.296651009 | 0.115430113 | -2.569962034 | 0.010170966 | 0.096991606 | prkacbb          | ZDB-GENE-050904-4    | prkacbb           |
| ENSDARG00000102965 | 34.21296313 | 0.437101465  | 0.1701182   | 2.569398602  | 0.01018752  | 0.097070602 | CABZ01087948.1   |                      |                   |
| ENSDARG00000040334 | 375.2168648 | -0.355965464 | 0.138547895 | -2.56925928  | 0.010191617 | 0.097070602 | mat2aa           | ZDB-GENE-030131-2049 | mat2aa            |
| ENSDARG00000116221 | 9.946568143 | 0.818290653  | 0.318499934 | 2.56920196   | 0.010193303 | 0.097070602 | LO018205.2       |                      |                   |
| ENSDARG00000088130 | 27.27778942 | -0.661748148 | 0.257631757 | -2.568581433 | 0.010211572 | 0.097199902 | si:dkey-30c15.10 | ZDB-GENE-060503-826  | si:dkey-30c15.10  |
| ENSDARG00000102299 | 26.05768673 | 0.777160988  | 0.302605244 | 2.568233704  | 0.010221822 | 0.097242631 | cxcl8b.1         | ZDB-GENE-101026-3    | cxcl8b.1          |
| ENSDARG00000102762 | 16.87851306 | 0.640006078  | 0.249227528 | 2.567959022  | 0.010229925 | 0.097242631 | pik3r5           | ZDB-GENE-030131-2308 | pik3r5            |
| ENSDARG00000045843 | 98.57223729 | -0.466430437 | 0.181635201 | -2.567951771 | 0.010230139 | 0.097242631 | apex1            | ZDB-GENE-040426-2761 | apex1             |
| ENSDARG00000041554 | 109.9917485 | 0.513988734  | 0.200192865 | 2.567467792  | 0.010244431 | 0.097273802 | unc93a           | ZDB-GENE-041014-304  | unc93a            |
| ENSDARG00000078042 | 107.375267  | 0.549239666  | 0.213933685 | 2.567336069  | 0.010248323 | 0.097273802 | il10rb           | ZDB-GENE-050909-1    | il10rb            |
| ENSDARG00000102908 | 141.6037034 | 0.323827499  | 0.126136564 | 2.567276992  | 0.01025007  | 0.097273802 | il16             | ZDB-GENE-130103-3    | il16              |
| ENSDARG00000009779 | 249.8146155 | 0.426629847  | 0.166184558 | 2.567205112  | 0.010252195 | 0.097273802 | mcl1a            | ZDB-GENE-000511-7    | mcl1a             |
| ENSDARG00000052465 | 25.5211809  | 0.62615453   | 0.24394999  | 2.566733172  | 0.010266158 | 0.097317934 | dusp10           | ZDB-GENE-041014-271  | dusp10            |
| ENSDARG00000041493 | 91.08043465 | -0.456825073 | 0.177981871 | -2.566694411 | 0.010267305 | 0.097317934 | ipo4             | ZDB-GENE-041014-307  | ipo4              |
| ENSDARG00000090833 | 14.73746722 | 0.694126138  | 0.270448749 | 2.566571819  | 0.010270935 | 0.097317934 | igfbp6b          | ZDB-GENE-090521-2    | igfbp6b           |
| ENSDARG00000076848 | 107.3876057 | 0.747491149  | 0.291388521 | 2.565273148  | 0.010309461 | 0.097630655 | zgc:112492       | ZDB-GENE-050417-143  | zgc:112492        |
| ENSDARG00000015790 | 24.92392122 | -0.519062091 | 0.202352197 | -2.565141864 | 0.010313363 | 0.097630655 | atp1b3a          | ZDB-GENE-990415-167  | atp1b3a           |
| ENSDARG00000004724 | 160.8157923 | 0.380755856  | 0.148444687 | 2.564967896  | 0.010318535 | 0.097635016 | tcea3            | ZDB-GENE-040426-1860 | tcea3             |
| ENSDARG00000069726 | 8.682497396 | 0.926082009  | 0.361396912 | 2.5625067    | 0.010391958 | 0.098284874 | glis3            | ZDB-GENE-070112-2232 | glis3             |
| ENSDARG00000038669 | 46.12595701 | 0.521146411  | 0.203398729 | 2.562191082  | 0.010401407 | 0.098312176 | gbp2             | ZDB-GENE-070912-618  | gbp2              |
| ENSDARG00000060008 | 23.17301746 | 0.852930666  | 0.332903815 | 2.562093392  | 0.010404334 | 0.098312176 | hhipl2           | ZDB-GENE-131120-145  | hhipl2            |
| ENSDARG00000109646 | 14.48735618 | -0.668723213 | 0.261045808 | -2.561708302 | 0.010415876 | 0.098376382 | si:ch211-153a8.4 | ZDB-GENE-030131-6830 | si:ch211-153a8.4  |
| ENSDARG00000092045 | 13.14755412 | 0.683198878  | 0.266824366 | 2.560481597  | 0.01045272  | 0.098665376 | si:dkey-225k4.1  | ZDB-GENE-091204-219  | si:dkey-225k4.1   |
| ENSDARG00000102977 | 318.0653601 | 0.511956882  | 0.199957874 | 2.56032369   | 0.010457471 | 0.098665376 | cant1b           | ZDB-GENE-040801-114  | cant1b            |
| ENSDARG00000105104 | 8.161363741 | -1.077180564 | 0.420738408 | -2.560214478 | 0.010460758 | 0.098665376 | si:dkey-223p19.1 | ZDB-GENE-120215-140  | si:dkey-223p19.1  |
| ENSDARG00000089933 | 80.57214661 | 0.419237649  | 0.16377427  | 2.559850509  | 0.01047172  | 0.098723829 | rasal3           | ZDB-GENE-101130-3    | rasal3            |
| ENSDARG00000104085 | 710.4018045 | -0.323933653 | 0.126585778 | -2.559005119 | 0.01049722  | 0.098881885 | abcd3a           | ZDB-GENE-040426-2868 | abcd3a            |



|                    |             |              |             |              |             |             |                 |                      |                 |
|--------------------|-------------|--------------|-------------|--------------|-------------|-------------|-----------------|----------------------|-----------------|
| ENSDARG00000099194 | 71.45527293 | -0.557990468 | 0.218052049 | -2.55897833  | 0.010498029 | 0.098881885 | CABZ01058261.1  |                      |                 |
| ENSDARG00000078772 | 141.7883888 | 0.259702393  | 0.101507836 | 2.558446744  | 0.010514092 | 0.098988197 | nbr1b           | ZDB-GENE-170215-1    | nbr1b           |
| ENSDARG00000101104 | 10.01481141 | 0.696762517  | 0.272367668 | 2.558168968  | 0.010522495 | 0.099022317 | FP102192.1      |                      |                 |
| ENSDARG00000089369 | 115.0398286 | -0.762761778 | 0.298187368 | -2.557994941 | 0.010527762 | 0.099026914 | fdxr            | ZDB-GENE-130613-2    | fdxr            |
| ENSDARG00000030022 | 87.84248346 | -0.381067425 | 0.149019517 | -2.557164544 | 0.010552929 | 0.099218597 | nup188          | ZDB-GENE-030131-7184 | nup188          |
| ENSDARG00000100725 | 53.47864013 | 0.372063733  | 0.14551313  | 2.556908329  | 0.010560704 | 0.09923404  | ephb4a          | ZDB-GENE-990415-62   | ephb4a          |
| ENSDARG00000058218 | 190.7421744 | 0.477435951  | 0.186732207 | 2.556794887  | 0.010564149 | 0.09923404  | fam151a         | ZDB-GENE-070705-105  | fam151a         |
| ENSDARG00000079327 | 124.560418  | 0.514404774  | 0.20127192  | 2.555770189  | 0.010595307 | 0.099481626 | hmcn2           | ZDB-GENE-030131-9765 | hmcn2           |
| ENSDARG00000093704 | 4.751079804 | -8.272949544 | 3.237535043 | -2.555323551 | 0.010608913 | 0.099564267 | si:dkeyp-46h3.8 | ZDB-GENE-060503-183  | si:dkeyp-46h3.8 |
| ENSDARG00000056151 | 136.8035178 | 0.412563291  | 0.161521129 | 2.554237298  | 0.01064207  | 0.09983023  | tyrp1b          | ZDB-GENE-040718-249  | tyrp1b          |
| ENSDARG00000022399 | 65.4348968  | -0.43588689  | 0.170684558 | -2.553757028 | 0.010656759 | 0.099922789 | ntmt1           | ZDB-GENE-040426-2055 | ntmt1           |
| ENSDARG00000068288 | 127.7181779 | -0.73619551  | 0.288306625 | -2.553515758 | 0.010664145 | 0.09994682  | lamc2           | ZDB-GENE-110222-3    | lamc2           |
