# Supplementary material
Source: publisher figshare collection journal article supplement (https://gsajournals.figshare.com/articles/dataset/_/13236983)
Supplement: Supplementary file 11 [file 1]

Supplemental Table S3: 21dpf trunk RNA-seq data, genes differentially expressed between *nr5a1a* mutants and wildtypes.

| EnsemblID           | baseMean    | log2FoldChange | fold up in 1a vs wt | old down in 1a vs w | lfscE       | stat        | pvalue      | padj        | EnsemblGeneName    | ZFIN_ID              | ZFIN_Name          |
|---------------------|-------------|----------------|---------------------|---------------------|-------------|-------------|-------------|-------------|--------------------|----------------------|--------------------|
| ENSXDARG00000105499 | 8.933914054 | 16.52802421    | 94499.83609         | 1.0582E-05          | 2.561066572 | 6.453570707 | 1.09245E-10 | 2.61025E-08 | zgc:175135         | ZDB-GENE-080214-1    | zgc:175135         |
| ENSXDARG00000087392 | 15.91016015 | 16.44166162    | 89008.87816         | 1.12348E-05         | 2.294750549 | 7.164901488 | 7.78425E-13 | 2.75413E-10 | si:ch73-160p18.3   | ZDB-GENE-141212-268  | si:ch73-160p18.3   |
| ENSXDARG00000093704 | 4.751079804 | 16.29906075    | 80631.76863         | 1.24021E-05         | 3.214095197 | 5.071119475 | 3.95482E-07 | 4.04227E-05 | si:dkeyp-46h3.8    | ZDB-GENE-060503-183  | si:dkeyp-46h3.8    |
| ENSXDARG00000078638 | 15.44667221 | 16.29439035    | 80371.16374         | 1.24423E-05         | 4.927610584 | 3.306752852 | 0.000943841 | 0.026797518 | zgc:171750         | ZDB-GENE-071004-30   | zgc:171750         |
| ENSXDARG00000093255 | 17.430777   | 15.68307888    | 52611.07393         | 1.90074E-05         | 3.699174639 | 4.239615701 | 2.23903E-05 | 0.00133841  | si:dkeyp-229d11.3  | ZDB-GENE-091117-40   | si:dkeyp-229d11.3  |
| ENSXDARG00000092885 | 21.33582157 | 15.57596417    | 48846.3849          | 2.04723E-05         | 4.267200803 | 3.650159646 | 0.000262077 | 0.009982815 | zgc:171977         | ZDB-GENE-070822-24   | zgc:171977         |
| ENSXDARG00000055751 | 32.85865787 | 4.534153918    | 23.16948253         | 0.043160222         | 0.380829554 | 11.90599277 | 1.10145E-32 | 6.7548E-29  | fosb               | ZDB-GENE-041114-181  | fosb               |
| ENSXDARG00000007739 | 12.86704182 | 3.041019961    | 8.230727542         | 0.121495942         | 0.926673414 | 3.281652321 | 0.001032008 | 0.028594695 | atp1a1a.2          | ZDB-GENE-001212-2    | atp1a1a.2          |
| ENSXDARG00000069381 | 26.06185693 | 3.011383029    | 8.063370586         | 0.124017616         | 0.419088852 | 7.185547926 | 6.69382E-13 | 2.41476E-10 | si:ch211-125e6.5   | ZDB-GENE-070912-39   | si:ch211-125e6.5   |
| ENSXDARG00000100185 | 5.440194487 | 2.81104427     | 7.017923737         | 0.142492287         | 0.573882252 | 4.898294482 | 9.66721E-07 | 8.59214E-05 | elovl7b            | ZDB-GENE-030131-5485 | elovl7b            |
| ENSXDARG00000068006 | 27.10367114 | 2.801496416    | 6.971631987         | 0.143438438         | 0.57722283  | 4.85340543  | 1.21359E-06 | 0.000104335 | gck                | ZDB-GENE-060825-204  | gck                |
| ENSXDARG00000079922 | 44.59147374 | 2.482769164    | 5.589693445         | 0.178900687         | 0.27403413  | 10.03530683 | 1.06627E-23 | 3.26955E-20 | klf4               | ZDB-GENE-111014-1    | klf4               |
| ENSXDARG00000020133 | 13.03596081 | 2.435588785    | 5.409850723         | 0.184847984         | 0.354809453 | 6.864498023 | 6.67255E-12 | 1.88864E-09 | jdp2b              | ZDB-GENE-040718-197  | jdp2b              |
| ENSXDARG00000071083 | 3.650048449 | 2.384373546    | 5.221171492         | 0.191527898         | 0.729537912 | 3.268333979 | 0.001081826 | 0.029618213 | si:dkeyp-34c12.1   | ZDB-GENE-030131-5347 | si:dkeyp-34c12.1   |
| ENSXDARG00000031664 | 10.58565664 | 2.381721248    | 5.211581539         | 0.191880333         | 0.399603989 | 5.96020388  | 2.51923E-09 | 4.87883E-07 | sox21a             | ZDB-GENE-990715-6    | sox21a             |
| ENSXDARG0000002509  | 13.12731894 | 2.31807323     | 4.986657889         | 0.200535112         | 0.357511847 | 6.48390606  | 8.93779E-11 | 2.1925E-08  | zgc:153911         | ZDB-GENE-061013-174  | zgc:153911         |
| ENSXDARG00000010770 | 6.690305925 | 2.059764275    | 4.169181776         | 0.239855217         | 0.400570555 | 5.142076099 | 2.71719E-07 | 2.92344E-05 | sox19a             | ZDB-GENE-980526-102  | sox19a             |
| ENSXDARG00000076221 | 79.64234857 | 2.018141593    | 4.050616757         | 0.246875985         | 0.465443462 | 4.335954327 | 1.45129E-05 | 0.000927113 | fthl28             | ZDB-GENE-030131-7540 | fthl28             |
| ENSXDARG00000076839 | 3.928551988 | 1.978322427    | 3.940346299         | 0.253784801         | 0.557882674 | 3.546126305 | 0.000390939 | 0.013805166 | ftr86              | ZDB-GENE-060929-108  | ftr86              |
| ENSXDARG00000079304 | 11.27070965 | 1.864234186    | 3.64076234          | 0.274668965         | 0.232190921 | 5.768213349 | 8.01163E-09 | 1.35295E-06 | si:dkeyp-221j11.3  | ZDB-GENE-090313-247  | si:dkeyp-221j11.3  |
| ENSXDARG00000052900 | 8.037847019 | 1.858635899    | 3.626645923         | 0.275736871         | 0.641945675 | 2.895316491 | 0.003787764 | 0.073197506 | zgc:153642         | ZDB-GENE-061013-527  | zgc:153642         |
| ENSXDARG00000030896 | 11.21473158 | 1.85722111     | 3.623091172         | 0.276007407         | 0.310723442 | 5.977087211 | 2.27163E-09 | 4.4461E-07  | foxq1a             | ZDB-GENE-070424-74   | foxq1a             |
| ENSXDARG00000079393 | 60.73461521 | 1.825699776    | 3.544789052         | 0.282104234         | 0.498662402 | 3.661193961 | 0.000251043 | 0.009744055 | tmprss15           | ZDB-GENE-091204-83   | tmprss15           |
| ENSXDARG00000056210 | 5.159211051 | 1.730392734    | 3.318181344         | 0.301369906         | 0.444475556 | 3.893111113 | 0.9968E-05  | 0.004668695 | si:ch211-199o1.2   | ZDB-GENE-060503-867  | si:ch211-199o1.2   |
| ENSXDARG00000055395 | 30.12858386 | 1.692126416    | 3.231326243         | 0.309470454         | 0.223848488 | 7.559248822 | 4.05404E-14 | 2.07184E-11 | foxq1b             | ZDB-GENE-040426-2090 | foxq1b             |
| ENSXDARG00000031683 | 29.4249761  | 1.691912898    | 3.230848045         | 0.309516259         | 0.292141033 | 5.791425057 | 6.97917E-09 | 1.18891E-06 | fosab              | ZDB-GENE-031222-4    | fosab              |
| ENSXDARG00000010276 | 18.46761454 | 1.678255617    | 3.200407512         | 0.312460209         | 0.283306238 | 5.92382161  | 3.14545E-09 | 5.84545E-07 | ptgs2b             | ZDB-GENE-041014-323  | ptgs2b             |
| ENSXDARG00000070013 | 3.412912438 | 1.596057715    | 3.023160795         | 0.330799627         | 0.53284654  | 2.995342177 | 0.002741371 | 0.015817272 | dmrt2b             | ZDB-GENE-080813-1    | dmrt2b             |
| ENSXDARG00000091669 | 28.49608733 | 1.595318755    | 3.021612706         | 0.330949098         | 0.253876141 | 6.283846715 | 3.30296E-10 | 7.59599E-08 | bicdl2l            | ZDB-GENE-091204-161  | bicdl2l            |
| ENSXDARG00000092404 | 248.1976766 | 1.579568304    | 2.988804027         | 0.33458199          | 0.310342703 | 5.089754926 | 3.58527E-07 | 3.72665E-05 | si:dkeyp-79p17.3   | ZDB-GENE-081105-132  | si:dkeyp-79p17.3   |
| ENSXDARG00000069467 | 7.751838256 | 1.539891698    | 2.907726747         | 0.343911271         | 0.308882087 | 4.985370669 | 6.18431E-07 | 5.83677E-05 | igsf9bb            | ZDB-GENE-091112-15   | igsf9bb            |
| ENSXDARG00000042815 | 13.17804033 | 1.507213539    | 2.84260428          | 0.35179002          | 0.28461277  | 5.295663776 | 1.18585E-07 | 1.42596E-05 | alkal2b            | ZDB-GENE-111115-2    | alkal2b            |
| ENSXDARG00000015355 | 31.63307981 | 1.501066145    | 2.830518092         | 0.352922213         | 0.346097078 | 4.337124582 | 1.44359E-05 | 0.000925405 | fosl1a             | ZDB-GENE-061207-7    | fosl1a             |
| ENSXDARG00000088505 | 3.591373978 | 1.500502363    | 2.829412187         | 0.353430301         | 0.510126961 | 2.941429248 | 0.003267015 | 0.06620527  | fam217b            | ZDB-GENE-090313-236  | fam217b            |
| ENSXDARG00000116445 | 7.453189215 | 1.499012714    | 2.826492196         | 0.353795422         | 0.363376007 | 4.125238558 | 3.70351E-05 | 0.002015228 | CABZ01046954.1     |                      |                    |
| ENSXDARG00000055854 | 29.24643184 | 1.482902063    | 2.795104192         | 0.357768416         | 0.251700117 | 5.891543011 | 3.82606E-09 | 6.76845E-07 | nr4a3              | ZDB-GENE-070824-4    | nr4a3              |
| ENSXDARG00000044685 | 191.0641097 | 1.468029993    | 2.766438771         | 0.361475559         | 0.321585016 | 4.564982566 | 4.99536E-06 | 0.000372083 | nr0b2a             | ZDB-GENE-080403-1    | nr0b2a             |
| ENSXDARG00000115257 | 18.9305605  | 1.438395912    | 2.710193599         | 0.368977331         | 0.373443073 | 3.851713997 | 0.000117294 | 0.005368095 | si:ch73-338o16.4   | ZDB-GENE-131119-14   | si:ch73-338o16.4   |
| ENSXDARG00000097700 | 4.512459811 | 1.421172692    | 2.678031057         | 0.373408664         | 0.45097833  | 3.151310378 | 0.001625397 | 0.040405856 | si:dkeyp-23k10.2   | ZDB-GENE-131122-52   | si:dkeyp-23k10.2   |
| ENSXDARG00000098377 | 19.36649603 | 1.41888263     | 2.673783457         | 0.374001865         | 0.251711007 | 5.636951072 | 1.73087E-08 | 2.63178E-06 | tnfrsf11b          | ZDB-GENE-081104-76   | tnfrsf11b          |
| ENSXDARG00000103642 | 2103.626207 | 1.384123621    | 2.610133542         | 0.38312216          | 0.395966359 | 3.49555862  | 0.00473071  | 0.016237969 | pglyrp6            | ZDB-GENE-071227-2    | pglyrp6            |
| ENSXDARG00000097231 | 21.56675638 | 1.367065736    | 2.57945403          | 0.387678938         | 0.278216351 | 4.913678617 | 8.93832E-07 | 7.98288E-05 | ugt1b2             | ZDB-GENE-080227-11   | ugt1b2             |
| ENSXDARG00000094265 | 21.24000331 | 1.363860824    | 2.573730197         | 0.388541115         | 0.277285016 | 4.918624322 | 8.71546E-07 | 7.8218E-05  | si:dkeyp-183n20.15 | ZDB-GENE-041001-160  | si:dkeyp-183n20.15 |
| ENSXDARG00000078878 | 14.27373158 | 1.359835966    | 2.566559961         | 0.389626588         | 0.431563496 | 3.150952241 | 0.001627391 | 0.040405856 | si:ch73-244f7.3    | ZDB-GENE-121214-178  | si:ch73-244f7.3    |
| ENSXDARG00000040427 | 66.61956517 | 1.304317277    | 2.469668283         | 0.404912679         | 0.354943094 | 3.67472224  | 0.00238108  | 0.009360506 | acot19             | ZDB-GENE-041114-124  | acot19             |
| ENSXDARG00000037941 | 6.545309914 | 1.285940811    | 2.438410146         | 0.41010328          | 0.385156356 | 3.338750067 | 0.000841562 | 0.024693885 | syt5a              | ZDB-GENE-040718-110  | syt5a              |
| ENSXDARG00000100052 | 5.236576408 | 1.284766846    | 2.436426744         | 0.41043713          | 0.410746252 | 3.127884527 | 0.001760693 | 0.042735141 | cckb               | ZDB-GENE-060720-30   | cckb               |
| ENSXDARG00000019307 | 12.1831535  | 1.284042777    | 2.435204243         | 0.410643174         | 0.30403951  | 4.223276032 | 2.40777E-05 | 0.00141981  | dup5               | ZDB-GENE-010625-1    | dup5               |
| ENSXDARG00000089697 | 36.44813167 | 1.283804765    | 2.434802522         | 0.410710927         | 0.240916631 | 5.328834123 | 9.88452E-08 | 1.21237E-05 | nfe2l2b            | ZDB-GENE-120320-3    | nfe2l2b            |
| ENSXDARG00000070353 | 9.859538054 | 1.257376936    | 2.390606928         | 0.418303816         | 0.297234925 | 4.230246281 | 2.33436E-05 | 0.001385403 | hoxc13a            | ZDB-GENE-000822-4    | hoxc13a            |
| ENSXDARG00000105863 | 12.23693512 | 1.246272348    | 2.372276789         | 0.421535971         | 0.339397047 | 3.672018829 | 0.000240642 | 0.009432752 | FO904970.1         |                      |                    |
| ENSXDARG00000096739 | 414.1552786 | 1.245374784    | 2.370801349         | 0.421798309         | 0.165104116 | 7.542966318 | 4.594E-14   | 2.28433E-11 | si:dkeyp-219e21.2  | ZDB-GENE-141215-26   | si:dkeyp-219e21.2  |

|                      |             |             |             |             |             |             |             |             |                   |                      |                   |
|----------------------|-------------|-------------|-------------|-------------|-------------|-------------|-------------|-------------|-------------------|----------------------|-------------------|
| ENS DARG00000051711  | 13.36204825 | 1.24348891  | 2.367704291 | 0.422350039 | 0.300128844 | 4.143183618 | 3.42517E-05 | 0.001881148 | CR339041.2        |                      |                   |
| ENS DARG00000095005  | 11.38085897 | 1.236975388 | 2.357038604 | 0.424261189 | 0.421357912 | 2.93568805  | 0.003328088 | 0.067064805 | si:dkey-21e2.10   | ZDB-GENE-050208-778  | si:dkey-21e2.10   |
| ENS DARG00000052923  | 30.12429813 | 1.229295924 | 2.344525425 | 0.426525552 | 0.215328407 | 5.708935206 | 1.13685E-08 | 1.83472E-06 | zgc:113162        | ZDB-GENE-050522-530  | zgc:113162        |
| ENS DARG00000030110  | 47.98595101 | 1.22242505  | 2.333386105 | 0.428561736 | 0.168904113 | 7.237390674 | 4.57399E-13 | 1.68305E-10 | myod1             | ZDB-GENE-980526-561  | myod1             |
| ENS DARG00000096975  | 13.33251    | 1.221959693 | 2.332633567 | 0.428699996 | 0.441009369 | 2.770824792 | 0.00559145  | 0.097508536 | si:dkeyp-93a5.3   | ZDB-GENE-131127-100  | si:dkeyp-93a5.3   |
| ENS DARG00000099002  | 20.51600954 | 1.21901894  | 2.327883629 | 0.429574738 | 0.245892061 | 4.957536804 | 7.13925E-07 | 6.53472E-05 | creb5a            | ZDB-GENE-120827-2    | creb5a            |
| ENS DARG00000089983  | 9.698777427 | 1.214844218 | 2.321157176 | 0.430819597 | 0.36477423  | 3.330400339 | 0.000867212 | 0.025165563 | si:ch73-109i22.2  | ZDB-GENE-141211-57   | si:ch73-109i22.2  |
| ENS DARG00000019566  | 14.51538186 | 1.186779608 | 2.276440273 | 0.439282336 | 0.340480638 | 3.485600872 | 0.000491033 | 0.016545826 | neurod1           | ZDB-GENE-990415-172  | neurod1           |
| ENS DARG00000076773  | 126.57819   | 1.185890151 | 2.275037225 | 0.439553247 | 0.232722744 | 5.095720914 | 3.47417E-07 | 3.63169E-05 | lrrc58a           | ZDB-GENE-090312-76   | lrrc58a           |
| ENS DARG00000052011  | 7.345651252 | 1.183074002 | 2.27060067  | 0.440412096 | 0.388599102 | 3.044458916 | 0.002330993 | 0.051298568 | rpad              | ZDB-GENE-030131-5607 | rpad              |
| ENS DARG00000088082  | 16.98874144 | 1.177913574 | 2.262493385 | 0.441990242 | 0.277257364 | 4.248448286 | 2.15256E-05 | 0.001294211 | si:ch211-214c20.1 | ZDB-GENE-081103-49   | si:ch211-214c20.1 |
| ENS DARG00000089156  | 15.70968608 | 1.176551793 | 2.260358791 | 0.442407641 | 0.25358884  | 4.639603977 | 3.49077E-06 | 0.000269846 | egr3              | ZDB-GENE-040718-394  | egr3              |
| ENS DARG00000093957  | 13.40271049 | 1.176235625 | 2.259863486 | 0.442504605 | 0.362169089 | 3.247752664 | 0.001163203 | 0.031196233 | si:dkey-25i110.2  | ZDB-GENE-050506-102  | si:dkey-25i110.2  |
| ENS DARG00000043850  | 11.33274158 | 1.172507056 | 2.25403053  | 0.443649714 | 0.369631293 | 2.958177494 | 0.003094639 | 0.063402187 | ftf54             | ZDB-GENE-070620-19   | ftf54             |
| ENS DARG00000101055  | 10.18017549 | 1.171380057 | 2.252270422 | 0.443996418 | 0.40099056  | 2.921216041 | 0.00348668  | 0.069274223 | trim35-25         | ZDB-GENE-060503-484  | trim35-25         |
| ENS DARG00000089622  | 4.50161354  | 1.165210109 | 2.242658745 | 0.445899316 | 0.399301753 | 2.918119191 | 0.003521497 | 0.069740048 | fgd5b             | ZDB-GENE-130925-3    | fgd5b             |
| ENS DARG00000055331  | 13.85670354 | 1.153082321 | 2.223885208 | 0.449663497 | 0.389690441 | 2.958969996 | 0.003086692 | 0.063309867 | aldh9a1a.2        | ZDB-GENE-081104-507  | aldh9a1a.2        |
| ENS DARG00000054978  | 175.347479  | 1.151514139 | 2.221469201 | 0.450152539 | 0.17427913  | 6.607297951 | 3.91398E-11 | 1.00013E-08 | kifc3             | ZDB-GENE-030131-3724 | kifc3             |
| ENS DARG00000095136  | 5.283697681 | 1.150825483 | 2.220409057 | 0.450367466 | 0.36493403  | 3.153516492 | 0.001613161 | 0.040160945 | si:ch211-130m23.2 | ZDB-GENE-060531-13   | si:ch211-130m23.2 |
| ENS DARG00000075956  | 4.167582303 | 1.149839149 | 2.218891539 | 0.450675476 | 0.40563411  | 2.834670753 | 0.004587294 | 0.083977142 | faxca             | ZDB-GENE-100422-7    | faxca             |
| ENS DARG00000058606  | 252.7151589 | 1.14156154  | 2.206196877 | 0.453268704 | 0.211956624 | 5.385826215 | 7.21126E-08 | 9.21339E-06 | sik1              | ZDB-GENE-030131-9446 | sik1              |
| ENS DARG00000057491  | 54.54362013 | 1.140437787 | 2.204479081 | 0.45621905  | 0.290180199 | 8.779713016 | 1.63892E-18 | 2.51274E-15 | n4bp1             | ZDB-GENE-101026-3    | n4bp1             |
| ENS DARG00000068638  | 9.714433096 | 1.136131553 | 2.197908843 | 0.454977923 | 0.319827669 | 3.552324155 | 0.000381844 | 0.013562101 | lpar5b            | ZDB-GENE-081022-116  | lpar5b            |
| ENS DARG00000040890  | 333.4751576 | 1.122049668 | 2.176559815 | 0.459440624 | 0.353385533 | 3.175143186 | 0.001497626 | 0.038215423 | fdps              | ZDB-GENE-050506-78   | fdps              |
| ENS DARG00000044691  | 97.6651015  | 1.119219609 | 2.172294357 | 0.460342769 | 0.249417733 | 4.487329724 | 7.21214E-06 | 0.00050261  | ppp1r3b           | ZDB-GENE-030131-5496 | ppp1r3b           |
| ENS DARG000000102299 | 26.05768673 | 1.107774745 | 2.155129773 | 0.46400918  | 0.290180199 | 3.817540786 | 0.000134789 | 0.005890354 | cxcl8b.1          | ZDB-GENE-101026-3    | cxcl8b.1          |
| ENS DARG00000110016  | 4.76120249  | 1.104764997 | 2.150638431 | 0.464978206 | 0.383206259 | 2.88295134  | 0.003939683 | 0.075290747 | msc               | ZDB-GENE-090806-3    | msc               |
| ENS DARG00000037533  | 1384.189644 | 1.104287611 | 2.149926906 | 0.465132092 | 0.229290517 | 4.816106771 | 1.46386E-06 | 0.000123408 | mep1b             | ZDB-GENE-041014-209  | mep1b             |
| ENS DARG00000079946  | 210.1461034 | 1.103012729 | 2.148027896 | 0.465543302 | 0.39627206  | 2.783473379 | 0.005378028 | 0.094774857 | sqlea             | ZDB-GENE-071004-98   | sqlea             |
| ENS DARG00000057394  | 8.897573746 | 1.102614652 | 2.147435281 | 0.466567176 | 0.27469404  | 3.971253242 | 7.14955E-05 | 0.003545485 | rab33a            | ZDB-GENE-060825-283  | rab33a            |
| ENS DARG00000007823  | 69.5699399  | 1.098658715 | 2.141554978 | 0.466950422 | 0.242386129 | 4.532679826 | 5.82401E-06 | 0.000425199 | atf3              | ZDB-GENE-040426-728  | atf3              |
| ENS DARG00000095102  | 13.3069466  | 1.081724928 | 2.116565196 | 0.472463594 | 0.345397719 | 3.131824182 | 0.001737239 | 0.042389547 | si:ch211-132g1.4  | ZDB-GENE-090313-26   | si:ch211-132g1.4  |
| ENS DARG00000099564  | 7.341359318 | 1.079412118 | 2.11317481  | 0.473221617 | 0.341190354 | 3.163665397 | 0.001557958 | 0.039157529 | atoh1b            | ZDB-GENE-041201-1    | atoh1b            |
| ENS DARG00000061580  | 17.78476483 | 1.073613885 | 2.104698944 | 0.475127335 | 0.238221131 | 4.506795356 | 6.56141E-06 | 0.000471147 | ktcd7             | ZDB-GENE-060804-2    | ktcd7             |
| ENS DARG00000022183  | 78.93101766 | 1.063167072 | 2.089513488 | 0.478580304 | 0.20764712  | 5.120066531 | 3.05428E-07 | 3.24813E-05 | gstot1            | ZDB-GENE-040718-365  | gstot1            |
| ENS DARG00000094606  | 11.92995383 | 1.060063188 | 2.085022841 | 0.479611053 | 0.287719876 | 3.684358564 | 0.000229279 | 0.009052104 | si:zfos-364h11.2  | ZDB-GENE-120703-46   | si:zfos-364h11.2  |
| ENS DARG00000071495  | 55.68858541 | 1.034921738 | 2.04900249  | 0.488042355 | 0.278380465 | 3.71765216  | 0.000201083 | 0.008130819 | sult3st5          | ZDB-GENE-060503-722  | sult3st5          |
| ENS DARG00000100872  | 12.81436278 | 1.034283455 | 2.048096162 | 0.488258324 | 0.255757751 | 4.043996518 | 5.25477E-05 | 0.002738733 | otud1             | ZDB-GENE-170421-2    | otud1             |
| ENS DARG00000067985  | 9.041421833 | 1.034187183 | 2.047959497 | 0.488290907 | 0.303363132 | 4.090733395 | 0.000651839 | 0.020328844 | ftf23             | ZDB-GENE-070912-322  | ftf23             |
| ENS DARG00000002634  | 11.71274907 | 1.031586457 | 2.044270995 | 0.489171936 | 0.298819887 | 3.45220148  | 0.000556032 | 0.018138091 | b4galt1           | ZDB-GENE-050417-236  | b4galt1           |
| ENS DARG00000098063  | 144.4911027 | 1.025499302 | 2.035663784 | 0.491240257 | 0.267768914 | 3.829792213 | 0.000128252 | 0.005699447 | alp3              | ZDB-GENE-120919-1    | alp3              |
| ENS DARG00000093048  | 8.812736067 | 1.020036814 | 2.027970707 | 0.493103769 | 0.319722892 | 3.190377788 | 0.001420869 | 0.036818524 | si:ch211-158d24.4 | ZDB-GENE-081104-141  | si:ch211-158d24.4 |
| ENS DARG00000105641  | 38.26533107 | 1.007902322 | 2.010985003 | 0.497268751 | 0.224387891 | 4.491785709 | 7.06285E-06 | 0.000494762 | si:ch211-98n17.5  | ZDB-GENE-160728-87   | si:ch211-98n17.5  |
| ENS DARG00000100947  | 5.909893015 | 1.00660588  | 2.009178692 | 0.49771581  | 0.330188712 | 3.048577508 | 0.002299276 | 0.050749147 | mafK              | ZDB-GENE-040624-9    | mafK              |
| ENS DARG00000056986  | 40.59267571 | 0.999001297 | 1.998615982 | 0.500346244 | 0.213012566 | 4.689870242 | 2.73378E-06 | 0.000221569 | dact2             | ZDB-GENE-030131-9975 | dact2             |
| ENS DARG00000098746  | 132.7075347 | 0.997853241 | 1.997026173 | 0.500744564 | 0.232315076 | 4.295258228 | 1.7449E-05  | 0.001091928 | dhfr13l1          | ZDB-GENE-040426-1907 | dhfr13l1          |
| ENS DARG00000099717  | 9.223042743 | 0.988172403 | 1.983670497 | 0.504115982 | 0.27733464  | 3.015170901 | 0.002568345 | 0.055446489 | si:rp71-1h20.9    | ZDB-GENE-131127-386  | si:rp71-1h20.9    |
| ENS DARG00000077874  | 16.39344225 | 0.987735496 | 1.983069852 | 0.504268672 | 0.307865514 | 3.20833433  | 0.001335062 | 0.034840384 | vwa10.1           | ZDB-GENE-090313-291  | vwa10.1           |
| ENS DARG00000071636  | 9.380285472 | 0.986689251 | 1.981632248 | 0.504634501 | 0.321429242 | 3.069693487 | 0.002142786 | 0.04861032  | BX511034.2        |                      |                   |
| ENS DARG00000017982  | 92.65465618 | 0.976027972 | 1.967042287 | 0.50837748  | 0.285620271 | 3.417222351 | 0.000632636 | 0.019896128 | cyp39a1           | ZDB-GENE-041014-339  | cyp39a1           |
| ENS DARG00000037551  | 122.8325767 | 0.974185556 | 1.964531847 | 0.509027126 | 0.257940424 | 3.776785118 | 0.001588866 | 0.006828997 | pm20d1.1          | ZDB-GENE-051120-102  | pm20d1.1          |
| ENS DARG00000033854  | 65.19031597 | 0.955954217 | 1.939862259 | 0.515500518 | 0.210735814 | 4.536268411 | 5.72583E-06 | 0.000419696 | abrab             | ZDB-GENE-040822-7    | abrab             |
| ENS DARG00000060315  | 52.0388827  | 0.951020355 | 1.933239471 | 0.517266492 | 0.235066523 | 4.045749878 | 5.21559E-05 | 0.002731014 | rabgap1l2         | ZDB-GENE-070912-414  | rabgap1l2         |
| ENS DARG00000023026  | 25.18395615 | 0.937801404 | 1.915606724 | 0.522027819 | 0.200430373 | 4.678938575 | 2.88364E-06 | 0.000229667 | pkp2              | ZDB-GENE-041210-167  | pkp2              |

|                     |             |             |             |             |             |             |             |             |                   |                      |                   |
|---------------------|-------------|-------------|-------------|-------------|-------------|-------------|-------------|-------------|-------------------|----------------------|-------------------|
| ENSDARG00000109717  | 9.674464371 | 0.926335923 | 1.900443221 | 0.526193042 | 0.298707768 | 3.1011444   | 0.001927743 | 0.045353719 | SLC35E2A          |                      |                   |
| ENSDARG00000025131  | 12.79802721 | 0.919957087 | 1.892059013 | 0.528524741 | 0.245595297 | 3.745825346 | 0.000179802 | 0.007477236 | lxb2              | ZDB-GENE-001206-2    | lxb2              |
| ENSDARG00000054534  | 159.2820626 | 0.916959105 | 1.888131316 | 0.52962418  | 0.228892218 | 4.006073746 | 6.17364E-05 | 0.003133923 | ACOT12            |                      |                   |
| ENSDARG00000016290  | 1333.734282 | 0.908840157 | 1.877535462 | 0.532613109 | 0.200795194 | 4.526204735 | 6.00524E-06 | 0.000436697 | clca1             | ZDB-GENE-030131-6221 | clca1             |
| ENSDARG00000045444  | 73.01851394 | 0.895998936 | 1.860897943 | 0.537374983 | 0.184131522 | 4.866081186 | 1.13833E-06 | 9.87875E-05 | fdz8a             | ZDB-GENE-000328-3    | fdz8a             |
| ENSDARG00000032206  | 161.7396735 | 0.890968706 | 1.854420867 | 0.539251913 | 0.176746756 | 5.040933851 | 4.63236E-07 | 4.58234E-05 | ctlhl             | ZDB-GENE-040905-3    | ctlhl             |
| ENSDARG00000056029  | 19.14821349 | 0.888794866 | 1.851628747 | 0.540065065 | 0.208622331 | 4.260305515 | 2.04148E-05 | 0.001239574 | cyp26c1           | ZDB-GENE-050714-2    | cyp26c1           |
| ENSDARG00000022000  | 21.74508125 | 0.886037536 | 1.848093228 | 0.541098244 | 0.229398227 | 3.862442817 | 0.000112259 | 0.005163346 | traf3             | ZDB-GENE-040801-257  | traf3             |
| ENSDARG00000100504  | 113.1515944 | 0.882921608 | 1.844106029 | 0.542268169 | 0.266645909 | 3.311213776 | 0.000928922 | 0.026578361 | ppp1r27b          | ZDB-GENE-051023-5    | ppp1r27b          |
| ENSDARG000000021059 | 1652.405435 | 0.882249585 | 1.843247225 | 0.542520822 | 0.289905565 | 3.043230938 | 0.002340526 | 0.05144684  | alas1             | ZDB-GENE-001229-2    | alas1             |
| ENSDARG00000069335  | 58.73605119 | 0.875669671 | 1.834859595 | 0.545000829 | 0.153528471 | 5.703630513 | 1.17282E-08 | 1.84424E-06 | bcl6b             | ZDB-GENE-120907-1    | bcl6b             |
| ENSDARG00000078349  | 193.4461066 | 0.86923485  | 1.826693836 | 0.547437113 | 0.207100258 | 4.197169331 | 2.70272E-05 | 0.001573564 | zmp:0000000845    | ZDB-GENE-130530-848  | zmp:0000000845    |
| ENSDARG00000092162  | 30.65475356 | 0.86580919  | 1.822361521 | 0.54873854  | 0.257217679 | 3.366056305 | 0.000762511 | 0.022960205 | mhc1zaa           | ZDB-GENE-030916-1    | mhc1zaa           |
| ENSDARG000000102981 | 34.0366806  | 0.859844447 | 1.814842622 | 0.551011965 | 0.223584354 | 3.845727276 | 0.000120195 | 0.005460135 | cyp2k16           | ZDB-GENE-041010-37   | cyp2k16           |
| ENSDARG00000035601  | 42.50612471 | 0.858087461 | 1.812633762 | 0.551683424 | 0.257234478 | 3.335818233 | 0.000850488 | 0.024876422 | dao.3             | ZDB-GENE-040426-1894 | dao.3             |
| ENSDARG00000003615  | 359.5433546 | 0.856097354 | 1.81013507  | 0.552444962 | 0.222148373 | 3.853718177 | 0.000116337 | 0.005337586 | slc26a3.2         | ZDB-GENE-041210-179  | slc26a3.2         |
| ENSDARG00000053479  | 22.40783839 | 0.853603463 | 1.807008714 | 0.553400762 | 0.237930084 | 3.587623093 | 0.000333706 | 0.012230133 | gdf6a             | ZDB-GENE-980526-373  | gdf6a             |
| ENSDARG000000046127 | 13.67938464 | 0.853345529 | 1.806685674 | 0.553499712 | 0.250950454 | 3.40045422  | 0.00067274  | 0.020836819 | tk2               | ZDB-GENE-040718-243  | tk2               |
| ENSDARG00000101062  | 95.57808635 | 0.852939173 | 1.806176867 | 0.553655635 | 0.254048753 | 3.357383822 | 0.000786838 | 0.023576948 | fdft1             | ZDB-GENE-081104-242  | fdft1             |
| ENSDARG00000077875  | 145.6146329 | 0.844241463 | 1.795320558 | 0.557003592 | 0.251603091 | 3.355449483 | 0.000792361 | 0.023665361 | slc2a5            | ZDB-GENE-060222-2    | slc2a5            |
| ENSDARG00000069190  | 13.50531559 | 0.83405542  | 1.782689471 | 0.560950191 | 0.286163298 | 2.914613534 | 0.003561292 | 0.070150598 | zgc:172339        | ZDB-GENE-080204-115  | zgc:172339        |
| ENSDARG00000002920  | 20.98788402 | 0.832250042 | 1.780460022 | 0.56165626  | 0.292152371 | 2.848684884 | 0.004390034 | 0.081501354 | BX629344.1        |                      |                   |
| ENSDARG00000006514  | 57.95068299 | 0.831663853 | 1.779736741 | 0.561880854 | 0.150335466 | 5.532053595 | 3.16503E-08 | 4.4837E-06  | her6              | ZDB-GENE-980526-144  | her6              |
| ENSDARG00000059963  | 10.2121572  | 0.821397186 | 1.767116537 | 0.565893635 | 0.297000241 | 2.765644847 | 0.005681037 | 0.098696616 | polk              | ZDB-GENE-060526-137  | polk              |
| ENSDARG00000092788  | 24.4879528  | 0.819757734 | 1.76510956  | 0.566537071 | 0.227820635 | 3.59825937  | 0.000320354 | 0.011858901 | si:dkey-21e2.15   | ZDB-GENE-050208-780  | si:dkey-21e2.15   |
| ENSDARG00000032618  | 63.10175182 | 0.817562708 | 1.76242603  | 0.5673997   | 0.182011719 | 4.491813568 | 7.06192E-06 | 0.000494762 | mgst1.1           | ZDB-GENE-041010-30   | mgst1.1           |
| ENSDARG00000002172  | 10.39495934 | 0.815521691 | 1.759934445 | 0.568202982 | 0.286339343 | 2.848095139 | 0.004398177 | 0.08157023  | aplnra            | ZDB-GENE-060929-512  | aplnra            |
| ENSDARG00000100972  | 63.12531367 | 0.811270387 | 1.75475594  | 0.56987982  | 0.248066195 | 3.270378649 | 0.001074036 | 0.029492711 | myh11b            | ZDB-GENE-101124-2    | myh11b            |
| ENSDARG00000058218  | 190.7421744 | 0.809194712 | 1.752233102 | 0.570700324 | 0.180919693 | 4.472673486 | 7.72477E-06 | 0.000531151 | fam151a           | ZDB-GENE-070705-105  | fam151a           |
| ENSDARG00000074258  | 28.43671042 | 0.808463367 | 1.751345069 | 0.570989703 | 0.265764162 | 3.042033064 | 0.002349861 | 0.051528891 | gramd1bb          | ZDB-GENE-140106-106  | gramd1bb          |
| ENSDARG00000008164  | 16.11564009 | 0.802621357 | 1.744267559 | 0.573306541 | 0.242670508 | 3.307453234 | 0.000941484 | 0.026797518 | btr33             | ZDB-GENE-090512-4    | btr33             |
| ENSDARG00000006837  | 35.2380218  | 0.799639636 | 1.740666279 | 0.57449266  | 0.19150665  | 4.1755189   | 2.97308E-05 | 0.00168823  | mycn              | ZDB-GENE-020711-1    | mycn              |
| ENSDARG00000056725  | 305.5644085 | 0.799452877 | 1.740440962 | 0.574567033 | 0.154194188 | 5.184714719 | 2.16346E-07 | 2.42703E-05 | hmgb3a            | ZDB-GENE-050428-1    | hmgb3a            |
| ENSDARG00000026335  | 45.24371311 | 0.795688728 | 1.73590588  | 0.576068099 | 0.223207898 | 3.564787513 | 0.00364151  | 0.013085257 | susd4             | ZDB-GENE-110511-1    | susd4             |
| ENSDARG00000003909  | 27.45707316 | 0.794814123 | 1.734853842 | 0.576417434 | 0.259699521 | 3.060514405 | 0.002209571 | 0.049394524 | ftr01             | ZDB-GENE-070705-491  | ftr01             |
| ENSDARG00000104256  | 596.5516143 | 0.792934614 | 1.732595186 | 0.577168867 | 0.229099322 | 3.461095419 | 0.000537982 | 0.017732747 | bco1              | ZDB-GENE-010508-1    | bco1              |
| ENSDARG000000067850 | 154.0298498 | 0.791845625 | 1.731287866 | 0.577604695 | 0.164439934 | 4.815409541 | 1.46898E-06 | 0.000123408 | jund              | ZDB-GENE-070725-2    | jund              |
| ENSDARG00000070000  | 162.2958168 | 0.789100228 | 1.72799642  | 0.578704903 | 0.215750176 | 3.657472008 | 0.000254715 | 0.009822449 | txnipb            | ZDB-GENE-040917-1    | txnipb            |
| ENSDARG00000088440  | 141.5108046 | 0.787830943 | 1.726476794 | 0.579214272 | 0.119033797 | 6.618548353 | 3.62743E-11 | 9.39965E-09 | ssh2a             | ZDB-GENE-030131-3810 | ssh2a             |
| ENSDARG00000057035  | 109.3087542 | 0.784267844 | 1.722218085 | 0.580646556 | 0.254649649 | 3.079791573 | 0.002071455 | 0.047460311 | stoml3b           | ZDB-GENE-050417-366  | stoml3b           |
| ENSDARG00000004218  | 33.86757041 | 0.781728061 | 1.719188885 | 0.581669652 | 0.219014069 | 3.569305218 | 0.000357929 | 0.012886853 | rnd1b             | ZDB-GENE-060315-7    | rnd1b             |
| ENSDARG00000059836  | 103.4866718 | 0.779112162 | 1.716074471 | 0.582725293 | 0.140840408 | 5.531879486 | 3.16818E-08 | 4.4837E-06  | ddit3             | ZDB-GENE-070410-90   | ddit3             |
| ENSDARG00000004032  | 195.8960077 | 0.776458537 | 1.712920907 | 0.583798117 | 0.143126265 | 5.424989855 | 5.79578E-08 | 7.67128E-06 | klf2b             | ZDB-GENE-011109-2    | klf2b             |
| ENSDARG00000086881  | 19.32401464 | 0.776371788 | 1.712817912 | 0.583833222 | 0.239384689 | 3.243197346 | 0.001181963 | 0.031595687 | ier2b             | ZDB-GENE-030131-8244 | ier2b             |
| ENSDARG00000092931  | 103.4164754 | 0.775019782 | 1.711213515 | 0.584380611 | 0.224627303 | 3.450247462 | 0.000560073 | 0.018205338 | si:ch211-114c12.5 | ZDB-GENE-060526-13   | si:ch211-114c12.5 |
| ENSDARG00000058678  | 39.60193673 | 0.771215195 | 1.706706753 | 0.585923738 | 0.205412367 | 3.754473053 | 0.000173707 | 0.007313164 | aqp10b            | ZDB-GENE-060503-57   | aqp10b            |
| ENSDARG00000018162  | 13.2323847  | 0.769330887 | 1.704479073 | 0.586689515 | 0.232928002 | 3.302869896 | 0.000957008 | 0.027129475 | ctnna1            | ZDB-GENE-060503-507  | ctnna1            |
| ENSDARG00000075121  | 79.03295884 | 0.764953397 | 1.699315105 | 0.588472378 | 0.182383899 | 4.194193681 | 2.73844E-05 | 0.001579367 | hbegfa            | ZDB-GENE-080204-119  | hbegfa            |
| ENSDARG00000075116  | 19.77039295 | 0.764764993 | 1.699093203 | 0.588549232 | 0.243746107 | 3.137547513 | 0.001703677 | 0.041736674 | sall2             | ZDB-GENE-030829-32   | sall2             |
| ENSDARG00000036834  | 2065.003506 | 0.764684518 | 1.698998429 | 0.588582063 | 0.184685845 | 4.140460883 | 3.46609E-05 | 0.001892257 | krt92             | ZDB-GENE-050417-363  | krt92             |
| ENSDARG000000040309 | 34.85606374 | 0.762643102 | 1.696596043 | 0.589415497 | 0.171065636 | 4.45818997  | 8.26546E-06 | 0.000565309 | pxdc1b            | ZDB-GENE-091204-294  | pxdc1b            |
| ENSDARG00000043128  | 90.314861   | 0.760878396 | 1.694522033 | 0.590136912 | 0.227445621 | 3.345320049 | 0.000821877 | 0.024229849 | clдне             | ZDB-GENE-010328-5    | clдне             |
| ENSDARG00000078805  | 15.85170744 | 0.759779754 | 1.693232111 | 0.590586484 | 0.22771574  | 3.336527165 | 0.000848321 | 0.024852574 | ap5b1             | ZDB-GENE-131121-204  | ap5b1             |
| ENSDARG00000100498  | 131.2553359 | 0.759416019 | 1.692805264 | 0.590735403 | 0.215594628 | 3.522425521 | 0.000427617 | 0.014788159 | CABZ01079251.1    |                      |                   |

|                     |             |             |             |             |              |             |             |             |                     |                      |                   |
|---------------------|-------------|-------------|-------------|-------------|--------------|-------------|-------------|-------------|---------------------|----------------------|-------------------|
| ENSDARG0000052695   | 39.55225894 | 0.757841694 | 1.690959017 | 0.591380388 | 0.155615397  | 4.869966024 | 1.11617E-06 | 9.73241E-05 | nr2f1a              | ZDB-GENE-980526-115  | nr2f1a            |
| ENSDARG0000029290   | 24.80883529 | 0.751408954 | 1.683436093 | 0.594023144 | 0.231709852  | 3.24288738  | 0.00118325  | 0.031595687 | stx11b.1            | ZDB-GENE-040426-1893 | stx11b.1          |
| ENSDARG0000078297   | 48.75673985 | 0.747824866 | 1.679259123 | 0.59550071  | 0.248043653  | 3.014892169 | 0.002570706 | 0.055446489 | ptprh               | ZDB-GENE-091118-90   | ptprh             |
| ENSDARG0000087873   | 49.56970246 | 0.746979388 | 1.678275296 | 0.5958498   | 0.181964082  | 4.105092505 | 0.04153E-05 | 0.002180531 | eenv                | ZDB-GENE-131121-365  | eenv              |
| ENSDARG0000056680   | 59.08835486 | 0.744131341 | 1.674965454 | 0.597027239 | 0.140709488  | 5.288423359 | 1.23375E-07 | 1.46442E-05 | stc2a               | ZDB-GENE-041008-14   | stc2a             |
| ENSDARG00000105644  | 352.9377829 | 0.738735436 | 1.668712523 | 0.599264395 | 0.1847510634 | 4.003755349 | 6.23448E-05 | 0.003511555 | zgc:172079          | ZDB-GENE-080204-103  | zgc:172079        |
| ENSDARG0000092532   | 16.25035199 | 0.732047434 | 1.660994659 | 0.602048896 | 0.247989782  | 2.951925789 | 0.003157988 | 0.064413156 | si:dkey-21e2.8      | ZDB-GENE-050208-459  | si:dkey-21e2.8    |
| ENSDARG0000088428   | 19.82338175 | 0.731896323 | 1.660820692 | 0.602111959 | 0.218818414  | 3.344765683 | 0.000823521 | 0.024229849 | si:ch211-189a15.5   | ZDB-GENE-141215-48   | si:ch211-189a15.5 |
| ENSDARG0000057231   | 29.24604077 | 0.73010132  | 1.658755582 | 0.602861574 | 0.196482326  | 3.715862565 | 0.000202512 | 0.008168643 | rorca               | ZDB-GENE-990415-250  | rorca             |
| ENSDARG00000094077  | 25.10407659 | 0.724919851 | 1.652808812 | 0.605030656 | 0.259974678  | 2.788424847 | 0.005296503 | 0.093517342 | si:dkey-21e2.16     | ZDB-GENE-050208-698  | si:dkey-21e2.16   |
| ENSDARG0000069388   | 29.35468611 | 0.719808731 | 1.646963669 | 0.607177935 | 0.23065973   | 3.120651922 | 0.001804512 | 0.043626032 | tmem88b             | ZDB-GENE-060929-644  | tmem88b           |
| ENSDARG00000011703  | 15.341191   | 0.714130946 | 1.640494715 | 0.609572217 | 0.2349149    | 3.039955948 | 0.002366128 | 0.05170073  | clocka              | ZDB-GENE-990630-14   | clocka            |
| ENSDARG00000101749  | 211.071462  | 0.711931061 | 1.637995123 | 0.610502428 | 0.174248412  | 4.085724827 | 4.39394E-05 | 0.002336409 | zgc:92161           | ZDB-GENE-040912-22   | zgc:92161         |
| ENSDARG00000006775  | 12.59140365 | 0.708657618 | 1.634282761 | 0.611889218 | 0.230749275  | 3.07111525  | 0.002132608 | 0.048477848 | cas54               | ZDB-GENE-110131-9    | cas54             |
| ENSDARG0000088013   | 22.907854   | 0.708592957 | 1.634209515 | 0.611916643 | 0.251935108  | 2.812601076 | 0.004914258 | 0.088035552 | CYP27A1 (1 of many) | ZDB-GENE-060616-143  | zgc:136333        |
| ENSDARG0000040284   | 44.15278247 | 0.707265998 | 1.632707096 | 0.612479729 | 0.216556505  | 3.265965144 | 0.001090917 | 0.029690365 | si:dkey-79d12.5     | ZDB-GENE-131127-429  | si:dkey-79d12.5   |
| ENSDARG0000075698   | 68.11608632 | 0.706683908 | 1.632048474 | 0.612726899 | 0.237834036  | 2.971332109 | 0.002965109 | 0.061640773 | nkpd1               | ZDB-GENE-141215-19   | nkpd1             |
| ENSDARG000000043722 | 2499.53724  | 0.704950804 | 1.630090977 | 0.613463407 | 0.238134206  | 2.960308871 | 0.000373308 | 0.063135116 | cpa4                | ZDB-GENE-040704-61   | cpa4              |
| ENSDARG0000076964   | 34.64232403 | 0.702117826 | 1.626891261 | 0.614669231 | 0.229056198  | 3.06526448  | 0.002174776 | 0.048973717 | cables2a            | ZDB-GENE-091118-58   | cables2a          |
| ENSDARG00000062085  | 290.5305536 | 0.697728573 | 1.621949131 | 0.616542147 | 0.214426702  | 3.25392578  | 0.00113822  | 0.03070524  | tkfc                | ZDB-GENE-060929-652  | tkfc              |
| ENSDARG00000004451  | 56.88307859 | 0.697439315 | 1.621623965 | 0.616665776 | 0.138158129  | 5.048123613 | 4.4617E-07  | 0.44371E-05 | tnfrsfa             | ZDB-GENE-010802-1    | tnfrsfa           |
| ENSDARG00000037894  | 72.14167567 | 0.696568072 | 1.620644963 | 0.617038292 | 0.181573388  | 3.836289451 | 0.000124907 | 0.007577773 | ezh1                | ZDB-GENE-050114-1    | ezh1              |
| ENSDARG0000013856   | 7064.840046 | 0.695098434 | 1.618994892 | 0.617667174 | 0.237009617  | 2.932785782 | 0.003359356 | 0.067620821 | amy2a               | ZDB-GENE-040426-2393 | amy2a             |
| ENSDARG00000077326  | 207.7107366 | 0.691861004 | 1.615365915 | 0.619054785 | 0.137282826  | 5.039676293 | 4.6632E-07  | 4.58789E-05 | slc45a4             | ZDB-GENE-091230-5    | slc45a4           |
| ENSDARG00000098112  | 25.39579247 | 0.691717894 | 1.615205686 | 0.619116196 | 0.182735246  | 3.785355649 | 0.000153489 | 0.006628847 | btc                 | ZDB-GENE-050311-1    | btc               |
| ENSDARG00000102047  | 18.6979145  | 0.688270213 | 1.611350356 | 0.620597499 | 0.244876424  | 2.810683863 | 0.004943633 | 0.08834142  | mab2111             | ZDB-GENE-020516-1    | mab2111           |
| ENSDARG0000075048   | 205.5960192 | 0.688003798 | 1.611052823 | 0.620712112 | 0.183572033  | 3.747868271 | 0.000178344 | 0.007440296 | lonrf1              | ZDB-GENE-101021-4    | lonrf1            |
| ENSDARG00000079361  | 171.1827592 | 0.686840304 | 1.609754077 | 0.621212901 | 0.193335785  | 3.552577212 | 0.000381477 | 0.013562101 | abcg2b              | ZDB-GENE-050517-36   | abcg2b            |
| ENSDARG0000087782   | 26.20146716 | 0.686625729 | 1.609514673 | 0.621305302 | 0.209548585  | 3.276689885 | 0.001050317 | 0.028927732 | rnf152              | ZDB-GENE-050327-84   | rnf152            |
| ENSDARG00000029795  | 111.2818568 | 0.685056834 | 1.607765329 | 0.621981324 | 0.135323146  | 5.062377389 | 4.1406E-07  | 4.18565E-05 | prxl2b              | ZDB-GENE-040426-2556 | prxl2b            |
| ENSDARG0000059423   | 82.08825674 | 0.684270254 | 1.606888977 | 0.62232053  | 0.132785951  | 5.153182623 | 2.56102E-07 | 2.79885E-05 | prune2              | ZDB-GENE-050309-222  | prune2            |
| ENSDARG0000052215   | 31.78390741 | 0.684185004 | 1.606794028 | 0.622357305 | 0.188529929  | 3.629052469 | 0.000284463 | 0.010724504 | btr02               | ZDB-GENE-060825-228  | btr02             |
| ENSDARG00000102668  | 16.86953856 | 0.68312303  | 1.605611694 | 0.622815593 | 0.219118931  | 3.117590183 | 0.001823362 | 0.04378541  | slc16a5b            | ZDB-GENE-131120-181  | slc16a5b          |
| ENSDARG00000031929  | 71.66825535 | 0.68302874  | 1.605506761 | 0.6228563   | 0.195511792  | 3.493542425 | 0.000476657 | 0.016239889 | stard14             | ZDB-GENE-040426-963  | stard14           |
| ENSDARG0000070491   | 16.03200692 | 0.679569704 | 1.601661975 | 0.624351465 | 0.23596829   | 3.039263601 | 0.002371572 | 0.051758233 | hpcal4              | ZDB-GENE-060503-307  | hpcal4            |
| ENSDARG0000036058   | 38.72445513 | 0.677499401 | 1.599365198 | 0.625248068 | 0.216826701  | 3.124612406 | 0.001780395 | 0.043156396 | gnao1b              | ZDB-GENE-040426-1693 | gnao1b            |
| ENSDARG00000005894  | 162.188521  | 0.677349654 | 1.599199199 | 0.62531297  | 0.181678547  | 3.728286388 | 0.000192786 | 0.007881958 | slc7a9              | ZDB-GENE-080116-2    | slc7a9            |
| ENSDARG00000017165  | 264.2338311 | 0.675841146 | 1.597527921 | 0.62596715  | 0.19447849   | 3.475146001 | 0.000510575 | 0.017048214 | slc3a1              | ZDB-GENE-090313-225  | slc3a1            |
| ENSDARG00000028096  | 29.79748743 | 0.674761343 | 1.596332679 | 0.626435838 | 0.193104632  | 3.494278397 | 0.000475345 | 0.016239889 | cldn23a             | ZDB-GENE-091204-28   | cldn23a           |
| ENSDARG0000036457   | 26.94257658 | 0.670785076 | 1.591939022 | 0.628164764 | 0.183649762  | 3.652523527 | 0.000259676 | 0.009911857 | cacng6a             | ZDB-GENE-060503-440  | cacng6a           |
| ENSDARG00000006220  | 1377.352279 | 0.670228142 | 1.591324593 | 0.628407306 | 0.15214548   | 4.405179449 | 1.05696E-05 | 0.000702022 | ugt1a7              | ZDB-GENE-071004-5    | ugt1a2            |
| ENSDARG00000006220  | 1377.352279 | 0.670228142 | 1.591324593 | 0.628407306 | 0.15214548   | 4.405179449 | 1.05696E-05 | 0.000702022 | ugt1a7              | ZDB-GENE-071004-4    | ugt1a1            |
| ENSDARG00000006220  | 1377.352279 | 0.670228142 | 1.591324593 | 0.628407306 | 0.15214548   | 4.405179449 | 1.05696E-05 | 0.000702022 | ugt1a7              | ZDB-GENE-080227-5    | ugt1a6            |
| ENSDARG00000006220  | 1377.352279 | 0.670228142 | 1.591324593 | 0.628407306 | 0.15214548   | 4.405179449 | 1.05696E-05 | 0.000702022 | ugt1a7              | ZDB-GENE-080227-6    | ugt1a7            |
| ENSDARG00000102977  | 318.0653601 | 0.670082905 | 1.591164402 | 0.628470571 | 0.193707479  | 3.459251597 | 0.000541679 | 0.017732747 | cant1b              | ZDB-GENE-040801-114  | cant1b            |
| ENSDARG00000044541  | 16.16377941 | 0.669992054 | 1.591064204 | 0.628510149 | 0.240040457  | 2.79116305  | 0.005251901 | 0.092997566 | ppp1r14ba           | ZDB-GENE-060825-331  | ppp1r14ba         |
| ENSDARG00000099518  | 98.89036975 | 0.669389816 | 1.59040017  | 0.628772568 | 0.228611136  | 2.92807178  | 0.000410713 | 0.016239889 | si:ch211-119e14.1   | ZDB-GENE-141216-162  | si:ch211-119e14.1 |
| ENSDARG0000009901   | 79.68674766 | 0.668035645 | 1.588908057 | 0.629363037 | 0.1697501    | 3.935406486 | 8.3056E-05  | 0.004031832 | slc38a5a            | ZDB-GENE-081105-92   | slc38a5a          |
| ENSDARG00000056226  | 221.7050368 | 0.665996513 | 1.586663851 | 0.630253219 | 0.145837227  | 4.5667113   | 4.95436E-06 | 0.000372042 | creb3l3a            | ZDB-GENE-030131-4298 | creb3l3a          |
| ENSDARG00000098239  | 19.46813455 | 0.665888416 | 1.586544972 | 0.630300444 | 0.230201146  | 2.892637272 | 0.003820222 | 0.073596277 | zgc:85932           | ZDB-GENE-040426-2460 | zgc:85932         |
| ENSDARG000000090072 | 109.9263968 | 0.661366483 | 1.581579945 | 0.632279135 | 0.133069426  | 4.97008595  | 6.69232E-07 | 6.21845E-05 | CU462878.1          |                      |                   |
| ENSDARG0000034941   | 57.295966   | 0.660743654 | 1.580897305 | 0.632552157 | 0.217295566  | 3.04075995  | 0.002359819 | 0.051627457 | si:dkey-224e22.2    | ZDB-GENE-061207-59   | si:dkey-224e22.2  |
| ENSDARG00000102082  | 98.59800528 | 0.659552778 | 1.579592889 | 0.633074514 | 0.190082823  | 3.469817878 | 0.000520811 | 0.017327103 | nr3c2               | ZDB-GENE-060531-23   | nr3c2             |
| ENSDARG00000077130  | 34.59171923 | 0.654598976 | 1.57417832  | 0.635252047 | 0.167790852  | 3.901279297 | 9.56857E-05 | 0.004537178 | bcl10               | ZDB-GENE-100219-2    | bcl10             |

|                     |              |             |              |              |             |             |             |             |                   |                      |                   |
|---------------------|--------------|-------------|--------------|--------------|-------------|-------------|-------------|-------------|-------------------|----------------------|-------------------|
| ENSDARG0000002777   | 31.81930271  | 0.65391414  | 1.573431247  | 0.635553668  | 0.20604623  | 3.173628264 | 0.001505464 | 0.038309157 | tnfaip3           | ZDB-GENE-100212-2    | tnfaip3           |
| ENSDARG00000032816  | 131.045699   | 0.653346868 | 1.572812691  | 0.635803618  | 0.208457746 | 3.134193289 | 0.001723273 | 0.042160608 | tm7sf2            | ZDB-GENE-041212-19   | tm7sf2            |
| ENSDARG0000003109   | 276.1385781  | 0.648482361 | 1.567518382  | 0.637951051  | 0.172055127 | 3.769038286 | 0.000163878 | 0.00697922  | rca1a             | ZDB-GENE-040801-135  | rca1a             |
| ENSDARG00000101671  | 33.41206262  | 0.643473906 | 1.562086025  | 0.640169609  | 0.228641979 | 2.814329678 | 0.004887907 | 0.087876185 | zgc:158417        | ZDB-GENE-061201-36   | zgc:158417        |
| ENSDARG00000099113  | 15.83244595  | 0.639618519 | 1.557917156  | 0.641882655  | 0.218228101 | 2.930963134 | 0.003379129 | 0.067870318 | UNC13B            |                      |                   |
| ENSDARG00000060705  | 38.34892089  | 0.639519936 | 1.557810703  | 0.641926518  | 0.199884118 | 3.199453478 | 0.001376884 | 0.035279073 | nsd1b             | ZDB-GENE-080519-2    | nsd1b             |
| ENSDARG0000052279   | 103.4152063  | 0.63821256  | 1.556399649  | 0.642508497  | 0.204945346 | 3.114062226 | 0.001845306 | 0.044205643 | osgn1             | ZDB-GENE-040426-864  | osgn1             |
| ENSDARG00000043281  | 59.00563034  | 0.632509844 | 1.550259622  | 0.645053245  | 0.20530435  | 3.080839953 | 0.002064176 | 0.047352499 | stap2b            | ZDB-GENE-040426-2540 | stap2b            |
| ENSDARG00000089791  | 74.81133174  | 0.63189194  | 1.549595791  | 0.645329579  | 0.213637417 | 2.95777748  | 0.003098657 | 0.063413899 | slc25a32a         | ZDB-GENE-040426-758  | slc25a32a         |
| ENSDARG00000076638  | 19.40953919  | 0.630935553 | 1.548568878  | 0.645757521  | 0.210791721 | 2.993170468 | 0.002760955 | 0.058497689 | FO082781.1        |                      |                   |
| ENSDARG00000102138  | 33.86003672  | 0.630088669 | 1.547660111  | 0.646136702  | 0.205478937 | 3.06643921  | 0.002166249 | 0.048901399 | foxa1             | ZDB-GENE-990415-78   | foxa1             |
| ENSDARG00000076895  | 75.79404621  | 0.629180655 | 1.54668634   | 0.6465435    | 0.126584645 | 4.970434269 | 6.68031E-07 | 6.21845E-05 | flrt3             | ZDB-GENE-030131-1988 | flrt3             |
| ENSDARG00000114554  | 177.2695806  | 0.627848075 | 1.545258365  | 0.647140972  | 0.208071706 | 3.017460119 | 0.002549026 | 0.055172914 | cdx1a             | ZDB-GENE-050510-1    | cdx1a             |
| ENSDARG00000068749  | 64.13939871  | 0.62393492  | 1.541072698  | 0.648898654  | 0.200633987 | 3.109816691 | 0.001872035 | 0.044558825 | si:ch211-250k18.5 | ZDB-GENE-070912-244  | si:ch211-250k18.5 |
| ENSDARG00000025788  | 98.63654305  | 0.623481251 | 1.540588168  | 0.649102739  | 0.136427337 | 4.570060977 | 4.87582E-06 | 0.000367645 | chp2              | ZDB-GENE-030131-5810 | chp2              |
| ENSDARG00000023217  | 101.6487932  | 0.61990808  | 1.536777264  | 0.650712386  | 0.169902099 | 3.648619317 | 0.000263653 | 0.010022099 | crema             | ZDB-GENE-030131-7031 | crema             |
| ENSDARG00000099177  | 43.28215329  | 0.616927288 | 1.533605364  | 0.652058231  | 0.174656748 | 3.532227038 | 0.000412075 | 0.014413238 | dok1b             | ZDB-GENE-040426-2063 | dok1b             |
| ENSDARG00000076781  | 18.8958907   | 0.610607896 | 1.526902451  | 0.654920686  | 0.192927151 | 3.164966123 | 0.00155101  | 0.05942606  | trim45            | ZDB-GENE-070912-389  | trim45            |
| ENSDARG00000116833  | 41.11459397  | 0.6095961   | 1.525831974  | 0.655380158  | 0.202416744 | 3.011589302 | 0.002598839 | 0.055987645 | CABZ01077220.2    |                      |                   |
| ENSDARG00000070581  | 93.41813664  | 0.603215489 | 1.519098574  | 0.658285129  | 0.165877216 | 3.636518048 | 0.000276348 | 0.01043995  | ggact.1           | ZDB-GENE-061103-94   | ggact.1           |
| ENSDARG00000076594  | 43.1651211   | 0.602778828 | 1.518638858  | 0.658484402  | 0.140439449 | 4.292090537 | 1.76999E-05 | 0.001103872 | pcdh12            | ZDB-GENE-140106-126  | pcdh12            |
| ENSDARG00000022295  | 99.229398715 | 0.600940055 | 1.516704224  | 0.659324202  | 0.188469119 | 3.188533269 | 0.001429966 | 0.036898325 | hnf1bb            | ZDB-GENE-030131-3003 | hnf1bb            |
| ENSDARG00000020952  | 254.5057875  | 0.599938405 | 1.515651856  | 0.659782124  | 0.189558874 | 3.164918596 | 0.001551263 | 0.039042606 | si:ch211-214j8.1  | ZDB-GENE-060526-100  | si:ch211-214j8.1  |
| ENSDARG00000012539  | 164.8066131  | 0.598812759 | 1.514469747  | 0.660297112  | 0.216101015 | 2.770985403 | 0.000588693 | 0.097508536 | dnase1            | ZDB-GENE-040718-423  | dnase1            |
| ENSDARG000000114063 | 285.1826125  | 0.598482311 | 1.514122899  | 0.66044837   | 0.204753434 | 2.922941504 | 0.003467417 | 0.069115416 | parm1             | ZDB-GENE-140106-262  | parm1             |
| ENSDARG00000077176  | 45.10772219  | 0.598240206 | 1.513868828  | 0.660559212  | 0.18546257  | 3.225665463 | 0.001256802 | 0.03032338  | zgc:174888        | ZDB-GENE-030328-33   | zgc:174888        |
| ENSDARG00000063297  | 18.98420358  | 0.597747934 | 1.513352359  | 0.660784644  | 0.206381552 | 2.896324451 | 0.003775618 | 0.073119814 | abcb6a            | ZDB-GENE-050517-9    | abcb6a            |
| ENSDARG00000045695  | 50.49081277  | 0.596693375 | 1.512246556  | 0.661267831  | 0.180725803 | 3.301650156 | 0.000961179 | 0.027205794 | myca              | ZDB-GENE-990415-162  | myca              |
| ENSDARG00000032496  | 126.4930216  | 0.596542788 | 1.512088717  | 0.661336857  | 0.177201441 | 3.36646692  | 0.000761377 | 0.022960205 | pon1              | ZDB-GENE-040912-6    | pon1              |
| ENSDARG00000044808  | 56.61945404  | 0.595203524 | 1.510685686  | 0.661951066  | 0.15396604  | 3.865810426 | 0.00110721  | 0.005105372 | slc4a4b           | ZDB-GENE-091030-1    | slc4a4b           |
| ENSDARG00000040926  | 92.94232742  | 0.59513062  | 1.510609348  | 0.661984517  | 0.149499697 | 3.980814894 | 6.86794E-05 | 0.003424292 | nr2f2             | ZDB-GENE-990415-252  | nr2f2             |
| ENSDARG00000042859  | 46.74165926  | 0.592232329 | 1.507577668  | 0.663315742  | 0.209577399 | 2.825840629 | 0.004715672 | 0.085814968 | slc5a6a           | ZDB-GENE-041001-177  | slc5a6a           |
| ENSDARG00000013266  | 36.80926     | 0.591279003 | 1.506581796  | 0.663754203  | 0.209572378 | 2.821359415 | 0.004782059 | 0.086509662 | colec11           | ZDB-GENE-041114-11   | colec11           |
| ENSDARG00000031278  | 91.98251633  | 0.588854112 | 1.504051651  | 0.664870784  | 0.203797072 | 2.889413998 | 0.003859606 | 0.045199608 | si:ch73-193i2.2   | ZDB-GENE-141215-32   | si:ch73-193i2.2   |
| ENSDARG00000060889  | 22.61601308  | 0.586706371 | 1.501814234  | 0.665861315  | 0.189516427 | 3.095807473 | 0.001962778 | 0.045710357 | mettl7a           | ZDB-GENE-061027-239  | mettl7a           |
| ENSDARG00000099985  | 22.71455602  | 0.58548285  | 1.500541116  | 0.666426258  | 0.200613949 | 2.918455341 | 0.003517703 | 0.06973997  | ccn1l2            | ZDB-GENE-060404-5    | ccn1l2            |
| ENSDARG000000116139 | 343.1670094  | 0.584151853 | 1.49915739   | 0.667041371  | 0.164543914 | 3.550127364 | 0.000385045 | 0.013649431 | cdx1b             | ZDB-GENE-070615-29   | cdx1b             |
| ENSDARG00000053159  | 42.49322934  | 0.581979482 | 1.496901698  | 0.66804654   | 0.135068654 | 4.308767913 | 1.64167E-05 | 0.001041495 | zgc:110626        | ZDB-GENE-050417-447  | zgc:110626        |
| ENSDARG00000008553  | 136.2695422  | 0.581574218 | 1.496481266  | 0.668234226  | 0.170705691 | 3.406882428 | 0.000657094 | 0.020387522 | zgc:136872        | ZDB-GENE-060421-5204 | zgc:136872        |
| ENSDARG00000079560  | 335.0370807  | 0.580160122 | 1.495015168  | 0.668889535  | 0.18934027  | 3.064113727 | 0.002183159 | 0.049063019 | ptprh             | ZDB-GENE-091118-90   | ptprh             |
| ENSDARG00000028386  | 90.19842596  | 0.577422682 | 1.492181143  | 0.670159923  | 0.197638715 | 2.92160715  | 0.003482305 | 0.069262099 | htatip2           | ZDB-GENE-001219-1    | htatip2           |
| ENSDARG00000002285  | 47.86751444  | 0.573186981 | 1.487806578  | 0.67213038   | 0.149786072 | 3.826704125 | 0.00012987  | 0.005757124 | mcoln1a           | ZDB-GENE-040426-2704 | mcoln1a           |
| ENSDARG00000022698  | 190.8783921  | 0.568492222 | 1.482972887  | 0.674321162  | 0.181470671 | 3.132694764 | 0.001732095 | 0.042320157 | lad1              | ZDB-GENE-030616-268  | lad1              |
| ENSDARG00000100518  | 43.25512916  | 0.567556418 | 1.48201127   | 0.674758702  | 0.159969847 | 3.547896231 | 0.000388321 | 0.013739102 | CR387919.1        |                      |                   |
| ENSDARG00000001897  | 591.1384445  | 0.566639224 | 1.48106938   | 0.675187816  | 0.152675038 | 3.711407125 | 0.000206611 | 0.008279513 | man2b1            | ZDB-GENE-050327-52   | man2b1            |
| ENSDARG00000018485  | 73.00726489  | 0.565163559 | 1.479555238  | 0.675878787  | 0.133310408 | 4.239455618 | 2.24062E-05 | 0.00133841  | cyp2v1            | ZDB-GENE-040912-139  | cyp2v1            |
| ENSDARG00000044094  | 355.4338067  | 0.562833754 | 1.4771767835 | 0.6768971145 | 0.150034727 | 3.751356529 | 0.00017588  | 0.007370951 | gfpt2             | ZDB-GENE-071113-1    | gfpt2             |
| ENSDARG00000035610  | 23.97499552  | 0.560734247 | 1.475019725  | 0.677957036  | 0.181926444 | 3.082203091 | 0.002054746 | 0.047195027 | zgc:113208        | ZDB-GENE-050417-450  | zgc:113208        |
| ENSDARG00000079175  | 272.8376515  | 0.560676141 | 1.474960318  | 0.677984342  | 0.170175445 | 3.294694735 | 0.000985286 | 0.027675269 | si:ch211-79k12.1  | ZDB-GENE-080303-9    | si:ch211-79k12.1  |
| ENSDARG00000096214  | 35.14773329  | 0.560416656 | 1.474695053  | 0.678106296  | 0.16439135  | 3.409039806 | 0.00065192  | 0.020328844 | si:ch211-197k17.3 | ZDB-GENE-110914-193  | si:ch211-197k17.3 |
| ENSDARG00000055398  | 34.5095327   | 0.559909753 | 1.4741769988 | 0.678344596  | 0.196429677 | 2.850433605 | 0.004365966 | 0.081185559 | foxc1b            | ZDB-GENE-010302-2    | foxc1b            |
| ENSDARG00000103294  | 84.29951124  | 0.558481723 | 1.472718528  | 0.679016377  | 0.15819001  | 3.530448747 | 0.000414855 | 0.01445551  | si:ch211-221j21.3 | ZDB-GENE-030131-1805 | si:ch211-221j21.3 |
| ENSDARG00000070229  | 168.3636796  | 0.556479803 | 1.470676364  | 0.679959252  | 0.167571204 | 3.320855788 | 0.000897419 | 0.025922163 | zgc:158258        | ZDB-GENE-070112-2272 | zgc:158258        |
| ENSDARG00000078419  | 74.29537924  | 0.552062127 | 1.466179894  | 0.682044546  | 0.185178531 | 2.981242609 | 0.002870813 | 0.060293619 | filip1a           | ZDB-GENE-030131-4110 | filip1a           |

|                     |             |             |             |             |             |             |             |             |                   |                      |                   |
|---------------------|-------------|-------------|-------------|-------------|-------------|-------------|-------------|-------------|-------------------|----------------------|-------------------|
| ENSXDARG00000062517 | 37.08811653 | 0.550148375 | 1.464236279 | 0.682949886 | 0.195550215 | 2.813335565 | 0.004903046 | 0.087998956 | si:ch211-107n13.1 | ZDB-GENE-060503-190  | si:ch211-107n13.1 |
| ENSXDARG00000025797 | 110.2384164 | 0.548688111 | 1.462754961 | 0.683641503 | 0.168306754 | 3.260048082 | 0.001113933 | 0.030227352 | abhd2a            | ZDB-GENE-040426-784  | abhd2a            |
| ENSXDARG00000020054 | 120.587687  | 0.547012301 | 1.461056836 | 0.684436071 | 0.149635969 | 3.655620401 | 0.000256561 | 0.009874906 | aox6              | ZDB-GENE-050208-742  | aox6              |
| ENSXDARG00000019236 | 137.1185374 | 0.546541827 | 1.460580452 | 0.684659307 | 0.154431811 | 3.539049532 | 0.00040157  | 0.014126375 | gsr               | ZDB-GENE-050522-116  | gsr               |
| ENSXDARG00000040190 | 399.2388644 | 0.546278336 | 1.460313719 | 0.684784363 | 0.175192536 | 3.118159876 | 0.001819841 | 0.04378541  | qdpra             | ZDB-GENE-070705-197  | qdpra             |
| ENSXDARG00000093964 | 113.6790824 | 0.546014434 | 1.460046618 | 0.684909638 | 0.1591765   | 3.430245245 | 0.000603036 | 0.019194905 | si:ch211-250k18.6 | ZDB-GENE-070912-245  | si:ch211-250k18.6 |
| ENSXDARG00000101754 | 63.38771707 | 0.545928092 | 1.45995924  | 0.684950629 | 0.165535691 | 3.297947953 | 0.000973942 | 0.027440402 | BX664622.1        |                      |                   |
| ENSXDARG00000028048 | 27.28951367 | 0.543294547 | 1.457296612 | 0.686202103 | 0.161464104 | 3.364800805 | 0.000765989 | 0.023027243 | rdh8a             | ZDB-GENE-021115-3    | rdh8a             |
| ENSXDARG00000089507 | 57.5413604  | 0.543284731 | 1.457286696 | 0.686206772 | 0.188546013 | 2.881443757 | 0.003958579 | 0.075393304 | ugt1b5            | ZDB-GENE-080227-14   | ugt1b5            |
| ENSXDARG00000007494 | 57.28105875 | 0.542911917 | 1.456910161 | 0.686384121 | 0.155395386 | 3.493745423 | 0.000476295 | 0.016239889 | st3gal8           | ZDB-GENE-050417-286  | st3gal8           |
| ENSXDARG00000093024 | 190.8380221 | 0.542346273 | 1.456339054 | 0.686653288 | 0.155494689 | 3.487876507 | 0.000486873 | 0.01646597  | si:ch211-213a13.2 | ZDB-GENE-050208-551  | si:ch211-213a13.2 |
| ENSXDARG00000096110 | 75.26534518 | 0.540393031 | 1.454368674 | 0.687583566 | 0.18034829  | 2.996385671 | 0.002732007 | 0.058040944 | zgc:123278        | ZDB-GENE-051127-21   | zgc:123278        |
| ENSXDARG00000062756 | 72.853122   | 0.539371178 | 1.453338918 | 0.688070751 | 0.164262827 | 3.283586367 | 0.001024952 | 0.028442041 | BX571681.1        |                      |                   |
| ENSXDARG00000038703 | 238.1355849 | 0.539348134 | 1.453315704 | 0.688081741 | 0.189090273 | 2.852331452 | 0.004339982 | 0.081062935 | hkdc1             | ZDB-GENE-030131-9801 | hkdc1             |
| ENSXDARG00000052942 | 117.7639553 | 0.538882921 | 1.452847142 | 0.688303657 | 0.162765864 | 3.310785856 | 0.000930344 | 0.026578361 | aspg              | ZDB-GENE-070820-14   | aspg              |
| ENSXDARG00000032868 | 182.9064068 | 0.537757506 | 1.45171425  | 0.688840796 | 0.129377807 | 4.156489583 | 3.23175E-05 | 0.001823856 | pde4ba            | ZDB-GENE-030131-9570 | pde4ba            |
| ENSXDARG00000003165 | 56.34359944 | 0.537501238 | 1.451456402 | 0.688963167 | 0.166211528 | 3.233838497 | 0.001221385 | 0.032239658 | nr2f6b            | ZDB-GENE-040426-2351 | nr2f6b            |
| ENSXDARG00000028957 | 41.62352521 | 0.537257982 | 1.451211689 | 0.689079345 | 0.16057181  | 3.34590475  | 0.00020146  | 0.022929849 | maff              | ZDB-GENE-040426-1280 | maff              |
| ENSXDARG00000059001 | 52.09350591 | 0.535963883 | 1.449910535 | 0.689697727 | 0.174531217 | 3.070876912 | 0.002134311 | 0.048477848 | pim2              | ZDB-GENE-000831-6    | pim2              |
| ENSXDARG00000091548 | 82.99553458 | 0.53427978  | 1.448218997 | 0.690503302 | 0.172197117 | 3.102721991 | 0.001917497 | 0.04517043  | stard9            | ZDB-GENE-111111-11   | stard9            |
| ENSXDARG00000074223 | 28.48008339 | 0.534163287 | 1.448102062 | 0.690559061 | 0.187203637 | 2.85338093  | 0.004325673 | 0.080877785 | si:ch211-262n1.4  |                      |                   |
| ENSXDARG00000001833 | 42.59444399 | 0.53366998  | 1.447606991 | 0.690795227 | 0.162169192 | 3.290822214 | 0.00099895  | 0.027958282 | sv2               | ZDB-GENE-000607-80   | sv2               |
| ENSXDARG00000057125 | 168.9607557 | 0.533025383 | 1.446960344 | 0.691103944 | 0.154994794 | 3.43898894  | 0.000583891 | 0.018743671 | pld1b             | ZDB-GENE-070510-3    | pld1b             |
| ENSXDARG00000023053 | 48.14774702 | 0.528768075 | 1.442696743 | 0.693146363 | 0.153142224 | 3.452790882 | 0.000554819 | 0.018130655 | fam129ab          | ZDB-GENE-070912-688  | fam129ab          |
| ENSXDARG00000060004 | 75.07263095 | 0.528072166 | 1.442001001 | 0.693480795 | 0.134408661 | 3.92885519  | 8.53512E-05 | 0.004132346 | fzd7a             | ZDB-GENE-990415-223  | fzd7a             |
| ENSXDARG00000042824 | 753.8200954 | 0.524555594 | 1.438490401 | 0.695173217 | 0.103104903 | 5.087591162 | 3.6264E-07  | 3.74823E-05 | nfe2l2a           | ZDB-GENE-030123-2    | nfe2l2a           |
| ENSXDARG00000055381 | 78.9773755  | 0.524495448 | 1.438430432 | 0.695202199 | 0.140363806 | 3.736685858 | 0.000186462 | 0.007691752 | bambia            | ZDB-GENE-010416-1    | bambia            |
| ENSXDARG00000061918 | 44.44434144 | 0.52129606  | 1.435244035 | 0.696745623 | 0.156313949 | 3.334929894 | 0.000853209 | 0.024916413 | cplx2             | ZDB-GENE-081113-1    | cplx2             |
| ENSXDARG00000039754 | 53.08131982 | 0.519433552 | 1.433392342 | 0.697645697 | 0.17971294  | 2.890351429 | 0.003848114 | 0.074056064 | xpc               | ZDB-GENE-030131-8461 | xpc               |
| ENSXDARG00000063802 | 180.1093116 | 0.518712642 | 1.432676360 | 0.697994396 | 0.167022449 | 3.105646242 | 0.001898637 | 0.044840982 | cyp27a7           | ZDB-GENE-081104-519  | cyp27a7           |
| ENSXDARG00000001870 | 2691.299156 | 0.517656362 | 1.431627699 | 0.698505625 | 0.174550721 | 2.965650093 | 0.003020439 | 0.062368171 | atp1a1a.4         | ZDB-GENE-001212-4    | atp1a1a.4         |
| ENSXDARG00000099315 | 111.9160723 | 0.516721261 | 1.430700071 | 0.698958517 | 0.166299243 | 3.107177468 | 0.00188883  | 0.044724181 | nsdhl             | ZDB-GENE-050417-163  | nsdhl             |
| ENSXDARG00000013050 | 629.6744778 | 0.516703017 | 1.43068198  | 0.698967355 | 0.171941755 | 3.005104939 | 0.002654892 | 0.056747992 | abcc12            | ZDB-GENE-050517-25   | abcc12            |
| ENSXDARG00000076238 | 92.1028028  | 0.509370934 | 1.423409395 | 0.702528698 | 0.141763809 | 3.593095718 | 0.00326772  | 0.012048016 | gramd1c           | ZDB-GENE-051026-88   | gramd1c           |
| ENSXDARG00000010981 | 24.84638895 | 0.506737697 | 1.420833691 | 0.703812139 | 0.175036336 | 2.895042869 | 0.003791068 | 0.073197506 | zdhhc3a           | ZDB-GENE-040718-484  | zdhhc3a           |
| ENSXDARG00000061062 | 54.51913779 | 0.506719826 | 1.420816091 | 0.703820858 | 0.147381711 | 3.438145909 | 0.000585712 | 0.018743671 | nemp2             | ZDB-GENE-081104-413  | nemp2             |
| ENSXDARG00000098903 | 44.59199832 | 0.506378139 | 1.420479626 | 0.70398757  | 0.159684549 | 3.171115447 | 0.001518548 | 0.038535507 | tfe3a             | ZDB-GENE-010919-2    | tfe3a             |
| ENSXDARG00000076239 | 93.4469963  | 0.505750473 | 1.41986176  | 0.704293917 | 0.165599392 | 3.054059967 | 0.002257669 | 0.050164979 | si:ch211-74f19.2  | ZDB-GENE-160114-78   | si:ch211-74f19.2  |
| ENSXDARG00000074771 | 60.18632202 | 0.504534754 | 1.418665786 | 0.704887656 | 0.15083309  | 3.344987199 | 0.000822864 | 0.024229849 | ifngr1            | ZDB-GENE-081022-158  | ifngr1            |
| ENSXDARG00000043257 | 1250.704529 | 0.499571906 | 1.413793982 | 0.707316634 | 0.113983823 | 4.382831651 | 1.17147E-05 | 0.000769737 | ckbb              | ZDB-GENE-020103-2    | ckbb              |
| ENSXDARG00000075584 | 28.65955148 | 0.4987444   | 1.412983286 | 0.707722455 | 0.168143226 | 2.96618788  | 0.003015162 | 0.062368171 | itfg1             | ZDB-GENE-121003-3    | itfg1             |
| ENSXDARG00000067984 | 26.17107103 | 0.498200249 | 1.412450442 | 0.707989442 | 0.172637613 | 2.885815207 | 0.003904013 | 0.074818784 | gas1b             | ZDB-GENE-050302-79   | gas1b             |
| ENSXDARG00000054222 | 121.5195122 | 0.493248522 | 1.407610833 | 0.710423632 | 0.138501788 | 3.561315199 | 0.000369002 | 0.013233713 | fbxl8             | ZDB-GENE-051120-81   | fbxl8             |
| ENSXDARG00000045638 | 222.1448185 | 0.492412026 | 1.406794916 | 0.710835665 | 0.174309414 | 2.824930771 | 0.004729083 | 0.085889115 | slc13a1           | ZDB-GENE-031222-3    | slc13a1           |
| ENSXDARG00000033950 | 154.598721  | 0.49202105  | 1.40641372  | 0.711028331 | 0.136419314 | 3.606681742 | 0.000310138 | 0.011550431 | lamb2l            | ZDB-GENE-030131-4205 | lamb2l            |
| ENSXDARG00000055283 | 137.7034132 | 0.487673714 | 1.402182091 | 0.713174135 | 0.127323301 | 3.830200037 | 0.000128039 | 0.005699447 | id2a              | ZDB-GENE-020910-1    | id2a              |
| ENSXDARG00000031768 | 75.12804862 | 0.487539918 | 1.402052059 | 0.713240278 | 0.146389605 | 3.330427164 | 0.000867128 | 0.025165563 | roraa             | ZDB-GENE-060306-2    | roraa             |
| ENSXDARG00000025595 | 140.514125  | 0.486616966 | 1.401155395 | 0.713696713 | 0.134120226 | 3.628214643 | 0.000285388 | 0.010737357 | agmo              | ZDB-GENE-040426-2207 | agmo              |
| ENSXDARG00000007302 | 113.1051666 | 0.483784126 | 1.39840682  | 0.715099487 | 0.143477463 | 3.371847506 | 0.000746658 | 0.022668333 | sh3gl3b           | ZDB-GENE-040121-4    | sh3gl3b           |
| ENSXDARG00000018524 | 273.247774  | 0.481753123 | 1.39643955  | 0.716106902 | 0.156563013 | 3.077055771 | 0.002090562 | 0.047838503 | midn              | ZDB-GENE-030131-2433 | midn              |
| ENSXDARG00000068883 | 401.6755982 | 0.48175016  | 1.396436682 | 0.716108373 | 0.169791562 | 2.837303302 | 0.004549637 | 0.08345386  | tspan13a          | ZDB-GENE-040718-19   | tspan13a          |
| ENSXDARG00000086173 | 114.4139546 | 0.481173693 | 1.39587881  | 0.71639457  | 0.119263154 | 4.034554468 | 5.4706E-05  | 0.002819274 | relb              | ZDB-GENE-030131-9531 | relb              |
| ENSXDARG00000071662 | 43.3334218  | 0.481013225 | 1.395723559 | 0.716474257 | 0.170640776 | 2.818864498 | 0.004819386 | 0.08684335  | si:rp71-36a1.3    | ZDB-GENE-050208-566  | si:rp71-36a1.3    |
| ENSXDARG00000042141 | 53.26419799 | 0.480820431 | 1.395537054 | 0.71657001  | 0.162590959 | 2.95723965  | 0.003104068 | 0.063451755 | myo6b             | ZDB-GENE-030318-3    | myo6b             |

|                      |             |             |             |              |             |             |             |             |                   |                      |                   |
|----------------------|-------------|-------------|-------------|--------------|-------------|-------------|-------------|-------------|-------------------|----------------------|-------------------|
| ENS DARG00000032571  | 132.6613285 | 0.479872798 | 1.394620697 | 0.717040843  | 0.141967973 | 3.380148276 | 0.000724467 | 0.022067467 | il20ra            | ZDB-GENE-040724-249  | il20ra            |
| ENS DARG00000093931  | 30.02150898 | 0.477964553 | 1.392777259 | 0.717989896  | 0.169175075 | 2.825265797 | 0.004724141 | 0.085884136 | rflnb             | ZDB-GENE-090409-1    | rflnb             |
| ENS DARG00000079420  | 684.1721227 | 0.477594209 | 1.392419776 | 0.71817423   | 0.167835257 | 2.845613128 | 0.004432601 | 0.08187851  | dpp4              | ZDB-GENE-081104-277  | dpp4              |
| ENS DARG00000011961  | 35.7950569  | 0.474821097 | 1.389745872 | 0.719556014  | 0.154874175 | 3.065850701 | 0.002170517 | 0.048937703 | csrcp2            | ZDB-GENE-040426-1863 | csrcp2            |
| ENS DARG00000054823  | 104.09892   | 0.470010599 | 1.385119644 | 0.721959294  | 0.146643291 | 3.24944625  | 0.001156299 | 0.031056342 | id3               | ZDB-GENE-020515-1    | id3               |
| ENS DARG00000038615  | 30.31447759 | 0.468939256 | 1.384091439 | 0.722495618  | 0.162893646 | 2.87880631  | 0.003991834 | 0.071571316 | pip4p1a           | ZDB-GENE-051113-312  | pip4p1a           |
| ENS DARG00000092281  | 67.47202939 | 0.464900502 | 1.380222161 | 0.724521043  | 0.136882862 | 3.39633827  | 0.000682939 | 0.021081732 | flnb              | ZDB-GENE-041026-1    | flnb              |
| ENS DARG000000100149 | 85.26669563 | 0.464362116 | 1.379707184 | 0.724791471  | 0.126825069 | 3.661437925 | 0.000250804 | 0.009744055 | axin2             | ZDB-GENE-000403-2    | axin2             |
| ENS DARG00000099116  | 97.24771806 | 0.463595025 | 1.37897378  | 0.72517695   | 0.142627387 | 3.250392744 | 0.001152457 | 0.031043791 | nagk              | ZDB-GENE-070928-19   | nagk              |
| ENS DARG00000074282  | 413.5009772 | 0.462018502 | 1.377467712 | 0.72596983   | 0.149295558 | 3.094656712 | 0.001970408 | 0.045830048 | si:ch73-12o23.1   | ZDB-GENE-130530-749  | si:ch73-12o23.1   |
| ENS DARG00000013741  | 35.07141571 | 0.460288186 | 1.375816618 | 0.726841054  | 0.158102687 | 2.911324256 | 0.003599003 | 0.070591107 | lancl1            | ZDB-GENE-040924-1    | lancl1            |
| ENS DARG00000069339  | 95.97808603 | 0.460030137 | 1.375570553 | 0.726971073  | 0.132662307 | 3.467677799 | 0.000524976 | 0.017434141 | tbcd24            | ZDB-GENE-050809-65   | tbcd24            |
| ENS DARG00000053447  | 97.03507812 | 0.458647083 | 1.37425248  | 0.727668325  | 0.144144483 | 3.181856658 | 0.001463342 | 0.037601355 | ppp4r2b           | ZDB-GENE-030131-3008 | ppp4r2b           |
| ENS DARG00000074686  | 121.7381421 | 0.458196921 | 1.373823741 | 0.723895413  | 0.140284278 | 3.266202937 | 0.001090001 | 0.029690365 | oga               | ZDB-GENE-030131-3208 | oga               |
| ENS DARG00000012574  | 69.56197194 | 0.457941822 | 1.373580842 | 0.728024132  | 0.156725427 | 2.921936996 | 0.003478619 | 0.069262099 | slkb              | ZDB-GENE-030131-1684 | slkb              |
| ENS DARG00000045277  | 84.75115779 | 0.457505785 | 1.373165756 | 0.728244202  | 0.161381269 | 2.834937345 | 0.004583467 | 0.083977142 | rdh12l            | ZDB-GENE-040801-48   | rdh12l            |
| ENS DARG00000061472  | 185.8334484 | 0.455867003 | 1.371606839 | 0.729071897  | 0.138195245 | 3.298716983 | 0.000971278 | 0.027440402 | gba2              | ZDB-GENE-070522-3    | gba2              |
| ENS DARG00000077751  | 59.7756294  | 0.451777704 | 1.367724543 | 0.7311741373 | 0.13306631  | 3.395132134 | 0.000685955 | 0.021139359 | zbtb47a           | ZDB-GENE-081104-121  | zbtb47a           |
| ENS DARG00000021242  | 847.8525474 | 0.450336087 | 1.366358524 | 0.731872333  | 0.143513485 | 3.137935697 | 0.001701422 | 0.041736674 | mvp               | ZDB-GENE-030826-33   | mvp               |
| ENS DARG00000077298  | 98.89225758 | 0.450109488 | 1.366143931 | 0.731987294  | 0.111345975 | 4.042440597 | 5.28977E-05 | 0.002749187 | gas1a             | ZDB-GENE-050302-155  | gas1a             |
| ENS DARG00000012776  | 75.27108668 | 0.448617695 | 1.364732025 | 0.732744584  | 0.143839534 | 3.118876173 | 0.001815422 | 0.043774759 | smarca1           | ZDB-GENE-070705-296  | smarca1           |
| ENS DARG00000073711  | 69.4915346  | 0.447811183 | 1.363969309 | 0.733194326  | 0.140280513 | 3.726154686 | 0.001944423 | 0.007931256 | zgc:77486         | ZDB-GENE-040426-2056 | zgc:77486         |
| ENS DARG00000018757  | 107.6757748 | 0.447699439 | 1.363863668 | 0.733211115  | 0.159719315 | 2.803038813 | 0.005062358 | 0.089987687 | klf5l             | ZDB-GENE-060312-34   | klf5l             |
| ENS DARG00000002336  | 147.9573465 | 0.445730768 | 1.362003837 | 0.734212322  | 0.137625753 | 3.238716295 | 0.001200689 | 0.031876312 | dlc               | ZDB-GENE-000125-4    | dlc               |
| ENS DARG00000008029  | 1145.093064 | 0.445578009 | 1.36185963  | 0.734290068  | 0.161069096 | 2.766378033 | 0.005668278 | 0.098696616 | mep1a.2           | ZDB-GENE-041001-208  | mep1a.2           |
| ENS DARG00000097496  | 56.04711334 | 0.445347851 | 1.361642385 | 0.734407221  | 0.131686159 | 3.381888079 | 0.000719895 | 0.021964548 | si:dkey-6e2.2     | ZDB-GENE-131121-72   | si:dkey-6e2.2     |
| ENS DARG00000038754  | 86.26769169 | 0.445212269 | 1.361514427 | 0.734476242  | 0.1510887   | 2.946694689 | 0.003211902 | 0.065420014 | plk3              | ZDB-GENE-030131-6134 | plk3              |
| ENS DARG00000062390  | 114.7583094 | 0.4423631   | 1.358828234 | 0.735928188  | 0.099245488 | 4.45726159  | 8.30133E-06 | 0.000565659 | cdc42ep5          | ZDB-GENE-030131-5813 | cdc42ep5          |
| ENS DARG00000042946  | 133.4456675 | 0.440066292 | 1.356666665 | 0.737100738  | 0.113143287 | 3.88946003  | 0.000100468 | 0.004715309 | hook1             | ZDB-GENE-041001-159  | hook1             |
| ENS DARG00000016623  | 98.8313342  | 0.439837768 | 1.356451785 | 0.737217504  | 0.143034118 | 3.07505491  | 0.002104638 | 0.047981574 | si:ch211-195b13.1 | ZDB-GENE-030131-7626 | si:ch211-195b13.1 |
| ENS DARG00000043923  | 103.9128459 | 0.438103464 | 1.354822136 | 0.738104267  | 0.126057938 | 3.475413527 | 0.000510066 | 0.017048214 | sox9b             | ZDB-GENE-001103-2    | sox9b             |
| ENS DARG00000078887  | 173.8782336 | 0.436759943 | 1.353561035 | 0.738791953  | 0.1496516   | 2.918511681 | 0.003517067 | 0.06973997  | atp10d            | ZDB-GENE-090313-231  | atp10d            |
| ENS DARG00000026137  | 73.78030629 | 0.432678266 | 1.349736948 | 0.740885105  | 0.142558363 | 3.035095646 | 0.002404594 | 0.052416734 | sfxn5b            | ZDB-GENE-050706-107  | sfxn5b            |
| ENS DARG000000086740 | 692.5823999 | 0.43051886  | 1.347718192 | 0.741994881  | 0.125598616 | 3.427735716 | 0.000608638 | 0.019240061 | phyh              | ZDB-GENE-050417-361  | phyh              |
| ENS DARG00000063511  | 127.9474893 | 0.428762451 | 1.346078411 | 0.742898773  | 0.142433519 | 3.01026369  | 0.00261021  | 0.056166829 | si:ch211-15d5.11  | ZDB-GENE-131121-177  | si:ch211-15d5.11  |
| ENS DARG00000060977  | 65.95056277 | 0.427640255 | 1.345031775 | 0.74347686   | 0.131978698 | 3.240221796 | 0.001194368 | 0.031800253 | zgc:153018        | ZDB-GENE-060929-752  | zgc:153018        |
| ENS DARG00000029242  | 41.45525739 | 0.425845693 | 1.343359735 | 0.744402243  | 0.154243183 | 2.760872051 | 0.005764726 | 0.099585406 | fbxo3             | ZDB-GENE-050522-269  | fbxo3             |
| ENS DARG00000053459  | 68.1157348  | 0.424120828 | 1.341754595 | 0.745292771  | 0.146923108 | 2.886685663 | 0.00389323  | 0.047889272 | rypbp             | ZDB-GENE-061103-96   | rypbp             |
| ENS DARG00000006120  | 107.7753953 | 0.421235531 | 1.339073853 | 0.7467848    | 0.130317557 | 3.232377432 | 0.001227648 | 0.032358547 | tbx2b             | ZDB-GENE-990726-27   | tbx2b             |
| ENS DARG00000102308  | 72.60954828 | 0.417705194 | 1.335801088 | 0.748614453  | 0.118309133 | 3.530625105 | 0.000414579 | 0.01445551  | ttc39c            | ZDB-GENE-050522-194  | ttc39c            |
| ENS DARG00000099175  | 444.9950011 | 0.415904693 | 1.334135032 | 0.749549316  | 0.092780537 | 4.482671769 | 7.37143E-06 | 0.000511772 | hmgb1a            | ZDB-GENE-030131-341  | hmgb1a            |
| ENS DARG00000016357  | 160.0477923 | 0.413114482 | 1.331557272 | 0.751000367  | 0.143698234 | 2.874875148 | 0.004041873 | 0.076504504 | fmo5              | ZDB-GENE-030131-6606 | fmo5              |
| ENS DARG00000042620  | 1601.330862 | 0.411779349 | 1.330325561 | 0.751695697  | 0.118170426 | 3.484622707 | 0.000492831 | 0.016545826 | gstr              | ZDB-GENE-090507-1    | gstr              |
| ENS DARG00000055502  | 205.8998881 | 0.411222234 | 1.329811938 | 0.75198603   | 0.100356387 | 4.09761897  | 4.17422E-05 | 0.002232478 | cicb              | ZDB-GENE-030131-1966 | cicb              |
| ENS DARG00000070513  | 63.87117232 | 0.409441197 | 1.32817127  | 0.752914946  | 0.124140942 | 3.298196322 | 0.000973081 | 0.027440402 | brpf3a            | ZDB-GENE-130530-730  | brpf3a            |
| ENS DARG00000009594  | 404.0589549 | 0.409151904 | 1.327904969 | 0.753065937  | 0.126710747 | 3.229022903 | 0.001242139 | 0.032693679 | nr1d2b            | ZDB-GENE-990415-244  | nr1d2b            |
| ENS DARG000000104242 | 60.860799   | 0.408865795 | 1.327641165 | 0.753215297  | 0.142584795 | 2.867527319 | 0.00436931  | 0.021323368 | dcp2              | ZDB-GENE-040426-851  | dcp2              |
| ENS DARG00000089043  | 139.0257451 | 0.4086621   | 1.327454213 | 0.753321651  | 0.133175993 | 3.068586849 | 0.002150738 | 0.048730638 | ptpn6             | ZDB-GENE-030131-7513 | ptpn6             |
| ENS DARG00000055722  | 149.6852118 | 0.40824037  | 1.327066227 | 0.753541895  | 0.122017595 | 3.345750015 | 0.000820603 | 0.024229849 | bco2a             | ZDB-GENE-030131-8039 | bco2a             |
| ENS DARG00000059906  | 223.710644  | 0.407950567 | 1.326799678 | 0.753693279  | 0.106185151 | 3.84187963  | 0.000122096 | 0.005519206 | sdca              | ZDB-GENE-061111-1    | sdca              |
| ENS DARG00000097863  | 38.8549584  | 0.407549299 | 1.326430696 | 0.753902939  | 0.144507593 | 2.820262188 | 0.004798443 | 0.086720772 | si:dkeyp-84f3.9   | ZDB-GENE-131127-66   | si:dkeyp-84f3.9   |
| ENS DARG00000092158  | 101.7062686 | 0.405313015 | 1.324376223 | 0.75507245   | 0.120912898 | 3.352107367 | 0.000801989 | 0.023875397 | cbx3b             | ZDB-GENE-070628-2    | cbx3b             |
| ENS DARG00000012140  | 117.3865113 | 0.400960063 | 1.320386289 | 0.757354123  | 0.117691647 | 3.406869321 | 0.000657126 | 0.020387522 | ccn1b             | ZDB-GENE-030131-4813 | ccn1b             |
| ENS DARG00000075608  | 53.70444602 | 0.400096065 | 1.319595776 | 0.757807821  | 0.139382119 | 2.870497786 | 0.004098261 | 0.077333128 | mical2a           | ZDB-GENE-110110-2    | mical2a           |

|                    |             |              |             |             |             |              |             |             |                  |                      |                  |
|--------------------|-------------|--------------|-------------|-------------|-------------|--------------|-------------|-------------|------------------|----------------------|------------------|
| ENSDARG00000035569 | 129.6478331 | 0.397931488  | 1.317617378 | 0.758945667 | 0.143035534 | 2.78204637   | 0.005401732 | 0.094919836 | cyp1d1           | ZDB-GENE-041114-179  | cyp1d1           |
| ENSDARG00000014333 | 93.24453271 | 0.39657336   | 1.316377579 | 0.759660462 | 0.128286505 | 3.091310029  | 0.001992754 | 0.04623291  | ormdl1           | ZDB-GENE-030616-529  | ormdl1           |
| ENSDARG00000071570 | 38.15592324 | 0.396521596  | 1.316330349 | 0.759687719 | 0.143366489 | 2.76578996   | 0.00567851  | 0.098696616 | si:dkeyp-87e7.4  | ZDB-GENE-030131-6208 | si:dkeyp-87e7.4  |
| ENSDARG00000088835 | 71.9143592  | 0.394415404  | 1.314410039 | 0.760797598 | 0.121075912 | 3.257587732  | 0.001123635 | 0.030424395 | efs              | ZDB-GENE-030131-1658 | efs              |
| ENSDARG00000103683 | 164.9015826 | 0.389030732  | 1.309513317 | 0.763642482 | 0.115901162 | 3.35657319   | 0.000789148 | 0.023607725 | inpp5b           | ZDB-GENE-110411-228  | inpp5b           |
| ENSDARG00000062489 | 101.48869   | 0.388044032  | 1.308618011 | 0.764164937 | 0.130854161 | 2.926775176  | 0.003424964 | 0.068491828 | march8           | ZDB-GENE-080204-8    | march8           |
| ENSDARG00000063229 | 158.5396273 | 0.386967943  | 1.307642292 | 0.764735132 | 0.133509372 | 2.898432792  | 0.003750327 | 0.07278324  | xpo1b            | ZDB-GENE-070530-6    | xpo1b            |
| ENSDARG00000070625 | 71.76494254 | 0.379378618  | 1.300781477 | 0.768768635 | 0.133104048 | 2.850241036  | 0.004368611 | 0.081185559 | enpp5            | ZDB-GENE-041014-10   | enpp5            |
| ENSDARG00000075014 | 214.5040443 | 0.379210806  | 1.30063018  | 0.768858062 | 0.110405979 | 3.434694476  | 0.000593222 | 0.018948095 | sqstm1           | ZDB-GENE-040426-2204 | sqstm1           |
| ENSDARG00000034080 | 131.6774956 | 0.378601966  | 1.300081409 | 0.769182601 | 0.11764538  | 3.218162644  | 0.001290146 | 0.03376403  | plcd1b           | ZDB-GENE-030131-9435 | plcd1b           |
| ENSDARG00000078772 | 141.7883888 | 0.37821285   | 1.299730806 | 0.769390089 | 0.10242073  | 3.692737284  | 0.000221853 | 0.00879667  | nbr1b            | ZDB-GENE-170215-1    | nbr1b            |
| ENSDARG00000063375 | 117.2170949 | 0.374163992  | 1.296088284 | 0.77155238  | 0.124446036 | 3.00663649   | 0.002641554 | 0.056576621 | pter             | ZDB-GENE-060825-190  | pter             |
| ENSDARG00000017624 | 6756.660011 | 0.366929033  | 1.289604812 | 0.77543135  | 0.100440106 | 3.653212314  | 0.00025898  | 0.009905847 | krt4             | ZDB-GENE-000607-83   | krt4             |
| ENSDARG00000041951 | 78.66074051 | 0.36356449   | 1.2866008   | 0.777241861 | 0.131056648 | 2.774101865  | 0.005535434 | 0.096899067 | selenoo1         | ZDB-GENE-030131-4485 | selenoo1         |
| ENSDARG00000037781 | 162.1277429 | 0.362937607  | 1.286041864 | 0.777579664 | 0.094857703 | 3.826126886  | 0.000130175 | 0.005757124 | acss2            | ZDB-GENE-040718-388  | acss2            |
| ENSDARG00000020926 | 231.299493  | 0.3620279    | 1.285231192 | 0.778070129 | 0.127221868 | 2.845642071  | 0.004432198 | 0.08187851  | creb3l3l         | ZDB-GENE-040426-2942 | creb3l3l         |
| ENSDARG00000076847 | 363.1847081 | 0.361516452  | 1.284775647 | 0.778346011 | 0.128272064 | 2.818356873  | 0.004827013 | 0.086895673 | tnrc6c1          | ZDB-GENE-030131-7440 | tnrc6c1          |
| ENSDARG00000022650 | 160.6772232 | 0.358043437  | 1.281686513 | 0.780221989 | 0.11331575  | 3.159697005  | 0.001579333 | 0.03947903  | cyp2ad3          | ZDB-GENE-041001-156  | cyp2ad3          |
| ENSDARG00000022280 | 300.5854786 | 0.358038191  | 1.281681853 | 0.780224826 | 0.08118178  | 4.410326938  | 1.03215E-05 | 0.000688023 | brd2a            | ZDB-GENE-990415-248  | brd2a            |
| ENSDARG00000013968 | 1988.689253 | 0.356243638  | 1.280088573 | 0.781195943 | 0.088588981 | 4.021308688  | 5.78757E-05 | 0.00295777  | psap             | ZDB-GENE-020108-1    | psap             |
| ENSDARG00000062096 | 179.9229733 | 0.347262683  | 1.272144616 | 0.786074152 | 0.116853199 | 2.971785853  | 0.002960731 | 0.06161938  | pm20d1.2         | ZDB-GENE-061013-637  | pm20d1.2         |
| ENSDARG00000099399 | 267.4575603 | 0.346247744  | 1.271249974 | 0.786627352 | 0.113475161 | 3.051308682  | 0.00278462  | 0.050504993 | micu2            | ZDB-GENE-030131-3374 | micu2            |
| ENSDARG00000061841 | 78.10861133 | 0.344600525  | 1.269799332 | 0.787526009 | 0.115148747 | 2.992655446  | 0.002765618 | 0.058497689 | tiparp           | ZDB-GENE-031002-47   | tiparp           |
| ENSDARG00000074245 | 214.028542  | 0.34098739   | 1.266623183 | 0.789500787 | 0.115829844 | 2.943864717  | 0.003241417 | 0.065822937 | spen             | ZDB-GENE-050309-70   | spen             |
| ENSDARG00000079104 | 53.51861546 | 0.33612259   | 1.262359294 | 0.792167495 | 0.120807275 | 2.782304214  | 0.005397442 | 0.094919836 | mfhas1           | ZDB-GENE-080917-20   | mfhas1           |
| ENSDARG00000071868 | 73.81933761 | 0.332851136  | 1.259500012 | 0.793965852 | 0.118963301 | 2.797931247  | 0.005143106 | 0.091158827 | znf711           | ZDB-GENE-081107-49   | znf711           |
| ENSDARG00000053291 | 1170.507551 | 0.329125649  | 1.256251787 | 0.796018768 | 0.100678544 | 3.269074374  | 0.001078999 | 0.029584844 | pncr2            | ZDB-GENE-030131-5475 | pncr2            |
| ENSDARG00000013095 | 167.1876694 | 0.328412587  | 1.25563103  | 0.796412303 | 0.105548991 | 3.111470637  | 0.00186158  | 0.04442198  | gclcl            | ZDB-GENE-030131-5056 | gclcl            |
| ENSDARG00000017320 | 178.4485525 | 0.324108973  | 1.251891016 | 0.798791578 | 0.104659802 | 3.096785649  | 0.001956313 | 0.045675435 | f11r.1           | ZDB-GENE-030131-2416 | f11r.1           |
| ENSDARG0000009688  | 623.2508451 | 0.318751756  | 1.247250939 | 0.801763277 | 0.091969394 | 3.46584598   | 0.000528566 | 0.01749021  | tnrc6a           | ZDB-GENE-030131-2519 | tnrc6a           |
| ENSDARG00000015449 | 169.6173559 | 0.317875916  | 1.246493981 | 0.802250163 | 0.100013701 | 3.178323698  | 0.001481293 | 0.037851144 | fut8a            | ZDB-GENE-031118-20   | fut8a            |
| ENSDARG00000097017 | 103.1399148 | 0.315800716  | 1.244702289 | 0.803404966 | 0.104399551 | 3.024924086  | 0.002486955 | 0.053956375 | mical3a          | ZDB-GENE-050126-2    | mical3a          |
| ENSDARG00000042751 | 183.6461862 | 0.315099354  | 1.244097328 | 0.803795634 | 0.102864109 | 3.063258483  | 0.002189409 | 0.049063019 | riok3            | ZDB-GENE-040801-133  | riok3            |
| ENSDARG0000004830  | 155.1315207 | 0.306845924  | 1.237000363 | 0.8084072   | 0.090695377 | 3.383258724  | 0.000716311 | 0.021927941 | flot2a           | ZDB-GENE-020430-3    | flot2a           |
| ENSDARG00000017115 | 96.68956891 | 0.306583537  | 1.236775407 | 0.808554241 | 0.103569734 | 2.960165333  | 0.00307474  | 0.063135116 | kctd10           | ZDB-GENE-040426-2843 | kctd10           |
| ENSDARG00000001910 | 266.1563054 | 0.303338003  | 1.233996244 | 0.810375238 | 0.106837918 | 2.839235457  | 0.004522177 | 0.083282303 | rorab            | ZDB-GENE-040426-855  | rorab            |
| ENSDARG00000055837 | 304.9824387 | 0.295542454  | 1.227346373 | 0.814765923 | 0.083863587 | 3.524085537  | 0.000424947 | 0.014723495 | arhgef1b         | ZDB-GENE-060616-136  | arhgef1b         |
| ENSDARG00000016573 | 195.9388618 | 0.28306253   | 1.216775095 | 0.821844566 | 0.088953389 | 3.182144412  | 0.001461889 | 0.037601355 | mroh1            | ZDB-GENE-090806-2    | mroh1            |
| ENSDARG00000062137 | 96.27542288 | 0.281924219  | 1.215815418 | 0.822493271 | 0.097815292 | 2.882210051  | 0.003948964 | 0.075290747 | stag1b           | ZDB-GENE-030131-1393 | stag1b           |
| ENSDARG0000009214  | 135.6056974 | 0.276576149  | 1.211316734 | 0.825547911 | 0.099582278 | 2.777363144  | 0.005480191 | 0.096114928 | mfsd13a          | ZDB-GENE-041212-83   | mfsd13a          |
| ENSDARG00000099614 | 169.3642868 | 0.275230554  | 1.210187472 | 0.826318255 | 0.096519984 | 2.851539587  | 0.004350807 | 0.081182702 | purab            | ZDB-GENE-141216-78   | purab            |
| ENSDARG00000016016 | 317.3360226 | 0.263151776  | 1.20090763  | 0.83326554  | 0.088230578 | 2.982546219  | 0.002858615 | 0.060106052 | dbnlb            | ZDB-GENE-050522-293  | dbnlb            |
| ENSDARG00000089302 | 185.4494855 | 0.259424665  | 1.197001255 | 0.835421012 | 0.092186643 | 2.814124226  | 0.004891032 | 0.087876185 | hmrnpa0a         | ZDB-GENE-030131-2249 | hmrnpa0a         |
| ENSDARG00000096457 | 133.6601791 | 0.258647862  | 1.196356917 | 0.835870956 | 0.090855188 | 2.846814448  | 0.004415909 | 0.081816616 | si:dkey-118j18.2 | ZDB-GENE-030131-8692 | si:dkey-118j18.2 |
| ENSDARG00000037998 | 348.7839763 | 0.250129756  | 1.189314077 | 0.840820788 | 0.065898562 | 3.795678532  | 0.00014724  | 0.006388974 | flot1b           | ZDB-GENE-020430-2    | flot1b           |
| ENSDARG0000004588  | 175.0406777 | 0.242528847  | 1.183064595 | 0.845262384 | 0.084273923 | 2.877863515  | 0.004003783 | 0.07586159  | sox4a            | ZDB-GENE-030131-8290 | sox4a            |
| ENSDARG00000027734 | 240.2951308 | 0.240126822  | 1.181096483 | 0.846670881 | 0.077031289 | 3.117236351  | 0.001328584 | 0.04378541  | srsf5b           | ZDB-GENE-040718-354  | srsf5b           |
| ENSDARG00000099999 | 198.204042  | 0.235770319  | 1.177535308 | 0.849231436 | 0.076757391 | 3.071630173  | 0.002128933 | 0.048475386 | tcf3b            | ZDB-GENE-051113-64   | tcf3b            |
| ENSDARG00000001015 | 137.3748048 | 0.233488057  | 1.175673987 | 0.850575935 | 0.08344037  | 2.798262477  | 0.005137834 | 0.091153205 | znf384l          | ZDB-GENE-030616-498  | znf384l          |
| ENSDARG00000052244 | 402.8425494 | 0.220400616  | 1.165057061 | 0.858327058 | 0.071349233 | 3.089039734  | 0.002008046 | 0.046412094 | zgc:158564       | ZDB-GENE-070112-1662 | zgc:158564       |
| ENSDARG00000027383 | 480.4186005 | 0.218586128  | 1.163592681 | 0.859607262 | 0.06732966  | 3.261361623  | 0.001108785 | 0.030132102 | anxa11a          | ZDB-GENE-030707-4    | anxa11a          |
| ENSDARG00000024844 | 278.4427977 | -0.205968093 | 0.866956737 | 1.153460094 | 0.071101118 | -2.896833386 | 0.003769499 | 0.073078231 | max              | ZDB-GENE-990415-152  | max              |
| ENSDARG00000021309 | 356.2814921 | -0.211613216 | 0.86357105  | 1.157982311 | 0.072740711 | -2.909144186 | 0.003624197 | 0.071009554 | rhoca            | ZDB-GENE-040426-1337 | rhoca            |
| ENSDARG00000025535 | 271.9374489 | -0.216834156 | 0.860451537 | 1.162180502 | 0.076803136 | -2.823246111 | 0.004754006 | 0.086171632 | clint1a          | ZDB-GENE-030131-2590 | clint1a          |



|                     |             |              |             |             |             |              |             |             |           |                      |           |
|---------------------|-------------|--------------|-------------|-------------|-------------|--------------|-------------|-------------|-----------|----------------------|-----------|
| ENSDARG00000052975  | 487.7957303 | -0.256545991 | 0.837089629 | 1.194615207 | 0.080686759 | -3.179530268 | 0.00147514  | 0.037746341 | ubqln4    | ZDB-GENE-030131-6269 | ubqln4    |
| ENSDARG00000007294  | 1362.934794 | -0.257983873 | 0.836255748 | 1.19580643  | 0.091804988 | -2.810129157 | 0.004952162 | 0.088370399 | aco2      | ZDB-GENE-030131-1390 | aco2      |
| ENSDARG00000035741  | 423.1230525 | -0.266232394 | 0.831488149 | 1.202662962 | 0.093655547 | -2.842676206 | 0.004473649 | 0.082471144 | slc25a11  | ZDB-GENE-040625-79   | slc25a11  |
| ENSDARG00000038910  | 230.7694175 | -0.278467384 | 0.824466406 | 1.212905696 | 0.098991336 | -2.81304805  | 0.004907432 | 0.087998956 | pccb      | ZDB-GENE-040426-2467 | pccb      |
| ENSDARG00000022788  | 95.5545539  | -0.289436888 | 0.818221364 | 1.222163151 | 0.096438326 | -3.001264128 | 0.002688612 | 0.057251264 | cops7a    | ZDB-GENE-030131-8680 | cops7a    |
| ENSDARG00000063912  | 29288.28351 | -0.290130562 | 0.817828043 | 1.22275093  | 0.093770921 | -3.094035526 | 0.001974538 | 0.045868128 | mt-co3    | ZDB-GENE-011205-16   | mt-co3    |
| ENSDARG00000038075  | 604.1507015 | -0.291525874 | 0.817037458 | 1.223934094 | 0.093312487 | -3.124189291 | 0.001782957 | 0.043161639 | cyc1      | ZDB-GENE-031105-2    | cyc1      |
| ENSDARG00000058953  | 384.7915252 | -0.296358649 | 0.814305105 | 1.228040933 | 0.104661256 | -2.831598445 | 0.004631597 | 0.08461979  | abcc4     | ZDB-GENE-030616-511  | abcc4     |
| ENSDARG00000054191  | 1571.583033 | -0.301459126 | 0.811431308 | 1.232390209 | 0.089138366 | -3.381923406 | 0.000719802 | 0.021964548 | pgk1      | ZDB-GENE-040426-2711 | pgk1      |
| ENSDARG00000003699  | 145.6960211 | -0.301556788 | 0.811376381 | 1.232473638 | 0.103903106 | -2.902288487 | 0.003704472 | 0.072045328 | atp7a     | ZDB-GENE-060825-45   | atp7a     |
| ENSDARG00000059925  | 230.2661123 | -0.303525745 | 0.810269789 | 1.234156837 | 0.104128588 | -2.914912702 | 0.00355788  | 0.070150598 | usp24     | ZDB-GENE-030131-4356 | usp24     |
| ENSDARG00000055092  | 132.8066616 | -0.307080146 | 0.808275965 | 1.237201207 | 0.097158069 | -3.160624212 | 0.001574315 | 0.03947903  | pora      | ZDB-GENE-050809-121  | pora      |
| ENSDARG00000015374  | 86.35663175 | -0.307543706 | 0.808016296 | 1.237598803 | 0.104384364 | -2.946262211 | 0.003216396 | 0.065420014 | st3gal3a  | ZDB-GENE-040426-1322 | st3gal3a  |
| ENSDARG00000042252  | 193.3645255 | -0.307558468 | 0.808008028 | 1.237611466 | 0.098657947 | -3.117422133 | 0.001824401 | 0.04478541  | eif4h     | ZDB-GENE-010328-19   | eif4h     |
| ENSDARG00000054849  | 122.2353631 | -0.310722118 | 0.806238109 | 1.240328371 | 0.100541728 | -3.09047918  | 0.001998338 | 0.04629177  | bcat2     | ZDB-GENE-040718-425  | bcat2     |
| ENSDARG00000015918  | 425.3102712 | -0.313200958 | 0.804854019 | 1.242461337 | 0.104131509 | -3.007744363 | 0.002631944 | 0.056449688 | dlat      | ZDB-GENE-030131-2921 | dlat      |
| ENSDARG00000033443  | 89.65560614 | -0.31607369  | 0.803252967 | 1.244937822 | 0.101036452 | -3.128313434 | 0.001758126 | 0.042735141 | mdm2      | ZDB-GENE-990415-153  | mdm2      |
| ENSDARG00000057719  | 160.2508839 | -0.319269591 | 0.801475547 | 1.247698703 | 0.115134255 | -2.773020485 | 0.00553862  | 0.097037    | at12      | ZDB-GENE-030131-6505 | at12      |
| ENSDARG00000079504  | 348.5078525 | -0.321766739 | 0.80008948  | 1.249860203 | 0.111752875 | -2.879270341 | 0.003985965 | 0.07571316  | mfn2      | ZDB-GENE-081105-44   | mfn2      |
| ENSDARG00000067805  | 222.5567342 | -0.322442627 | 0.799714734 | 1.250445887 | 0.112265535 | -2.872142611 | 0.004076989 | 0.077010729 | ggcx      | ZDB-GENE-030826-27   | ggcx      |
| ENSDARG00000006251  | 407.7074962 | -0.32614982  | 0.797662401 | 1.253663203 | 0.103212693 | -3.159977802 | 0.001577812 | 0.03947903  | ell2      | ZDB-GENE-030131-1717 | ell2      |
| ENSDARG00000067736  | 92.92243022 | -0.328166943 | 0.796547917 | 1.255417255 | 0.105563609 | -3.108712811 | 0.001879043 | 0.044607261 | ano10a    | ZDB-GENE-050913-43   | ano10a    |
| ENSDARG00000058693  | 1360.92534  | -0.331360755 | 0.794786485 | 1.258199553 | 0.090427718 | -3.664371508 | 0.000247947 | 0.009685187 | cast      | ZDB-GENE-050810-2    | cast      |
| ENSDARG00000043970  | 335.7961559 | -0.332982192 | 0.79389373  | 1.259614432 | 0.112182251 | -2.968225276 | 0.002995247 | 0.062126897 | lrpprc    | ZDB-GENE-030131-7887 | lrpprc    |
| ENSDARG00000074168  | 280.8661395 | -0.33358332  | 0.793563007 | 1.260139385 | 0.08934229  | -3.733767293 | 0.000188637 | 0.007764071 | tasor2    | ZDB-GENE-041111-225  | tasor2    |
| ENSDARG00000061952  | 167.3007391 | -0.334446122 | 0.79308856  | 1.260893235 | 0.101539611 | -3.293750261 | 0.000988603 | 0.02726092  | ecpas     | ZDB-GENE-061207-66   | ecpas     |
| ENSDARG00000058348  | 350.0905933 | -0.336522997 | 0.791947667 | 1.262709699 | 0.106655914 | -3.15522116  | 0.001603765 | 0.039981119 | scin1b    | ZDB-GENE-040426-2068 | scin1b    |
| ENSDARG00000022372  | 967.9206749 | -0.336788414 | 0.791801983 | 1.262942025 | 0.119882477 | -2.809321444 | 0.004964605 | 0.088506591 | kng1      | ZDB-GENE-041010-56   | kng1      |
| ENSDARG00000045516  | 2079.586688 | -0.339824564 | 0.790137389 | 1.265602684 | 0.120890938 | -2.81100114  | 0.004938761 | 0.08834142  | itih2     | ZDB-GENE-040426-1942 | itih2     |
| ENSDARG000000063031 | 103.9649525 | -0.341737428 | 0.789090443 | 1.267281854 | 0.111812133 | -3.056353715 | 0.002240468 | 0.049963789 | rad54l2   | ZDB-GENE-030131-3097 | rad54l2   |
| ENSDARG00000010113  | 393.5168645 | -0.342859098 | 0.788477177 | 1.268267527 | 0.115475207 | -2.969114398 | 0.002986594 | 0.06201733  | ndufb8    | ZDB-GENE-040426-1858 | ndufb8    |
| ENSDARG00000040988  | 1388.061511 | -0.346612346 | 0.786428578 | 1.271571288 | 0.102814705 | -3.371233207 | 0.000748325 | 0.022674496 | tpi1b     | ZDB-GENE-020416-4    | tpi1b     |
| ENSDARG00000052330  | 154.344584  | -0.348561759 | 0.78536665  | 1.273290635 | 0.114115615 | -3.054461548 | 0.002254649 | 0.050158446 | slc4a2b   | ZDB-GENE-030429-14   | slc4a2b   |
| ENSDARG00000021208  | 794.9048793 | -0.361907312 | 0.778135167 | 1.28512377  | 0.121680556 | -2.974241109 | 0.002937142 | 0.061267048 | fabp3     | ZDB-GENE-020318-2    | fabp3     |
| ENSDARG00000090389  | 104.2152916 | -0.366142414 | 0.775854263 | 1.288901857 | 0.12300231  | -2.976711694 | 0.002913579 | 0.060844516 | ndufv3    | ZDB-GENE-030131-6500 | ndufv3    |
| ENSDARG00000019332  | 242.184255  | -0.3685284   | 0.774572185 | 1.291035257 | 0.125895521 | -2.927255845 | 0.003419674 | 0.068491828 | ndufb4    | ZDB-GENE-040426-1973 | ndufb4    |
| ENSDARG00000037960  | 137.8303373 | -0.37450208  | 0.771371592 | 1.296392051 | 0.112952869 | -3.315560569 | 0.000914595 | 0.026291754 | lrrc17    | ZDB-GENE-030131-9774 | lrrc17    |
| ENSDARG00000039007  | 3661.598659 | -0.37760052  | 0.769716714 | 1.299179272 | 0.126289627 | -2.989956738 | 0.00279017  | 0.058936327 | eno3      | ZDB-GENE-031006-5    | eno3      |
| ENSDARG00000031100  | 523.694031  | -0.38290857  | 0.76688993  | 1.303968094 | 0.099728095 | -3.839525557 | 0.000123272 | 0.005531619 | ivns1abpa | ZDB-GENE-031222-2    | ivns1abpa |
| ENSDARG00000074169  | 106.2479695 | -0.383454149 | 0.766599972 | 1.304461305 | 0.13282069  | -2.887006144 | 0.003889266 | 0.074689927 | gpam      | ZDB-GENE-101026-1    | gpam      |
| ENSDARG00000025218  | 78.43560954 | -0.385234372 | 0.765654605 | 1.306071947 | 0.130102543 | -2.961005695 | 0.003066363 | 0.063135116 | myo5ab    | ZDB-GENE-050411-72   | myo5ab    |
| ENSDARG00000063899  | 12765.10769 | -0.386101728 | 0.765194427 | 1.3068574   | 0.122773789 | -3.144822113 | 0.001661878 | 0.041049841 | mt-nd2    | ZDB-GENE-011205-8    | mt-nd2    |
| ENSDARG00000021208  | 528.80523   | -0.38642904  | 0.765020843 | 1.307153928 | 0.129461578 | -2.984893629 | 0.00283677  | 0.059783374 | serpind1  | ZDB-GENE-030711-2    | serpind1  |
| ENSDARG00000032619  | 799.8746877 | -0.386430009 | 0.765020329 | 1.307154806 | 0.108202675 | -3.57135355  | 0.000355141 | 0.012861981 | tob1a     | ZDB-GENE-031030-4    | tob1a     |
| ENSDARG00000057805  | 86.45071668 | -0.389916565 | 0.76317374  | 1.310317622 | 0.138298257 | -2.819388856 | 0.004811519 | 0.086786596 | mrpl28    | ZDB-GENE-050522-113  | mrpl28    |
| ENSDARG00000035918  | 152.4952868 | -0.390599379 | 0.762812622 | 1.31093793  | 0.129867621 | -3.007673316 | 0.00263256  | 0.056449688 | bwz2      | ZDB-GENE-040426-746  | bwz2      |
| ENSDARG00000037860  | 509.9740264 | -0.396149653 | 0.75988836  | 1.315991028 | 0.127004032 | -3.119189582 | 0.001813492 | 0.043774759 | cox6b2    | ZDB-GENE-040426-1566 | cox6b2    |
| ENSDARG00000098955  | 79.82279428 | -0.397781912 | 0.759024357 | 1.317480777 | 0.140566807 | -2.829842414 | 0.004657094 | 0.085001199 | ssh2b     | ZDB-GENE-081205-4    | ssh2b     |
| ENSDARG000000101849 | 443.5503324 | -0.398336684 | 0.758732539 | 1.317987496 | 0.134304405 | -2.96592419  | 0.003017749 | 0.062368171 | adipor2   | ZDB-GENE-041210-60   | adipor2   |
| ENSDARG00000004692  | 97.67011629 | -0.398499961 | 0.758646674 | 1.318136669 | 0.135263271 | -2.946106195 | 0.003218019 | 0.065420014 | nabp1a    | ZDB-GENE-041212-71   | nabp1a    |
| ENSDARG000000017571 | 272.3667617 | -0.402128417 | 0.756741034 | 1.321456026 | 0.100692982 | -3.9936092   | 6.50751E-05 | 0.003262266 | mccc2     | ZDB-GENE-040426-2493 | mccc2     |
| ENSDARG0000009865   | 453.9356124 | -0.40292812  | 0.75632168  | 1.322188727 | 0.142702463 | -2.823554074 | 0.004749441 | 0.086171632 | hnrnpabb  | ZDB-GENE-040426-2516 | hnrnpabb  |
| ENSDARG00000076381  | 306.7560263 | -0.403354216 | 0.756098336 | 1.32257929  | 0.131115531 | -3.076326764 | 0.00209568  | 0.047841158 | slc25a1b  | ZDB-GENE-130114-1    | slc25a1b  |
| ENSDARG00000040705  | 133.8690063 | -0.404016276 | 0.755751438 | 1.323186367 | 0.122820064 | -3.289497369 | 0.001003665 | 0.027958282 | glsb      | ZDB-GENE-030616-550  | glsb      |

|                      |             |              |             |             |             |              |             |             |                   |                      |                   |
|----------------------|-------------|--------------|-------------|-------------|-------------|--------------|-------------|-------------|-------------------|----------------------|-------------------|
| ENSDARG00000101076   | 115.8625833 | -0.405534216 | 0.754956688 | 1.324579299 | 0.126379036 | -3.208872527 | 0.001332566 | 0.034824633 | irx3a             | ZDB-GENE-991119-5    | irx3a             |
| ENS DARG00000076547  | 95.90303187 | -0.405839771 | 0.754796809 | 1.324859867 | 0.14018637  | -2.895001638 | 0.003791566 | 0.073197506 | si:ch211-221f10.2 | ZDB-GENE-140106-124  | si:ch211-221f10.2 |
| ENS DARG00000075768  | 363.27511   | -0.40769764  | 0.753825425 | 1.326567089 | 0.095878165 | -4.252246988 | 2.11636E-05 | 0.001280817 | sdhb              | ZDB-GENE-030131-8005 | sdhb              |
| ENS DARG00000093448  | 247.2944668 | -0.408424669 | 0.753445639 | 1.327235766 | 0.116256282 | -3.513140656 | 0.000442843 | 0.015285976 | mpc1              | ZDB-GENE-040718-94   | mpc1              |
| ENS DARG00000038768  | 134.2940925 | -0.411509587 | 0.751836266 | 1.330076833 | 0.138049313 | -2.980888332 | 0.002874136 | 0.060294583 | mrpl12            | ZDB-GENE-050417-187  | mrpl12            |
| ENS DARG00000044980  | 68.39432323 | -0.411908306 | 0.751628509 | 1.330444479 | 0.12570398  | -3.27681196  | 0.001049863 | 0.002942732 | kpna6             | ZDB-GENE-130530-626  | kpna6             |
| ENS DARG00000006290  | 316.4798667 | -0.412547754 | 0.751295437 | 1.331034305 | 0.122181686 | -3.376510576 | 0.000734115 | 0.022324392 | ndufs5            | ZDB-GENE-050522-437  | ndufs5            |
| ENS DARG00000014059  | 51.35091304 | -0.413478063 | 0.750811127 | 1.331892887 | 0.149595979 | -2.763965092 | 0.005710365 | 0.099112539 | cldn5b            | ZDB-GENE-041010-140  | cldn5b            |
| ENS DARG00000045262  | 83.60650846 | -0.415339539 | 0.749842998 | 1.333612507 | 0.14297421  | -2.904996223 | 0.003672575 | 0.071576314 | gsnb              | ZDB-GENE-030131-8567 | gsnb              |
| ENS DARG00000043608  | 121.8086028 | -0.418194458 | 0.748360616 | 1.336254178 | 0.145810699 | -2.868064294 | 0.004129916 | 0.077823368 | eif4ebp1          | ZDB-GENE-030131-2332 | eif4ebp1          |
| ENS DARG00000089204  | 126.3698397 | -0.420373729 | 0.74723103  | 1.338274188 | 0.123916747 | -3.392388346 | 0.000692862 | 0.021316502 | smim13            | ZDB-GENE-141212-279  | smim13            |
| ENS DARG00000014577  | 87.40177329 | -0.420560775 | 0.747134157 | 1.338447707 | 0.14591663  | -2.882199066 | 0.003949102 | 0.075290747 | rhpn2             | ZDB-GENE-030131-9927 | rhpn2             |
| ENS DARG00000035990  | 397.5780914 | -0.422646694 | 0.746054695 | 1.340384301 | 0.143843318 | -2.938243491 | 0.003300777 | 0.066660472 | cited4a           | ZDB-GENE-030131-7661 | cited4a           |
| ENS DARG00000075192  | 63.9829865  | -0.422854468 | 0.745947257 | 1.340577353 | 0.137869351 | -3.067066503 | 0.002161708 | 0.048901399 | yme111a           | ZDB-GENE-091113-41   | yme111a           |
| ENS DARG00000059610  | 67.30614306 | -0.423104828 | 0.745817819 | 1.340810013 | 0.133559262 | -3.167918279 | 0.001535347 | 0.03885462  | gpr146            | ZDB-GENE-050823-3    | gpr146            |
| ENS DARG00000035810  | 221.6558281 | -0.425191938 | 0.744739644 | 1.342751132 | 0.114839497 | -3.702488682 | 0.000213495 | 0.008520345 | rgcc              | ZDB-GENE-040704-31   | rgcc              |
| ENS DARG00000098215  | 83.44535696 | -0.426029209 | 0.744307558 | 1.343530627 | 0.146308743 | -2.911850648 | 0.003592944 | 0.070547471 | BICD2             |                      |                   |
| ENS DARG00000037748  | 172.8690385 | -0.429605174 | 0.74246495  | 1.346864927 | 0.125320902 | -3.42804086  | 0.000607954 | 0.019240061 | slc43a1b          | ZDB-GENE-070209-173  | slc43a1b          |
| ENS DARG00000013044  | 187.838707  | -0.431852541 | 0.741309271 | 1.348964648 | 0.114017911 | -3.787585086 | 0.000152119 | 0.006585125 | ndufv2            | ZDB-GENE-040426-1713 | ndufv2            |
| ENS DARG00000039677  | 365.3452885 | -0.433148619 | 0.740643598 | 1.350177067 | 0.142037127 | -3.049545061 | 0.002291882 | 0.050741341 | dsc2l             | ZDB-GENE-031116-55   | dsc2l             |
| ENS DARG00000018111  | 56.1845452  | -0.435655418 | 0.739357787 | 1.352525147 | 0.14071837  | -3.095938486 | 0.001961911 | 0.045710357 | kdm7aa            | ZDB-GENE-030131-9829 | kdm7aa            |
| ENS DARG00000021439  | 691.9110344 | -0.437563002 | 0.738380828 | 1.354314688 | 0.101077804 | -4.328972172 | 1.49807E-05 | 0.000953684 | ncoa4             | ZDB-GENE-040426-689  | ncoa4             |
| ENS DARG00000043587  | 150.590179  | -0.437868693 | 0.73822439  | 1.354601682 | 0.127916201 | -3.423090186 | 0.000619135 | 0.019538339 | srd5a2a           | ZDB-GENE-050417-199  | srd5a2a           |
| ENS DARG00000016875  | 430.5495735 | -0.439199582 | 0.73754369  | 1.355851882 | 0.117723356 | -3.730776925 | 0.00019089  | 0.007839281 | gys1              | ZDB-GENE-040426-1243 | gys1              |
| ENS DARG00000002071  | 124.890102  | -0.440614258 | 0.736820825 | 1.357182054 | 0.142277118 | -3.096873666 | 0.001955732 | 0.046575435 | adss              | ZDB-GENE-050417-337  | adss              |
| ENS DARG00000013841  | 77.82676265 | -0.441439739 | 0.736399351 | 1.357958828 | 0.11199537  | -3.941589183 | 8.09495E-05 | 0.00393968  | abl2              | ZDB-GENE-020809-2    | abl2              |
| ENS DARG00000075709  | 125.914652  | -0.441508836 | 0.736364083 | 1.358023868 | 0.144121872 | -3.063440887 | 0.002188074 | 0.049063019 | ndufb3            | ZDB-GENE-091204-407  | ndufb3            |
| ENS DARG00000062799  | 49.37782159 | -0.441589401 | 0.736322963 | 1.358099707 | 0.151959977 | -2.905958605 | 0.003661299 | 0.071508042 | baiap2a           | ZDB-GENE-060421-2756 | baiap2a           |
| ENS DARG00000060196  | 45.09951733 | -0.441687574 | 0.736272859 | 1.358192127 | 0.158308333 | -2.790046269 | 0.005270051 | 0.093229228 | lhpp              | ZDB-GENE-070615-43   | lhpp              |
| ENS DARG00000043457  | 8660.890259 | -0.442275121 | 0.735973068 | 1.358745371 | 0.124295327 | -3.55826023  | 0.000373319 | 0.013362509 | gapdh             | ZDB-GENE-030115-1    | gapdh             |
| ENS DARG00000042684  | 1398.716342 | -0.44261982  | 0.735797245 | 1.359070052 | 0.125515517 | -3.526415137 | 0.000421226 | 0.014649751 | serpinc1          | ZDB-GENE-030131-264  | serpinc1          |
| ENS DARG00000095273  | 232.2720518 | -0.443087043 | 0.735558993 | 1.359510264 | 0.160208389 | -2.765691892 | 0.005680217 | 0.098696616 | cox8a             | ZDB-GENE-030131-9136 | cox8a             |
| ENS DARG00000097804  | 91.67183894 | -0.443534067 | 0.735331113 | 1.359931578 | 0.148646203 | -2.983823728 | 0.002846707 | 0.059924163 | lypc              | ZDB-GENE-131127-361  | lypc              |
| ENS DARG000000492954 | 81.88151698 | -0.447443083 | 0.733341412 | 1.363621341 | 0.150819716 | -2.966741317 | 0.003009741 | 0.062357217 | mrpl34            | ZDB-GENE-070912-582  | mrpl34            |
| ENS DARG00000029995  | 8993.102577 | -0.447736057 | 0.733192505 | 1.363898285 | 0.149098623 | -3.002952326 | 0.002673743 | 0.057000609 | tnni2b.2          | ZDB-GENE-040801-9    | tnni2b.2          |
| ENS DARG00000061994  | 748.3631622 | -0.447796832 | 0.733161619 | 1.363955742 | 0.138379632 | -3.236002477 | 0.001212163 | 0.032103989 | acacb             | ZDB-GENE-060526-132  | acacb             |
| ENS DARG000000105040 | 60.07738279 | -0.450406863 | 0.731836429 | 1.366425556 | 0.153884747 | -2.926910384 | 0.003423475 | 0.068491828 | dipk1c            | ZDB-GENE-030131-8001 | dipk1c            |
| ENS DARG00000063914  | 1444.155945 | -0.452962755 | 0.730541049 | 1.368848474 | 0.138669805 | -3.266484394 | 0.001088918 | 0.029690365 | mt-nd3            | ZDB-GENE-011205-9    | mt-nd3            |
| ENS DARG000000102362 | 174.7170902 | -0.453020829 | 0.730511642 | 1.368903577 | 0.112261994 | -4.035389115 | 5.45119E-05 | 0.002819274 | slc25a12          | ZDB-GENE-031006-11   | slc25a12          |
| ENS DARG00000044251  | 56.67031596 | -0.454651792 | 0.729686268 | 1.370451993 | 0.132622724 | -3.428159051 | 0.000607689 | 0.019240061 | rasgef1bb         | ZDB-GENE-040801-220  | rasgef1bb         |
| ENS DARG00000020956  | 1841.84982  | -0.457271324 | 0.728362563 | 1.372942613 | 0.121379453 | -3.767287735 | 0.000165031 | 0.006995935 | pck2              | ZDB-GENE-040426-2266 | pck2              |
| ENS DARG00000017180  | 298.0362864 | -0.457606877 | 0.728193174 | 1.37326198  | 0.104723261 | -4.369677511 | 1.2443E-05  | 0.000814685 | npc1              | ZDB-GENE-030131-3161 | npc1              |
| ENS DARG000000016188 | 182.8431492 | -0.457967726 | 0.72801106  | 1.373605505 | 0.118271422 | -3.872175707 | 0.000107868 | 0.004998887 | SBN02             | ZDB-GENE-091204-463  | si:ch73-63e15.2   |
| ENS DARG00000035869  | 920.6705713 | -0.45845824  | 0.72776358  | 1.374072608 | 0.08897857  | -5.152456798 | 2.57096E-07 | 2.79885E-05 | azin1b            | ZDB-GENE-030121-1    | azin1b            |
| ENS DARG000000103220 | 116.2506503 | -0.458651443 | 0.727666125 | 1.374256634 | 0.160890989 | -2.850696894 | 0.004362353 | 0.081185559 | slc10a3           | ZDB-GENE-040426-2347 | slc10a3           |
| ENS DARG00000025549  | 105.0496044 | -0.4631438   | 0.725403796 | 1.378542552 | 0.145338312 | -3.186660096 | 0.001439258 | 0.030708609 | ndufaf1           | ZDB-GENE-050306-9    | ndufaf1           |
| ENS DARG00000015164  | 628.6450649 | -0.46318807  | 0.725381537 | 1.378584854 | 0.116712355 | -3.053067559 | 0.002265149 | 0.050270468 | mknk2b            | ZDB-GENE-030829-2    | mknk2b            |
| ENS DARG00000007285  | 57.77791258 | -0.463835581 | 0.725056044 | 1.37920373  | 0.162962606 | -2.846270027 | 0.004423467 | 0.081874186 | mrpl57            | ZDB-GENE-040426-1745 | mrpl57            |
| ENS DARG00000062837  | 164.967784  | -0.465989979 | 0.723974115 | 1.381264854 | 0.133348074 | -3.494538497 | 0.000474882 | 0.016239889 | spata13           | ZDB-GENE-091116-25   | spata13           |
| ENS DARG00000099499  | 825.1294757 | -0.466485009 | 0.723725741 | 1.381738887 | 0.117147429 | -3.982033703 | 6.83281E-05 | 0.003416033 | ndufa4l           | ZDB-GENE-040426-2756 | ndufa4l           |
| ENS DARG00000007836  | 644.5799523 | -0.467067013 | 0.723433839 | 1.382296413 | 0.116600054 | -4.005701957 | 6.18336E-05 | 0.003133923 | ctsla             | ZDB-GENE-030131-106  | ctsla             |
| ENS DARG00000005423  | 352.7513495 | -0.468831346 | 0.722549662 | 1.383987915 | 0.118079663 | -3.970466482 | 7.1732E-05  | 0.003547651 | pgam1a            | ZDB-GENE-030131-1827 | pgam1a            |
| ENS DARG000000034105 | 131.4916812 | -0.471357665 | 0.721285504 | 1.386413555 | 0.148172323 | -3.181145129 | 0.001466941 | 0.037641262 | mtus1b            | ZDB-GENE-070619-5    | mtus1b            |
| ENS DARG00000059391  | 233.7916108 | -0.472348092 | 0.720790503 | 1.387365671 | 0.14271451  | -3.309741183 | 0.000933823 | 0.026636389 | gyg1b             | ZDB-GENE-040625-30   | gyg1b             |

|                      |             |              |             |             |             |              |             |             |                  |                      |                  |
|----------------------|-------------|--------------|-------------|-------------|-------------|--------------|-------------|-------------|------------------|----------------------|------------------|
| ENS DARG00000103522  | 105.0861129 | -0.473562226 | 0.72018416  | 1.388533733 | 0.149868632 | -3.159848864 | 0.00157851  | 0.03947903  | si:zfos-943e10.1 | ZDB-GENE-030131-5694 | si:zfos-943e10.1 |
| ENS DARG00000044601  | 1236.869207 | -0.47626641  | 0.718835513 | 1.391138837 | 0.085452123 | -5.573488353 | 2.49688E-08 | 3.67501E-06 | rtn4a            | ZDB-GENE-030710-1    | rtn4a            |
| ENS DARG00000104555  | 49.03429044 | -0.479096327 | 0.717426864 | 1.393870303 | 0.1620261   | -2.956908348 | 0.003107405 | 0.063451755 | sh2d3cb          | ZDB-GENE-040426-1052 | sh2d3cb          |
| ENS DARG00000053571  | 58.69547051 | -0.482230877 | 0.7158698   | 1.396902063 | 0.17451875  | -2.763203826 | 0.005723701 | 0.09925038  | adob             | ZDB-GENE-040426-2267 | adob             |
| ENS DARG00000063895  | 10317.81768 | -0.483044299 | 0.715466291 | 1.397689888 | 0.115537917 | -4.180829205 | 2.90448E-05 | 0.001659522 | mt-nd1           | ZDB-GENE-011205-7    | mt-nd1           |
| ENS DARG00000039997  | 250.6079501 | -0.485259795 | 0.714368417 | 1.399837921 | 0.134752192 | -3.601127283 | 0.00031684  | 0.011752479 | ptp4a3           | ZDB-GENE-040426-2220 | ptp4a3           |
| ENS DARG00000016545  | 82.18082003 | -0.486247974 | 0.713879276 | 1.400797073 | 0.142703139 | -3.4074091   | 0.000655827 | 0.020387522 | zgc:154046       | ZDB-GENE-061103-289  | zgc:154046       |
| ENS DARG00000030530  | 582.4531247 | -0.486397122 | 0.713805478 | 1.400941897 | 0.13757346  | -3.535544738 | 0.000406935 | 0.014260564 | slc22a2          | ZDB-GENE-040426-2167 | slc22a2          |
| ENS DARG00000037281  | 2314.720267 | -0.486625516 | 0.713692484 | 1.401163699 | 0.136959873 | -3.553051756 | 0.00038079  | 0.013562101 | fgg              | ZDB-GENE-040426-1998 | fgg              |
| ENS DARG000000104696 | 63.14260866 | -0.490927273 | 0.7115676   | 1.405347854 | 0.150712828 | -3.257368864 | 0.001124502 | 0.030424395 | apooa            | ZDB-GENE-031118-91   | apooa            |
| ENS DARG00000041797  | 1278.06918  | -0.491306208 | 0.711380726 | 1.405717028 | 0.128521725 | -3.822748316 | 0.000131972 | 0.005822613 | cx28.9           | ZDB-GENE-041114-200  | cx28.9           |
| ENS DARG00000039605  | 1217.452887 | -0.491902812 | 0.711086606 | 1.406298461 | 0.128012794 | -3.842606631 | 0.000121734 | 0.005516432 | mat1a            | ZDB-GENE-030131-6127 | mat1a            |
| ENS DARG00000089836  | 64.51695224 | -0.492437613 | 0.710823059 | 1.406819866 | 0.146235375 | -3.367431524 | 0.000758719 | 0.022921028 | MRPs12           | ZDB-GENE-091204-48   | si:dkey-17e16.10 |
| ENS DARG00000070394  | 295.1594004 | -0.492863087 | 0.710613456 | 1.407234822 | 0.157559267 | -3.12811233  | 0.001759329 | 0.042735141 | uroc1            | ZDB-GENE-081022-148  | uroc1            |
| ENS DARG00000006422  | 50.23818782 | -0.493774012 | 0.710164913 | 1.408123637 | 0.177822586 | -2.776778942 | 0.00549005  | 0.09619614  | esy3             | ZDB-GENE-050809-35   | esy3             |
| ENS DARG00000008310  | 118.5000613 | -0.494907573 | 0.709607138 | 1.409230469 | 0.111642924 | -4.432950652 | 9.29521E-06 | 0.000626423 | ip6k2a           | ZDB-GENE-030131-760  | ip6k2a           |
| ENS DARG00000076592  | 112.6757034 | -0.495543373 | 0.709294481 | 1.409851658 | 0.129660589 | -3.821850396 | 0.000132454 | 0.005829879 | man1b1b          | ZDB-GENE-070705-482  | man1b1b          |
| ENS DARG00000029751  | 100.1243857 | -0.497277092 | 0.708442618 | 1.411546927 | 0.144397283 | -3.443811969 | 0.000573574 | 0.042735141 | wbp11b           | ZDB-GENE-050522-112  | wbp11b           |
| ENS DARG00000055592  | 156.1082086 | -0.498272068 | 0.707954198 | 1.412520757 | 0.143187993 | -3.479845335 | 0.000501703 | 0.016813001 | capn2b           | ZDB-GENE-050522-84   | capn2b           |
| ENS DARG00000035835  | 216.6337969 | -0.499083818 | 0.707555971 | 1.413315752 | 0.113549009 | -4.395316357 | 1.10612E-05 | 0.000732026 | eef2k            | ZDB-GENE-020916-2    | eef2k            |
| ENS DARG00000005104  | 140.5162141 | -0.499598363 | 0.707303662 | 1.413819909 | 0.112537699 | -4.439386673 | 9.02156E-06 | 0.000612467 | limk2            | ZDB-GENE-040718-398  | limk2            |
| ENS DARG00000034470  | 1706.75835  | -0.501393393 | 0.706421169 | 1.41546927  | 0.147074935 | -3.409101582 | 0.000651772 | 0.020328844 | aldoab           | ZDB-GENE-040426-2299 | aldoab           |
| ENS DARG00000076118  | 40.66290858 | -0.50215736  | 0.706050187 | 1.416329914 | 0.150907127 | -3.327592079 | 0.000876    | 0.025380558 | cdip1            | ZDB-GENE-070720-18   | cdip1            |
| ENS DARG00000016649  | 142.6737456 | -0.504089803 | 0.705105089 | 1.418228313 | 0.148868485 | -3.386141815 | 0.000708827 | 0.021771297 | akr7a3           | ZDB-GENE-040718-62   | akr7a3           |
| ENS DARG00000063572  | 867.7332935 | -0.504504165 | 0.704902602 | 1.418635706 | 0.111854106 | -4.510376817 | 6.47126E-06 | 0.000465071 | perp             | ZDB-GENE-050104-1    | perp             |
| ENS DARG00000036414  | 495.7396749 | -0.504550448 | 0.704879988 | 1.418681218 | 0.144789813 | -3.484709568 | 0.000492671 | 0.016545826 | si:ch73-335121.1 | ZDB-GENE-130530-591  | si:ch73-335121.1 |
| ENS DARG00000033182  | 83.66549514 | -0.505071261 | 0.704625572 | 1.419193454 | 0.171825334 | -2.939445832 | 0.003287997 | 0.066475358 | arl4ab           | ZDB-GENE-030219-167  | arl4ab           |
| ENS DARG00000102822  | 76.27704738 | -0.505530655 | 0.704401236 | 1.419645437 | 0.146131229 | -3.459429299 | 0.000541321 | 0.017732747 | pam16            | ZDB-GENE-040426-1776 | pam16            |
| ENS DARG00000039093  | 1349.623767 | -0.506338107 | 0.704007104 | 1.420440211 | 0.108725598 | -4.657027561 | 3.20808E-06 | 0.000252231 | got1             | ZDB-GENE-040426-2003 | got1             |
| ENS DARG00000061242  | 186.1663469 | -0.506637498 | 0.703861023 | 1.420735014 | 0.165819817 | -3.055349515 | 0.002247984 | 0.05007071  | tuft1a           | ZDB-GENE-061103-184  | tuft1a           |
| ENS DARG00000099448  | 80.80461144 | -0.507205617 | 0.703583904 | 1.421294596 | 0.134066308 | -3.783244471 | 0.000154797 | 0.006669695 | sh3d21           | ZDB-GENE-051120-57   | sh3d21           |
| ENS DARG00000099148  | 210.9530256 | -0.507875009 | 0.703257525 | 1.421954211 | 0.175077161 | -2.900863855 | 0.003721355 | 0.072297247 | bzw1b            | ZDB-GENE-040426-2881 | bzw1b            |
| ENS DARG00000101778  | 187.6060301 | -0.508007169 | 0.703193106 | 1.422084477 | 0.148506249 | -3.420779738 | 0.000624419 | 0.019671331 | ca5a             | ZDB-GENE-080220-57   | ca5a             |
| ENS DARG00000035332  | 36.21449263 | -0.508242767 | 0.703078281 | 1.422316729 | 0.164629396 | -3.087193288 | 0.002020562 | 0.046584328 | cfap298          | ZDB-GENE-040930-8    | cfap298          |
| ENS DARG00000003017  | 84.11291049 | -0.510729382 | 0.701867506 | 1.424770333 | 0.128378008 | -3.978324542 | 6.94026E-05 | 0.003450997 | ube2al           | ZDB-GENE-030131-4195 | ube2al           |
| ENS DARG00000039346  | 131.8732719 | -0.511035303 | 0.701718692 | 1.425072485 | 0.134427854 | -3.801558156 | 0.000143789 | 0.006268791 | ndufa5           | ZDB-GENE-050320-17   | ndufa5           |
| ENS DARG00000063435  | 84.29200412 | -0.511757374 | 0.701367568 | 1.425785915 | 0.157731889 | -3.244476297 | 0.001176668 | 0.031511412 | trpm4b.2         | ZDB-GENE-061214-2    | trpm4b.2         |
| ENS DARG00000062562  | 69.37983158 | -0.513352109 | 0.700592715 | 1.42736283  | 0.182652028 | -2.810546992 | 0.004945737 | 0.08834142  | egl2             | ZDB-GENE-060503-757  | egl2             |
| ENS DARG00000001950  | 1128.068685 | -0.513424906 | 0.700557364 | 1.427434855 | 0.133373403 | -3.849529923 | 0.000118345 | 0.005400367 | ak1              | ZDB-GENE-040822-37   | ak1              |
| ENS DARG00000055705  | 1387.073482 | -0.517247864 | 0.698703434 | 1.431222391 | 0.150195056 | -3.44384082  | 0.000573513 | 0.018513373 | f5               | ZDB-GENE-030131-5531 | f5               |
| ENS DARG00000029230  | 781.4975609 | -0.518770501 | 0.697966403 | 1.432733718 | 0.156531364 | -3.314163297 | 0.000919178 | 0.026382275 | pnp4b            | ZDB-GENE-040426-1887 | pnp4b            |
| ENS DARG00000039915  | 34.13136119 | -0.519043595 | 0.697834295 | 1.433004952 | 0.173792582 | -2.986569331 | 0.002821269 | 0.059524885 | bola1            | ZDB-GENE-040801-76   | bola1            |
| ENS DARG00000070844  | 4344.925202 | -0.519504142 | 0.697611563 | 1.433462478 | 0.158499341 | -3.277642285 | 0.00104678  | 0.028916893 | gamt             | ZDB-GENE-051030-97   | gamt             |
| ENS DARG00000018441  | 77.95939672 | -0.520359158 | 0.697198245 | 1.434312274 | 0.13377659  | -3.889762455 | 0.000100342 | 0.004715309 | heg1             | ZDB-GENE-040714-1    | heg1             |
| ENS DARG00000027316  | 209.7116264 | -0.52225841  | 0.696281014 | 1.436201735 | 0.145785722 | -3.582370099 | 0.000340491 | 0.01242927  | tcp11l2          | ZDB-GENE-040426-1956 | tcp11l2          |
| ENS DARG00000058053  | 637.1191627 | -0.523530027 | 0.69566757  | 1.437468186 | 0.163596596 | -3.200127872 | 0.001373666 | 0.035695921 | serping1         | ZDB-GENE-030131-1262 | serping1         |
| ENS DARG00000043394  | 29.15709852 | -0.523663735 | 0.695603099 | 1.437601416 | 0.172718993 | -3.031882743 | 0.002430336 | 0.052915172 | si:dkey-71h2.2   | ZDB-GENE-041014-145  | si:dkey-71h2.2   |
| ENS DARG00000105214  | 95.15185195 | -0.524517297 | 0.695191671 | 1.438452216 | 0.127655103 | -4.108862752 | 3.97612E-05 | 0.00215155  | agtpbp1          | ZDB-GENE-081104-267  | agtpbp1          |
| ENS DARG00000104138  | 58.2354128  | -0.525653009 | 0.694644621 | 1.439585034 | 0.186422709 | -2.819683349 | 0.004807106 | 0.086786596 | igfbp7           | ZDB-GENE-040426-2423 | igfbp7           |
| ENS DARG00000005799  | 113.8297985 | -0.526004684 | 0.694475313 | 1.439935993 | 0.11376549  | -4.623587371 | 3.7716E-06  | 0.000289124 | smim14           | ZDB-GENE-040426-22   | smim14           |
| ENS DARG00000012968  | 185.9436121 | -0.526159177 | 0.694400948 | 1.440090199 | 0.101717083 | -5.172770987 | 2.30648E-07 | 2.5563E-05  | rhoub            | ZDB-GENE-050417-308  | rhoub            |
| ENS DARG00000058094  | 294.2737347 | -0.528676632 | 0.693190298 | 1.442605303 | 0.130606717 | -4.047851785 | 5.16899E-05 | 0.0027249   | ciarta           | ZDB-GENE-030131-7016 | ciarta           |
| ENS DARG00000061391  | 64.09332042 | -0.530848862 | 0.692147364 | 1.444779033 | 0.167544237 | -3.168410161 | 0.001532751 | 0.038842362 | grhl1            | ZDB-GENE-030131-3665 | grhl1            |
| ENS DARG00000040565  | 18352.84411 | -0.531196305 | 0.691980695 | 1.44512702  | 0.175552852 | -3.025848337 | 0.002479366 | 0.053855232 | ckmb             | ZDB-GENE-040426-2128 | ckmb             |

|                     |             |              |             |             |             |              |             |             |                   |                      |                   |
|---------------------|-------------|--------------|-------------|-------------|-------------|--------------|-------------|-------------|-------------------|----------------------|-------------------|
| ENSDARG00000101251  | 1274.265908 | -0.533330936 | 0.690957588 | 1.447266833 | 0.132300028 | -4.031223158 | 5.54873E-05 | 0.002847135 | ldha              | ZDB-GENE-991026-5    | ldha              |
| ENSDARG00000097877  | 164.6195781 | -0.535659028 | 0.689843482 | 1.449604187 | 0.127658193 | -4.196041139 | 2.71621E-05 | 0.00157643  | si:ch211-167b20.8 | ZDB-GENE-081104-147  | si:ch211-167b20.8 |
| ENSDARG00000103991  | 142.7446227 | -0.536825389 | 0.689285996 | 1.450776608 | 0.133176493 | -4.030932027 | 5.55561E-05 | 0.002847135 | sec14l1           | ZDB-GENE-040426-801  | sec14l1           |
| ENSDARG00000068738  | 746.1918412 | -0.538030624 | 0.688710404 | 1.451989101 | 0.150136124 | -3.583618725 | 0.000338867 | 0.012394569 | cox5b2            | ZDB-GENE-060825-71   | cox5b2            |
| ENSDARG00000042469  | 117.2703598 | -0.539470339 | 0.688023459 | 1.453438814 | 0.15109878  | -3.570315655 | 0.000356551 | 0.012864604 | ndufa12           | ZDB-GENE-050828-1    | ndufa12           |
| ENSDARG00000057575  | 67.77787308 | -0.540083325 | 0.687731187 | 1.454056496 | 0.152331278 | -3.545452594 | 0.000391939 | 0.01381399  | pnp4a             | ZDB-GENE-040625-83   | pnp4a             |
| ENSDARG00000053858  | 317.7296587 | -0.540496604 | 0.687534206 | 1.454473089 | 0.143348826 | -3.770498983 | 0.000162921 | 0.006954592 | crip1             | ZDB-GENE-041111-1    | crip1             |
| ENSDARG00000077040  | 45.65391189 | -0.541500348 | 0.687056025 | 1.45548538  | 0.150010114 | -3.60975892  | 0.000306482 | 0.011460672 | si:ch211-85n16.4  | ZDB-GENE-030131-7043 | si:ch211-85n16.4  |
| ENSDARG00000029443  | 74.64110634 | -0.543519784 | 0.68609498  | 1.457524146 | 0.164938107 | -3.295295388 | 0.000983183 | 0.027658403 | zgc:92242         | ZDB-GENE-040718-371  | zgc:92242         |
| ENSDARG000000031657 | 48.90376301 | -0.544174958 | 0.685783473 | 1.458186205 | 0.186642745 | -2.915596627 | 0.003550092 | 0.070080027 | fahd1             | ZDB-GENE-050522-448  | fahd1             |
| ENSDARG00000032197  | 30.44438066 | -0.545939218 | 0.684945347 | 1.459970499 | 0.18795445  | -2.90463576  | 0.003676807 | 0.07158296  | klf12b            | ZDB-GENE-071004-22   | klf12b            |
| ENSDARG00000029510  | 204.5900092 | -0.546373383 | 0.68473925  | 1.460409929 | 0.159331963 | -3.429151138 | 0.000605472 | 0.019239169 | tim17a            | ZDB-GENE-031030-6    | tim17a            |
| ENSDARG00000005840  | 343.5433007 | -0.546845758 | 0.684515086 | 1.460888183 | 0.110910791 | -4.930500912 | 8.2019E-07  | 7.43343E-05 | got2b             | ZDB-GENE-030131-7917 | got2b             |
| ENSDARG000000100095 | 132.2290987 | -0.546982122 | 0.684450388 | 1.461026273 | 0.180713555 | -3.026790781 | 0.00247165  | 0.053751076 | anxa1b            | ZDB-GENE-030131-6554 | anxa1b            |
| ENSDARG00000027611  | 169.1033194 | -0.547807825 | 0.684058766 | 1.461862707 | 0.120272368 | -4.554727191 | 5.24536E-06 | 0.000387567 | cavin2a           | ZDB-GENE-090313-215  | cavin2a           |
| ENSDARG00000020693  | 443.3608104 | -0.549722405 | 0.683151564 | 1.463804012 | 0.122391968 | -4.491490862 | 7.07263E-06 | 0.000494762 | sesn1             | ZDB-GENE-040718-408  | sesn1             |
| ENSDARG00000014246  | 23.59220786 | -0.552460688 | 0.681856149 | 1.466584999 | 0.183846563 | -3.005009607 | 0.002655725 | 0.056747992 | jag2a             | ZDB-GENE-130530-549  | jag2a             |
| ENSDARG00000022689  | 152.2369877 | -0.55414149  | 0.681062027 | 1.468295047 | 0.182239104 | -3.040740922 | 0.003599968 | 0.051627457 | itgb1b.2          | ZDB-GENE-040626-2598 | itgb1b.2          |
| ENSDARG0000001797   | 59.74324137 | -0.55520218  | 0.680561677 | 1.469374537 | 0.149433872 | -3.715370358 | 0.000202906 | 0.008168643 | tent5bb           | ZDB-GENE-060503-431  | tent5bb           |
| ENSDARG00000018149  | 2242.934378 | -0.555236962 | 0.68054527  | 1.469409963 | 0.161155778 | -3.445343197 | 0.000570335 | 0.018473625 | slc38a4           | ZDB-GENE-041010-14   | slc38a4           |
| ENSDARG00000017728  | 142.3460562 | -0.555698697 | 0.680327496 | 1.469880324 | 0.165926889 | -3.349057527 | 0.00081087  | 0.024100773 | phb2b             | ZDB-GENE-040718-430  | phb2b             |
| ENSDARG00000006840  | 183.6419551 | -0.55601125  | 0.680180122 | 1.470198801 | 0.190073919 | -2.925236952 | 0.00344194  | 0.068756588 | gnmt              | ZDB-GENE-040718-271  | gnmt              |
| ENSDARG00000057352  | 30.60478262 | -0.55718659  | 0.679626216 | 1.471397036 | 0.20180641  | -2.7609955   | 0.005762547 | 0.099585406 | slc25a29          | ZDB-GENE-050913-70   | slc25a29          |
| ENSDARG00000069441  | 40.60152716 | -0.557556936 | 0.679451776 | 1.471774799 | 0.179289145 | -3.109819822 | 0.001872015 | 0.044555882 | lpar6b            | ZDB-GENE-110408-67   | lpar6b            |
| ENSDARG000000041538 | 32.64542724 | -0.560463352 | 0.678084347 | 1.474742786 | 0.197515039 | -2.837573049 | 0.004545794 | 0.08345386  | mrrps28           | ZDB-GENE-061110-52   | mrrps28           |
| ENSDARG000000100823 | 139.5887881 | -0.560600456 | 0.67801991  | 1.474882942 | 0.148775326 | -3.768101008 | 0.001644494 | 0.006899292 | selenok           | ZDB-GENE-040912-131  | selenok           |
| ENSDARG00000020031  | 35.03199591 | -0.564622696 | 0.67613222  | 1.47900066  | 0.16171392  | -3.491490991 | 0.000480333 | 0.016334862 | cldn11a           | ZDB-GENE-040718-369  | cldn11a           |
| ENSDARG00000026764  | 2615.237594 | -0.5684255   | 0.674352348 | 1.482904304 | 0.185348317 | -3.06679612  | 0.002163664 | 0.048901399 | ahsg1             | ZDB-GENE-041114-50   | ahsg1             |
| ENSDARG00000010717  | 144.0933027 | -0.568650867 | 0.674247014 | 1.483135971 | 0.161303837 | -3.525339999 | 0.00042294  | 0.014681589 | chchd10           | ZDB-GENE-040426-1753 | chchd10           |
| ENSDARG000000034600 | 116.7635806 | -0.570110363 | 0.67356526  | 1.484637138 | 0.106803885 | -5.337917819 | 9.40201E-08 | 1.16093E-05 | tmem165           | ZDB-GENE-030131-3222 | tmem165           |
| ENSDARG00000090976  | 21.22177785 | -0.571057756 | 0.673123087 | 1.485612393 | 0.184797318 | -3.090184225 | 0.002000324 | 0.04629177  | NABP2             | ZDB-GENE-160114-62   | si:ch73-190f16.2  |
| ENSDARG00000035552  | 34.76997112 | -0.57451003  | 0.671514273 | 1.489171623 | 0.164579604 | -3.490772955 | 0.000481625 | 0.016348604 | agtr2             | ZDB-GENE-050306-56   | agtr2             |
| ENSDARG00000061120  | 2356.158144 | -0.575127145 | 0.671227094 | 1.489808754 | 0.174804136 | -3.290123201 | 0.001001435 | 0.027958282 | slc43a2b          | ZDB-GENE-041212-6    | slc43a2b          |
| ENSDARG00000030107  | 291.8482929 | -0.577007332 | 0.670352889 | 1.491751607 | 0.155756979 | -3.704535979 | 0.000211778 | 0.008488655 | si:ch211-207i1.2  | ZDB-GENE-041014-149  | si:ch211-207i1.2  |
| ENSDARG00000038028  | 184.749838  | -0.577069004 | 0.670324234 | 1.491815378 | 0.161469449 | -3.573858746 | 0.000351759 | 0.01276461  | ndufa6            | ZDB-GENE-040426-1124 | ndufa6            |
| ENSDARG00000070826  | 24.76807287 | -0.577553168 | 0.670099312 | 1.492316111 | 0.198265894 | -2.913023304 | 0.003579479 | 0.070358176 | bpgm              | ZDB-GENE-040718-375  | bpgm              |
| ENSDARG00000057949  | 72.08754483 | -0.577707292 | 0.670027729 | 1.492475545 | 0.184006621 | -3.13960057  | 0.001691783 | 0.041611537 | slc43a3b          | ZDB-GENE-060312-28   | slc43a3b          |
| ENSDARG00000099902  | 39.12955985 | -0.577728676 | 0.670017798 | 1.492497667 | 0.189863666 | -3.042860632 | 0.002343408 | 0.05144872  | il17rc            | ZDB-GENE-120111-3    | il17rc            |
| ENSDARG00000067958  | 37.85171043 | -0.579936515 | 0.668993215 | 1.494783471 | 0.168931061 | -3.432977412 | 0.000596992 | 0.019035452 | sh3gl1a           | ZDB-GENE-030131-4524 | sh3gl1a           |
| ENSDARG00000028163  | 427.682758  | -0.584265842 | 0.666988669 | 1.499275845 | 0.202651229 | -2.883110279 | 0.003937696 | 0.075290747 | prg4b             | ZDB-GENE-041014-324  | prg4b             |
| ENSDARG00000016011  | 526.7834959 | -0.584917371 | 0.666687521 | 1.499953078 | 0.139088706 | -4.205354902 | 2.60673E-05 | 0.001527343 | gpcpd1            | ZDB-GENE-060503-472  | gpcpd1            |
| ENSDARG00000070892  | 577.1062886 | -0.585885755 | 0.666240169 | 1.500960234 | 0.139218849 | -4.208379523 | 2.57209E-05 | 0.001511861 | si:ch211-262h13.5 | ZDB-GENE-050208-372  | si:ch211-262h13.5 |
| ENSDARG00000068409  | 24.77503255 | -0.587207094 | 0.665630251 | 1.502335566 | 0.205397686 | -2.858878818 | 0.004251412 | 0.079651192 | vgll4l            | ZDB-GENE-070112-1682 | vgll4l            |
| ENSDARG00000004658  | 130.6033002 | -0.588308161 | 0.665122434 | 1.503482589 | 0.181896261 | -3.234305962 | 0.001219387 | 0.032233176 | zgc:101810        | ZDB-GENE-041121-7    | zgc:101810        |
| ENSDARG000000044356 | 113.8995464 | -0.588329125 | 0.66511277  | 1.503504436 | 0.165598455 | -3.552745249 | 0.000381233 | 0.013562101 | tp63              | ZDB-GENE-030819-1    | tp63              |
| ENSDARG00000098764  | 52.2828142  | -0.590947805 | 0.663906598 | 1.506235971 | 0.197142502 | -2.997566729 | 0.002721443 | 0.057883356 | musk              | ZDB-GENE-030131-6458 | musk              |
| ENSDARG000000062618 | 55.06677614 | -0.593712012 | 0.662665769 | 1.50912469  | 0.17146328  | -3.462619008 | 0.000534945 | 0.017669521 | kcnj12b           | ZDB-GENE-091118-79   | kcnj12b           |
| ENSDARG00000061660  | 43.69829957 | -0.594413966 | 0.662313437 | 1.509859145 | 0.199941512 | -2.972939244 | 0.002949628 | 0.061457827 | CABZ01055347.1    |                      |                   |
| ENSDARG000000044562 | 924.7596173 | -0.595859677 | 0.661650072 | 1.511372918 | 0.164791652 | -3.615836536 | 0.000299379 | 0.011217881 | cyccb             | ZDB-GENE-040625-38   | cyccb             |
| ENSDARG00000095947  | 69.49622584 | -0.60062568  | 0.65946789  | 1.516374057 | 0.137699957 | -4.361843614 | 1.28971E-05 | 0.000835496 | adkb              | ZDB-GENE-030131-948  | adkb              |
| ENSDARG000000078309 | 93.4031951  | -0.601023811 | 0.659285926 | 1.51679258  | 0.212233775 | -2.831895216 | 0.004627301 | 0.08461979  | fam83b            | ZDB-GENE-030131-7066 | fam83b            |
| ENSDARG00000093316  | 70.04713601 | -0.602002294 | 0.658838928 | 1.517821667 | 0.212812498 | -2.828792013 | 0.004672405 | 0.085111795 | adgrf8            | ZDB-GENE-130531-41   | adgrf8            |
| ENSDARG00000013946  | 92.34589176 | -0.602964021 | 0.65839988  | 1.518833812 | 0.159838659 | -3.772329073 | 0.000161731 | 0.00693595  | ivns1abpb         | ZDB-GENE-030131-6266 | ivns1abpb         |
| ENSDARG00000088124  | 57.20846269 | -0.605315499 | 0.657327615 | 1.521311408 | 0.145663445 | -4.155575898 | 3.24469E-05 | 0.001825561 | adrb2a            | ZDB-GENE-100414-3    | adrb2a            |

|                     |             |              |             |             |             |              |             |              |                  |                      |                  |
|---------------------|-------------|--------------|-------------|-------------|-------------|--------------|-------------|--------------|------------------|----------------------|------------------|
| ENSDARG00000087697  | 924.6478031 | -0.606174598 | 0.656936305 | 1.522217592 | 0.17489262  | -3.465981582 | 0.000528299 | 0.01749021   | lpl              | ZDB-GENE-990415-139  | lpl              |
| ENSDARG00000074635  | 514.4011324 | -0.607012391 | 0.656554924 | 1.523101821 | 0.189422044 | -3.204549899 | 0.001352738 | 0.035251673  | abca1a           | ZDB-GENE-031006-12   | abca1a           |
| ENSDARG00000031702  | 65.91818218 | -0.607976689 | 0.656116229 | 1.524120204 | 0.199440181 | -3.048416246 | 0.002300051 | 0.050749147  | prkg1b           | ZDB-GENE-080225-40   | prkg1b           |
| ENSDARG00000004754  | 156.892146  | -0.608136478 | 0.656043563 | 1.52428902  | 0.22018567  | -2.761925774 | 0.005746154 | 0.099545896  | hspa4a           | ZDB-GENE-040426-2832 | hspa4a           |
| ENSDARG00000029388  | 306.4138852 | -0.608597344 | 0.655834025 | 1.524776029 | 0.146825258 | -4.145045299 | 3.39747E-05 | 0.001877074  | si:dkey-90m5.4   | ZDB-GENE-041014-250  | si:dkey-90m5.4   |
| ENSDARG00000075614  | 136.1492032 | -0.60942808  | 0.655456489 | 1.525654282 | 0.196400076 | -3.102993103 | 0.001915741 | 0.04517043   | apoc4            | ZDB-GENE-010222-25   | apoc4            |
| ENSDARG00000115266  | 39.66975374 | -0.611028837 | 0.654729624 | 1.527348027 | 0.194173665 | -3.146816211 | 0.001650587 | 0.040871461  | imp3             | ZDB-GENE-040426-1062 | imp3             |
| ENSDARG00000019360  | 610.6562594 | -0.613419704 | 0.65364549  | 1.529881281 | 0.117790759 | -5.207706512 | 1.91189E-07 | 2.18471E-05  | sec23b           | ZDB-GENE-030131-5479 | sec23b           |
| ENSDARG00000104517  | 278.0785573 | -0.614829729 | 0.653006959 | 1.531377249 | 0.192808819 | -3.188805011 | 0.001428622 | 0.036898325  | uqcr10           | ZDB-GENE-170406-3    | uqcr10           |
| ENSDARG00000028943  | 100.9918667 | -0.615646163 | 0.652637521 | 1.532244114 | 0.165071287 | -3.729577529 | 0.000191801 | 0.007859146  | mtss1a           | ZDB-GENE-030219-89   | mtss1a           |
| ENSDARG00000104949  | 117.3422778 | -0.617078821 | 0.651989746 | 1.533766454 | 0.214789632 | -2.872945097 | 0.004066648 | 0.076894334  | slc27a1b         | ZDB-GENE-061013-672  | slc27a1b         |
| ENSDARG00000041051  | 65.62418397 | -0.619266    | 0.651002054 | 1.536093465 | 0.222384594 | -2.784662326 | 0.005358349 | 0.09451861   | mid1ip1a         | ZDB-GENE-990415-81   | mid1ip1a         |
| ENSDARG00000054363  | 85.46834733 | -0.619956281 | 0.650690646 | 1.536828609 | 0.135802516 | -4.565131056 | 4.99182E-06 | 0.000372083  | si:zfos-464b6.2  | ZDB-GENE-030131-5337 | si:zfos-464b6.2  |
| ENSDARG00000040815  | 442.5965278 | -0.620467952 | 0.65045991  | 1.537373763 | 0.138003263 | -4.496038263 | 6.92313E-06 | 0.000491783  | tsku             | ZDB-GENE-030131-4683 | tsku             |
| ENSDARG00000021866  | 92.79452445 | -0.623488928 | 0.649099285 | 1.540596367 | 0.190201824 | -3.278038647 | 0.001045311 | 0.028916893  | upk1a            | ZDB-GENE-060421-2603 | upk1a            |
| ENSDARG00000025766  | 21.54620678 | -0.624726083 | 0.648542901 | 1.541918041 | 0.209772995 | -2.978105363 | 0.002900363 | 0.060665592  | zgc:66440        | ZDB-GENE-040426-1640 | zgc:66440        |
| ENSDARG00000091902  | 116.5735752 | -0.626307765 | 0.647832268 | 1.543609433 | 0.13266482  | -4.720978515 | 2.34713E-06 | 0.000192779  | b3gnt2b          | ZDB-GENE-050913-158  | b3gnt2b          |
| ENSDARG00000046014  | 29.65858124 | -0.627563178 | 0.647287768 | 1.544953244 | 0.204978905 | -3.061598837 | 0.000201583 | 0.049275819  | kcnab6a          | ZDB-GENE-080722-21   | kcnab6a          |
| ENSDARG00000098821  | 58.83515802 | -0.627947354 | 0.64709644  | 1.545364706 | 0.157125185 | -3.99647806  | 6.42918E-05 | 0.003240661  | sec14l1          | ZDB-GENE-040426-801  | sec14l1          |
| ENSDARG00000012199  | 111.2853656 | -0.628306139 | 0.646935533 | 1.545749072 | 0.1884626   | -3.333850528 | 0.000856527 | 0.024973659  | gpt2             | ZDB-GENE-030729-8    | gpt2             |
| ENSDARG00000070412  | 17.5725776  | -0.629285633 | 0.646496456 | 1.546798888 | 0.218332013 | -2.882241697 | 0.003948567 | 0.075290747  | mtmr7b           | ZDB-GENE-050913-66   | mtmr7b           |
| ENSDARG00000006760  | 35.83187636 | -0.631247144 | 0.645618067 | 1.548903371 | 0.220198805 | -2.866714672 | 0.004147568 | 0.00493768   | slc24a3          | ZDB-GENE-090312-67   | slc24a3          |
| ENSDARG00000033845  | 66.27410513 | -0.632401227 | 0.645101812 | 1.550142911 | 0.209615111 | -3.016963913 | 0.002553202 | 0.055198368  | igsf9ba          | ZDB-GENE-060503-729  | igsf9ba          |
| ENSDARG00000068257  | 20.4516725  | -0.632851126 | 0.64490067  | 1.550626393 | 0.203572555 | -3.108725169 | 0.001878964 | 0.044607261  | kcn4             | ZDB-GENE-050419-163  | kcn4             |
| ENSDARG00000019541  | 697.8367496 | -0.636565529 | 0.643242427 | 1.554623822 | 0.11833671  | -5.379273513 | 7.4787E-08  | 9.42419E-06  | gpt2l            | ZDB-GENE-050302-11   | gpt2l            |
| ENSDARG000000056379 | 45.52426318 | -0.636965144 | 0.643064278 | 1.555054501 | 0.162499525 | -3.919796949 | 8.86236E-05 | 0.004257173  | si:ch73-86n18.1  | ZDB-GENE-141216-19   | si:ch73-86n18.1  |
| ENSDARG00000061762  | 25.11292903 | -0.637067662 | 0.643018583 | 1.555165007 | 0.222258599 | -2.866335269 | 0.004152542 | 0.077957622  | trim108          | ZDB-GENE-060503-670  | trim108          |
| ENSDARG00000071082  | 143.4741207 | -0.638047937 | 0.642581817 | 1.556222061 | 0.194003744 | -3.288843422 | 0.0010006   | 0.027958282  | p4ha1b           | ZDB-GENE-030131-4089 | p4ha1b           |
| ENSDARG00000028507  | 704.107608  | -0.638252737 | 0.642490605 | 1.556442993 | 0.15771467  | -4.046882481 | 5.19043E-05 | 0.002728386  | itgb4            | ZDB-GENE-030131-7209 | itgb4            |
| ENSDARG00000007833  | 134.6892607 | -0.639008062 | 0.642154316 | 1.557258084 | 0.192493384 | -3.319636499 | 0.000901347 | 0.0525992143 | cnnm2b           | ZDB-GENE-090312-26   | cnnm2b           |
| ENSDARG00000007869  | 65.70277949 | -0.640785694 | 0.641363566 | 1.559178059 | 0.143277803 | -4.472330555 | 7.73717E-06 | 0.000531151  | ehd3             | ZDB-GENE-041014-352  | ehd3             |
| ENSDARG00000007671  | 217.6649865 | -0.642870862 | 0.640437255 | 1.561433212 | 0.141173559 | -4.553762524 | 5.26948E-06 | 0.000387792  | ghrb             | ZDB-GENE-071119-4    | ghrb             |
| ENSDARG00000036967  | 78.78671247 | -0.643475592 | 0.640168861 | 1.562087851 | 0.155309739 | -4.143176609 | 3.42529E-05 | 0.001881148  | smox             | ZDB-GENE-031201-3    | smox             |
| ENSDARG00000068213  | 54.84590975 | -0.648093352 | 0.638107092 | 1.567095773 | 0.151753652 | -4.270693606 | 1.94866E-05 | 0.001187134  | fzd10            | ZDB-GENE-990415-220  | fzd10            |
| ENSDARG00000033361  | 33.33164326 | -0.64812968  | 0.638107024 | 1.567135233 | 0.181184703 | -3.577176593 | 0.000347326 | 0.012653654  | asl              | ZDB-GENE-040426-1152 | asl              |
| ENSDARG00000105403  | 73.05777163 | -0.64885455  | 0.637786493 | 1.567922825 | 0.210152279 | -3.087544681 | 0.002018174 | 0.046584328  | abcc6b.1         | ZDB-GENE-050517-19   | abcc6b.1         |
| ENSDARG00000051912  | 86.66989672 | -0.649495287 | 0.637503299 | 1.568619334 | 0.200499569 | -3.239384953 | 0.001197878 | 0.031847624  | hbxb             | ZDB-GENE-060929-800  | hbxb             |
| ENSDARG00000026629  | 54.67341059 | -0.649675225 | 0.637423792 | 1.568814989 | 0.164150434 | -3.957803884 | 7.5647E-05  | 0.003701229  | gm5d             | ZDB-GENE-050419-45   | gm5d             |
| ENSDARG000000112959 | 360.547733  | -0.65000879  | 0.637276431 | 1.569177756 | 0.181153152 | -3.58817267  | 0.00033004  | 0.012228748  | CABZ01072309.1   |                      |                  |
| ENSDARG00000008765  | 74.26618281 | -0.652126657 | 0.6363416   | 1.57148299  | 0.166835938 | -3.908790071 | 9.27595E-05 | 0.004421217  | tmed5            | ZDB-GENE-040426-1302 | tmed5            |
| ENSDARG00000003144  | 86.56030236 | -0.655849486 | 0.634701657 | 1.57554339  | 0.196750347 | -3.333409553 | 0.000857886 | 0.024973701  | pxmp2            | ZDB-GENE-040912-184  | pxmp2            |
| ENSDARG000000028725 | 34.31022666 | -0.65795332  | 0.633776767 | 1.577842629 | 0.211734157 | -3.107450063 | 0.001887089 | 0.044724181  | adra1aa          | ZDB-GENE-030131-2831 | adra1aa          |
| ENSDARG000000038524 | 917.2853691 | -0.658178371 | 0.63367691  | 1.578088781 | 0.122080724 | -5.391337396 | 6.99352E-08 | 9.12079E-06  | pik3r1           | ZDB-GENE-030131-1280 | pik3r1           |
| ENSDARG00000099954  | 95.05040735 | -0.658186293 | 0.63367443  | 1.578097446 | 0.129932264 | -5.065610884 | 4.07093E-07 | 4.13795E-05  | plekhm1          | ZDB-GENE-030131-2752 | plekhm1          |
| ENSDARG00000015252  | 68.78240735 | -0.662006638 | 0.631998641 | 1.582281883 | 0.173345081 | -3.819010231 | 0.000133988 | 0.005869321  | st3gal3b         | ZDB-GENE-050411-13   | st3gal3b         |
| ENSDARG00000079340  | 39.03727353 | -0.66276228  | 0.631667705 | 1.583110854 | 0.179730479 | -3.687534148 | 0.000226438 | 0.008959142  | slc47a4          | ZDB-GENE-130530-865  | slc47a4          |
| ENSDARG00000041959  | 51.59083009 | -0.662826424 | 0.631639621 | 1.583181242 | 0.225491429 | -2.939475023 | 0.002876688 | 0.066475358  | cxcr4b           | ZDB-GENE-010614-1    | cxcr4b           |
| ENSDARG00000006508  | 48.35903072 | -0.662878676 | 0.631616745 | 1.583238583 | 0.204853745 | -3.235863105 | 0.001212755 | 0.032103989  | pip5k1bb         | ZDB-GENE-040912-141  | pip5k1bb         |
| ENSDARG00000096368  | 18.47159179 | -0.663080823 | 0.63152825  | 1.583460438 | 0.21387873  | -3.100265382 | 0.001933473 | 0.045430448  | neu3.5           | ZDB-GENE-071220-2    | neu3.5           |
| ENSDARG00000028731  | 69.248405   | -0.665103172 | 0.630643603 | 1.585681666 | 0.17997155  | -3.695601738 | 0.000219367 | 0.008716862  | stat4            | ZDB-GENE-030616-264  | stat4            |
| ENSDARG00000099395  | 24.30134421 | -0.665675572 | 0.63039344  | 1.586310923 | 0.193617074 | -3.438103661 | 0.000585803 | 0.018743671  | cables1          | ZDB-GENE-070912-509  | cables1          |
| ENSDARG00000013775  | 66.52026203 | -0.667657998 | 0.629527804 | 1.588492191 | 0.194035432 | -3.440907628 | 0.000579766 | 0.018664277  | si:dkey-246g23.4 | ZDB-GENE-050419-234  | si:dkey-246g23.4 |
| ENSDARG00000057529  | 26.03775427 | -0.671274892 | 0.627951529 | 1.592479601 | 0.23786238  | -2.822114586 | 0.004770813 | 0.086391155  | itpa             | ZDB-GENE-070705-218  | itpa             |
| ENSDARG00000044525  | 46.04915397 | -0.671973798 | 0.627647395 | 1.593251256 | 0.171070955 | -3.928041425 | 8.56405E-05 | 0.004135468  | pparda           | ZDB-GENE-990415-212  | pparda           |

|                     |              |              |             |             |             |              |              |             |                   |                      |                   |
|---------------------|--------------|--------------|-------------|-------------|-------------|--------------|--------------|-------------|-------------------|----------------------|-------------------|
| ENSDARG00000086746  | 319.7766715  | -0.673385971 | 0.627033327 | 1.594811564 | 0.227471135 | -2.960313938 | 0.003073257  | 0.063135116 | prodha            | ZDB-GENE-041008-73   | prodha            |
| ENSDARG00000087844  | 36.43257045  | -0.675044924 | 0.626312716 | 1.59664649  | 0.173706009 | -3.886134549 | 0.000101853  | 0.004765396 | plekhn1           | ZDB-GENE-090313-357  | plekhn1           |
| ENSDARG00000032708  | 23.94890379  | -0.675048875 | 0.626311001 | 1.596650862 | 0.199465408 | -3.384290448 | 0.000713625  | 0.021882112 | arl4cb            | ZDB-GENE-040426-2382 | arl4cb            |
| ENSDARG00000017049  | 156.2836699  | -0.67568817  | 0.626033528 | 1.597358536 | 0.125553193 | -5.381688463 | 7.37904E-08  | 9.36273E-06 | adsl              | ZDB-GENE-030131-6363 | adsl              |
| ENSDARG00000091127  | 372.2469986  | -0.676335978 | 0.625752486 | 1.598075952 | 0.146837886 | -4.606004594 | 4.10479E-06  | 0.000312979 | klf15             | ZDB-GENE-030131-7844 | klf15             |
| ENSDARG00000062058  | 152.6113647  | -0.677078352 | 0.625430573 | 1.598898493 | 0.134809412 | -5.022485739 | 5.1007E-07   | 4.96522E-05 | slc12a7b          | ZDB-GENE-030829-61   | slc12a7b          |
| ENSDARG00000043323  | 71.9522898   | -0.680304413 | 0.624033588 | 1.602477847 | 0.137213986 | -4.957981562 | 7.12293E-07  | 6.53472E-05 | lnx1              | ZDB-GENE-030131-9439 | lnx1              |
| ENSDARG00000054848  | 129.9964219  | -0.68167593  | 0.623440624 | 1.604001989 | 0.197018188 | -3.459964474 | 0.000540247  | 0.017732747 | pdk4              | ZDB-GENE-060503-754  | pdk4              |
| ENSDARG00000007344  | 220.6744697  | -0.684463953 | 0.622236982 | 1.607104736 | 0.229843027 | -2.977962667 | 0.002901713  | 0.060665592 | tcap              | ZDB-GENE-070501-5    | tcap              |
| ENSDARG00000069946  | 300.5415561  | -0.684857728 | 0.622067169 | 1.607543445 | 0.167944689 | -4.077876664 | 5.54489E-05  | 0.002409707 | itga6b            | ZDB-GENE-050320-5    | itga6b            |
| ENSDARG00000090903  | 94.82860882  | -0.685189675 | 0.621924055 | 1.607913364 | 0.218923769 | -3.12980942  | 0.001749197  | 0.042624814 | creb3l3b          | ZDB-GENE-131023-1    | creb3l3b          |
| ENSDARG00000027355  | 2505.201806  | -0.68737102  | 0.620984421 | 1.610346357 | 0.123707428 | -5.556424807 | 2.75356E-08  | 3.98898E-06 | slc25a4           | ZDB-GENE-030131-5275 | slc25a4           |
| ENSDARG00000020455  | 61.03755574  | -0.68841219  | 0.620536428 | 1.611508938 | 0.152820684 | -4.504705584 | 6.6465E-06   | 0.000473963 | si:ch211-171h4.3  | ZDB-GENE-081031-85   | si:ch211-171h4.3  |
| ENSDARG00000062271  | 16.58873165  | -0.688604966 | 0.620453516 | 1.611724286 | 0.247497554 | -2.782269787 | 0.005398015  | 0.094919836 | slc25a15b         | ZDB-GENE-060526-35   | slc25a15b         |
| ENSDARG00000024295  | 232.6705955  | -0.689499839 | 0.620068781 | 1.612724314 | 0.168198999 | -4.099310015 | 4.14384E-05  | 0.002222691 | slc11a2           | ZDB-GENE-021115-1    | slc11a2           |
| ENSDARG00000041400  | 165.0518084  | -0.690362219 | 0.619698242 | 1.613688619 | 0.218577114 | -3.158437806 | 0.001586172  | 0.039596178 | ndufa3            | ZDB-GENE-040801-18   | ndufa3            |
| ENSDARG00000008969  | 286.469989   | -0.693899858 | 0.618180539 | 1.617650406 | 0.174906152 | -3.967269591 | 7.27007E-05  | 0.00358592  | fgb               | ZDB-GENE-030131-9261 | fgb               |
| ENSDARG00000055642  | 34.63474836  | -0.696222281 | 0.617186204 | 1.620256566 | 0.209653284 | -3.320826978 | 0.008997512  | 0.025922163 | si:ch211-217a12.1 | ZDB-GENE-121214-95   | si:ch211-217a12.1 |
| ENSDARG00000020086  | 28.33893851  | -0.699360058 | 0.615845319 | 1.623784364 | 0.199665906 | -3.502651366 | 0.000460652  | 0.015870927 | nuak1a            | ZDB-GENE-041210-122  | nuak1a            |
| ENSDARG00000099776  | 551.4279428  | -0.700833987 | 0.615216462 | 1.625444152 | 0.213943659 | -3.275787603 | 0.001053678  | 0.028976924 | glula             | ZDB-GENE-030131-688  | glula             |
| ENSDARG00000042344  | 26.14367021  | -0.701453353 | 0.614952399 | 1.626142123 | 0.223484744 | -3.138708    | 0.001696945  | 0.041682758 | trmt6             | ZDB-GENE-051120-141  | trmt6             |
| ENSDARG000000103211 | 32.76911106  | -0.70263138  | 0.614450467 | 1.627470486 | 0.19337065  | -3.203432029 | 0.001358001  | 0.002592163 | si:dkey-19b23.8   | ZDB-GENE-030131-4634 | si:dkey-19b23.8   |
| ENSDARG00000020741  | 3294.027873  | -0.702859702 | 0.614353231 | 1.62772807  | 0.157062655 | -4.475027512 | 7.64015E-06  | 0.000528434 | fga               | ZDB-GENE-031010-21   | fga               |
| ENSDARG00000055523  | 163.2827773  | -0.703454191 | 0.614100128 | 1.628398944 | 0.191589754 | -3.671669168 | 0.000240971  | 0.009432752 | slc22a6l          | ZDB-GENE-040426-2249 | slc22a6l          |
| ENSDARG00000027088  | 149.8121211  | -0.704723653 | 0.613560004 | 1.629832442 | 0.227407836 | -3.098941818 | 0.001942132  | 0.045575684 | ptgdsb.1          | ZDB-GENE-030131-8436 | ptgdsb.1          |
| ENSDARG00000038106  | 1109.5873487 | -0.704920165 | 0.613476436 | 1.63005446  | 0.219202339 | -5.913643715 | 3.34621E-09  | 6.15636E-06 | slc37a4a          | ZDB-GENE-040426-2230 | slc37a4a          |
| ENSDARG00000005565  | 125.3793092  | -0.70505633  | 0.613418537 | 1.630208315 | 0.195419911 | -3.607904272 | 0.00030868   | 0.011519474 | entpd8            | ZDB-GENE-040724-142  | entpd8            |
| ENSDARG00000104227  | 89.22507342  | -0.710144788 | 0.61125879  | 1.635968293 | 0.169310404 | -4.194336395 | 2.73672E-05  | 0.001579367 | nop10             | ZDB-GENE-041007-4    | nop10             |
| ENSDARG00000096849  | 107.1919847  | -0.711216326 | 0.610804956 | 1.637183834 | 0.139268748 | -5.106790549 | 3.27677E-07  | 3.46471E-05 | si:dkey-16p21.8   | ZDB-GENE-131121-428  | si:dkey-16p21.8   |
| ENSDARG00000116806  | 229.9759762  | -0.711941439 | 0.610498037 | 1.638006906 | 0.179715083 | -3.961500758 | 7.44801E-05  | 0.003663866 | CJ693479.1        |                      |                   |
| ENSDARG00000034677  | 101.6277108  | -0.713985723 | 0.60963358  | 1.64032959  | 0.243529659 | -2.931822461 | 0.003369793  | 0.067756783 | scel              | ZDB-GENE-030616-15   | scel              |
| ENSDARG00000074547  | 3426.909792  | -0.714521569 | 0.609407192 | 1.640938954 | 0.226844941 | -3.149823685 | 0.00163369   | 0.040507592 | si:ch211-24019.8  | ZDB-GENE-041210-330  | si:ch211-24019.8  |
| ENSDARG00000002271  | 163.178792   | -0.719751323 | 0.607202096 | 1.646898135 | 0.153997818 | -4.673776105 | 2.95712E-06  | 0.000234504 | zfdand5b          | ZDB-GENE-040426-875  | zfdand5b          |
| ENSDARG00000095975  | 23.86613728  | -0.721771277 | 0.606352537 | 1.649205614 | 0.257542128 | -2.802536741 | 0.005070244  | 0.090040879 | wdr47b            | ZDB-GENE-111114-10   | wdr47b            |
| ENSDARG00000058371  | 7784.575101  | -0.72245596  | 0.606064834 | 1.649988489 | 0.146643262 | -4.926622261 | 8.36633E-07  | 7.54528E-05 | krt5              | ZDB-GENE-991110-23   | krt5              |
| ENSDARG00000114237  | 29.96788724  | -0.723824558 | 0.605490169 | 1.651554477 | 0.233609965 | -3.098431854 | 0.001945477  | 0.045596034 | bcl2l16           | ZDB-GENE-140619-1    | bcl2l16           |
| ENSDARG00000067851  | 57.08642536  | -0.73172797  | 0.602182226 | 1.660626896 | 0.200702323 | -3.645837081 | 0.000266523  | 0.010110281 | lcn15             | ZDB-GENE-060825-349  | lcn15             |
| ENSDARG00000041602  | 42.29408662  | -0.731992447 | 0.602071843 | 1.660931353 | 0.15025793  | -4.87157281  | 1.10713E-06  | 9.73241E-05 | zgc:92335         | ZDB-GENE-040718-152  | zgc:92335         |
| ENSDARG00000042904  | 331.8452996  | -0.732389412 | 0.601906202 | 1.66138843  | 0.128999524 | -5.677458271 | 1.36711E-08  | 2.11362E-06 | foxo3b            | ZDB-GENE-990708-6    | foxo3b            |
| ENSDARG00000069293  | 5280.442497  | -0.732760823 | 0.601751266 | 1.661816196 | 0.176445395 | -4.1529042   | 3.28282E-05  | 0.001835786 | ahsg2             | ZDB-GENE-030131-1133 | ahsg2             |
| ENSDARG00000041787  | 662.8261113  | -0.733060867 | 0.60162613  | 1.662161848 | 0.146731712 | -4.995926629 | 5.85539E-07  | 5.66987E-05 | cx32.3            | ZDB-GENE-030131-1337 | cx32.3            |
| ENSDARG00000062221  | 15.1448281   | -0.737707447 | 0.599691551 | 1.667523909 | 0.25987813  | -2.838666907 | 0.004530242  | 0.083347392 | arap1a            | ZDB-GENE-030131-6226 | arap1a            |
| ENSDARG00000095590  | 548.5963178  | -0.739344597 | 0.599011416 | 1.669417266 | 0.222973253 | -3.315844336 | 0.000913667  | 0.026291754 | spp2              | ZDB-GENE-090313-223  | spp2              |
| ENSDARG00000102020  | 111.5294555  | -0.739631775 | 0.598892191 | 1.669749607 | 0.171723563 | -4.307107076 | 1.65404E-05  | 0.001045737 | pnpla3            | ZDB-GENE-040718-27   | pnpla3            |
| ENSDARG00000060319  | 32.20234789  | -0.745410864 | 0.596497971 | 1.676451636 | 0.25643887  | -2.906777992 | 0.003651723  | 0.071396805 | scn4bb            | ZDB-GENE-031116-71   | scn4bb            |
| ENSDARG00000058322  | 77.48477465  | -0.745775947 | 0.596347043 | 1.676875927 | 0.13505987  | -5.521817454 | 3.35511E-08  | 4.71201E-06 | enc3              | ZDB-GENE-030131-5742 | enc3              |
| ENSDARG00000038583  | 150.7398641  | -0.748768633 | 0.595111279 | 1.680388002 | 0.181535762 | -4.124634303 | 3.171324E-05 | 0.002015228 | abraa             | ZDB-GENE-120730-1    | abraa             |
| ENSDARG00000018846  | 934.6861172  | -0.752512933 | 0.593568759 | 1.684724785 | 0.241774292 | -3.112460504 | 0.001855348  | 0.044330778 | dgat2             | ZDB-GENE-050913-15   | dgat2             |
| ENSDARG00000028088  | 21.87301197  | -0.752932059 | 0.593396343 | 1.685214295 | 0.241867154 | -3.11299838  | 0.00185197   | 0.044307608 | galk1             | ZDB-GENE-041010-79   | galk1             |
| ENSDARG00000005690  | 45.60867783  | -0.754284322 | 0.592840403 | 1.686794616 | 0.206378745 | -3.65485468  | 0.000257328  | 0.009883747 | slc25a23a         | ZDB-GENE-121214-154  | slc25a23a         |
| ENSDARG00000091592  | 33.32938653  | -0.755980655 | 0.592143746 | 1.687797913 | 0.257393804 | -2.937058485 | 0.003313416  | 0.066842357 | pel1a             | ZDB-GENE-110310-6    | pel1a             |
| ENSDARG00000104292  | 50.42321371  | -0.756197712 | 0.592054663 | 1.68903323  | 0.151685312 | -4.98530612  | 6.18638E-07  | 5.83677E-05 | ccn2b             | ZDB-GENE-070705-82   | ccn2b             |
| ENSDARG00000008363  | 185.2923196  | -0.757237583 | 0.591628074 | 1.690251096 | 0.135031437 | -5.607861407 | 2.04842E-08  | 3.06397E-06 | mcl1b             | ZDB-GENE-030825-1    | mcl1b             |
| ENSDARG00000036171  | 222.8250503  | -0.757990755 | 0.591319289 | 1.691133738 | 0.237676684 | -3.189167494 | 0.001426832  | 0.036898325 | rnasel3           | ZDB-GENE-050809-5    | rnasel3           |

|                    |              |              |             |              |             |              |             |             |                   |                      |                   |
|--------------------|--------------|--------------|-------------|--------------|-------------|--------------|-------------|-------------|-------------------|----------------------|-------------------|
| ENSDARG0000074390  | 95.81920218  | -0.7609833   | 0.590094002 | 1.694645254  | 0.177884418 | -4.27796493  | 1.8861E-05  | 0.001164444 | tmem176l.4        | ZDB-GENE-030131-3532 | tmem176l.4        |
| ENSDARG0000043009  | 158.7153387  | -0.764931996 | 0.588481107 | 1.699289897  | 0.122700271 | -6.234150817 | 4.54235E-10 | 9.83179E-08 | fam43a            | ZDB-GENE-030131-6098 | fam43a            |
| ENSDARG00000102335 | 45.75827611  | -0.766776106 | 0.587729368 | 1.701463386  | 0.222424623 | -3.447352613 | 0.000566109 | 0.018369095 | ano1              | ZDB-GENE-121127-3    | ano1              |
| ENSDARG0000054288  | 69.45280502  | -0.767471088 | 0.587446312 | 1.702283221  | 0.189346128 | -4.053270576 | 5.05065E-05 | 0.00267017  | zgc:63972         | ZDB-GENE-040426-1320 | zgc:63972         |
| ENSDARG0000043475  | 51.79636867  | -0.777854981 | 0.583233308 | 1.714579716  | 0.198277391 | -3.923064428 | 8.74298E-05 | 0.004210819 | TAGAP             | ZDB-GENE-121214-340  | si:ch211-122h15.4 |
| ENSDARG0000043475  | 51.79636867  | -0.777854981 | 0.583233308 | 1.714579716  | 0.198277391 | -3.923064428 | 8.74298E-05 | 0.004210819 | TAGAP             | ZDB-GENE-040724-50   | tagapb            |
| ENSDARG0000032631  | 16.52849318  | -0.778459409 | 0.582989009 | 1.715298203  | 0.271456636 | -2.867711837 | 0.004134519 | 0.077823368 | ltb4r             | ZDB-GENE-070705-164  | ltb4r             |
| ENSDARG0000040942  | 54.44525106  | -0.78063527  | 0.582110413 | 1.717887153  | 0.207895177 | -3.754946515 | 0.000173378 | 0.007313164 | pnp6              | ZDB-GENE-040426-1800 | pnp6              |
| ENSDARG0000057652  | 482.4642488  | -0.784803836 | 0.580430873 | 1.722858045  | 0.13288601  | -5.905842445 | 3.50849E-09 | 6.39101E-07 | dbpb              | ZDB-GENE-100922-6    | dbpb              |
| ENSDARG0000061858  | 792.69346191 | -0.786187547 | 0.57987444  | 1.724511257  | 0.211120652 | -3.723877983 | 0.000196186 | 0.007985455 | zgc:153968        | ZDB-GENE-061027-211  | zgc:153968        |
| ENSDARG00000114503 | 28.36675513  | -0.798690302 | 0.574870816 | 1.739521249  | 0.217275051 | -3.675941153 | 0.000236974 | 0.009335868 | phtf2             | ZDB-GENE-040711-4    | phtf2             |
| ENSDARG0000079973  | 11.79792071  | -0.801542011 | 0.573735618 | 1.742963081  | 0.282460389 | -2.837714744 | 0.004543777 | 0.08345386  | pus10             | ZDB-GENE-080204-5    | pus10             |
| ENSDARG0000016048  | 99.47624483  | -0.802517238 | 0.573347917 | 1.744141681  | 0.140029642 | -5.731052559 | 9.98093E-09 | 1.62504E-06 | gpat3             | ZDB-GENE-040718-436  | gpat3             |
| ENSDARG0000041294  | 44.08066646  | -0.807335416 | 0.571436298 | 1.749976339  | 0.247949575 | -3.256046785 | 0.001129751 | 0.030521535 | noxo1a            | ZDB-GENE-030131-9700 | noxo1a            |
| ENSDARG0000020427  | 63.99691727  | -0.810055201 | 0.570360034 | 1.753278526  | 0.270687128 | -2.992588554 | 0.002766224 | 0.058497689 | nkeh1a            | ZDB-GENE-040711-2    | nkeh1a            |
| ENSDARG00000104823 | 134.7464006  | -0.810073435 | 0.570352826 | 1.753300685  | 0.174184817 | -4.650654689 | 3.30883E-06 | 0.000259046 | znf648            | ZDB-GENE-120215-149  | znf648            |
| ENSDARG0000008170  | 18.23603077  | -0.812182858 | 0.569519499 | 1.755866133  | 0.235308629 | -3.451564274 | 0.000557347 | 0.018148796 | dbnla             | ZDB-GENE-040704-42   | dbnla             |
| ENSDARG0000019417  | 59.63933557  | -0.812947402 | 0.569217767 | 1.756796886  | 0.270639571 | -3.003800958 | 0.002666297 | 0.007985709 | gadd45ga          | ZDB-GENE-040426-1882 | gadd45ga          |
| ENSDARG00000104039 | 173.1613809  | -0.817013592 | 0.567615704 | 1.761755346  | 0.197284541 | -4.141295545 | 3.4535E-05  | 0.001890995 | errfi1a           | ZDB-GENE-030131-6256 | errfi1a           |
| ENSDARG0000060051  | 123.0987004  | -0.818552586 | 0.567010523 | 1.7636357    | 0.174837559 | -4.681789139 | 2.84382E-06 | 0.000229073 | slc47a2.1         | ZDB-GENE-070112-1472 | slc47a2.1         |
| ENSDARG00000103826 | 327.7713301  | -0.819174671 | 0.566766082 | 1.764396338  | 0.188597168 | -4.343515231 | 1.40221E-05 | 0.000902021 | gpib              | ZDB-GENE-020513-3    | gpib              |
| ENSDARG0000040944  | 40.08330755  | -0.821285401 | 0.565937484 | 1.76697962   | 0.247160279 | -3.144756175 | 0.001662253 | 0.041049841 | ntd5              | ZDB-GENE-031030-7    | ntd5              |
| ENSDARG0000031336  | 88.17168821  | -0.822994229 | 0.565267545 | 1.769073793  | 0.173871867 | -4.733337494 | 2.20858E-06 | 0.000182213 | hsd20b2           | ZDB-GENE-030804-21   | hsd20b2           |
| ENSDARG0000078425  | 356.4417681  | -0.825895573 | 0.564131901 | 1.772635084  | 0.199073725 | -4.148692022 | 3.3438E-05  | 0.001858589 | oat               | ZDB-GENE-110411-148  | oat               |
| ENSDARG0000004748  | 150.3984765  | -0.831082719 | 0.562107232 | 1.779019987  | 0.231425079 | -3.591152365 | 0.000329219 | 0.012113946 | zgc:100868        | ZDB-GENE-040801-33   | zgc:100868        |
| ENSDARG0000004745  | 93.97652074  | -0.831246133 | 0.562043566 | 1.779221507  | 0.151210483 | -5.497278477 | 3.85697E-08 | 5.3758E-06  | lmbri1            | ZDB-GENE-030131-9906 | lmbri1            |
| ENSDARG0000069540  | 26.33426923  | -0.833327893 | 0.56123314  | 1.781790717  | 0.178367244 | -4.671978292 | 2.98312E-06 | 0.000235552 | si:dkey-30c15.2   | ZDB-GENE-060503-543  | si:dkey-30c15.2   |
| ENSDARG0000057408  | 15.52405322  | -0.840716505 | 0.558366191 | 1.79093938   | 0.26757975  | -3.141928737 | 0.001678389 | 0.041337346 | CABZ01067232.1    |                      |                   |
| ENSDARG0000056795  | 72.3316185   | -0.847235686 | 0.555848765 | 1.799050503  | 0.180984833 | -4.681252406 | 2.85128E-06 | 0.000229073 | serpine1          | ZDB-GENE-070912-60   | serpine1          |
| ENSDARG0000023151  | 8015.287487  | -0.848777499 | 0.555255045 | 1.800974181  | 0.18138856  | -4.67933139  | 2.87809E-06 | 0.000229667 | ucp1              | ZDB-GENE-010503-1    | ucp1              |
| ENSDARG0000098103  | 134.5789462  | -0.849766809 | 0.554874416 | 1.8022096    | 0.149110373 | -5.698911413 | 1.20575E-08 | 1.87995E-06 | tefb              | ZDB-GENE-050522-224  | tefb              |
| ENSDARG0000010572  | 306.5762937  | -0.850131559 | 0.554734148 | 1.802665302  | 0.298196852 | -2.850907224 | 0.004359469 | 0.081185559 | slc25a25a         | ZDB-GENE-040426-2396 | slc25a25a         |
| ENSDARG0000069988  | 22.22764914  | -0.861708367 | 0.550300534 | 1.817188861  | 0.292959695 | -2.941388805 | 0.003267441 | 0.06620527  | arid6             | ZDB-GENE-070112-1882 | arid6             |
| ENSDARG0000099860  | 1211.850691  | -0.867090265 | 0.548251491 | 1.823980448  | 0.166973129 | -5.192992859 | 2.0694E-07  | 2.33576E-05 | pkmb              | ZDB-GENE-040801-230  | pkmb              |
| ENSDARG0000086685  | 94.94352214  | -0.867149326 | 0.548229047 | 1.82405512   | 0.145957191 | -5.941120947 | 2.8308E-09  | 5.3648E-07  | trim63b           | ZDB-GENE-040426-1003 | trim63b           |
| ENSDARG0000026500  | 18.10558618  | -0.867946755 | 0.547926105 | 1.825063618  | 0.257484875 | -3.370865003 | 0.000749326 | 0.022674496 | xkr9              | ZDB-GENE-060421-6224 | xkr9              |
| ENSDARG0000089245  | 33.38801193  | -0.869038661 | 0.547511563 | 1.826445444  | 0.196369099 | -4.425536734 | 9.62028E-06 | 0.000643614 | dusp23b           | ZDB-GENE-040718-163  | dusp23b           |
| ENSDARG0000093494  | 34.30948456  | -0.869885154 | 0.547190408 | 1.827517414  | 0.241897393 | -3.596091482 | 0.000323034 | 0.011934014 | si:ch211-217k17.9 | ZDB-GENE-061207-21   | si:ch211-217k17.9 |
| ENSDARG0000062182  | 60.40142809  | -0.870469066 | 0.546968985 | 1.828257228  | 0.19274088  | -4.516265904 | 6.29396E-06 | 0.000455438 | slc22a7b.3        | ZDB-GENE-131120-103  | slc22a7b.3        |
| ENSDARG0000028517  | 54.84244944  | -0.871550921 | 0.546558975 | 1.829628724  | 0.220492464 | -3.952746974 | 7.72591E-05 | 0.003770327 | hbp1              | ZDB-GENE-050522-414  | hbp1              |
| ENSDARG0000057392  | 14.06532524  | -0.872461899 | 0.546213963 | 1.830784394  | 0.282997346 | -3.082933154 | 0.002049712 | 0.04713825  | lrrc31            | ZDB-GENE-091204-286  | lrrc31            |
| ENSDARG0000086056  | 13.97916679  | -0.877954471 | 0.544138393 | 1.837767769  | 0.284686935 | -3.083929622 | 0.002042859 | 0.047039453 | plekhg6           | ZDB-GENE-030131-2517 | plekhg6           |
| ENSDARG0000055118  | 175.969061   | -0.879680511 | 0.543487775 | 1.83996779   | 0.175095564 | -5.024002273 | 5.06056E-07 | 4.95235E-05 | mylipb            | ZDB-GENE-061027-67   | mylipb            |
| ENSDARG00000101170 | 9.604498278  | -0.883073146 | 0.542211213 | 1.844299741  | 0.305165603 | -2.893750597 | 0.003806704 | 0.073412724 | rab42b            | ZDB-GENE-050417-172  | rab42b            |
| ENSDARG0000033160  | 498.1319466  | -0.889368267 | 0.539850458 | 1.852364825  | 0.154486901 | -5.756916996 | 8.5664E-09  | 1.41986E-06 | nr1d1             | ZDB-GENE-050105-1    | nr1d1             |
| ENSDARG0000018921  | 32.75222668  | -0.890392801 | 0.539467218 | 1.853680755  | 0.20827098  | -4.27516498  | 1.90996E-05 | 0.001175231 | fam84a            | ZDB-GENE-040426-1247 | fam84a            |
| ENSDARG00000101135 | 52.95969954  | -0.891130213 | 0.539191548 | 1.854628478  | 0.21337635  | -4.176330749 | 2.96249E-05 | 0.001687427 | si:dkey-85k7.7    | ZDB-GENE-040128-7    | si:dkey-85k7.7    |
| ENSDARG0000055342  | 77.25562655  | -0.892523253 | 0.538671166 | 1.856420139  | 0.207415475 | -4.303069731 | 1.68448E-05 | 0.001061337 | slc16a13          | ZDB-GENE-120907-2    | slc16a13          |
| ENSDARG00000018643 | 105.0784353  | -0.893910883 | 0.538153304 | 1.858206561  | 0.267281136 | -3.34445931  | 0.000824431 | 0.024229849 | igf2a             | ZDB-GENE-991111-3    | igf2a             |
| ENSDARG0000059646  | 107.7855135  | -0.89490059  | 0.53778425  | 1.859481752  | 0.142587505 | -6.276150142 | 3.47059E-10 | 7.78682E-08 | nt5dc2            | ZDB-GENE-060810-17   | nt5dc2            |
| ENSDARG000007693   | 252.6128494  | -0.895008253 | 0.537744119 | 1.859620523  | 0.164644272 | -5.436012099 | 5.44863E-08 | 7.37087E-06 | nfkbiab           | ZDB-GENE-030131-1819 | nfkbiab           |
| ENSDARG0000068708  | 207.9882285  | -0.898502482 | 0.536443271 | 1.86413001   | 0.128682941 | -6.982296754 | 2.90393E-12 | 8.90441E-10 | ifrd1             | ZDB-GENE-030131-6132 | ifrd1             |
| ENSDARG0000020876  | 263.3240618  | -0.898834284 | 0.53631991  | 1.864558787  | 0.289328267 | -3.106624509 | 0.001892366 | 0.044750321 | pdk2a             | ZDB-GENE-120910-1    | pdk2a             |
| ENSDARG0000035859  | 214.2492411  | -0.901300886 | 0.535403737 | 1.8677949383 | 0.17107464  | -5.26846578  | 1.37569E-07 | 1.62243E-05 | angptl4           | ZDB-GENE-041111-222  | angptl4           |

|                     |             |              |             |             |             |              |             |             |                   |                      |                   |
|---------------------|-------------|--------------|-------------|-------------|-------------|--------------|-------------|-------------|-------------------|----------------------|-------------------|
| ENS DARG00000104467 | 194.2807181 | -0.90171184  | 0.535251248 | 1.868281491 | 0.284073941 | -3.174215267 | 0.001502422 | 0.038284714 | bgllapl           |                      |                   |
| ENS DARG00000030872 | 116.6550391 | -0.906290549 | 0.533555204 | 1.87422031  | 0.301188852 | -3.009044136 | 0.00262071  | 0.056326904 | cetp              | ZDB-GENE-041114-54   | cetp              |
| ENS DARG00000101362 | 68.95832242 | -0.906866222 | 0.533342344 | 1.874968323 | 0.212253661 | -4.27255868  | 1.93243E-05 | 0.001181156 | mibp              | ZDB-GENE-030404-1    | mibp              |
| ENS DARG00000070672 | 32.65221985 | -0.908907714 | 0.532588169 | 1.877623383 | 0.236665043 | -3.84048148  | 0.000122793 | 0.005523594 | slc2a9l1          | ZDB-GENE-090915-3    | slc2a9l1          |
| ENS DARG00000104654 | 294.1699177 | -0.908937201 | 0.532577284 | 1.87766176  | 0.244457665 | -3.718178361 | 0.000200665 | 0.008130819 | leap2             | ZDB-GENE-081022-131  | leap2             |
| ENS DARG00000075564 | 132.6191954 | -0.914293786 | 0.530603543 | 1.884646292 | 0.174702597 | -5.233429844 | 1.66393E-07 | 1.92353E-05 | fam13a            | ZDB-GENE-050208-102  | fam13a            |
| ENS DARG00000016143 | 127.8139121 | -0.917382513 | 0.529468767 | 1.888685534 | 0.14606138  | -6.280801366 | 3.36832E-10 | 7.65067E-08 | xiap              | ZDB-GENE-030825-7    | xiap              |
| ENS DARG00000015890 | 153.5467796 | -0.918081832 | 0.529212179 | 1.889601261 | 0.191094544 | -4.804333054 | 1.55268E-06 | 0.000129259 | mafa              | ZDB-GENE-010605-2    | mafa              |
| ENS DARG00000036830 | 5601.453125 | -0.921611746 | 0.527918912 | 1.894230303 | 0.155164671 | -5.939572085 | 2.85767E-09 | 5.36484E-07 | krt91             | ZDB-GENE-040801-181  | krt91             |
| ENS DARG00000016391 | 16.12619533 | -0.923155357 | 0.527354367 | 1.896258118 | 0.317727544 | -2.905493636 | 0.003666743 | 0.071538429 | calccoco1b        | ZDB-GENE-031118-126  | calccoco1b        |
| ENS DARG00000012341 | 48.25166645 | -0.924538558 | 0.526849002 | 1.898077049 | 0.222083572 | -4.163020926 | 3.14065E-05 | 0.001777895 | capn9             | ZDB-GENE-010724-2    | capn9             |
| ENS DARG00000038429 | 130.2648377 | -0.926944261 | 0.52597121  | 1.901244746 | 0.152248107 | -6.088379536 | 1.14059E-09 | 2.33162E-07 | csrnp1b           | ZDB-GENE-030131-1515 | csrnp1b           |
| ENS DARG00000033614 | 118.464169  | -0.927125326 | 0.525905203 | 1.901483376 | 0.156038313 | -5.941651834 | 2.82164E-09 | 5.36484E-07 | rasgef1ba         | ZDB-GENE-030131-5783 | rasgef1ba         |
| ENS DARG00000057571 | 846.9048483 | -0.930395574 | 0.52471445  | 1.905798477 | 0.164143458 | -5.668185526 | 1.44318E-08 | 2.21236E-06 | pgam2             | ZDB-GENE-040116-6    | pgam2             |
| ENS DARG00000088143 | 28.23116915 | -0.934777522 | 0.523123134 | 1.911595825 | 0.252470895 | -3.702515972 | 0.000213472 | 0.008520345 | sema4gb           | ZDB-GENE-111117-1    | sema4gb           |
| ENS DARG00000055226 | 141.1960412 | -0.935754976 | 0.522768828 | 1.912891408 | 0.192665398 | -4.856891727 | 1.19243E-06 | 0.000102997 | slc7a7            | ZDB-GENE-051127-5    | slc7a7            |
| ENS DARG00000031426 | 25.39200654 | -0.939350032 | 0.521467761 | 1.917664091 | 0.215348268 | -4.362004119 | 1.28876E-05 | 0.000835496 | csrnp1a           | ZDB-GENE-070912-475  | csrnp1a           |
| ENS DARG00000009505 | 362.0432403 | -0.93946342  | 0.521452105 | 1.917814815 | 0.174697904 | -5.377645641 | 7.54662E-08 | 9.44508E-06 | prelid3b          | ZDB-GENE-031002-13   | prelid3b          |
| ENS DARG00000029695 | 65.0091519  | -0.939887146 | 0.521273655 | 1.918378168 | 0.273169909 | -3.440668667 | 0.000580279 | 0.018664277 | pgp               | ZDB-GENE-030131-6240 | pgp               |
| ENS DARG00000062780 | 43.00928468 | -0.940202001 | 0.521159904 | 1.918796883 | 0.229751121 | -4.092262961 | 4.27184E-05 | 0.002278066 | aifm3             | ZDB-GENE-140619-2    | aifm3             |
| ENS DARG00000076554 | 113.0467061 | -0.943598556 | 0.519934374 | 1.923319652 | 0.223046343 | -4.230504492 | 2.33168E-05 | 0.001385403 | cdkn1a            | ZDB-GENE-070705-7    | cdkn1a            |
| ENS DARG00000063509 | 166.7381863 | -0.943692022 | 0.519900691 | 1.92344426  | 0.193798477 | -3.497636832 | 0.0004694   | 0.01642091  | lrcc58b           | ZDB-GENE-050309-29   | lrcc58b           |
| ENS DARG00000086272 | 10.44936076 | -0.945345202 | 0.519305279 | 1.925649593 | 0.332448947 | -2.843580076 | 0.00446098  | 0.082320067 | si:dkey-4p15.5    | ZDB-GENE-121214-193  | si:dkey-4p15.5    |
| ENS DARG00000091252 | 25.29833442 | -0.94568025  | 0.519184691 | 1.926096853 | 0.291849981 | -3.24029574  | 0.001194058 | 0.031800253 | slc22a7b.2        | ZDB-GENE-030131-9391 | slc22a7b.2        |
| ENS DARG00000104470 | 89.02997551 | -0.947956593 | 0.518366147 | 1.929138326 | 0.170797824 | -5.550167869 | 2.85395E-08 | 4.10211E-06 | syngnr2b          | ZDB-GENE-070424-19   | syngnr2b          |
| ENS DARG00000074663 | 79.14999591 | -0.954291077 | 0.51609513  | 1.937627273 | 0.175349558 | -5.442221168 | 5.62603E-08 | 7.22469E-06 | SAMD8             | ZDB-GENE-070410-30   | zgc:162183        |
| ENS DARG00000039393 | 618.860793  | -0.957741179 | 0.5148624   | 1.942266516 | 0.262103382 | -3.654058843 | 0.000258127 | 0.009893795 | si:ch211-240l19.5 | ZDB-GENE-041210-327  | si:ch211-240l19.5 |
| ENS DARG00000005271 | 13.93412034 | -0.959400922 | 0.514270419 | 1.944502274 | 0.295245517 | -3.249502079 | 0.001156072 | 0.031056342 | zc3h12a           | ZDB-GENE-110411-6    | zc3h12a           |
| ENS DARG00000055518 | 760.7427117 | -0.965648946 | 0.512048033 | 1.952941787 | 0.200415878 | -4.818225763 | 1.4484E-06  | 0.000122801 | pygma             | ZDB-GENE-050522-482  | pygma             |
| ENS DARG00000020143 | 1015.74409  | -0.969872857 | 0.510551055 | 1.958667972 | 0.168219249 | -5.7655284   | 8.14024E-09 | 1.36149E-06 | pah               | ZDB-GENE-031006-2    | pah               |
| ENS DARG00000060797 | 110.737801  | -0.970575456 | 0.510302475 | 1.959622085 | 0.178529765 | -5.436490974 | 5.43401E-08 | 7.37087E-06 | pfkmb             | ZDB-GENE-081114-1    | pfkmb             |
| ENS DARG00000020761 | 198.9465446 | -0.971875422 | 0.509842865 | 1.961388633 | 0.181263009 | -5.361686462 | 8.24486E-08 | 1.02492E-05 | arrdc2            | ZDB-GENE-030131-7146 | arrdc2            |
| ENS DARG00000070542 | 73.1423772  | -0.97309292  | 0.509412787 | 1.963044558 | 0.194951691 | -4.991456687 | 5.99256E-07 | 5.75366E-05 | mafbb             | ZDB-GENE-010605-4    | mafbb             |
| ENS DARG00000011618 | 101.6020293 | -0.975243993 | 0.508653814 | 1.96597366  | 0.22748465  | -4.287076033 | 1.8104E-05  | 0.001121475 | slc26a2           | ZDB-GENE-030717-3    | slc26a2           |
| ENS DARG00000023176 | 338.43088   | -0.980410856 | 0.506835381 | 1.973027215 | 0.287460031 | -3.410598866 | 0.000648204 | 0.020316275 | tdo2b             | ZDB-GENE-030131-6014 | tdo2b             |
| ENS DARG00000037836 | 118.581727  | -0.982145432 | 0.506226371 | 1.975400844 | 0.261750053 | -3.752226292 | 0.000175271 | 0.007362188 | igfals            | ZDB-GENE-061009-25   | igfals            |
| ENS DARG00000044010 | 76.68547307 | -0.984097847 | 0.505541752 | 1.978075987 | 0.186075125 | -5.288712551 | 1.2318E-07  | 1.46442E-05 | lox12a            | ZDB-GENE-070818-1    | lox12a            |
| ENS DARG00000075282 | 139.543891  | -0.986480983 | 0.504707355 | 1.981346199 | 0.191709522 | -5.14570676  | 2.66515E-07 | 2.88432E-05 | irs2b             | ZDB-GENE-081104-462  | irs2b             |
| ENS DARG00000060435 | 17.50891289 | -0.988905975 | 0.503859717 | 1.984679398 | 0.252604709 | -3.914835866 | 9.04657E-05 | 0.004334345 | bnip1             | ZDB-GENE-060503-81   | bnip1             |
| ENS DARG00000089489 | 19.53608002 | -0.990737287 | 0.503220539 | 1.987200287 | 0.255001084 | -3.885227749 | 0.000102234 | 0.004765396 | fam83e            | ZDB-GENE-141215-21   | fam83e            |
| ENS DARG00000042807 | 134.0536702 | -0.998023817 | 0.500685362 | 1.997262304 | 0.169096919 | -5.903034627 | 3.56875E-09 | 6.42878E-07 | slc16a4           | ZDB-GENE-070112-602  | slc16a4           |
| ENS DARG00000037398 | 13.82232233 | -1.003977246 | 0.49862349  | 2.00552124  | 0.345317672 | -2.907401874 | 0.003644447 | 0.07133035  | zgc:113229        | ZDB-GENE-050417-475  | zgc:113229        |
| ENS DARG00000092364 | 15.19463606 | -1.02307749  | 0.49206558  | 2.0324944   | 0.261487941 | -3.912522649 | 9.1337E-05  | 0.004364721 | si:ch211-218c6.8  | ZDB-GENE-050419-103  | si:ch211-218c6.8  |
| ENS DARG00000069478 | 54.23750455 | -1.02361953  | 0.491880739 | 2.033013127 | 0.201832131 | -5.071638122 | 3.94406E-07 | 4.04227E-05 | slc13a3           | ZDB-GENE-040426-2486 | slc13a3           |
| ENS DARG00000038561 | 7.006851844 | -1.026633635 | 0.490854166 | 2.037264975 | 0.335538602 | -3.059658794 | 0.002215893 | 0.049475724 | klf6b             | ZDB-GENE-070912-633  | klf6b             |
| ENS DARG00000103398 | 761.3516238 | -1.027458356 | 0.490573648 | 2.038429916 | 0.231720318 | -4.434045164 | 9.24812E-06 | 0.00062554  | fabp1b.2          | ZDB-GENE-100318-6    | fabp1b.2          |
| ENS DARG00000033832 | 964.6956993 | -1.027464232 | 0.49057165  | 2.038338218 | 0.256272682 | -4.009261631 | 6.09089E-05 | 0.003104161 | ampd1             | ZDB-GENE-040426-1906 | ampd1             |
| ENS DARG00000100738 | 8.615721852 | -1.030104486 | 0.489674683 | 2.042172149 | 0.340816849 | -3.022457634 | 0.002507312 | 0.054333948 | osmr              | ZDB-GENE-060526-48   | osmr              |
| ENS DARG00000043093 | 84.99176064 | -1.031625181 | 0.489158806 | 2.044325866 | 0.278675688 | -3.701884393 | 0.000214004 | 0.008522182 | mpeg1.2           | ZDB-GENE-050522-305  | mpeg1.2           |
| ENS DARG00000002764 | 134.2816325 | -1.034060561 | 0.488333765 | 2.04777976  | 0.333851457 | -3.097367222 | 0.001952478 | 0.045675435 | miox              | ZDB-GENE-050913-113  | miox              |
| ENS DARG00000070914 | 314.0507767 | -1.034479036 | 0.488192137 | 2.048373835 | 0.133503443 | -7.748706822 | 9.28331E-15 | 5.50949E-12 | dusp6             | ZDB-GENE-030613-1    | dusp6             |
| ENS DARG00000100792 | 1075.127895 | -1.038080343 | 0.486975014 | 2.053493447 | 0.237949294 | -4.362611571 | 1.28519E-05 | 0.000835496 | zgc:154142        | ZDB-GENE-070615-2    | zgc:154142        |
| ENS DARG00000106212 | 45.93512782 | -1.039185197 | 0.486602219 | 2.055066668 | 0.309761841 | -3.354787642 | 0.000794259 | 0.023683603 | LO017965.1        |                      |                   |
| ENS DARG00000078552 | 38.71699933 | -1.042032682 | 0.485642746 | 2.059126813 | 0.249130195 | -4.182683205 | 2.88089E-05 | 0.00165117  | grhl3             | ZDB-GENE-030131-9854 | grhl3             |



|                      |             |              |             |              |             |              |             |             |                   |                      |                   |
|----------------------|-------------|--------------|-------------|--------------|-------------|--------------|-------------|-------------|-------------------|----------------------|-------------------|
| ENS DARG00000053961  | 42.8396183  | -1.044482219 | 0.484818878 | 2.062625952  | 0.232498536 | -4.492424936 | 7.04167E-06 | 0.000494762 | slc2a11a          | ZDB-GENE-080723-20   | slc2a11a          |
| ENS DARG00000068288  | 127.7181779 | -1.051626537 | 0.482423959 | 2.072865541  | 0.288665496 | -3.643062829 | 0.000269413 | 0.010198891 | lamc2             | ZDB-GENE-110222-3    | lamc2             |
| ENS DARG00000056885  | 289.2717808 | -1.053154884 | 0.481913164 | 2.075062635  | 0.15523165  | -6.784408237 | 1.16563E-11 | 3.15784E-09 | per1a             | ZDB-GENE-011220-1    | per1a             |
| ENS DARG00000079532  | 16.04273484 | -1.054203227 | 0.481563106 | 2.076571039  | 0.274488643 | -3.840607807 | 0.00012273  | 0.005523594 | zgc:194242        | ZDB-GENE-081022-84   | zgc:194242        |
| ENS DARG00000053853  | 2455.738839 | -1.055995656 | 0.480965176 | 2.07915261   | 0.240471209 | -4.391360028 | 1.12644E-05 | 0.00742803  | slc13a2           | ZDB-GENE-040426-2389 | slc13a2           |
| ENS DARG00000091260  | 132.01416   | -1.05988814  | 0.47966925  | 2.084769871  | 0.175385362 | -6.043196137 | 1.51091E-09 | 3.02149E-07 | mylk4a            | ZDB-GENE-120824-2    | mylk4a            |
| ENS DARG0000007086   | 193.6672324 | -1.061169461 | 0.479243423 | 2.08662227   | 0.219219483 | -4.840671304 | 1.29401E-06 | 0.000110731 | aqp10a            | ZDB-GENE-040718-40   | aqp10a            |
| ENS DARG00000057687  | 16.22314425 | -1.062336975 | 0.478855748 | 2.088311571  | 0.28335028  | -3.749200375 | 0.000177399 | 0.00741771  | sbk3              | ZDB-GENE-080204-39   | sbk3              |
| ENS DARG00000069498  | 13.38539347 | -1.064807186 | 0.478036543 | 2.091890283  | 0.256756397 | -4.147149593 | 3.3664E-05  | 0.001865514 | phkg1b            | ZDB-GENE-050522-52   | phkg1b            |
| ENS DARG00000041607  | 158.3568523 | -1.076344489 | 0.474228907 | 2.108686302  | 0.13373047  | -8.048610702 | 8.37391E-16 | 5.70605E-13 | eif4ebp3l         | ZDB-GENE-030826-26   | eif4ebp3l         |
| ENS DARG00000036848  | 112.7729195 | -1.091191848 | 0.469373453 | 2.1304997    | 0.20590592  | -5.299468079 | 1.16141E-07 | 1.40576E-05 | slc43a2a          | ZDB-GENE-040426-964  | slc43a2a          |
| ENS DARG00000032272  | 16.59558397 | -1.102846966 | 0.465596795 | 2.147781106  | 0.226455007 | -4.870048937 | 1.11571E-06 | 9.73241E-05 | sat1b             | ZDB-GENE-041001-39   | sat1b             |
| ENS DARG00000075517  | 16.24103125 | -1.11033946  | 0.463185033 | 2.158964408  | 0.3255413   | -3.410748378 | 0.000647848 | 0.020316275 | si:ch211-120k19.1 | ZDB-GENE-100922-282  | si:ch211-120k19.1 |
| ENS DARG00000056541  | 58.44362496 | -1.120750484 | 0.459854549 | 2.174600649  | 0.347553146 | -3.224688073 | 0.0012611   | 0.030398026 | nr0b1             | ZDB-GENE-070130-1    | nr0b1             |
| ENS DARG00000088813  | 81.85010095 | -1.120800401 | 0.459838638 | 2.174675892  | 0.222009529 | -5.048433759 | 4.45447E-07 | 4.4371E-05  | ppp1r3ab          | ZDB-GENE-050309-246  | ppp1r3ab          |
| ENS DARG00000043154  | 277.2062963 | -1.123871186 | 0.45886091  | 2.179309632  | 0.153618922 | -7.315968456 | 2.55532E-13 | 1.09332E-10 | ucp2              | ZDB-GENE-990708-8    | ucp2              |
| ENS DARG00000015611  | 34.07155095 | -1.129274691 | 0.457145495 | 2.187487376  | 0.208955907 | -5.404368357 | 6.50372E-08 | 8.54681E-06 | rasl11b           | ZDB-GENE-040426-793  | rasl11b           |
| ENS DARG000000102048 | 50.30115692 | -1.132412496 | 0.456152302 | 2.192250252  | 0.163581795 | -6.922607121 | 4.43409E-12 | 1.31577E-09 | slc25a43          | ZDB-GENE-030616-69   | slc25a43          |
| ENS DARG00000031248  | 6.35976199  | -1.14638544  | 0.451755653 | 2.213586023  | 0.376530072 | -3.044605267 | 0.002329859 | 0.051298568 | enkur             | ZDB-GENE-070718-1    | enkur             |
| ENS DARG000000100952 | 634.3897454 | -1.147775163 | 0.451320694 | 2.21571936   | 0.227277682 | -5.050100617 | 4.41577E-07 | 4.4371E-05  | wu:fj16a03        | ZDB-GENE-030131-7415 | wu:fj16a03        |
| ENS DARG00000020136  | 14.93633033 | -1.155561423 | 0.448891467 | 2.227709978  | 0.255901803 | -4.515643923 | 6.31247E-06 | 0.000455438 | ptges             | ZDB-GENE-050407-2    | ptges             |
| ENS DARG00000055412  | 43.67825506 | -1.156341339 | 0.448648563 | 2.228914596  | 0.223629597 | -5.170788466 | 2.33108E-07 | 2.5681E-05  | mylk4b            | ZDB-GENE-041001-128  | mylk4b            |
| ENS DARG00000017953  | 8.622598385 | -1.159755406 | 0.447588413 | 2.234195459  | 0.303509283 | -3.821152998 | 0.000132829 | 0.005832439 | tp73              | ZDB-GENE-030814-2    | tp73              |
| ENS DARG00000092778  | 66.00734491 | -1.160656881 | 0.447308822 | 2.235591944  | 0.299476792 | -3.875615445 | 0.000106356 | 0.004941235 | si:ch73-338o16.4  | ZDB-GENE-131119-14   | si:ch73-338o16.4  |
| ENS DARG00000058800  | 11.12724757 | -1.162931427 | 0.446604153 | 2.239119347  | 0.322730036 | -3.603418642 | 0.000314059 | 0.011672846 | rab25a            | ZDB-GENE-041212-69   | rab25a            |
| ENS DARG00000067741  | 231.8302681 | -1.165542808 | 0.445796499 | 2.243175983  | 0.139759338 | -8.33964174  | 7.45159E-17 | 6.52831E-14 | itpkcb            | ZDB-GENE-080225-27   | itpkcb            |
| ENS DARG00000088390  | 90.63326046 | -1.17372385  | 0.44327569  | 2.25593242   | 0.220666869 | -5.318985381 | 1.04348E-07 | 1.27138E-05 | nme4              | ZDB-GENE-040426-1043 | nme4              |
| ENS DARG00000113315  | 18.44130933 | -1.185595115 | 0.439643147 | 2.274572019  | 0.422868321 | -2.803698113 | 0.000502018 | 0.089890749 | zgc:153932        | ZDB-GENE-070209-223  | zgc:153932        |
| ENS DARG00000012366  | 48.00462376 | -1.189975672 | 0.438310252 | 2.281488959  | 0.201634825 | -5.901637638 | 3.59911E-09 | 6.42878E-07 | fbp2              | ZDB-GENE-040822-23   | fbp2              |
| ENS DARG00000099819  | 616.3743753 | -1.191204164 | 0.437937178 | 2.283432532  | 0.169765064 | -7.016780325 | 0.02979E-12 | 7.07977E-09 | sb:cb1058         | ZDB-GENE-040108-9    | sb:cb1058         |
| ENS DARG00000070222  | 5.95676069  | -1.191885281 | 0.43773047  | 2.284510829  | 0.360428802 | -3.306853599 | 0.000943502 | 0.026797518 | fam43b            | ZDB-GENE-040912-11   | fam43b            |
| ENS DARG00000014179  | 203.5803529 | -1.195860575 | 0.43652598  | 2.290814396  | 0.209567097 | -5.706337451 | 1.15433E-08 | 1.84424E-06 | pfkma             | ZDB-GENE-040912-135  | pfkma             |
| ENS DARG00000042737  | 68.3116666  | -1.197179053 | 0.436127222 | 2.292908927  | 0.231302389 | -5.175817926 | 2.26915E-07 | 2.53017E-05 | slc52a3           | ZDB-GENE-060421-4490 | slc52a3           |
| ENS DARG00000099819  | 26.75936947 | -1.19758758  | 0.436003091 | 2.2935583    | 0.335433238 | -3.570271056 | 0.000356612 | 0.012864604 | anxa3a            | ZDB-GENE-040112-58   | anxa3a            |
| ENS DARG00000037012  | 111.9606082 | -1.198757491 | 0.43565032  | 2.295418948  | 0.158296562 | -7.572858658 | 3.65099E-14 | 1.97562E-11 | slc3a2b           | ZDB-GENE-040122-2    | slc3a2b           |
| ENS DARG00000074526  | 38.01897527 | -1.208288921 | 0.432781603 | 2.310634262  | 0.414347948 | -2.916121411 | 0.003544126 | 0.070037403 | zbtb16b           | ZDB-GENE-100923-1    | zbtb16b           |
| ENS DARG00000031616  | 56.80693832 | -1.210189521 | 0.432211834 | 2.313680286  | 0.198413446 | -6.0993322   | 1.06513E-09 | 2.2057E-07  | g6pca.1           | ZDB-GENE-031001-4    | g6pca.1           |
| ENS DARG00000028017  | 83.36313864 | -1.211790526 | 0.431732461 | 2.316249276  | 0.350201497 | -3.460266549 | 0.000539641 | 0.017732747 | tp53inp1          | ZDB-GENE-031018-3    | tp53inp1          |
| ENS DARG00000078619  | 539.8285291 | -1.213597635 | 0.431192014 | 2.319152412  | 0.261951548 | -4.632908815 | 3.60563E-06 | 0.000277558 | pnp5a             | ZDB-GENE-040426-2553 | pnp5a             |
| ENS DARG00000011122  | 141.8906159 | -1.220033622 | 0.429272714 | 2.329521462  | 0.226344746 | -5.390156582 | 7.03963E-08 | 9.12079E-06 | pptc7a            | ZDB-GENE-041114-74   | pptc7a            |
| ENS DARG00000077473  | 172.0126919 | -1.220105973 | 0.429251186 | 2.329638291  | 0.200048509 | -6.099050582 | 1.067E-09   | 2.2057E-07  | mych              | ZDB-GENE-030219-51   | mych              |
| ENS DARG00000042138  | 7.298794441 | -1.226894731 | 0.427236043 | 2.340626489  | 0.386766842 | -3.172181783 | 0.001512983 | 0.038447314 | selp              | ZDB-GENE-110107-2    | selp              |
| ENS DARG00000070426  | 961.9570551 | -1.234789347 | 0.424904537 | 2.353469811  | 0.196945588 | -6.269697937 | 3.61749E-10 | 8.01863E-08 | chac1             | ZDB-GENE-030131-1957 | chac1             |
| ENS DARG00000069095  | 57.29527822 | -1.235083003 | 0.424818058 | 2.353948901  | 0.182052323 | -6.784219973 | 1.16715E-11 | 3.15784E-09 | gl52a             | ZDB-GENE-081105-57   | gl52a             |
| ENS DARG00000095434  | 14.43394992 | -1.235186958 | 0.424787448 | 2.354118524  | 0.390083653 | -3.166466854 | 0.001543029 | 0.038941911 | si:ch211-217k17.8 | ZDB-GENE-031010-46   | si:ch211-217k17.8 |
| ENS DARG00000019613  | 383.418124  | -1.240695137 | 0.423168711 | 2.363123677  | 0.11208142  | -11.06958796 | 1.76209E-28 | 6.48378E-25 | ip6k2b            | ZDB-GENE-040718-85   | ip6k2b            |
| ENS DARG00000059805  | 23.99176006 | -1.246216083 | 0.421552411 | 2.3721184271 | 0.340288016 | -3.66223912  | 0.00025002  | 0.009744055 | slc25a38a         | ZDB-GENE-060929-320  | slc25a38a         |
| ENS DARG00000040059  | 111.0650733 | -1.248271514 | 0.420952246 | 2.37556637   | 0.255813444 | -4.879616546 | 1.06292E-06 | 9.40176E-05 | gbp               | ZDB-GENE-990714-7    | gbp               |
| ENS DARG00000097613  | 37.21749671 | -1.249891959 | 0.420479696 | 2.378236121  | 0.341554725 | -3.659419313 | 0.000252787 | 0.009773553 | igfn1.3           | ZDB-GENE-131122-44   | igfn1.3           |
| ENS DARG00000007184  | 36.17916022 | -1.251179483 | 0.420104608 | 2.380359511  | 0.336390308 | -3.71942786  | 0.000199675 | 0.00810952  | zbtb16a           | ZDB-GENE-030131-1989 | zbtb16a           |
| ENS DARG0000000796   | 190.208288  | -1.253678862 | 0.419377434 | 2.384486908  | 0.202927986 | -6.177949571 | 6.49394E-10 | 1.37328E-07 | nr4a1             | ZDB-GENE-040704-11   | nr4a1             |
| ENS DARG0000014053   | 67.45986768 | -1.255576447 | 0.418826187 | 2.387625301  | 0.314277402 | -3.995121624 | 6.4661E-05  | 0.003250366 | olfm1b            | ZDB-GENE-040801-228  | olfm1b            |
| ENS DARG00000102029  | 4.087135747 | -1.267495255 | 0.415380313 | 2.407432345  | 0.447972863 | -2.829401866 | 0.00466351  | 0.085033951 | si:dkey-183c6.7   | ZDB-GENE-160728-81   | si:dkey-183c6.7   |
| ENS DARG00000013721  | 2181.888068 | -1.268452368 | 0.415104832 | 2.409030013  | 0.226569791 | -5.598506157 | 2.16207E-08 | 3.20788E-06 | g6pca.2           | ZDB-GENE-050309-17   | g6pca.2           |

|                      |             |              |             |             |             |              |             |             |                     |                      |                    |
|----------------------|-------------|--------------|-------------|-------------|-------------|--------------|-------------|-------------|---------------------|----------------------|--------------------|
| ENSDARG00000090526   | 15.45662955 | -1.273117918 | 0.413764588 | 2.416833217 | 0.365185676 | -3.486220853 | 0.000489896 | 0.016537823 | zgc:158404          | ZDB-GENE-070112-592  | zgc:158404         |
| ENS DARG00000045089  | 402.063567  | -1.274075959 | 0.413489913 | 2.418438681 | 0.429778873 | -2.964491834 | 0.003031833 | 0.062533253 | si:ch211-270n8.1    | ZDB-GENE-081107-34   | si:ch211-270n8.1   |
| ENS DARG00000104129  | 10.54542637 | -1.274783909 | 0.413287058 | 2.419625733 | 0.331196092 | -3.849030653 | 0.000118586 | 0.005400367 | si:dkey-23n7.10     | ZDB-GENE-141222-64   | si:dkey-23n7.10    |
| ENS DARG00000097082  | 25.23437228 | -1.280803185 | 0.411566315 | 2.429742091 | 0.229905759 | -5.570992175 | 2.53293E-08 | 3.69848E-06 | im:7152348          | ZDB-GENE-041111-308  | im:7152348         |
| ENS DARG00000033170  | 29.11207634 | -1.282461949 | 0.411093382 | 2.432537337 | 0.219730495 | -5.836522379 | 5.33016E-09 | 9.25135E-07 | sult2st1            | ZDB-GENE-030219-114  | sult2st1           |
| ENS DARG00000069046  | 233.8871875 | -1.283499152 | 0.410797939 | 2.434286801 | 0.272997718 | -4.701501395 | 2.58255E-06 | 0.000210238 | wu:fk65c09          | ZDB-GENE-030131-7018 | wu:fk65c09         |
| ENS DARG00000079345  | 64.74339167 | -1.286164294 | 0.410039758 | 2.438787901 | 0.267550737 | -4.807179034 | 1.53075E-06 | 0.000128012 | si:ch211-217k17.10  | ZDB-GENE-030131-8827 | si:ch211-217k17.10 |
| ENS DARG00000099517  | 448.5743415 | -1.287600343 | 0.40963181  | 2.441216663 | 0.171568528 | -7.50487491  | 6.14873E-14 | 2.82811E-11 | adssl1              | ZDB-GENE-040516-18   | adssl1             |
| ENS DARG00000040253  | 62.46944014 | -1.289506012 | 0.409091081 | 2.444443419 | 0.303471963 | -4.249176764 | 2.14558E-05 | 0.001294211 | onecutl             | ZDB-GENE-020531-1    | onecutl            |
| ENS DARG000000087303 | 376.4473634 | -1.290726295 | 0.408745203 | 2.446511892 | 0.192539745 | -6.703687561 | 2.03225E-11 | 5.34132E-09 | cebpd               | ZDB-GENE-020111-4    | cebpd              |
| ENS DARG00000059815  | 3.184477306 | -1.300663183 | 0.405939552 | 2.463420959 | 0.444924247 | -2.923336259 | 0.003463023 | 0.069102711 | oaz2b               | ZDB-GENE-070313-1    | oaz2b              |
| ENS DARG00000105498  | 9.376054523 | -1.305075095 | 0.404700042 | 2.47096589  | 0.283379532 | -4.605396467 | 4.11681E-06 | 0.000312979 | TSC22D3 (1 of many) | ZDB-GENE-160114-28   | si:ch211-220e11.3  |
| ENS DARG00000092999  | 6.772974892 | -1.307581424 | 0.403997585 | 2.475262319 | 0.465980417 | -2.806086643 | 0.005014721 | 0.089313485 | tnni4b.1            | ZDB-GENE-090312-198  | tnni4b.1           |
| ENS DARG00000069888  | 106.9338544 | -1.315066989 | 0.401906833 | 2.488138837 | 0.181617767 | -7.240849903 | 4.45882E-13 | 1.67415E-10 | clnda               | ZDB-GENE-010328-1    | clnda              |
| ENS DARG00000059054  | 263.9016056 | -1.318214236 | 0.401031027 | 2.493572649 | 0.253183194 | -5.206562937 | 1.9237E-07  | 2.18471E-05 | pdk2b               | ZDB-GENE-040426-939  | pdk2b              |
| ENS DARG00000042055  | 44.11375974 | -1.320879682 | 0.400290787 | 2.498183899 | 0.321994006 | -4.10218718  | 4.09263E-05 | 0.002201643 | fam129aa            | ZDB-GENE-041014-181  | fam129aa           |
| ENS DARG00000054160  | 28.76743761 | -1.324885484 | 0.399180878 | 2.50513002  | 0.299120005 | -4.42927742  | 9.45493E-06 | 0.000634861 | zgc:113625          | ZDB-GENE-050320-47   | zgc:113625         |
| ENS DARG00000103038  | 97.76709608 | -1.32947648  | 0.397912609 | 2.513114633 | 0.148596007 | -8.946919294 | 3.65541E-19 | 6.7423E-16  | pik3r3a             | ZDB-GENE-040426-1978 | pik3r3a            |
| ENS DARG00000079308  | 67.30386855 | -1.340866634 | 0.394783436 | 2.533034337 | 0.26870698  | -4.990069976 | 6.03574E-07 | 5.75366E-05 | tor3a               | ZDB-GENE-081104-165  | tor3a              |
| ENS DARG00000037099  | 84.99516129 | -1.350476741 | 0.392162437 | 2.549963756 | 0.410474    | -3.290042098 | 0.001001724 | 0.027958282 | irs2a               | ZDB-GENE-040426-975  | irs2a              |
| ENS DARG00000038398  | 15.00577126 | -1.35112056  | 0.391987469 | 2.551101959 | 0.263742611 | -5.122875499 | 3.00911E-07 | 3.2187E-05  | pmm1                | ZDB-GENE-180314-1    | pmm1               |
| ENS DARG00000059050  | 20.03372484 | -1.357398452 | 0.39028544  | 2.562227276 | 0.465293655 | -2.917294139 | 0.003598026 | 0.069849616 | si:dkey-7f3.14      | ZDB-GENE-100922-186  | si:dkey-7f3.14     |
| ENS DARG00000096738  | 6.256379796 | -1.36544534  | 0.388114613 | 2.576558484 | 0.468636302 | -2.913656781 | 0.003572224 | 0.070290673 | si:zfos-911d5.4     | ZDB-GENE-130603-14   | si:zfos-911d5.4    |
| ENS DARG00000018478  | 1006.943139 | -1.367781376 | 0.38748668  | 2.580733871 | 0.183380032 | -7.458725795 | 8.73632E-14 | 3.82692E-11 | agxtb               | ZDB-GENE-010302-3    | agxtb              |
| ENS DARG00000102058  | 18.07537253 | -1.379087296 | 0.384461944 | 2.601037675 | 0.229095406 | -6.019707349 | 1.74733E-09 | 3.4567E-07  | si:dkeyp-11e3.1     | ZDB-GENE-141222-55   | si:dkeyp-11e3.1    |
| ENS DARG00000075833  | 9.04494649  | -1.39073606  | 0.381370178 | 2.622124269 | 0.40938096  | -3.3971684   | 0.006808071 | 0.021053203 | lyve1a              | ZDB-GENE-031118-138  | lyve1a             |
| ENS DARG00000058206  | 105.0803145 | -1.390859861 | 0.381337453 | 2.62234929  | 0.482782603 | -2.880923741 | 0.003965116 | 0.075439708 | si:ch211-153b23.5   | ZDB-GENE-030131-9744 | si:ch211-153b23.5  |
| ENS DARG00000011665  | 2404.031379 | -1.392710357 | 0.380848638 | 2.625715045 | 0.171844198 | -8.104494499 | 5.29653E-16 | 3.75828E-13 | aldoaa              | ZDB-GENE-030131-8369 | aldoaa             |
| ENS DARG00000101164  | 12.35085099 | -1.393876597 | 0.380540894 | 2.627838468 | 0.457171562 | -3.048913608 | 0.002296705 | 0.050749147 | nansb               | ZDB-GENE-041114-125  | nansb              |
| ENS DARG00000056587  | 22.98020697 | -1.39486903  | 0.380279209 | 2.629646786 | 0.417007997 | -3.34494552  | 0.00822987  | 0.024229849 | cyp2r1              | ZDB-GENE-110114-1    | cyp2r1             |
| ENS DARG00000103952  | 4.256763655 | -1.425074417 | 0.372400156 | 2.685283514 | 0.513844007 | -2.773360002 | 0.005548071 | 0.097027951 | CABZ010543991.1     |                      |                    |
| ENS DARG00000040907  | 36.12543091 | -1.426002306 | 0.372160719 | 2.687011146 | 0.27977769  | -5.096912144 | 3.45238E-07 | 3.62954E-05 | gcgb                | ZDB-GENE-040712-2    | gcgb               |
| ENS DARG00000020114  | 151.9891844 | -1.426051371 | 0.372148062 | 2.687102532 | 0.195937348 | -7.278098768 | 3.38557E-13 | 1.35158E-10 | slc20a1a            | ZDB-GENE-040426-2217 | slc20a1a           |
| ENS DARG00000089216  | 24.75212234 | -1.429466904 | 0.371268056 | 2.693471695 | 0.406538125 | -2.878866359 | 0.003991074 | 0.075713136 | zmp:0000001268      | ZDB-GENE-140106-228  | zmp:0000001268     |
| ENS DARG00000054127  | 12.27241872 | -1.437694949 | 0.36915665  | 2.708877115 | 0.368692123 | -3.899445792 | 9.64131E-05 | 0.004559919 | slc26a6l            | ZDB-GENE-080220-10   | slc26a6l           |
| ENS DARG00000034181  | 79.02328018 | -1.440711658 | 0.368385541 | 2.714547367 | 0.222931356 | -6.462579716 | 1.02933E-10 | 2.49179E-08 | esr2b               | ZDB-GENE-030116-1    | esr2b              |
| ENS DARG00000041715  | 19.89667064 | -1.459067672 | 0.363728109 | 2.749306348 | 0.294913928 | -4.947435614 | 7.51976E-07 | 6.84893E-05 | bco2b               | ZDB-GENE-060421-7448 | bco2b              |
| ENS DARG00000061368  | 130.392681  | -1.493141948 | 0.355238057 | 2.815013708 | 0.176889805 | -8.441085368 | 3.14404E-17 | 3.21356E-14 | klf13               | ZDB-GENE-060929-1274 | klf13              |
| ENS DARG00000030604  | 41.90260072 | -1.493799462 | 0.355076193 | 2.816296954 | 0.205586894 | -7.266024758 | 3.70221E-13 | 1.41903E-10 | phkg1a              | ZDB-GENE-061103-385  | phkg1a             |
| ENS DARG00000096721  | 4.650601279 | -1.50996299  | 0.351120226 | 2.848027328 | 0.435094588 | -3.470424668 | 0.000519636 | 0.01731932  | si:rp71-1c10.11     | ZDB-GENE-130603-61   | si:rp71-1c10.11    |
| ENS DARG00000045051  | 26.51522229 | -1.521051884 | 0.348431779 | 2.870002283 | 0.366551142 | -4.149630737 | 3.33012E-05 | 0.001856593 | slc16a3             | ZDB-GENE-030131-5487 | slc16a3            |
| ENS DARG00000105494  | 31.86579948 | -1.524634055 | 0.347567706 | 2.87713727  | 0.356744071 | -4.273747429 | 1.92215E-05 | 0.001178789 | si:ch211-113d11.8   | ZDB-GENE-160113-48   | si:ch211-113d11.8  |
| ENS DARG00000098742  | 8.39629881  | -1.529957555 | 0.346287555 | 2.887773429 | 0.402866753 | -3.797676384 | 0.000146059 | 0.006352696 | lrltm1              | ZDB-GENE-161221-2    | lrltm1             |
| ENS DARG00000026771  | 89.17723123 | -1.557773059 | 0.339674999 | 2.943990588 | 0.176235786 | -8.839141546 | 9.64569E-19 | 1.61328E-15 | tmem41ab            | ZDB-GENE-040426-2050 | tmem41ab           |
| ENS DARG00000093936  | 165.5953377 | -1.568993777 | 0.337043387 | 2.966977069 | 0.289018335 | -5.428699805 | 5.67661E-08 | 7.62323E-06 | si:dkeyp-1h4.6      | ZDB-GENE-060503-841  | si:dkeyp-1h4.6     |
| ENS DARG00000088762  | 7.59543125  | -1.572305596 | 0.336270565 | 2.973795821 | 0.418655536 | -3.75560684  | 0.000172922 | 0.007313164 | si:ch211-224l0.4    | ZDB-GENE-090312-125  | si:ch211-224l0.4   |
| ENS DARG0000017665   | 121.8976364 | -1.580952315 | 0.334261172 | 2.991627623 | 0.187703301 | -8.422613286 | 3.68178E-17 | 3.56513E-14 | snrkb               | ZDB-GENE-040426-1724 | snrkb              |
| ENS DARG00000114141  | 19.20808389 | -1.593576372 | 0.331349036 | 3.017965621 | 0.425465412 | -3.745489828 | 0.000180042 | 0.007477236 | CABZ01083546.1      |                      |                    |
| ENS DARG00000059369  | 15.02781265 | -1.600760975 | 0.329703024 | 3.033032538 | 0.447902842 | -3.573902254 | 0.0003517   | 0.01276461  | si:ch1073-15f12.3   | ZDB-GENE-081104-69   | si:ch1073-15f12.3  |
| ENS DARG00000029039  | 3.671651556 | -1.612521364 | 0.327026315 | 3.057857897 | 0.50709889  | -3.179895273 | 0.001473283 | 0.003746341 | zdhhc23a            | ZDB-GENE-060526-38   | zdhhc23a           |
| ENS DARG00000113928  | 5.981808757 | -1.616260442 | 0.326179848 | 3.065793322 | 0.351760584 | -4.594774161 | 4.33218E-06 | 0.000327998 | B3GAT1              |                      |                    |
| ENS DARG00000102572  | 70.05706488 | -1.631004137 | 0.322863412 | 3.097284994 | 0.224027958 | -7.280359797 | 3.32931E-13 | 1.35158E-10 | si:ch211-260e23.9   | ZDB-GENE-141222-48   | si:ch211-260e23.9  |
| ENS DARG00000086856  | 56.76127004 | -1.651566254 | 0.318294415 | 3.141745359 | 0.189397553 | -8.720103427 | 2.77948E-18 | 3.65263E-15 | stk35               | ZDB-GENE-061103-553  | stk35              |
| ENS DARG00000046053  | 62.50326774 | -1.655868558 | 0.317346633 | 3.151128436 | 0.342507097 | -4.83455255  | 1.33445E-06 | 0.000113663 | slc27a6             | ZDB-GENE-060825-27   | slc27a6            |

|                    |             |              |             |             |             |              |             |             |                   |                      |                   |
|--------------------|-------------|--------------|-------------|-------------|-------------|--------------|-------------|-------------|-------------------|----------------------|-------------------|
| ENSDARG0000029075  | 97.61254822 | -1.660476727 | 0.316334601 | 3.161209672 | 0.169753139 | -9.781714438 | 1.34906E-22 | 3.35852E-19 | pkfkb4b           | ZDB-GENE-031031-4    | pkfkb4b           |
| ENSDARG0000069459  | 4.986634463 | -1.668568072 | 0.314565407 | 3.178989105 | 0.446217805 | -3.739357892 | 0.000184491 | 0.007644738 | si:dkey-6n21.13   | ZDB-GENE-160728-54   | si:dkey-6n21.13   |
| ENSDARG0000091860  | 9.717906297 | -1.670347267 | 0.31417771  | 3.182911993 | 0.354196411 | -4.715878581 | 2.4067E-06  | 0.000196793 | zgc:194007        | ZDB-GENE-081022-49   | zgc:194007        |
| ENSDARG0000075666  | 286.2778819 | -1.678351809 | 0.312439376 | 3.200620908 | 0.24932568  | -6.731564146 | 1.67849E-11 | 4.47548E-09 | tsc22d3           | ZDB-GENE-040426-1433 | tsc22d3           |
| ENSDARG0000007682  | 75.4870963  | -1.678458762 | 0.312416215 | 3.20085819  | 0.22190975  | -7.563699946 | 3.91763E-14 | 2.05933E-11 | ppdpfa            | ZDB-GENE-030219-204  | ppdpfa            |
| ENSDARG0000059370  | 15.09744251 | -1.684500552 | 0.311110598 | 3.214291012 | 0.398723564 | -4.224732882 | 2.39224E-05 | 0.001415193 | nr1d4b            | ZDB-GENE-080403-6    | nr1d4b            |
| ENSDARG0000021250  | 53.92396603 | -1.687520153 | 0.310460116 | 3.221025658 | 0.33816327  | -4.990252644 | 6.03004E-07 | 5.75366E-05 | slc25a48          | ZDB-GENE-040718-60   | slc25a48          |
| ENSDARG00000102435 | 18.71855072 | -1.694842108 | 0.308888463 | 3.237414537 | 0.321900052 | -5.265119091 | 1.40099E-07 | 1.64174E-05 | plekhf1           | ZDB-GENE-040426-1289 | plekhf1           |
| ENSDARG0000069715  | 5.073845583 | -1.700160419 | 0.307751881 | 3.249370876 | 0.593738541 | -2.863483336 | 0.004190109 | 0.078582688 | foxi2             | ZDB-GENE-031126-2    | foxi2             |
| ENSDARG0000096933  | 3.426671449 | -1.702518307 | 0.307249314 | 3.254685871 | 0.537602636 | -3.166871203 | 0.001540885 | 0.038941224 | si:ch211-135n15.2 | ZDB-GENE-131121-526  | si:ch211-135n15.2 |
| ENSDARG0000056804  | 43.74488491 | -1.706932251 | 0.306310717 | 3.264658873 | 0.614116599 | -2.779492124 | 0.005444397 | 0.095578266 | si:dkey-40g16.6   | ZDB-GENE-030131-9110 | si:dkey-40g16.6   |
| ENSDARG0000071223  | 46.20858825 | -1.72218185  | 0.303089998 | 3.299350047 | 0.51980025  | -3.31316087  | 0.000922479 | 0.026435778 | zgc:158445        | ZDB-GENE-061215-78   | zgc:158445        |
| ENSDARG0000087289  | 7.720179158 | -1.722240932 | 0.303077586 | 3.299485166 | 0.401360487 | -4.291007682 | 1.77864E-05 | 0.001105522 | zgc:66473         | ZDB-GENE-030131-5708 | zgc:66473         |
| ENSDARG0000001975  | 289.4978447 | -1.758829105 | 0.295487887 | 3.384233482 | 0.154499037 | -11.3840781  | 5.01963E-30 | 2.30878E-26 | hsd11b2           | ZDB-GENE-030131-6030 | hsd11b2           |
| ENSDARG0000099839  | 20.45024264 | -1.767335186 | 0.293750826 | 3.404245746 | 0.640206973 | -2.760568475 | 0.005770086 | 0.099585406 | si:ch211-9d9.1    | ZDB-GENE-030131-2657 | si:ch211-9d9.1    |
| ENSDARG0000098761  | 25.45616945 | -1.77747186  | 0.291694106 | 3.428248907 | 0.309277129 | -5.747181719 | 9.07432E-09 | 1.49062E-06 | rgs2              | ZDB-GENE-040718-410  | rgs2              |
| ENSDARG0000092052  | 26.05752373 | -1.786025795 | 0.289969729 | 3.448635841 | 0.461453198 | -3.870437569 | 0.00010864  | 0.005022015 | gstk4             | ZDB-GENE-060421-6530 | gstk4             |
| ENSDARG0000038199  | 86.90061253 | -1.794178061 | 0.288330812 | 3.468178278 | 0.288330812 | -6.055460063 | 1.40017E-09 | 2.8308E-07  | cdab              | ZDB-GENE-040426-1911 | cdab              |
| ENSDARG0000077169  | 33.60946535 | -1.810940996 | 0.285004974 | 3.50871069  | 0.554348529 | -3.26679138  | 0.001087738 | 0.029690365 | si:ch211-153b23.4 | ZDB-GENE-030131-7332 | si:ch211-153b23.4 |
| ENSDARG0000092580  | 86.57705116 | -1.816200966 | 0.283967757 | 3.521526565 | 0.592794503 | -3.063795223 | 0.002185485 | 0.049063019 | si:ch211-95j8.3   | ZDB-GENE-091204-307  | si:ch211-95j8.3   |
| ENSDARG0000097205  | 244.3177908 | -1.818746675 | 0.283467123 | 3.527445964 | 0.186086037 | -9.773686965 | 1.46039E-22 | 3.35852E-19 | ulk2              | ZDB-GENE-090218-30   | ulk2              |
| ENSDARG0000021688  | 29.28319022 | -1.824174492 | 0.282402645 | 3.541073317 | 0.654005623 | -2.789233652 | 0.005283293 | 0.093737309 | mxs               | ZDB-GENE-030721-5    | mxs               |
| ENSDARG0000069615  | 423.9524308 | -1.826753147 | 0.281898333 | 3.547378192 | 0.233894917 | -7.810144702 | 5.71224E-15 | 3.50312E-12 | ckmt2a            | ZDB-GENE-030131-5717 | ckmt2a            |
| ENSDARG0000027744  | 167.5747259 | -1.829506826 | 0.281360786 | 3.554155557 | 0.292221646 | -6.260682096 | 3.83297E-10 | 8.39512E-08 | gadd45ba          | ZDB-GENE-040426-1971 | gadd45ba          |
| ENSDARG00000106630 | 11.83782273 | -1.836121458 | 0.280073724 | 3.570488467 | 0.348851978 | -5.263325348 | 1.41473E-07 | 1.64735E-05 | LO018627.1        |                      |                   |
| ENSDARG00000087188 | 458.710279  | -1.846744418 | 0.278019038 | 3.596875984 | 0.239557554 | -7.708980118 | 2.6827E-14  | 7.07081E-12 | nfil3-6           | ZDB-GENE-040704-63   | nfil3-6           |
| ENSDARG0000033140  | 19.26124149 | -1.848385394 | 0.277702988 | 3.600969535 | 0.268306756 | -6.889075109 | 5.61563E-12 | 1.63994E-09 | desi1a            | ZDB-GENE-040426-1657 | desi1a            |
| ENSDARG0000025428  | 76.81668131 | -1.851972473 | 0.277013372 | 3.60993403  | 0.337738779 | -5.483446346 | 4.17119E-08 | 5.77004E-06 | socs3a            | ZDB-GENE-030131-7349 | socs3a            |
| ENSDARG0000041433  | 553.2621876 | -1.863687536 | 0.274773059 | 3.639366984 | 0.286226983 | -6.511222369 | 7.45417E-11 | 1.85327E-08 | si:dkey-7c18.24   | ZDB-GENE-041014-63   | si:dkey-7c18.24   |
| ENSDARG0000093844  | 4462.054517 | -1.872819364 | 0.273039321 | 3.662476149 | 0.321641599 | -5.822690137 | 5.79079E-09 | 9.9569E-07  | zgc:136461        | ZDB-GENE-060519-7    | zgc:136461        |
| ENSDARG0000054835  | 23.71175891 | -1.873899704 | 0.272834936 | 3.665219765 | 0.273894807 | -6.841676645 | 7.82716E-12 | 2.18188E-09 | ugt5f1            | ZDB-GENE-100406-6    | ugt5f1            |
| ENSDARG0000058673  | 10.70116894 | -1.875742262 | 0.272486704 | 3.669903842 | 0.596800192 | -3.142998759 | 0.001672265 | 0.041241743 | nkl.2             | ZDB-GENE-150806-1    | nkl.2             |
| ENSDARG0000058673  | 10.70116894 | -1.875742262 | 0.272486704 | 3.669903842 | 0.596800192 | -3.142998759 | 0.001672265 | 0.041241743 | nkl.2             | ZDB-GENE-131121-525  | nkl.1             |
| ENSDARG00000103199 | 120.8989847 | -1.902473595 | 0.267848433 | 3.738536438 | 0.224266693 | -8.483085792 | 2.19299E-17 | 2.37333E-11 | si:dkey-247k7.2   | ZDB-GENE-031118-45   | si:dkey-247k7.2   |
| ENSDARG0000076269  | 6.143505934 | -1.903241406 | 0.267342034 | 3.740526639 | 0.496058587 | -3.83672706  | 0.000124685 | 0.005577773 | zgc:172131        | ZDB-GENE-080204-47   | zgc:172131        |
| ENSDARG0000097959  | 167.2246746 | -1.906320187 | 0.266772121 | 3.748517628 | 0.290595851 | -6.560039237 | 5.37936E-11 | 1.35575E-08 | si:dkey-248g15.3  | ZDB-GENE-131127-95   | si:dkey-248g15.3  |
| ENSDARG0000036767  | 7.024015957 | -1.9345609   | 0.261600844 | 3.822617638 | 0.462361054 | -4.184091379 | 2.86309E-05 | 0.001646097 | urgcp             | ZDB-GENE-120215-160  | urgcp             |
| ENSDARG0000031588  | 291.2902907 | -1.937555702 | 0.261058366 | 3.830561016 | 0.339702585 | -5.703682536 | 1.17246E-08 | 1.84424E-06 | si:dkey-239b22.1  | ZDB-GENE-131119-12   | si:dkey-239b22.1  |
| ENSDARG0000069559  | 93.96355756 | -1.942999004 | 0.260075246 | 3.845041059 | 0.25886879  | -7.505729064 | 6.10876E-14 | 2.82811E-11 | muc13a            | ZDB-GENE-061207-26   | muc13a            |
| ENSDARG0000013522  | 2580.434149 | -1.948541306 | 0.25907805  | 3.859840698 | 0.392544883 | -4.963868828 | 6.91026E-07 | 6.38869E-05 | pck1              | ZDB-GENE-030909-11   | pck1              |
| ENSDARG0000089885  | 53.83462165 | -1.948776032 | 0.259035901 | 3.860468743 | 0.27234064  | -7.15565637  | 8.32735E-13 | 2.89069E-10 | slc16a12b         | ZDB-GENE-050522-80   | slc16a12b         |
| ENSDARG0000042186  | 1399.125335 | -1.976870321 | 0.25404037  | 3.936382244 | 0.614170436 | -3.218765027 | 0.001287439 | 0.033741182 | paplnb            | ZDB-GENE-030131-6023 | paplnb            |
| ENSDARG0000090468  | 48.83622291 | -1.977182318 | 0.253985437 | 3.937233617 | 0.264393421 | -7.478182727 | 7.53574E-14 | 3.38152E-11 | ppp1r3aa          | ZDB-GENE-110914-122  | ppp1r3aa          |
| ENSDARG0000096712  | 145.2698687 | -1.997204636 | 0.250484869 | 3.992257109 | 0.242086729 | -8.249955061 | 1.58454E-16 | 1.2675E-13  | si:dkey-193p11.2  | ZDB-GENE-030131-8407 | si:dkey-193p11.2  |
| ENSDARG0000020239  | 299.4418007 | -2.05608331  | 0.240467977 | 4.158557874 | 0.257132497 | -7.996201708 | 1.28316E-15 | 8.43128E-13 | lpin1             | ZDB-GENE-080722-2    | lpin1             |
| ENSDARG0000097080  | 12.98756482 | -2.058157865 | 0.24012244  | 4.164542064 | 0.50877474  | -4.045322421 | 5.22512E-05 | 0.002731014 | si:ch73-181m17.1  | ZDB-GENE-131122-49   | si:ch73-181m17.1  |
| ENSDARG0000052731  | 13.88585863 | -2.06093421  | 0.239660578 | 4.172564091 | 0.443729288 | -4.644575571 | 3.40776E-06 | 0.00026454  | ankrd31           | ZDB-GENE-050417-473  | ankrd31           |
| ENSDARG0000095615  | 31.66633725 | -2.061650509 | 0.239541826 | 4.174636287 | 0.296441882 | -6.954653285 | 3.5343E-12  | 1.06597E-09 | si:dkeyp-86h10.3  | ZDB-GENE-100922-65   | si:dkeyp-86h10.3  |
| ENSDARG0000045039  | 4.37425518  | -2.078969104 | 0.236683476 | 4.22505202  | 0.551253537 | -3.771348324 | 0.000162368 | 0.006947078 | kcj16             | ZDB-GENE-130603-81   | kcj16             |
| ENSDARG0000040433  | 25.61362374 | -2.085058095 | 0.235686643 | 4.242921819 | 0.755077256 | -2.761383792 | 0.0057557   | 0.099585406 | cyp2k22           | ZDB-GENE-040426-822  | cyp2k22           |
| ENSDARG00000100826 | 254.3471364 | -2.09148553  | 0.234638957 | 4.261866876 | 0.168394507 | -12.42015295 | 2.03173E-35 | 1.86899E-31 | hif1al            | ZDB-GENE-040426-1315 | hif1al            |
| ENSDARG0000035719  | 47.81105902 | -2.09435337  | 0.234172997 | 4.270347193 | 0.336638313 | -6.221375543 | 4.92815E-10 | 1.05428E-07 | arl5c             | ZDB-GENE-040426-1866 | arl5c             |
| ENSDARG0000097157  | 43.78462094 | -2.116017807 | 0.230682776 | 4.334957374 | 0.300926532 | -7.031675788 | 2.04068E-12 | 6.58342E-10 | si:ch211-207n23.2 | ZDB-GENE-131121-310  | si:ch211-207n23.2 |
| ENSDARG0000076520  | 26.53038433 | -2.149907262 | 0.225327099 | 4.437992601 | 0.304211297 | -7.067151289 | 1.58147E-12 | 5.19568E-10 | maf1b             | ZDB-GENE-141211-38   | maf1b             |

|                    |             |              |              |              |             |              |             |             |                   |                      |                   |
|--------------------|-------------|--------------|--------------|--------------|-------------|--------------|-------------|-------------|-------------------|----------------------|-------------------|
| ENSDARG00000100352 | 115.3934128 | -2.180494222 | 0.220600166  | 4.533088167  | 0.269058689 | -8.104158353 | 5.31119E-16 | 3.75828E-13 | aglb              | ZDB-GENE-050309-54   | aglb              |
| ENSARG00000101642  | 440.5745015 | -2.233162403 | 0.212691988  | 4.701634544  | 0.480712857 | -4.64552252  | 3.39217E-06 | 0.000264445 | si:ch211-155m12.1 | ZDB-GENE-060526-51   | si:ch211-155m12.1 |
| ENSARG00000077236  | 83.05563514 | -2.255272292 | 0.209457247  | 4.774243971  | 0.268901978 | -8.386968034 | 4.98841E-17 | 4.58883E-14 | hspb6             | ZDB-GENE-080214-7    | hspb6             |
| ENSARG00000104576  | 178.9488895 | -2.263796294 | 0.208223341  | 4.802535553  | 0.356827059 | -6.344239428 | 2.23527E-10 | 5.20563E-08 | si:ch211-152c8.5  | ZDB-GENE-030131-5764 | si:ch211-152c8.5  |
| ENSARG00000058685  | 5.467235847 | -2.271783528 | 0.207073734  | 4.829197704  | 0.540376083 | -4.204078603 | 2.62148E-05 | 0.00153111  | si:dkey-204a24.11 | ZDB-GENE-120215-129  | si:dkey-204a24.11 |
| ENSARG00000092122  | 6.681230241 | -2.27202488  | 0.207039095  | 4.83000566   | 0.404938881 | -5.610791631 | 2.01403E-08 | 3.03723E-06 | si:ch211-229n2.6  | ZDB-GENE-081105-166  | si:ch211-229n2.6  |
| ENSARG00000116430  | 5.118997162 | -2.276873628 | 0.206344426  | 4.846266116  | 0.548146923 | -4.153765229 | 3.27049E-05 | 0.001834464 | si:ch73-329n5.2   | ZDB-GENE-131121-66   | si:ch73-329n5.2   |
| ENSARG00000091209  | 71.94187003 | -2.313460236 | 0.2011177346 | 4.970738595  | 0.317981922 | -7.275445792 | 3.45278E-13 | 1.35158E-10 | ucp3              | ZDB-GENE-040426-1317 | ucp3              |
| ENSARG00000042667  | 576.2979129 | -2.326565098 | 0.199358207  | 5.016096481  | 0.268364027 | -8.669437285 | 4.34261E-18 | 5.32636E-15 | klf2a             | ZDB-GENE-011109-1    | klf2a             |
| ENSARG00000075598  | 345.5087381 | -2.32679304  | 0.199326711  | 5.016889076  | 0.66702939  | -3.488291636 | 0.000486118 | 0.01646597  | ambn              | ZDB-GENE-090313-258  | ambn              |
| ENSARG00000035632  | 22.98810123 | -2.335701598 | 0.198099673  | 5.047963918  | 0.759257119 | -3.076298582 | 0.002095879 | 0.047841158 | ccl19a.2          | ZDB-GENE-081022-55   | ccl19a.2          |
| ENSARG00000062788  | 33.96279158 | -2.348891749 | 0.196296758  | 5.094327641  | 0.663965188 | -3.537673046 | 0.00040367  | 0.014173116 | irg1l             | ZDB-GENE-061103-301  | irg1l             |
| ENSARG00000104919  | 20.88426764 | -2.387764869 | 0.191078205  | 5.233459264  | 0.726006821 | -3.288901425 | 0.001005792 | 0.027958282 | si:ch211-153b23.3 | ZDB-GENE-141216-408  | si:ch211-153b23.3 |
| ENSARG00000097539  | 25.71138722 | -2.401766906 | 0.189232671  | 5.284499744  | 0.527284866 | -4.554970301 | 5.2393E-06  | 0.000387567 | si:ch211-39f2.3   | ZDB-GENE-131126-52   | si:ch211-39f2.3   |
| ENSARG00000059824  | 39.90990609 | -2.424730813 | 0.18624443   | 5.369288084  | 0.486984293 | -4.97907396  | 6.38892E-07 | 5.99711E-05 | soat2             | ZDB-GENE-061013-742  | soat2             |
| ENSARG00000093418  | 3.85973019  | -2.44551282  | 0.183580812  | 5.44719238   | 0.654351223 | -3.737309158 | 0.000186    | 0.007689958 | si:dkey-216e24.9  | ZDB-GENE-070912-441  | si:dkey-216e24.9  |
| ENSARG00000105039  | 26.6577159  | -2.478623331 | 0.179415529  | 5.573653556  | 0.352612141 | -7.029319301 | 2.07544E-12 | 6.58342E-10 | phka1b            | ZDB-GENE-091204-81   | phka1b            |
| ENSARG00000097559  | 8.300124602 | -2.522807491 | 0.174004016  | 5.7168993794 | 0.625267794 | -4.034763208 | 5.46574E-05 | 0.002819274 | cyp8b3            | ZDB-GENE-040912-153  | cyp8b3            |
| ENSARG00000037618  | 102.7295178 | -2.603332533 | 0.164557931  | 6.076887286  | 0.44298103  | -5.876848791 | 4.1815E-09  | 7.32678E-07 | ddit4             | ZDB-GENE-031002-35   | ddit4             |
| ENSARG00000012609  | 2780.628526 | -2.688456467 | 0.155129346  | 6.446233587  | 0.341216303 | -7.87903874  | 3.29909E-15 | 2.09299E-12 | hpx a             |                      |                   |
| ENSARG00000018621  | 310.8632036 | -2.720727905 | 0.151697803  | 6.592053288  | 0.311606952 | -8.731281137 | 2.51804E-18 | 3.56361E-15 | slc6a19a.1        | ZDB-GENE-070620-2    | slc6a19a.1        |
| ENSARG00000036833  | 38.0507555  | -2.760725445 | 0.147549877  | 6.777369576  | 0.512375355 | -5.388091797 | 7.12097E-08 | 9.16165E-06 | upp2              | ZDB-GENE-040426-830  | upp2              |
| ENSARG00000109626  | 24.11569778 | -2.761934187 | 0.147426299  | 6.78305028   | 0.322382956 | -8.567246298 | 1.05989E-17 | 1.21874E-14 | si:ch211-226h7.3  | ZDB-GENE-130531-9    | si:ch211-226h7.3  |
| ENSARG00000092551  | 5.668152371 | -2.914900156 | 0.132595144  | 7.541754332  | 0.668784556 | -4.358503993 | 1.30955E-05 | 0.000845369 | si:dkey-56e3.2    | ZDB-GENE-090313-316  | si:dkey-56e3.2    |
| ENSARG00000002293  | 3.556198957 | -2.935725624 | 0.130694866  | 7.651409959  | 0.741520563 | -3.959061651 | 7.52448E-05 | 0.003691611 | si:ch211-197g15.6 | ZDB-GENE-050208-457  | si:ch211-197g15.6 |
| ENSARG00000003820  | 236.1325412 | -3.004203426 | 0.124636331  | 8.023342734  | 0.388660647 | -7.729631096 | 1.07859E-14 | 6.2012E-12  | nr1d2a            | ZDB-GENE-040504-1    | nr1d2a            |
| ENSARG00000069377  | 27.32945936 | -3.120641121 | 0.114972352  | 8.697743243  | 0.414765312 | -7.523872009 | 5.31774E-14 | 2.57463E-11 | si:dkey-242g16.2  | ZDB-GENE-030131-8324 | si:dkey-242g16.2  |
| ENSARG00000069735  | 21.67953976 | -3.132709701 | 0.114014585  | 8.770807671  | 0.806351341 | -3.885043085 | 0.000102312 | 0.004765396 | hbba2             | ZDB-GENE-081104-38   | hbba2             |
| ENSARG00000004953  | 17.78406697 | -3.146787308 | 0.112907458  | 8.85681085   | 1.102084156 | -2.855305823 | 0.004299541 | 0.080470953 | mxb               | ZDB-GENE-030721-6    | mxb               |
| ENSARG00000088524  | 4.051002146 | -3.234775917 | 0.106227123  | 9.413791611  | 0.883977812 | -3.659340623 | 0.000252865 | 0.009773553 | acot17            | ZDB-GENE-040426-2381 | acot17            |
| ENSARG00000068951  | 4.905756175 | -3.264089239 | 0.104090533  | 9.607021653  | 0.758829175 | -4.301480948 | 1.6966E-05  | 0.001065328 | si:ch211-219a15.4 | ZDB-GENE-060503-308  | si:ch211-219a15.4 |
| ENSARG00000056773  | 14.06904243 | -3.450758319 | 0.091457271  | 10.93406778  | 0.883236061 | -3.906949085 | 9.34688E-05 | 0.004443513 | zgc:163079        | ZDB-GENE-030131-7428 | zgc:163079        |
| ENSARG00000069734  | 26.05122144 | -3.459243735 | 0.090920931  | 10.99856755  | 0.954400814 | -3.624518842 | 0.0002895   | 0.010869836 | hbba2             | ZDB-GENE-040801-164  | hbba2             |
| ENSARG00000074150  | 44.78615756 | -3.596257776 | 0.08268344   | 12.0943202   | 0.506539257 | -7.09966252  | 1.25062E-12 | 4.18343E-10 | si:ch211-226h7.5  | ZDB-GENE-130531-3    | si:ch211-226h7.5  |
| ENSARG00000099719  | 14.67071504 | -3.622816311 | 0.081175248  | 12.31902619  | 0.437417204 | -8.282290411 | 1.20828E-16 | 1.01046E-13 | cdkn1d            | ZDB-GENE-110215-1    | cdkn1d            |
| ENSARG00000058556  | 271.5131585 | -3.633481265 | 0.080577382  | 12.41043058  | 0.372866468 | -9.74472519  | 1.94304E-22 | 3.972E-19   | muc5.2            | ZDB-GENE-121108-1    | muc5.2            |
| ENSARG00000092126  | 11.67012718 | -3.698049916 | 0.077050604  | 12.97848352  | 0.775338564 | -4.769593682 | 1.84598E-06 | 0.000152983 | vtg5              | ZDB-GENE-001201-4    | vtg5              |
| ENSARG00000052779  | 20.95896098 | -3.902750771 | 0.066858242  | 14.95701908  | 0.568471585 | -6.865340103 | 6.6333E-12  | 1.88864E-09 | zgc:153932        | ZDB-GENE-070209-223  | zgc:153932        |
| ENSARG00000093237  | 7.954390689 | -4.159346298 | 0.055964419  | 17.86849595  | 0.659192374 | -7.307452604 | 2.72254E-13 | 1.13839E-10 | si:ch211-89o9.4   | ZDB-GENE-090313-134  | si:ch211-89o9.4   |
| ENSARG00000033566  | 5.085319212 | -4.314041627 | 0.050274073  | 19.89096862  | 0.795214555 | -5.425003352 | 5.79535E-08 | 7.67128E-06 | cyp17a1           | ZDB-GENE-040213-2    | cyp17a1           |
| ENSARG00000068194  | 97.25695768 | -4.670342675 | 0.039272339  | 25.4632149   | 0.372523167 | -12.53705295 | 4.68081E-36 | 8.61175E-32 | klf9              | ZDB-GENE-060526-244  | klf9              |
| ENSARG00000098995  | 4.287204823 | -5.125812751 | 0.028640237  | 34.91591199  | 0.979863167 | -5.231151579 | 1.68457E-07 | 1.93705E-05 | cyp2k6            | ZDB-GENE-040426-1571 | cyp2k6            |
| ENSARG00000028396  | 530.1083819 | -5.369350271 | 0.024191595  | 41.33667009  | 0.654434524 | -8.204564513 | 2.31428E-16 | 1.77409E-13 | fkbp5             | ZDB-GENE-030616-630  | fkbp5             |
| ENSARG0000006137   | 12.64481614 | -5.760153965 | 0.018451041  | 54.19748367  | 0.806961211 | -7.138080353 | 9.46433E-13 | 3.22453E-10 | star              | ZDB-GENE-001120-3    | star              |
| ENSARG00000103024  | 8.506805503 | -12.46371398 | 0.000177031  | 5648.742353  | 4.185252064 | -2.978007966 | 0.002901284 | 0.060665592 | zgc:175136        | ZDB-GENE-080204-122  | zgc:175136        |
| ENSARG00000034989  | 10.57493606 | -12.60007462 | 0.000161064  | 6208.696162  | 1.976366166 | -6.375374581 | 1.82516E-10 | 4.30504E-08 | retsatl           | ZDB-GENE-051113-252  | retsatl           |
| ENSARG00000006580  | 8.787611977 | -13.877376   | 6.64498E-05  | 15048.95826  | 4.132853231 | -3.357819702 | 0.000785598 | 0.023576948 | clndnd            | ZDB-GENE-010328-4    | clndnd            |
